# Supplementary material for: Manganese Catalyzed Oximation of Hydrocarbons to Oximes
Source: Research Square preprint supplement (doi:10.21203/rs.3.rs-5773373/v1), 2025-02-26
Supplement: Supplementary file 1 [file c4a9ff7ae8bda812ffa0def9.pdf]

# Supplementary Information for

## Manganese Catalyzed Oximation of Hydrocarbons to Oximes

Menghui Song<sup>1†</sup>, Hong Li<sup>1†</sup>, Li Xie<sup>3</sup>, Xiaoxin Zhang<sup>3</sup>, Xiaotian Weilian<sup>1</sup>, Rucao Wang<sup>1</sup>,  
Alexander Steiner<sup>2</sup>, Huaming Sun<sup>1</sup>, Chao Wang<sup>1</sup>, Jianliang Xiao<sup>2\*</sup>, Chaoqun Li<sup>1\*</sup>

<sup>1</sup> Key Laboratory of Applied Surface and Colloid Chemistry, Ministry of Education and School of Chemistry and Chemical Engineering, Shaanxi Normal University, Xi'an 710062, China

<sup>2</sup> Department of Chemistry, University of Liverpool, Liverpool L69 7ZD, U.K

<sup>3</sup> State Key Laboratory of Petroleum Molecular & Process Engineering, Sinopec Research Institute of Petroleum Processing Co., LTD. Beijing, 100083, China

Email: [jxiao@liverpool.ac.uk](mailto:jxiao@liverpool.ac.uk) (J.L.X.); [lichaoqun@snnu.edu.cn](mailto:lichaoqun@snnu.edu.cn) (C.Q. L.)

†These authors contributed equally.

## Table of Contents

|                                                                         |     |
|-------------------------------------------------------------------------|-----|
| 1. The importance of oximes.....                                        | 3   |
| 2. Reported examples of catalytic C-H oxidation .....                   | 7   |
| 3. General considerations .....                                         | 8   |
| 4. Procedures for preparation of ligands and manganese catalysts.....   | 8   |
| 5. Optimization of reaction conditions for oximation.....               | 22  |
| 6. Mechanistic studies .....                                            | 34  |
| 7. Synthesis and characterization of substrates .....                   | 45  |
| 8. Synthesis of oximes from ketones to aid in product analysis .....    | 68  |
| 9. General procedure for oximation of hydrocarbons .....                | 70  |
| 10. Gram-scale synthesis of cyclododecanone oxime .....                 | 72  |
| 11. Oximation of propane to acetone oxime .....                         | 72  |
| 12. Analytical data of products .....                                   | 75  |
| 13. X-ray structures and crystallographic data.....                     | 159 |
| 14. References.....                                                     | 169 |
| 15. $^1\text{H}$ , $^{13}\text{C}$ and $^{19}\text{F}$ NMR spectra..... | 175 |
| 16. HPLC traces.....                                                    | 514 |

# 1. The importance of oximes

**Figure S-1.** Selected examples of oximes seen in drug and related bioactive molecules <sup>1-18</sup>

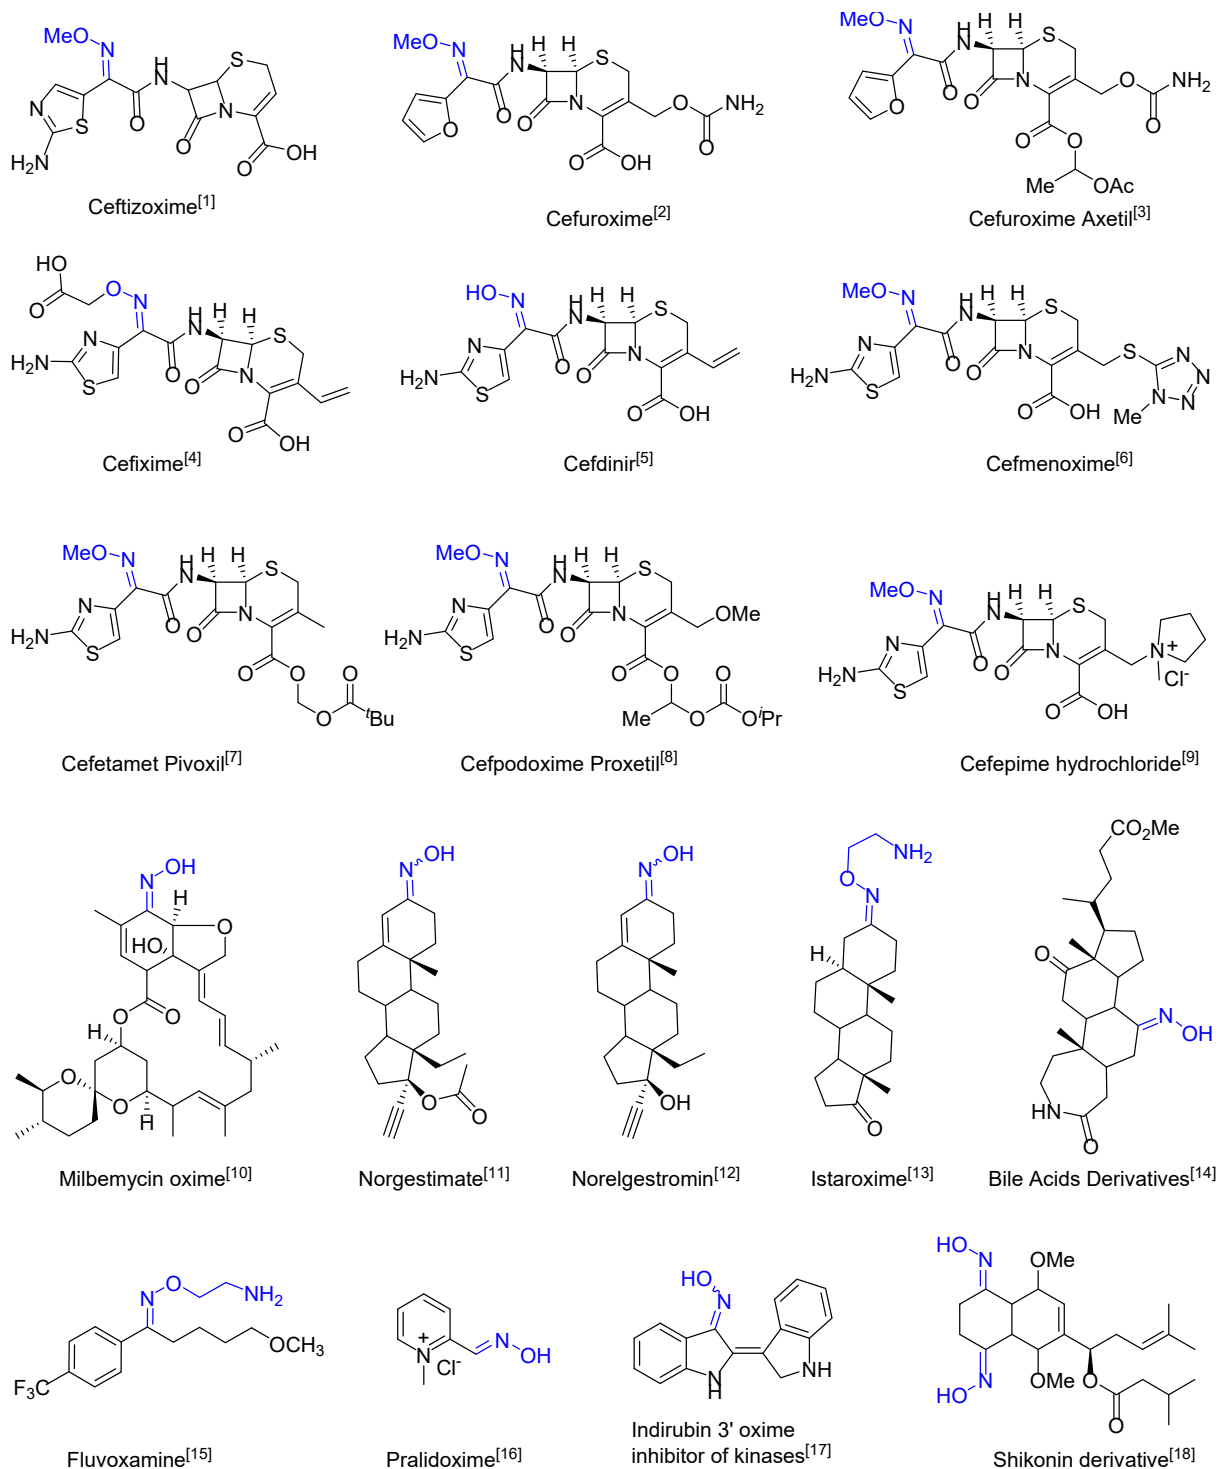

**Figure S-2.** Selected examples of oximes seen in natural products <sup>19-29</sup>

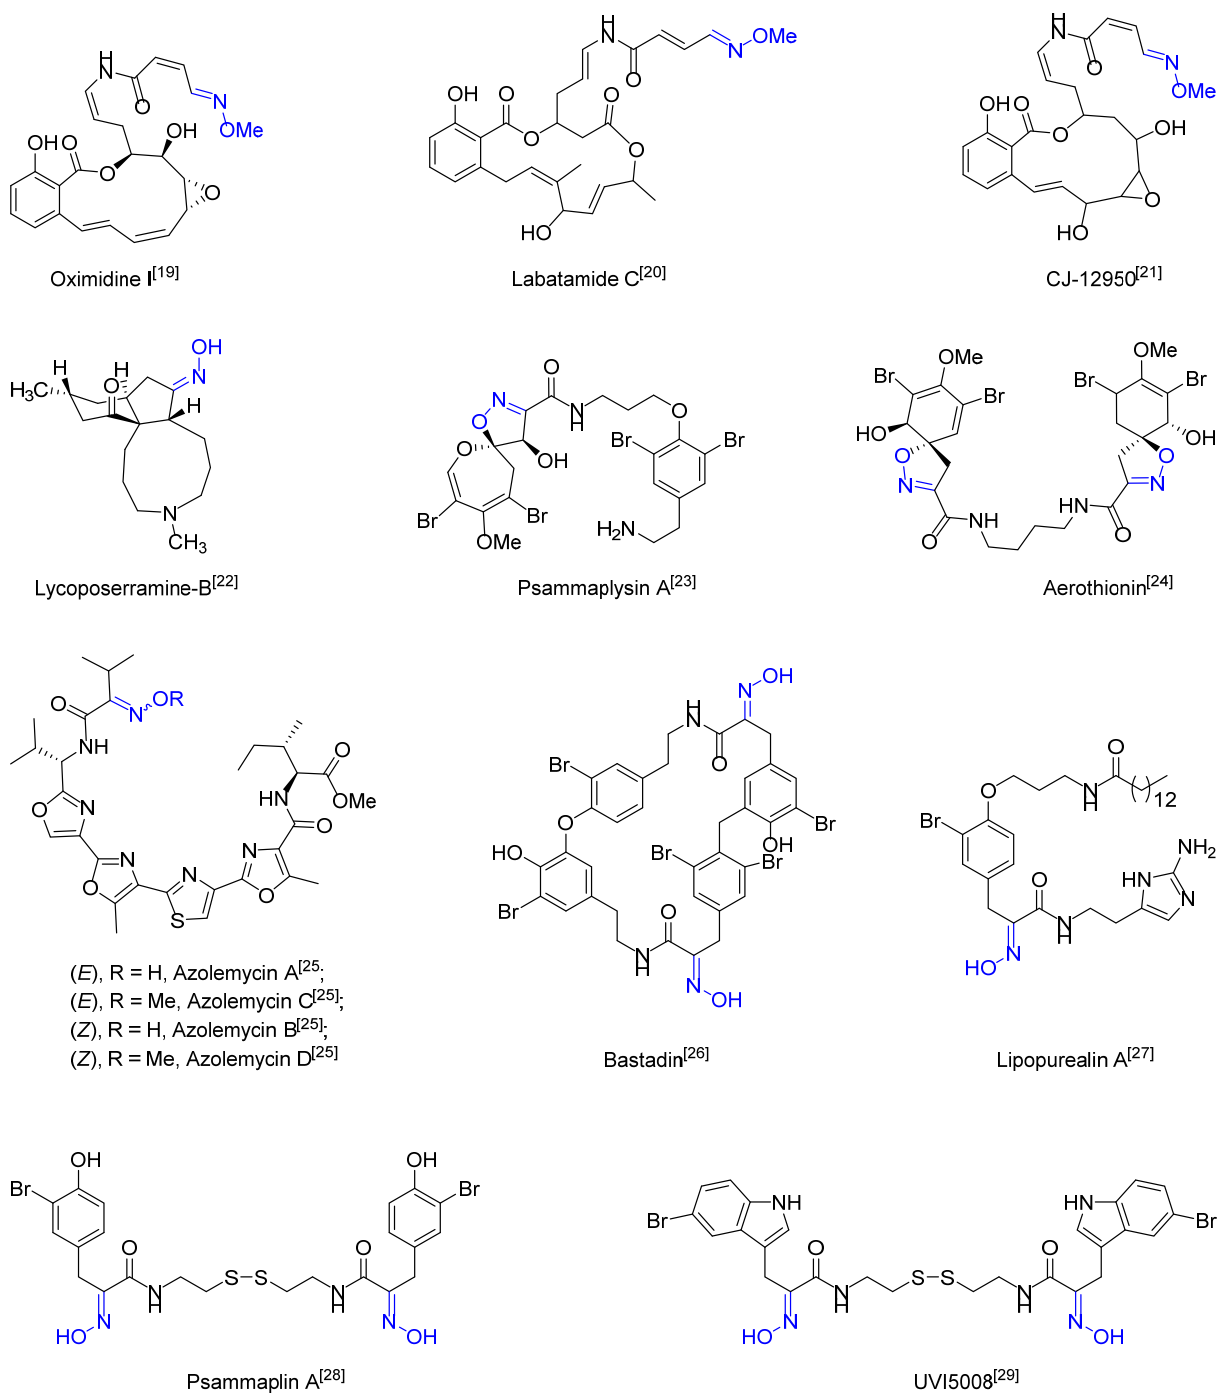

**Figure S-3.** Current industrial processes for synthesis of nylon-6 and nylon-12



**Figure S-3a.** Industrial processes for nylon-6 <sup>30-36</sup>

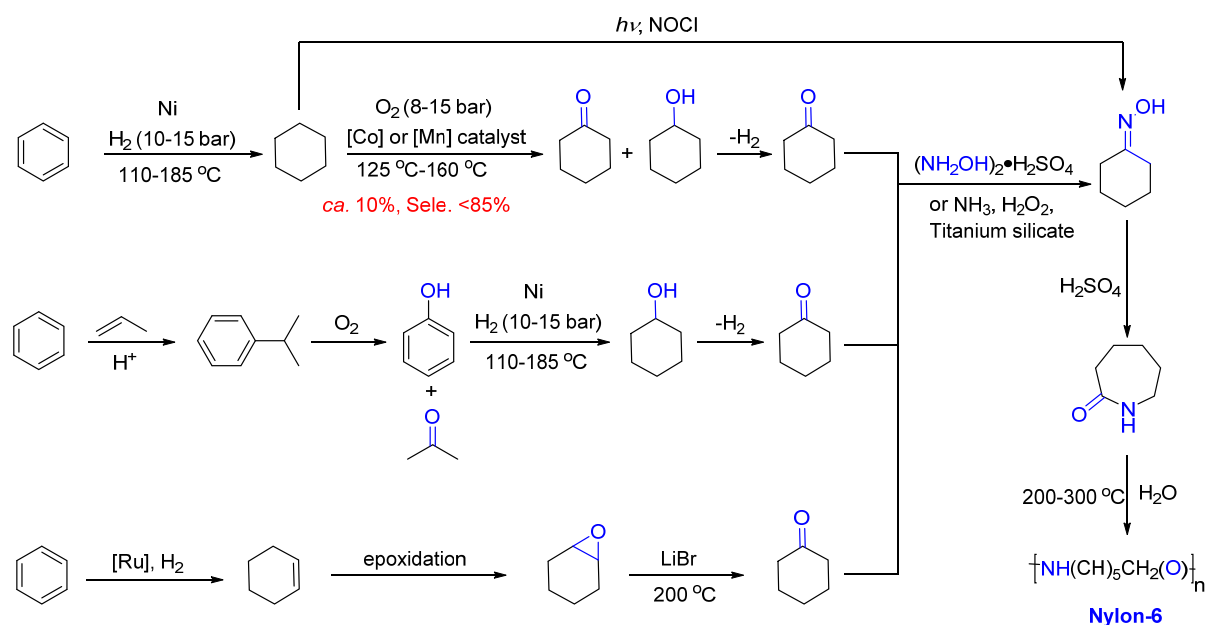

**Figure S-3b.** Industrial processes for nylon-12 <sup>34,37-40</sup>

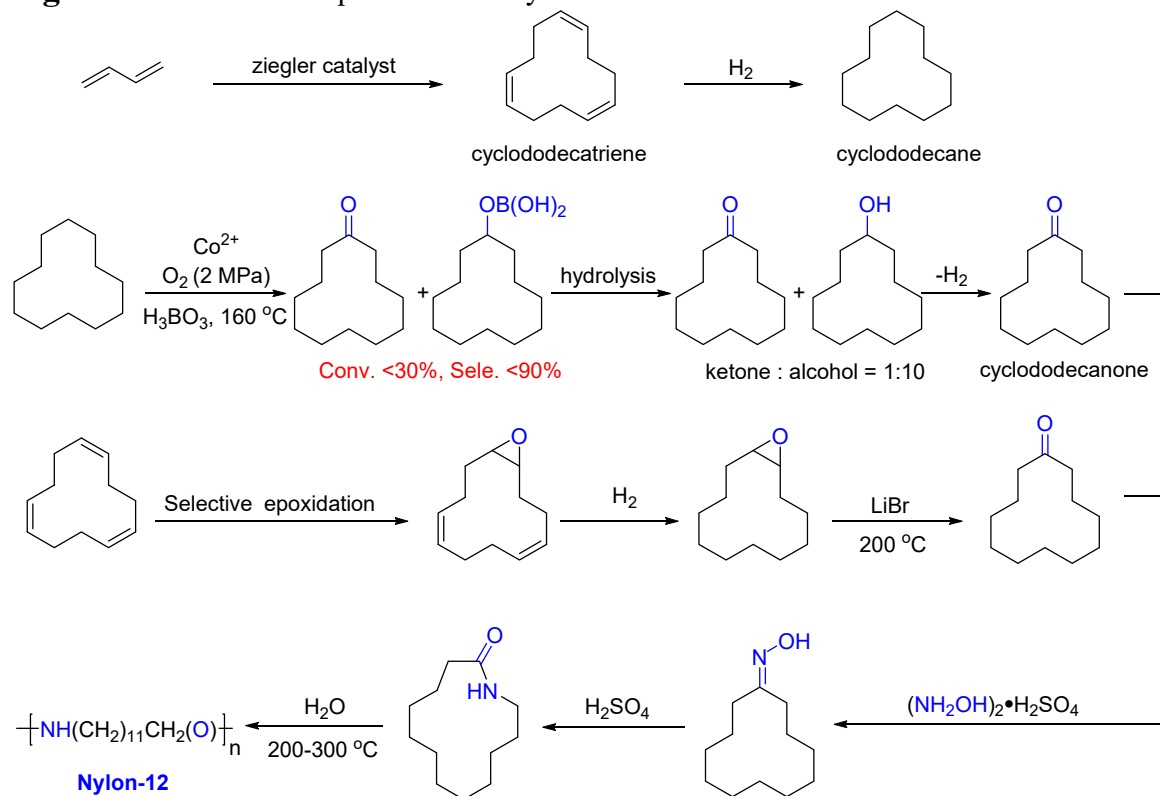

**Figure S-4.** Current industrial processes for synthesis of alkyl ketone oxime products <sup>41</sup>

**a) Synthesis of acetone oxime**

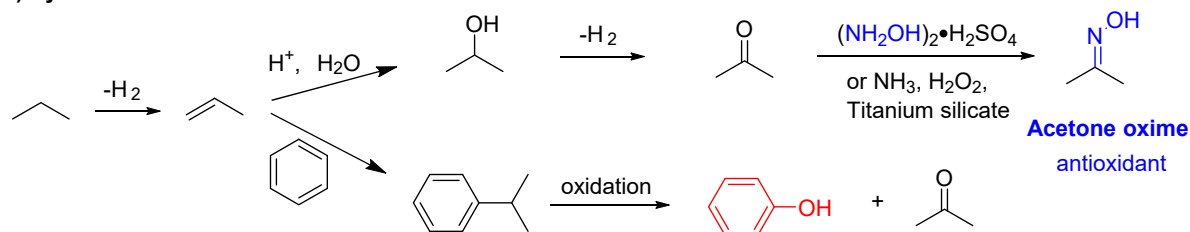

**b) Synthesis of 2-butanone oxime**

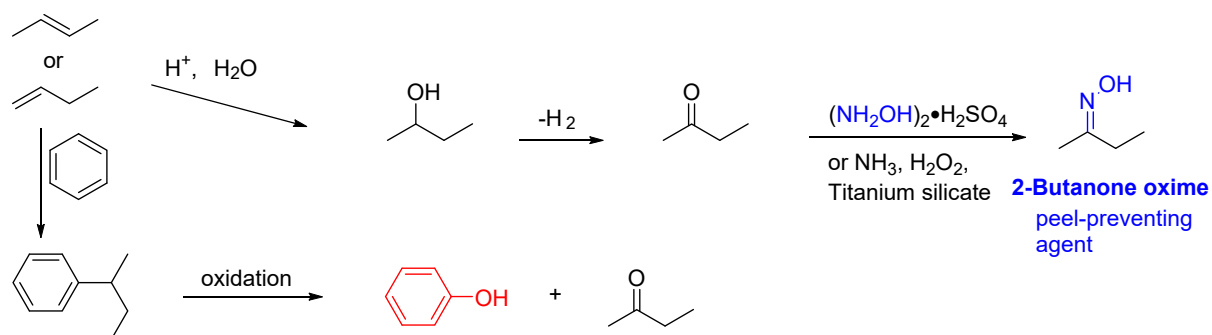

**c) Synthesis of 2-pentanone oxime**

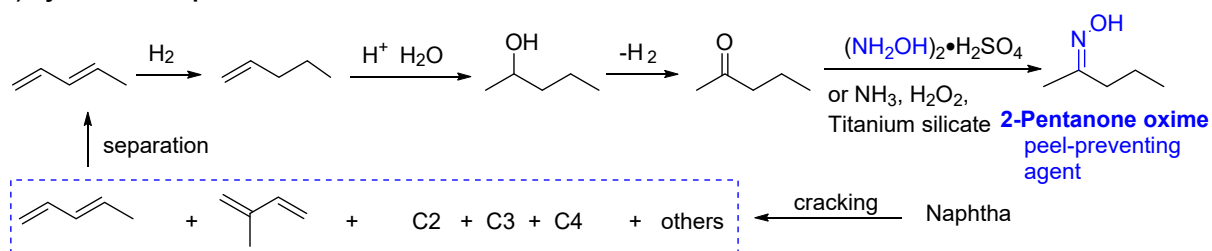

**d) Synthesis of cyclopentanone oxime**

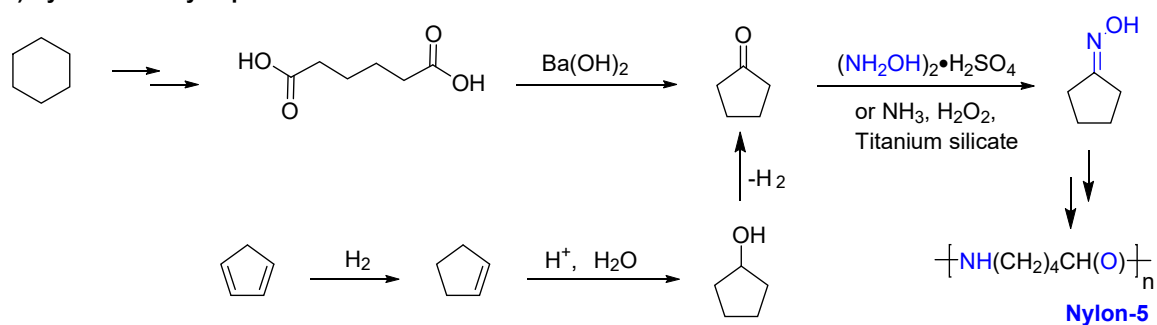

## 2. Reported examples of catalytic C-H oxidation

**Figure S-5.** Comparison of oximation (this work) with ketonization (literature)<sup>38, 42-57</sup>

|                                                                                                                                                                                                                                                                                                                                                                           |                                                                                                                                                                                                                                                                                                                                                                             |                                                                                                                                                                                                                                                                                                                                                      |                                                                                                                                                                                                                                                                                                                                                                                                                        |                                                                                                                                                                                                                                                                                                                                                    |
|---------------------------------------------------------------------------------------------------------------------------------------------------------------------------------------------------------------------------------------------------------------------------------------------------------------------------------------------------------------------------|-----------------------------------------------------------------------------------------------------------------------------------------------------------------------------------------------------------------------------------------------------------------------------------------------------------------------------------------------------------------------------|------------------------------------------------------------------------------------------------------------------------------------------------------------------------------------------------------------------------------------------------------------------------------------------------------------------------------------------------------|------------------------------------------------------------------------------------------------------------------------------------------------------------------------------------------------------------------------------------------------------------------------------------------------------------------------------------------------------------------------------------------------------------------------|----------------------------------------------------------------------------------------------------------------------------------------------------------------------------------------------------------------------------------------------------------------------------------------------------------------------------------------------------|
| 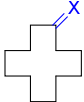 <p><b>1a (X = NOH):</b> 91%;<br/> <b>1a-one (X = O):</b><br/>         Electrochemical<sup>42</sup>: 21%<br/>         ([Co]+NHPI)<sup>43,38</sup>: 34% + acid<br/>         [Fe]<sup>44</sup>: 21% + A (A/K = 0.8)</p>                                                                    |  <p><b>2a (X = NOH):</b> 79%<br/> <b>2a-one (X = O):</b><br/>         ([Co]+NHPI)<sup>43,38</sup>: 27%<br/>         [Mn]<sup>45</sup>: 68%</p>                                                                                                                                             |  <p><b>3a (X = NOH):</b> 81%<br/> <b>3a-one (X = O):</b><br/>         [Mn]<sup>45</sup>: 89%<br/>         [Fe]<sup>46</sup>: 92%<br/>         [Mn]<sup>47</sup>: 70%</p>                                                                                            |  <p><b>4a (X = NOH):</b> 89%<br/> <b>4a-one (X = O):</b><br/>         Electrochemical<sup>42</sup>: 16%,<br/>         [Mn]<sup>45</sup>: 72%<br/>         [Fe]<sup>44</sup>: 29% + A (A/K = 0.5)</p>                                                                                                                                |  <p><b>5a (X = NOH):</b> 90%<br/> <b>5a-one (X = O):</b><br/>         Electrochemical<sup>42</sup>: 42%<br/>         ([Co]+NHPI)<sup>43,38</sup>: 50% + others<br/>         [Fe]<sup>44</sup>: 32% + A (A/K = 0.8)<br/>         [Mn]<sup>45</sup>: 86%</p>      |
|  <p><b>16a (X = NOH):</b><br/>         81%, <math>\gamma:\delta = 1.5:1</math><br/> <b>16a-one (X = O):</b><br/>         [Mn]<sup>48</sup>: 90%, <math>\gamma:\delta = 1:21</math></p>                                                                                                   |  <p><b>17a (X = NOH):</b><br/>         86%, <math>\gamma:\delta = 2.7:1</math><br/> <b>17a-one (X = O):</b><br/>         [Fe]<sup>49</sup>: 64%, <math>\gamma:\delta = 2:1</math><br/>         [Mn]<sup>50</sup>: 67%, <math>\gamma:\delta = 1.2:1</math></p>                              |  <p><b>19a (X = NOH):</b><br/>         43%, <math>\gamma:\delta = 2.5:1</math><br/> <b>19a-one (X = O):</b><br/>         [Mn]<sup>50</sup>: 37%, <math>\gamma:\delta = 0.8:1</math></p>                                                                             |  <p><b>20a (X = NOH):</b><br/>         80%, <math>\gamma:\delta = 1:2</math><br/> <b>20a-one (X = O):</b><br/>         [Mn]<sup>48</sup>: 85%, <math>\gamma:\delta = 1:5.5</math></p>                                                                                                                                               |  <p><b>21a (X = NOH):</b><br/>         84%, <math>\gamma:\delta = 1:1.3</math><br/> <b>21a-one (X = O):</b><br/>         [Fe]<sup>49</sup>: 73%, <math>\gamma:\delta = 1:1.6</math><br/>         [Mn]<sup>48</sup>: 94%, <math>\gamma:\delta = 1:5.3</math></p> |
|  <p><b>22a (X = NOH):</b><br/>         60%, <math>\gamma:\delta = 1:2.3</math><br/> <b>22a-one (X = O):</b><br/>         [Mn]<sup>48</sup>: 95%, <math>\gamma:\delta = 1:4.5</math><br/>         Electrochemical<sup>51</sup>:<br/>         50%, <math>\gamma:\delta = 1:1.4</math></p> |  <p><b>23a (X = NOH):</b><br/>         75%, <math>\gamma:\delta = 1:1.7</math><br/> <b>23a-one (X = O):</b><br/>         [TFDO]<sup>51</sup>: 92%, <math>\gamma:\delta = 1:5.6</math><br/>         Electrochemical<sup>51</sup>:<br/>         78%, <math>\gamma:\delta = 1:2.3</math></p> |  <p><b>24a (X = NOH):</b> 63%<br/> <b>24a-one (X = O):</b><br/>         [TFDO]<sup>51</sup>: 95%, <math>\gamma:\delta &gt; 1:20</math><br/>         Electrochemical<sup>51</sup>:<br/>         56%, <math>\gamma:\delta = 1:1.9</math></p>                         |  <p><b>11a (X = NOH):</b><br/>         58%, <math>\beta:\alpha = 2:5</math><br/> <b>11a-one (X = O):</b><br/>         [Mn]<sup>45</sup>: 36%, <math>\beta:\alpha = 1:1.5</math><br/>         [Fe]<sup>49</sup>: 56%, <math>\beta:\alpha = 1:1.1</math><br/>         [Fe]<sup>52</sup>: 57%, <math>\beta:\alpha = 1:1.1</math></p> |  <p><b>12a (X = NOH):</b> 50%<br/> <math>\gamma:\beta:\alpha = 1:3.3:8.3</math><br/> <b>12a-one (X = O):</b><br/>         [Fe]<sup>53</sup>: 50%<br/> <math>\gamma:\beta:\alpha = 1:2:2.9</math></p>                                                          |
|  <p><b>30a (X = NOH):</b><br/>         63%, <math>\gamma:\delta = 1:5</math><br/> <b>30a-one (X = O):</b><br/>         [Fe]<sup>49</sup>: 72%, <math>\gamma:\delta = 1:2.3</math><br/>         [Fe]<sup>52</sup>: 64%, <math>\gamma:\delta = 1:2.8</math></p>                          |  <p><b>32a (X = NOH):</b> 45%<br/> <b>32a-one (X = O):</b><br/>         [Fe]<sup>49</sup>: 69%, <math>\gamma:\delta = 1:3.6</math></p>                                                                                                                                                   |  <p><b>42a (X = NOH):</b><br/>         56%, <math>\delta:\epsilon = 1:9</math><br/> <b>42a-one (X = O):</b><br/>         [Fe]<sup>53</sup>: 26%, <math>\delta:\epsilon = 1:3.2</math><br/>         [Mn]<sup>48</sup>: 74%, <math>\gamma:\delta = 1:6.7</math></p> |  <p><b>44a (X = NOH):</b><br/>         63%, <math>\gamma:\delta:\epsilon = 1:6.7:16.7</math><br/> <b>44a-one (X = O):</b><br/>         [Fe]<sup>49</sup>: 83%, <math>\gamma:\delta:\epsilon = 1:1.3:3.6</math><br/>         [Mn]<sup>48</sup>: 76%, <math>\gamma:\delta:\epsilon = 1:6.5:41</math></p>                            |  <p><b>63a (X = NOH):</b><br/>         60%<br/> <b>63a-one (X = O):</b><br/>         [Rh]<sup>54</sup>: 92%</p>                                                                                                                                               |
|  <p><b>65a (X = NOH):</b><br/>         73%<br/> <b>65a-one (X = O):</b><br/>         [Rh]<sup>54</sup>: 79%</p>                                                                                                                                                                        |  <p><b>102a (X = NOH):</b><br/>         31%<br/> <b>102a-one (X = O):</b><br/>         [Mn]<sup>55</sup>: 66%</p>                                                                                                                                                                        |  <p><b>113a (X = NOH):</b><br/>         80%<br/> <b>113a-one (X = O):</b><br/>         [Mn]<sup>56</sup>: 95%</p>                                                                                                                                                 |  <p><b>120-oxime (X = NOH):</b><br/>         67%, C1:C2:C3=1:14:1.8<br/> <b>120-one (X = O):</b><br/>         [Fe]<sup>49</sup>: 78%, C2:C3=1.4:1<br/>         [Fe]<sup>53</sup>: 60%, C1:C2:C3=1:12.3:7<br/>         Electrochemical<sup>51</sup>: 51%, C2:C3=4.6:1</p>                                                           |  <p><b>122a (X = NOH):</b><br/>         56%<br/> <b>122-one (X = O):</b><br/>         [Fe]<sup>57</sup>: 52%</p>                                                                                                                                              |

### 3. General considerations

The following commercially obtained reagents for the C-H oximation reactions were used as received: H<sub>2</sub>O<sub>2</sub> (30 wt% in H<sub>2</sub>O, Sinopharm), AcOH (Sinopharm), <sup>t</sup>BuOH (Sinopharm), and CH<sub>3</sub>CN (Sinopharm). All oximation reactions were run under air with no precautions taken to exclude moisture. Commercial grade solvents used in the synthesis of components were used without further purification. Chemicals employed in the synthesis of ligands and substrates were purchased from commercial suppliers and used without further purification. <sup>1</sup>H NMR spectra were recorded on a Bruker Advance 400 (400 MHz) NMR spectrometer and reported in units of parts per million (ppm) relative to tetramethyl silane ( $\delta$  0 ppm) or CDCl<sub>3</sub> ( $\delta$  7.26 ppm) or DMSO-d<sub>6</sub> ( $\delta$  2.50 ppm) or CD<sub>3</sub>OD ( $\delta$  3.31 ppm). Multiplicities are given as: brs (broad singlet), s (singlet), d (doublet), t (triplet), q (quartet), quint (quintet), sextet (sext), heptet (hept), dd (doublets of doublet), dt (doublets of triplet) or m (multiplet). <sup>13</sup>C NMR spectra were recorded on a Bruker Advance 400 (100 MHz) NMR spectrometer and reported in ppm relative to CDCl<sub>3</sub> ( $\delta$  77.16 ppm) or DMSO-d<sub>6</sub> ( $\delta$  40.0 ppm) or CD<sub>3</sub>OD ( $\delta$  49.0 ppm). Coupling constants were reported as a *J* value in Hz. Gas chromatography was performed on a SHIMADZU GC-2014 with a WondaCap WAX column (df = 0.25  $\mu$ m, X = 30 m). For the products *E*-22a- $\delta$ -oxime, *E*-65a, 2*E*,4*E*-119a, *E*-120a, and *Z*-120b, the *E/Z* isomerism was assigned based on their X-ray structures; for the known products, the *E/Z* isomerism was assigned based on the literature reported; for the unknown products, we assumed the major isomer to be the thermodynamically more stable *E* isomer. The enantiomeric excess (*ee*) of substrate **115** and product **115a** was determined by chiral phase HPLC analysis on a SHIMADZU LC-2010A HT HPLC. Mass spectra were obtained by electrospray ionization (ESI) at the Analytical Services of the Chemistry Department, Shannxi Normal University. UV-vis absorption spectra were collected on a PerkinElmer Lambda 365 UV-VIS Spectrophotometer at room temperature (1 cm pathlength quartz cuvette). All reagents were prepared volumetrically and dispensed in stock solutions.

## 4. Procedures for preparation of ligands and manganese catalysts

### 4.1 Procedures for preparation of pyridine synthons

The pyridine synthons used for ligands synthesis were purchased from Bidepharm, Energy Chemical or synthesized following previously described procedures.<sup>46, 50, 56, 58-62</sup>

## 4.2 Procedures for preparation of ligands

### A. Synthesis of **L**<sup>1-2</sup> 46, 56, 58

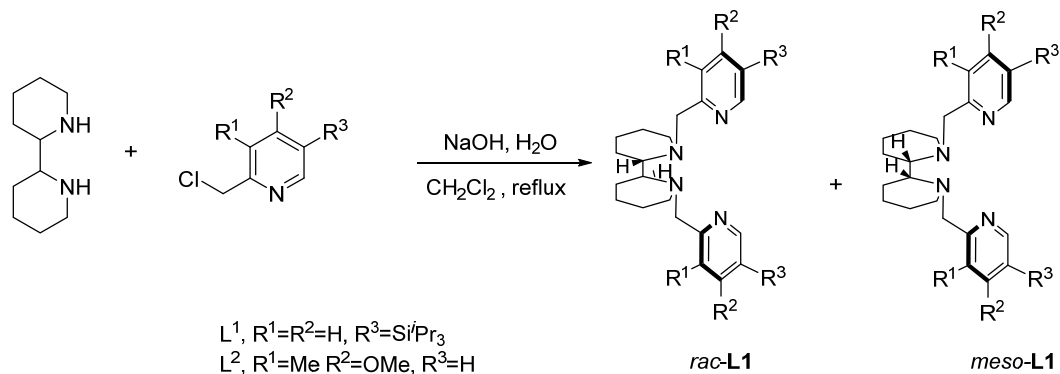

#### Synthesis of *rac*-**L**<sup>1</sup>, *meso*-**L**<sup>1</sup>, and *rac/meso*-**L**<sup>1</sup>:

To a solution of 2,2'-bipiperidine (336.6 mg, 2.0 mmol, 1 equiv.) and 2-(chloromethyl)-5-(triisopropylsilyl)pyridine (1192.5 mg, 4.2 mmol, 2.1 equiv.) dissolved in DCM (20.0 mL), sodium hydroxide (400.0 mg, 10 mmol, 5 equiv.) dissolved in water (5.0 mL) was added dropwise for 5 minutes at 0 °C. The resulting biphasic mixture was stirred for 6 days under reflux. After the reaction was complete (monitored by TLC), the mixture was diluted with DCM (20 mL) and transferred to a separatory funnel. Afterwards, 20.0 mL H<sub>2</sub>O was added and the mixture was extracted with DCM (3×20.0 mL). The combined organic layers were then dried over Na<sub>2</sub>SO<sub>4</sub>, and filtered. After concentration, the residue was purified by flash column chromatography on silica gel (petroleum ether/EtOAc/Et<sub>3</sub>N = 100:5:1 to 100:20:1) to give the racemic (*rac*) **rac-L**<sup>1</sup> (583.6 mg, 44% yield) and the *meso* analogue **meso-L**<sup>1</sup> (172.5 mg, 13% yield), separately with both as a white solid. The mixture of unseparated **rac/meso-L**<sup>1</sup> was prepared according to the same synthetic procedure; purification with flash column chromatography on silica gel (Petroleum ether/EtOAc/Et<sub>3</sub>N = 100:20:1) gave a mixture of **rac/meso-L**<sup>1</sup> (915.2 mg, 69% yield; *rac/meso* NMR ratio 35:9) as a white solid.

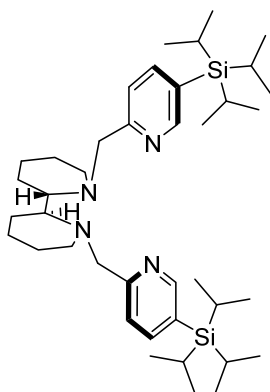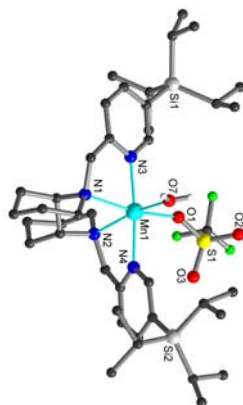

*rac*-C1

**(*rac*)-1,1'-Bis((5-(triisopropylsilyl)pyridin-2-yl)methyl)-2,2'-bipiperidine (*rac*-L<sup>1</sup>**, the structure of *rac*-L<sup>1</sup> was assigned based on the X-ray structure of *rac*-C1; see Section 13): <sup>1</sup>H NMR (400 MHz, CDCl<sub>3</sub>) δ (ppm): 8.59 (s, 2H), 7.71 (dd, *J* = 7.6, 1.6 Hz, 2H), 7.43 (d, *J* = 8.0 Hz, 2H), 4.26 (d, *J* = 14.4 Hz, 2H), 3.20 (d, *J* = 14.4 Hz, 2H), 2.86 (d, *J* = 11.6 Hz, 2H), 2.70 (d, *J* = 10.4 Hz, 2H), 2.05–1.92 (m, 6H), 1.73 (d, *J* = 12.4 Hz, 2H), 1.59–1.45 (m, 6H), 1.44–1.35 (m, 6H), 1.07 (d, *J* = 7.6 Hz, 36H); <sup>13</sup>C NMR (101 MHz, CDCl<sub>3</sub>) δ (ppm): 160.4, 154.9, 143.4, 127.4, 122.2, 62.7, 60.0, 55.1, 25.8, 24.9(2C), 18.6, 10.8; HRMS (ESI) *m/z* [M+H]<sup>+</sup> calculated for C<sub>40</sub>H<sub>71</sub>N<sub>4</sub>Si<sub>2</sub><sup>+</sup> 663.5212, found 663.5205.

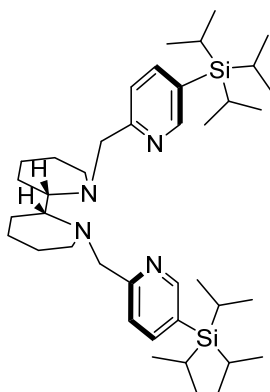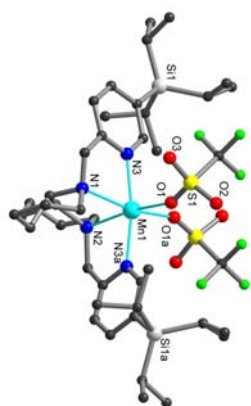

*meso*-C1

**(*meso*)-1,1'-Bis((5-(triisopropylsilyl)pyridin-2-yl)methyl)-2,2'-bipiperidine (*meso*-L<sup>1</sup>**, the structure of *meso*-L<sup>1</sup> was assigned based on the X-ray structure of *meso*-C1; see Section 13): <sup>1</sup>H NMR (400 MHz, CDCl<sub>3</sub>) δ (ppm): 8.57 (s, 2H), 7.74 (d, *J* = 7.6 Hz, 2H), 7.50 (d, *J* = 8.0 Hz, 2H), 4.92 (d, *J* = 14.8 Hz, 2H), 3.28 (d, *J* = 14.8 Hz, 2H), 2.82 (d, *J* = 12.8 Hz, 2H), 2.59 (d, *J* = 8.4 Hz,

2H), 2.01 (t,  $J = 10.8$  Hz, 2H), 1.76–1.63 (m, 6H), 1.46–1.26 (m, 12H), 1.08 (d,  $J = 7.6$  Hz, 36H);  $^{13}\text{C}$  NMR (101 MHz,  $\text{CDCl}_3$ )  $\delta$  (ppm): 161.2, 154.7, 143.6, 127.2, 122.0, 63.4, 60.4, 54.1, 27.3, 24.7(2C), 18.6, 10.8; HRMS (ESI)  $m/z$   $[\text{M}+\text{H}]^+$  calculated for  $\text{C}_{40}\text{H}_{71}\text{N}_4\text{Si}_2^+$  663.5212, found 663.5205.

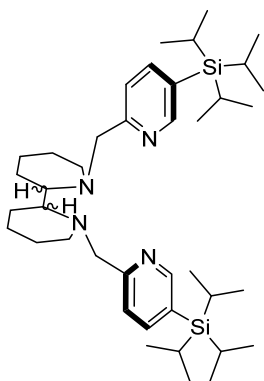

**(rac/meso)-1,1'-Bis((5-(triisopropylsilyl)pyridin-2-yl)methyl)-2,2'-bipiperidine (rac/meso- $\text{L}^1$   $\text{rac/meso} = 35:9$ ):**  $^1\text{H}$  NMR (400 MHz,  $\text{CDCl}_3$ )  $\delta$  (ppm): 8.60–8.55 (m, 2H), 7.76–7.68 (m, 2H), 7.52–7.40 (m, 2H), 4.92 (d,  $J = 14.8$  Hz, 0.36 H), 4.26 (d,  $J = 14.0$  Hz, 1.40 H), 3.31–3.16 (m, 2H), 2.92–2.78 (m, 2H), 2.76–2.54 (m, 2H), 2.08–1.88 (m, 4H), 1.78–1.65 (m, 3H), 1.58–1.31 (m, 13H), 1.08 (d,  $J = 7.2$  Hz, 36H);  $^{13}\text{C}$  NMR (101 MHz,  $\text{CDCl}_3$ )  $\delta$  (ppm): 161.1, 160.4, 154.9, 154.7, 143.6, 143.4, 127.4, 127.1, 122.2, 121.9, 62.7, 60.4, 59.9, 55.1, 54.2, 29.8, 27.3, 25.7, 24.9(2C), 24.7(2C), 18.6, 10.8; HRMS (ESI)  $m/z$   $[\text{M}+\text{H}]^+$  calculated for  $\text{C}_{40}\text{H}_{71}\text{N}_4\text{Si}_2^+$  663.5212, found 663.5205.

#### Synthesis of *rac*- $\text{L}^2$ , *meso*- $\text{L}^2$ and *rac/meso*- $\text{L}^2$ :

It was prepared in an analogous manner to *rac*- $\text{L}^1$  and *meso*- $\text{L}^1$  starting from 2,2'-bipiperidine (336.6 mg, 2.0 mmol, 1 equiv.) and 2-(chloromethyl)-4-methoxy-3-methylpyridine (720.8 mg, 4.2 mmol, 2.1 equiv.) to provide the racemic *rac*- $\text{L}^2$  (342.1 mg, 39% yield) and the meso analogue *meso*- $\text{L}^2$  (254.4 mg, 29% yield), as separated white solids.

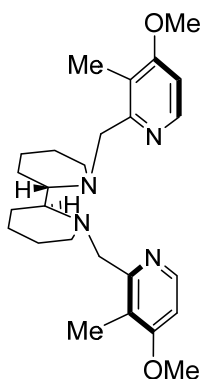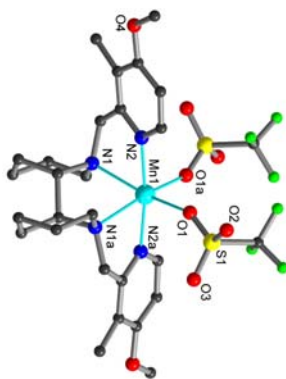

*rac*-C2

**(*rac*)-1,1'-Bis((4-methoxy-3-methylpyridin-2-yl)methyl)-2,2'-bipiperidine (*rac*-L<sup>2</sup>**, the structure of *rac*-L<sup>2</sup> was assigned based on the X-ray structure of *rac*-C2; see Section 13): <sup>1</sup>H NMR (400 MHz, CDCl<sub>3</sub>) δ (ppm): 8.29 (d, *J* = 5.6 Hz, 2H ), 6.62 (d, *J* = 5.6 Hz, 2H ), 4.18 (d, *J* = 12.4 Hz, 2H), 3.82 (s, 6H), 3.27 (d, *J* = 12.0 Hz, 2H), 2.63 (d, *J* = 11.2 Hz, 4H ), 2.24 (s, 6H), 2.05–1.95 (m, 4H), 1.67 (d, *J* = 12.8 Hz, 2H), 1.54–1.31 (m, 6H), 1.20–1.05 (m, 2H); <sup>13</sup>C NMR (101 MHz, CDCl<sub>3</sub>) δ (ppm): 163.8, 158.2, 147.7, 121.6, 104.3, 64.3, 59.6, 55.4, 54.4, 26.0, 24.9, 24.7, 10.6; **HRMS** (ESI) *m/z* [M+H]<sup>+</sup> calculated for C<sub>26</sub>H<sub>39</sub>N<sub>4</sub>O<sub>2</sub><sup>+</sup> 439.3068, found 439.3070.

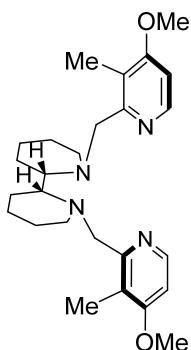

**(*meso*)-1,1'-Bis((4-methoxy-3-methylpyridin-2-yl)methyl)-2,2'-bipiperidine (*meso*-L<sup>2</sup>**, the structure of *meso*-L<sup>2</sup> was assigned based on analysis of <sup>1</sup>H NMR of *meso*-L<sup>2</sup>, and comparison of <sup>1</sup>H NMR of *meso*-L<sup>2</sup> with *rac*-L<sup>2</sup>): <sup>1</sup>H NMR (400 MHz, CDCl<sub>3</sub>) δ (ppm): 8.28–8.21 (m, 2H ), 6.66–6.61 (m, 2H ), 4.16 (d, *J* = 12.4 Hz, 2H ), 3.83 (s, 3H), 3.82 (s, 3H), 3.69 (d, *J* = 12.4 Hz, 2H), 2.82 (s, 2H ), 2.67–2.57 (m, 2H), 2.32 (d, *J* = 12.0 Hz, 2H), 2.19 (s, 3H), 2.18 (s, 3H), 1.74–1.65 (m, 2H), 1.62–1.49 (m, 4H), 1.25–1.19 (m, 2H), 1.10–1.02 (m, 2H), 1.00–0.87 (m, 2H); <sup>13</sup>C NMR (101 MHz, CDCl<sub>3</sub>) δ (ppm): 163.9, 159.2, 147.1, 122.1, 104.5, 58.9, 56.1, 55.4, 48.8,



21.4, 21.1, 20.5, 10.5; **HRMS** (ESI)  $m/z$   $[M+H]^+$  calculated for  $C_{26}H_{39}N_4O_2^+$  439.3068, found 439.3070.

## B. Synthesis of **L**<sup>3-12</sup> 46, 50, 56, 58-62

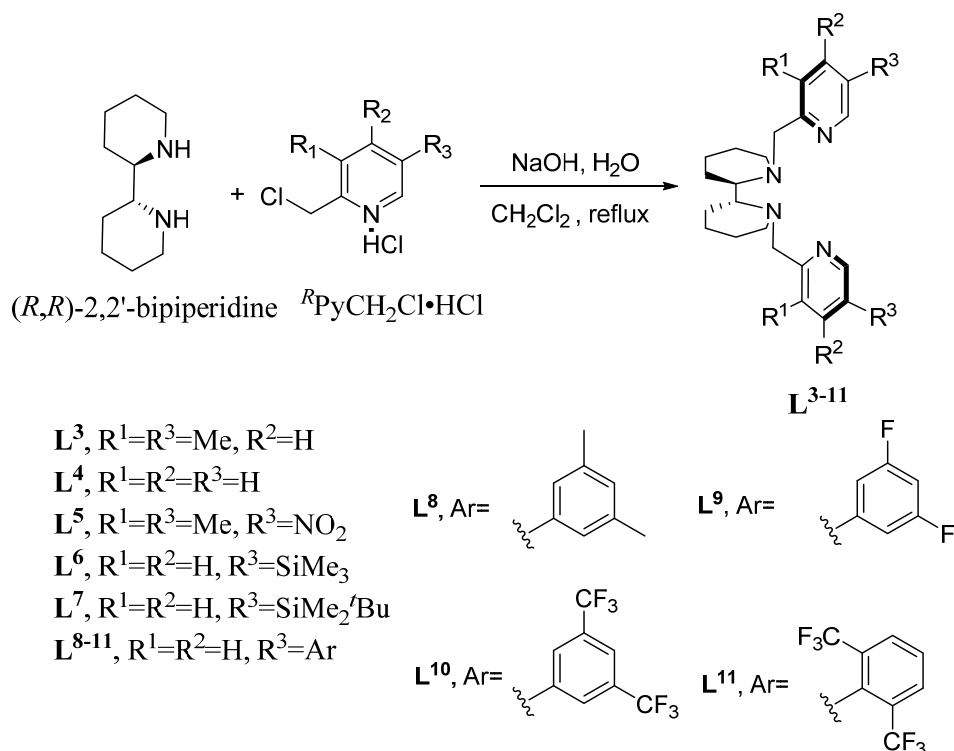

### Synthesis of **L**<sup>3-5</sup>:

**L**<sup>3</sup>, **L**<sup>4</sup> and **L**<sup>5</sup> were prepared following reported procedures <sup>56</sup>

### Synthesis of **L**<sup>6</sup> <sup>50, 56</sup>:

A solution containing (*R,R*)-2,2'-bipiperidine (168.3 mg, 1.0 mmol, 1.0 equiv.) and NaOH (0.32 g, 8.0 mmol, 8.0 equiv.) in H<sub>2</sub>O (5 mL) was added to a 50 mL round bottom flask charged with a stir bar and 2-(chloromethyl)-5-(trimethylsilyl)pyridine hydrochloride (496.0 mg, 2.1 mmol, 2.1 equiv.) dissolved in CH<sub>2</sub>Cl<sub>2</sub> (20 mL). The combined mixture was stirred for 3 days. After the reaction was complete, the aqueous phase was extracted with CH<sub>2</sub>Cl<sub>2</sub> (3 x 15 mL). The organic fractions were combined, and dried over MgSO<sub>4</sub>. After concentration, the residue was purified by flash column chromatography on silica gel (petroleum ether/EtOAc/Et<sub>3</sub>N = 100:5:1 to 100:30:1) to give **L**<sup>6</sup> (356.3 mg, yield 72%) as a white solid.

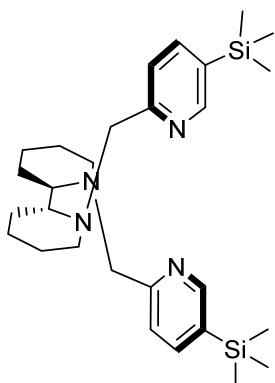

**(2*R*,2'*R*)-1,1'-Bis((5-(trimethylsilyl)pyridin-2-yl)methyl)-2,2'-bipiperidine (L<sup>6</sup>):** <sup>1</sup>H NMR (400 MHz, CDCl<sub>3</sub>) δ (ppm): 8.60 (s, 2H), 7.73 (dd, *J* = 7.6, 1.6 Hz, 2H), 7.43 (d, *J* = 7.6 Hz, 2H), 4.25 (d, *J* = 14.4 Hz, 2H), 3.21 (d, *J* = 14.4 Hz, 2H), 2.84 (d, *J* = 11.2 Hz, 2H), 2.73 (d, *J* = 10.4 Hz, 2H), 2.05–1.92 (m, 4H), 1.78–1.65 (m, 4H), 1.59–1.41 (m, 6H), 0.29 (s, 18H); <sup>13</sup>C NMR (101 MHz, CDCl<sub>3</sub>) δ (ppm): 160.8, 153.4, 141.6, 132.6, 122.2, 77.5, 62.4, 59.6, 55.0, 25.8, 24.9, -1.1. **HRMS** (ESI) *m/z* [M+H]<sup>+</sup> calculated for C<sub>28</sub>H<sub>47</sub>N<sub>4</sub>Si<sub>2</sub><sup>+</sup> 495.3334, found 495.3333.

#### Synthesis of L<sup>7</sup> <sup>50, 56</sup>:

It was prepared in an analogous manner to L<sup>6</sup> starting from (*R,R*)-2,2'-bipiperidine (168.3 mg, 1.0 mmol, 1 equiv.) and 5-(*tert*-butyldimethylsilyl)-2-(chloromethyl)pyridine hydrochloride (584.4 mg, 2.1 mmol, 2.1 equiv.) to provide 416.9 mg (72% yield) of a white solid.

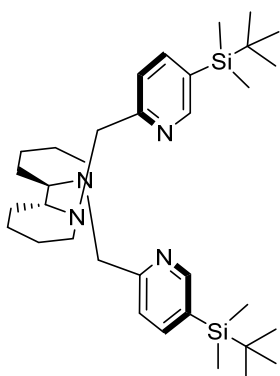

**(2*R*,2'*R*)-1,1'-Bis((5-(*tert*-butyldimethylsilyl)pyridin-2-yl)methyl)-2,2'-bipiperidine (L<sup>7</sup>):** <sup>1</sup>H NMR (400 MHz, CDCl<sub>3</sub>) δ (ppm): 8.60 (s, 2H), 7.72 (dd, *J* = 7.6, 2.0 Hz, 2H), 7.42 (d, *J* = 7.6 Hz, 2H), 4.26 (d, *J* = 14.0 Hz, 2H), 3.21 (d, *J* = 14.4 Hz, 2H), 2.84 (d, *J* = 10.8 Hz, 2H), 2.71 (d, *J* = 10.4 Hz, 2H), 2.05–1.91 (m, 4H), 1.73 (d, *J* = 10.4 Hz, 2H), 1.59–1.38 (m, 6H), 1.26–1.11 (m,

2H), 0.88 (s, 18H), 0.28 (s, 12H);  $^{13}\text{C}$  NMR (101 MHz,  $\text{CDCl}_3$ )  $\delta$  (ppm): 160.7, 154.2, 142.6, 130.2, 122.1, 77.5, 62.6, 59.7, 55.0, 26.5, 25.8, 24.9, 17.0, -6.2;

HRMS (ESI)  $m/z$   $[\text{M}+\text{H}]^+$  calculated for  $\text{C}_{34}\text{H}_{59}\text{N}_4\text{Si}_2^+$  579.4273, found 579.4274.

#### Synthesis of **L**<sup>8</sup> <sup>56, 59-60</sup>:

It was prepared in an analogous manner to **L**<sup>6</sup> starting from (*R,R*)-2,2'-bipiperidine (168.3 mg, 1.0 mmol, 1 equiv.) and 2-(chloromethyl)-5-(3,5-dimethylphenyl)pyridine hydrochloride (563.2 mg, 2.1 mmol, 2.1 equiv.) to provide 424.7 mg (76% yield) of a white solid.

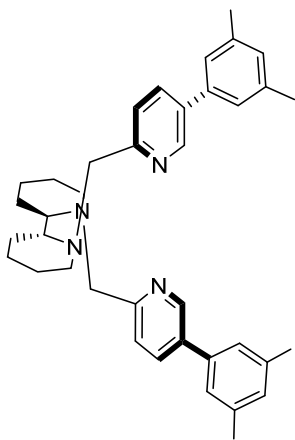

**(2*R*,2'*R*)-1,1'-bis((5-(3,5-dimethylphenyl)pyridin-2-yl)methyl)-2,2'-bipiperidine (**L**<sup>8</sup>):**  $^1\text{H}$  NMR (400 MHz,  $\text{CDCl}_3$ )  $\delta$  (ppm): 8.74 (d,  $J$  = 2.4 Hz, 2H), 7.80 (dd,  $J$  = 8.0, 2.0 Hz, 2H), 7.50 (d,  $J$  = 8.0 Hz, 2H), 7.18 (s, 4H), 7.03 (s, 2H), 4.32 (d,  $J$  = 14.4 Hz, 2H), 3.31 (d,  $J$  = 14.0 Hz, 2H), 2.89 (d,  $J$  = 11.6 Hz, 2H), 2.79 (d,  $J$  = 10.0 Hz, 2H), 2.39 (s, 12H), 2.15–1.92 (m, 4H), 1.78 (d,  $J$  = 12.8 Hz, 2H), 1.57–1.46 (m, 4H), 1.35–1.12 (m, 4H).  $^{13}\text{C}$  NMR (101 MHz,  $\text{CDCl}_3$ )  $\delta$  (ppm): 158.9, 147.5, 138.6, 137.9, 134.9, 134.8, 129.5, 125.0, 122.5, 62.4, 59.2, 54.8, 25.7, 25.1, 24.8, 21.4.

HRMS (ESI)  $m/z$   $[\text{M}+\text{H}]^+$  calculated for  $\text{C}_{38}\text{H}_{47}\text{N}_4^+$  559.3795, found 559.3806.

#### Synthesis of **L**<sup>9</sup> <sup>56, 59-60</sup>:

It was prepared in an analogous manner to **L**<sup>6</sup> starting from (*R,R*)-2,2'-bipiperidine (168.3 mg, 1.0 mmol, 1 equiv.) and 2-(chloromethyl)-5-(3,5-difluorophenyl)pyridine hydrochloride (579.8 mg, 2.1 mmol, 2.1 equiv.) to provide 419.5 mg (73% yield) of a white solid.

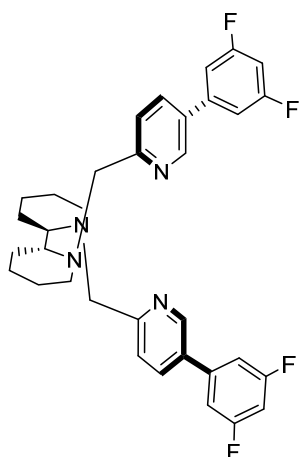

**(2*R*,2'*R*)-1,1'-bis((5-(3,5-difluorophenyl)pyridin-2-yl)methyl)-2,2'-bipiperidine (L<sup>9</sup>):** <sup>1</sup>H NMR (400 MHz, CDCl<sub>3</sub>) δ (ppm): 8.73 (s, 2H), 7.77 (dd, *J* = 8.0, 1.2 Hz, 2H), 7.55 (d, *J* = 8.0 Hz, 2H), 7.08 (d, *J* = 6.4 Hz, 4H), 6.83 (t, *J* = 8.8 Hz, 2H), 4.33 (d, *J* = 14.8 Hz, 2H), 3.33 (d, *J* = 14.4 Hz, 2H), 2.87 (d, *J* = 11.6 Hz, 2H), 2.78 (d, *J* = 10.4 Hz, 2H), 2.12–2.01 (m, 2H), 1.96 (d, *J* = 13.6 Hz, 2H), 1.78 (d, *J* = 8.0 Hz, 2H), 1.64–1.46 (m, 6H), 1.28–1.19 (m, 2H). <sup>13</sup>C NMR (101 MHz, CDCl<sub>3</sub>) δ (ppm): 163.6 (dd, *J* = 249.9, 13.1 Hz), 160.8, 147.3, 141.3 (t, *J* = 9.8 Hz), 134.8, 132.6, 122.8, 110.0 (dd, *J* = 18.8, 7.3 Hz), 103.3 (t, *J* = 25.6 Hz), 62.5, 59.2, 55.0, 25.7, 25.2, 24.9; <sup>19</sup>F NMR (376 MHz, CDCl<sub>3</sub>) δ (ppm): -108.89; HRMS (ESI) *m/z* [M+H]<sup>+</sup> calculated for C<sub>34</sub>H<sub>35</sub>F<sub>4</sub>N<sub>4</sub><sup>+</sup> 575.2792, found 575.2799.

#### Synthesis of L<sup>10</sup> <sup>56, 59-60</sup>:

It was prepared in an analogous manner to L<sup>6</sup> starting from (*R,R*)-2,2'-bipiperidine (168.3 mg, 1.0 mmol, 1 equiv.) and 5-(3,5-bis(trifluoromethyl)phenyl)-2-(chloromethyl)pyridine hydrochloride (789.9 mg, 2.1 mmol, 2.1 equiv.) to provide 542.3 mg (70% yield) of a white solid.

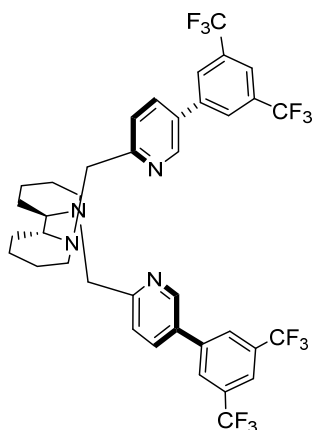

**(2*R*,2'*R*)-1,1'-Bis((5-(3,5-bis(trifluoromethyl)phenyl)pyridin-2-yl)methyl)-2,2'-bipiperidine (L<sup>10</sup>):** <sup>1</sup>H NMR (400 MHz, CDCl<sub>3</sub>) δ (ppm): 8.79 (s, 2H), 7.99 (s, 4H), 7.90 (s, 2H), 7.86 (dd, *J* = 8.0, 2.4 Hz, 2H), 7.63 (d, *J* = 8.0 Hz, 2H), 4.34 (d, *J* = 14.8 Hz, 2H), 3.38 (d, *J* = 10.8 Hz, 2H), 2.90–2.80 (m, 4H), 2.15–2.05 (m, 2H), 1.97 (d, *J* = 13.6 Hz, 2H), 1.79 (d, *J* = 14.8 Hz, 2H), 1.65–1.47 (m, 6H), 1.29–1.20 (m, 2H); <sup>13</sup>C NMR (101 MHz, CDCl<sub>3</sub>) δ (ppm): 161.4, 147.5, 140.3, 135.1, 132.5 (q, *J* = 34.3 Hz), 129.5 (q, *J* = 3.9 Hz), 127.3, 123.3 (q, *J* = 273.8 Hz), 123.0, 121.7 (q, *J* = 3.5 Hz), 62.3, 59.2, 55.0, 25.7, 25.1, 24.8. <sup>19</sup>F NMR (376 MHz, CDCl<sub>3</sub>) δ (ppm): -62.89; HRMS (ESI) *m/z* [M+H]<sup>+</sup> calculated for C<sub>38</sub>H<sub>35</sub>F<sub>12</sub>N<sub>4</sub><sup>+</sup> 775.2665, found 775.2676.

#### Synthesis of L<sup>11</sup> <sup>56, 59-60</sup>:

It was prepared in an analogous manner to L<sup>6</sup> starting from (*R,R*)-2,2'-bipiperidine (168.3 mg, 1.0 mmol, 1 equiv.) and 5-(2,6-bis(trifluoromethyl)phenyl)-2-(chloromethyl)pyridine hydrochloride (789.9 mg, 2.1 mmol, 2.1 equiv.) to provide 511.3 mg (66% yield) of a white solid.

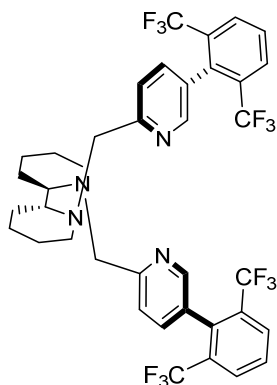

**(2*R*,2'*R*)-1,1'-Bis((5-(2,6-bis(trifluoromethyl)phenyl)pyridin-2-yl)methyl)-2,2'-bipiperidine (L<sup>11</sup>):** <sup>1</sup>H NMR (400 MHz, CDCl<sub>3</sub>) δ (ppm): 8.42 (s, 2H), 7.98 (d, *J* = 7.6 Hz, 4H), 7.66 (t, *J* = 8.0 Hz, 2H), 7.56–7.50 (m, 4H), 4.37 (d, *J* = 14.4 Hz, 2H), 3.34 (d, *J* = 14.4 Hz, 2H), 2.85 (d, *J* = 12.0 Hz, 2H), 2.77 (d, *J* = 10.4 Hz, 2H), 2.14–2.03 (m, 2H), 1.98 (d, *J* = 13.6 Hz, 2H), 1.79 (d, *J* = 12.4 Hz, 2H), 1.65–1.43 (m, 6H), 1.29–1.21 (m, 2H); <sup>13</sup>C NMR (101 MHz, CDCl<sub>3</sub>) δ (ppm): 160.7, 149.1, 137.7, 137.0, 131.9 (q, *J* = 29.8 Hz), 129.4 (d, *J* = 5.2 Hz), 128.7, 128.1, 123.2 (q, *J* = 275.7 Hz), 121.2, 62.7, 59.8, 55.0, 25.7, 25.2, 24.8. <sup>19</sup>F NMR (376 MHz, CDCl<sub>3</sub>) δ (ppm): -57.40 HRMS (ESI) *m/z* [M+H]<sup>+</sup> calculated for C<sub>38</sub>H<sub>35</sub>F<sub>12</sub>N<sub>4</sub><sup>+</sup> 775.2665, found 775.2669.

**C synthesis of L<sup>12-16</sup>:** L<sup>12</sup> <sup>62</sup>, L<sup>13</sup> <sup>50</sup>, L<sup>14</sup> <sup>59</sup>, L<sup>15</sup> <sup>56</sup> and L<sup>16</sup> <sup>62</sup> were prepared following reported procedures

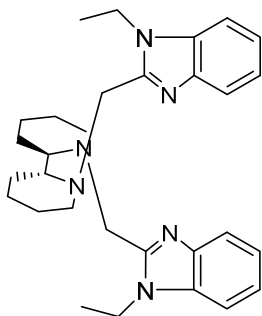

**(2*R*,2'*R*)-1,1'-Bis((1-ethyl-1*H*-benzo[d]imidazol-2-yl)methyl)-2,2'-bipiperidine (L<sup>12</sup>):** <sup>1</sup>H NMR (400 MHz, CDCl<sub>3</sub>) δ (ppm): 7.78–7.72 (m, 2H), 7.35–7.28 (m, 2H), 7.26–7.20 (m, 4H), 4.53–4.40 (m, 2H), 4.35 (d, *J* = 13.6 Hz, 2H), 4.31–4.19 (m, 2H), 3.55 (d, *J* = 13.2 Hz, 2H), 2.74 (d, *J* = 10.0 Hz, 2H), 2.68 (d, *J* = 11.6 Hz, 2H), 2.19 (dt, *J* = 11.6, 2.8 Hz, 2H), 1.94–1.88 (m, 4H), 1.78–1.70 (m, 2H), 1.59–1.48 (m, 4H), 1.42 (t, *J* = 7.2 Hz, 6H), 1.31–1.18 (m, 2H). <sup>13</sup>C NMR (101 MHz, CDCl<sub>3</sub>) δ (ppm): 151.6, 142.6, 135.3, 122.5, 121.9, 119.7, 109.3, 63.8, 54.7, 52.3, 38.7, 25.5, 25.1, 24.4, 15.1.

**HRMS** (ESI) *m/z* [M+H]<sup>+</sup> calculated for C<sub>30</sub>H<sub>41</sub>N<sub>6</sub><sup>+</sup> 485.3387, found 485.3391.

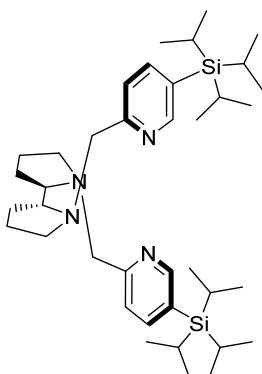

**(2*R*,2'*R*)-1,1'-Bis((5-(triisopropylsilyl)pyridin-2-yl)methyl)-2,2'-bipyrrolidine (L<sup>13</sup>):** <sup>1</sup>H NMR (400 MHz, CDCl<sub>3</sub>) δ (ppm): 8.57 (s, 2H), 7.70 (dd, *J* = 7.6, 1.6 Hz, 2H), 7.37 (d, *J* = 7.6 Hz, 2H), 4.16 (d, *J* = 14.0 Hz, 2H), 3.48 (d, *J* = 14.4 Hz, 2H), 3.03 (quint, *J* = 4.4 Hz, 2H), 2.77 (t, *J* = 6.4 Hz, 2H), 2.23 (q, *J* = 8.8 Hz, 2H), 1.83–1.74 (m, 4H), 1.73–1.65 (m, 4H), 1.45–1.32 (m, 6H), 1.06 (d, *J* = 8.0 Hz, 36H); <sup>13</sup>C NMR (101 MHz, CDCl<sub>3</sub>) δ (ppm): 160.5, 154.8, 143.5, 127.5, 122.3, 65.5, 61.4, 55.7, 25.9, 23.6, 18.6, 10.8.

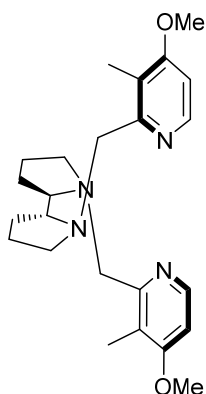

**(2*R*,2'*R*)-1,1'-Bis((4-methoxy-3-methylpyridin-2-yl)methyl)-2,2'-bipyrrolidine (L<sup>14</sup>):** <sup>1</sup>H NMR (400 MHz, CDCl<sub>3</sub>) δ (ppm): 8.25 (d, *J* = 6.4 Hz, 2H), 6.66 (d, *J* = 6.4 Hz, 2H), 4.08 (d, *J* = 12.0 Hz, 2H), 3.84 (s, 6H), 3.38 (d, *J* = 11.6 Hz, 2H), 2.74 (t, *J* = 8.0 Hz, 2H), 2.61 (t, *J* = 6.8 Hz, 2H), 2.28–2.19 (m, 2H), 2.23 (s, 6H), 1.76–1.46 (m, 8H). <sup>13</sup>C NMR (101 MHz, CDCl<sub>3</sub>) δ (ppm): 163.9, 158.4, 147.3, 121.8, 104.8, 65.4, 60.7, 55.6, 55.4, 26.1, 24.2, 10.4.

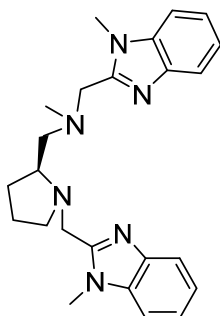

**(*S*)-N-methyl-1-(1-methyl-1*H*-benzo[*d*]imidazol-2-yl)-N-((1-((1-methyl-1*H*-benzo[*d*]imidazol-2-yl)methyl)pyrrolidin-2-yl)methyl)methanamine (L<sup>15</sup>):** <sup>1</sup>H NMR (400 MHz, CDCl<sub>3</sub>) δ (ppm): 7.68–7.60 (m, 2H), 7.22–7.10 (m, 6H), 4.19 (d, *J* = 13.2 Hz, 1H), 3.72 (s, 3H), 3.70–3.58 (m, 3H), 3.57 (s, 3H), 2.72–2.60 (m, 2H), 2.46–2.40 (m, 1H), 2.36–2.21 (m, 2H), 2.18 (s, 3H), 1.93–1.82 (m, 1H), 1.59–1.38 (m, 3H); <sup>13</sup>C NMR (101 MHz, CDCl<sub>3</sub>) δ (ppm): 152.4, 151.8, 142.3, 136.3, 136.2, 122.6, 122.4, 122.0, 121.8, 119.7, 119.6, 109.2, 109.1, 62.7, 62.1, 56.1, 55.0, 52.5, 43.3, 30.4, 29.9, 22.7.

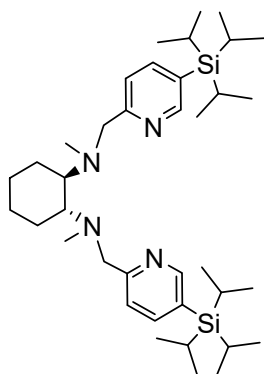

**(1*R*,2*R*)-*N*<sup>1</sup>,*N*<sup>2</sup>-dimethyl-*N*<sup>1</sup>,*N*<sup>2</sup>-bis((5-(triisopropylsilyl)pyridin-2-yl)methyl)cyclohexane-1,2-diamine (**L**<sup>16</sup>):** <sup>1</sup>H NMR (400 MHz, CDCl<sub>3</sub>) δ (ppm): 8.51 (s, 2H), 7.65 (d, *J* = 8.0 Hz, 2H), 7.56 (d, *J* = 7.6 Hz, 2H), 3.88 (d, *J* = 14.8 Hz, 2H), 3.76 (d, *J* = 14.8 Hz, 2H), 2.63 (d, *J* = 9.2 Hz, 2H), 2.25 (s, 6H), 1.98–1.90 (m, 2H), 1.71 (d, *J* = 8.4 Hz, 2H), 1.39–1.30 (m, 6H), 1.29–1.09 (m, 4H), 1.02 (d, *J* = 8.0 Hz, 36H); <sup>13</sup>C NMR (101 MHz, CDCl<sub>3</sub>) δ (ppm): 161.5, 154.4, 143.3, 127.1, 122.2, 64.8, 60.6, 36.8, 26.1, 25.9, 18.5, 10.7.

#### 4.3 Procedures for preparation of manganese catalysts <sup>46, 50, 56, 58-62</sup>

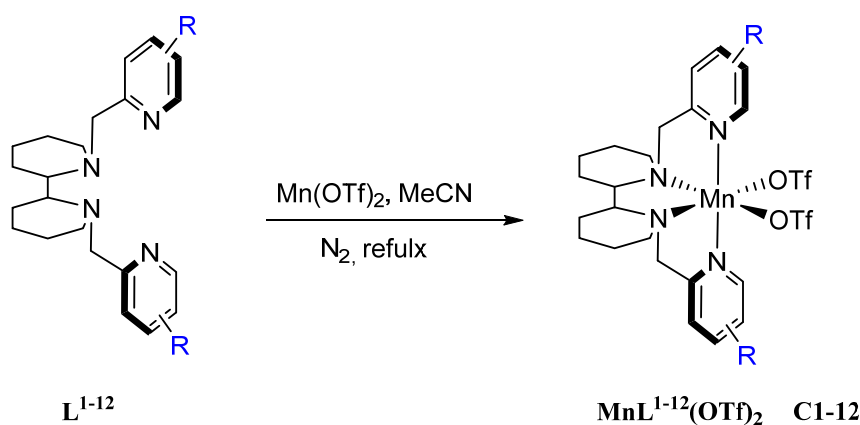

**C3-5** and **C13-16** were prepared following the procedures reported by White <sup>46</sup>, Costas <sup>49, 59, 62</sup> and our group <sup>56</sup>, *et. al.*

**C1** and **C2** were prepared according to the following procedure:

**L**<sup>1</sup> or **L**<sup>2</sup> (0.5 mmol, 1 equiv.) and Mn(OTf)<sub>2</sub> (0.5 mmol, 177 mg) were placed in an oven-dried, resealable Schlenk tube. The tube was capped with a Teflon screwcap, evacuated, and backfilled with nitrogen. The screw cap was replaced with a rubber septum, and dry CH<sub>3</sub>CN (4.0 mL) was added via a syringe. The tube was purged with nitrogen for 1-2 minutes, and then the septum was replaced with the Teflon screw cap. The tube was sealed, and the reaction mixture was heated at



80 °C overnight. Then the resulting mixture was cooled to room temperature, and the solvent was removed under reduced pressure to afford the desired manganese catalyst.

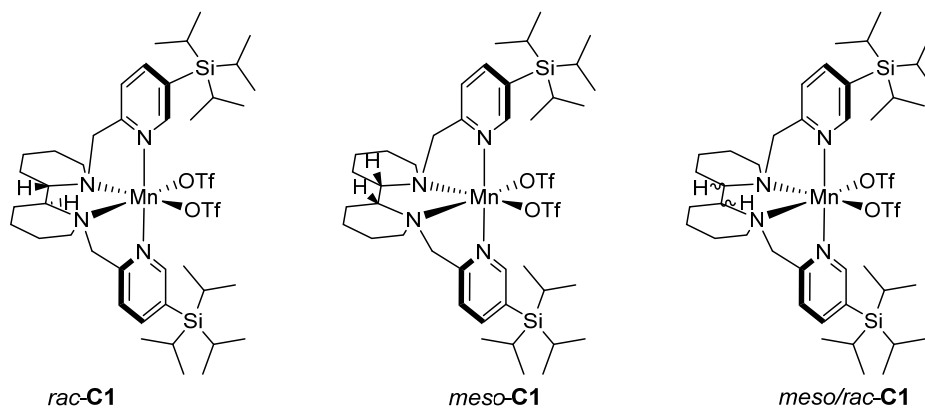

**(*Rac-C1*)** was prepared according to the above procedure starting from (*rac-L*<sup>1</sup>) and Mn(OTf)<sub>2</sub> to obtain the product as a yellow solid. HRMS (ESI) *m/z* calcd for C<sub>41</sub>H<sub>70</sub>F<sub>3</sub>MnN<sub>4</sub>O<sub>3</sub>SSi [M-OTf]<sup>+</sup>: 866.4040, found: 866.4026. The X-ray structure of *rac-C1* has been determined and is presented in Section 13.

**(*Meso-C1*)** was prepared according to the above procedure starting from (*meso-L*<sup>1</sup>) and Mn(OTf)<sub>2</sub> to obtain the product as a yellow solid. HRMS (ESI) *m/z* calcd for C<sub>41</sub>H<sub>70</sub>F<sub>3</sub>MnN<sub>4</sub>O<sub>3</sub>SSi [M-OTf]<sup>+</sup>: 866.4040, found: 866.4027. The X-ray structure of *meso-C1* has been determined and is presented in Section 13.

**(*Meso/rac-C1*)** was prepared in analogous manner starting from a mixture of *rac-L*<sup>1</sup> and *meso-L*<sup>1</sup> (*rac/meso-L*<sup>1</sup>, 35/9) and Mn(OTf)<sub>2</sub> to obtain the product as a yellow solid comprised of *rac-C1* and *meso-C1*.

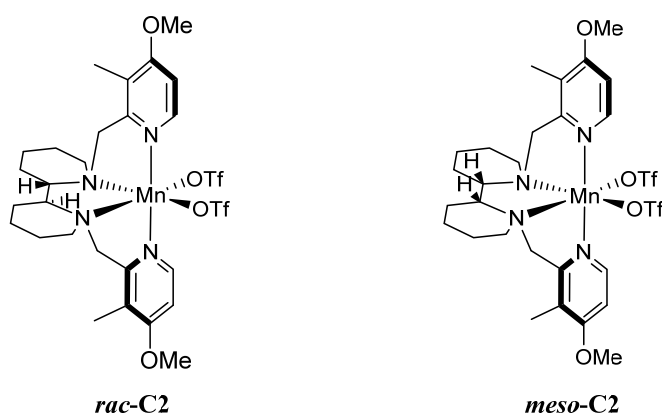

**(*Rac-C2*)** was prepared according to the above procedure starting from (*rac-L*<sup>2</sup>) and Mn(OTf)<sub>2</sub> to obtain the product as a yellow solid. HRMS (ESI) *m/z* calcd for C<sub>27</sub>H<sub>38</sub>F<sub>3</sub>MnN<sub>4</sub>O<sub>5</sub>S [M-OTf]<sup>+</sup>:

642.1896, found: 642.1890; The X-ray structure of **rac-C2** has been determined and is presented in Section 13.

(**Meso-C2**) was prepared according to the above procedure starting from (**meso-L<sup>1</sup>**) and Mn(OTf)<sub>2</sub> to obtain the product as a yellow solid. **HRMS** (ESI) *m/z* calcd for C<sub>27</sub>H<sub>38</sub>F<sub>3</sub>MnN<sub>4</sub>O<sub>5</sub>S [M-OTf]<sup>+</sup>: 642.1896, found: 642.1890;

## 5. Optimization of reaction conditions for oximation

**Table S-1.** Screening manganese catalysts for oximation of cyclododecane<sup>a</sup>

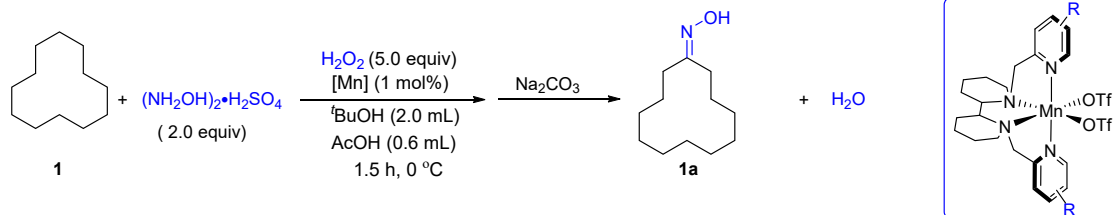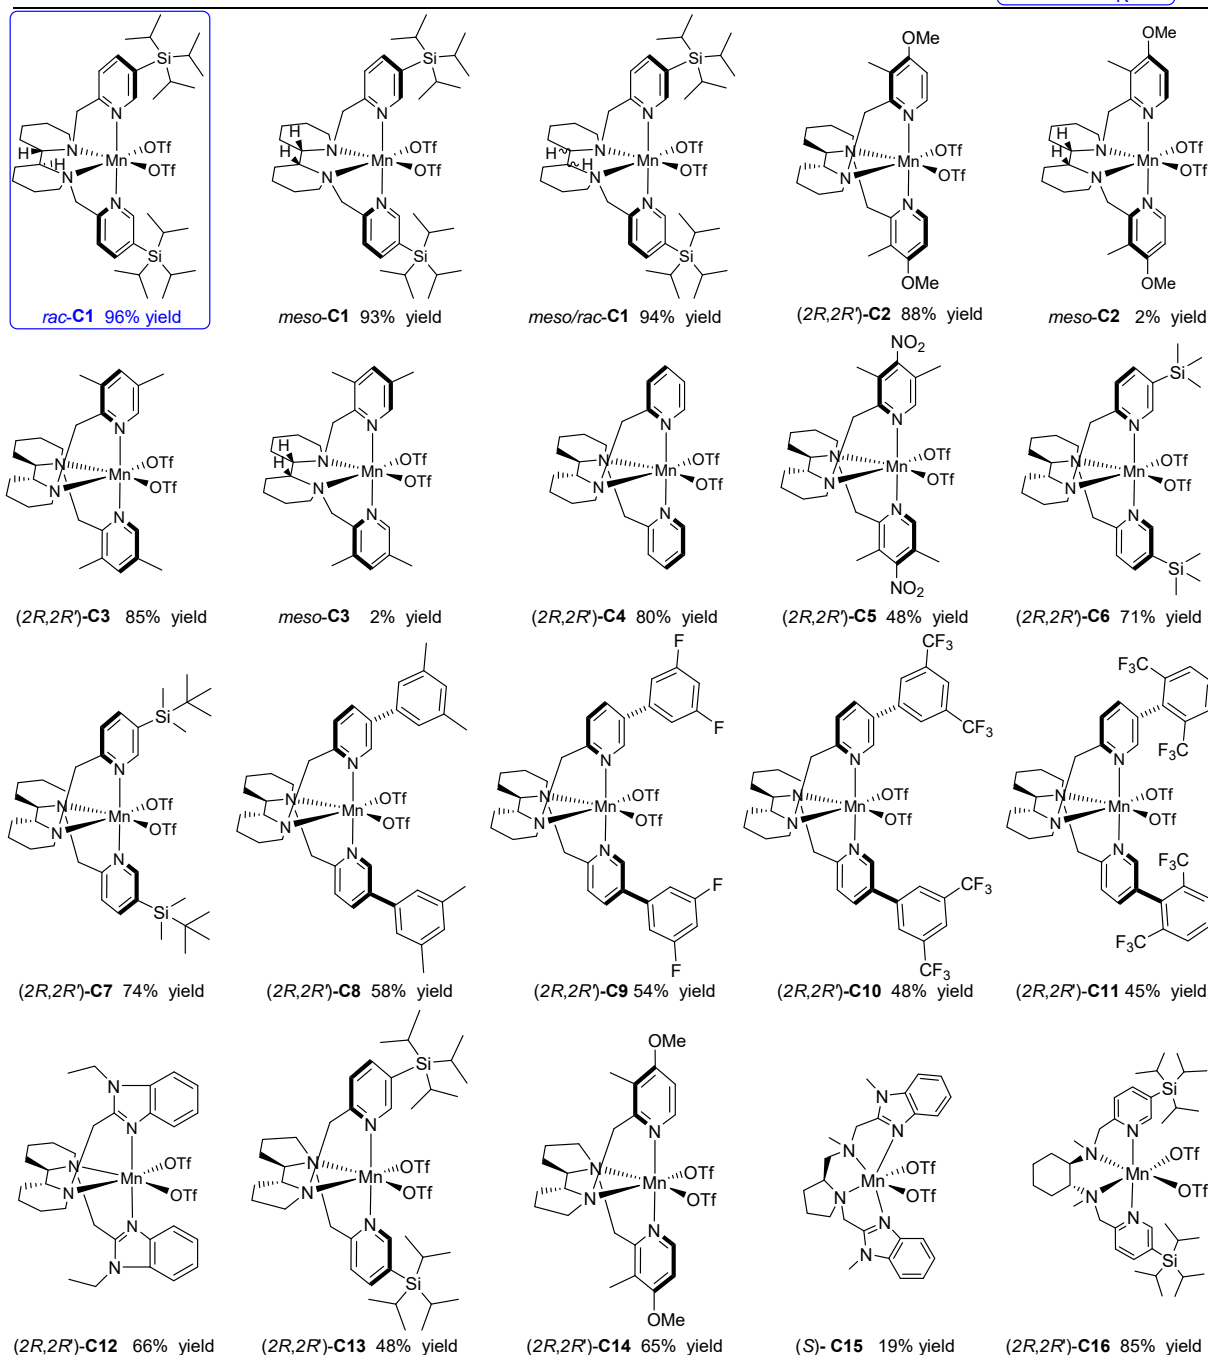

<sup>a</sup> General conditions: **1** (1 equiv., 0.5 mmol), (NH<sub>2</sub>OH)<sub>2</sub>·H<sub>2</sub>SO<sub>4</sub> (2 equiv., 1.0 mmol), [Mn] (1 mol%), <sup>t</sup>BuOH (1 mL), AcOH (0.6 mL) and H<sub>2</sub>O<sub>2</sub> (284  $\mu$ L, 2.5 mmol, 5 equiv., 30% wt. in H<sub>2</sub>O) in 1.0 mL <sup>t</sup>BuOH added dropwise via a syringe pump over 1 h under stirring at 0 °C. After stirring for an additional 0.5 h, the solution was quenched with Na<sub>2</sub>SO<sub>3</sub> and then basified with Na<sub>2</sub>CO<sub>3</sub> powder for 0.5 h at 0 °C; yield determined by <sup>1</sup>H NMR of crude reaction mixture.

**Table S-2.** Optimization conditions for oximation of cyclododecane<sup>a</sup>

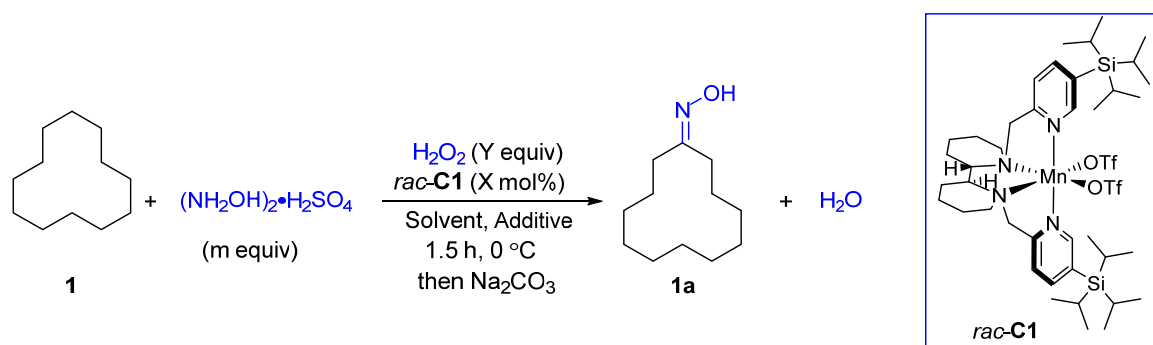

| Entry | [Mn]<br>(X mol%)                                                        | $(\text{NH}_2\text{OH})_2\cdot\text{H}_2\text{SO}_4$<br>(m equiv.) | $\text{H}_2\text{O}_2$<br>(Y equiv.) | Solvent<br>(Z mL)                        | Additive<br>(n mL)                                     | Yield of <sup>b</sup><br><b>1a</b> (%) |
|-------|-------------------------------------------------------------------------|--------------------------------------------------------------------|--------------------------------------|------------------------------------------|--------------------------------------------------------|----------------------------------------|
| 1     | <i>rac-C1</i> (1.0)                                                     | 2.0                                                                | 5.0                                  | <i>t</i> BuOH (2.0)                      | AcOH (0.6)                                             | 96                                     |
| 2     | <i>rac-L</i> <sup>1</sup> (1.0)+Mn(OTf) <sub>2</sub> (1.0)              | 2.0                                                                | 5.0                                  | <i>t</i> BuOH (2.0)                      | AcOH (0.6)                                             | 96                                     |
| 3     | <i>rac-L</i> <sup>1</sup> (1.0)+Mn(OAc) <sub>2</sub> (1.0)              | 2.0                                                                | 5.0                                  | <i>t</i> BuOH (2.0)                      | AcOH (0.6)                                             | 95                                     |
| 4     | <i>rac-L</i> <sup>1</sup> (1.0)+Mn(OAc) <sub>3</sub> (1.0)              | 2.0                                                                | 5.0                                  | <i>t</i> BuOH (2.0)                      | AcOH (0.6)                                             | 82                                     |
| 5     | <i>rac-L</i> <sup>1</sup> (1.0)+MnSO <sub>4</sub> (1.0)                 | 2.0                                                                | 5.0                                  | <i>t</i> BuOH (2.0)                      | AcOH (0.6)                                             | 54                                     |
| 6     | <i>rac-L</i> <sup>1</sup> (1.0)+Mn(NO <sub>3</sub> ) <sub>2</sub> (1.0) | 2.0                                                                | 5.0                                  | <i>t</i> BuOH (2.0)                      | AcOH (0.6)                                             | 93                                     |
| 7     | <i>rac-C1</i> (0.5)                                                     | 2.0                                                                | 5.0                                  | <i>t</i> BuOH (2.0)                      | AcOH (0.6)                                             | 66                                     |
| 8     | <i>rac-C1</i> (1.0)                                                     | 2.0                                                                | 5.0                                  | <i>t</i> BuOH (1.5)                      | AcOH (0.6)                                             | 84                                     |
| 9     | <i>rac-C1</i> (1.0)                                                     | 2.0                                                                | 5.0                                  | <i>t</i> BuOH (2.5)                      | AcOH (0.6)                                             | 95                                     |
| 10    | <i>rac-C1</i> (1.0)                                                     | 2.0                                                                | 5.0                                  | <i>t</i> BuOH (3.0)                      | AcOH (0.6)                                             | 95                                     |
| 11    | <i>rac-C1</i> (1.0)                                                     | 1.5                                                                | 5.0                                  | <i>t</i> BuOH (2.0)                      | AcOH (0.6)                                             | 85                                     |
| 12    | <i>rac-C1</i> (1.0)                                                     | 2.5                                                                | 5.0                                  | <i>t</i> BuOH (2.0)                      | AcOH (0.6)                                             | 91                                     |
| 13    | <i>rac-C1</i> (1.0)                                                     | 2.0                                                                | 3.0                                  | <i>t</i> BuOH (2.0)                      | AcOH (0.6)                                             | 67                                     |
| 14    | <i>rac-C1</i> (1.0)                                                     | 2.0                                                                | 4.0                                  | <i>t</i> BuOH (2.0)                      | AcOH (0.6)                                             | 85                                     |
| 15    | <i>rac-C1</i> (1.0)                                                     | 2.0                                                                | 6.0                                  | <i>t</i> BuOH (2.0)                      | AcOH (0.6)                                             | 80                                     |
| 16    | <i>rac-C1</i> (1.0)                                                     | 2.0                                                                | 5.0                                  | <i>t</i> BuOH (2.0)                      | AcOH (1.4)                                             | 80                                     |
| 17    | <i>rac-C1</i> (1.0)                                                     | 2.0                                                                | 5.0                                  | <i>t</i> BuOH (2.0)                      | AcOH (1.2)                                             | 85                                     |
| 18    | <i>rac-C1</i> (1.0)                                                     | 2.0                                                                | 5.0                                  | <i>t</i> BuOH (2.0)                      | AcOH (1.0)                                             | 89                                     |
| 19    | <i>rac-C1</i> (1.0)                                                     | 2.0                                                                | 5.0                                  | <i>t</i> BuOH (2.0)                      | AcOH (0.8)                                             | 91                                     |
| 20    | <i>rac-C1</i> (1.0)                                                     | 2.0                                                                | 5.0                                  | <i>t</i> BuOH (2.0)                      | AcOH (0.4)                                             | 86                                     |
| 21    | <i>rac-C1</i> (1.0)                                                     | 2.0                                                                | 5.0                                  | <i>t</i> BuOH (2.0)                      | ClCH <sub>2</sub> CO <sub>2</sub> H (1.0) <sup>c</sup> | 76                                     |
| 22    | <i>rac-C1</i> (1.0)                                                     | 2.0                                                                | 5.0                                  | <i>t</i> BuOH (2.0)                      | HCO <sub>2</sub> H (1.0)                               | <5                                     |
| 23    | <i>rac-C1</i> (1.0)                                                     | 2.0                                                                | 5.0                                  | <i>t</i> BuOH (2.0)                      | Pivalic acid (1.0)                                     | 77                                     |
| 24    | <i>rac-C1</i> (1.0)                                                     | 2.0                                                                | 5.0                                  | CH <sub>3</sub> CN (2.0)                 | AcOH (1.0)                                             | 75                                     |
| 25    | <i>rac-C1</i> (1.0)                                                     | 2.0                                                                | 5.0                                  | DCM (2.0)                                | AcOH (1.0)                                             | 73                                     |
| 26    | <i>rac-C1</i> (1.0)                                                     | 2.0                                                                | 5.0                                  | EtOAc (2.0)                              | AcOH (1.0)                                             | 71                                     |
| 27    | <i>rac-C1</i> (1.0)                                                     | 2.0                                                                | 5.0                                  | MeOH (2.0)                               | AcOH (1.0)                                             | <5                                     |
| 28    | <i>rac-C1</i> (1.0)                                                     | 2.0                                                                | 5.0                                  | CF <sub>3</sub> CH <sub>2</sub> OH (2.0) | AcOH (1.0)                                             | 67                                     |
| 29    | <i>rac-C1</i> (1.0)                                                     | 2.0                                                                | 5.0                                  | Et <sub>2</sub> O (2.0)                  | AcOH (1.0)                                             | 23                                     |
| 30    | <i>rac-C1</i> (1.0)                                                     | 2.0                                                                | 5.0                                  | THF (2.0)                                | AcOH (1.0)                                             | 24                                     |
| 31    | <i>rac-C1</i> (1.0)                                                     | 2.0 <sup>d</sup>                                                   | 5.0                                  | <i>t</i> BuOH (2.0)                      | AcOH (0.6)                                             | 0                                      |

<sup>a</sup> General conditions: **1** (1 equiv., 0.5 mmol),  $(\text{NH}_2\text{OH})_2\cdot\text{H}_2\text{SO}_4$  (m equiv.), *rac-C1* (X mol%), solvent (Z/2 mL), additive (n mL), and  $\text{H}_2\text{O}_2$  (Y equiv., 30% wt. in  $\text{H}_2\text{O}$ ) in Z/2 mL *t*BuOH added dropwise via a syringe pump over 1 h with under stirring at 0 °C; after stirring for an additional 0.5 h, the solution was quenched with  $\text{Na}_2\text{SO}_3$  and then basified with  $\text{Na}_2\text{CO}_3$  powder for 0.5 h at 0 °C; <sup>b</sup> yield determined by <sup>1</sup>H NMR of crude reaction mixture; <sup>c</sup> 1.0 equiv.; <sup>d</sup>  $\text{NH}_2\text{OH}$  instead of  $(\text{NH}_2\text{OH})_2\cdot\text{H}_2\text{SO}_4$ .

**Table S-3.** Effect of the amount of AcOH on oximation of **17**<sup>a</sup>.

| Entry | AcOH (X mL) | Isolate yield of <b>17a</b> (%) <sup>b</sup> | <b>17a-δ-oxime</b> /<br><b>17a-γ-oxime</b> <sup>b</sup> | ( <i>E</i> )- <b>17a-γ-oxime</b> /<br>( <i>Z</i> )- <b>17a-γ-oxime</b> <sup>b</sup> |
|-------|-------------|----------------------------------------------|---------------------------------------------------------|-------------------------------------------------------------------------------------|
| 1     | 1.2         | 54%                                          | 2.7:1                                                   | 1:1                                                                                 |
| 2     | 1.6         | 61%                                          | 2.7:1                                                   | 1:1                                                                                 |
| 3     | 2.0         | 70%                                          | 2.7:1                                                   | 1:1                                                                                 |
| 4     | 2.4         | 79%                                          | 2.7:1                                                   | 1:1                                                                                 |
| 5     | 2.8         | 86%                                          | 2.7:1                                                   | 1:1                                                                                 |
| 6     | 3.2         | 84%                                          | 2.7:1                                                   | 1:1                                                                                 |

<sup>a</sup> General conditions: **17** (1.0 mmol), *rac*-**C1** (1 mol%), (NH<sub>2</sub>OH)<sub>2</sub>·H<sub>2</sub>SO<sub>4</sub> (2.0 mmol), and AcOH (X mL) were dissolved in *t*-BuOH (2.0 mL), and then H<sub>2</sub>O<sub>2</sub> (5.0 equiv., 5.0 mmol, 567 μL, 30% wt. in H<sub>2</sub>O) in 2 mL of *t*-BuOH introduced with a syringe pump over 1 h under stirring at 0 °C; after stirring for an additional 0.5 h, the solution was quenched with Na<sub>2</sub>SO<sub>3</sub> and then basified with Na<sub>2</sub>CO<sub>3</sub> powder for 0.5 h at 0 °C; <sup>b</sup> yield, site selectivities and the ratio of *E/Z* determined by <sup>1</sup>H NMR of crude reaction mixture.

**Table S-4.** Effect of the amount of AcOH on oximation of **30**<sup>a</sup>.

| Entry | AcOH (X mL) | Isolate yield of <b>30a</b> (%) <sup>b</sup> | <b>30a-δ-oxime</b> /<br><b>30a-γ-oxime</b> <sup>b</sup> | <i>E/Z</i> of <b>30a-δ-oxime</b> <sup>b</sup> | <i>E/Z</i> of <b>30a-γ-oxime</b> <sup>b</sup> |
|-------|-------------|----------------------------------------------|---------------------------------------------------------|-----------------------------------------------|-----------------------------------------------|
| 1     | 1.2         | 32%                                          | 5:1                                                     | 3:1                                           | 1:1                                           |
| 2     | 1.6         | 39%                                          | 5:1                                                     | 3:1                                           | 1:1                                           |
| 3     | 2.0         | 42%                                          | 5:1                                                     | 3:1                                           | 1:1                                           |
| 4     | 2.4         | 53%                                          | 5:1                                                     | 3:1                                           | 1:1                                           |
| 5     | 2.8         | 63%                                          | 5:1                                                     | 3:1                                           | 1:1                                           |
| 6     | 3.2         | 64%                                          | 5:1                                                     | 3:1                                           | 1:1                                           |

<sup>a</sup> General conditions: **30** (1.0 mmol), *rac*-**C1** (1 mol%), (NH<sub>2</sub>OH)<sub>2</sub>·H<sub>2</sub>SO<sub>4</sub> (2.0 mmol), and AcOH (X mL) were dissolved in *t*-BuOH (2.0 mL), and then H<sub>2</sub>O<sub>2</sub> (5.0 equiv., 5.0 mmol, 567 μL, 30% wt. in H<sub>2</sub>O) in 2 mL of *t*-BuOH introduced with a syringe pump over 1 h under stirring at 0 °C; after stirring for an additional 0.5 h, the solution was quenched with Na<sub>2</sub>SO<sub>3</sub> and then basified with Na<sub>2</sub>CO<sub>3</sub> powder for 0.5 h at 0 °C; <sup>b</sup> yield, site selectivities and the ratio of *E/Z* determined by <sup>1</sup>H NMR of crude reaction mixture.

**Table S-5.** Screening manganese catalysts for oximation of (*E*)-hex-2-enoate (**50**)<sup>a</sup>

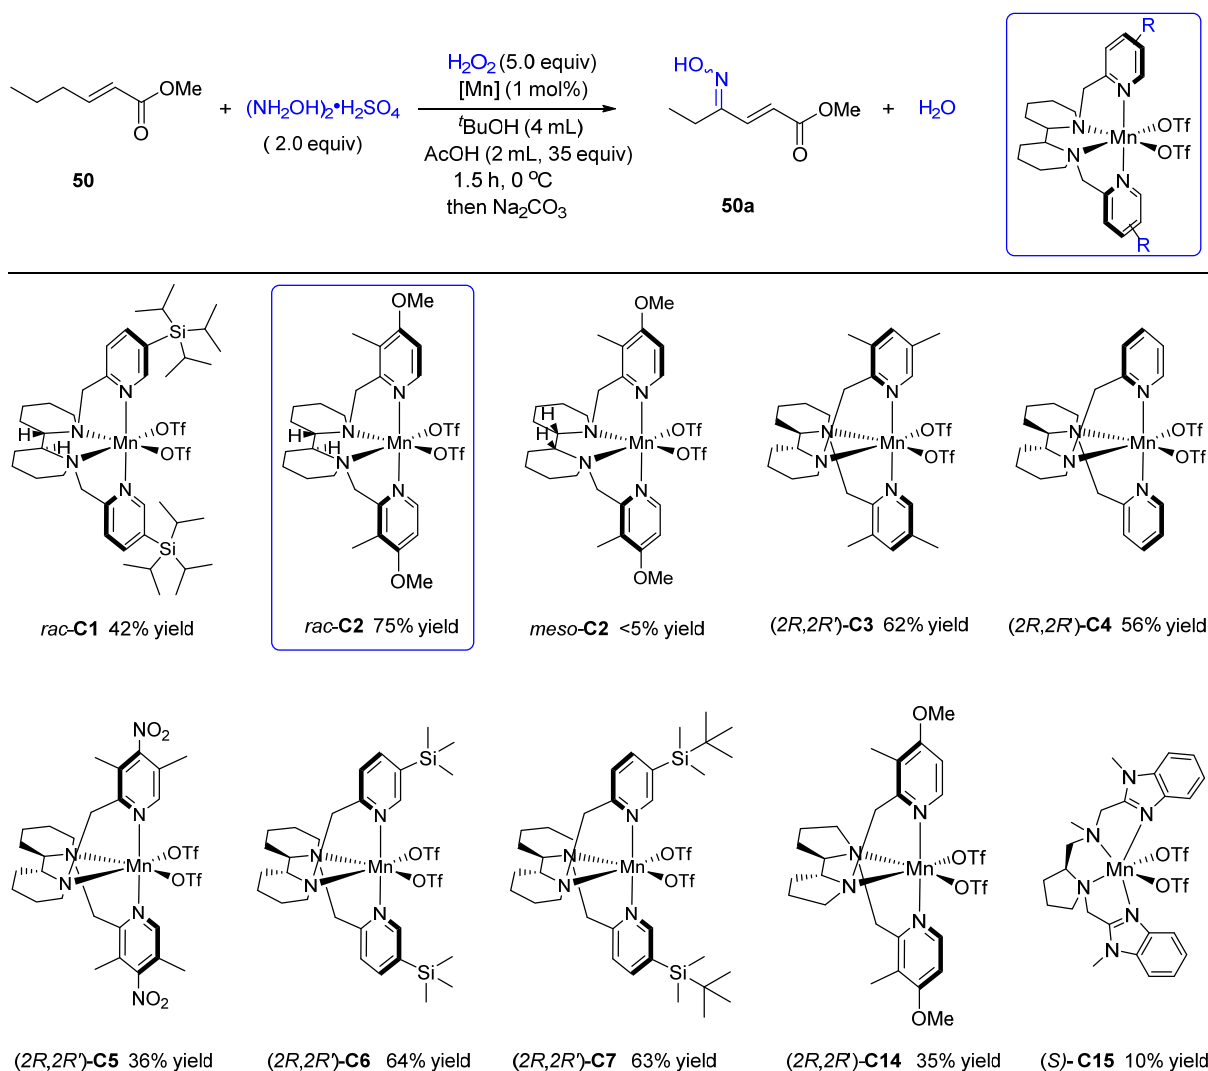

<sup>a</sup> General conditions: **50** (1 equiv., 1 mmol),  $(\text{NH}_2\text{OH})_2\cdot\text{H}_2\text{SO}_4$  (2 equiv., 2 mmol),  $[\text{Mn}]$  (1 mol%),  $t\text{BuOH}$  (2 mL), AcOH (2 mL), and  $\text{H}_2\text{O}_2$  (5 equiv., 5 mmol, 567  $\mu\text{L}$ , 30% wt. in  $\text{H}_2\text{O}$ ) in 2.0 mL of  $t\text{BuOH}$  introduced with a syringe pump over 1 h under stirring at 0 °C. After stirring for an additional 0.5 h, the solution was quenched with  $\text{Na}_2\text{SO}_3$  and then basified with  $\text{Na}_2\text{CO}_3$  powder for 0.5 h at 0 °C; isolated yields reported.

**Table S-6.** Optimization of conditions for oximation of (*E*)-hex-2-enoate (**50**)<sup>a</sup>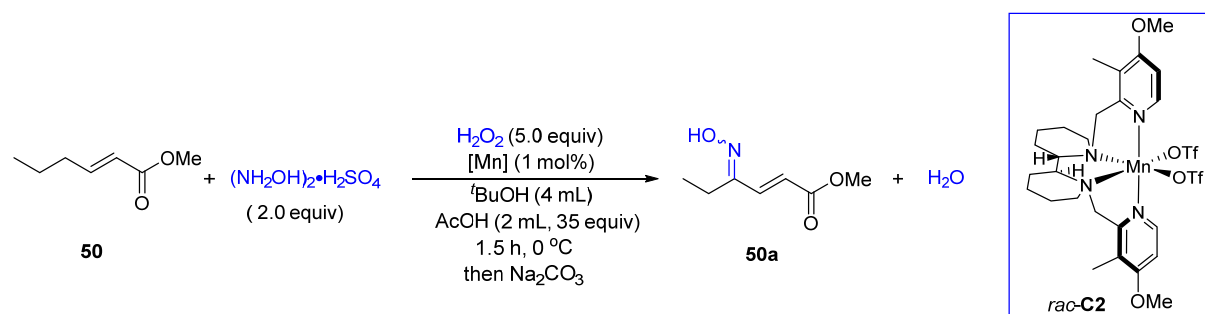

| Entry | <i>rac</i> - <b>C2</b><br>(X mol %) | $(\text{NH}_2\text{OH})_2\cdot\text{H}_2\text{SO}_4$<br>(m equiv.) | $\text{H}_2\text{O}_2$<br>(Y equiv) | <i>t</i> BuOH<br>(Z mL) | AcOH<br>(n mL) | Yield of <sup>b</sup><br><b>50a</b> (%) |
|-------|-------------------------------------|--------------------------------------------------------------------|-------------------------------------|-------------------------|----------------|-----------------------------------------|
| 1     | 1.0                                 | 2.0                                                                | 5.0                                 | 6                       | 0              | 35                                      |
| 2     | 1.0                                 | 2.0                                                                | 5.0                                 | 6                       | 0.5            | 54                                      |
| 3     | 1.0                                 | 2.0                                                                | 5.0                                 | 6                       | 1.0            | 62                                      |
| 4     | 1.0                                 | 2.0                                                                | 5.0                                 | 6                       | 1.5            | 70                                      |
| 5     | 1.0                                 | 2.0                                                                | 5.0                                 | 6                       | 2.0            | 75                                      |
| 6     | 1.0                                 | 2.0                                                                | 5.0                                 | 6                       | 2.5            | 61                                      |
| 7     | 1.0                                 | 2.0                                                                | 5.0                                 | 5                       | 2.0            | 80                                      |
| 8     | 1.0                                 | 2.0                                                                | 5.0                                 | 4                       | 2.0            | 83                                      |
| 9     | 1.0                                 | 2.0                                                                | 5.0                                 | 3                       | 2.0            | 82                                      |
| 10    | 1.0                                 | 2.0                                                                | 5.0                                 | 2                       | 2.0            | 79                                      |
| 11    | 1.0                                 | 2.0                                                                | 4.0                                 | 4                       | 2.0            | 67                                      |
| 12    | 1.0                                 | 2.0                                                                | 3.0                                 | 4                       | 2.0            | 59                                      |
| 13    | 1.0                                 | 2.0                                                                | 2.0                                 | 4                       | 2.0            | 56                                      |
| 14    | 1.0                                 | 2.0                                                                | 1.0                                 | 4                       | 2.0            | 30                                      |
| 15    | 1.0                                 | 1.0                                                                | 5.0                                 | 4                       | 2.0            | 30                                      |
| 16    | 1.0                                 | 1.5                                                                | 5.0                                 | 4                       | 2.0            | 56                                      |
| 17    | 1.0                                 | 3.0                                                                | 5.0                                 | 4                       | 2.0            | 59                                      |
| 18    | 0.5                                 | 2.0                                                                | 5.0                                 | 4                       | 2.0            | 64                                      |
| 19    | 1.5                                 | 2.0                                                                | 5.0                                 | 4                       | 2.0            | 80                                      |
| 20    | 2                                   | 2.0                                                                | 5.0                                 | 4                       | 2.0            | 83                                      |

<sup>a</sup> General conditions: **50** (1 equiv., 1 mmol),  $(\text{NH}_2\text{OH})_2\cdot\text{H}_2\text{SO}_4$  (2 equiv., 1 mmol), *rac*-**C2** (1 mol%), *t*BuOH ((Z-2) mL), AcOH (2 mL), and  $\text{H}_2\text{O}_2$  (5 equiv., 5 mmol, 567  $\mu\text{L}$ , 30% wt. in  $\text{H}_2\text{O}$ ) in 2.0 mL of *t*BuOH introduced with a syringe pump over 1 h with under stirring at 0 °C; after stirring for an additional 0.5 h, the solution was quenched with  $\text{Na}_2\text{SO}_3$  and then basified with  $\text{Na}_2\text{CO}_3$  powder for 0.5 h at 0 °C; <sup>b</sup> isolated yields.

**Table S-7.** Formation of epoxides in *rac*-**C2** catalyzed allylic C–H oxidation<sup>a</sup>

|                                                                              |                                                                                                                                          |                                                                              |
|------------------------------------------------------------------------------|------------------------------------------------------------------------------------------------------------------------------------------|------------------------------------------------------------------------------|
|                                                                              |                                                                                                                                          |                                                                              |
|                                                                              |                                                                                                                                          |                                                                              |
| <p><b>51b</b> 8% yield</p>                                                   | <p><b>55b</b> 20% yield</p>                                                                                                              | <p><b>56b</b> 29% yield</p>                                                  |
| <p><b>64a</b> 28% yield</p>                                                  | <p><b>66b</b> 34% yield</p>                                                                                                              | <p><b>115b</b> 34% yield<br/><i>dr</i> = 5:1 with (<i>R,R</i>)-<b>C2</b></p> |
| <p><b>117b</b> 28% yield<br/><i>dr</i> = 2:1 with (<i>R,R</i>)-<b>C2</b></p> | <p><b>118b</b> 34% yield, <i>dr</i> = 4:1 with (<i>R,R</i>)-<b>C2</b><br/>47% yield, <i>dr</i> &gt; 99:1 with (<i>S,S</i>)-<b>C2</b></p> | <p><b>119b</b> 8% yield<br/><i>dr</i> = 2:1 with (<i>R,R</i>)-<b>C2</b></p>  |

<sup>a</sup> General conditions: alkene (1 equiv., 1 mmol), (NH<sub>2</sub>OH)<sub>2</sub>•H<sub>2</sub>SO<sub>4</sub> (2 equiv., 1 mmol), *rac*-**C2** (1 mol%), <sup>t</sup>BuOH (2 mL), AcOH (2 mL), H<sub>2</sub>O<sub>2</sub> (5 equiv., 5 mmol, 567  $\mu$ L, 30% wt. in H<sub>2</sub>O) in 2.0 mL of <sup>t</sup>BuOH introduced with a syringe pump over 1 h under stirring at 0 °C. After stirring for an additional 0.5 h, the solution was quenched with Na<sub>2</sub>SO<sub>3</sub> and then basified with Na<sub>2</sub>CO<sub>3</sub> powder for 0.5 h at 0 °C; isolated yields. Only those showing yields >5% are reported.



**Table S-8.** Screening manganese catalysts for oximation of ethylbenzene<sup>a</sup>

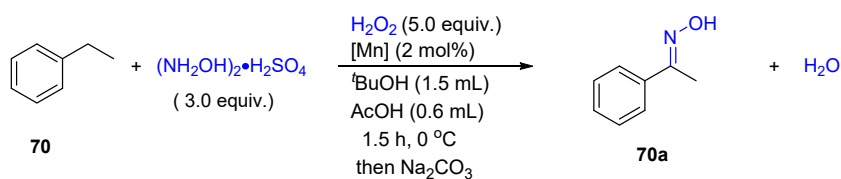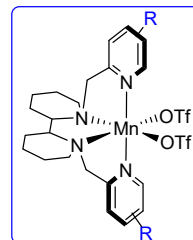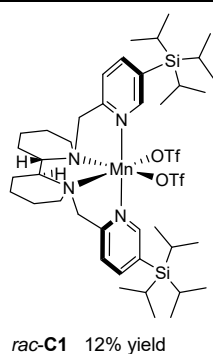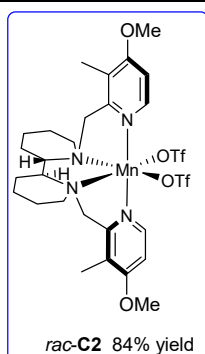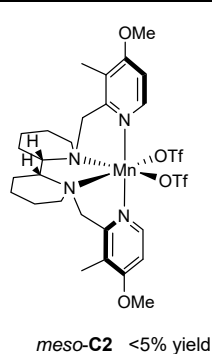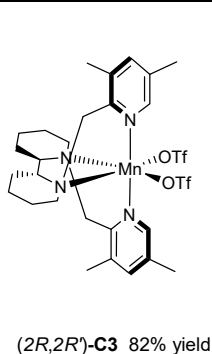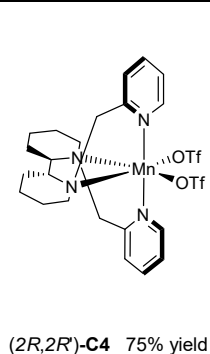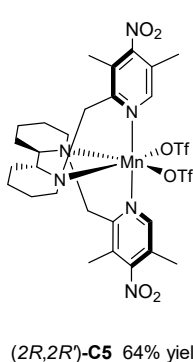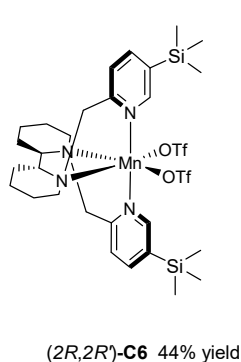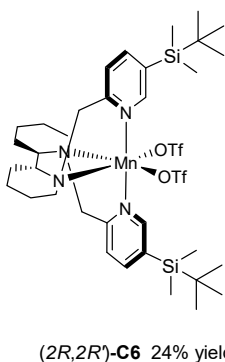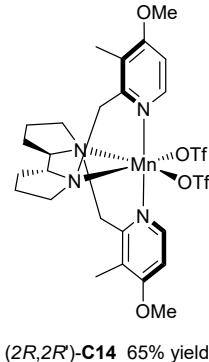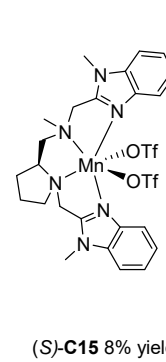

<sup>a</sup> General conditions: **70** (1 equiv., 0.5 mmol), (NH<sub>2</sub>OH)<sub>2</sub>·H<sub>2</sub>SO<sub>4</sub> (3 equiv., 1 mmol), [Mn] (2 mol%), <sup>t</sup>BuOH (1.0 mL), AcOH (0.6 mL), and H<sub>2</sub>O<sub>2</sub> (5 equiv., 2.5 mmol, 284  $\mu$ L, 30% wt. in H<sub>2</sub>O) in 0.5 mL of <sup>t</sup>BuOH introduced with a syringe pump over 1 h under stirring at 0 °C. After stirring for an additional 0.5 h, the solution was quenched with Na<sub>2</sub>SO<sub>3</sub> and then basified with Na<sub>2</sub>CO<sub>3</sub> powder for 0.5 h at 50 °C; yield determined by <sup>1</sup>H NMR of crude reaction mixture.

**Table S-9.** Optimization of conditions for oximation of ethylbenzene<sup>a</sup>

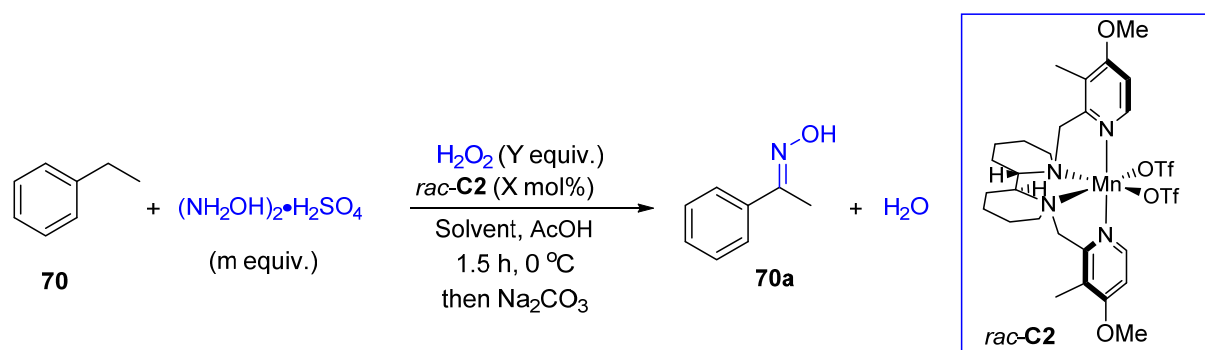

| Entry | <i>rac-C2</i><br>(X mol %) | $(\text{NH}_2\text{OH})_2\cdot\text{H}_2\text{SO}_4$<br>(m equiv.) | $\text{H}_2\text{O}_2$<br>(Y equiv) | Solvent<br>(Z ml)                       | AcOH<br>(n mL) | Yield of<br><b>71a</b> (%) |
|-------|----------------------------|--------------------------------------------------------------------|-------------------------------------|-----------------------------------------|----------------|----------------------------|
| 1     | 2.0                        | 3.0                                                                | 5.0                                 | <sup>t</sup> BuOH(1.5)                  | 0.2            | 63                         |
| 2     | 2.0                        | 3.0                                                                | 5.0                                 | <sup>t</sup> BuOH(1.5)                  | 0.4            | 67                         |
| 3     | 2.0                        | 3.0                                                                | 5.0                                 | <sup>t</sup> BuOH(1.5)                  | 0.6            | 84                         |
| 4     | 2.0                        | 3.0                                                                | 5.0                                 | <sup>t</sup> BuOH(1.5)                  | 0.5            | 81                         |
| 5     | 2.0                        | 3.0                                                                | 5.0                                 | <sup>t</sup> BuOH(1.5)                  | 1.0            | 82                         |
| 6     | 2.0                        | 3.0                                                                | 5.0                                 | <sup>t</sup> BuOH(1.0)                  | 0.5            | 51                         |
| 7     | 2.0                        | 3.0                                                                | 5.0                                 | <sup>t</sup> BuOH(2.0)                  | 0.5            | 77                         |
| 8     | 2.0                        | 3.0                                                                | 5.0                                 | <sup>t</sup> BuOH(3.0)                  | 0.5            | 67                         |
| 9     | 2.0                        | 3.0                                                                | 5.0                                 | MeOH(1.5)                               | 0.5            | /                          |
| 10    | 2.0                        | 3.0                                                                | 5.0                                 | $\text{CF}_3\text{CH}_2\text{OH}$ (1.5) | 0.5            | /                          |
| 11    | 2.0                        | 3.0                                                                | 4.0                                 | $\text{CH}_3\text{CN}$ (1.5)            | 0.5            | 65                         |
| 12    | 2.0                        | 3.0                                                                | 6.0                                 | <sup>t</sup> BuOH(1.5)                  | 0.5            | 78                         |
| 13    | 2.0                        | 1.0                                                                | 5.0                                 | <sup>t</sup> BuOH(1.5)                  | 0.5            | 25                         |
| 14    | 2.0                        | 2.0                                                                | 5.0                                 | <sup>t</sup> BuOH(1.5)                  | 0.5            | 69                         |
| 15    | 2.0                        | 4.0                                                                | 5.0                                 | <sup>t</sup> BuOH(1.5)                  | 0.5            | 79                         |
| 16    | 2.0                        | 5.0                                                                | 5.0                                 | <sup>t</sup> BuOH(1.5)                  | 0.5            | 26                         |
| 17    | 1.0                        | 3.0                                                                | 5.0                                 | <sup>t</sup> BuOH(1.5)                  | 0.5            | 76                         |
| 18    | 4.0                        | 3.0                                                                | 5.0                                 | <sup>t</sup> BuOH(1.5)                  | 0.5            | 69                         |

<sup>a</sup> General conditions: **70** (1 equiv., 0.5 mmol),  $(\text{NH}_2\text{OH})_2\cdot\text{H}_2\text{SO}_4$  (m equiv.), *rac-C2* (X mol%), solvent (1 mL), AcOH (n mL), and  $\text{H}_2\text{O}_2$  (Y equiv., 30% wt. in  $\text{H}_2\text{O}$ ) in 0.5 mL of <sup>t</sup>BuOH introduced with a syringe pump over 1 h under stirring at 0 °C; after stirring for an additional 0.5 h, the solution was quenched with  $\text{Na}_2\text{SO}_3$  and then basified with  $\text{Na}_2\text{CO}_3$  powder for 0.5 h at 50 °C; yield determined by <sup>1</sup>H NMR of crude reaction mixture.

**Table S-10.** Effect of electron-withdrawing group on the selectivity of oximation of alkyl esters<sup>a</sup>

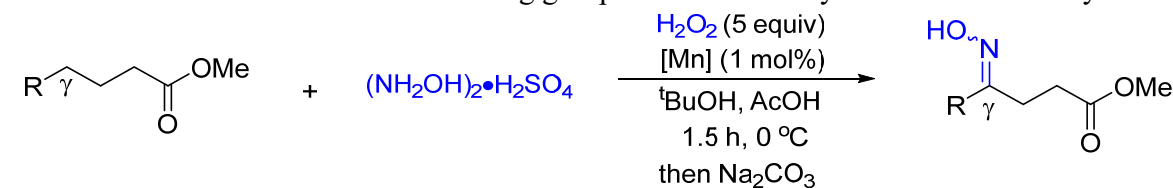

R=Me, **single** oxime product:  $\gamma$ ;

R=n-Pr, **three** oxime products:  $\gamma$ ,  $\delta$ ,  $\epsilon$ ;

R=n-Am, **five** oxime products:  $\gamma$ ,  $\delta$ ,  $\epsilon$ ,  $\zeta$ ,  $\eta$ ;

R=Et, **two** oxime products:  $\gamma$ ,  $\delta$

R=n-Bu, **four** oxime products:  $\gamma$ ,  $\delta$ ,  $\epsilon$ ,  $\zeta$

R=n-Hex, **six** oxime products:  $\gamma$ ,  $\delta$ ,  $\epsilon$ ,  $\zeta$ ,  $\eta$ ,  $\theta$

| Entry | Substrate  | Product                                                                                                                              | Yield of product                                                             |
|-------|------------|--------------------------------------------------------------------------------------------------------------------------------------|------------------------------------------------------------------------------|
| 1     | <b>27</b>  | <b>27a-<math>\gamma</math></b>                                                                                                       | 48%                                                                          |
| 2     | <b>30</b>  | <b>30a-(<math>\gamma</math>+<math>\delta</math>)</b>                                                                                 | 63% ( $\gamma/\delta = 1:5$ )                                                |
| 3     | <b>44</b>  | <b>44a-(<math>\gamma</math>+<math>\delta</math>+<math>\epsilon</math>)</b>                                                           | 63% ( $\gamma/\delta/\epsilon = 0.3:2:5$ )                                   |
| 4     | <b>123</b> | <b>123a-(<math>\gamma</math>+<math>\delta</math>+<math>\epsilon</math>+<math>\zeta</math>)</b>                                       | $\zeta$ : 35%, ( $\gamma$ + $\delta$ + $\epsilon$ ): 34%                     |
| 5     | <b>124</b> | <b>124a-(<math>\gamma</math>+<math>\delta</math>+<math>\epsilon</math>+<math>\zeta</math>+<math>\eta</math>)</b>                     | $\eta$ : 20%, ( $\gamma$ + $\delta$ + $\epsilon$ + $\zeta$ ): 40%            |
| 6     | <b>125</b> | <b>125a-(<math>\gamma</math>+<math>\delta</math>+<math>\epsilon</math>+<math>\zeta</math>+<math>\eta</math>+<math>\theta</math>)</b> | $\theta$ : 21%, ( $\gamma$ + $\delta$ + $\epsilon$ + $\zeta$ + $\eta$ ): 43% |

<sup>a</sup> General conditions: alkyl ester (1 equiv., 1.0 mmol), (NH<sub>2</sub>OH)<sub>2</sub>•H<sub>2</sub>SO<sub>4</sub> (2 equiv. 2.0 mmol), *rac*-C1 (10.1 mg, 1 mol%), tBuOH (2 mL), AcOH (2.8 mL), and H<sub>2</sub>O<sub>2</sub> (5 equiv., 5.0 mmol, 567  $\mu$ L, 30% wt. in H<sub>2</sub>O) in 2 mL of tBuOH introduced with a syringe pump over 1 h under stirring at 0 °C. After stirring for an additional 0.5 h, the solution was quenched with Na<sub>2</sub>SO<sub>3</sub> and then basified with Na<sub>2</sub>CO<sub>3</sub> powder for 0.5 h at 0 °C; isolated yields. Site selectivity was determined by integration of <sup>1</sup>H and <sup>13</sup>C NMR spectra of isolated mixture products. In all cases, the products refer to mono-oximated compounds.

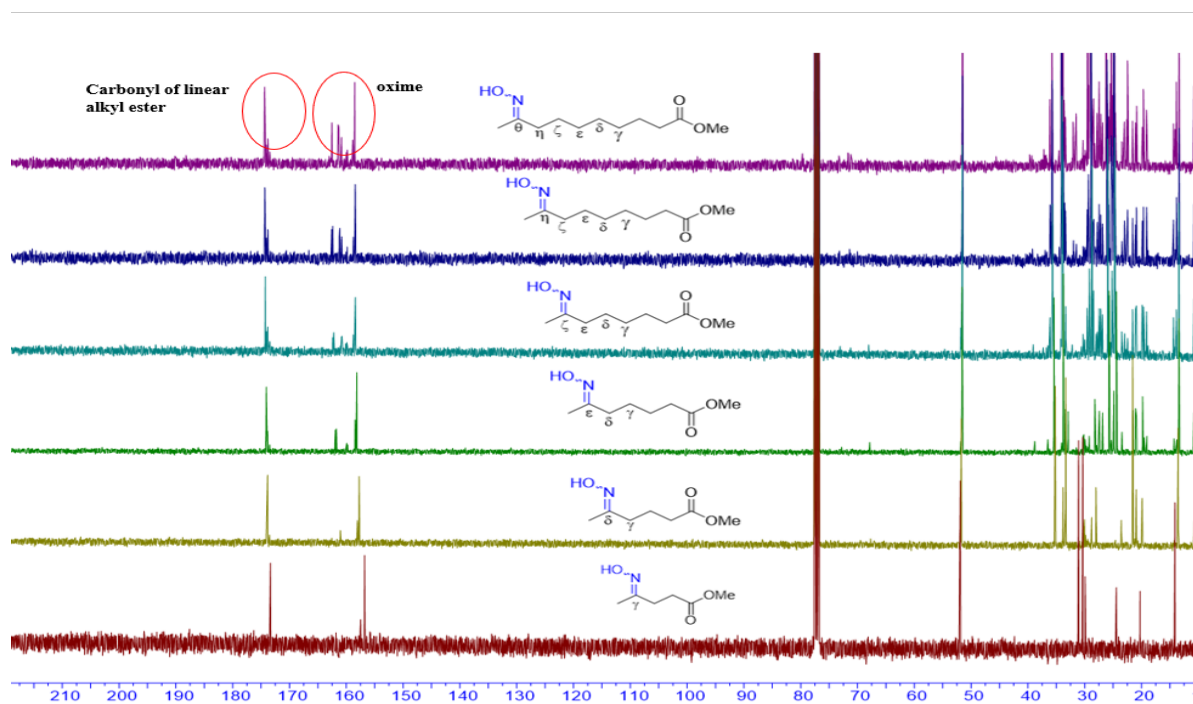

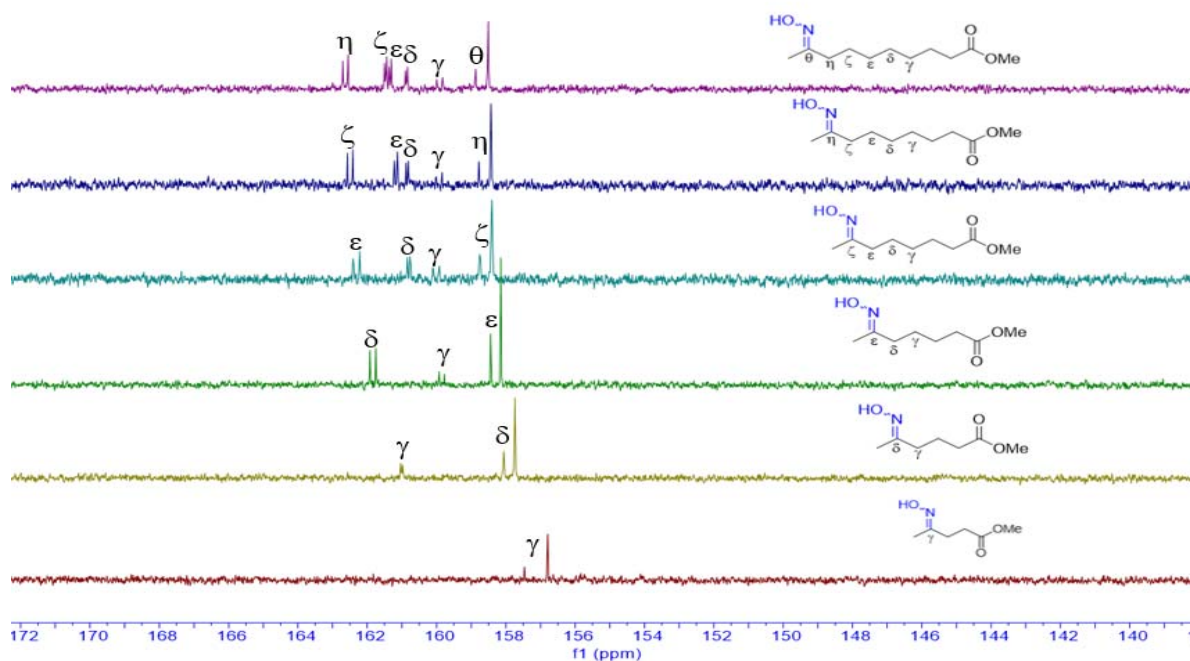

**Figure S-6.**  $^{13}\text{C}$  NMR spectra of products from the oximation of alkyl esters.

**Table S-11.** Catalyst-controlled site selectivity of the oximation of sclareolide<sup>a</sup>

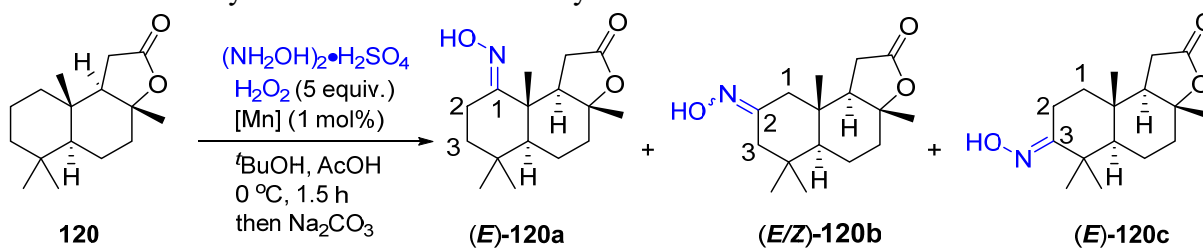

| Entry | Catalyst          | <i>E</i> -120a (%) | <i>E</i> -120b (%) | <i>Z</i> -120b (%) | <i>E</i> -120c (%) | 120a/120b /120c | Remaining 120 (%) |
|-------|-------------------|--------------------|--------------------|--------------------|--------------------|-----------------|-------------------|
| 1     | <i>Rac</i> -C1    | 6                  | 22                 | 24                 | 7                  | 1:7.7:1.2       | 35                |
| 2     | ( <i>R,R</i> )-C1 | 6                  | 18                 | 24                 | 6                  | 1:7:1           | 42                |
| 3     | ( <i>S,S</i> )-C1 | 4                  | 28                 | 28                 | 7                  | 1:14:1.8        | 26                |
| 4     | ( <i>R,R</i> )-C2 | 7                  | 22                 | 19                 | 7                  | 1:5.9:1         | 39                |
| 5     | ( <i>S,S</i> )-C2 | 10                 | 31                 | 26                 | 9                  | 1:5.7:0.9       | 17                |

<sup>a</sup> General conditions: **120** (1 equiv., 1.0 mmol),  $(\text{NH}_2\text{OH})_2\cdot\text{H}_2\text{SO}_4$  (2 equiv. 2.0 mmol),  $[\text{Mn}]$  (1 mol%),  $t\text{BuOH}$  (2 mL),  $\text{AcOH}$  (2.8 mL), and  $\text{H}_2\text{O}_2$  (5 equiv., 5.0 mmol, 567  $\mu\text{L}$ , 30% wt. in  $\text{H}_2\text{O}$ ) in 2 mL of  $t\text{BuOH}$  introduced with a syringe pump over 1 h under stirring at 0 °C; after stirring for an additional 0.5 h, the solution was quenched with  $\text{Na}_2\text{SO}_3$  and then basified with  $\text{Na}_2\text{CO}_3$  powder for 0.5 h at 0 °C; isolated yield. Site selectivity was calculated based on the quantity of isolated yields. The structures of *E*-120a and *Z*-120c were assigned based on the X-ray diffraction.

**Table S-12.** Optimization conditions for oximation of methyl dehydroabietate<sup>a</sup>

| Entry | catalyst          | Basification (time, h) | 121a (%) | 121b (%) | Remaining (%) |
|-------|-------------------|------------------------|----------|----------|---------------|
| 1     | ( <i>R,R</i> )-C2 | 0.5 h                  | 19       | 26       | 29            |
| 2     | ( <i>R,R</i> )-C2 | no basification, 20h   | 18       | 29       | 29            |
| 3     | ( <i>R,R</i> )-C2 | 20 h                   | 42       | 9        | 30            |
| 4     | ( <i>S,S</i> )-C2 | 20 h                   | 41       | 15       | 12            |

<sup>a</sup> General conditions: **121** (1 equiv., 0.5 mmol), (NH<sub>2</sub>OH)<sub>2</sub>•H<sub>2</sub>SO<sub>4</sub> (3 equiv. 1.5 mmol), [Mn] (1 mol%), <sup>t</sup>BuOH (2 mL), AcOH (0.6 mL), and H<sub>2</sub>O<sub>2</sub> (5 equiv., 2.5 mmol, 284 uL, 30% wt. in H<sub>2</sub>O) in 2 mL of <sup>t</sup>BuOH introduced with a syringe pump over 1 h under stirring at 0 °C; after stirring for an additional 0.5 h, the solution was quenched with Na<sub>2</sub>SO<sub>3</sub> and then basified with Na<sub>2</sub>CO<sub>3</sub> powder for 0.5 h at 50 °C; isolated yield.

**Table S-13.** Catalyst-controlled site-selectivity of the oximation of (+)-artemisinin<sup>a</sup>

| Entry          | Catalyst          | Solvent            | No. of recycling<br>122 | Yield of<br>122a (mg, %) | Yield<br>of 122b | Remaini ng<br>122 (mg, %) |
|----------------|-------------------|--------------------|-------------------------|--------------------------|------------------|---------------------------|
| 1              | ( <i>R,R</i> )-C1 | <sup>t</sup> BuOH  | 0                       | 17 mg, 11%               | trace            | 121.6 mg, 86%             |
| 2              | ( <i>S,S</i> )-C1 | <sup>t</sup> BuOH  | 0                       | Mixture products         |                  | /                         |
| 3              | ( <i>S,S</i> )-C1 | CH <sub>3</sub> CN | 0                       | Mixture products         |                  | /                         |
| 4              | ( <i>R,R</i> )-C2 | <sup>t</sup> BuOH  | 0                       | 3 mg, 2%                 | trace            | 136.0 mg, 96%             |
| 5 <sup>b</sup> | (R,R)-C1          | CH <sub>3</sub> CN | 0                       | 35.6 mg, 23%             | trace            | 101.2 mg, 72%             |
|                |                   |                    | 1                       | 31.2 mg, 20%             | trace            | 65.3 mg, 46%              |
|                |                   |                    | 2                       | 20.2 mg, 13%             | trace            | 37.2 mg, 26%              |
|                |                   |                    | overall                 | 87.0 mg, 56%             | trace            | 37.2 mg, 26%              |

<sup>a</sup> General conditions: **122** (1 equiv., 0.5 mmol), (NH<sub>2</sub>OH)<sub>2</sub>•H<sub>2</sub>SO<sub>4</sub> (2 equiv. 1.0 mmol), [Mn] (1 mol%), <sup>t</sup>BuOH (1 mL), AcOH (1.4 mL), and H<sub>2</sub>O<sub>2</sub> (5 equiv., 2.5 mmol, 284 uL, 30% wt. in H<sub>2</sub>O) in 1 mL of <sup>t</sup>BuOH introduced with a syringe pump over 1 h under stirring for at 0 °C; after stirring for an additional 0.5 h, the solution was quenched with Na<sub>2</sub>SO<sub>3</sub> and then basified with Na<sub>2</sub>CO<sub>3</sub> powder for 0.5 h at 0 °C; isolated yield. <sup>b</sup> Starting material was recycled twice.

## 6. Mechanistic studies

### 6.1 Effect of $(\text{NH}_2\text{OH})_2\cdot\text{H}_2\text{SO}_4$ on the *rac*-C1 catalyzed oximation of cyclododecane

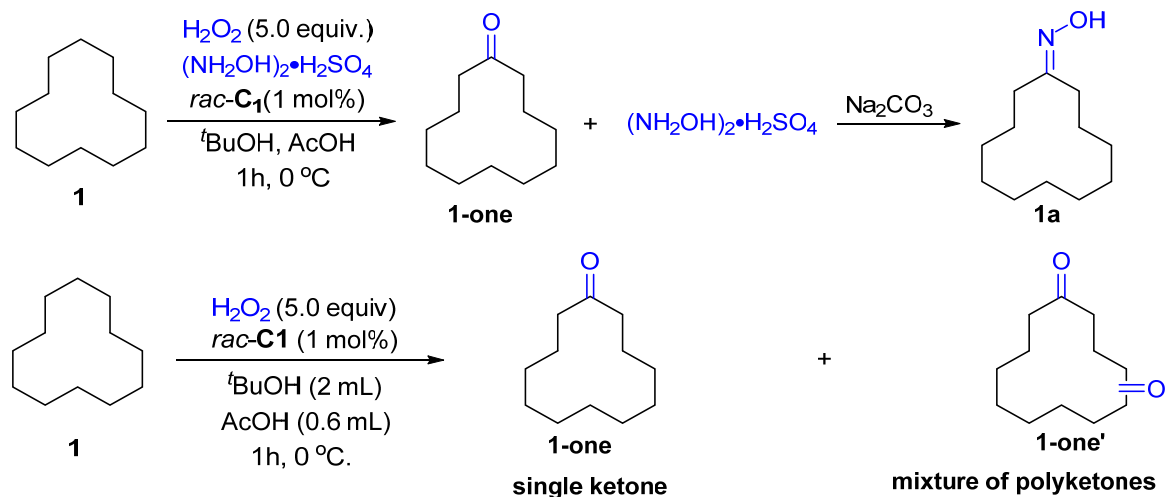

**With  $(\text{NH}_2\text{OH})_2\cdot\text{H}_2\text{SO}_4$ :** *rac*-C1 (5.1 mg, 1.0 mol%), hydroxylamine sulfate (164.2 mg, 1.0 mmol, 2.0 equiv.), cyclododecane (84.2 mg, 0.5 mmol, 1.0 equiv.),  $\text{AcOH}$  (0.6 mL) and  $t\text{BuOH}$  (1.0 mL) were added to a reaction tube. The mixture was cooled down to  $0\text{ }^\circ\text{C}$  in a cryogenic bath, and then  $\text{H}_2\text{O}_2$  (2.5 mmol, 5.0 equiv., 284  $\mu\text{L}$ , 30% wt. in  $\text{H}_2\text{O}$ , dropping rate: 0.02 mL/min) in 1 mL of  $t\text{BuOH}$  was added dropwise with a syringe pump over a certain period of time under stirring at  $0\text{ }^\circ\text{C}$  without nitrogen protection. After stirring for an additional 0.5 h, the reaction solution was quenched with  $\text{Na}_2\text{SO}_3$  solid. And then, the mixture was basified with  $\text{Na}_2\text{CO}_3$  for 30 minutes at room temperature, filtered and washed with  $\text{DCM}$  (2.0 mL). The yield was determined by  $^1\text{H}$  NMR of the crude reaction mixture. The same reaction was repeated but stopped to add  $\text{H}_2\text{O}_2$  after a different period of time (Yield variation with time is shown in Table S-14).

**Without  $(\text{NH}_2\text{OH})_2\cdot\text{H}_2\text{SO}_4$ :** The procedure was the same as the above except without  $(\text{NH}_2\text{OH})_2\cdot\text{H}_2\text{SO}_4$ . Yield determined by  $^1\text{H}$  and  $^{13}\text{C}$  NMR analysis of the crude reaction mixture with 1,3,5-trimethoxybenzene as internal standard (Yield variation with is shown in Table S-14).

The data obtained are also graphically shown in Figure S-7.

**Table S-14.** Oxidative of cyclododecane **1** with or without (NH<sub>2</sub>OH)<sub>2</sub>•H<sub>2</sub>SO<sub>4</sub><sup>a</sup>

| Entry | Amount of (NH <sub>2</sub> OH) <sub>2</sub> •SO <sub>4</sub> | Time (min) | Conversion (%) | Yield of <b>1a</b> (%) | Yield of <b>1-one</b> (%) | Yield of <b>1-one'</b> (%) <sup>b</sup> |
|-------|--------------------------------------------------------------|------------|----------------|------------------------|---------------------------|-----------------------------------------|
| 1     | 0 equiv                                                      | 10         | 18             | /                      | 18                        | 0                                       |
| 2     | 0 equiv.                                                     | 20         | 33             | /                      | 33                        | 0                                       |
| 3     | 0 equiv.                                                     | 30         | 57             | /                      | 52                        | 5                                       |
| 4     | 0 equiv.                                                     | 40         | >99            | /                      | 75                        | 22                                      |
| 5     | 0 equiv.                                                     | 50         | >99            | /                      | 50                        | 36                                      |
| 6     | 0 equiv.                                                     | 60         | >99            | /                      | 54                        | 45                                      |
| 7     | 0 equiv.                                                     | 70         | >99            | /                      | 46                        | 54                                      |
| 8     | 2 equiv.                                                     | 10         | 5              | 5                      | /                         | /                                       |
| 9     | 2 equiv.                                                     | 20         | 31             | 31                     | /                         | /                                       |
| 10    | 2 equiv.                                                     | 30         | 45             | 45                     | /                         | /                                       |
| 11    | 2 equiv.                                                     | 40         | 54             | 54                     | /                         | /                                       |
| 12    | 2 equiv.                                                     | 50         | 65             | 65                     | /                         | /                                       |
| 13    | 2 equiv.                                                     | 60         | 74             | 74                     | /                         | /                                       |
| 14    | 2 equiv.                                                     | 70         | 87             | 87                     | /                         | /                                       |

<sup>a</sup> General conditions: **1** (1 equiv., 0.5 mmol), (NH<sub>2</sub>OH)<sub>2</sub>•H<sub>2</sub>SO<sub>4</sub> (shown in table), *rac*-C1 (1 mol%), <sup>t</sup>BuOH (1 mL), AcOH (0.6 mL), and H<sub>2</sub>O<sub>2</sub> (5 equiv., 2.5 mmol, 284  $\mu$ L, 30% wt. in H<sub>2</sub>O, dropping rate: 0.02 mL/min) in 1 mL of <sup>t</sup>BuOH introduced with a syringe pump over the time indicated under stirring at 0 °C; after stirring for an additional 0.5 h, the solution was quenched with Na<sub>2</sub>SO<sub>3</sub> and then basified with Na<sub>2</sub>CO<sub>3</sub> powder for 0.5 h at 0 °C; yield determined by <sup>1</sup>H NMR of crude reaction mixture. <sup>b</sup> **1-one'** refers to polyketones with yields calculated from the yield of **1-one** and remaining **1**.

a. Time course of formation of cyclododecane oxime with (NH<sub>2</sub>OH)<sub>2</sub>•H<sub>2</sub>SO<sub>4</sub>

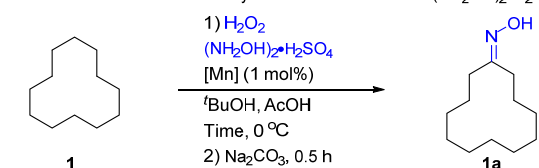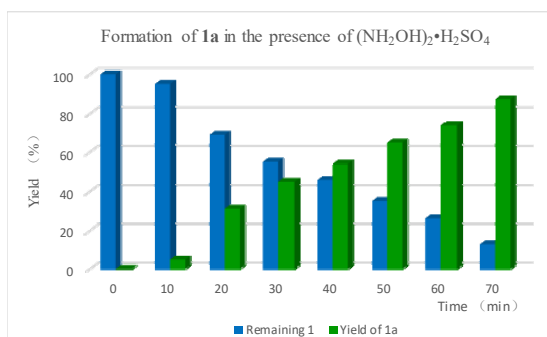

b. Time course of formation of cyclododecane without (NH<sub>2</sub>OH)<sub>2</sub>•H<sub>2</sub>SO<sub>4</sub>

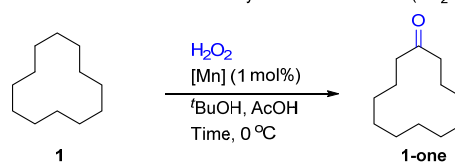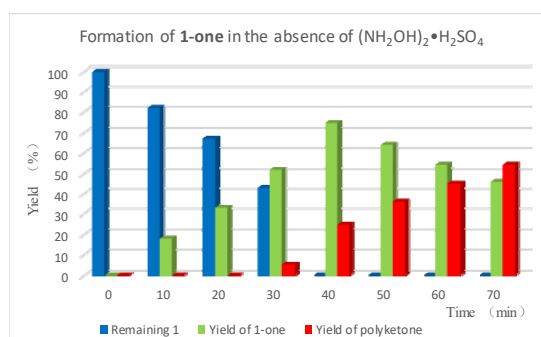**Figure S-7.** Time course of oxidation cyclododecane **1** with or without (NH<sub>2</sub>OH)<sub>2</sub>•H<sub>2</sub>SO<sub>4</sub>

## 6.2 Examination of the possibility of formation $(1a)_2 \cdot H_2SO_4$ salt from cyclododecanone in the oximation of cyclododecane with $(NH_2OH)_2 \cdot H_2SO_4$

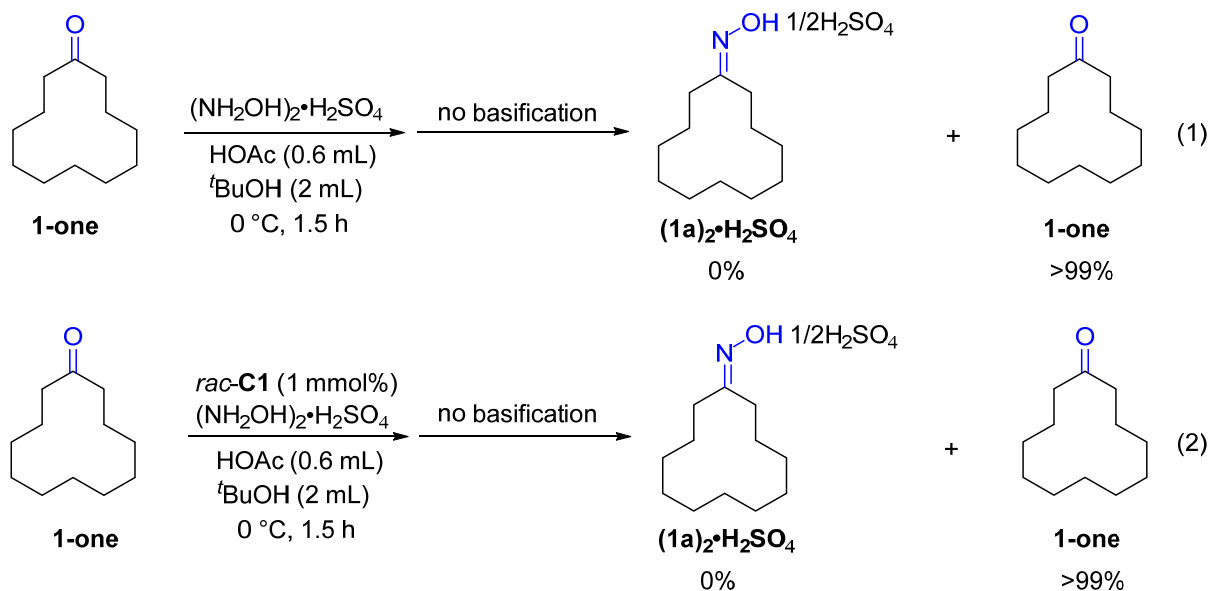

**Eq. 1:** In a reaction tube, cyclododecanone (91.2 mg, 0.5 mmol) and hydroxylamine sulfate (164.2 mg, 1.0 mmol, 2.0 equiv.) were added to a mixed solvent of AcOH (0.6 mL) and  $tBuOH$  (2 mL). After stirring for 1.5 hours, the reaction solution was filtered and washed with DCM. The collected solution was concentrated under reduced pressure to produce the crude product. The crude product was measured by  $^1H$  and  $^{13}C$  NMR. No  $(1a)_2 \cdot H_2SO_4$  salt was observed under this condition.

**Eq. 2:** The reaction condition was the same as in Eq. 1 but with  $rac-C1$  (5.1 mg, 1mol%) added. No  $(1a)_2 \cdot H_2SO_4$  salt was observed under this condition.

These reactions indicate that cyclododecanone does not convert to the sulfate salt of cyclododecanone oxime during the oxidation and it does not react with hydroxylamine sulfate in the absence of a base.



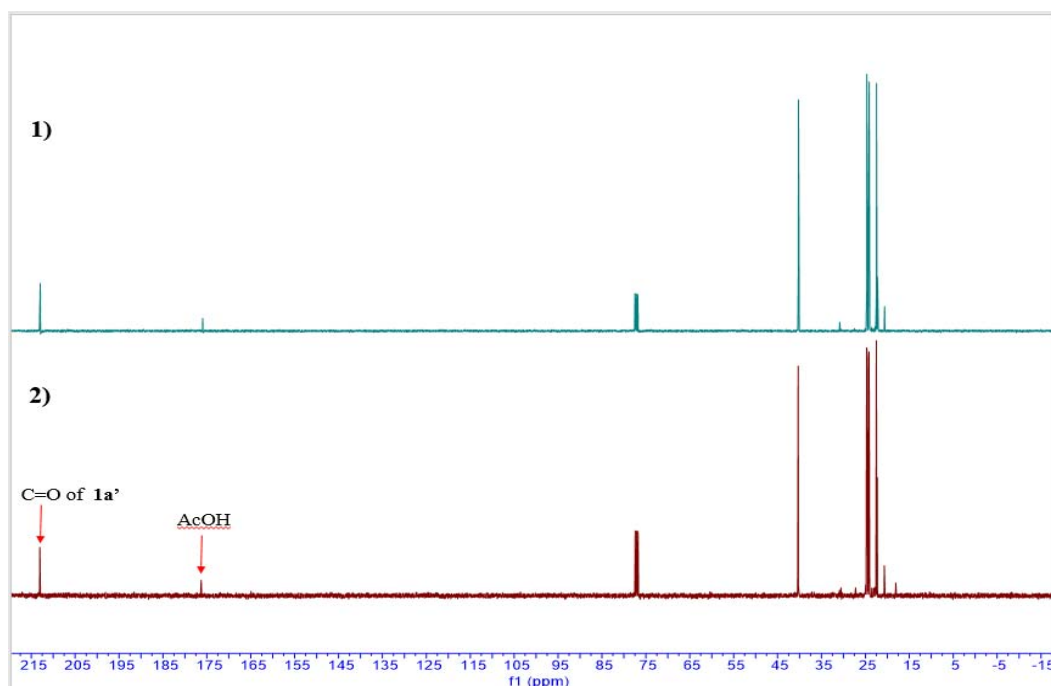

**Figure S-8.**  $^{13}\text{C}$  NMR of the mixture of cyclododecanone and  $(\text{NH}_2\text{OH})_2\cdot\text{H}_2\text{SO}_4$  (The numbers refer to the equations 1 and 2 above)

### 6.3. Formation of cyclododecone oxime by mixing cyclododecone with hydroxylamine sulfate

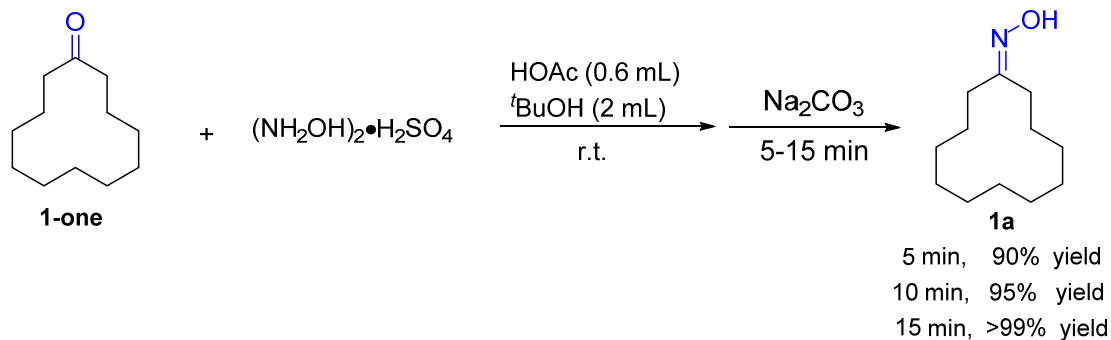

In a reaction tube, cyclododecanone (91.2 mg, 0.5 mmol) and hydroxylamine sulfate (164.2 mg, 1.0 mmol, 2.0 equiv.) were added to a mixed solvent of AcOH (0.6 mL) and  $t\text{BuOH}$  (2 mL). After briefly (<1 min) shaking the solution, the resulting mixture was basified with  $\text{Na}_2\text{CO}_3$  for about 5 minutes at room temperature. Then, water (10.0 mL) was added, and the solution was extracted with DCM ( $3 \times 15.0$  mL). The combined organic phase was dried over anhydrous  $\text{Na}_2\text{SO}_4$  and concentrated under reduced pressure to produce the crude product. The reaction was repeated under the same conditions except with a longer time of basification (10 and 15 min). Yields were determined by  $^1\text{H}$  NMR of the crude reaction mixture.

#### 6.4. Isolation of cyclododecaneone in the oximation of cyclododecane

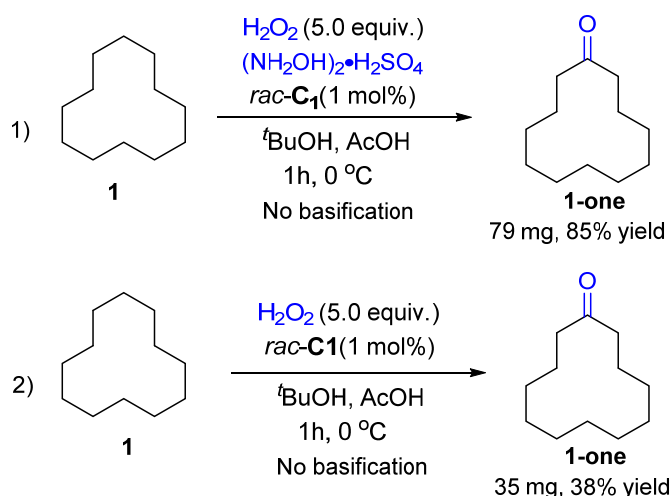

1) The reaction was carried out under the standard conditions (Section 9, procedure A), but without the basification step. The resulting mixture was evaporated to partially remove AcOH under reduced pressure to produce the crude product, and the residue was purified through flash column chromatography (gradient elution: petroleum ether : EtOAc= 30:1 to 10:1, then 3:1) to give cyclododecanone (**1-one**, 79 mg, 85% yield).

2) The reaction was carried out under the standard conditions (Section 9, procedure A), but without (NH<sub>2</sub>OH)<sub>2</sub>·H<sub>2</sub>SO<sub>4</sub>. Cyclododecanone was isolated from the mixture of ketones (**1-one**, 35 mg, 38% yield).

#### 6.5 Oximation of cyclododecane with NH<sub>2</sub>OH in the presence/absence of sulfuric acid

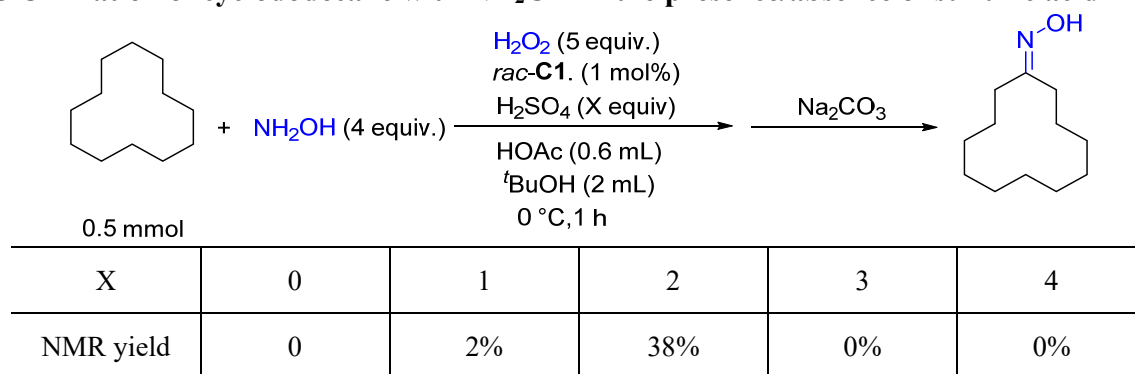

In a reaction tube, *rac*-**C1** (5.1 mg, 1mol%) and cyclododecane (84.2 mg, 0.5 mmol) were dissolved in the mixed solvent of AcOH (0.6 mL) and *t*BuOH (1 mL); then, NH<sub>2</sub>OH (2 mmol, 4 equiv., 50 wt.% in H<sub>2</sub>O) and H<sub>2</sub>SO<sub>4</sub> (0–2 mmol, 0–4 equiv., 98 wt.%) were added to the mixed solvent. The mixture was cooled down to 0 °C in a cryogenic bath, and then H<sub>2</sub>O<sub>2</sub> (2.5 mmol, 5.0

equiv.) in 1 mL of  $t$ BuOH was added dropwise with a syringe pump over 1 h under stirring at 0 °C without nitrogen protection. The reaction mixture was stirred for another 30 min, and then quenched with  $\text{Na}_2\text{SO}_3$  solid. Next, the resulting mixture was basified with  $\text{Na}_2\text{CO}_3$  for about 30 minutes at room temperature. After completion of the reaction, water (5.0 mL) was added, and the reaction solution was extracted with DCM ( $3 \times 15.0$  mL). The combined organic phase was dried over anhydrous  $\text{Na}_2\text{SO}_4$  and concentrated under reduced pressure to produce the crude product. Yields determined by  $^1\text{H}$  NMR of crude reaction mixture.

#### 6.6. Effect of $(\text{NH}_2\text{OH})_2 \cdot \text{H}_2\text{SO}_4$ on the *rac*-C2 catalyzed oximation of (*E*)-hex-2-enoate

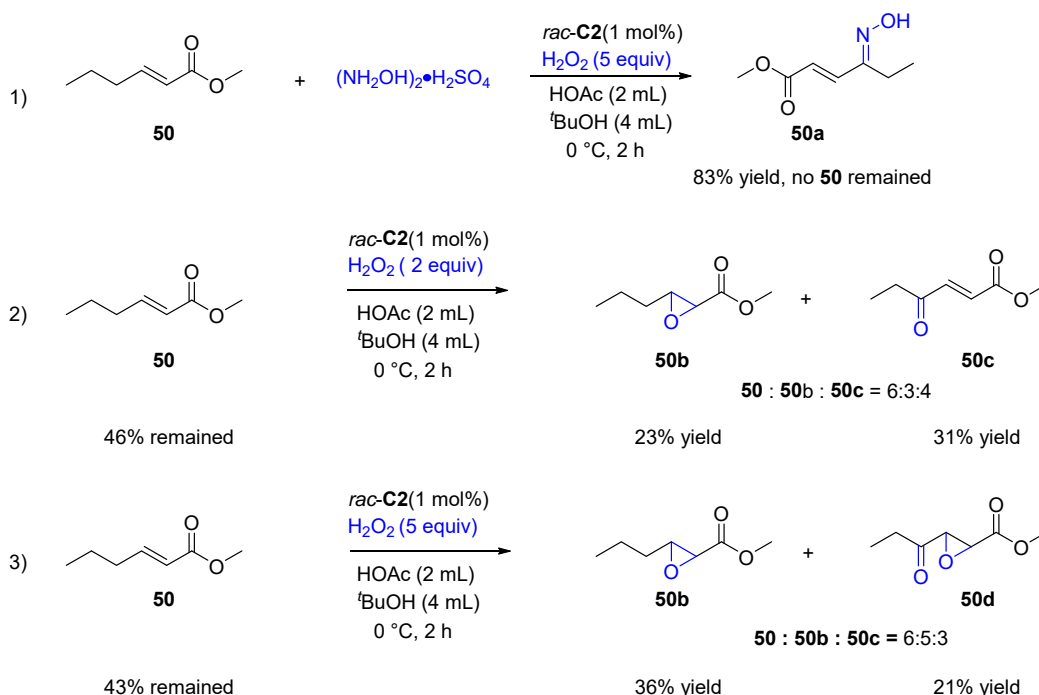

**1) With  $(\text{NH}_2\text{OH})_2 \cdot \text{H}_2\text{SO}_4$ :** the reaction was carried out according to Section 9, Procedure B, using (*E*)-hex-2-enoate (128.2 mg, 1.0 mmol, 1.0 equiv.) with  $\text{H}_2\text{O}_2$  (5.0 equiv.). A mixture of two isomers (*E*)-**50a** and (*Z*)-**50a** was obtained, 83% isolated yield (see Figure S-9, 1). For the analytic data, see Section 12.

**2) Without  $(\text{NH}_2\text{OH})_2 \cdot \text{H}_2\text{SO}_4$ :** the reaction was carried out according to Section 9, Procedure B using (*E*)-hex-2-enoate (128.2 mg, 1.0 mmol, 1.0 equiv.) with  $\text{H}_2\text{O}_2$  (2.0 equiv.) but without  $(\text{NH}_2\text{OH})_2 \cdot \text{H}_2\text{SO}_4$ . A mixture of **50** (46% remained), **50b** (23% yield), and **50c** (31% yield) was obtained; yield determined by  $^1\text{H}$  NMR of crude reaction mixture (see Figure S-9, 2); **50b**<sup>63</sup>, **HRMS (ESI):**  $m/z$   $[\text{M}+\text{H}]^+$  calcd for  $\text{C}_7\text{H}_{13}\text{O}_3^+$ :145.0859; found: 145.0873; **50c**<sup>64</sup>, **HRMS (ESI):**  $m/z$   $[\text{M}+\text{H}]^+$  calcd for  $\text{C}_7\text{H}_{11}\text{O}_3^+$ :143.0703; found: 143.0707.

**3) Without (NH<sub>2</sub>OH)<sub>2</sub>·H<sub>2</sub>SO<sub>4</sub>:** the reaction was carried out according to Section 9, Procedure B using (*E*)-hex-2-enoate (128.2 mg, 1.0 mmol, 1.0 equiv.) with H<sub>2</sub>O<sub>2</sub> (5.0 equiv.) but without (NH<sub>2</sub>OH)<sub>2</sub>·H<sub>2</sub>SO<sub>4</sub>. A mixture of **50** (**43%** remained), **50b** (**36%** yield), and **50d** (**21%** yield) was obtained, yield determined by <sup>1</sup>H NMR of crude reaction mixture (see Figure S-9, 3); **50d**, **HRMS (ESI):** *m/z* [M+H]<sup>+</sup> calcd for C<sub>7</sub>H<sub>11</sub>O<sub>4</sub><sup>+</sup>:159.0652; found: 159.0666.

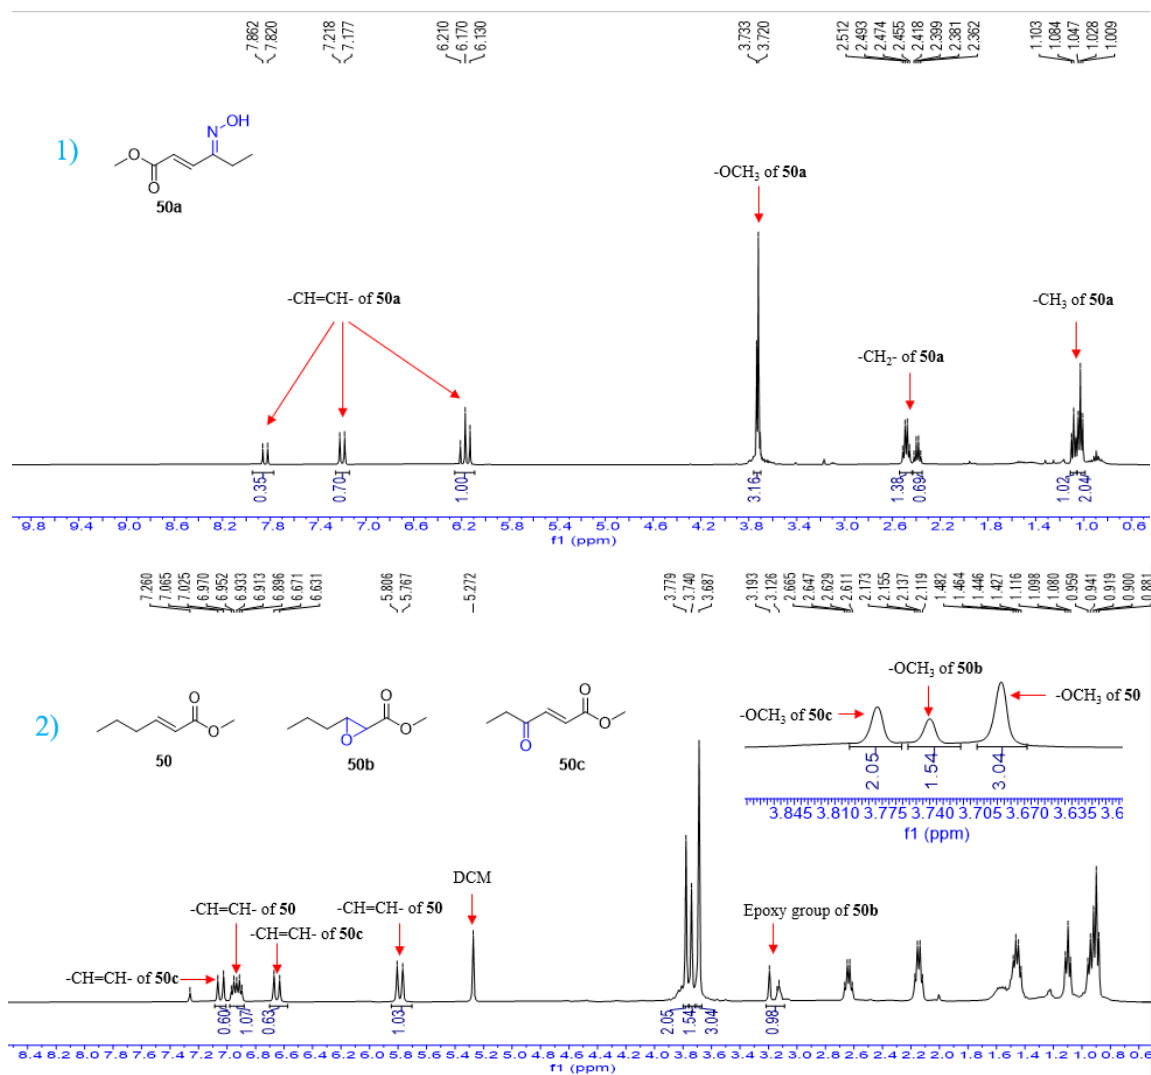

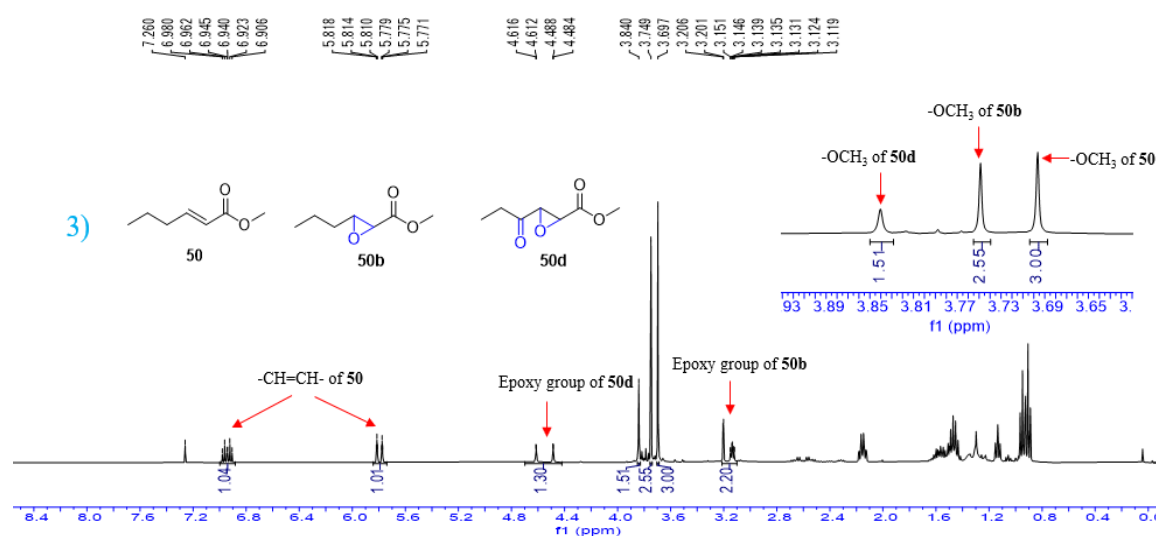

Fig S-9. Chemoselective oxidative of (*E*)-hex-2-enoate with or without  $(\text{NH}_2\text{OH})_2\cdot\text{H}_2\text{SO}_4$

### 6.7. Effect of $(\text{NH}_2\text{OH})_2\cdot\text{H}_2\text{SO}_4$ on the *rac*-C1 catalyzed oximation of sclareolide

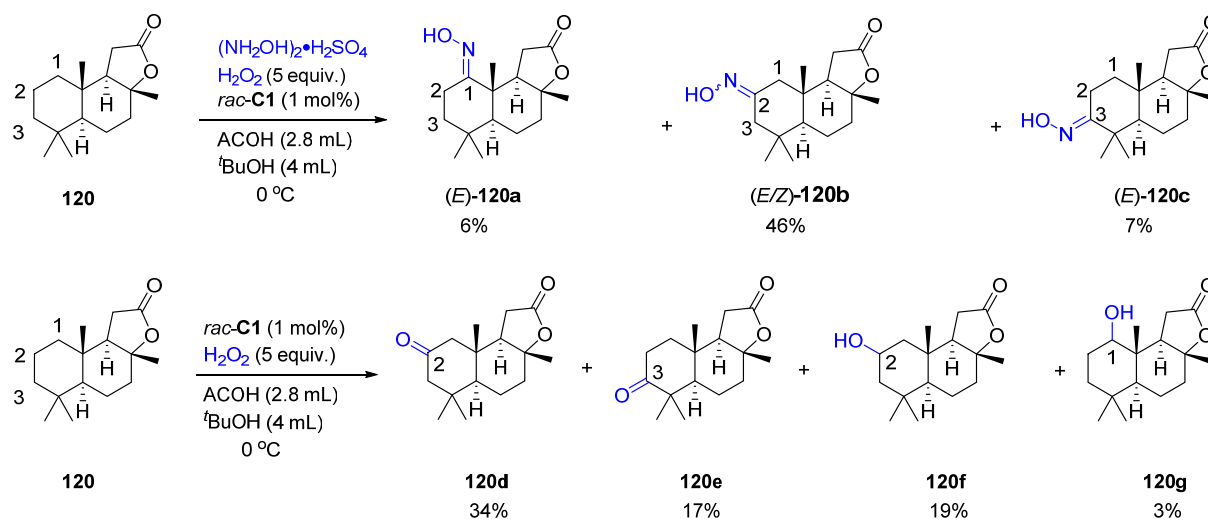

with  $(\text{NH}_2\text{OH})_2\cdot\text{H}_2\text{SO}_4$ :  $\text{C}_1/\text{C}_2/\text{C}_3 = 1:7.7:1.2$ , no alcohol product observed

without  $(\text{NH}_2\text{OH})_2\cdot\text{H}_2\text{SO}_4$ :  $\text{C}_1/\text{C}_2/\text{C}_3 = 1:18:6$ , alcohol : ketone = 1:2.3

**1) With  $(\text{NH}_2\text{OH})_2\cdot\text{H}_2\text{SO}_4$ :** the reaction was carried out according to Section 9, Procedure A using sclareolide (250.4 mg, 1.0 mmol, 1.0 equiv.) with *rac*-C1 to give four separated products: *E*-**120a**, *E*-**120b**, *Z*-**120b** and *E*-**120c**; the analytic data for products are seen in the Section 12.

**2) Without  $(\text{NH}_2\text{OH})_2\cdot\text{H}_2\text{SO}_4$ :** the reaction was carried out according to Section 9, Procedure A using sclareolide (250.4 mg, 1.0 mmol, 1.0 equiv.) with *rac*-C1 but without  $(\text{NH}_2\text{OH})_2\cdot\text{H}_2\text{SO}_4$  to

give a mixture of **120d** and **120e**, and separated products **120f** and **120g**; the analytic data for all products are seen in the Section 12.

#### 6.8. UV-Vis spectra of *rac*-C1 and relevant reagents under various conditions

Where mixed reagents are concerned, all measurements (Figures S12-15) were undertaken immediately upon mixing the reagents in the solvent.

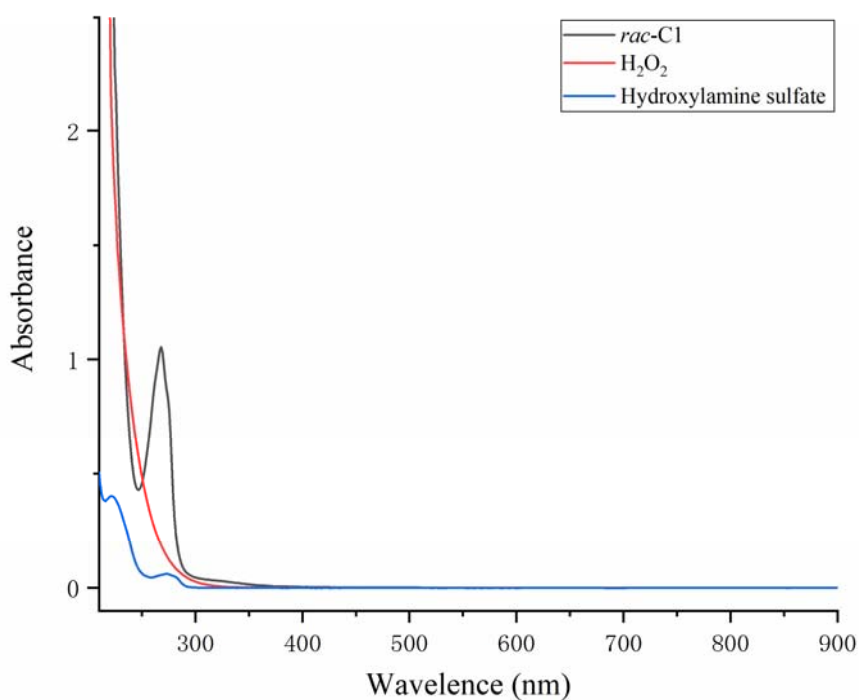

**Figure S-10.** UV-vis absorption spectrum of *rac*-C1 (0.1 mM) in CH<sub>3</sub>CN (black line), H<sub>2</sub>O<sub>2</sub> (20 mM) in CH<sub>3</sub>CN (red line), and hydroxylamine sulfate ((NH<sub>2</sub>OH)<sub>2</sub>•H<sub>2</sub>SO<sub>4</sub> is only slightly soluble in CH<sub>3</sub>CN) in CH<sub>3</sub>CN (blue line).

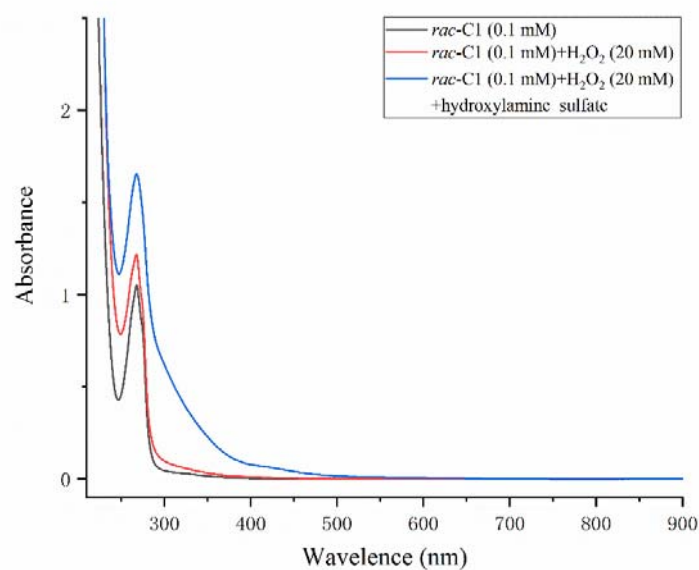

**Figure S-11.** UV-vis absorption spectra of *rac*-C1 (0.1 mM) in CH<sub>3</sub>CN (black line), *rac*-C1 (0.1 mM) in the presence of H<sub>2</sub>O<sub>2</sub> (20 mM) in CH<sub>3</sub>CN (red line), and *rac*-C1 (0.1 mM) in the presence of H<sub>2</sub>O<sub>2</sub> (20 mM) and hydroxylamine sulfate in CH<sub>3</sub>CN (blue line).

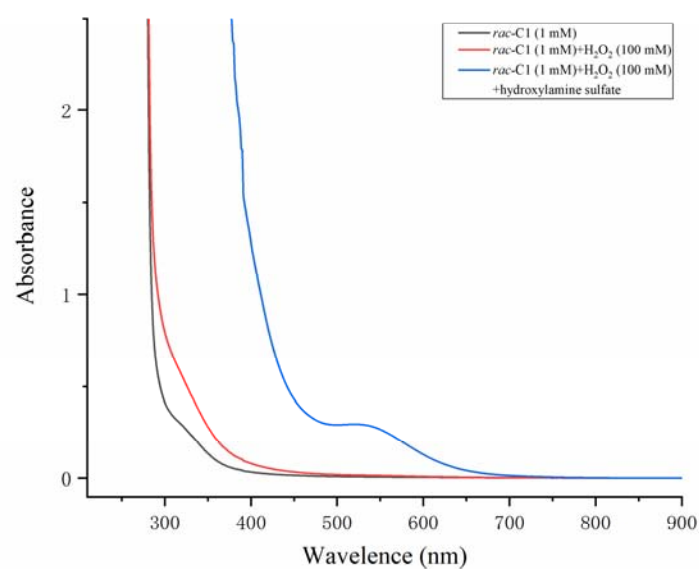

**Figure S-12.** UV-vis absorption spectra of *rac*-C1 (1 mM) in CH<sub>3</sub>CN (black line), *rac*-C1 (1 mM) in the presence of H<sub>2</sub>O<sub>2</sub> (100 mM) in CH<sub>3</sub>CN (red line), and *rac*-C1 (1 mM) in the presence of H<sub>2</sub>O<sub>2</sub> (100 mM) and hydroxylamine sulfate in CH<sub>3</sub>CN (blue line).

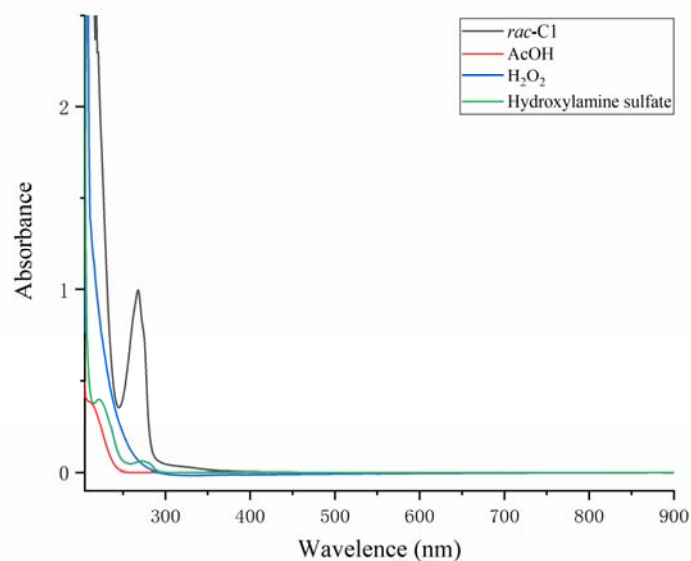

**Figure S-13.** UV-vis absorption spectra of *rac*-C1 (0.1 mM) in CH<sub>3</sub>CN (black line), AcOH (10 Mm) in CH<sub>3</sub>CN (red line), H<sub>2</sub>O<sub>2</sub> (20 mM) in CH<sub>3</sub>CN (blue line), and hydroxylamine sulfate ((NH<sub>2</sub>OH)<sub>2</sub>•H<sub>2</sub>SO<sub>4</sub> is only slightly soluble in CH<sub>3</sub>CN) in CH<sub>3</sub>CN (green line).

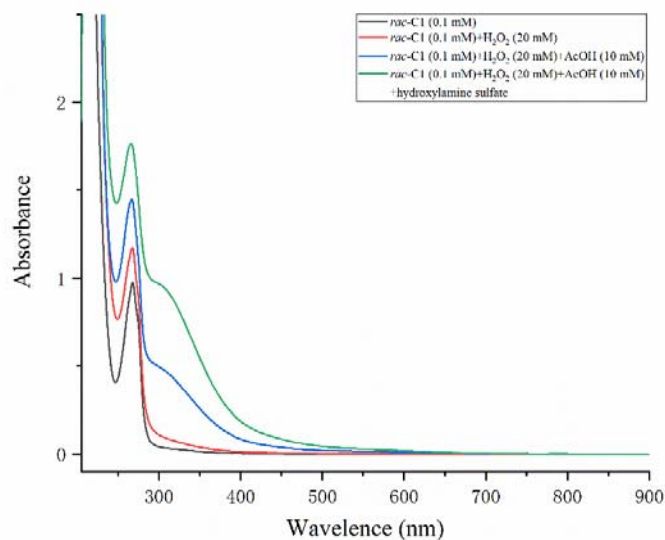

**Figure S-14.** UV-vis absorption spectra of *rac*-C1 (0.1 mM) in CH<sub>3</sub>CN (black line), *rac*-C1 (0.1 mM) in the presence of H<sub>2</sub>O<sub>2</sub> (20 mM) in CH<sub>3</sub>CN (red line), *rac*-C1 (0.1 mM) in the presence of H<sub>2</sub>O<sub>2</sub> (20 mM) and AcOH (10 Mm) in CH<sub>3</sub>CN (blue line), and *rac*-C1 (0.1 mM) in the presence of H<sub>2</sub>O<sub>2</sub> (20 mM), AcOH (10 Mm), and hydroxylamine sulfate in CH<sub>3</sub>CN (green line).



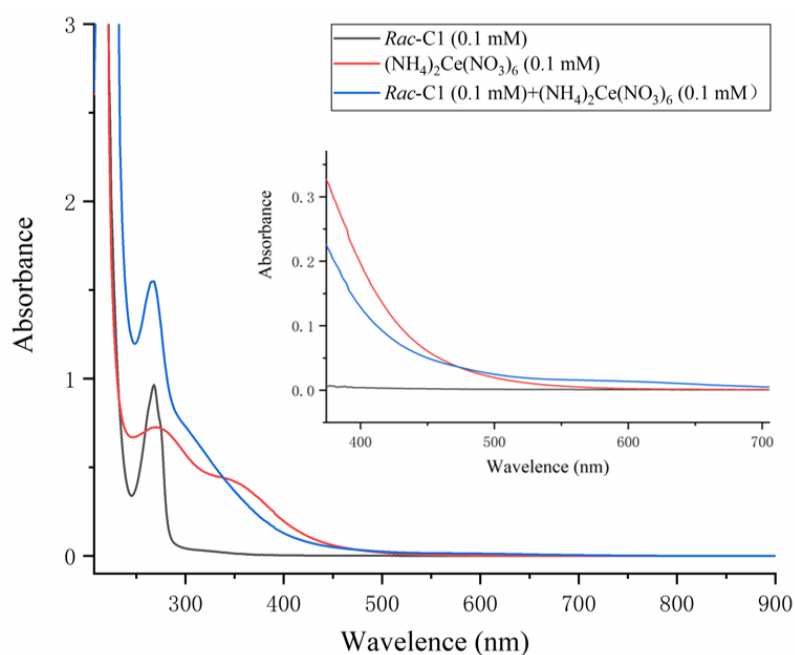

**Figure S-15.** UV-vis absorption spectra of *rac*-C1 (0.1 mM) in CH<sub>3</sub>CN (black line), (NH<sub>4</sub>)<sub>2</sub>Ce(NO<sub>3</sub>)<sub>6</sub> (0.1 mM) in CH<sub>3</sub>CN (red line), and *rac*-C1 (0.1 mM) in the presence of (NH<sub>4</sub>)<sub>2</sub>Ce(NO<sub>3</sub>)<sub>6</sub> (0.1 mM) in CH<sub>3</sub>CN (blue line).

The UV-vis measurements above indicate the oxidation of *rac*-1 upon mixing it with H<sub>2</sub>O<sub>2</sub>, resulting in the formation of (*rac*-L<sup>1</sup>)Mn(III) and/or (*rac*-L<sup>1</sup>)Mn(III)(μ-O)<sub>2</sub>Mn(IV)(*rac*-L<sup>1</sup>) species<sup>65-68</sup>, and the reaction is accelerated by hydroxylamine sulfate.

## 7. Synthesis and characterization of substrates

### 7.1 General procedure for synthesis of 13, 16, 20, 41, 47–48, 83<sup>51</sup>

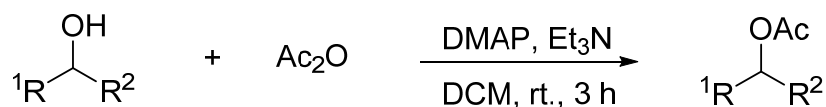

To a solution of an alcohols (10.0 mmol, 1.0 equiv.) and 4-dimethylpyridine (DMAP, 122.2 mg, 1.0 mmol, 10 mol %) in DCM (30.0 mL), acetic anhydride (12.0 mmol, 1.13 mL, 1.2 equiv.) was slowly added at room temperature with stirring. After 30 minutes, Et<sub>3</sub>N (1.4 mL, 10.0 mmol, 1 equiv.) was added and then the solution stirred for 3 hours. After the reaction was complete, saturated sodium bicarbonate solution was added to remove the excess acetic anhydride. After addition of DCM (20.0 mL) and H<sub>2</sub>O (20.0 mL), the reaction mixture was extracted with DCM

(3×20.0 mL). The combined organic layers were washed with brine and dried over Na<sub>2</sub>SO<sub>4</sub>. After concentration, the residue was purified by flash column chromatography on silica gel (gradient elution: Petroleum ether /EtOAc = 100:1–20:1) to give **13**, **16**, **20**, **41**, **47–48**, **83**.

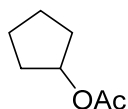

**Cyclopentyl acetate (13)**<sup>69</sup> was synthesized according to procedure **7.1** as a colorless liquid (1.21 g, 95% yield). <sup>1</sup>H NMR (400 MHz, CDCl<sub>3</sub>) δ (ppm): 5.18–5.11 (m, 1H), 2.01 (s, 3H), 1.90–1.81 (m, 2H), 1.75–1.62 (m, 4H), 1.61–1.55 (m, 2H); <sup>13</sup>C NMR (101 MHz, CDCl<sub>3</sub>) δ (ppm): 171.1, 77.1, 32.7, 23.8, 21.5.

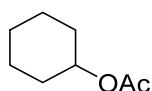

**Cyclohexyl acetate (16)**<sup>70</sup> was synthesized according to procedure **7.1** as a colorless liquid (1.34 g, 94% yield). <sup>1</sup>H NMR (400 MHz, CDCl<sub>3</sub>) δ (ppm): 4.78–4.68 (m, 1H), 2.03 (s, 3H), 1.88–1.80 (m, 2H), 1.75–1.68 (m, 2H), 1.58–1.51 (m, 1H), 1.45–1.29 (m, 4H), 1.29–1.19 (m, 1H); <sup>13</sup>C NMR (101 MHz, CDCl<sub>3</sub>) δ (ppm): 170.7, 72.8, 31.8, 25.5, 23.9, 21.6.

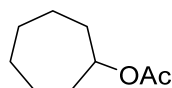

**Cycloheptyl acetate (20)**<sup>70</sup> was synthesized according to procedure **7.1** as a colorless liquid (1.50 g, 96% yield). <sup>1</sup>H NMR (400 MHz, CDCl<sub>3</sub>) δ (ppm): 4.98–4.83 (m, 1H), 2.02 (s, 3H), 1.94–1.84 (m, 2H), 1.69–1.59 (m, 4H), 1.58–1.53 (m, 4H), 1.50–1.38 (m, 2H); <sup>13</sup>C NMR (101 MHz, CDCl<sub>3</sub>) δ (ppm): 170.6, 75.3, 33.9, 28.4, 23.0, 21.6.

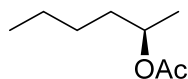

**(R)-Hexan-2-yl acetate (41)**<sup>71</sup> was synthesized according to procedure **7.1** as a colorless liquid (1.37 g, 95% yield). <sup>1</sup>H NMR (400 MHz, CDCl<sub>3</sub>) δ (ppm): 4.90–4.81 (m, 1H), 1.99 (s, 3H), 1.60–1.50 (m, 1H), 1.48–1.38 (m, 1H), 1.32–1.21 (m, 4H), 1.16 (d, *J* = 6.0 Hz, 3H), 0.86 (t, *J* = 6.8 Hz, 3H); <sup>13</sup>C NMR (101 MHz, CDCl<sub>3</sub>) δ (ppm): 170.9, 71.1, 35.7, 27.7, 22.6, 21.4, 20.0, 14.1.

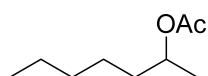

**Heptan-2-yl acetate (47)**<sup>70</sup> was synthesized according to procedure 7.1 as a colorless liquid (1.52 g, 96% yield). <sup>1</sup>H NMR (400 MHz, CDCl<sub>3</sub>) δ (ppm): 4.93–4.81 (m, 1H), 2.01 (s, 3H), 1.62–1.51 (m, 1H), 1.49–1.40 (m, 1H), 1.35–1.22 (m, 6H), 1.19 (d, *J* = 6.0 Hz, 3H), 0.87 (t, *J* = 6.8 Hz, 3H); <sup>13</sup>C NMR (101 MHz, CDCl<sub>3</sub>) δ (ppm): 170.9, 71.2, 36.0, 31.8, 25.2, 22.7, 21.5, 20.1, 14.1.

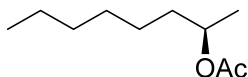

**(*R*)-Octan-2-yl acetate (48)**<sup>72</sup> was synthesized according to procedure 7.1 as a colorless liquid (1.63 g, 95% yield). <sup>1</sup>H NMR (400 MHz, CDCl<sub>3</sub>) δ (ppm): 4.92–4.81 (m, 1H), 2.00 (s, 3H), 1.61–1.51 (m, 1H), 1.49–1.39 (m, 1H), 1.30–1.21 (m, 8H), 1.18 (d, *J* = 6.4 Hz, 3H), 0.86 (t, *J* = 6.8 Hz, 3H); <sup>13</sup>C NMR (101 MHz, CDCl<sub>3</sub>) δ (ppm): 170.9, 71.2, 36.1, 31.9, 29.2, 25.5, 22.7, 21.5, 20.1, 14.2.

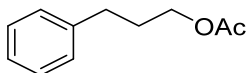

**3-Phenylpropyl acetate (83)**<sup>73</sup> was synthesized according to procedure 7.1 as a colorless liquid (1.73 g, 97% yield). <sup>1</sup>H NMR (400 MHz, CDCl<sub>3</sub>) δ (ppm): 7.30–7.24 (m, 2H), 7.21–7.15 (m, 3H), 4.08 (t, *J* = 6.4 Hz, 2H), 2.69 (t, *J* = 7.6 Hz, 2H), 2.05 (s, 3H), 2.00–1.87 (quint, *J* = 7.2 Hz, 2H); <sup>13</sup>C NMR (101 MHz, CDCl<sub>3</sub>) δ (ppm): 171.3, 141.3, 128.6, 128.5, 126.1, 64.0, 32.3, 30.3, 21.1.

## 7.2 Synthesis of 23–24<sup>51</sup>

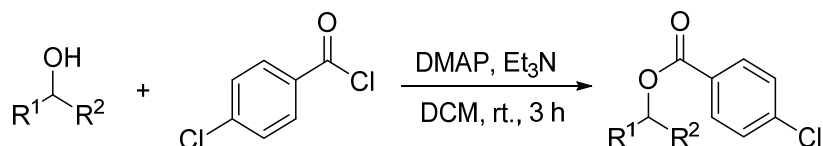

To a solution of alcohols (10 mmol, 1 equiv.) and 4-dimethylpyridine (DMAP, 122.2 mg, 1.0 mmol, 10 mol%) in DCM (30.0 mL), 4-chlorobenzoyl chloride (12.0 mmol, 2.1 g, 1.2 equiv.) was slowly added at room temperature with stirring. After 30 minutes, Et<sub>3</sub>N (1.4 mL, 10 mmol, 1.0 equiv.) was added and then stirred for 3 hours. After the reaction was complete, sodium saturated bicarbonate solution was added to remove the excess 4-chlorobenzoyl chloride. After addition of DCM (20.0 mL) and H<sub>2</sub>O (20.0 mL), the reaction mixture was extracted with DCM (3×20.0 mL). The combined organic layers were washed with brine and dried over Na<sub>2</sub>SO<sub>4</sub>. After concentration, the residue was purified by flash column chromatography on silica gel (gradient elution: Petroleum ether/EtOAc = 101:1–20:1) to give **23–24**.

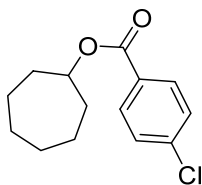

**Cycloheptyl 4-chlorobenzoate (23)**<sup>51</sup> was synthesized according to procedure 7.2 as a colorless liquid (2.30 g, 91% yield). <sup>1</sup>H NMR (400 MHz, CDCl<sub>3</sub>) δ (ppm): 7.97 (d, *J* = 8.4 Hz, 2H), 7.40 (d, *J* = 8.8 Hz, 2H), 5.23–5.14 (m, 1H), 2.06–1.96 (m, 2H), 1.86–1.78 (m, 2H), 1.76–1.67 (m, 2H), 1.64–1.59 (m, 4H), 1.58–1.47 (m, 2H); <sup>13</sup>C NMR (101 MHz, CDCl<sub>3</sub>) δ (ppm): 165.2, 139.2, 131.1, 129.7, 128.7, 76.2, 34.0, 28.5, 23.1.

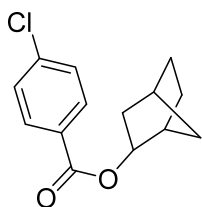

**endo/exo-Bicyclo[2.2.1]heptan-2-yl 4-chlorobenzoate (24)**<sup>74</sup> was synthesized according to procedure 7.2 as a colorless liquid (2.26 g, 90% yield, *endo/exo* = 9:1). <sup>1</sup>H NMR (400 MHz, CDCl<sub>3</sub>) δ (ppm): 8.08–7.88 (m, 2H), 7.54–7.31 (m, 2H), 5.22–5.14 (m, 0.9H, *endo*), 4.84 (d, *J* = 7.2 Hz, 0.1H, *exo*), 2.63–2.57 (m, 0.9 H, *endo*), 2.43 (d, *J* = 4.8 Hz, 0.1H, *exo*), 2.36–2.32 (m, 0.1H, *exo*), 2.30–2.25 (m, 0.9H, *endo*), 2.16–2.06 (m, 1H), 1.91–1.79 (m, 1H), 1.68–1.60 (m, 1H), 1.58–1.42 (m, 2H), 1.42–1.32 (m, 2H), 1.17–1.09 (m, 1H); <sup>13</sup>C NMR (101 MHz, CDCl<sub>3</sub>) δ (ppm): 165.8 (*endo*), 165.4 (*exo*), 139.3 (*endo*), 139.2 (*exo*), 131.0 (*endo*), 129.8 (*exo*), 129.4 (*exo*), 129.3 (*endo*), 128.73 (*endo*), 128.67 (*exo*), 78.5 (*exo*), 76.6 (*endo*), 41.7 (*exo*), 40.6 (*endo*), 39.7 (*exo*), 37.5 (*endo*), 37.2 (*endo*), 36.7 (*endo*), 35.5 (*exo*), 35.2 (*exo*), 29.5 (*endo*), 28.3 (*exo*), 24.4 (*exo*), 21.3 (*endo*).

### 7.3 Synthesis of 15, 21, 32–34, 45, 86–94<sup>75</sup>

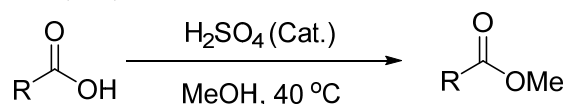

To a solution of a carboxylic acid (10.0 mmol) in a mixture of DCM (40.0 mL) and MeOH (5.0 mL) at 0 °C, H<sub>2</sub>SO<sub>4</sub> (100.0 mg, 1.0 mmol, 98 wt %) was added dropwise under stirring over 60 s. Then, the reaction mixture was stirred for 4–18 hours at 40 °C. After addition of DCM (40.0 mL)

and H<sub>2</sub>O (20.0 mL), the reaction mixture was extracted with DCM (3×20.0 mL). The combined organic layers were then dried over Na<sub>2</sub>SO<sub>4</sub>, and filtered. After concentration, the residue was purified by flash column chromatography on silica gel (gradient elution: petroleum ether/EtOAc = 200:1-50:1) to give **15**, **21**, **32–34**, **45**, **86–94**.

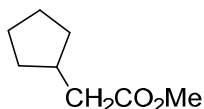

**Methyl 2-cyclopentylacetate (15)** was synthesized according to procedure **7.3** as a colorless liquid (1.31 g, 92% yield). <sup>1</sup>H NMR (400 MHz, CDCl<sub>3</sub>) δ (ppm): 3.66 (s, 3H), 2.31 (d, *J* = 7.2 Hz, 2H), 2.28–2.15 (m, 1H), 1.88–1.75 (m, 2H), 1.67–1.49 (m, 4H), 1.21–1.08 (m, 2H); <sup>13</sup>C NMR (101 MHz, CDCl<sub>3</sub>) δ (ppm): 174.0, 51.5, 40.3, 36.6, 32.6, 25.1.

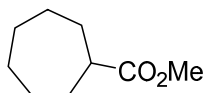

**Methyl cycloheptanecarboxylate (21)** <sup>76</sup> was synthesized according to procedure **7.3** as a colorless liquid (1.42 g, 91% yield). <sup>1</sup>H NMR (400 MHz, CDCl<sub>3</sub>) δ (ppm): 3.65 (s, 3H), 2.54–2.40 (m, 1H), 1.97–1.85 (m, 2H), 1.76–1.63 (m, 4H), 1.59–1.41 (m, 6H); <sup>13</sup>C NMR (101 MHz, CDCl<sub>3</sub>) δ (ppm): 177.7, 51.6, 45.1, 31.0, 28.4, 26.5.

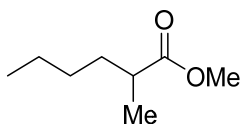

**Methyl 2-methylhexanoate (32)** <sup>76</sup> was synthesized according to procedure **7.3** as a colorless liquid (1.38 g, 96% yield). <sup>1</sup>H NMR (400 MHz, CDCl<sub>3</sub>) δ (ppm): 3.64 (s, 3H), 2.40 (sext, *J* = 7.2 Hz, 1H), 1.68–1.57 (m, 1H), 1.43–1.33 (m, 1H), 1.31–1.90 (m, 4H), 1.11 (d, *J* = 6.8 Hz, 3H), 0.86 (t, *J* = 6.8 Hz, 3H); <sup>13</sup>C NMR (101 MHz, CDCl<sub>3</sub>) δ (ppm): 177.5, 51.5, 39.5, 33.6, 29.5, 22.7, 17.2, 14.0.

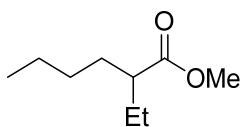

**Methyl 2-ethylhexanoate (33)** <sup>77</sup> was synthesized according to procedure **7.3** as a colorless liquid (1.49 g, 94% yield). <sup>1</sup>H NMR (400 MHz, CDCl<sub>3</sub>) δ (ppm): 3.65 (s, 3H), 2.30–2.21 (m, 1H),

1.66–1.38 (m, 4H), 1.32–1.17 (m, 4H), 0.86 (t,  $J = 7.6$  Hz, 6H);  $^{13}\text{C}$  NMR (101 MHz,  $\text{CDCl}_3$ )  $\delta$  (ppm): 177.0, 51.4, 47.4, 31.9, 29.8, 25.6, 22.8, 14.0, 12.0.

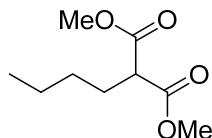

**Dimethyl 2-butylmalonate (34)**<sup>78</sup> was synthesized according to procedure **7.3** as a colorless liquid (1.79 g, 95% yield).  $^1\text{H}$  NMR (400 MHz,  $\text{CDCl}_3$ )  $\delta$  (ppm): 3.69 (s, 6H), 3.31 (td,  $J = 7.6$ , 2.4 Hz, 1H), 1.90–1.81 (m, 2H), 1.33–1.19 (m, 4H), 0.87–0.82 (m, 3H);  $^{13}\text{C}$  NMR (101 MHz,  $\text{CDCl}_3$ )  $\delta$  (ppm): 170.0, 52.4, 51.7, 29.5, 28.6, 22.3, 13.8.

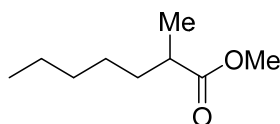

**Methyl 2-methylheptanoate (45)**<sup>76</sup> was synthesized according to procedure **7.3** as a colorless liquid (1.44 g, 91% yield).  $^1\text{H}$  NMR (400 MHz,  $\text{CDCl}_3$ )  $\delta$  (ppm): 3.64 (s, 3H), 2.40 (sext,  $J = 7.2$  Hz, 1H), 1.67–1.56 (m, 1H), 1.42–1.33 (m, 1H), 1.31–1.19 (m, 6H), 1.11 (d,  $J = 7.2$  Hz, 3H), 0.85 (t,  $J = 6.8$  Hz, 3H);  $^{13}\text{C}$  NMR (101 MHz,  $\text{CDCl}_3$ )  $\delta$  (ppm): 177.5, 51.5, 39.6, 33.9, 31.8, 27.0, 22.6, 17.1, 14.1.

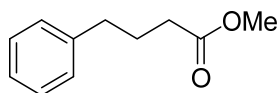

**Methyl 4-phenylbutanoate (85)**<sup>79</sup> was synthesized according to procedure **7.3** as a colorless liquid (1.64 g, 92% yield).  $^1\text{H}$  NMR (400 MHz,  $\text{CDCl}_3$ )  $\delta$  (ppm): 7.33–7.27 (m, 2H), 7.23–7.17 (m, 3H), 3.67 (s, 3H), 2.66 (t,  $J = 7.6$  Hz, 2H), 2.35 (t,  $J = 7.2$  Hz, 2H), 1.97 (quint,  $J = 7.6$  Hz, 2H);  $^{13}\text{C}$  NMR (101 MHz,  $\text{CDCl}_3$ )  $\delta$  (ppm): 174.0, 141.5, 128.6, 128.5, 126.1, 51.6, 35.2, 33.5, 26.6.

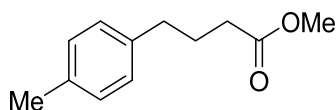

**Methyl 4-(*p*-tolyl)butanoate (86)**<sup>79</sup> was synthesized according to procedure **7.3** as a colorless liquid (1.73 g, 90% yield).  $^1\text{H}$  NMR (400 MHz,  $\text{CDCl}_3$ )  $\delta$  (ppm): 7.14–7.07 (m, 4H), 3.68 (s, 3H),

2.63 (t,  $J = 7.6$  Hz, 2H), 2.35 (t,  $J = 7.6$  Hz, 2H), 2.34 (s, 3H), 1.96 (quint,  $J = 7.6$  Hz, 2H);  $^{13}\text{C}$  NMR (101 MHz,  $\text{CDCl}_3$ )  $\delta$  (ppm): 174.1, 138.4, 135.5, 129.2, 128.5, 51.6, 34.8, 33.5, 26.7, 21.1.

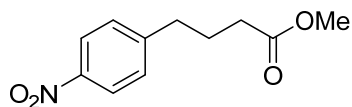

**Methyl 4-(4-nitrophenyl)butanoate (87)**<sup>80</sup> was synthesized according to procedure 7.3 as a colorless liquid (2.1 g, 94% yield).  $^1\text{H}$  NMR (400 MHz,  $\text{CDCl}_3$ )  $\delta$  (ppm): 8.15 (d,  $J = 8.4$  Hz, 2H), 7.34 (d,  $J = 8.8$  Hz, 2H), 3.68 (s, 3H), 2.76 (t,  $J = 7.6$  Hz, 2H), 2.35 (t,  $J = 7.6$  Hz, 2H), 1.99 (quint,  $J = 7.6$  Hz, 2H);  $^{13}\text{C}$  NMR (101 MHz,  $\text{CDCl}_3$ )  $\delta$  (ppm): 173.5, 149.4, 146.7, 129.4, 123.8, 51.8, 35.1, 33.3, 26.1.

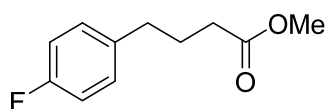

**Methyl 4-(4-fluorophenyl)butanoate (88)**<sup>79</sup> was synthesized according to procedure 7.3 as a colorless liquid (1.86 g, 95% yield).  $^1\text{H}$  NMR (400 MHz,  $\text{CDCl}_3$ )  $\delta$  (ppm): 7.15–7.10 (m, 2H), 6.99–6.93 (m, 2H), 3.66 (s, 3H), 2.62 (t,  $J = 7.6$  Hz, 2H), 2.32 (t,  $J = 7.2$  Hz, 2H), 1.93 (quint,  $J = 7.6$  Hz, 2H);  $^{13}\text{C}$  NMR (101 MHz,  $\text{CDCl}_3$ )  $\delta$  (ppm): 174.0, 162.5 (d,  $J_{\text{C-F}} = 242.0$  Hz), 137.1 (d,  $J_{\text{C-F}} = 3.0$  Hz), 129.9 (d,  $J_{\text{C-F}} = 8.0$  Hz), 115.2 (d,  $J_{\text{C-F}} = 21.0$  Hz), 51.7, 34.4, 33.4, 26.7.

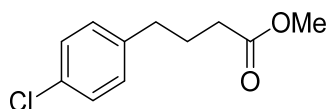

**Methyl 4-(4-chlorophenyl)butanoate (89)**<sup>79</sup> was synthesized according to procedure 7.3 as a colorless liquid (2.0 g, 94% yield).  $^1\text{H}$  NMR (400 MHz,  $\text{CDCl}_3$ )  $\delta$  (ppm): 7.27–7.22 (m, 2H), 7.13–7.08 (m, 2H), 3.66 (s, 3H), 2.62 (t,  $J = 7.6$  Hz, 2H), 2.32 (t,  $J = 7.6$  Hz, 2H), 1.93 (quint,  $J = 7.6$  Hz, 2H);  $^{13}\text{C}$  NMR (101 MHz,  $\text{CDCl}_3$ )  $\delta$  (ppm): 173.9, 139.9, 131.9, 130.0, 128.6, 51.7, 34.6, 33.4, 26.5.

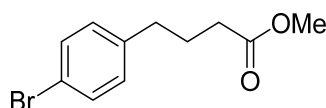

**Methyl 4-(4-bromophenyl)butanoate (90)** was synthesized according to procedure 7.3 as a colorless liquid (2.36 g, 92% yield).  $^1\text{H}$  NMR (400 MHz,  $\text{CDCl}_3$ )  $\delta$  (ppm): 7.42–7.37 (m, 2H), 7.07–7.03 (m, 2H), 3.66 (s, 3H), 2.60 (t,  $J = 7.6$  Hz, 2H), 2.31 (t,  $J = 7.6$  Hz, 2H), 1.93 (quint,  $J =$

7.6 Hz, 2H);  $^{13}\text{C}$  NMR (101 MHz,  $\text{CDCl}_3$ )  $\delta$  (ppm): 173.8, 140.4, 131.6, 130.4, 119.9, 51.7, 34.6, 33.3, 26.4.

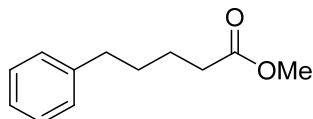

**Methyl 5-phenylpentanoate (91)**<sup>81</sup> was synthesized according to procedure 7.3 as a colorless liquid (1.79 g, 93% yield).  $^1\text{H}$  NMR (400 MHz,  $\text{CDCl}_3$ )  $\delta$  (ppm): 7.31–7.26 (m, 2H), 7.22–7.16 (m, 3H), 3.67 (s, 3H), 2.64 (t,  $J$  = 7.2 Hz, 2H), 2.35 (t,  $J$  = 7.2 Hz, 2H), 1.74–1.60 (m, 4H);  $^{13}\text{C}$  NMR (101 MHz,  $\text{CDCl}_3$ )  $\delta$  (ppm): 174.2, 142.2, 128.5, 128.4, 125.9, 51.6, 35.7, 34.1, 31.0, 24.7.

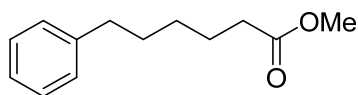

**Methyl 6-phenylhexanoate (92)**<sup>82</sup> was synthesized according to procedure 7.3 as a colorless liquid (1.88 g, 91% yield).  $^1\text{H}$  NMR (400 MHz,  $\text{CDCl}_3$ )  $\delta$  (ppm): 7.32–7.27 (m, 2H), 7.21–7.17 (m, 3H), 3.68 (s, 3H), 2.63 (t,  $J$  = 7.6 Hz, 2H), 2.32 (t,  $J$  = 7.6 Hz, 2H), 1.73–1.61 (m, 4H), 1.43–1.33 (m, 2H);  $^{13}\text{C}$  NMR (101 MHz,  $\text{CDCl}_3$ )  $\delta$  (ppm): 174.3, 142.6, 128.5, 128.4, 125.8, 51.6, 35.8, 34.1, 31.2, 28.9, 24.9.

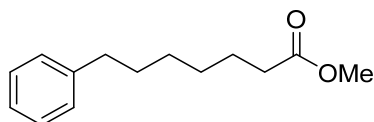

**Methyl 7-phenylheptanoate (93)**<sup>83</sup> was synthesized according to procedure 7.3 as a colorless liquid (1.98 g, 90% yield).  $^1\text{H}$  NMR (400 MHz,  $\text{CDCl}_3$ )  $\delta$  (ppm): 7.29–7.23 (m, 2H), 7.19–7.14 (m, 3H), 3.65 (s, 3H), 2.59 (t,  $J$  = 7.6 Hz, 2H), 2.29 (t,  $J$  = 7.6 Hz, 2H), 1.66–1.57 (m, 4H), 1.39–1.29 (m, 4H);  $^{13}\text{C}$  NMR (101 MHz,  $\text{CDCl}_3$ )  $\delta$  (ppm): 174.4, 142.8, 128.5, 128.4, 125.7, 51.6, 36.0, 34.2, 31.4, 29.1, 29.0, 25.0.

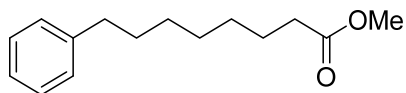

**Methyl 8-phenyloctanoate (94)** was synthesized according to procedure 7.3 as a colorless liquid (2.09 g, 89% yield).  $^1\text{H}$  NMR (400 MHz,  $\text{CDCl}_3$ )  $\delta$  (ppm): 7.29–7.24 (m, 2H), 7.19–7.14 (m, 3H), 3.66 (s, 3H), 2.59 (t,  $J$  = 7.6 Hz, 2H), 2.29 (t,  $J$  = 7.6 Hz, 2H), 1.66–1.56 (m, 4H), 1.36–1.28 (m,



6H);  $^{13}\text{C}$  NMR (101 MHz,  $\text{CDCl}_3$ )  $\delta$  (ppm): 174.4, 142.9, 128.5, 128.3, 125.7, 51.5, 36.0, 34.2, 31.5, 29.22, 29.20, 29.17, 25.0.

#### 7.4 Synthesis of **19**, **22**, **37** <sup>84</sup>

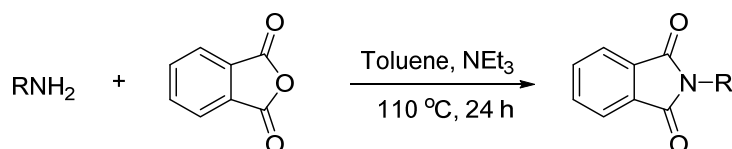

$\text{RNH}_2$  = Pentan-1-amine, Cyclohexanamine, Cycloheptanamine

A round flask was charged with phthalic anhydride (1.48 g, 10 mmol), primary amine (10 mmol), triethylamine (2.0 mL) and toluene (50.0 mL). The reaction mixture was heated to 110 °C and stirred for 24 hours. Then, the crude mixture was added water and extracted with DCM (2×20.0 mL) twice. The combined organic phase was then washed with water and brine, dried over anhydrous  $\text{Na}_2\text{SO}_4$ , filtered and concentrated. the residue was purified by flash column chromatography (petroleum ether /EtOAc=4:1) to give the desired product **19**, **22**, **37**.

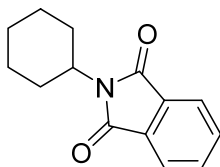

**2-Cyclohexylisoindoline-1,3-dione (19)** <sup>85</sup>: was synthesized according to procedure **7.4** as a white solid (1.88 g, 82% yield);  $^1\text{H}$  NMR (400 MHz,  $\text{CDCl}_3$ )  $\delta$  (ppm): 7.81–7.75 (m, 2H), 7.70–7.63 (m, 2H), 4.13–4.03 (m, 1H), 2.24–2.12 (m, 2H), 1.88–1.80 (m, 2H), 1.74–1.63 (m, 3H), 1.42–1.20 (m, 3H);  $^{13}\text{C}$  NMR (101 MHz,  $\text{CDCl}_3$ )  $\delta$  (ppm): 168.5, 133.8, 132.2, 123.1, 51.0, 30.0, 26.1, 25.2.

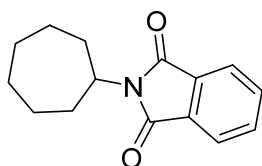

**2-Cycloheptylisoindoline-1,3-dione (22)** <sup>86</sup>: was synthesized according to procedure **7.4** as a white solid (2.12 g, 87% yield);  $^1\text{H}$  NMR (400 MHz,  $\text{CDCl}_3$ )  $\delta$  (ppm): 7.83–7.78 (m, 2H), 7.70–7.65 (m, 2H), 4.30–4.21 (m, 1H), 2.31–2.20 (m, 2H), 1.86–1.75 (m, 4H), 1.69–1.57 (m, 4H), 1.57–1.45 (m, 2H);  $^{13}\text{C}$  NMR (101 MHz,  $\text{CDCl}_3$ )  $\delta$  (ppm): 168.4, 133.9, 132.3, 123.1, 52.9, 32.8, 27.7, 25.6.

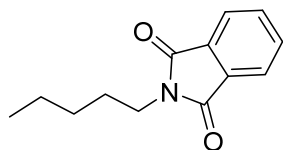

**2-Pentylisoindoline-1,3-dione (37)**<sup>85</sup>: was synthesized according to procedure 7.4 as a white solid (1.85 g, 85% yield); <sup>1</sup>H NMR (400 MHz, CDCl<sub>3</sub>) δ (ppm): 7.80–7.73 (m, 2H), 7.68–7.61 (m, 2H), 3.66–3.57 (m, 2H), 1.67–1.56 (m, 2H), 1.34–1.22 (m, 4H), 0.87–0.79 (m, 3H); <sup>13</sup>C NMR (101 MHz, CDCl<sub>3</sub>) δ (ppm): 168.4, 133.8, 132.2, 123.1, 38.0, 29.0, 28.3, 22.3, 13.9.

### 7.5 Synthesis of (*R*)-*N*-(1-(4-bromophenyl)ethyl)pentan-1-amine (38)<sup>87</sup>

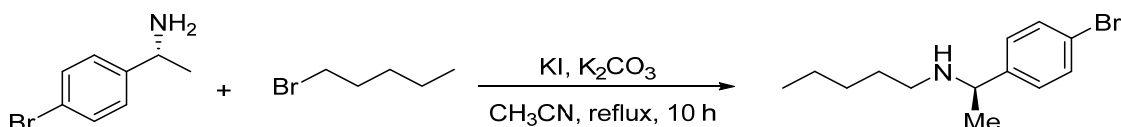

A solution of (*R*)-1-(4-bromophenyl)ethan-1-amine (2.4 g, 12.0 mmol, 1.2 equiv.), 1-bromopentane (1.51 g, 10.0 mmol, 1.0 equiv.), powdered K<sub>2</sub>CO<sub>3</sub> (1.38 g, 10.0 mmol, 1.0 equiv.) and a catalytic amount of KI in acetonitrile (30.0 mL) was prepared. The reaction mixture was heated to reflux for 18 h, and then cooled to room temperature. K<sub>2</sub>CO<sub>3</sub> was removed by filtration and the solvent was concentrated under vacuum, the residue was purified on silica gel chromatography (DCM/MeOH=101:1) to give the desired product **38** (2.48 g, 92% yield, colorless oil). <sup>1</sup>H NMR (400 MHz, CDCl<sub>3</sub>) δ (ppm): 7.45–7.41 (m, 2H), 7.21–7.17 (m, 2H), 3.71 (q, *J* = 6.8 Hz, 1H), 2.50–2.42 (m, 1H), 2.40–2.33 (m, 1H), 1.48–1.39 (m, 2H), 1.30 (d, *J* = 6.8 Hz, 3H), 1.29–1.21 (m, 4H), 0.87 (t, *J* = 7.2 Hz, 3H); <sup>13</sup>C NMR (101 MHz, CDCl<sub>3</sub>) δ (ppm): 145.2, 131.6, 128.5, 120.5, 58.0, 48.0, 30.1, 29.7, 24.6, 22.7, 14.2.

### 7.6 Synthesis of *N*-(4-bromobenzyl)-*N*-methylpentan-1-amine (39)<sup>87</sup>

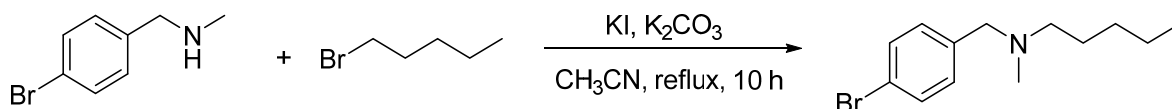

A solution of 1-(4-bromophenyl)-*N*-methylmethanamine (2.0 g, 10.0 mmol, 1.0 equiv.), 1-bromopentane (1.81 g, 12 mmol, 1.2 equiv.), powdered K<sub>2</sub>CO<sub>3</sub> (1.38 g, 10.0 mmol, 1.0 equiv.) and a catalytic amount of KI in acetonitrile (30.0 mL) was prepared. The reaction mixture was heated to reflux for 1 h, and then cooled to room temperature. K<sub>2</sub>CO<sub>3</sub> was removed by filtration and the solvent was concentrated under vacuum. The residue was purified on silica gel chromatography

(DCM/MeOH=100:1) to give the desired product **39**<sup>88</sup> (2.50 g, 93% yield, colorless oil). <sup>1</sup>H NMR (400 MHz, CDCl<sub>3</sub>) δ (ppm): 7.45–7.41 (m, 2H), 7.21–7.17 (m, 2H), 3.41 (s, 2H), 2.33 (t, *J* = 7.2 Hz, 2H), 2.16 (s, 3H), 1.50 (quint, *J* = 7.6 Hz, 2H), 1.35–1.23 (m, 4H), 0.89 (t, *J* = 7.2 Hz, 3H); <sup>13</sup>C NMR (101 MHz, CDCl<sub>3</sub>) δ (ppm): 138.7, 131.4, 130.8, 120.7, 61.8, 57.7, 42.3, 29.8, 27.2, 22.8, 14.2.

### 7.7 Synthesis of *N*-(4-bromobenzyl)-*N*,2-dimethylbutan-1-amine (**40**)<sup>89-90</sup>

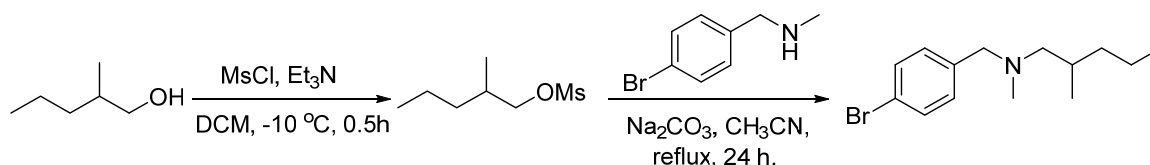

To a solution of 2-methylpentan-1-ol (817.0 mg, 8.0 mmol) and triethylamine (1.88 mL, 13.6 mmol) in dry DCM (20.0 mL) at -10 °C, methanesulfonyl chloride (0.74 mL, 9.6 mmol) was slowly added and the reaction mixture was stirred for 0.5 h. After the reaction was complete, saturated solution of NaHCO<sub>3</sub> (10.0 mL) and DCM (10.0 mL) were added to the reaction mixture. The organic layer was separated, and the aqueous layer was extracted with dichloromethane (3×15.0 mL) three times. The combined organic layers were washed with brine and dried over Na<sub>2</sub>SO<sub>4</sub>. After concentration, the crude 2-methylpentyl methanesulfonate was obtained without further purification.

Then, to a solution of 1-(4-bromophenyl)-*N*-methylmethanamine (1.20 g, 6 mmol) and powdered Na<sub>2</sub>CO<sub>3</sub> (1.33 g, 12.5 mmol) in acetonitrile (20 mL) at room temperature, 2-methylpentyl methanesulfonate (0.90 g, 5.0 mmol) was added and the reaction mixture was heated to reflux for 24 h. After the reaction was complete, deionized water (10 mL) and DCM (10 mL) were added to the reaction mixture. The organic layer was separated, and the aqueous layer was extracted with dichloromethane (3×15.0 mL) three times. The combined organic layers were washed with brine and dried over Na<sub>2</sub>SO<sub>4</sub>. After concentration, the residue was purified on silica gel chromatography (petroleum ether /EtOAc = 20:1) to give the desired product **40** (1.28 g, 90% yield). <sup>1</sup>H NMR (400 MHz, CDCl<sub>3</sub>) δ (ppm): 7.42 (d, *J* = 8.0 Hz, 2H), 7.20 (d, *J* = 8.0 Hz, 2H), 3.43 (q, *J* = 13.6 Hz, 1H), 3.35 (q, *J* = 13.6 Hz, 1H), 2.20–2.05 (m, 2H), 2.13 (s, 3H), 1.72–1.60 (m, 1H), 1.45–1.34 (m, 2H), 1.31–1.21 (m, 1H), 1.08–0.99 (m, 1H), 0.93–0.86 (m, 6H); <sup>13</sup>C NMR (101 MHz, CDCl<sub>3</sub>) δ (ppm): 139.1, 131.3, 130.7, 120.6, 64.9, 62.3, 42.8, 37.5, 31.0, 20.2, 18.3, 14.6.

### 7.8 Synthesis of heptan-2-one oxime (46)<sup>91</sup>

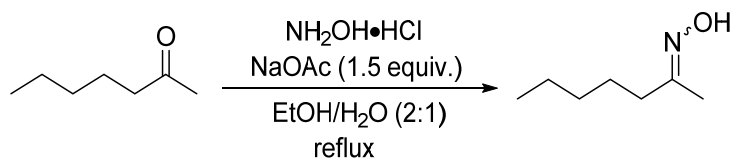

A solution of heptan-2-one (1.14 g, 10.0 mmol, 1.0 equiv.), sodium acetate (1.23 g, 15.0 mmol, 1.5 equiv.) and hydroxylamine hydrochloride (1.05 g, 15.0 mmol, 1.5 equiv.) in ethanol/water (20 mL/10mL) was prepared. The reaction mixture was heated to reflux for overnight, and then cooled to room temperature. The volatiles were removed by a rotary evaporator. To the crude mixture was added water and the mixture was extracted with ethyl acetate (2×20.0 mL) twice. The combined organic phase was then washed with water and brine, dried over anhydrous  $\text{Na}_2\text{SO}_4$ , filtered and concentrated. The oxime product was purified by flash column chromatography (petroleum ether /EtOAc = 10:1) to give the desired product **46** (1.18 g, 91% yield, *E/Z* = 2:1, colorless oil).  $^1\text{H}$  NMR (400 MHz,  $\text{CDCl}_3$ )  $\delta$  (ppm): 9.68 (brs, 1H), 2.35 (t, *J* = 7.6 Hz, 0.67H, *Z*), 1.66 (t, *J* = 7.6 Hz, 1.37H, *E*), 1.86 (s, 2H, *E*), 1.85 (s, 1H, *Z*), 1.53–1.45 (m, 2H), 1.35–1.20 (m, 4H), 0.90–0.84 (m, 3H);  $^{13}\text{C}$  NMR (101 MHz,  $\text{CDCl}_3$ )  $\delta$  (ppm): 159.1 (*Z*), 158.7 (*E*), 35.8, 32.0, 31.4, 28.7, 26.1, 25.2, 22.52, 22.47, 19.9, 14.0, 13.5.

### 7.9 Synthesis of methyl undec-2-enoate (54)<sup>51</sup>

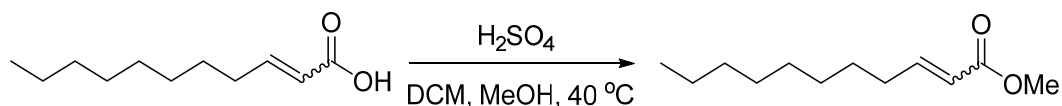

To a solution of (*Z/E*)-undec-2-enoic acid (921.4 mg, 5 mmol) in a mixture of DCM (20.0 mL) and methanol (3.0 mL) at 0 °C,  $\text{H}_2\text{SO}_4$  (50 mg, 0.5 mmol, 98 wt%) was added dropwise over 60 s. Then, the reaction mixture was stirred for 4 hours at 40 °C. After addition of DCM (20.0 mL) and  $\text{H}_2\text{O}$  (10.0 mL), the reaction mixture was extracted with DCM (3×20.0 mL). The combined organic layers were then dried over  $\text{Na}_2\text{SO}_4$ , and filtered. After concentration, the residue was purified by flash column chromatography on silica gel (gradient elution: petroleum ether/ethyl acetate = 200:1-101:1) to give (*Z/E*)-**54**<sup>92</sup> (922.2 mg, 93% yield, *Z/E* = 1:3) as a colorless liquid.  $^1\text{H}$  NMR (400 MHz,  $\text{CDCl}_3$ )  $\delta$  (ppm): 7.00–6.90 (m, 1H), 5.83–5.76 (m, 1H), 3.71 (s, 3H), 2.21–2.14 (m, 2H), 1.48–1.39 (m, 2H), 1.30–1.22 (m, 10H), 0.89–0.84 (m, 3H);  $^{13}\text{C}$  NMR (101 MHz,  $\text{CDCl}_3$ )  $\delta$

(ppm): 167.3(*E*), 166.9(*Z*), 149.9(*E*), 149.6 (*Z*), 121.3(*Z*), 120.9(*E*), 60.2(*Z*), 51.5(*E*), 32.34, 32.0, 29.5, 29.31, 29.27, 28.1, 22.8, 14.4(*Z*), 14.2(*E*).

### 7.10 Synthesis of **58–60**, **62** <sup>51</sup>

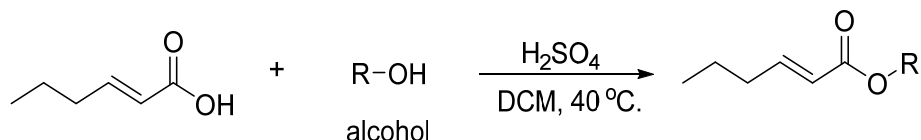

To a solution of (*E*)-hex-2-enoic acid (570.7 mg, 5 mmol) in a mixture of DCM (20.0 mL) and alcohol (3.0 mL) at 0 °C, H<sub>2</sub>SO<sub>4</sub> (50.0 mg, 0.5 mmol, 98 wt%) was added dropwise under stirring over 60 s. Then, the reaction mixture was stirred for 4 hours at 40 °C. After addition of DCM (20.0 mL) and H<sub>2</sub>O (10.0 mL), the reaction mixture was extracted with DCM (3×20.0 mL). The combined organic layers were then dried over Na<sub>2</sub>SO<sub>4</sub>, and filtered. After concentration, the residue was purified by flash column chromatography on silica gel (gradient elution: petroleum ether/EtOAc = 200:1-100:1) to give **58–60**, **62**.

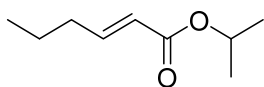

**Isopropyl (*E*)-hex-2-enoate (**58**)** <sup>93</sup> was synthesized according to procedure **7.10** as a colorless liquid (742.1 mg, 95% yield). <sup>1</sup>H NMR (400 MHz, CDCl<sub>3</sub>) δ (ppm): 6.93 (dt, *J* = 15.6, 6.8 Hz, 1H), 5.78 (dt, *J* = 16.0, 1.6 Hz, 1H), 5.04 (hept, *J* = 6.4 Hz, 1H), 2.19–2.12 (m, 2H), 1.47 (sext, *J* = 7.2 Hz, 2H), 1.25 (d, *J* = 6.4 Hz, 6H), 0.92 (t, *J* = 7.2 Hz, 3H); <sup>13</sup>C NMR (101 MHz, CDCl<sub>3</sub>) δ (ppm): 166.4, 149.0, 122.0, 67.5, 34.3, 22.0, 21.4, 13.8.

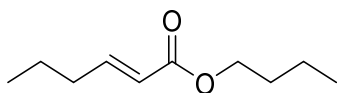

**Butyl (*E*)-hex-2-enoate (**59**)** was synthesized according to procedure **7.10** as a colorless liquid (672.9 mg, 79% yield). <sup>1</sup>H NMR (400 MHz, CDCl<sub>3</sub>) δ (ppm): 6.92 (dt, *J* = 15.6, 7.2 Hz, 1H), 5.78 (dt, *J* = 15.6, 1.6 Hz, 1H), 4.10 (t, *J* = 6.8 Hz, 2H), 2.18–2.10 (m, 2H), 1.65–1.56 (m, 2H), 1.46 (sext, *J* = 7.2 Hz, 2H), 1.41–1.31 (m, 2H), 0.94–0.88 (m, 6H); <sup>13</sup>C NMR (101 MHz, CDCl<sub>3</sub>) δ (ppm): 166.9, 149.1, 121.5, 64.1, 34.3, 30.9, 21.4, 19.3, 13.8, 13.7.

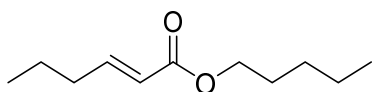

**Pentyl (*E*)-hex-2-enoate (60)** was synthesized according to procedure 7.10 as a colorless liquid (700.3 mg, 76% yield). <sup>1</sup>H NMR (400 MHz, CDCl<sub>3</sub>) δ (ppm): 6.93 (dt, *J* = 15.6, 7.2 Hz, 1H), 5.79 (dt, *J* = 15.6, 1.6 Hz, 1H), 4.09 (t, *J* = 6.8 Hz, 2H), 2.18–2.11 (m, 2H), 1.67–1.59 (m, 2H), 1.47 (sext, *J* = 7.2 Hz, 2H), 1.36–1.29 (m, 4H), 0.94–0.86 (m, 6H); <sup>13</sup>C NMR (101 MHz, CDCl<sub>3</sub>) δ (ppm): 166.9, 149.2, 121.5, 64.4, 34.3, 28.5, 28.2, 22.4, 21.4, 14.0, 13.7.

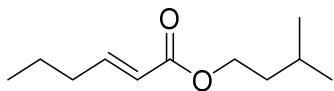

**Isopentyl (*E*)-hex-2-enoate (62)** was synthesized according to procedure 7.10 as a colorless liquid (737.1 mg, 80% yield). <sup>1</sup>H NMR (400 MHz, CDCl<sub>3</sub>) δ (ppm): 6.93 (dt, *J* = 15.6, 7.2 Hz, 1H), 5.79 (dt, *J* = 15.6, 1.6 Hz, 1H), 4.14 (t, *J* = 6.8 Hz, 2H), 2.19–2.12 (m, 2H), 1.69 (hept, *J* = 6.8 Hz, 1H), 1.56–1.43 (m, 4H), 0.94–0.88 (m, 9H); <sup>13</sup>C NMR (101 MHz, CDCl<sub>3</sub>) δ (ppm): 167.0, 149.2, 121.6, 63.0, 37.6, 34.3, 25.2, 22.6, 21.4, 13.8.

#### 7.11 Synthesis of 67, 68, 115–119<sup>94</sup>

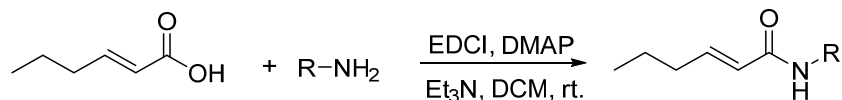

(*E*)-Hex-2-enoic acid (1.37 g, 12.0 mmol, 1.2 equiv.), an amine or amino acid derivative hydrochloride (10.0 mmol, 1.0 equiv.), 1-(3-Dimethylaminopropyl)-3-ethylcarbodiimide hydrochloride (EDCI, 2.76 g, 14.4 mmol, 1.44 equiv.), *N,N*-dimethylpyridin-4-amine (DMAP, 427.5 mg, 3.5 mmol, 0.35 equiv.), and DCM (30.0 mL) were added into a 100 mL round flask equipped with a magnetic stirring bar. The reaction mixture was stirred rapidly and then NEt<sub>3</sub> (4.16 mL, 30 mmol, 3.0 equiv.) was added. After the reaction was complete, deionized water (20 mL) and DCM (20 mL) were added to the reaction mixture. The organic layer was separated, and the aqueous layer was extracted with dichloromethane (3×20.0 mL) three times. The combined organic layers were washed with brine and dried over Na<sub>2</sub>SO<sub>4</sub>. After concentration, the residue was purified through flash column chromatography (petroleum ether /EtOAc = 5:1 to 3:1) to give the desired product **67, 68, 115–119**.

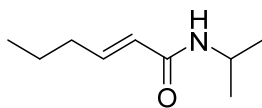

**(*E*)-*N*-Isopropylhex-2-enamide (67)**<sup>94</sup> was synthesized according to procedure 7.11 as a white solid (1.38 g, 89% yield). <sup>1</sup>H NMR (400 MHz, CDCl<sub>3</sub>) δ (ppm): 6.76 (dt, *J* = 15.6, 7.2 Hz, 1H), 5.74 (dt, *J* = 15.2, 1.6 Hz, 1H), 5.72 (brs, 1H), 4.17–4.04 (m, 1H), 2.13–2.06 (m, 2H), 1.42 (sext, *J* = 7.2 Hz, 2H), 1.13 (d, *J* = 6.4 Hz, 6H), 0.88 (t, *J* = 7.2 Hz, 3H); <sup>13</sup>C NMR (101 MHz, CDCl<sub>3</sub>) δ (ppm): 165.4, 144.1, 124.2, 41.3, 34.1, 22.8, 21.6, 13.8.

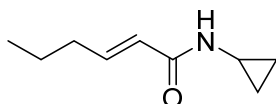

**(*E*)-*N*-Cyclopropylhex-2-enamide (68)** was synthesized according to procedure 7.11 as a white solid (1.39 g, 91% yield). <sup>1</sup>H NMR (400 MHz, CDCl<sub>3</sub>) δ (ppm): 6.83–6.75 (m, 1H), 6.12 (brs, 1H), 5.73 (d, *J* = 15.2 Hz, 1H), 2.77–2.72 (m, 1H), 2.13–2.07 (m, 2H), 1.47–1.39 (m, 2H), 0.93–0.86 (m, 3H), 0.78–0.71 (m, 2H), 0.53–0.48 (m, 2H); <sup>13</sup>C NMR (101 MHz, CDCl<sub>3</sub>) δ (ppm): 167.7, 144.4, 123.7, 34.1, 22.7, 21.6, 13.8, 6.6.

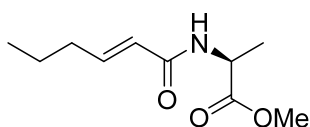

**Methyl (*E*)-hex-2-enoyl-*L*-alaninate (115)** was synthesized according to procedure 7.11 as a white solid (1.87 g, 94% yield). <sup>1</sup>H NMR (400 MHz, CDCl<sub>3</sub>) δ (ppm): 6.83 (dt, *J* = 15.6, 7.2 Hz, 1H), 6.19 (brs, 1H), 5.80 (dt, *J* = 15.6, 1.6 Hz, 1H), 4.65 (quint, *J* = 7.2 Hz, 1H), 3.73 (s, 3H), 2.17–2.09 (m, 2H), 1.45 (sext, *J* = 7.6 Hz, 2H), 1.41 (d, *J* = 7.2 Hz, 3H), 0.90 (t, *J* = 7.2 Hz, 3H); <sup>13</sup>C NMR (101 MHz, CDCl<sub>3</sub>) δ (ppm): 173.8, 165.5, 145.6, 123.3, 52.6, 48.0, 34.2, 21.5, 18.7, 13.8; Chiral HPLC trace (chiralpak AD-H column, *n*-hexane: isopropanol = 90:10; flow rate = 0.5 mL/min): *t*<sub>major</sub> = 15.37 min., *t*<sub>minor</sub> = 13.85 min.; >99% ee.

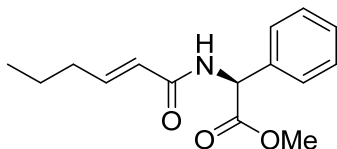

**Methyl (*S,E*)-2-(hex-2-enamido)-2-phenylacetate (116)** was synthesized according to procedure 7.11 as a white solid (2.35 g, 90% yield). <sup>1</sup>H NMR (400 MHz, CDCl<sub>3</sub>) δ (ppm): 7.39–7.28 (m, 5H), 6.86 (dt, *J* = 15.2, 6.8 Hz, 1H), 6.50 (brs, 1H), 5.84 (d, *J* = 15.2 Hz, 1H), 5.66 (d, *J* = 7.2 Hz, 1H), 3.73 (s, 3H), 2.18–2.11 (m, 2H), 1.46 (sext, *J* = 7.2 Hz, 2H), 0.91 (t, *J* = 7.2 Hz, 3H); <sup>13</sup>C

**NMR** (101 MHz, CDCl<sub>3</sub>)  $\delta$  (ppm): 171.7, 165.3, 146.1, 136.8, 129.1, 128.6, 127.4, 123.0, 56.5, 52.9, 34.2, 21.5, 13.8.

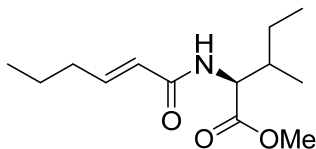

**Methyl (2S)-2-((E)-hex-2-enamido)-3-methylpentanoate (117)** was synthesized according to procedure 7.11 as a white solid (2.17 g, 90% yield). <sup>1</sup>H NMR (400 MHz, CDCl<sub>3</sub>)  $\delta$  (ppm): 6.80 (dt, *J* = 15.2, 6.8 Hz, 1H), 6.23 (d, *J* = 8.8 Hz, 1H), 5.81 (dt, *J* = 15.2, 1.6 Hz, 1H), 4.63 (dd, *J* = 8.4, 5.2 Hz, 1H), 3.68 (s, 3H), 2.13–2.06 (m, 2H), 1.90–1.79 (m, 1H), 1.46–1.35 (m, 3H), 1.20–1.07 (m, 1H), 0.89–0.83 (m, 9H); <sup>13</sup>C NMR (101 MHz, CDCl<sub>3</sub>)  $\delta$  (ppm): 172.8, 165.8, 145.4, 123.3, 56.3, 52.0, 38.1, 34.1, 25.3, 21.4, 15.4, 13.7, 11.5.

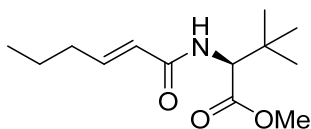

**Methyl (S, E)-2-(hex-2-enamido)-3,3-dimethylbutanoate (118)** was synthesized according to procedure 7.11 as a white solid (2.22 g, 92% yield). <sup>1</sup>H NMR (400 MHz, CDCl<sub>3</sub>)  $\delta$  (ppm): 6.85 (dt, *J* = 15.2, 7.2 Hz, 1H), 5.99 (d, *J* = 8.4 Hz, 1H), 5.82 (d, *J* = 15.2 Hz, 1H), 4.56 (d, *J* = 9.6 Hz, 1H), 3.71 (s, 3H), 2.15 (q, *J* = 7.2 Hz, 2H), 1.47 (sext, *J* = 7.2 Hz, 2H), 0.97 (s, 9H), 0.92 (t, *J* = 7.2 Hz, 3H); <sup>13</sup>C NMR (101 MHz, CDCl<sub>3</sub>)  $\delta$  (ppm): 172.5, 165.8, 145.8, 123.4, 59.9, 51.9, 35.0, 34.2, 26.7, 21.5, 13.8.

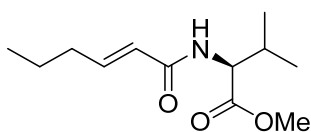

**Methyl (E)-hex-2-enoyl-L-valinate (119)** was synthesized according to procedure 7.11 as a white solid (2.07 g, 91% yield). <sup>1</sup>H NMR (400 MHz, CDCl<sub>3</sub>)  $\delta$  (ppm): 6.86 (dt, *J* = 15.2, 7.2 Hz, 1H), 5.96 (d, *J* = 8.8 Hz, 1H), 5.83 (dt, *J* = 15.2, 1.6 Hz, 1H), 4.64 (dd, *J* = 8.4, 4.8 Hz, 1H), 3.73 (s, 3H), 2.22–2.11 (m, 3H), 1.46 (sext, *J* = 7.2 Hz, 2H), 0.96–0.89 (m, 9H); <sup>13</sup>C NMR (101 MHz, CDCl<sub>3</sub>)  $\delta$  (ppm): 172.9, 166.0, 145.7, 123.4, 57.1, 52.3, 34.2, 31.6, 21.6, 19.1, 13.8.

## 7.12 Synthesis of *tert*-butyl (*R*)-(4-phenylbutan-2-yl)carbamate (100)<sup>95, 96</sup>



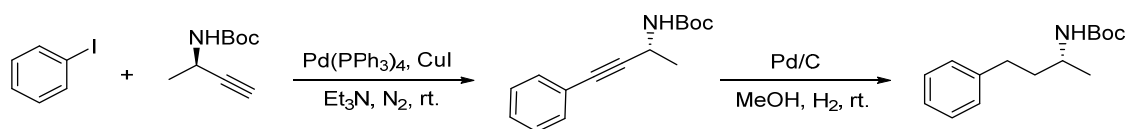

*tert*-Butyl (*R*)-but-3-yn-2-ylcarbamate (846 mg, 5.0 mmol, 1 equiv.), tetrakis(triphenylphosphine) palladium (173.3 mg, 0.15 mmol, 3 mol%) and cuprous iodide (29 mg, 0.15 mmol, 3 mol%) were placed in a 100 mL Schlenk reaction tube equipped with a magnetic stirring bar. Then, iodobenzene (0.73 mL, 6.5 mmol, 1.3 equiv.) and triethylamine (20.0 mL) were added under a nitrogen atmosphere, and the mixture was stirred overnight at room temperature. After the reaction was complete, deionized water (20.0 mL) and ethyl acetate (20.0 mL) were added to the reaction mixture. The organic layer was separated, and the aqueous layer was extracted with ethyl acetate (3×20.0 mL) three times. The combined organic layers were washed with brine and dried over Na<sub>2</sub>SO<sub>4</sub>. After concentration, the residue was purified on silica gel chromatography (petroleum ether/EtOAc=10:1) to give the desired product *tert*-butyl (*R*)-(4-phenylbut-3-yn-2-yl)carbamate (1.13 g, 92% yield).

***tert*-Butyl (*R*)-(4-phenylbutan-2-yl)carbamate** was prepared according to the following procedure: *tert*-butyl (*R*)-(4-phenylbut-3-yn-2-yl)carbamate (1.13 g) and palladium-carbon (159.6 mg, 15 mol%) were added to a reactor, methanol was then added (30 mL), and the reactor was degassed with hydrogen gas, filled with 40 bar hydrogen, and heated in a 30 °C water bath with stirring for 1 day. The residue was purified through flash column chromatography (petroleum ether /EtOAc=10:1 to 4:1) to give the desired product **100** (1.08 g, 87% yield). <sup>1</sup>H NMR (400 MHz, CDCl<sub>3</sub>) δ (ppm): 7.30–7.25 (m, 2H), 7.20–7.15 (m, 3H), 4.35 (brs, 1H), 3.74–3.69 (m, 1H), 2.70–2.60 (m, 2H), 1.76–1.68 (m, 2H), 1.45 (s, 9H), 1.16 (d, *J* = 6.4 Hz, 3H); <sup>13</sup>C NMR (101 MHz, CDCl<sub>3</sub>) δ (ppm): 154.8, 131.8, 128.37, 128.35, 122.9, 90.0, 82.2, 80.0, 39.2, 28.5, 23.1.

### 7.13 Synthesis of 101–103 <sup>97-98</sup>

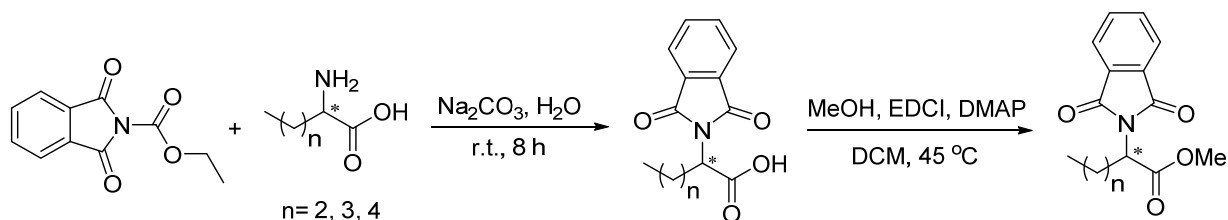

To a round flask equipped with a magnetic stirring bar was added the corresponding amino acid (10 mmol, 1.0 equiv.), *N*-ethoxycarbonylphthalimide (2.2 g, 10 mmol, 1equiv.), Na<sub>2</sub>CO<sub>3</sub> (1.06 g,

10 mmol, 1.0 equiv.), and water (20.0 mL). The resulting mixture was stirred at room temperature for 8 h and acidified with aqueous HCl until precipitates were slowly generated. When no precipitate was generated further, the crude mixture was extracted with EtOAc (30.0 mL), and concentrated under reduced pressure. The residue was then purified by flash column chromatography (petroleum ether /EtOAc=10:1 to 4:1) to afford protected an amino acid.

Then, the protected amino acid (5.0 mmol, 1 equiv.), 1-(3-dimethylaminopropyl)-3-ethylcarbodiimide hydrochloride (EDCI, 1.25 g, 6.5 mmol, 1.3 equiv.), *N,N*-dimethylpyridin-4-amine (DMAP, 153 mg, 1.25 mmol, 0.25 equiv.), and DCM (20.0 mL) were added into a 100 mL round flask equipped with a magnetic stirring bar. The reaction mixture was stirred rapidly and then MeOH (3.0 mL) was added. After the reaction was complete, deionized water (10.0 mL) and DCM (10 mL) were added to the reaction mixture. The organic layer was separated, and the aqueous layer was extracted with dichloromethane (3×15.0 mL) three times. The combined organic layers were washed with brine and dried over Na<sub>2</sub>SO<sub>4</sub>. After concentration, the residue was purified through flash column chromatography (petroleum ether /EtOAc=5:1 to 3:1) to give the desired product **101–103**.

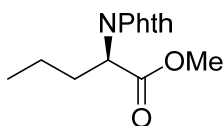

**Methyl (*R*)-2-(1,3-dioxoisindolin-2-yl)pentanoate (101)**<sup>99</sup> was synthesized according to procedure **7.13** as a white solid (1.20 g, 92% yield); <sup>1</sup>H NMR (400 MHz, CDCl<sub>3</sub>) δ (ppm): 7.88–7.84 (m, 2H), 7.75–7.72 (m, 2H), 4.86 (dd, *J* = 10.8, 4.8 Hz, 1H), 3.72 (s, 3H), 2.33–2.21 (m, 1H), 2.20–2.11 (m, 1H), 1.37–1.25 (m, 2H), 0.92 (t, *J* = 7.2 Hz, 3H); <sup>13</sup>C NMR (101 MHz, CDCl<sub>3</sub>) δ (ppm): 170.1, 167.8, 134.3, 131.9, 123.6, 52.8, 52.0, 30.8, 19.7, 13.5.

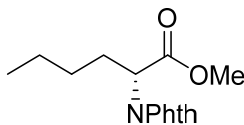

**Methyl (*R*)-2-(1,3-dioxoisindolin-2-yl)hexanoate (102)**<sup>100</sup> was synthesized according to procedure **7.13** as a white solid (1.25 g, 91% yield); <sup>1</sup>H NMR (400 MHz, CDCl<sub>3</sub>) δ (ppm): 7.87–7.84 (m, 2H), 7.76–7.72 (m, 2H), 4.84 (dd, *J* = 10.4, 5.2 Hz, 1H), 3.72 (s, 3H), 2.31–2.15 (m, 2H), 1.41–1.21 (m, 4H), 0.86 (t, *J* = 7.2 Hz, 3H); <sup>13</sup>C NMR (101 MHz, CDCl<sub>3</sub>) δ (ppm): 170.1, 167.8, 134.3, 131.9, 123.7, 52.8, 52.3, 28.54, 28.49, 22.2, 14.0.

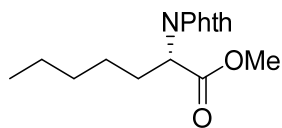

**Methyl (S)-2-(1,3-dioxisoindolin-2-yl)heptanoate (103)**<sup>101</sup> was synthesized according to procedure 7.13 as a white solid (1.30 g, 90% yield); <sup>1</sup>H NMR (400 MHz, CDCl<sub>3</sub>) δ (ppm): 7.88–7.84 (m, 2H), 7.51–7.72 (m, 2H), 4.84 (dd, *J* = 10.4, 5.2 Hz, 1H), 3.72 (s, 3H), 2.27–2.16 (m, 2H), 1.33–1.23 (m, 6H), 0.83 (t, *J* = 7.2 Hz, 3H); <sup>13</sup>C NMR (101 MHz, CDCl<sub>3</sub>) δ (ppm): 170.1, 167.9, 134.3, 131.9, 123.7, 52.8, 52.3, 31.2, 28.7, 26.1, 22.5, 14.1.

#### 7.14 Synthesis of methyl (S)-2-(4-chlorobenzamido)hexanoate (104)<sup>102</sup>

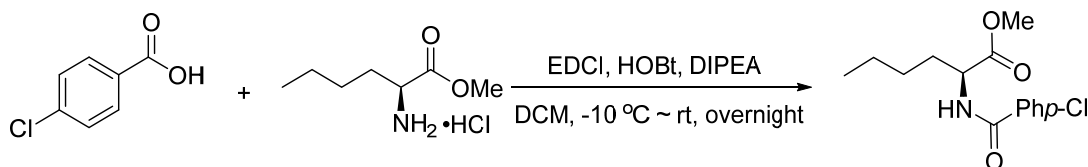

To a round flask equipped with a magnetic stirring bar was added 4-chlorobenzoic acid (1.72 g, 11.0 mmol, 1.1 equiv), methyl (S)-2-aminohexanoate hydrochloride (1.82 g, 10 mmol), EDCI (2.1 g, 11.0 mmol, 1.1 equiv), HOBT (1.49 g, 11.0 mmol, 1.1 equiv), and DIPEA (3.88 g, 30 mmol, 3.0 equiv) in DCM (40.0 mL). The resulting mixture was stirred at -10 °C for 2 hours, and then warmed to room temperature overnight. Upon reaction completion, water (20.0 mL) was added and the mixture was extracted with DCM (3×20.0 mL) three times. The combined organic layers were washed with brine and dried over Na<sub>2</sub>SO<sub>4</sub>. After concentration, the residue was purified on silica gel chromatography (petroleum ether /EtOAc=50:1) to give the desired product **104** (2.55 g, 90% yield). <sup>1</sup>H NMR (400 MHz, CDCl<sub>3</sub>) δ (ppm): 7.76–7.71 (m, 2H), 7.42–7.36 (m, 2H), 6.68 (brs, 1H), 4.78 (dd, *J* = 13.2, 7.2 Hz, 1H), 3.77 (s, 3H), 1.99–1.87 (m, 1H), 1.81–1.70 (m, 1H), 1.42–1.23 (m, 4H), 0.89 (t, *J* = 6.8 Hz, 3H); <sup>13</sup>C NMR (101 MHz, CDCl<sub>3</sub>) δ (ppm): 173.4, 166.1, 138.1, 132.5, 129.0, 128.7, 52.8, 52.6, 32.4, 27.5, 22.5, 14.0.

#### 7.15 Synthesis of 105-108, 110<sup>102</sup>

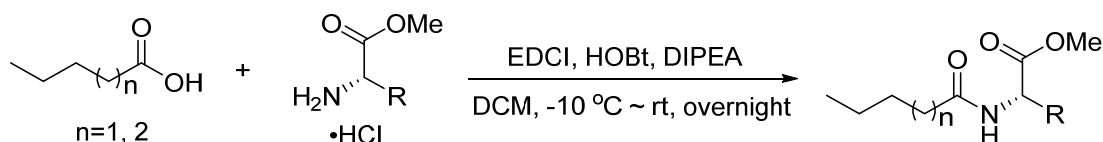

To a round flask equipped with a magnetic stirring bar was added valeric acid or hexanoic acid (11.0 mmol, 1.1 equiv), amino acid methyl ester hydrochloride (10 mmol), EDCI (2.1 g, 11.0 mmol, 1.1 equiv), HOBt (1.49 g, 11.0 mmol, 1.1 equiv), and DIPEA (3.88 g, 30 mmol, 3.0 equiv) in DCM (40.0 mL). The resulting mixture was stirred at  $-10\text{ }^{\circ}\text{C}$  for 2 hours, and then warmed to room temperature overnight. Upon reaction completion, water (20.0 mL) was added and the mixture was extracted with DCM ( $3\times 20.0\text{ mL}$ ) three times. The combined organic layers were washed with brine and dried over  $\text{Na}_2\text{SO}_4$ . After concentration, the residue was purified on silica gel chromatography (petroleum ether /EtOAc = 50:1) to give the desired product **105-108, 110**.

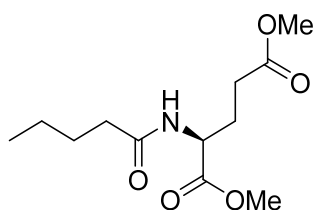

**Dimethyl pentanoyl-*L*-glutamate (105)** was synthesized according to procedure **7.15** as a white solid (2.31 g, 89% yield);  $^1\text{H NMR}$  (400 MHz,  $\text{CDCl}_3$ )  $\delta$  (ppm): 6.31 (brs, 1H), 4.57 (dd,  $J = 12.8$ , 7.6 Hz, 1H), 3.69 (s, 3H), 3.62 (s, 3H), 2.43–2.26 (m, 2H), 2.20–2.09 (m, 3H), 1.99–1.88 (m, 1H), 1.56 (quint,  $J = 7.6$  Hz, 2H), 1.29 (sext,  $J = 7.6$  Hz, 2H), 0.86 (t,  $J = 7.2$  Hz, 3H);  $^{13}\text{C NMR}$  (101 MHz,  $\text{CDCl}_3$ )  $\delta$  (ppm): 173.3, 173.2, 172.5, 52.4, 51.8, 51.5, 36.2, 30.1, 27.7, 27.3, 22.3, 13.8.

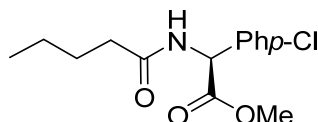

**Methyl (S)-2-(4-chlorophenyl)-2-pentanamidoacetate (106)** was synthesized according to procedure **7.15** as a white solid (2.50 g, 88% yield);  $^1\text{H NMR}$  (400 MHz,  $\text{CDCl}_3$ )  $\delta$  (ppm): 7.35–7.26 (m, 4H), 6.53 (brs, 1H), 5.56 (d,  $J = 7.2$  Hz, 2H), 3.73 (s, 3H), 2.24 (td,  $J = 7.6$ , 2.0 Hz, 2H), 1.61 (quint,  $J = 7.6$  Hz, 2H), 1.33 (sext,  $J = 7.6$  Hz, 2H), 0.90 (t,  $J = 7.2$  Hz, 3H);  $^{13}\text{C NMR}$  (101 MHz,  $\text{CDCl}_3$ )  $\delta$  (ppm): 172.6, 171.3, 135.5, 134.6, 129.2, 128.7, 55.8, 53.1, 36.2, 27.6, 22.4, 13.9.

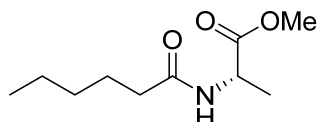

**Methyl hexanoyl-*L*-alaninate (107)** was synthesized according to procedure 7.15 as a white solid (1.87 g, 93% yield);  $^1\text{H}$  NMR (400 MHz,  $\text{CDCl}_3$ )  $\delta$  (ppm): 6.03 (brs, 1H), 4.60 (quint,  $J = 7.2$  Hz, 1H), 3.74 (s, 3H), 2.19 (t,  $J = 7.6$  Hz, 2H), 1.63 (quint,  $J = 7.6$  Hz, 2H), 1.39 (d,  $J = 7.2$  Hz, 3H), 1.33–1.26 (m, 4H), 0.88 (t,  $J = 6.8$  Hz, 3H);  $^{13}\text{C}$  NMR (101 MHz,  $\text{CDCl}_3$ )  $\delta$  (ppm): 173.9, 172.8, 52.6, 48.0, 36.7, 31.5, 25.4, 22.5, 18.7, 14.1.

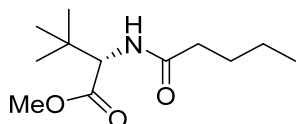

**Methyl (S)-3,3-dimethyl-2-pentanamidobutanoate (108)** was synthesized according to procedure 7.15 as a white solid (2.18 g, 95% yield);  $^1\text{H}$  NMR (400 MHz,  $\text{CDCl}_3$ )  $\delta$  (ppm): 6.01 (brs, 1H), 4.45 (d,  $J = 9.2$  Hz, 1H), 3.67 (s, 3H), 2.19 (t,  $J = 7.2$  Hz, 2H), 1.58 (quint,  $J = 7.6$  Hz, 2H), 1.31 (sext,  $J = 7.6$  Hz, 2H), 0.92 (s, 9H), 0.87 (t,  $J = 7.2$  Hz, 3H);  $^{13}\text{C}$  NMR (101 MHz,  $\text{CDCl}_3$ )  $\delta$  (ppm): 172.9, 172.4, 59.8, 51.7, 36.5, 34.7, 27.8, 26.6, 22.4, 13.8.

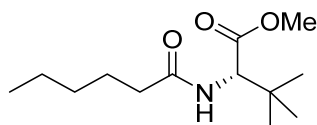

**Methyl (S)-2-hexanamido-3,3-dimethylbutanoate (110)** was synthesized according to procedure 7.15 as a white solid (2.21 g, 91% yield);  $^1\text{H}$  NMR (400 MHz,  $\text{CDCl}_3$ )  $\delta$  (ppm): 5.95 (brs, 1H), 4.48 (d,  $J = 9.2$  Hz, 1H), 3.71 (s, 3H), 2.21 (t,  $J = 7.6$  Hz, 2H), 1.63 (quint,  $J = 7.2$  Hz, 2H), 1.34–1.25 (m, 4H), 0.96 (s, 9H), 0.88 (t,  $J = 6.8$  Hz, 3H);  $^{13}\text{C}$  NMR (101 MHz,  $\text{CDCl}_3$ )  $\delta$  (ppm): 172.9, 172.5, 59.8, 51.9, 36.9, 34.8, 31.5, 26.7, 25.5, 22.5, 14.0.

#### 7.16 Synthesis of methyl (*R*)-2-((*tert*-butoxycarbonyl)amino)-3-cyclopentylpropa-noate (109)<sup>103</sup>

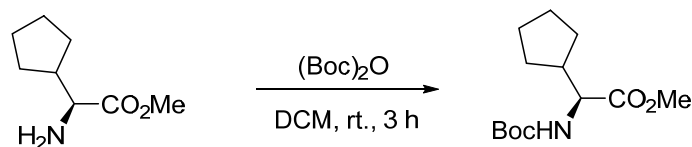

To a sealed tube equipped with a magnetic stir bar was added methyl (*R*)-2-amino-2-cyclopentylacetate (786.0 mg, 5 mmol, 1.0 equiv.), Boc anhydride (1.38 mL, 6.0 mmol, 1.2 equiv.) and DCM (20 mL). Then, the reaction mixture was stirred at room temperature for 3 hours. After addition of DCM (20.0 mL) and  $\text{H}_2\text{O}$  (10.0 mL), the reaction mixture was extracted with DCM (3×20.0 mL). The combined organic layers were then dried over  $\text{Na}_2\text{SO}_4$ . After concentration,

the crude product **109** (1.22 g, 95% yield) was obtained without further purification.  $^1\text{H}$  NMR (400 MHz,  $\text{CDCl}_3$ )  $\delta$  (ppm): 5.00 (brs, 1H), 4.20 (t,  $J = 3.2$  Hz, 1H), 3.70 (s, 3H), 2.21–2.09 (m, 1H), 1.70–1.58 (m, 4H), 1.56–1.48 (m, 2H), 1.41 (s, 9H), 1.38–1.26 (m, 2H);  $^{13}\text{C}$  NMR (101 MHz,  $\text{CDCl}_3$ )  $\delta$  (ppm): 173.5, 155.7, 79.9, 56.7, 52.1, 42.8, 29.0, 28.4, 25.4.

#### 7.17 Synthesis of methyl 1-((*tert*-butoxycarbonyl)amino)cyclopentane-1-carboxylate (**111**)<sup>104</sup>

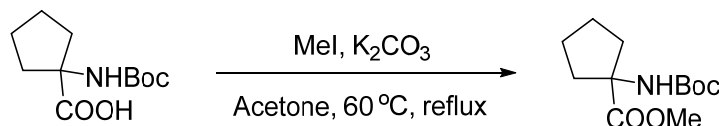

A solution of 1-((*tert*-butoxycarbonyl)amino)cyclopentane-1-carboxylic acid (1.146 g, 5 mmol, 1 equiv.) and potassium carbonate (1.728 g, 12.5 mmol, 2.5 equiv.) in 30 mL acetone was prepared. Methyl iodide (0.47 mL, 7.5 mmol, 1.5 equiv.) was slowly added and the reaction mixture was warmed up to 60 °C and stirred for 2 hours. After addition of 15.0 mL ethyl ether and 20.0 mL  $\text{H}_2\text{O}$ , the reaction mixture was extracted with ethyl ether (3x15 mL). The combined organic layers were then dried over  $\text{Na}_2\text{SO}_4$ , and filtered. After concentration, the crude product **111** (colorless liquid, 1.2 g, 98% yield) was obtained without further purification.  $^1\text{H}$  NMR (400 MHz,  $\text{CDCl}_3$ )  $\delta$  (ppm): 4.85 (brs, 1H), 3.72 (s, 3H), 2.25–2.13 (m, 2H), 1.92–1.85 (m, 2H), 1.79–1.73 (m, 4H), 1.43 (s, 9H);  $^{13}\text{C}$  NMR (101 MHz,  $\text{CDCl}_3$ )  $\delta$  (ppm): 175.4, 155.3, 66.2, 52.4, 38.4, 37.9, 28.4, 24.7.

#### 7.18 Synthesis of methyl (*R*)-2-((*tert*-butoxycarbonyl)amino)-4-phenylbutanoate (**113**)<sup>98</sup>

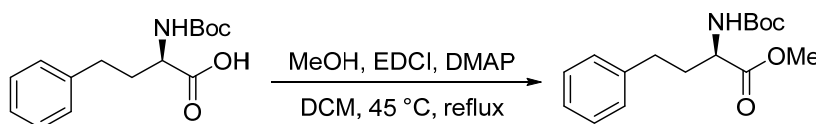

(*R*)-2-((*tert*-Butoxycarbonyl)amino)-4-phenylbutanoic acid (1.40 g, 5.0 mmol, 1.0 equiv.), 1-(3-dimethylaminopropyl)-3-ethylcarbodiimide hydrochloride (EDCI, 1.25 g, 6.5 mmol, 1.3 equiv.), *N,N*-dimethylpyridin-4-amine (DMAP, 153 mg, 1.25 mmol, 0.25 equiv.), and DCM (20.0 mL) were added into a 100 mL round flask equipped with a magnetic stirring bar. The reaction mixture was stirred rapidly and then MeOH (3.0 mL) was added. Upon reaction completion, water (20.0 mL) was added and the mixture was extracted with DCM (3×20.0 mL) three times. The combined organic layers were then dried over  $\text{Na}_2\text{SO}_4$ . After concentration, the residue was purified through flash column chromatography (petroleum ether /EtOAc=10:1 to 4:1) to give the desired product

**113**<sup>105</sup> (colorless liquid, 1.39 g, 95% yield). <sup>1</sup>H NMR (400 MHz, CDCl<sub>3</sub>) δ (ppm): 7.31–7.25 (m, 2H), 7.22–7.15 (m, 3H), 5.04 (brs, 1H), 4.37–4.35 (m, 1H), 3.72 (s, 3H), 2.70–2.64 (m, 2H), 2.20–2.09 (m, 1H), 2.00–1.89 (m, 1H), 1.46 (s, 9H); <sup>13</sup>C NMR (101 MHz, CDCl<sub>3</sub>) δ (ppm): 173.2, 155.5, 140.9, 128.6, 128.5, 126.2, 80.0, 53.3, 52.3, 34.4, 31.7, 28.4.

#### 7.19 Synthesis of methyl (*R*)-2-((*tert*-butoxycarbonyl)amino)-4-phenylbutanoate (**114**)<sup>95, 96</sup>

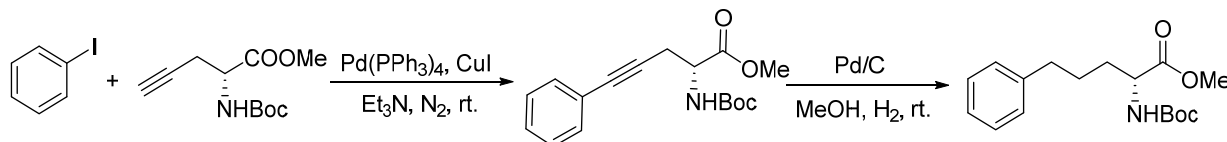

Methyl (*R*)-2-((*tert*-butoxycarbonyl)amino)pent-4-ynoate (1136 mg, 5.0 mmol, 1.0 equiv.), tetrakis(triphenylphosphine) palladium (173.0 mg, 0.15 mmol, 3 mol%) and cuprous iodide (29.0 mg, 0.15 mmol, 3 mol%) were placed in a 100 mL Schlenk reaction tube equipped with a magnetic stirring bar. Then, iodobenzene (0.73 mL, 6.5 mmol, 1.3 equiv.) and triethylamine (20.0 mL) were added under a nitrogen atmosphere, and the mixture was stirred overnight at room temperature. After the reaction was complete, deionized water (20.0 mL) and ethyl acetate (20.0 mL) were added to the reaction mixture. The organic layer was separated, and the aqueous layer was extracted with ethyl acetate (3×20.0 mL) three times. The combined organic layers were washed with brine and dried over Na<sub>2</sub>SO<sub>4</sub>. After concentration, the residue was purified on silica gel chromatography (petroleum ether /EtOAc=10:1) to give the desired product methyl (*R*)-2-((*tert*-butoxycarbonyl)amino)-5-phenylpent-4-ynoate (1.35 g, 89% yield).

The pure product methyl (*R*)-2-((*tert*-butoxycarbonyl)amino)-5-phenylpent-4-ynoate (1350.0 mg) and palladium-carbon (710 mg, 10 wt%, 15 mol%) were added to a reactor, methanol was then added (30 mL), and the reactor was degassed with hydrogen gas, filled with 40 bar hydrogen, and heated in a 30 °C water bath with stirring for one day. The residue was purified through flash column chromatography (petroleum ether /EtOAc=10:1 to 4:1) to give the desired product **114**<sup>106</sup> (1.20 g, 88%). <sup>1</sup>H NMR (400 MHz, CDCl<sub>3</sub>) δ (ppm): 7.28–7.23 (m, 2H), 7.19–7.12 (m, 3H), 5.12 (brs, 1H), 4.36–4.29 (m, 1H), 3.69 (s, 3H), 2.69–2.55 (m, 2H), 1.85–1.78 (m, 1H), 1.72–1.58 (m, 1H), 1.43 (s, 9H); <sup>13</sup>C NMR (101 MHz, CDCl<sub>3</sub>) δ (ppm): 173.3, 155.4, 141.7, 128.4, 128.3, 125.9, 79.8, 53.3, 52.2, 35.3, 32.2, 28.3, 27.1.

## 8. Synthesis of oximes from ketones to aid in product analysis

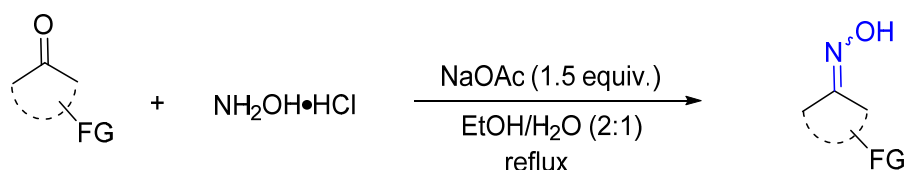

To a solution of ketone (1.0 equiv.) and hydroxylamine hydrochloride (1.5 equiv.) in ethanol/water (2:1) was added sodium acetate (1.5 equiv.) portion-wise. The reaction mixture was heated to reflux overnight, and then cooled to room temperature. Then, the reaction mixture was basified with  $\text{Na}_2\text{CO}_3$  powder. The filtrate was concentrated under reduced pressure to produce the crude product, which was purified through flash column chromatography (gradient elution: petroleum ether : EtOAc = 30:1 to 20:1) to give desired ketone oxime.

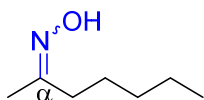

**(*E/Z*)-Heptan-2-one oxime (12a- $\alpha$ -oxime)** isomer mixtures (*E/Z* = 3:1):

**Major (*E*)-12a- $\alpha$ -oxime:**  $^1\text{H NMR}$  (400 MHz,  $\text{CDCl}_3$ )  $\delta$  (ppm): 8.06 (brs, 1H), 2.17 (t,  $J$  = 7.8 Hz, 2H), 1.88 (s, 3H), 1.54–1.46 (m, 2H), 1.35–1.25 (m, 4H), 0.88 (t,  $J$  = 7.2 Hz, 3H);  $^{13}\text{C NMR}$  (101 MHz,  $\text{CDCl}_3$ )  $\delta$  (ppm): 158.8, 35.9, 31.4, 26.0, 22.5, 14.1, 13.5.

**Minor (*Z*)-12a- $\alpha$ -oxime:**  $^1\text{H NMR}$  (400 MHz,  $\text{CDCl}_3$ )  $\delta$  (ppm): 8.06 (brs, 1H), 2.36 (t,  $J$  = 8.0 Hz, 2H), 1.86 (s, 3H), 1.54–1.46 (m, 2H), 1.35–1.25 (m, 4H), 0.89 (t,  $J$  = 7.2 Hz, 3H);  $^{13}\text{C NMR}$  (101 MHz,  $\text{CDCl}_3$ )  $\delta$  (ppm): 159.1, 32.0, 28.7, 25.3, 22.5, 21.0, 19.9.

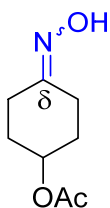

**4-(Hydroxyimino)cyclohexyl acetate (16a- $\delta$ -oxime):**  $^1\text{H NMR}$  (400 MHz,  $\text{CDCl}_3$ )  $\delta$  (ppm): 9.13 (brs, 1H), 5.03–4.96 (m, 1H), 2.80–2.72 (m, 1H), 2.51–2.39 (m, 2H), 2.27–2.19 (m, 1H), 2.06 (s, 3H), 1.96–1.85 (m, 2H), 1.83–1.72 (m, 2H);  $^{13}\text{C NMR}$  (101 MHz,  $\text{CDCl}_3$ )  $\delta$  (ppm): 170.7, 158.4, 70.4, 30.8, 29.5, 28.1, 21.4, 20.5.



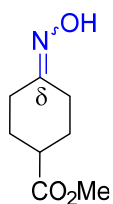

**Methyl 4-(hydroxyimino)cyclohexane-1-carboxylate (17a- $\delta$ -oxime):**  $^1\text{H}$  NMR (400 MHz,  $\text{CDCl}_3$ )  $\delta$  (ppm): 7.93 (brs, 1H), 3.68 (s, 3H), 3.13 (d,  $J = 13.6$  Hz, 1H), 2.56 (t,  $J = 10.4$  Hz, 1H), 2.45–2.39 (m, 1H), 2.18–1.99 (m, 4H), 1.79–1.67 (m, 2H);  $^{13}\text{C}$  NMR (101 MHz,  $\text{CDCl}_3$ )  $\delta$  (ppm): 175.2, 158.7, 51.9, 41.9, 30.3, 28.7, 27.4, 22.8.

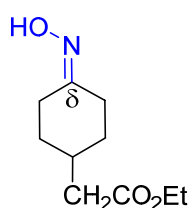

**Ethyl 2-(4-(hydroxyimino)cyclohexyl)acetate (18a- $\delta$ -oxime):**  $^1\text{H}$  NMR (400 MHz,  $\text{CDCl}_3$ )  $\delta$  (ppm): 4.13 (q,  $J = 7.2$  Hz, 2H), 3.27 (d,  $J = 14.0$  Hz, 1H), 2.39 (d,  $J = 14.0$  Hz, 1H), 2.24 (d,  $J = 7.2$  Hz, 2H), 2.17–2.01 (m, 2H), 1.95–1.78 (m, 3H), 1.25 (t,  $J = 6.8$  Hz, 3H), 1.25–1.15 (m, 2H);  $^{13}\text{C}$  NMR (101 MHz,  $\text{CDCl}_3$ )  $\delta$  (ppm): 172.7, 159.6, 60.4, 40.9, 34.0, 32.6, 31.5, 31.3, 23.4, 14.3.

## 9. General procedure for oximation of hydrocarbons

### General Procedure A:

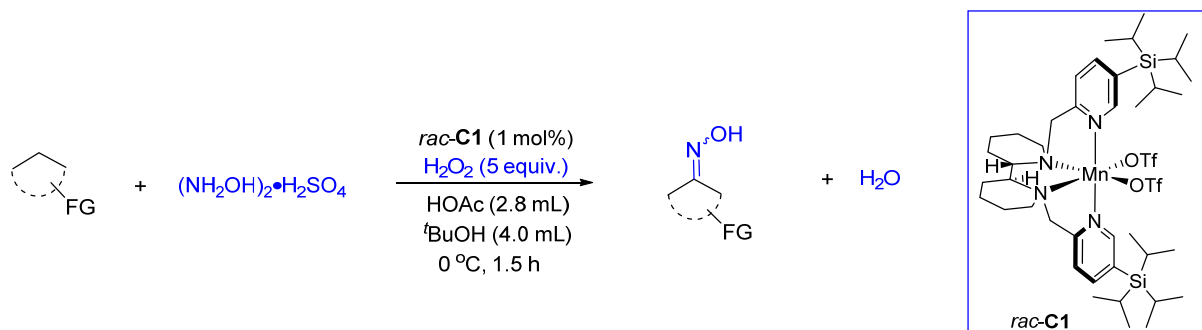

**Rac-C1** (10.2 mg, 1.0 mol%), hydroxylamine sulfate (328.3 mg, 2.0 mmol, 2.0 equiv.), a hydrocarbon substrate (1.0 mmol, 1.0 equiv.), AcOH (2.8 mL for functionalized alkanes and nonfunctionalized acyclic alkane; 1.2 mL for nonfunctionalized cyclic alkanes) and *t*BuOH (2.0 mL) were added to a reaction tube. The mixture was cooled down to 0 °C in a cryogenic bath, and then H<sub>2</sub>O<sub>2</sub> (5.0 equiv., 5.0 mmol, 567 µL, 30% wt. in H<sub>2</sub>O) in 2 mL of *t*BuOH was added with a syringe pump over 1 h under stirring at 0 °C without nitrogen protection. After stirring for an additional 30 min, the reaction mixture was quenched with Na<sub>2</sub>SO<sub>3</sub>. Next, the resulting mixture was basified with Na<sub>2</sub>CO<sub>3</sub> for 30 minutes at 0 °C in a cryogenic bath. After completion of the reaction, water (5.0 mL) was added, and the solution was extracted with DCM (3 × 15.0 mL). The combined organic phase was dried over anhydrous Na<sub>2</sub>SO<sub>4</sub> and concentrated under reduced pressure to produce the crude product, which was purified by flash column chromatography to afford the desired product.

Because of the volatility of the substrates **2** and **10-12**, the amount of substrate was increased to 5 mmol, and that of hydroxylamine sulfate was reduced to 0.5 mmol, with the ratio of substrate to hydroxylamine sulfate being 10:1. For the gaseous substrates **8** and **9**, the amount of substrate was in much excess to the hydroxylamine sulfate (0.5 mmol). All the other reaction conditions remained unchanged. For reactions of these substrates (**2**, **8-12**), hydroxylamine sulfate is the limiting reagent.

### General Procedure B:

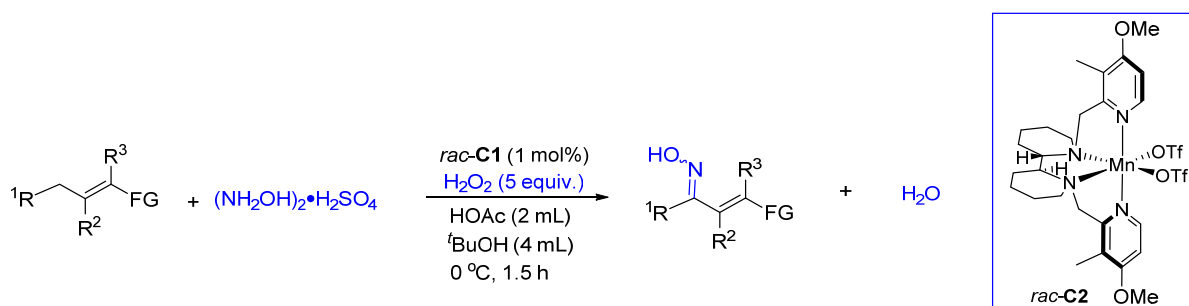

***Rac*-C2** (7.9 mg, 1.0 mol%), hydroxylamine sulfate (328.3 mg, 2.0 mmol, 2.0 equiv.), substrate (1.0 mmol, 1.0 equiv.), AcOH (2.0 mL), and *t*BuOH (2.0 mL) were added to a reaction tube. The mixture was cooled down to 0 °C in a cryogenic bath, and then H<sub>2</sub>O<sub>2</sub> (5.0 equiv., 5.0 mmol, 567 μL, 30% wt. in H<sub>2</sub>O) in 2 mL of *t*BuOH was added with a syringe pump over 1 h under stirring at 0 °C without nitrogen protection. After stirring for another 30 min, the reaction mixture was quenched with Na<sub>2</sub>SO<sub>3</sub>. Next, the resulting mixture was basified with Na<sub>2</sub>CO<sub>3</sub> for 30 minutes at 0 °C in a cryogenic bath. After completion of the reaction, water (5 mL) was added, and the solution was extracted with DCM (3 × 15 mL). The combined organic phase was dried over anhydrous Na<sub>2</sub>SO<sub>4</sub> and concentrated under reduced pressure to produce the crude product. The crude product was purified by flash column chromatography to afford the desired product.

### General Procedure C:

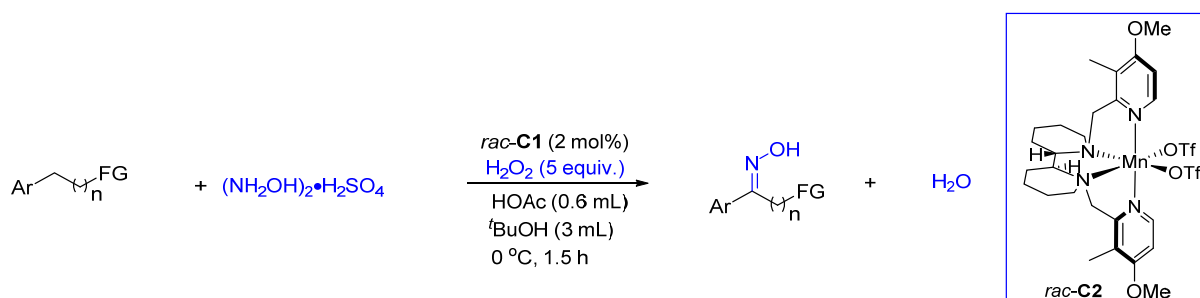

***Rac*-C2** (7.9 mg, 2.0 mol%), hydroxylamine sulfate (246.2 mg, 1.5 mmol, 3.0 equiv.), substrate (0.5 mmol, 1.0 equiv.), AcOH (0.6 mL), and *t*BuOH (1.0 mL) were added to a reaction tube. The mixture was cooled down to 0 °C in a cryogenic bath and then H<sub>2</sub>O<sub>2</sub> (2.5 mmol, 5 equiv., 284 μL, 30% wt. in H<sub>2</sub>O) in 0.5 mL of *t*BuOH was added with a syringe pump over 1 h under stirring at 0 °C without nitrogen protection. After stirring for another 30 min, the reaction mixture was quenched with Na<sub>2</sub>SO<sub>3</sub> solid. Next, the resulting mixture was basified with Na<sub>2</sub>CO<sub>3</sub> for 30 minutes at 50 °C. After completion of the reaction, water (5.0 mL) was added, and the solution was extracted with DCM (3 × 15.0 mL). The combined organic phase was dried over anhydrous

Na<sub>2</sub>SO<sub>4</sub> and concentrated under reduced pressure to produce the crude product. The crude product was purified by flash column chromatography to afford the desired product.

## 10. Gram-scale synthesis of cyclododecanone oxime

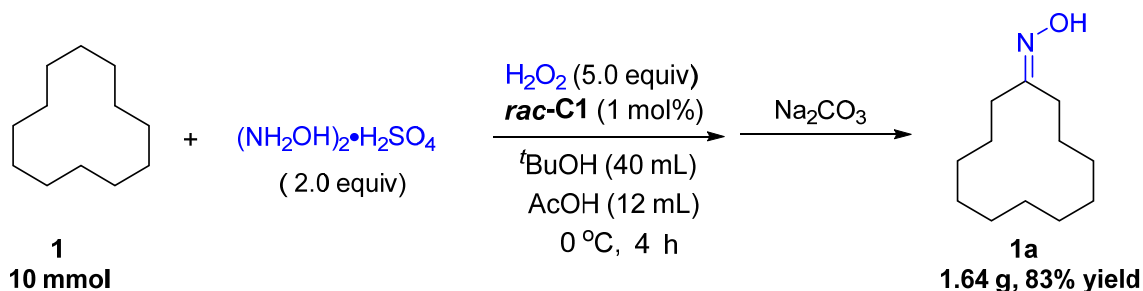

*Rac*-**C1** (100.1 mg, 1.0 mol%), hydroxylamine sulfate (3.28 g, 20.0 mmol, 2.0 equiv.), cyclododecane (1.68 g, 10.0 mmol, 1.0 equiv.), AcOH (12.0 mL) and *t*BuOH (20.0 mL) were added to a reaction tube. The mixture was cooled down to 0 °C in a cryogenic bath, and then H<sub>2</sub>O<sub>2</sub> (5 equiv., 50 mmol, 5.67 mL, 30% wt. in H<sub>2</sub>O) in 20 mL of *t*BuOH was added dropwise with a syringe pump over 3 h under stirring at 0 °C without nitrogen protection. The reaction mixture was stirred for another 30 min, and then the mixture was quenched with Na<sub>2</sub>SO<sub>3</sub> solid. Next, the resulting mixture was evaporated to partially remove AcOH under reduced pressure, and DCM (20 mL) was added to the remaining mixture. The resulting mixture was basified with Na<sub>2</sub>CO<sub>3</sub> for about 30 minutes at room temperature. After completion, water (50.0 mL) was added, and the reaction solution was extracted with DCM (3 × 100.0 mL). The combined organic phase was dried over anhydrous Na<sub>2</sub>SO<sub>4</sub> and concentrated under reduced pressure to produce the crude product, which was purified through flash column chromatography (petroleum ether /EtOAc = 100:1 to 5:1) to give pure cyclododecanone oxime (1.63 g, 83% yield).

## 11. Oximation of propane to acetone oxime

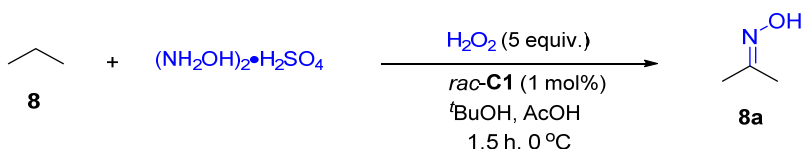

*Rac*-**C1** (10.1 mg, 1.0 mol%), hydroxylamine sulfate (164.2 mg, 1.0 mmol, 1.0 equiv.), AcOH (2.8 mL) were added to a reaction tube in *t*BuOH (2.0 mL), and the tube was capped with a rubber stopper and cooled down to 0 °C in an ice bath. Then, propane gas (flow rate 4 mL/min) was steadily flowed through the reaction solution via a syringe needle for 1 h. Meanwhile, H<sub>2</sub>O<sub>2</sub> (5.0

mmol, 5.0 equiv., 567 uL, 30% wt. in H<sub>2</sub>O) in 2 mL of <sup>t</sup>BuOH was added with a syringe pump over 1 h under stirring at 0 °C. The reaction mixture was stirred for another 30 min, and then quenched with Na<sub>2</sub>SO<sub>3</sub> solid. Next, 1,3,5-trimethoxybenzene (168.2 mg, 1 mmol) was added to the reaction tube and the resulting mixture was basified with Na<sub>2</sub>CO<sub>3</sub> for about 30 minutes at 0 °C in an ice bath. After completion, the reaction solution was filtered and then washed with DCM (10.0 mL). The reaction mixture was analyzed by GC (GC trace and calibration curve are shown below:  $Y = 2.6407 \cdot X - 0.0291$ ,  $R^2 = 0.9991$ ,  $X = A_{\text{acetoxime}} / A_{1,3,5\text{-Trimethoxybenzene}}$ ;  $Y = n_{\text{acetoxime}} / n_{1,3,5\text{-Trimethoxybenzene}}$ ; **8a**, 0.65 mmol, **65% yield**).

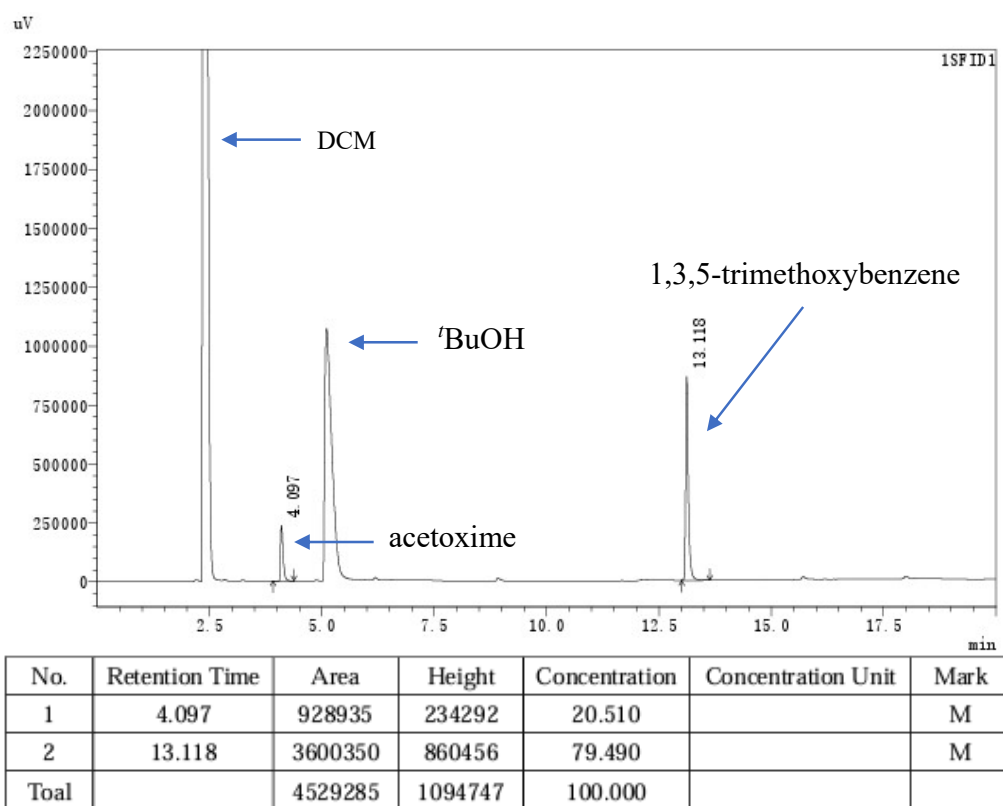

**Figure S-16.** GC trace of the mixture resulting from oxidative oximation of propane. GC parameters: injection temperature = 250 °C, column temperature = 90 °C, detector temperature = 250 °C. The carrier gas was N<sub>2</sub>.

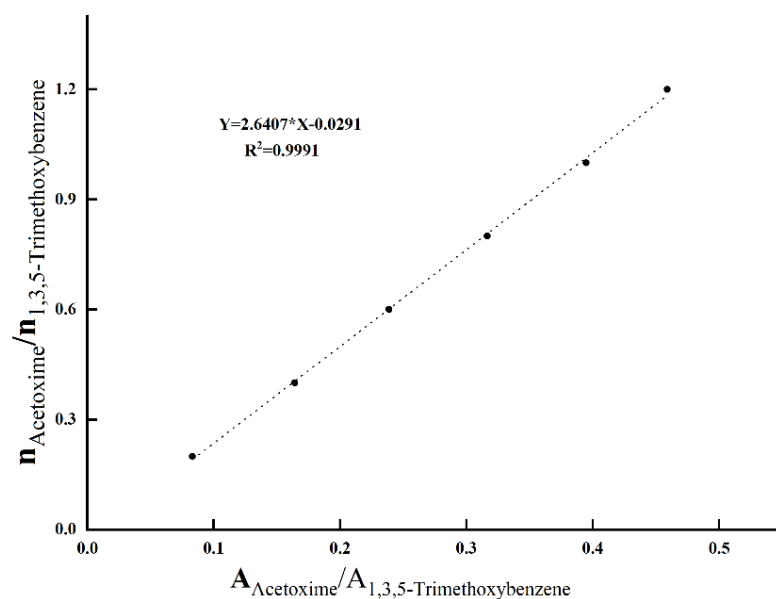

**Figure S-17.** GC calibration curve of acetoxime (commercial sample) and 1,3,5-trimethoxybenzene (GC calibration curve:  $Y = 2.6407 * X - 0.0291$ ,  $R^2 = 0.9991$ ,  $X = A_{\text{acetoxime}} / A_{1,3,5\text{-Trimethoxybenzene}}$ ;  $Y = n_{\text{acetoxime}} / n_{1,3,5\text{-Trimethoxybenzene}}$ ; A: area; n: number of moles).

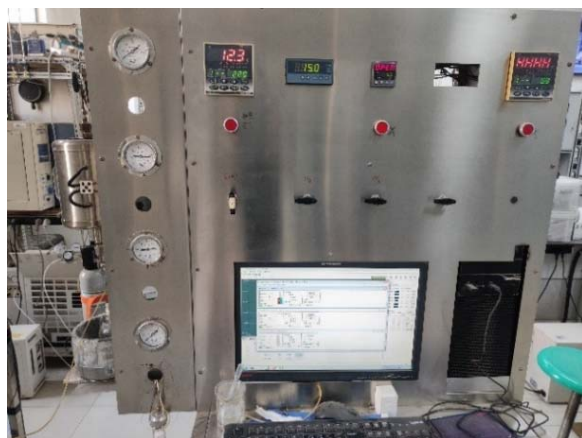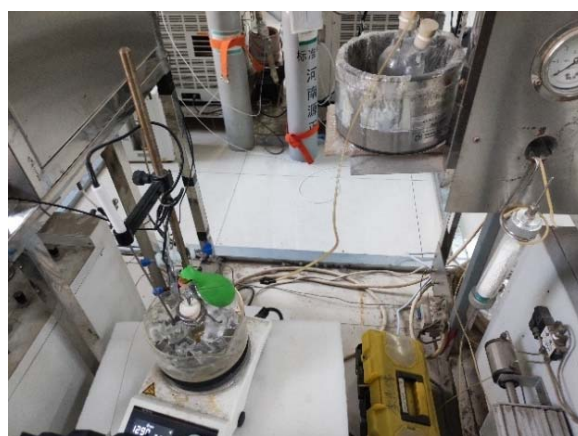

**Figure S-18.** The device used in oxidative oxidation of propane gas.

## 12. Analytical data of products

The analysis of products was aided by the literature, commercial products and/or samples prepared in this study (Section 8).

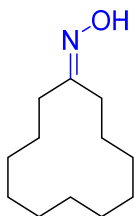

**Cyclododecanone oxime (1a)** <sup>107</sup> was synthesized by the general procedure **A** from cyclododecane (168.3 mg, 1 mmol) and purified by flash column chromatography on silica gel (gradient elution: Petroleum ether : EtOAc = 30:1 to 20:1 ) to afford the desired product cyclododecanone oxime as white solid (**179.6 mg, 91% yield**);

**<sup>1</sup>H NMR** (400 MHz, CDCl<sub>3</sub>)  $\delta$  (ppm): 8.22 (brs, 1H), 2.42 (t,  $J$  = 6.4 Hz, 2H), 2.26 (t,  $J$  = 6.4 Hz, 2H), 1.68–1.53 (m, 4H), 1.45–1.27 (m, 14H);

**<sup>13</sup>C NMR** (101 MHz, CDCl<sub>3</sub>)  $\delta$  (ppm): 160.7, 30.4, 26.3, 25.6, 25.2, 24.9, 24.1, 23.6, 23.4, 23.32, 23.26, 22.8;

**HRMS** (ESI)  $m/z$  [M+Na]<sup>+</sup> calculated for C<sub>12</sub>H<sub>23</sub>NNaO<sup>+</sup> 220.1672, found 220.1679.

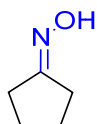

**Cyclopentanone oxime (2a)** <sup>108</sup> was synthesized by the general procedure **A** from hydroxylamine sulfate (164.2 mg, 1.0 mmol. 1.0 equiv.) and cyclopentane (351.0 mg, 5 mmol), and purified by flash column chromatography on silica gel (gradient elution: Petroleum ether : EtOAc = 30:1 to 20:1) to afford the desired product cyclopentanone oxime as white solid (**78.3 mg, 79% yield**);

**<sup>1</sup>H NMR** (400 MHz, CDCl<sub>3</sub>)  $\delta$  (ppm): 8.43 (brs, 1H), 2.46 (t,  $J$  = 6.8 Hz, 2H), 2.36 (t,  $J$  = 6.8 Hz, 2H), 1.84–1.67 (m, 4H);

**<sup>13</sup>C NMR** (101 MHz, CDCl<sub>3</sub>)  $\delta$  (ppm): 167.6, 31.0, 27.3, 25.3, 24.7;

**HRMS** (ESI)  $m/z$  [M+Na]<sup>+</sup> calculated for C<sub>5</sub>H<sub>9</sub>NNaO<sup>+</sup> 122.0576, found 122.0581.

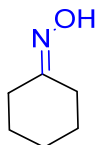

**Cyclohexanone oxime (3a)** <sup>107</sup> was synthesized by the general procedure **A** from cyclohexanone (84.2 mg, 1 mmol) and purified by flash column chromatography on silica gel (gradient elution: Petroleum ether : EtOAc = 30:1 to 20:1 ) to afford the desired product cyclohexanone oxime as white solid (**91.7 mg, 81% yield**);

**<sup>1</sup>H NMR** (400 MHz, CDCl<sub>3</sub>)  $\delta$  (ppm): 7.37 (brs, 1H), 2.50 (t,  $J$  = 6.0 Hz, 2H), 2.21 (t,  $J$  = 6.0 Hz, 2H), 1.71–1.58 (m, 6H);

**<sup>13</sup>C NMR** (101 MHz, CDCl<sub>3</sub>)  $\delta$  (ppm): 160.9, 32.3, 27.0, 25.9, 25.7, 24.6;

**HRMS** (ESI)  $m/z$  [M+H]<sup>+</sup> calculated for C<sub>6</sub>H<sub>12</sub>NO<sup>+</sup> 114.0913, found 114.0912.

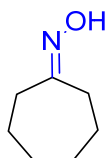

**Cycloheptanone oxime (4a)** <sup>109</sup> was synthesized by the general procedure **A** from cycloheptanone (98.2 mg, 1 mmol) and purified by flash column chromatography on silica gel (gradient elution: Petroleum ether : EtOAc = 30:1 to 20:1 ) to afford the desired product cycloheptanone oxime as white solid (**113.2 mg, 89% yield**);

**<sup>1</sup>H NMR** (400 MHz, CDCl<sub>3</sub>)  $\delta$  (ppm): 8.11 (brs, 1H), 2.58 (t,  $J$  = 6.0 Hz, 2H), 2.37 (t,  $J$  = 5.6 Hz, 2H), 1.70–1.51 (m, 8H);

**<sup>13</sup>C NMR** (101 MHz, CDCl<sub>3</sub>)  $\delta$  (ppm): 164.4, 33.8, 30.5, 30.4, 28.6, 27.6, 24.6;

**HRMS** (ESI)  $m/z$  [M+Na]<sup>+</sup> calculated for C<sub>7</sub>H<sub>13</sub>NNaO<sup>+</sup>: 150.0889, found 150.0885.

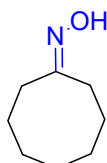

**Cyclooctanone oxime (5a)** <sup>109</sup> was synthesized by the general procedure **A** from cyclooctanone (112.2 mg, 1 mmol) and purified by flash column chromatography on silica gel (gradient elution: Petroleum ether : EtOAc = 30:1 to 20:1 ) to afford the desired product cyclooctanone oxime as white solid (**127.1 mg, 90% yield**);



**<sup>1</sup>H NMR** (400 MHz, CDCl<sub>3</sub>) δ (ppm): 8.93 (brs, 1H), 2.45 (t, *J* = 6.4 Hz, 2H), 2.29 (t, *J* = 6.4 Hz, 2H), 1.82–1.69 (m, 4H), 1.52–1.46 (m, 6H);

**<sup>13</sup>C NMR** (101 MHz, CDCl<sub>3</sub>) δ (ppm): 164.3, 33.3, 27.4, 26.9, 26.7, 25.6, 24.8, 24.6;

**HRMS** (ESI) *m/z* [M+Na]<sup>+</sup> calculated for C<sub>8</sub>H<sub>15</sub>NNaO<sup>+</sup>: 164.1046, found 164.1040.

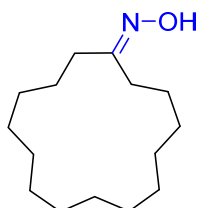

**Cyclopentadecanone oxime (6a)** was synthesized by the general procedure **A** from cyclopentadecane (210.4 mg, 1 mmol) and purified by flash column chromatography on silica gel (gradient elution: Petroleum ether : EtOAc = 30:1 to 20:1 ) to afford the desired product cyclopentadecanone oxime as white solid (**177.2 mg, 74% yield**);

**<sup>1</sup>H NMR** (400 MHz, CDCl<sub>3</sub>) δ (ppm): 8.09 (brs, 1H), 2.34 (t, *J* = 7.6 Hz, 2H), 2.19 (t, *J* = 7.6 Hz, 2H), 1.64–1.50 (m, 4H), 1.45–1.30 (m, 20H);

**<sup>13</sup>C NMR** (101 MHz, CDCl<sub>3</sub>) δ (ppm): 162.4, 34.5, 28.1, 27.6, 27.5, 26.8, 26.7, 26.53, 26.51, 26.44 (2C), 26.42, 25.3, 24.5;

**HRMS** (ESI) *m/z* [M+H]<sup>+</sup> calculated for C<sub>15</sub>H<sub>30</sub>NO<sup>+</sup>: 240.2322, found 240.2319.

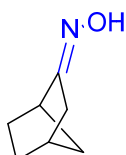

**(*E/Z*)-Bicyclo[2.2.1]heptan-2-one oxime (7a)**<sup>110</sup> was synthesized by the general procedure **A** from bicyclo[2.2.1]heptane (96.2 mg, 1 mmol) and purified by flash column chromatography on silica gel (gradient elution: Petroleum ether : EtOAc = 30:1 to 20:1 ) to afford the desired product (*E/Z*)-**7a** isomer mixture as white solid (**103.9 mg, 83% yield, *E/Z* = 7:1**);

*The E/Z isomers were confirmed by <sup>1</sup>H and <sup>13</sup>C NMR and the ratio of E/Z isomers was calculated by integration of <sup>1</sup>H and <sup>13</sup>C NMR spectra.*

**Major (*E*)-7a:** **<sup>1</sup>H NMR** (400 MHz, CDCl<sub>3</sub>) δ (ppm): 9.17 (brs, 1H), 2.85 (s, 1H), 2.49 (s, 1H), 2.28 (d, *J* = 17.6 Hz, 1H), 2.09 (d, *J* = 17.6 Hz, 1H), 1.75–1.58 (m, 2H), 1.52–1.42 (m, 2H),

1.40–1.34 (m, 1H), 1.34–1.24 (m, 1H);  $^{13}\text{C}$  NMR (101 MHz,  $\text{CDCl}_3$ )  $\delta$  (ppm): 167.9, 42.4, 39.1, 35.5, 34.9, 27.8, 27.1.

**Minor (Z)-7a:**  $^1\text{H}$  NMR (400 MHz,  $\text{CDCl}_3$ )  $\delta$  (ppm): 9.17 (brs, 1H), 3.50 (s, 1H), 2.49 (s, 1H), 2.22 (d,  $J = 15.2$  Hz, 1H), 1.97 (d,  $J = 15.2$  Hz, 1H), 1.75–1.58 (m, 2H), 1.52–1.42 (m, 2H), 1.40–1.34 (m, 1H), 1.34–1.24 (m, 1H);  $^{13}\text{C}$  NMR (101 MHz,  $\text{CDCl}_3$ )  $\delta$  (ppm): 167.0, 38.6, 38.4, 37.6, 37.3, 27.4, 26.0.

**HRMS** (ESI)  $m/z$   $[\text{M}+\text{Na}]^+$  calculated for  $\text{C}_7\text{H}_{11}\text{NNaO}^+$ : 148.0733, found 148.0738.

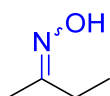

**(E/Z)-Butan-2-one oxime (9a)**<sup>108</sup> was synthesized according to the below procedure: **rac-C1** (10.1 mg, 1.0 mol%), hydroxylamine sulfate (164.2 mg, 1.0 mmol, 1.0 equiv.), and AcOH (2.8 mL) were added to a reaction tube containing  $t$ BuOH (2.0 mL), and the reaction tube was capped with a rubber stopper. Then, the solution was cooled down to 0 °C in an ice bath, and  $n$ -butane (gas, stored in a balloon) was introduced into the reaction solution by a syringe needle for 1 h. Meanwhile,  $\text{H}_2\text{O}_2$  (5.0 mmol, 5.0 equiv., 567  $\mu\text{L}$ , 30% wt. in  $\text{H}_2\text{O}$ ) in 2 mL of  $t$ BuOH was added dropwise with a syringe pump over 1 h under stirring at 0 °C. The reaction mixture was stirred for another 30 min, and then quenched with  $\text{Na}_2\text{SO}_3$  solid. Next, 1,3,5-trimethoxybenzene (168.2 mg, 1.0 mmol) was added to the reaction tube and the resulting mixture was basified with  $\text{Na}_2\text{CO}_3$  for about 30 minutes at 0 °C. After completion of the reaction, the solution was filtered and washed with DCM (2.0 mL). The reaction mixture was analyzed by GC (**75% yield**). Repeating the reaction again but without 1,3,5-trimethoxybenzene as an internal standard afforded, after extraction and removal of the solvent, a (E/Z)-**9a** isomer mixture as colorless oil (**40.1 mg, 46% yield, E/Z = 3:1**).

The E/Z isomers were confirmed by  $^1\text{H}$  and  $^{13}\text{C}$  NMR and the ratio of E/Z isomers was calculated by integration of  $^1\text{H}$  and  $^{13}\text{C}$  NMR spectra.

**Major (E)-9a:**  $^1\text{H}$  NMR (400 MHz,  $\text{CDCl}_3$ )  $\delta$  (ppm): 9.40 (brs, 1H), 2.20 (q,  $J = 7.6$  Hz, 2H), 1.87 (s, 3H), 1.06 (t,  $J = 7.6$  Hz, 3H);  $^{13}\text{C}$  NMR (101 MHz,  $\text{CDCl}_3$ )  $\delta$  (ppm): 159.5, 29.2, 13.4, 10.8.

**Minor (Z)-9a:**  $^1\text{H}$  NMR (400 MHz,  $\text{CDCl}_3$ )  $\delta$  (ppm): 9.40 (brs, 1H), 2.38 (q,  $J = 7.6$  Hz, 2H), 1.84 (s, 3H), 1.06 (t,  $J = 7.6$  Hz, 3H);  $^{13}\text{C}$  NMR (101 MHz,  $\text{CDCl}_3$ )  $\delta$  (ppm): 160.0, 22.0, 19.2, 9.9.

**GC-MS** ( $m/z$ ): calculated for  $\text{C}_4\text{H}_9\text{NO}$ : 87.1, found 87.1.

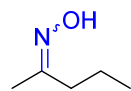

**(E/Z)-Pentan-2-one oxime (10a)**<sup>111</sup> was synthesized according to the below procedure: *rac*-**C1** (10.2 mg, 1.0 mol%), hydroxylamine sulfate (164.2 mg, 1.0 mmol, 1.0 equiv.), *n*-pentane (360.8 mg, 5 mmol), AcOH (2.8 mL) and *t*BuOH (2.0 mL) were added to a reaction tube. The mixture was then cooled down to 0 °C in a cryogenic bath, and then  $\text{H}_2\text{O}_2$  (5.0 mmol, 5.0 equiv., 567  $\mu\text{L}$ , 30% wt. in  $\text{H}_2\text{O}$ ) in 2 mL of *t*BuOH was added dropwise with a syringe pump over 1 h under stirring at 0 °C without nitrogen protection. The reaction mixture was stirred for another 30 min, and then the reaction mixture was quenched with  $\text{Na}_2\text{SO}_3$  solid. Next, 1,3,5-trimethoxybenzene (168.2 mg, 1.0 mmol) was added to the reaction tube and the resulting mixture was basified with  $\text{Na}_2\text{CO}_3$  for about 30 minutes at 0 °C in an ice bath. After completion of the reaction, the solution was filtered and washed with DCM (2.0 mL). The reaction mixture was analyzed by GC (**69% yield**). Repeating the reaction again but without 1,3,5-trimethoxybenzene as an internal standard afforded, after extraction and removal of the solvent, a (*E/Z*)-**10a** isomer mixture as colorless oil (**41.4 mg, 41% yield,  $E/Z = 3:1$** ).

The *E/Z* isomers were confirmed by  $^1\text{H}$  and  $^{13}\text{C}$  NMR and the ratio of *E/Z* isomers was calculated by integration of  $^1\text{H}$  and  $^{13}\text{C}$  NMR spectra.

**Major (E)-10a:**  $^1\text{H}$  NMR (400 MHz,  $\text{CDCl}_3$ )  $\delta$  (ppm): 8.51 (brs, 1H), 2.16 (t,  $J = 7.6$  Hz, 2H), 1.87 (s, 3H), 1.58–1.49 (m, 2H), 0.92 (t,  $J = 7.6$  Hz, 3H);  $^{13}\text{C}$  NMR (101 MHz,  $\text{CDCl}_3$ )  $\delta$  (ppm): 158.5, 37.8, 19.7, 13.7, 13.5;

**Minor (Z)-10a:**  $^1\text{H}$  NMR (400 MHz,  $\text{CDCl}_3$ )  $\delta$  (ppm): 8.51 (brs, 1H), 2.35 (t,  $J = 8.0$  Hz, 2H), 1.86 (s, 3H), 1.58–1.49 (m, 2H), 0.95 (t,  $J = 7.6$  Hz, 3H);  $^{13}\text{C}$  NMR (101 MHz,  $\text{CDCl}_3$ )  $\delta$  (ppm): 158.9, 30.7, 19.9, 19.0, 14.3.

**GC-MS** ( $m/z$ ): calculated for  $\text{C}_5\text{H}_{11}\text{NO}$ : 101.1, found 101.1.

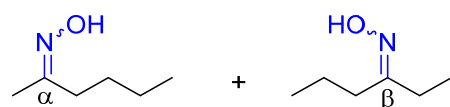

**(*E/Z*)-Hexan-2-one oxime (11a- $\alpha$ -oxime)** and **(*E/Z*)-hexan-3-one oxime (11a- $\beta$ -oxime)**<sup>112</sup> was synthesized from *n*-hexane (430.9 mg, 5 mmol) and hydroxylamine sulfate (164.2 mg, 1.0 mmol, 1.0 equiv.), following a similar procedure to the synthesis of (*E/Z*)-10a. The product of **11a** was obtained as a mixture of two regioisomers with **58% GC yield**. Repeating the reaction again but without 1,3,5-trimethoxybenzene as an internal standard afforded, after extraction and removal of the solvent to afford a mixture of two regioisomers (*E/Z*)-11a- $\alpha$ -oxime and (*E/Z*)-11a- $\beta$ -oxime as colorless oil (**53.0 mg, 46% yield,  $\beta$ : $\alpha$  = 1:2.5,  $\alpha$  *E/Z* = 3:1;  $\beta$  *E/Z* = 1:1**). The regioisomer (*E/Z*)-11a- $\alpha$ -oxime was isolated from the mixture in 30% yield (35 mg).

*Site of oximation was assigned based on analysis of the <sup>1</sup>H and <sup>13</sup>C NMR spectra of the mixture products with the isolated (*E/Z*)-11a- $\alpha$ -oxime. The *E/Z* isomers were confirmed by <sup>1</sup>H and <sup>13</sup>C NMR and the ratio of *E/Z* isomers was calculated by integration of <sup>1</sup>H and <sup>13</sup>C NMR spectra.*

**<sup>1</sup>H NMR** (400 MHz, CDCl<sub>3</sub>)  $\delta$  (ppm): 9.56 (brs, 0.92H), 2.38–2.28 (m, 1.34H), 2.23–2.12 (m, 2.17 H), 1.85 (s, 1.99H), 1.84 (s, 0.66H), 1.56–1.42 (m, 2.88H), 1.36–1.22 (m, 3.03H), 1.06 (t, *J* = 7.2 Hz, 1.17 H), 0.95–0.86 (m, 4.55H);

**<sup>13</sup>C NMR** (101 MHz, CDCl<sub>3</sub>)  $\delta$  (ppm): 162.7, 162.6, 159.0, 158.6, 35.8, 35.5, 29.6, 28.49, 28.46, 27.7, 27.5, 22.9, 22.3, 20.9, 19.8, 19.7, 19.2, 14.4, 13.9, 13.8, 13.4, 10.9, 10.1;

**HRMS** (ESI<sup>+</sup>): *m/z* [M+H]<sup>+</sup> calculated for C<sub>6</sub>H<sub>15</sub>NO<sup>+</sup>: 116.1070, found 116.1071.

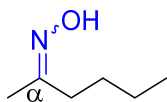

**(*E/Z*)-Hexan-2-one oxime (11a- $\alpha$ -oxime) isomer mixtures (*E/Z* = 3:1):**

**Major (*E*)-11a- $\alpha$ -oxime:** **<sup>1</sup>H NMR** (400 MHz, CDCl<sub>3</sub>)  $\delta$  (ppm): 8.79 (brs, 1H), 2.18 (t, *J* = 8.0 Hz, 2H), 1.87 (s, 3H), 1.53–1.43 (m, 2H), 1.39–1.27 (m, 2H), 0.91 (t, *J* = 7.2 Hz, 3H); **<sup>13</sup>C NMR** (101 MHz, CDCl<sub>3</sub>)  $\delta$  (ppm): 158.7, 35.5, 28.5, 22.3, 13.8, 13.4.

**Minor (*Z*)-11a- $\alpha$ -oxime:** **<sup>1</sup>H NMR** (400 MHz, CDCl<sub>3</sub>)  $\delta$  (ppm): 8.79 (brs, 1H), 2.37 (t, *J* = 8.0 Hz, 2H), 1.86 (s, 3H), 1.53–1.43 (m, 2H), 1.39–1.27 (m, 2H), 0.92 (t, *J* = 7.2 Hz, 3H); **<sup>13</sup>C NMR** (101 MHz, CDCl<sub>3</sub>)  $\delta$  (ppm): 159.1, 28.5, 27.7, 22.9, 19.8, 13.9.

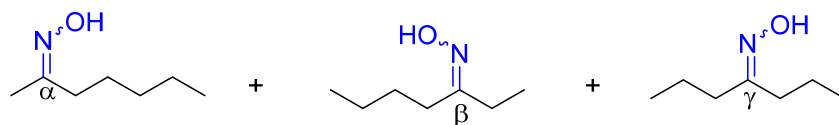

**(*E/Z*)-Heptan-2-one oxime (12a- $\alpha$ -oxime), (*E/Z*)-heptan-3-one oxime (12a- $\beta$ -oxime) and heptan-4-one oxime (12a- $\gamma$ -oxime) (12a)**<sup>112</sup> were synthesized from *n*-heptane (501.0 mg, 5 mmol) and hydroxylamine sulfate (164.2 mg, 1.0 mmol, 1.0 equiv.), following a similar procedure to the synthesis of (*E/Z*)-10a. The product **12a** was obtained as a mixture of three regioisomers with **50% GC yield**. Repeating the reaction again but without 1,3,5-trimethoxybenzene as an internal standard afforded, after extraction and removal of the solvent to afford a mixture of three regioisomers (*E/Z*)-12a- $\alpha$ -oxime, (*E/Z*)-12a- $\beta$ -oxime and 12a- $\gamma$ -oxime as colorless oil (**55.6 mg, 43% yield,  $\gamma$ : $\beta$ : $\alpha$  = 1:3.3:8.3,  $\alpha$ , *E/Z* = 3:1;  $\beta$ , *E/Z* = 1:1**), and the obtained product needs no further purification and was taken directly for NMR and HRMS analysis.

*Site of oximation was assigned based on analysis of the <sup>1</sup>H and <sup>13</sup>C NMR of the mixture products with the synthesized (*E/Z*)-12a- $\alpha$ -oxime. The *E/Z* isomers were confirmed by <sup>1</sup>H and <sup>13</sup>C NMR and the ratio of *E/Z* isomers was calculated by integration of <sup>1</sup>H and <sup>13</sup>C NMR spectra.*

**<sup>1</sup>H NMR** (400 MHz, CDCl<sub>3</sub>)  $\delta$  (ppm): 2.38–2.28 (m, 1.67H), 2.23–2.12 (m, 2.57H), 1.86 (s, 2.10H), 1.84 (s, 0.71H), 1.55–1.42 (m, 3.71H), 1.37–1.22 (m, 6.29H), 1.07 (t, *J* = 7.6 Hz, 1.24H), 0.96–0.85 (m, 6.05H);

**<sup>13</sup>C NMR** (101 MHz, CDCl<sub>3</sub>)  $\delta$  (ppm): 162.9, 162.8, 161.7, 159.0, 158.7, 36.2, 35.8, 33.5, 32.0, 31.4, 29.6, 28.7, 28.5, 27.9, 27.5, 27.4, 26.1, 25.2, 23.1, 22.51, 22.47, 20.9, 19.9, 19.7, 19.2, 14.0, 13.92, 13.89, 13.87, 13.4, 10.9, 10.2;

**HRMS** (ESI<sup>+</sup>): *m/z* [M+Na]<sup>+</sup> calculated for C<sub>7</sub>H<sub>15</sub>NNaO<sup>+</sup>: 152.1046, found 152.1042.

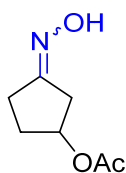

**(*E/Z*)-3-(Hydroxyimino)cyclopentyl acetate (13a)**<sup>113</sup> was synthesized by the general procedure **A** from cyclopentyl acetate (128.2 mg, 1 mmol) and purified by flash column chromatography on silica gel (gradient elution: Petroleum ether : EtOAc = 20:1 to 10:1 ) to afford (*E/Z*)-13a isomer mixture as white solid (**117.9 mg, 75% yield**);

The *E/Z* isomers were confirmed by  $^1\text{H}$  and  $^{13}\text{C}$  NMR and the ratio of *E/Z* isomers (*E/Z* = 1.6:1) was calculated by integration of  $^1\text{H}$  and  $^{13}\text{C}$  NMR spectra.

$^1\text{H}$  NMR (400 MHz,  $\text{CDCl}_3$ )  $\delta$  (ppm): 8.07 (brs, 1H), 5.33–5.23 (m, 1H), 2.82–2.40 (m, 4H), 2.05–1.95 (m, 5H);

$^{13}\text{C}$  NMR of major (*E*)-13a: (101 MHz,  $\text{CDCl}_3$ )  $\delta$  (ppm): 170.8, 164.0, 74.0, 37.2, 30.5, 24.8, 21.3;  $^{13}\text{C}$  NMR of minor (*Z*)-13a: (101MHz,  $\text{CDCl}_3$ )  $\delta$  (ppm): 170.8, 163.7, 74.0, 34.2, 31.0, 28.0, 21.3;

HRMS (ESI)  $m/z$   $[\text{M}+\text{Na}]^+$  calculated for  $\text{C}_7\text{H}_{11}\text{NNaO}_3^+$ : 180.0631, found 180.0639.

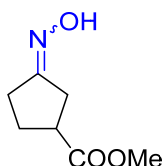

**Methyl (*E/Z*)-3-(hydroxyimino)cyclopentane-1-carboxylate (14a)** was synthesized by the general procedure A from methyl cyclopentanecarboxylate (128.2 mg, 1 mmol) and purified by flash column chromatography on silica gel (gradient elution: Petroleum ether : EtOAc = 30:1 to 10:1 ) to afford (*E/Z*)-14a isomer mixture as colorless oil (127.3 mg, 81% yield, *E/Z* =1:1); *E/Z* isomers were confirmed by  $^1\text{H}$  and  $^{13}\text{C}$  NMR and the ratio of *E/Z* isomers was calculated by integration of  $^1\text{H}$  and  $^{13}\text{C}$  NMR spectra.

$^1\text{H}$  NMR (400 MHz,  $\text{CDCl}_3$ )  $\delta$  (ppm): 9.58 (brs, 1H), 3.63 (s, 3H), 2.93–2.25 (m, 5H), 2.11–1.98 (m, 1H), 1.95–1.81 (m, 1H);

$^{13}\text{C}$  NMR (101 MHz,  $\text{CDCl}_3$ )  $\delta$  (ppm): 175.0, 174.8, 164.5, 164.3, 51.9, 42.5, 42.2, 33.8, 30.5, 29.8, 28.5, 28.0, 26.5;

HRMS (ESI)  $m/z$   $[\text{M}+\text{Na}]^+$  calculated for  $\text{C}_7\text{H}_{11}\text{NNaO}_3^+$ : 180.0631, found 180.0634.

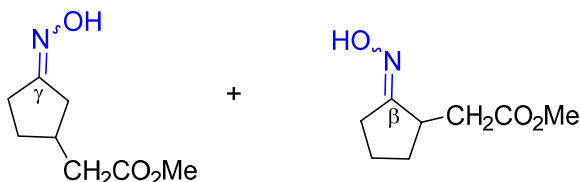

**Methyl (*E/Z*)-2-(3-(hydroxyimino)cyclopentyl)acetate (15a- $\gamma$ -oxime) and methyl (*E/Z*)-2-(2-(hydroxyimino)cyclopentyl)acetate(15a- $\beta$ -oxime) (15a)** was synthesized by the general

procedure **A** from methyl 2-cyclopentylacetate (142.2 mg, 1 mmol) and purified by flash column chromatography on silica gel (gradient elution: Petroleum ether : EtOAc = 30:1 to 10:1 ) to afford a mixture of two regioisomers (*E/Z*)-**15a-γ-oxime** and (*E/Z*)-**15a-β-oxime** as colorless oil (**142.0 mg, 83% yield, β:γ = 1:4, γ, *E/Z* = 1:1, β, *E/Z* = 3:1**). The regioisomer (*E/Z*)-**15a-γ-oxime** was isolated from the mixture in 64% yield (110 mg).

*Site of oximation was assigned based on analysis of the <sup>1</sup>H and <sup>13</sup>C NMR spectra of the mixture products with the isolated (*E/Z*)-**15a-γ-oxime**. The *E/Z* isomers were confirmed by <sup>1</sup>H and <sup>13</sup>C NMR and the ratio of *E/Z* isomers was calculated by integration of <sup>1</sup>H and <sup>13</sup>C NMR spectra.*

**<sup>1</sup>H NMR** (400 MHz, CDCl<sub>3</sub>) δ (ppm): 9.00 (brs, 0.7H), 3.66 (s, 3H), 2.96–2.50 (m, 1.70H), 2.49–2.28 (m, 3.62H), 2.11–1.92(m, 1.78H), 1.92–1.49 (m, 0.92H), 1.44–1.17 (m, 1.33H);

**<sup>13</sup>C NMR** (101 MHz, CDCl<sub>3</sub>) δ (ppm): 173.0(2C), 172.98, 172.96, 167.4(2C), 165.8, 165.6, 51.7, 39.7, 39.4, 39.0, 37.0, 36.5, 35.3, 34.9, 33.5, 32.1, 31.2, 31.1, 30.5, 30.2, 27.2, 26.6, 22.5;

**HRMS** (ESI) *m/z* [M+Na]<sup>+</sup> calculated for C<sub>8</sub>H<sub>13</sub>NNaO<sub>3</sub><sup>+</sup>: 194.0788, found 194.0788.

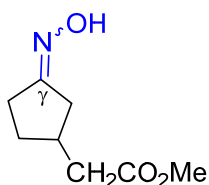

**Methyl (*E/Z*)-2-(3-(hydroxyimino)cyclopentyl)acetate (**15a-γ-oxime**) isomer mixtures (*E/Z* = 1:1): **<sup>1</sup>H NMR** (400 MHz, CDCl<sub>3</sub>) δ (ppm): 9.40 (brs, 1H), 3.64 (s, 3H), 2.80 (dd, *J* = 18.4, 7.2 Hz, 0.55H), 2.65–2.56 (m, 1.2H), 2.47–2.30 (m, 4.25H), 2.06–1.97(m, 2H), 1.43–1.31(m, 1H); **<sup>13</sup>C NMR** (101 MHz, CDCl<sub>3</sub>) δ (ppm): 173.00, 172.99, 165.7, 165.6, 51.7, 39.3, 38.9, 36.9, 35.2, 34.8, 33.5, 31.1, 30.5, 30.1, 26.7.**

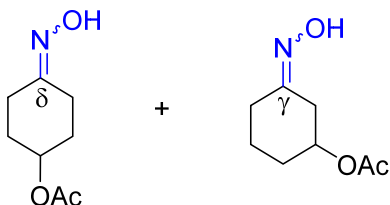

**4-(Hydroxyimino)cyclohexyl acetate (**16a-δ-oxime**) and (*E/Z*)-3-(hydroxyimino)cyclohexyl acetate (**16a-γ-oxime**) (**16a**)** was synthesized by the general procedure **A** from cyclohexyl acetate (142.2 mg, 1 mmol) and purified by flash column chromatography on silica gel (gradient

elution: Petroleum ether : EtOAc = 30:1 to 10:1 ) to afford a mixture of two regioisomers **16a- $\delta$ -oxime** and (*E/Z*)-**16a- $\gamma$ -oxime** as white solid (**138.7 mg, 81% yield,  $\gamma$ : $\delta$  = 1.5:1,  $\gamma$ , *E/Z* = 1:1**).

*Site of oximation was assigned based on analysis of the  $^1\text{H}$  and  $^{13}\text{C}$  NMR spectra of the mixture products with the synthesized 16a- $\delta$ -oxime. The *E/Z* isomers were confirmed by  $^1\text{H}$  and  $^{13}\text{C}$  NMR and the ratio of *E/Z* isomers was calculated by integration of  $^1\text{H}$  and  $^{13}\text{C}$  NMR spectra.*

**$^1\text{H}$  NMR** (400 MHz,  $\text{CDCl}_3$ )  $\delta$  (ppm): 9.13 (brs, 1H), 5.01–4.93 (m, 1H), 2.90–2.71 (m, 1H), 2.63–2.38 (m, 2H), 2.55–2.17 (m, 1H), 2.07–2.00 (m, 3H), 1.94–1.50 (m, 4H);

**$^{13}\text{C}$  NMR** (101 MHz,  $\text{CDCl}_3$ )  $\delta$  (ppm): 170.7, 170.5(2C), 158.4, 157.4, 156.9, 71.1, 70.5, 70.4, 36.9, 31.1, 30.8, 30.5, 30.4, 29.7, 29.5, 28.1, 23.7, 21.8, 21.4, 21.3, 20.7, 20.5;

**HRMS** (ESI)  $m/z$   $[\text{M}+\text{Na}]^+$  calculated for  $\text{C}_8\text{H}_{13}\text{NNaO}_3^+$ : 194.0788, found 194.0792.

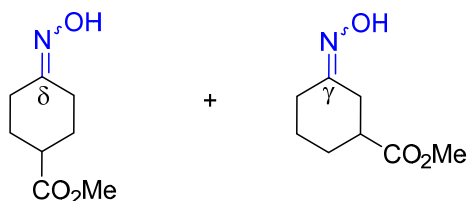

**Methyl 4-(hydroxyimino)cyclohexane-1-carboxylate (17a- $\delta$ -oxime) and methyl (*E/Z*)-3-(hydroxyimino)cyclohexane-1-carboxylate (17a- $\gamma$ -oxime) (17a)** was synthesized by the general procedure **A** from methyl cyclohexanecarboxylate (142.2 mg, 1 mmol) and purified by flash column chromatography on silica gel (gradient elution: Petroleum ether : EtOAc = 20:1 to 5:1 ) to afford a mixture of two regioisomers **17a- $\delta$ -oxime** and (*E/Z*)-**17a- $\gamma$ -oxime** as colorless oil (**147.2 mg, 86% yield,  $\gamma$ : $\delta$  = 2.7:1,  $\gamma$ , *E/Z* = 1:1**).

*Site of oximation was assigned based on analysis of the  $^1\text{H}$  and  $^{13}\text{C}$  NMR spectra of the mixture products with the synthesized 17a- $\delta$ -oxime. The *E/Z* isomers were confirmed by  $^1\text{H}$  and  $^{13}\text{C}$  NMR and the ratio of *E/Z* isomers was calculated by integration of  $^1\text{H}$  and  $^{13}\text{C}$  NMR spectra.*

**$^1\text{H}$  NMR** (400 MHz,  $\text{CDCl}_3$ )  $\delta$  (ppm): 9.57 (brs, 1H), 3.65–3.62 (m, 3H), 3.37 (d,  $J$  = 14.4 Hz, 0.36H,  $\gamma$ -**17a**), 3.16–3.06 (m, 0.64H, ( $\gamma$ + $\delta$ )-**17a**), 2.58–2.20 (m, 2H), 2.16–1.30 (m, 6H);

**$^{13}\text{C}$  NMR** (101 MHz,  $\text{CDCl}_3$ )  $\delta$  (ppm) 175.2, 175.0, 174.9, 158.7, 158.4, 158.0, 51.9, 51.8, 43.1, 41.9, 41.8, 33.8, 31.2, 30.3, 28.7, 28.6, 28.5 27.4, 26.3, 25.1, 24.0, 23.8, 22.8;

**HRMS** (ESI)  $m/z$   $[\text{M}+\text{Na}]^+$  calculated for  $\text{C}_8\text{H}_{13}\text{NNaO}_3^+$ : 194.0788, found 194.0790.



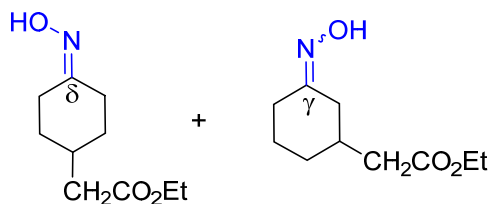

**Ethyl 2-(4-(hydroxyimino)cyclohexyl)acetate (18a- $\delta$ -oxime) and ethyl (*E/Z*)-2-(3-(hydroxyimino) cyclohexyl)acetate (18a- $\gamma$ -oxime) (18a)** was synthesized by the general procedure A from ethyl 2-cyclohexylacetate (170.3 mg, 1 mmol) and purified by flash column chromatography on silica gel (gradient elution: Petroleum ether : EtOAc = 20:1 to 5:1 ) to afford a mixture of two regioisomers **18a- $\delta$ -oxime** and (*E/Z*)-**18a- $\gamma$ -oxime** as colorless oil (**173.3 mg, 87% yield,  $\gamma$ : $\delta$  = 2.5:1,  $\gamma$ , *E/Z* = 1:1**).

Site of oximation was assigned based on analysis of the  $^1\text{H}$  and  $^{13}\text{C}$  NMR spectra of the mixture products with the synthesized **18a- $\delta$ -oxime**. The *E/Z* isomers were confirmed by  $^1\text{H}$  and  $^{13}\text{C}$  NMR and the ratio of *E/Z* isomers was calculated by integration of  $^1\text{H}$  and  $^{13}\text{C}$  NMR spectra.

**$^1\text{H}$  NMR** (400 MHz,  $\text{CDCl}_3$ )  $\delta$  (ppm): 9.23 (brs, 1H), 4.13–4.00 (m, 2H), 3.26–3.05 (m, 1H), 2.44–2.16 (m, 3H), 2.16–1.94 (m, 2H), 1.91–1.73 (m, 3H), 1.65–1.37 (m, 1H), 1.24–1.70 (m, 4H);  
 **$^{13}\text{C}$  NMR** (101 MHz,  $\text{CDCl}_3$ )  $\delta$  (ppm): 172.7, 172.32, 172.30, 159.6, 159.3, 159.1, 60.4, 41.1, 40.94, 40.85, 37.8, 35.1, 33.99, 33.95, 32.6, 31.7, 31.5, 31.3, 31.1, 30.2, 25.3, 24.0, 23.9, 14.27, 14.25;

**HRMS** (ESI)  $m/z$   $[\text{M}+\text{Na}]^+$  calculated for  $\text{C}_{10}\text{H}_{17}\text{NNaO}_3^+$ : 222.1101, found 222.1103.

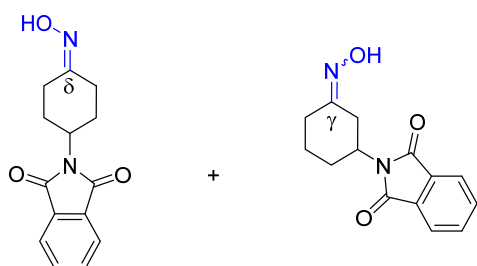

**2-(4-(Hydroxyimino)cyclohexyl)isoindoline-1,3-dione (19a- $\delta$ -oxime) and (*E/Z*)-2-(3-(hydroxyimino) cyclohexyl)isoindoline-1,3-dione (19a- $\gamma$ -oxime) (19a)** was synthesized by the general procedure A from 2-cyclohexylisoindoline-1,3-dione (229.3 mg, 1 mmol) and purified by flash column chromatography on silica gel (gradient elution: Petroleum ether : EtOAc = 10:1 to 3:1 ) to afford a mixture of two regioisomers **19a- $\delta$ -oxime** and (*E/Z*)-**19a- $\gamma$ -oxime** as white solid

(111.1 mg, 43% yield,  $\gamma:\delta = 2.5:1$ ,  $\gamma$ ,  $E/Z = 1:1$ ), and remaining starting material (102.3 mg, 45% remaining);

Site of oximation was assigned based on analysis of the  $^{13}\text{C}$  NMR spectra of the mixture products. The  $E/Z$  isomers were confirmed by  $^{13}\text{C}$  NMR and the ratio of  $E/Z$  isomers was calculated by integration of  $^1\text{H}$  and  $^{13}\text{C}$  NMR spectra.

$^1\text{H}$  NMR (400 MHz,  $\text{CDCl}_3$ )  $\delta$  (ppm): 9.05 (brs, 1H), 7.85–7.77 (m, 2H), 7.72–7.65 (m, 2H), 4.42–4.16 (m, 1H), 3.52–3.43 [m, 0.7H, ( $\gamma+\delta$ )-**19a**], 3.38 (d,  $J = 14.4$  Hz, 0.25H,  $\gamma$ -**19a**), 3.09 (t,  $J = 12.8$  Hz, 0.25H,  $\gamma$ -**19a**), 2.73 (t,  $J = 12.8$  Hz, 0.25H,  $\gamma$ -**19a**), 2.60–2.32 (m, 2.39 H, ( $\gamma+\delta$ )-**19a**), 2.29–2.10 (m, 0.86H, ( $\gamma+\delta$ )-**19a**), 2.04–1.70 [m, 2.94H, ( $\gamma+\delta$ )-**19a**], 1.58–1.40 (m, 0.64H, ( $\gamma+\delta$ )-**19a**);

$^{13}\text{C}$  NMR (101 MHz,  $\text{CDCl}_3$ )  $\delta$  (ppm): 168.3( $\delta$ -**19a**), 168.24( $\gamma$ -**19a**), 168.22( $\gamma$ -**19a**), 158.3 ( $\delta$ -**19a**), 157.74( $\gamma$ -**19a**), 157.67( $\gamma$ -**19a**), 134.11, 134.07, 132.0, 131.9, 123.34, 123.31, 123.2, 49.9, 49.6, 48.8, 35.1, 30.9, 30.8, 29.4, 29.3, 29.2, 27.9, 27.7, 24.3, 23.4, 23.2, 23.1; HRMS (ESI<sup>+</sup>):  $m/z$  [ $\text{M}+\text{Na}$ ]<sup>+</sup> calculated for  $\text{C}_{14}\text{H}_{14}\text{N}_2\text{NaO}_3^+$ : 281.0897, found 281.0892.

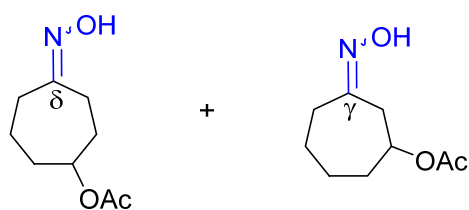

( $E/Z$ )-4-(hydroxyimino)cycloheptyl acetate (**20a- $\delta$ -oxime**) and ( $E/Z$ )-3-(hydroxyimino)cycloheptyl acetate (**20a- $\gamma$ -oxime**) (**20a**) was synthesized by the general procedure A from cycloheptyl acetate (156.2 mg, 1 mmol) and purified by flash column chromatography on silica gel (gradient elution: Petroleum ether : EtOAc = 30:1 to 10:1 ) to afford a mixture of two regioisomers ( $E/Z$ )-**20a- $\delta$ -oxime** and ( $E/Z$ )-**20a- $\gamma$ -oxime** as colorless oil (148.2 mg, 80% yield,  $\gamma:\delta = 1:2$ ,  $\delta$ ,  $E/Z = 1:1$ ;  $\gamma$ ,  $E/Z = 1:1$ ).

Site of oximation was assigned based on analysis of the  $^{13}\text{C}$  NMR spectra of the mixture products. The  $E/Z$  isomers were confirmed by  $^{13}\text{C}$  NMR and the ratio of  $E/Z$  isomers was calculated by integration of  $^{13}\text{C}$  NMR spectrum.

$^1\text{H}$  NMR (400 MHz,  $\text{CDCl}_3$ )  $\delta$  (ppm): 9.08 (brs, 1H), 5.10–4.78 (m, 1H), 2.90–2.24 (m, 4H), 2.04–1.98 (m, 3H), 1.95–1.46 (m, 6H);

$^{13}\text{C}$  NMR (101 MHz,  $\text{CDCl}_3$ )  $\delta$  (ppm): 170.5( $\delta$ -**20a**), 170.44( $\delta$ -**20a**), 170.38( $\gamma$ -**20a**), 170.3( $\gamma$ -**20a**), 163.0( $\delta$ -**20a**), 162.5( $\delta$ -**20a**), 159.2( $\gamma$ -**20a**), 158.9( $\gamma$ -**20a**), 74.4, 73.7, 71.7, 71.2, 38.4, 35.7, 35.0, 34.8, 34.7, 33.9, 33.7, 33.1, 32.3, 29.5, 28.5, 28.3, 27.7, 27.0, 25.3, 24.4, 23.9, 22.7, 21.8, 21.44, 21.39, 21.3, 18.8;

HRMS (ESI)  $m/z$   $[\text{M}+\text{Na}]^+$  calculated for  $\text{C}_9\text{H}_{15}\text{NNaO}_3^+$ : 208.0944, found 208.0951.

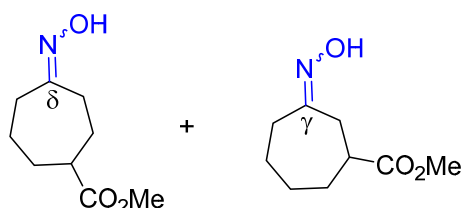

Methyl (*E/Z*)-4-(hydroxyimino)cycloheptane-1-carboxylate (**21a- $\delta$ -oxime**) and methyl (*E/Z*)-3-(hydroxyimino)cycloheptane-1-carboxylate (**21a- $\gamma$ -oxime**) (**21a**) was synthesized by the general procedure A from methyl cycloheptanecarboxylate (156.2 mg, 1 mmol) and purified by flash column chromatography on silica gel (gradient elution: Petroleum ether : EtOAc = 20:1 to 5:1 ) to afford a mixture of two regioisomers (*E/Z*)-**21a- $\delta$ -oxime** and (*E/Z*)-**21a- $\gamma$ -oxime** as colorless oil (155.6 mg, 84% yield,  $\gamma$ : $\delta$  = 1:1.3,  $\delta$  *E/Z* = 1:1;  $\gamma$  *E/Z* = 1:1).

Site of oximation was assigned based on the analysis of the  $^{13}\text{C}$  NMR spectrum of the mixture products. The *E/Z* isomers were confirmed by  $^{13}\text{C}$  NMR and the ratio of *E/Z* isomers was calculated by integration of  $^{13}\text{C}$  NMR spectrum.

$^1\text{H}$  NMR (400 MHz,  $\text{CDCl}_3$ )  $\delta$  (ppm): 9.51 (brs, 0.78H), 3.65–3.61 (m, 3H), 2.97 (d,  $J$  = 15.6 Hz, 0.30H), 2.78–2.40 (m, 4.09H), 2.35–2.20 (m, 1.16H), 2.05–1.33 (m, 6.31H);

$^{13}\text{C}$  NMR (101 MHz,  $\text{CDCl}_3$ )  $\delta$  (ppm): 176.2( $\delta$ -**21a**), 176.0(( $\delta$ + $\gamma$ )-**21a**), 175.7( $\gamma$ -**21a**), 163.0( $\delta$ -**21a**), 162.8( $\delta$ -**21a**), 161.4( $\gamma$ -**21a**), 160.9( $\gamma$ -**21a**), 51.9( $\gamma$ -**21a**), 51.8( $\gamma$ -**21a**), 51.73( $\delta$ -**21a**), 51.71( $\delta$ -**21a**), 46.6, 46.4, 44.1, 41.5, 35.6, 33.5, 33.12, 33.09, 33.0, 32.6, 32.5, 31.5, 30.6, 29.6, 28.3, 28.24, 28.19, 28.0, 26.9, 26.8, 26.6, 25.6, 23.9, 22.6; HRMS (ESI)  $m/z$   $[\text{M}+\text{Na}]^+$  calculated for  $\text{C}_9\text{H}_{15}\text{NNaO}_3^+$ : 208.0944, found 208.0949.

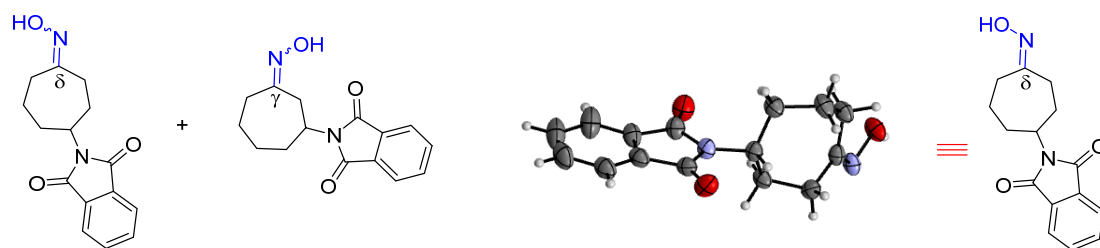

**(*E/Z*)-2-(4-(hydroxyimino)cycloheptyl)isoindoline-1,3-dione (22a- $\delta$ -oxime) and (*E/Z*)-2-(3-(hydroxyimino)cycloheptyl)isoindoline-1,3-dione (22a- $\gamma$ -oxime) (22a)** was synthesized by the general procedure A from 2-cycloheptylisoindoline-1,3-dione (243.3 mg, 1 mmol) and purified by flash column chromatography on silica gel (gradient elution: Petroleum ether : EtOAc = 10:1 to 1:1 ) to afford two separated regioisomers (*E/Z*)-22a- $\delta$ -oxime (114.4 mg, 42% yield, *E/Z* = 1:1) and (*E/Z*)-22a- $\gamma$ -oxime (49.0 mg, 18% yield, *E/Z* = 1:1) as white solid ( $\gamma$ : $\delta$  = 1:2.3), with remaining starting material <5%.

The *E/Z* isomers were confirmed by  $^1\text{H}$  and  $^{13}\text{C}$  NMR and the X-ray structure of the *E* isomer, and the ratio of *E/Z* isomers was determined by integration of  $^1\text{H}$  and  $^{13}\text{C}$  NMR spectra.

**(*E/Z*)-22a- $\delta$ -oxime:**

$^1\text{H}$  NMR (400 MHz,  $\text{CDCl}_3$ )  $\delta$  (ppm): 9.39 (brs, 1H), 7.79–7.75 (m, 2H), 7.68–7.64 (m, 2H), 4.24–4.16 (m, 0.5H), 4.11–4.03 (m, 0.5H), 2.90–2.75 (m, 1H), 2.63–2.15 (m, 5H), 2.05–1.78 (m, 3H), 1.67–1.38 (m, 1H);  $^{13}\text{C}$  NMR (101 MHz,  $\text{CDCl}_3$ )  $\delta$  (ppm): 168.1, 168.0, 162.7, 162.5, 133.9 (2C), 132.0, 131.9, 123.2 (2C), 53.7 (2C), 34.0, 33.7, 32.9, 31.1, 30.7, 29.4, 28.2, 25.9, 24.9, 22.0; HRMS (ESI+):  $m/z$   $[\text{M}+\text{Na}]^+$  calculated for  $\text{C}_{15}\text{H}_{16}\text{N}_2\text{NaO}_3^+$ : 295.1053, found 295.1053.

**(*E/Z*)-22a- $\gamma$ -oxime:**

$^1\text{H}$  NMR (400 MHz,  $\text{CDCl}_3$ )  $\delta$  (ppm): 8.80 (brs, 1H), 7.83–7.77 (m, 2H), 7.71–7.65 (m, 2H), 4.49–4.39 (m, 0.5H), 4.26–4.17 (m, 0.5H), 3.42–3.30 (m, 1H), 2.90–2.63 (m, 1H), 2.61–2.20 (m, 3H), 2.04–1.80 (m, 3H), 1.57–1.21 (m, 2H);  $^{13}\text{C}$  NMR (101 MHz,  $\text{CDCl}_3$ )  $\delta$  (ppm): 168.03, 167.96, 160.4, 159.5, 134.0 (2C), 132.05, 132.03, 123.30, 123.27, 51.5, 49.0, 38.5, 35.5, 34.6, 33.6, 32.3, 28.4, 27.5, 27.2, 26.5, 23.6; HRMS (ESI+):  $m/z$   $[\text{M}+\text{Na}]^+$  calculated for  $\text{C}_{15}\text{H}_{16}\text{N}_2\text{NaO}_3^+$ : 295.1053, found 295.1059.

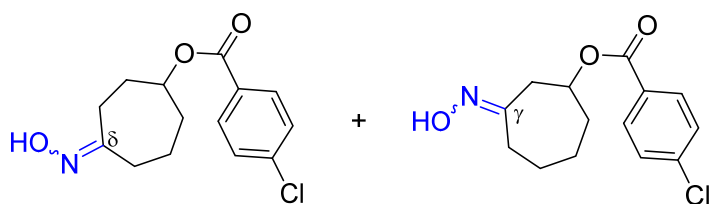

**(*E/Z*)-4-(hydroxyimino)cycloheptyl 4-chlorobenzoate (23a- $\delta$ -oxime) and (*E/Z*)-3-(hydroxyimino)cycloheptyl 4-chlorobenzoate (23a- $\gamma$ -oxime) (23a)** was synthesized by the general procedure A from cycloheptyl 4-chlorobenzoate (252.7 mg, 1 mmol) and purified by flash column chromatography on silica gel (gradient elution: Petroleum ether : EtOAc = 40:1 to 20:1 to 10:1 ) to afford two separated regioisomers (*E/Z*)-**23a- $\delta$ -oxime** (132.4 mg, 47% yield, *E/Z* = 1:1) and (*E/Z*)-**23a- $\gamma$ -oxime** (78.9 mg, 28% yield, *E/Z* = 1:1) as white solid ( $\gamma$ : $\delta$  = 1:1.7), and remaining starting material (27.8 mg, 11%);

The *E/Z* isomers were confirmed by  $^1\text{H}$  and  $^{13}\text{C}$  NMR and the ratio of *E/Z* isomers was determined by integration of  $^1\text{H}$  and  $^{13}\text{C}$  NMR spectra.

**(*E/Z*)-23a- $\delta$ -oxime:**

$^1\text{H}$  NMR (400 MHz,  $\text{CDCl}_3$ )  $\delta$  (ppm): 9.44 (brs, 1H), 7.97–7.92 (m, 2H), 7.40–7.35 (m, 2H), 5.22–5.16 (m, 0.5H), 5.14–5.08 (m, 0.5H), 2.84–2.74 (m, 0.5H), 2.66–2.53 (m, 2H), 2.48–2.30 (m, 1.5H), 2.06–1.82 (m, 5H), 1.70–1.58 (m, 1H);  $^{13}\text{C}$  NMR (101 MHz,  $\text{CDCl}_3$ )  $\delta$  (ppm): 164.89, 164.85, 162.9, 162.5, 139.38, 139.36, 131.01, 131.00, 129.1, 128.74, 128.72, 75.0, 74.3, 34.7, 34.6, 33.1, 32.2, 29.4, 28.3, 27.7, 22.7, 21.8, 18.8; **HRMS** (ESI)  $m/z$   $[\text{M}+\text{Na}]^+$  calculated for  $\text{C}_{14}\text{H}_{16}\text{ClNNaO}_3^+$ : 304.0711, found 304.0708.

**(*E/Z*)-23a- $\gamma$ -oxime:**

$^1\text{H}$  NMR (400 MHz,  $\text{CDCl}_3$ )  $\delta$  (ppm): 8.80 (brs, 1H), 7.98– 7.90 (m, 2H), 7.41–7.35 (m, 2H), 5.35–5.27 (m, 0.5H), 5.25–5.18 (m, 0.5H), 2.93 (d,  $J$  = 6.4 Hz, 0.80H), 2.84–2.78 (m, 0.6H), 2.73–2.67 (m, 0.6H), 2.63–2.48 (m, 1.5H), 2.40–2.57 (m, 0.50H), 2.04–1.57 (m, 6H);  $^{13}\text{C}$  NMR (101 MHz,  $\text{CDCl}_3$ )  $\delta$  (ppm): 165.0, 164.8, 159.2, 158.8, 139.5, 139.4, 131.13, 131.11, 129.08, 129.05, 128.80, 128.75, 72.5, 72.0, 38.4, 35.6, 35.0, 34.1, 33.6, 28.6, 27.1, 25.1, 24.5, 24.0; **HRMS** (ESI)  $m/z$   $[\text{M}+\text{Na}]^+$  calculated for  $\text{C}_{14}\text{H}_{16}\text{ClNNaO}_3^+$ : 304.0711, found 304.0708.

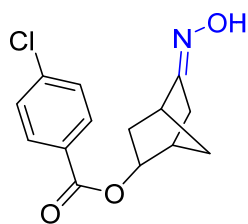

**endo/exo-5-(Hydroxyimino)bicyclo[2.2.1]heptan-2-yl 4-chlorobenzoate (24a)** was synthesized by the general procedure A from *endo/exo*-bicyclo[2.2.1]heptan-2-yl 4-chlorobenzoate (250.7 mg, 1 mmol, *endo/exo* = 9:1) and purified by flash column chromatography on silica gel (gradient elution: Petroleum ether : EtOAc = 20:1 to 10:1 ) to afford a mixture of *endo/exo*-**24a** isomers as colorless oil (**176.2 mg, 63% yield, *endo/exo* = 9:1**) and remaining starting material (57.6 mg, 23%);

The *endo/exo* isomers were confirmed by  $^1\text{H}$  and  $^{13}\text{C}$  NMR and the ratio of *endo/exo* isomers is the same as that of **24** which was determined by integration of  $^1\text{H}$  and  $^{13}\text{C}$  NMR spectra.

**Major *endo*-24a:**  $^1\text{H}$  NMR (400 MHz,  $\text{CDCl}_3$ )  $\delta$  (ppm): 8.61 (brs, 1H), 7.94 (d,  $J$  = 8.4 Hz, 2H), 7.40 (d,  $J$  = 8.8 Hz, 2H), 5.36–5.30 (m, 1H), 2.94–2.90 (m, 2H), 2.79–2.60 (m, 1H), 2.43–2.29 (m, 2H), 1.72–1.65 (m, 2H), 1.49 (d,  $J$  = 14.0 Hz, 1H);  $^{13}\text{C}$  NMR (101 MHz,  $\text{CDCl}_3$ )  $\delta$  (ppm): 166.2, 165.7, 139.7, 131.1, 128.9, 128.6, 74.6, 42.5, 39.7, 37.8, 35.4, 27.4.

**Minor *exo*-24a:**  $^1\text{H}$  NMR (400 MHz,  $\text{CDCl}_3$ )  $\delta$  (ppm): 8.61 (brs, 1H), 7.94 (d,  $J$  = 8.4 Hz, 2H), 7.40 (d,  $J$  = 8.8 Hz, 2H), 5.01–4.95 (m, 1H), 2.94–2.90 (m, 2H), 2.79–2.60 (m, 1H), 2.22–2.10 (m, 2H), 1.86–1.81 (m, 2H), 1.57 (d,  $J$  = 14.0 Hz, 1H);  $^{13}\text{C}$  NMR (101 MHz,  $\text{CDCl}_3$ )  $\delta$  (ppm): 165.4, 165.3, 139.7, 131.1, 128.9, 128.6, 74.6, 41.5, 41.1, 36.9, 36.2, 30.1.

**HRMS** (ESI)  $m/z$   $[\text{M}+\text{Na}]^+$  calculated for  $\text{C}_{14}\text{H}_{14}\text{ClINaO}_3^+$ : 302.0554, found 302.0564;

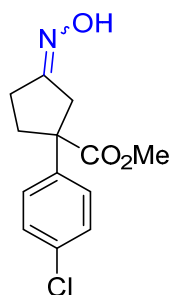

**Methyl (*E/Z*)-1-(4-chlorophenyl)-3-(hydroxyimino)cyclopentane-1-carboxylate (25a)** was synthesized by the general procedure A from methyl 1-(4-chlorophenyl)cyclopentane-1-carboxylate (238.7 mg, 1 mmol) and purified by flash column chromatography on silica gel

(gradient elution: Petroleum ether : EtOAc = 20:1 to 5:1 ) to afford (*E/Z*)-**25a** isomer as colorless oil (**179.4 mg, 67% yield, *E/Z* = 1.2:1**);

The *E/Z* isomers were confirmed by  $^{13}\text{C}$  NMR and ratio of *E/Z* isomers was determined by integration of  $^{13}\text{C}$  NMR spectrum.

$^1\text{H}$  NMR (400 MHz,  $\text{CDCl}_3$ )  $\delta$  (ppm): 9.17 (brs, 1H), 7.35–7.22 (m, 4H), 3.68–3.58 (m, 3.4H), 3.37 (d,  $J$  = 16.4 Hz, 0.6H), 2.88–2.72 (m, 2H), 2.67–2.44 (m, 2H), 2.15–1.99 (m, 1H);  $^{13}\text{C}$  NMR of (*E*)-**25a** (101 MHz,  $\text{CDCl}_3$ )  $\delta$  (ppm): 174.5, 163.5, 139.6, 133.5, 128.9, 128.1, 56.3, 53.0, 40.2, 34.1, 25.9;  $^{13}\text{C}$  NMR of (*Z*)-**25a** (101 MHz,  $\text{CDCl}_3$ )  $\delta$  (ppm): 174.7, 163.1, 140.1, 133.5, 128.8, 128.1, 56.2, 53.0, 37.4, 34.5, 28.9;

HRMS (ESI)  $m/z$   $[\text{M}+\text{Na}]^+$  calculated for  $\text{C}_{13}\text{H}_{14}\text{ClNNaO}_3^+$ : 290.0554, found 290.0563.

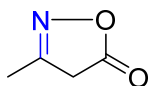

**3-Methylisoxazol-5(4H)-one (26a')**<sup>114</sup> was synthesized by the general procedure **A** from methyl butyrate (102.2 mg, 1 mmol) and purified by flash column chromatography on silica gel (gradient elution: Petroleum ether : EtOAc = 50:1 to 5:1 ) to afford the product **26a'** as colorless oil (**23.8 mg, 24% yield**).

$^1\text{H}$  NMR (400 MHz,  $\text{CDCl}_3$ )  $\delta$  (ppm): 3.39 (s, 2H), 2.16 (s, 3H);

$^{13}\text{C}$  NMR (101 MHz,  $\text{CDCl}_3$ )  $\delta$  (ppm): 175.3 (C=O), 163.5 (C=N), 37.1, 14.9.

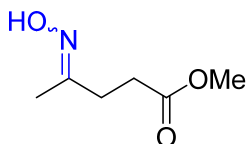

**Methyl (*E/Z*)-4-(hydroxyimino)pentanoate (27a)** was synthesized by the general Procedure **A** from methyl pentanoate (116.2 mg, 1 mmol). After completion of the reaction, the reaction solution was extracted with DCM, and the solvent DCM was removed to afford the product (*E/Z*)-**27a** isomer as colorless oil (**69.7 mg, 48% yield, *E/Z* = 3:1**); and the obtained product needs no further purification and was taken directly for NMR and HRMS analysis.

The *E/Z* isomers were confirmed by  $^1\text{H}$  and  $^{13}\text{C}$  NMR and the ratio of *E/Z* isomers was calculated by integration of  $^1\text{H}$  and  $^{13}\text{C}$  NMR spectra.

**Major (*E*)-27a:**  $^1\text{H}$  NMR (400 MHz,  $\text{CDCl}_3$ )  $\delta$  (ppm): 8.14 (brs, 1H), 3.68 (s, 3H), 2.55–2.51 (m, 4H), 1.89 (s, 3H);  $^{13}\text{C}$  NMR (101 MHz,  $\text{CDCl}_3$ )  $\delta$  (ppm): 173.4, 156.8, 51.9, 31.1, 30.3, 14.1;  
**Minor (*Z*)-27a:**  $^1\text{H}$  NMR (400 MHz,  $\text{CDCl}_3$ )  $\delta$  (ppm): 8.14 (brs, 1H), 3.69 (s, 3H), 2.68–2.56 (m, 4H), 1.89 (s, 3H);  $^{13}\text{C}$  NMR (101 MHz,  $\text{CDCl}_3$ )  $\delta$  (ppm): 173.4, 157.5, 52.0, 29.9, 24.4, 20.3;  
**HRMS** (ESI $^+$ ):  $m/z$   $[\text{M}+\text{Na}]^+$  calculated for  $\text{C}_6\text{H}_{11}\text{NNaO}_3^+$ : 168.0631 found 168.0629.

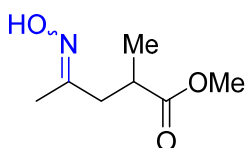

**Methyl (*E/Z*)-4-(hydroxyimino)-2-methylpentanoate (28a)** was synthesized by the general procedure **A** from methyl 2-methylpentanoate (130.2 mg, 1 mmol). After completion of the reaction, the reaction solution was extracted with DCM, and the solvent DCM was removed to afford the product of (*E/Z*)-**28a** isomer as colorless oil (**36.6 mg, 23% yield, *E/Z* =3:1**). The obtained product needs no further purification and was taken directly for NMR and HRMS analysis. *The *E/Z* isomers were confirmed by  $^1\text{H}$  and  $^{13}\text{C}$  NMR and the ratio of *E/Z* isomers was calculated by integration of  $^1\text{H}$  and  $^{13}\text{C}$  NMR spectra.*

**Major (*E*)-28a :**  $^1\text{H}$  NMR (400 MHz,  $\text{CDCl}_3$ )  $\delta$  (ppm): 8.22 (brs, 1H), 3.67 (s, 3H), 2.78 (dd,  $J$  = 14.0, 6.8 Hz, 1H), 2.62–2.55 (m, 1H), 2.27 (dd,  $J$  = 14.8, 6.8 Hz, 1H), 1.87 (s, 3H), 1.17 (d,  $J$  = 6.8 Hz, 3H);  $^{13}\text{C}$  NMR (101 MHz,  $\text{CDCl}_3$ )  $\delta$  (ppm): 176.4, 156.3, 52.0, 39.6, 36.7, 17.2, 14.0;  
**Minor (*Z*)-28a:**  $^1\text{H}$  NMR (400 MHz,  $\text{CDCl}_3$ )  $\delta$  (ppm): 8.22 (brs, 1H), 3.68 (s, 3H), 2.90 (dd,  $J$  = 14.4, 7.2 Hz, 1H), 2.62–2.55 (m, 1H), 2.27 (dd,  $J$  = 14.8, 6.8 Hz, 1H), 1.87 (s, 3H), 1.19 (d,  $J$  = 6.8 Hz, 3H);  $^{13}\text{C}$  NMR (101 MHz,  $\text{CDCl}_3$ )  $\delta$  (ppm): 176.4, 156.7, 52.0, 36.4, 32.7, 20.7, 17.4;  
**HRMS** (ESI $^+$ ):  $m/z$   $[\text{M}+\text{Na}]^+$  calculated for  $\text{C}_7\text{H}_{13}\text{NNaO}_3^+$ : 182.0788 found 182.0790.

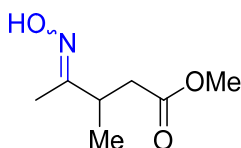

**Methyl (*E/Z*)-4-(hydroxyimino)-3-methylpentanoate (29a)** was synthesized by the general Procedure **A** from methyl 3-methylpentanoate (130.2 mg, 1 mmol). After completion of the reaction, the reaction solution was extracted with DCM, and the solvent DCM was removed to afford the product of (*E/Z*)-**29a** isomer as colorless oil (**51.2 mg, 32% yield, *E/Z* =10:1**). The obtained product needs no further purification and was taken directly for NMR and HRMS analysis.



The *E/Z* isomers were confirmed by  $^1\text{H}$  and  $^{13}\text{C}$  NMR, and the ratio of *E/Z* isomers was calculated by integration of  $^1\text{H}$  and  $^{13}\text{C}$  NMR spectra.

**Major (*E*)-29a:**  $^1\text{H}$  NMR (400 MHz,  $\text{CDCl}_3$ )  $\delta$  (ppm): 7.83 (brs, 1H), 3.67 (s, 3H), 2.91–2.79 (m, 1H), 2.62 (dd,  $J = 15.6, 7.2$  Hz, 1H), 2.33 (dd,  $J = 15.6, 7.6$  Hz, 1H), 1.87 (s, 1H), 1.13 (d,  $J = 6.8$  Hz, 3H);  $^{13}\text{C}$  NMR (101 MHz,  $\text{CDCl}_3$ )  $\delta$  (ppm): 172.8, 160.5, 51.8, 38.4, 36.7, 18.1, 12.1;

**Minor (*Z*)-29a:**  $^1\text{H}$  NMR (400 MHz,  $\text{CDCl}_3$ )  $\delta$  (ppm): 7.83 (brs, 1H), 3.68 (s, 3H), 2.97–2.90 (m, 1H), 2.56 (dd,  $J = 15.6, 7.2$  Hz, 1H), 2.39 (dd,  $J = 15.6, 7.6$  Hz, 1H), 1.81 (s, 1H), 1.11 (d,  $J = 6.8$  Hz, 3H);

**HRMS** (ESI $^+$ ):  $m/z$   $[\text{M}+\text{Na}]^+$  calculated for  $\text{C}_7\text{H}_{13}\text{NNaO}_3^+$ : 182.0788 found 182.0789.

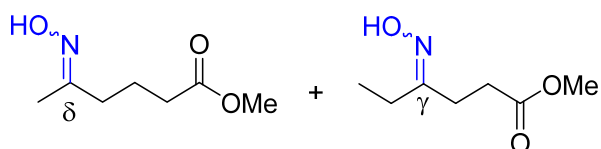

**Methyl (*E/Z*)-5-(hydroxyimino)hexanoate (30a- $\delta$ -oxime) and methyl (*E/Z*)-4-(hydroxyimino)hexanoate (30a- $\gamma$ -oxime) (30a)** was synthesized by the general procedure **A** from methyl hexanoate (130.2 mg, 1 mmol) and purified by flash column chromatography on silica gel (gradient elution: Petroleum ether : EtOAc = 40:1 to 10:1 ) to afford a mixture of two regioisomers (*E/Z*)-30a- $\delta$ -oxime and (*E/Z*)-30a- $\gamma$ -oxime as colorless oil (**100.3 mg, 63% yield,  $\gamma:\delta = 1:5$ ,  $\gamma$  *E/Z*=1:1;  $\delta$  *E/Z*=3:1**). The regioisomer (*E/Z*)-30a- $\delta$ -oxime was isolated from the mixture in 51% yield (81 mg).

Site of oximation was assigned based on analysis of the  $^1\text{H}$  and  $^{13}\text{C}$  NMR spectra of the mixture products with the isolated (*E/Z*)-30a- $\delta$ -oxime; The *E/Z* isomers were confirmed by  $^1\text{H}$  and  $^{13}\text{C}$  NMR and the ratio of *E/Z* isomers was calculated by integration of  $^1\text{H}$  and  $^{13}\text{C}$  NMR spectra.

$^1\text{H}$  NMR (400 MHz,  $\text{CDCl}_3$ )  $\delta$  (ppm): 8.92 (brs, 1H), 3.66 (s, 3H), 2.43–2.29 (m, 2.5H), 2.21 (t,  $J = 7.6$  Hz, 1.5H), 1.89–1.77 (m, 5H);

$^{13}\text{C}$  NMR (101 MHz,  $\text{CDCl}_3$ )  $\delta$  (ppm): 173.8(4C), 161.0, 160.9, 158.0, 157.7, 51.85, 51.70, 51.67, 35.2, 33.8, 33.3, 30.3, 30.0, 29.8, 28.7, 28.0, 27.9, 23.5, 21.5, 20.9, 19.9, 13.5, 10.7, 10.1;

**HRMS** (ESI $^+$ ):  $m/z$  calculated for  $\text{C}_7\text{H}_{13}\text{NNaO}_3^+$ : 182.0788 found 182.0791;

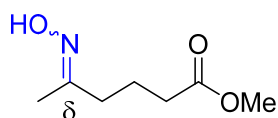

**Methyl (*E/Z*)-5-(hydroxyimino)hexanoate (30a- $\delta$ -oxime):**  $^1\text{H}$  NMR (400 MHz,  $\text{CDCl}_3$ )  $\delta$  (ppm): 9.33 (brs, 1H), 3.62 (s, 3H), 2.40–2.16 (m, 4H), 1.85–1.77 (m, 5H);  $^{13}\text{C}$  NMR of (*E*)-30a- $\delta$ -oxime: (101 MHz,  $\text{CDCl}_3$ )  $\delta$  (ppm): 173.7, 157.5, 51.6, 35.0, 33.2, 21.5, 13.4;  $^{13}\text{C}$  NMR of (*Z*)-30a- $\delta$ -oxime (101 MHz,  $\text{CDCl}_3$ )  $\delta$  (ppm): 173.7, 157.8, 51.6, 33.7, 27.9, 20.8, 19.7.

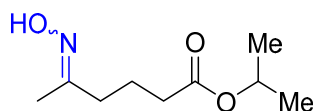

**Isopropyl (*E/Z*)-5-(hydroxyimino)hexanoate (31a)** was synthesized by the general Procedure A from isopropyl hexanoate (158.2 mg, 1 mmol) and purified by flash column chromatography on silica gel (gradient elution: Petroleum ether : EtOAc = 40:1 to 10:1 ) to afford the product (*E/Z*)-31a isomer as colorless oil (**86.1mg, 46% yield, *E/Z* = 3:1**).

The *E/Z* isomers were confirmed by  $^1\text{H}$  and  $^{13}\text{C}$  NMR and the ratio of *E/Z* isomers was calculated by integration of  $^1\text{H}$  and  $^{13}\text{C}$  NMR spectra.

**Major (*E*)-31a:**  $^1\text{H}$  NMR (400 MHz,  $\text{CDCl}_3$ )  $\delta$  (ppm): 8.49 (brs, 1H), 5.05–4.95 (m, 1H), 2.33–2.26 (m, 2H), 2.21 (t,  $J = 7.6$  Hz, 2H), 1.87 (s, 3H), 1.83 (t,  $J = 7.6$  Hz, 2H), 1.21 (d,  $J = 6.4$  Hz, 6H);  $^{13}\text{C}$  NMR (101 MHz,  $\text{CDCl}_3$ )  $\delta$  (ppm): 172.9, 157.8, 67.8, 35.2, 34.0, 22.0, 21.7, 13.5.

**Minor (*Z*)-31a:**  $^1\text{H}$  NMR (400 MHz,  $\text{CDCl}_3$ )  $\delta$  (ppm): 8.49 (brs, 1H), 5.03–4.96 (m, 1H), 2.40 (t,  $J = 7.6$  Hz, 2H), 2.33–2.26 (m, 2H), 1.86 (s, 3H), 1.81 (t,  $J = 7.6$  Hz, 2H), 1.21 (d,  $J = 6.4$  Hz, 6H);  $^{13}\text{C}$  NMR (101 MHz,  $\text{CDCl}_3$ )  $\delta$  (ppm): 172.9, 158.2, 67.8, 34.4, 28.0, 21.2, 21.0, 19.9;

**HRMS** (ESI $^+$ ):  $m/z$  calculated for  $\text{C}_9\text{H}_{17}\text{NNaO}_3^+$ : 210.1101 found 210.1098.

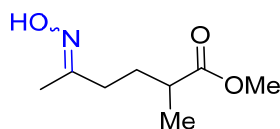

**Methyl (*E/Z*)-5-(hydroxyimino)-2-methylhexanoate (32a)** was synthesized by the general procedure A from methyl 2-methylhexanoate (144.2 mg, 1 mmol) and purified by flash column chromatography on silica gel (gradient elution: Petroleum ether : EtOAc = 40:1 to 10:1 ) to afford the product (*E/Z*)-32a isomer as colorless oil (**77.9 mg, 45% yield, *E/Z* = 3:1**).

The *E/Z* isomers were confirmed by  $^1\text{H}$  and  $^{13}\text{C}$  NMR, and the ratio of *E/Z* isomers was calculated by integration of  $^1\text{H}$  and  $^{13}\text{C}$  NMR spectra.

**Major (E)-32a:**  $^1\text{H}$  NMR (400 MHz,  $\text{CDCl}_3$ )  $\delta$  (ppm): 8.72 (brs, 1H), 3.66 (s, 3H), 2.52–2.42 (m, 1H), 2.21–2.15 (m, 2H), 1.86 (s, 3H), 1.66–1.56 (m, 2H), 1.18 (d,  $J = 7.2$  Hz, 3H);  $^{13}\text{C}$  NMR (101 MHz,  $\text{CDCl}_3$ )  $\delta$  (ppm): 176.9, 157.9, 51.8, 39.0, 33.6, 30.1, 17.1, 13.6;

**Minor (Z)-32a:**  $^1\text{H}$  NMR (400 MHz,  $\text{CDCl}_3$ )  $\delta$  (ppm): 8.71 (brs, 1H), 3.67 (s, 3H), 2.52–2.42 (m, 1H), 2.42–2.39 (m, 2H), 1.94–1.86 (m, 2H), 1.85 (s, 3H), 1.16 (d,  $J = 7.2$  Hz, 3H);  $^{13}\text{C}$  NMR (101 MHz,  $\text{CDCl}_3$ )  $\delta$  (ppm): 176.9, 158.3, 50.8, 39.4, 29.3, 26.5, 19.9;

**HRMS** (ESI $^+$ ):  $m/z$   $[\text{M}+\text{Na}]^+$  calculated for  $\text{C}_8\text{H}_{15}\text{NNaO}_3^+$ : 196.0944 found 196.0946.

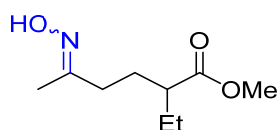

**Methyl (E/Z)-2-ethyl-5-(hydroxyimino)hexanoate (33a)** was synthesized by the general procedure A from methyl 2-ethylhexanoate (158.3 mg, 1 mmol) and purified by flash column chromatography on silica gel (gradient elution: Petroleum ether : EtOAc = 40:1 to 10:1 ) to afford the product (E/Z)-33a isomer as colorless oil (74.9 mg, 40% yield, E/Z = 3:1).

The E/Z isomers was confirmed by  $^1\text{H}$  and  $^{13}\text{C}$  NMR and the ratio of E/Z isomers was calculated by integration of  $^1\text{H}$  and  $^{13}\text{C}$  NMR spectra.

$^1\text{H}$  NMR (400 MHz,  $\text{CDCl}_3$ )  $\delta$  (ppm): 8.78 (brs, 1H), 3.66 (s, 3H), 2.33–2.23 (m, 1H), 2.15 (t,  $J = 7.6$  Hz, 1H), 1.90–1.74 (m, 4H), 1.69–1.47 (m, 4H), 0.90–0.84 (m, 3H);

**Major (E)-33a:**  $^{13}\text{C}$  NMR (101 MHz,  $\text{CDCl}_3$ )  $\delta$  (ppm): 176.4, 157.8, 51.59, 46.6, 33.8, 28.3, 25.4, 13.6, 11.7; **Minor (Z)-33a:**  $^{13}\text{C}$  NMR (101 MHz,  $\text{CDCl}_3$ )  $\delta$  (ppm): 176.4, 158.2, 51.55, 47.0, 27.4, 26.7, 25.4, 19.9, 11.7;

**HRMS** (ESI $^+$ ):  $m/z$  calculated for  $\text{C}_9\text{H}_{17}\text{NNaO}_3^+$ : 210.1101 found 210.1103.

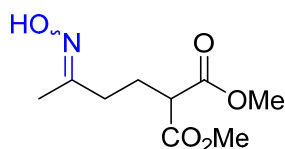

**Dimethyl (E/Z)-2-(3-(hydroxyimino)butyl)malonate (34a)** was synthesized by the general procedure A from dimethyl 2-butylmalonate (188.2 mg, 1 mmol) and purified by flash column chromatography on silica gel (gradient elution: Petroleum ether : EtOAc = 40:1 to 10:1 ) to afford

the product (*E/Z*)-**34a** isomer as colorless oil (**99.9 mg, 46% yield**), and remaining starting material (75.3 mg, 40%).

The *E/Z* isomers was confirmed by  $^1\text{H}$  and  $^{13}\text{C}$  NMR and the ratio of *E/Z* isomers (*E/Z* = **3:1**) was calculated by integration of  $^1\text{H}$  and  $^{13}\text{C}$  NMR spectra.

**Major (*E*)-34a:**  $^1\text{H}$  NMR (400 MHz,  $\text{CDCl}_3$ )  $\delta$  (ppm): 8.64 (brs, 1H), 3.71 (s, 6H), 3.42–3.33 (m, 1H), 2.24–2.19 (m, 2H), 2.14–2.07 (m, 2H), 1.86 (s, 3H);  $^{13}\text{C}$  NMR (101 MHz,  $\text{CDCl}_3$ )  $\delta$  (ppm): 169.6, 157.0, 52.7, 50.9, 33.5, 25.3, 13.6.

**Minor (*Z*)-34a:**  $^1\text{H}$  NMR (400 MHz,  $\text{CDCl}_3$ )  $\delta$  (ppm): 8.64 (brs, 1H), 3.72 (s, 6H), 3.42–3.33 (m, 1H), 2.43–2.36 (m, 2H), 2.14–2.07 (m, 2H), 1.86 (s, 3H);  $^{13}\text{C}$  NMR (101 MHz,  $\text{CDCl}_3$ )  $\delta$  (ppm): 169.6, 157.3, 52.7, 51.3, 26.4, 24.7, 19.8.

**HRMS** (ESI<sup>+</sup>):  $m/z$   $[\text{M}+\text{Na}]^+$  calculated for  $\text{C}_9\text{H}_{15}\text{NNaO}_5^+$ : 240.0842. found 240.0840.

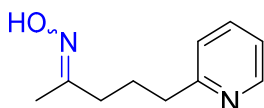

(*E/Z*)-**5-(Pyridin-3-yl)pentan-2-one oxime (35a)** was synthesized by the general procedure **A** from 3-pentylpyridine (149.3 mg, 1 mmol) and purified by flash column chromatography on silica gel (gradient elution: Petroleum ether : EtOAc = 10:1 to 2:1 ) to afford the product (*E/Z*)-**35a** isomer as colorless oil (**101.6 mg, 57% yield, *E/Z* = 3:1**) and remaining starting material (35.8 mg, 24%).

The *E/Z* isomers was confirmed by  $^1\text{H}$  and  $^{13}\text{C}$  NMR and the ratio of *E/Z* isomers was calculated by integration of  $^1\text{H}$  and  $^{13}\text{C}$  NMR spectra.

**Major (*E*)-35a:**  $^1\text{H}$  NMR (400 MHz,  $\text{CDCl}_3$ )  $\delta$  (ppm): 9.88 (brs, 1H), 8.52–8.48 (m, 1H), 7.59–7.53 (m, 1H), 7.17–7.06 (m, 2H), 2.79 (t,  $J$  = 7.6 Hz, 2H), 2.23 (t,  $J$  = 7.6 Hz, 2H), 1.99–1.89 (m, 2H), 1.86 (s, 3H);  $^{13}\text{C}$  NMR (101 MHz,  $\text{CDCl}_3$ )  $\delta$  (ppm): 161.6, 157.7, 149.2, 136.7, 123.1, 121.2, 37.6, 35.5, 26.5, 13.5.

**Minor (*Z*)-35a:**  $^1\text{H}$  NMR (400 MHz,  $\text{CDCl}_3$ )  $\delta$  (ppm): 9.88 (brs, 1H), 8.52–8.48 (m, 1H), 7.59–7.53 (m, 1H), 7.17–7.06 (m, 2H), 2.83 (t,  $J$  = 7.6 Hz, 2H), 2.44 (t,  $J$  = 7.6 Hz, 2H), 1.98–1.90 (m, 2H), 1.85 (s, 3H);  $^{13}\text{C}$  NMR (101 MHz,  $\text{CDCl}_3$ )  $\delta$  (ppm): 161.6, 158.1, 149.2, 136.7, 123.0, 121.3, 38.1, 28.4, 25.7, 19.9.

**HRMS** (ESI<sup>+</sup>):  $m/z$   $[\text{M}+\text{H}]^+$  calculated for  $\text{C}_{10}\text{H}_{15}\text{N}_2\text{O}^+$ : 179.1179, found 179.1176.

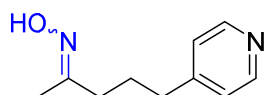

**(*E/Z*)-5-(Pyridin-4-yl)pentan-2-one oxime (36a)** was synthesized by the general procedure A from 4-pentylpyridine (149.3 mg, 1 mmol), and purified by flash column chromatography on silica gel (gradient elution: Petroleum ether : EtOAc = 10:1 to 4:1 ) to afford the product (*E/Z*)-**36a** isomer as white solid (**67.7 mg, 38% yield, *E/Z* = 3:1**), and remaining starting material (64.2 mg, 43%).

*The E/Z isomers was confirmed by <sup>1</sup>H and <sup>13</sup>C NMR and the ratio of E/Z isomers was calculated by integration of <sup>1</sup>H and <sup>13</sup>C NMR spectra.*

**Major (*E*)-36a:** <sup>1</sup>H NMR (400 MHz, CDCl<sub>3</sub>) δ (ppm): 9.76 (brs, 1H), 8.48–8.45 (m, 2H), 7.14–7.09 (m, 2H), 2.67–2.59 (m, 2H), 2.22 (t, *J* = 7.6 Hz, 2H), 1.88–1.82 (m, 5H); <sup>13</sup>C NMR (101 MHz, CDCl<sub>3</sub>) δ (ppm): 157.4, 151.2, 149.6, 124.1, 35.3, 34.6, 26.8, 13.6;

**Minor (*Z*)-36a:** <sup>1</sup>H NMR (400 MHz, CDCl<sub>3</sub>) δ (ppm): 9.76 (brs, 1H), 8.48–8.45 (m, 2H), 7.14–7.09 (m, 2H), 2.67–2.59 (m, 2H), 2.41 (t, *J* = 7.6 Hz, 1H), 1.88–1.82 (m, 5H); <sup>13</sup>C NMR (101 MHz, CDCl<sub>3</sub>) δ (ppm): 157.4, 151.2, 149.6, 124.0, 35.2, 28.3, 26.1, 20.0;

**HRMS** (ESI<sup>+</sup>): *m/z* [M+H]<sup>+</sup> calculated for C<sub>10</sub>H<sub>15</sub>N<sub>2</sub>O<sup>+</sup>: 179.1179, found 179.1183.

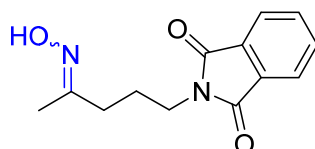

**(*E/Z*)-2-(4-(Hydroxyimino)pentyl)isoindoline-1,3-dione (37a)** was synthesized by the general procedure A from 2-pentylisoindoline-1,3-dione (217.3 mg, 1 mmol) and purified by flash column chromatography on silica gel (gradient elution: Petroleum ether : EtOAc = 10:1 to 1:1 ) to afford the product (*E/Z*)-**37a** isomer as white solid (**96.1 mg, 39% yield, *E/Z* = 3:1**), and remaining starting material (126.0 mg, 58%).

*The E/Z isomers was confirmed by <sup>1</sup>H and <sup>13</sup>C NMR and the ratio of E/Z isomers was calculated by integration of <sup>1</sup>H and <sup>13</sup>C NMR spectra.*

**Major (*E*)-37a:** <sup>1</sup>H NMR (400 MHz, CDCl<sub>3</sub>) δ (ppm): 8.67 (brs, 1H), 7.84–7.79 (m, 2H), 7.71–7.65 (m, 2H), 3.72–3.65 (m, 2H), 2.23 (t, *J* = 7.6 Hz, 2H), 1.93–1.85 (m, 2H), 1.85 (s, 3H); <sup>13</sup>C NMR (101 MHz, CDCl<sub>3</sub>) δ (ppm): 168.5, 157.3, 134.1, 132.2, 123.4, 37.6, 33.3, 25.1, 13.6;

**Minor (Z)-37a:**  $^1\text{H}$  NMR (400 MHz,  $\text{CDCl}_3$ )  $\delta$  (ppm): 8.67 (brs, 1H), 7.84–7.79 (m, 2H), 7.71–7.65 (m, 2H), 3.72–3.65 (m, 2H), 2.42 (t,  $J = 7.6$  Hz, 2H), 1.93–1.85 (m, 2H), 1.85 (s, 3H);  $^{13}\text{C}$  NMR (101 MHz,  $\text{CDCl}_3$ )  $\delta$  (ppm): 168.5, 157.7, 134.1, 132.2, 123.4, 38.0, 26.1, 24.5, 19.8; HRMS (ESI $^+$ ):  $m/z$   $[\text{M}+\text{Na}]^+$  calculated for  $\text{C}_{13}\text{H}_{14}\text{N}_2\text{NaO}_3^+$ : 269.0897, found 269.0900.

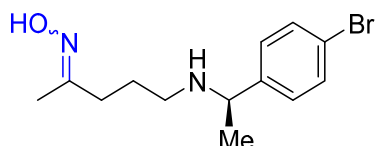

**(R,E/Z)-5-((1-(4-Bromophenyl)ethyl)amino)pentan-2-one oxime (38a)** was synthesized by the general procedure A from (*R*)-*N*-(1-(4-bromophenyl)ethyl)pentan-1-amine (270.2 mg, 1 mmol) and purified by flash column chromatography on silica gel (gradient elution: Petroleum ether : EtOAc = 10:1 to 1:2 ) to afford the product **(R,E/Z)-38a** isomer as colorless oil (**131.7 mg, 44% yield, E/Z = 3:1**), and remaining starting material (86.4 mg, 32%).

The *E/Z* isomers was confirmed by  $^1\text{H}$  and  $^{13}\text{C}$  NMR and the ratio of *E/Z* isomers was calculated by integration of  $^1\text{H}$  and  $^{13}\text{C}$  NMR spectra.

**Major (R,E)-38a :**  $^1\text{H}$  NMR (400 MHz,  $\text{CDCl}_3$ )  $\delta$  (ppm): 7.43–7.40 (m, 2H), 7.19–7.15 (m, 2H), 5.49 (brs, 1H), 3.74–3.68 (m, 1H), 2.52–2.26 (m, 3H), 2.21–2.11 (m, 1H), 1.83 (s, 3H), 1.73–1.60 (m, 2H), 1.31 (d,  $J = 6.8$  Hz, 3H);  $^{13}\text{C}$  NMR (101 MHz,  $\text{CDCl}_3$ )  $\delta$  (ppm): 157.5, 144.33, 131.6, 128.5, 120.6, 57.83, 46.95, 33.6, 26.5, 24.1, 13.6.

**Minor (R,Z)-38a :**  $^1\text{H}$  NMR (400 MHz,  $\text{CDCl}_3$ )  $\delta$  (ppm): 7.43–7.40 (m, 2H), 7.19–7.15 (m, 2H), 5.49 (brs, 1H), 3.74–3.68 (m, 1H), 2.52–2.26 (m, 3H), 2.21–2.11 (m, 1H), 1.81 (s, 3H), 1.73–1.60 (m, 2H), 1.31 (d,  $J = 6.8$  Hz, 3H);  $^{13}\text{C}$  NMR (101 MHz,  $\text{CDCl}_3$ )  $\delta$  (ppm): 158.0, 144.37, 131.6, 128.5, 120.6, 57.75, 47.01, 26.2, 25.6, 21.2, 19.9.

HRMS (ESI $^+$ ):  $m/z$   $[\text{M}+\text{H}]^+$  calculated for  $\text{C}_{13}\text{H}_{20}\text{BrN}_2\text{O}^+$ : 299.0754, found 299.0759.

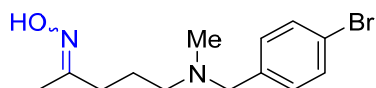

**(E/Z)-5-((4-Bromobenzyl)(methyl)amino)pentan-2-one oxime (39a)** was synthesized by the general procedure A from *N*-(4-bromobenzyl)-*N*-methylpentan-1-amine (270.2 mg, 1 mmol) and purified by flash column chromatography on silica gel (gradient elution: Petroleum ether : EtOAc

= 10:1 to 1:3 ) to afford the product (***E/Z***-39a isomer as colorless oil (122.7 mg, 41% yield, *E/Z* = 3:1), and remaining starting material (148.6 mg, 55%).

The *E/Z* isomers was confirmed by <sup>1</sup>H and <sup>13</sup>C NMR and the ratio of *E/Z* isomers was calculated by integration of <sup>1</sup>H and <sup>13</sup>C NMR spectra.

**Major (*E*)-39a :** <sup>1</sup>H NMR (400 MHz, CDCl<sub>3</sub>) δ (ppm): 7.42–7.39 (m, 2H), 7.19–7.16 (m, 2H), 3.42 (s, 2H), 2.37 (t, *J* = 7.6 Hz, 2H), 2.21–2.16 (m, 2H), 2.15 (s, 3H), 1.86 (s, 3H), 1.72 (quint, *J* = 7.6 Hz, 2H); <sup>13</sup>C NMR (101 MHz, CDCl<sub>3</sub>) δ (ppm): 157.8, 137.1, 131.3, 130.9, 120.8, 61.6, 56.7, 41.90, 33.7, 23.9, 13.6.

**Minor (*Z*)-39a:** <sup>1</sup>H NMR (400 MHz, CDCl<sub>3</sub>) δ (ppm): 7.42–7.39 (m, 2H), 7.19–7.16 (m, 2H), 3.43 (s, 2H), 2.38 (t, *J* = 7.6 Hz, 2H), 2.21–2.16 (m, 2H), 2.16 (s, 3H), 1.85 (s, 3H), 1.72 (quint, *J* = 7.6 Hz, 2H); <sup>13</sup>C NMR (101 MHz, CDCl<sub>3</sub>) δ (ppm): 158.3, 137.7, 131.3, 130.9, 120.8, 61.5, 57.0, 41.85, 26.6, 23.1, 20.0.

**HRMS** (ESI+): *m/z* [M+H]<sup>+</sup> calculated for C<sub>13</sub>H<sub>20</sub>BrN<sub>2</sub>O<sup>+</sup>: 299.0754, found 299.0751.

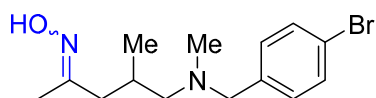

**(*E/Z*)-5-((4-Bromobenzyl)(methyl)amino)-4-methylpentan-2-one oxime (40a)** was synthesized by the general procedure A from *N*-(4-bromobenzyl)-*N*-methylpentan-1-amine (284.2 mg, 1 mmol) and purified by flash column chromatography on silica gel (gradient elution: Petroleum ether : EtOAc = 10:1 to 1:3 ) to afford the product (***E/Z***-40a isomer as colorless oil (103.4 mg, 33% yield, *E/Z* = 10:3), and remaining starting material (179.1 mg, 63%).

The *E/Z* isomers was confirmed by <sup>1</sup>H and <sup>13</sup>C NMR and the ratio of *E/Z* isomers was calculated by integration of <sup>1</sup>H and <sup>13</sup>C NMR spectra.

**Major (*E*)-40a:** <sup>1</sup>H NMR (400 MHz, CDCl<sub>3</sub>) δ (ppm): 9.32 (brs, 1H), 7.43–7.39 (m, 2H), 7.21–7.17 (m, 2H), 3.40 (s, 2H), 2.40 (dd, *J* = 13.6, 4.8 Hz, 1H), 2.21–2.10 (m, 6H), 2.02–1.91 (m, 1H), 1.86 (s, 3H), 0.87 (d, *J* = 6.8 Hz, 3H); <sup>13</sup>C NMR (101 MHz, CDCl<sub>3</sub>) δ (ppm): 157.9, 138.5, 131.4, 130.7, 120.7, 64.2, 62.2, 42.6, 41.3, 29.0, 18.2, 13.8.

**Minor (*Z*)-40a:** <sup>1</sup>H NMR (400 MHz, CDCl<sub>3</sub>) δ (ppm): 9.32 (brs, 1H), 7.43–7.39 (m, 2H), 7.21–7.17 (m, 2H), 3.40 (s, 2H), 2.50 (dd, *J* = 13.2, 4.8 Hz, 1H), 2.21–1.90 (m, 7H), 1.87 (s, 3H), 0.91 (d, *J* = 6.0 Hz, 3H); <sup>13</sup>C NMR (101 MHz, CDCl<sub>3</sub>) δ (ppm): 158.3, 138.5, 131.4, 130.7, 120.7, 64.5, 62.1, 42.6, 34.3, 28.9, 20.9, 18.6.

**HRMS** (ESI<sup>+</sup>):  $m/z$   $[M+H]^+$  calculated for C<sub>14</sub>H<sub>22</sub>BrN<sub>2</sub>O<sup>+</sup>: 313.0910, found 313.0909.

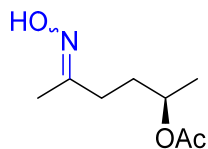

**(*R,E/Z*)-5-(Hydroxyimino)hexan-2-yl acetate (41a)** was synthesized by the general procedure **A** from (*R*)-hexan-2-yl acetate (144.2 mg, 1 mmol). After completion of the reaction, extraction with DCM, the solvent of DCM was removed to afford the product (*R,E/Z*)-**41a** isomer as colorless oil (**71.0 mg, 41% yield, *E/Z* = 3:1**), and the obtained product needs no further purification and taken directly for NMR and HRMS analysis.

The *E/Z* isomers was confirmed by <sup>1</sup>H and <sup>13</sup>C NMR and the ratio of *E/Z* isomers was calculated by integration of <sup>1</sup>H and <sup>13</sup>C NMR spectra.

**Major (*R,E*)-41a:** <sup>1</sup>H NMR (400 MHz, CDCl<sub>3</sub>) δ (ppm): 8.61 (brs, 1H), 4.94–4.83 (m, 1H), 2.25–2.18 (m, 2H), 2.02 (s, 3H), 1.87 (s, 3H), 1.83–1.66 (m, 2H), 1.23 (t, *J* = 6.6 Hz, 3H); <sup>13</sup>C NMR (101 MHz, CDCl<sub>3</sub>) δ (ppm): 170.9, 157.8, 70.5, 32.3, 32.1, 21.4, 20.0, 13.7.

**Minor (*R,Z*)-41a:** <sup>1</sup>H NMR (400 MHz, CDCl<sub>3</sub>) δ (ppm): 8.61 (brs, 1H), 4.92–4.84 (m, 1H), 2.44–2.32 (m, 2H), 2.03 (s, 3H), 1.86 (s, 3H), 1.83–1.66 (m, 2H), 1.26 (t, *J* = 6.6 Hz, 3H); <sup>13</sup>C NMR (101 MHz, CDCl<sub>3</sub>) δ (ppm): 171.0, 158.1, 70.8, 31.5, 24.9, 20.0, 19.9, 13.7.

**HRMS** (ESI<sup>+</sup>):  $m/z$   $[M+Na]^+$  calculated for C<sub>8</sub>H<sub>15</sub>NNaO<sub>3</sub><sup>+</sup>: 196.0944, found 196.0943.

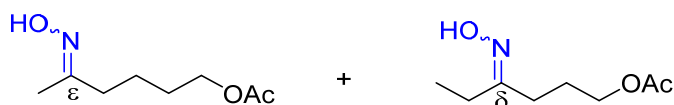

**(*E/Z*)-5-(Hydroxyimino)hexyl acetate (42a-ε-oxime)** and **(*E/Z*)-4-(hydroxyimino)hexyl acetate (42a-δ-oxime) (42a)** was synthesized by the general procedure **A** from hexyl acetate (144.2 mg, 1 mmol) and purified by flash column chromatography on silica gel (gradient elution: Petroleum ether : EtOAc = 40:1 to 10:1 ) to afford a mixture of two regioisomers (*E/Z*)-**42a-ε-oxime** and (*E/Z*)-**42a-δ-oxime** as colorless oil (**97.0 mg, 56% yield, δ:ε = 1:9, δ, *E/Z* = 1:1; ε, *E/Z* = 3:1**), and the product of **42a-ε-oxime** (**85.2 mg, 49% yield** ) was isolated from two regioisomers mixture.



Site of oximation was assigned based on analysis of the  $^1\text{H}$  and  $^{13}\text{C}$  NMR spectra of the mixture products with the isolated (*E/Z*)-**42a- $\epsilon$ -oxime**. The *E/Z* isomers were confirmed by  $^1\text{H}$  and  $^{13}\text{C}$  NMR and the ratio of *E/Z* isomers was calculated by integration of  $^{13}\text{C}$  NMR spectrum.

$^1\text{H}$  NMR (400 MHz,  $\text{CDCl}_3$ )  $\delta$  (ppm): 9.08 (brs, 1H), 4.28–4.22 (m, 0.20H), 4.10–4.01 (m, 1.82H), 2.66 (t,  $J = 6.8$  Hz, 0.10H), 2.49 (t,  $J = 6.8$  Hz, 0.10H), 2.42–3.30 (m, 0.86H), 2.27–2.17 (m, 1.51H), 2.02 (s, 3H), 1.85 and 1.84 (s, 1.75H), 1.69–1.51 (m, 2.85H), 1.06 (t,  $J = 7.6$  Hz, 0.73H), 0.96–0.89 (m, 0.52H);

$^{13}\text{C}$  NMR (101 MHz,  $\text{CDCl}_3$ )  $\delta$  (ppm): 171.4(2C), 171.3(2C), 161.7, 161.6, 158.4, 158.1, 64.4, 64.22, 64.18, 63.9, 35.4, 30.3, 28.6, 28.1, 27.6, 25.2, 24.8, 24.4, 22.7, 22.0, 21.09, 21.03, 21.00, 20.97, 19.8, 19.5, 13.5, 10.8, 10.1;

HRMS (ESI $^+$ ):  $m/z$   $[\text{M}+\text{Na}]^+$  calculated for  $\text{C}_8\text{H}_{15}\text{NNaO}_3^+$ : 196.0944, found 196.0946.

**(*E*)-42a- $\epsilon$ -oxime:**

$^1\text{H}$  NMR (400 MHz,  $\text{CDCl}_3$ )  $\delta$  (ppm): 8.97 (brs, 1H), 4.10–4.02 (m, 2H), 2.20 (t,  $J = 7.2$  Hz, 2H), 2.02 (s, 3H), 1.86 (s, 3H), 1.68–1.51 (m, 4H);  $^{13}\text{C}$  NMR (101 MHz,  $\text{CDCl}_3$ )  $\delta$  (ppm): 171.4, 158.2, 64.21, 35.4, 28.2, 22.7, 21.1, 13.5.

**(*Z*)-42a- $\epsilon$ -oxime:**

$^1\text{H}$  NMR (400 MHz,  $\text{CDCl}_3$ )  $\delta$  (ppm): 8.97 (brs, 1H), 4.10–4.02 (m, 2H), 2.38 (t,  $J = 7.6$  Hz, 2H), 2.02 (s, 3H), 1.85 (s, 3H), 1.68–1.51 (m, 4H);  $^{13}\text{C}$  NMR (101 MHz,  $\text{CDCl}_3$ )  $\delta$  (ppm): 171.4, 158.5, 64.24, 30.2, 28.6, 22.1, 21.0, 19.8.

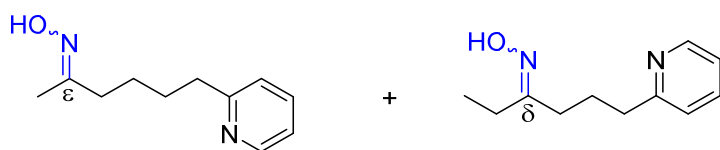

**(*E/Z*)-6-(pyridin-2-yl)hexan-2-one oxime (43a- $\epsilon$ -oxime) and (*E/Z*)-6-(pyridin-2-yl)hexan-3-one oxime (43a- $\delta$ -oxime) (43a)** was synthesized by the general procedure A from 2-hexylpyridine (163.3 mg, 1 mmol) and purified by flash column chromatography on silica gel (gradient elution: Petroleum ether : EtOAc = 10:1 to 2:1 ) to afford two separated regioisomers (*E/Z*)-**43a- $\epsilon$ -oxime** (98.1 mg, 51% yield, *E/Z*=3:1) and (*E/Z*)-**43a- $\delta$ -oxime** (23.1 mg, 12% yield, *E/Z* = 1:1) as white solid ( $\epsilon$ : $\delta$  = 4.3:1) and remaining starting material (36.5 mg, 22%).

The *E/Z* isomers were confirmed by  $^1\text{H}$ , and  $^{13}\text{C}$  NMR spectra and the ratio of *E/Z* isomers was calculated by integration of  $^1\text{H}$  and  $^{13}\text{C}$  NMR spectra.

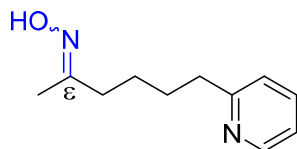

**(*E*)-43a-ε-oxime:**

$^1\text{H}$  NMR (400 MHz,  $\text{CDCl}_3$ )  $\delta$  (ppm): 8.49–8.46 (m, 1H), 7.55 (t,  $J = 7.6$  Hz, 1H), 7.13–7.04 (m, 2H), 2.85–2.75 (m, 2H), 2.19 (t,  $J = 7.6$  Hz, 2H), 1.82 (s, 3H), 1.77–1.66 (m, 2H), 1.58–1.49 (m, 2H);  $^{13}\text{C}$  NMR (101 MHz,  $\text{CDCl}_3$ )  $\delta$  (ppm): 161.9, 157.9, 148.9, 136.7, 123.0, 121.1, 37.7, 35.6, 29.4, 26.0, 13.4.

**(*Z*)-43a-ε-oxime:**

$^1\text{H}$  NMR (400 MHz,  $\text{CDCl}_3$ )  $\delta$  (ppm): 8.49–8.46 (m, 1H), 7.55 (t,  $J = 7.6$  Hz, 1H), 7.13–7.04 (m, 2H), 2.85–2.75 (m, 2H), 2.39 (t,  $J = 7.6$  Hz, 2H), 1.80 (s, 3H), 1.77–1.66 (m, 2H), 1.58–1.49 (m, 2H);  $^{13}\text{C}$  NMR (101 MHz,  $\text{CDCl}_3$ )  $\delta$  (ppm): 162.0, 158.3, 148.9, 136.7, 123.0, 121.1, 37.8, 29.9, 28.4, 25.2, 19.9.

**HRMS** (ESI $^+$ ):  $m/z$   $[\text{M}+\text{H}]^+$  calculated for  $\text{C}_{11}\text{H}_{17}\text{N}_2\text{O}^+$ : 193.1335, found 193.1338.

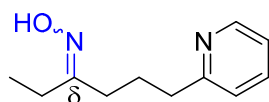

**(*E/Z*)-43a-δ-oxime:**

$^1\text{H}$  NMR (400 MHz,  $\text{CDCl}_3$ )  $\delta$  (ppm): 8.55–8.51 (m, 1H), 7.63–7.55 (m, 1H), 7.22–7.16 (m, 1H), 7.14–7.09 (m, 1H), 3.07–3.00 (m, 2H), 2.78–2.72 (m, 1H), 2.66–2.60 (m, 1H), 2.39–2.33 (m, 1H), 2.12 (t,  $J = 7.6$  Hz, 1H), 1.62–1.48 (m, 2H), 0.97–0.87 (m, 3H);  $^{13}\text{C}$  NMR (101 MHz,  $\text{CDCl}_3$ )  $\delta$  (ppm): 161.2, 161.1, 160.9, 149.3, 136.74, 136.68, 123.1, 123.0, 121.5, 121.4, 36.6, 34.7, 34.1, 34.0, 30.0, 28.0, 19.7, 19.2, 14.5, 14.0;

**HRMS** (ESI $^+$ ):  $m/z$   $[\text{M}+\text{Na}]^+$  calculated for  $\text{C}_{11}\text{H}_{16}\text{N}_2\text{NaO}^+$ : 215.1155, found 215.1158.

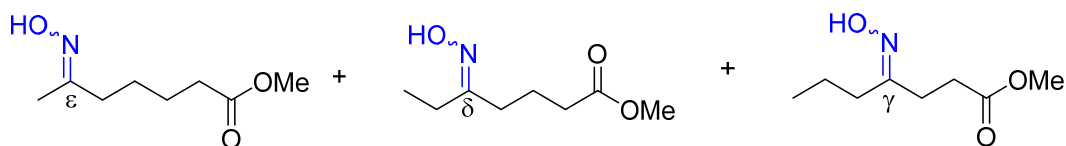

Methyl (*E/Z*)-6-(hydroxyimino)heptanoate (**44a- $\epsilon$ -oxime**), methyl (*E/Z*)-5-(hydroxyimino)heptanoate (**44a- $\delta$ -oxime**) and methyl (*E/Z*)-4-(hydroxyimino)heptanoate (**44a- $\gamma$ -oxime**) (**44a**) was synthesized by the general procedure A from methyl heptanoate (144.2 mg, 1 mmol) and purified by flash column chromatography on silica gel (gradient elution: Petroleum ether : EtOAc = 40:1 to 10:1 ) to afford a mixture of three regioisomers (*E/Z*)-**44a- $\epsilon$ -oxime**, (*E/Z*)-**44a- $\delta$ -oxime** and (*E/Z*)-**44a- $\gamma$ -oxime** as colorless oil (**109.2 mg, 63% yield,  $\gamma$ : $\delta$ : $\epsilon$  = 1:6.7:16.7,  $\gamma$ , *E/Z* = 1:1;  $\delta$ , *E/Z* = 1:1;  $\epsilon$ , *E/Z* = 3:1**). The regioisomer (*E/Z*)-**44a- $\epsilon$ -oxime** was isolated from the mixture in 40% yield (70 mg).

Site of oximation was assigned based on analysis of the  $^1\text{H}$  and  $^{13}\text{C}$  NMR spectra of the mixture products with the isolated (*E/Z*)-**44a- $\epsilon$ -oxime**. The *E/Z* isomers were confirmed by  $^1\text{H}$  and  $^{13}\text{C}$  NMR and the ratio of *E/Z* isomers were calculated by integration of  $^1\text{H}$  and  $^{13}\text{C}$  NMR spectra.

$^1\text{H}$  NMR (400 MHz,  $\text{CDCl}_3$ )  $\delta$  (ppm): 9.12 (brs, 1H), 3.63 (s, 3H), 2.59–2.49 (m, 0.4H), 2.38–2.26 (m, 3.1H), 2.23–2.14 (m, 1.6H), 1.84 and 1.82 (s, 2.8H), 1.66–1.57 (m, 1.4H), 1.55–1.47 (m, 1.6H), 1.05 (t,  $J$  = 7.6Hz, 0.8H);  $^{13}\text{C}$  NMR (101 MHz,  $\text{CDCl}_3$ )  $\delta$  (ppm): 174.12, 174.08, 173.87, 173.85, 173.49(2C), 161.9, 161.8, 159.9, 159.8, 158.4, 158.1, 51.79, 51.65, 51.63, 51.60, 35.4, 33.9, 33.8, 33.4, 32.9, 30.3, 30.2, 29.9, 29.2, 28.2, 27.4, 26.9, 25.7, 25.3, 24.99, 24.92, 24.88, 24.4, 23.5, 21.5, 21.1, 20.9, 19.8, 19.6, 19.1, 14.3, 13.8, 13.4, 10.8, 10.1; HRMS (ESI $^{+}$ ):  $m/z$  calculated for  $\text{C}_8\text{H}_{15}\text{NNaO}_3^{+}$ : 196.0944. found 196.0946.

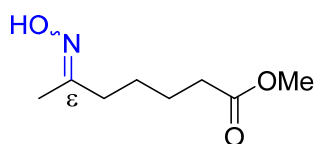

Methyl (*E/Z*)-6-(hydroxyimino)heptanoate (**44a- $\epsilon$ -oxime**):  $^1\text{H}$  NMR (400 MHz,  $\text{CDCl}_3$ )  $\delta$  (ppm): 9.23 (brs, 1H), 3.64 (s, 3H), 2.40–2.13 (m, 4H), 1.84 (brs, 3H), 1.68–1.47 (m, 4H);  $^{13}\text{C}$  NMR of (*E*)-**44a- $\epsilon$ -oxime** (101 MHz,  $\text{CDCl}_3$ )  $\delta$  (ppm): 174.1, 158.2, 51.6, 35.4, 33.8, 25.7, 24.4, 13.4;  $^{13}\text{C}$  NMR of (*Z*)-**44a- $\epsilon$ -oxime** (101 MHz,  $\text{CDCl}_3$ )  $\delta$  (ppm): 174.1, 158.5, 51.6, 35.4, 33.8, 28.2, 25.0, 24.9, 19.8.

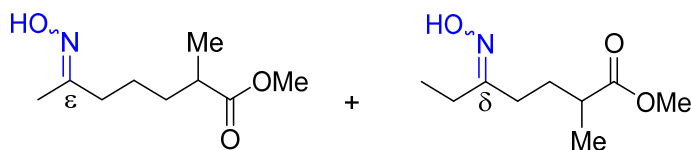

**Methyl (*E/Z*)-6-(hydroxyimino)-2-methylheptanoate (45a- $\epsilon$ -oxime) and methyl (*E/Z*)-5-(hydroxyimino)-2-methylheptanoate (45a- $\delta$ -oxime) (45a)** was synthesized by the general procedure A from methyl 2-methylheptanoate (158.2 mg, 1 mmol) and purified by flash column chromatography on silica gel (gradient elution: Petroleum ether : EtOAc = 40:1 to 10:1 ) to afford a mixture of two regioisomers (*E/Z*)-45a- $\epsilon$ -oxime and (*E/Z*)-45a- $\delta$ -oxime as colorless oil (**103.0 mg, 55% yield,  $\delta$ : $\epsilon$  = 1:2,  $\delta$ , *E/Z* = 1:1;  $\epsilon$ , *E/Z* = 3:1**).

*Site of oximation was assigned based on analysis of the  $^1\text{H}$  and  $^{13}\text{C}$  NMR spectra of the mixture products. The *E/Z* isomers were confirmed by  $^1\text{H}$  and  $^{13}\text{C}$  NMR and the ratio of *E/Z* isomers was calculated by integration of  $^{13}\text{C}$  NMR spectrum.*

**$^1\text{H}$  NMR** (400 MHz,  $\text{CDCl}_3$ )  $\delta$  (ppm): 8.92 (brs, 1H), 3.68–3.63 (m, 3H), 2.50–2.40 (m, 1H), 2.38–2.29 (m, 0.81H), 2.25–2.11 (m, 1.64H,  $\epsilon$ -45a), 1.85 (s, 1.16H,  $\epsilon$ -45a), 1.83 (s, 0.39H,  $\epsilon$ -45a), 1.71–1.58 (m, 1.17H), 1.54–1.35 (m, 2.75H), 1.20–1.11 (m, 3.38H), 1.09–1.03 (m, 0.91H);

**$^{13}\text{C}$  NMR** (101 MHz,  $\text{CDCl}_3$ )  $\delta$  (ppm): 177.21 ((*Z*)-45a- $\epsilon$ ), 177.17 ((*E*)-45a- $\epsilon$ ), 176.9 (2C, 45a- $\delta$ ), 162.1 (45a- $\delta$ ), 162.0 (45a- $\delta$ ), 158.5 ((*Z*)-45a- $\epsilon$ ), 158.2 ((*E*)-45a- $\epsilon$ ), 51.8, 51.72, 51.67, 39.6, 39.3, 39.0, 35.7, 33.7, 33.2, 31.4, 30.1, 29.4, 28.4, 27.5, 25.5, 24.0, 23.2, 21.0, 19.9, 17.17, 17.13, 13.4, 10.8, 10.2; **HRMS** (ESI<sup>+</sup>):  $m/z$   $[\text{M}+\text{Na}]^+$  calculated for  $\text{C}_9\text{H}_{17}\text{NNaO}_3^+$ : 210.1101. found 210.1113.

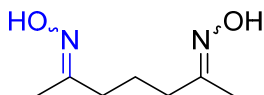

**(*EE/ZE/ZZ*)-Heptane-2,6-dione dioxime (46a)** was synthesized by the general procedure A from (*E/Z*)-heptan-2-one oxime (129.2 mg, 1 mmol, *E/Z* = 2:1) and purified by flash column chromatography on silica gel (gradient elution: Petroleum ether : EtOAc = 20:1 to 5:1 ) to afford the product (*EE/ZE/ZZ*)-46a isomer as colorless oil (**49.1 mg, 31% yield, *EE/ZE/ZZ* = 3.6:1.2:1** ), and remaining starting material (85.4 mg, 66%).

*The *E/Z* isomers were confirmed by  $^1\text{H}$  and  $^{13}\text{C}$  NMR, and the ratio of *E/Z* isomers was calculated by integration of  $^{13}\text{C}$  NMR spectrum based on more product formed belong to thermodynamic stability of *E*-product.*

**$^1\text{H}$  NMR** (400 MHz,  $\text{CDCl}_3$ )  $\delta$  (ppm): 9.12 (brs, 2H), 2.44–2.33 (m, 1.29H), 2.26–2.17 (m, 3.09H), 1.90–1.85 (m, 6.0H), 1.79–1.68 (m, 2.03H);

$^{13}\text{C}$  NMR (101 MHz,  $\text{CDCl}_3$ )  $\delta$  (ppm): 158.4, 158.13, 158.05, 35.8, 35.2, 29.8, 28.3, 22.8, 22.2, 20.0, 13.6;

HRMS (ESI<sup>+</sup>):  $m/z$  calculated for  $\text{C}_7\text{H}_{14}\text{N}_2\text{NaO}_2^+$ : 181.0947. found 181.0952.

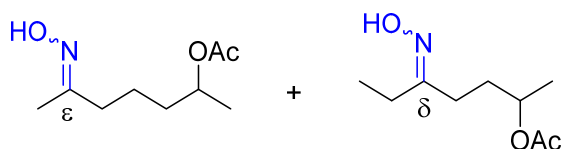

**(*E/Z*)-6-(Hydroxyimino)heptan-2-yl acetate (47a- $\epsilon$ -oxime) and (*E/Z*)-5-(hydroxyimino)heptan-2-yl acetate (47a- $\delta$ -oxime) and (47a)** was synthesized by the general procedure A from heptan-2-yl acetate (158.2 mg, 1 mmol) and purified by flash column chromatography on silica gel (gradient elution: Petroleum ether : EtOAc = 40:1 to 10:1 ) to afford a mixture of two regioisomers (*E/Z*)-47a- $\epsilon$ -oxime and (*E/Z*)-47a- $\delta$ -oxime as colorless oil (**88.0 mg, 47% yield,  $\delta$ : $\epsilon$  = 1:3,  $\delta$ , *E/Z* = 1:1;  $\epsilon$ , *E/Z* = 3:1**).

Site of oximation was assigned based on analysis of the  $^1\text{H}$  and  $^{13}\text{C}$  NMR spectra of the mixture products. The *E/Z* isomers were confirmed by  $^1\text{H}$  and  $^{13}\text{C}$  NMR spectra and the ratio of *E/Z* isomers was calculated by integration of  $^1\text{H}$  and  $^{13}\text{C}$  NMR spectra.

$^1\text{H}$  NMR (400 MHz,  $\text{CDCl}_3$ )  $\delta$  (ppm): 4.92–4.84 (m, 1H), 2.41–2.30 (m, 1H), 2.23–2.14 (m, 1.53H, **47a- $\epsilon$** ) 2.00 (s, 3.2H), 1.85 and 1.83 (s, 2.1H, **47a- $\epsilon$** ) 1.78–1.40 (m, 4.07H), 1.23–1.16 (m, 3.70H), 1.06 (t,  $J$  = 7.6 Hz, 0.71H, **47a- $\delta$** );

$^{13}\text{C}$  NMR (101 MHz,  $\text{CDCl}_3$ )  $\delta$  (ppm): 171.0(4C), 162.0 (**47a- $\delta$** ), 161.8 (**47a- $\delta$** ), 158.4 ((*Z*)-**47a- $\epsilon$** ), 158.1((*E*)-**47a- $\epsilon$** ), 70.9, 70.7, 70.6, 35.8, 35.6, 35.4, 32.3, 31.6, 29.7, 29.4, 28.4, 27.5, 25.0, 24.8, 23.8, 22.2, 21.5, 21.40, 21.37, 21.04, 20.01, 19.96, 19.85, 19.83, 13.5, 10.8, 10.1;

HRMS (ESI<sup>+</sup>):  $m/z$  [ $\text{M}+\text{Na}$ ]<sup>+</sup> calculated for  $\text{C}_9\text{H}_{17}\text{NNaO}_3^+$ : 210.1101, found 210.1107.

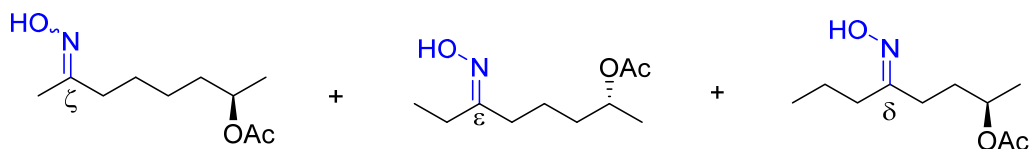

**(*R,E/Z*)-7-(Hydroxyimino)octan-2-yl acetate (48a- $\zeta$ -oxime), (*R,E/Z*)-6-(hydroxyimino)octan-2-yl acetate (48a- $\epsilon$ -oxime) and (*R,E/Z*)-5-(hydroxyimino)octan-2-yl acetate (48a- $\delta$ -oxime) (48a)** was synthesized by the general procedure A from (*R*)-octan-2-yl acetate (172.3 mg, 1 mmol) and purified by flash column chromatography on silica gel (gradient elution: Petroleum ether :

EtOAc = 40:1 to 10:1 ) to afford a mixture of three regioisomers (*E/Z*)-**48a-ζ-oxime**, (*E/Z*)-**48a-ε-oxime**, and (*E/Z*)-**48a-δ-oxime** as colorless oil (106.7 mg, 53% yield, δ:ε:ζ = 1:1.8:5, δ, *E/Z* = 1:1; ε, *E/Z* = 1:1; ζ, *E/Z* = 3:1).

Site of oximation was assigned based on analysis of the  $^1\text{H}$  and  $^{13}\text{C}$  NMR spectra of the mixture products. The *E/Z* isomers were confirmed by  $^1\text{H}$  and  $^{13}\text{C}$  NMR and the ratio of *E/Z* isomers was calculated by integration of  $^1\text{H}$  and  $^{13}\text{C}$  NMR spectra.

$^1\text{H}$  NMR (400 MHz,  $\text{CDCl}_3$ ) δ (ppm): 9.43 (brs, 1H), 4.89–4.75 (m, 1H), 2.33–2.21 (m, 0.77H), 2.16–2.05 (m, 1.18H), 1.98–1.92 (m, 3H), 1.79 and 1.77 (s, 1.31H), 1.56–1.37 (m, 3.29H), 1.27–1.16 (m, 3.16H), 1.15–1.08 (m, 2.95H), 1.00 (t,  $J = 7.6$  Hz, 0.52H), 0.90–0.80 (m, 0.66H), 0.80–0.76 (m, 0.47H);  $^{13}\text{C}$  NMR (101 MHz,  $\text{CDCl}_3$ ) δ (ppm): 170.87, 170.84, 170.82, 162.1(**48a-ε**), 161.9(**48a-ε**), 160.5 (**48a-δ**), 160.4 (**48a-δ**), 158.4 ((*Z*)-**48a-ζ**), 158.0 ((*E*)-**48a-ζ**), 71.1, 70.83, 70.81, 70.64, 70.61, 70.48, 36.0, 35.9, 35.8, 35.53, 35.50, 35.4, 33.3, 32.2, 31.9, 31.7, 31.5, 30.0, 29.6, 29.1, 28.4, 27.3, 27.15, 27.13, 26.0, 25.4, 25.3, 25.2, 24.8, 23.6, 22.5, 22.1, 21.5, 21.30, 21.28, 21.2, 20.8, 19.89, 19.86, 19.7, 19.6, 19.0, 14.3, 14.0, 13.7, 13.3, 10.7, 10.0;

HRMS (ESI<sup>+</sup>):  $m/z$   $[\text{M}+\text{Na}]^+$  calculated for  $\text{C}_{10}\text{H}_{19}\text{NNaO}_3^+$ : 224.1257, found 224.1255.

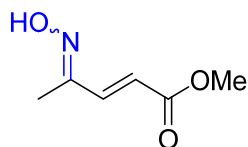

**Methyl (2*E*,4*E*/4*Z*)-4-(hydroxyimino)pent-2-enoate (49a)** was synthesized by the general procedure **B** from methyl (2*E*)-pent-2-enoate (114.1 mg, 1 mmol) and purified by flash column chromatography on silica gel (gradient elution: Petroleum ether : EtOAc = 20:1) to afford a mixture of *E/Z* isomers (**2*E*,4*E*/4*Z*)-49a** as a white solid (101.2 mg, 71% yield); and no epoxide was obtained from the reaction.

The *E/Z* isomerism is with respect to the  $\text{C}=\text{N}$  bond. Ratio of (**2*E*,4*E*)/(**2*E*,4*Z*)** = 2:1;**

**Major (2*E*,4*E*)-49a:**

$^1\text{H}$  NMR (400 MHz,  $\text{CDCl}_3$ ) δ (ppm): 9.96 (brs, 1H), 7.32 (d,  $J = 16.0$  Hz, 1H), 6.18 (d,  $J = 16.0$  Hz, 1H), 3.76 (s, 3H), 2.01 (s, 3H);  $^{13}\text{C}$  NMR (101 MHz,  $\text{CDCl}_3$ ) δ (ppm): 167.0, 155.3, 141.8, 122.5, 52.1, 9.8.

**Minor (2*E*,4*Z*)-49a:**

**<sup>1</sup>H NMR** (400 MHz, CDCl<sub>3</sub>) δ (ppm): 9.96 (brs, 1H), 7.97 (d, *J* = 16.4 Hz, 1H), 6.20 (d, *J* = 16.4 Hz, 1H), 3.78 (s, 3H), 2.03 (s, 3H); **<sup>13</sup>C NMR** (101 MHz, CDCl<sub>3</sub>) δ (ppm): 167.0, 151.5, 131.3, 125.3, 52.2, 16.7.

**HRMS (ESI):** *m/z* [M+Na]<sup>+</sup> calcd for C<sub>6</sub>H<sub>9</sub>NNaO<sub>3</sub><sup>+</sup>: 166.0475; found: 166.0474.

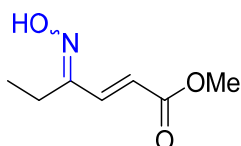

**Methyl (2*E*,4*E*/4*Z*) 4-(hydroxyimino)hex-2-enoate (50a)** was synthesized by the general procedure **B** from methyl (*E*)-hex-2-enoate (128.2 mg, 1 mmol). After completion of the reaction, extraction with DCM and removal of the solvent DCM afforded a mixture of *E/Z* isomers (**2*E*,4*E*/4*Z*)-50a** as a white solid (**130.5 mg, 83% yield**); the product needs no further purification and was taken directly for NMR and HRMS analysis. No epoxide was obtained from the reaction. *The E/Z isomerism is with respect to C=N bond. Ratio of (2*E*,4*E*)/(2*E*,4*Z*) = 2:1;*

**Major (2*E*,4*E*)-50a:**

**<sup>1</sup>H NMR** (400 MHz, CDCl<sub>3</sub>) δ (ppm): 9.28 (brs, 1H), 7.20 (d, *J* = 16.4 Hz, 1H), 6.15 (d, *J* = 16.0 Hz, 1H), 3.72 (s, 3H), 2.48 (q, *J* = 7.6 Hz, 2H), 1.03 (t, *J* = 7.6 Hz, 3H); **<sup>13</sup>C NMR** (101 MHz, CDCl<sub>3</sub>) δ (ppm): 167.1, 159.9, 140.9, 122.1, 52.0, 17.7, 10.6.

**Minor (2*E*,4*Z*)-50a:**

**<sup>1</sup>H NMR** (400 MHz, CDCl<sub>3</sub>) δ (ppm): 9.28 (brs, 1H), 7.84 (d, *J* = 16.8 Hz, 1H), 6.19 (d, *J* = 16.0 Hz, 1H), 3.73 (s, 3H), 2.39 (q, *J* = 7.6 Hz, 2H), 1.08 (t, *J* = 7.6 Hz, 3H); **<sup>13</sup>C NMR** (101 MHz, CDCl<sub>3</sub>) δ (ppm): 167.1, 155.3, 130.8, 124.8, 52.2, 24.3, 11.5.

**HRMS (ESI):** *m/z* [M+Na]<sup>+</sup> calcd for C<sub>7</sub>H<sub>11</sub>NNaO<sub>3</sub><sup>+</sup>: 180.0631; found: 180.0625.

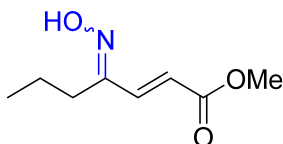

**Methyl (2*E*,4*E*/4*Z*)-4-(hydroxyimino)hept-2-enoate (51a)** was synthesized by the general procedure **B** from methyl (*E*)-hept-2-enoate (142.2 mg, 1 mmol) and purified by flash column chromatography on silica gel (gradient elution: Petroleum ether : EtOAc = 20:1) to afford the product (**2*E*,4*E*/4*Z*)-51a** as a mixture of *E/Z* isomers. Epoxide was also obtained from the reaction. *The E/Z isomerism is with respect to C=N bond. Ratio of (2*E*,4*E*)/(2*E*,4*Z*) = 2:1;*

**51a:** 109.6 mg, 64% yield, white solid; **rsm:** 11.4 mg, 8%; **epoxide:** 12.6 mg, 8% yield;

**Major (2*E*,4*E*)-isomer:**  $^1\text{H}$  NMR (400 MHz,  $\text{CDCl}_3$ )  $\delta$  (ppm): 8.87 (brs, 1H), 7.25 (d,  $J = 16.4$  Hz, 1H), 6.18 (d,  $J = 16.4$  Hz, 1H), 3.76 (s, 3H), 2.49 (t,  $J = 7.6$  Hz, 2H), 1.60–1.47 (m, 2H), 2.49 (t,  $J = 8.0$  Hz, 3H);  $^{13}\text{C}$  NMR (101 MHz,  $\text{CDCl}_3$ )  $\delta$  (ppm): 167.1, 158.7, 141.3, 122.2, 52.0, 26.2, 19.7, 14.3.

**Minor (2*E*,4*Z*)-isomer:**  $^1\text{H}$  NMR (400 MHz,  $\text{CDCl}_3$ )  $\delta$  (ppm): 8.87 (brs, 1H), 7.88 (d,  $J = 16.4$  Hz, 1H), 6.23 (d,  $J = 16.8$  Hz, 1H), 3.77 (s, 3H), 2.37 (t,  $J = 7.6$  Hz, 2H), 1.60–1.47 (m, 2H), 2.49 (t,  $J = 8.0$  Hz, 3H);  $^{13}\text{C}$  NMR (101 MHz,  $\text{CDCl}_3$ )  $\delta$  (ppm): 167.1, 154.3, 130.9, 124.9, 52.2, 32.8, 20.6, 13.8.

**HRMS (ESI):**  $m/z$   $[\text{M}+\text{H}]^+$  calcd for  $\text{C}_8\text{H}_{13}\text{NNaO}_3^+$ : 194.0788; found: 194.0793.

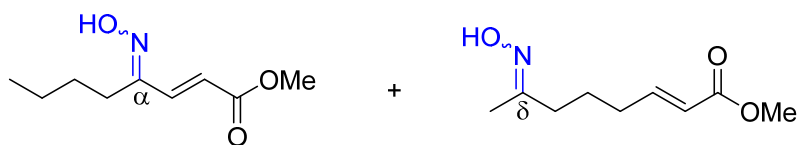

**Methyl (2*E*,4*E*/4*Z*)-4-(hydroxyimino)oct-2-enoate (52a- $\alpha$ -oxime) and methyl (2*E*,7*E*/7*Z*)-7-(hydroxyimino)oct-2-enoate (52a- $\delta$ -oxime) (52a)** were synthesized by the general Procedure **B** from methyl (*E*)-oct-2-enoate (156.2 mg, 1 mmol) and purified by flash column chromatography on silica gel (gradient elution: Petroleum ether : EtOAc = 20:1 to 5:1) to afford isolated (2*E*,4*E*/4*Z*)-52a- $\alpha$ -oxime as an *E/Z* mixture, and isolated (2*E*,7*E*/7*Z*)-52a- $\delta$ -oxime as an *E/Z* mixture with small amount of other regioisomers. No epoxide was obtained from the reaction.

The *E/Z* isomerism is with respect to the  $\text{C}=\text{N}$  bond. Ratio of (2*E*,4*E*)/(2*E*,4*Z*) = 2:1;

(2*E*,4*E*/4*Z*)-52a- $\alpha$ -oxime, 103.7 mg, 56% yield, colorless oil; (2*E*,7*E*/7*Z*)-52a- $\delta$ -oxim, 10% yield; **rsm:** 6%;

(2*E*,4*E*/4*Z*)-52a- $\alpha$ -oxime isomer:

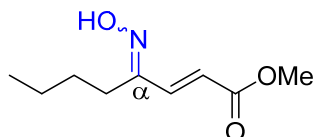

**Major (2*E*,4*E*)-isomer:**  $^1\text{H}$  NMR (400 MHz,  $\text{CDCl}_3$ )  $\delta$  (ppm): 9.80 (brs, 1H), 7.26 (d,  $J = 16.0$  Hz, 1H), 6.20 (d,  $J = 16.4$  Hz, 1H), 3.78 (s, 3H), 2.53 (t,  $J = 7.6$  Hz, 2H), 1.56–1.43 (m, 2H),



1.41–1.29 (m, 2H), 0.91 (t,  $J = 7.2$  Hz, 3H);  $^{13}\text{C}$  NMR (101 MHz,  $\text{CDCl}_3$ )  $\delta$  (ppm): 167.0, 159.1, 141.3, 122.3, 52.1, 28.4, 24.1, 23.0, 13.9.

**Minor (2*E*,4*Z*)-isomer:**  $^1\text{H}$  NMR (400 MHz,  $\text{CDCl}_3$ )  $\delta$  (ppm): 9.80 (brs, 1H), 7.89 (d,  $J = 16.4$  Hz, 1H), 6.25 (d,  $J = 16.8$  Hz, 1H), 3.79 (s, 3H), 2.41 (t,  $J = 7.8$  Hz, 2H), 1.56–1.43 (m, 2H), 1.41–1.29 (m, 2H), 0.90 (t,  $J = 7.2$  Hz, 3H);  $^{13}\text{C}$  NMR (101 MHz,  $\text{CDCl}_3$ )  $\delta$  (ppm): 167.0, 154.7, 130.9, 125.0, 52.2, 30.7, 29.4, 22.5, 13.8.

**HRMS (ESI):**  $m/z$   $[\text{M}+\text{Na}]^+$  calcd for  $\text{C}_9\text{H}_{15}\text{NNaO}_3^+$ : 208.0944; found: 208.0938.

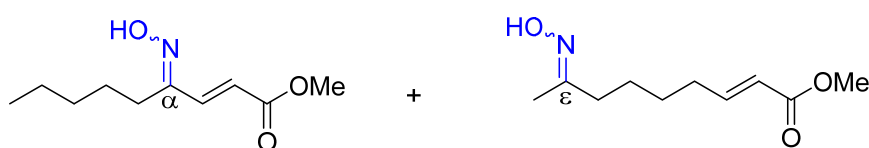

**Methyl (2*E*,4*E*/4*Z*)-4-(hydroxyimino)non-2-enoate (53a- $\alpha$ -oxime) and methyl (2*E*,8*E*/8*Z*)-8-(hydroxyimino)non-2-enoate (53a- $\epsilon$ -oxime) (53a)** was synthesized by the general Procedure **B** from methyl (*E*)-non-2-enoate (170.3 mg, 1 mmol) and purified by flash column chromatography on silica gel (gradient elution: Petroleum ether : EtOAc = 20:1 to 5:1) to afford isolated (2*E*,4*E*/4*Z*)-53a- $\alpha$ -oxime as an *E*/*Z* mixture, and (2*E*,8*E*/8*Z*)-53a- $\epsilon$ -oxime as an *E*/*Z* mixture. No epoxide was obtained from the reaction.

The *E*/*Z* isomerism is with respect to  $\text{C}=\text{N}$  bond. Ratio of (2*E*,4*E*)/(2*E*,4*Z*) = 2:1, (2*E*,8*E*)/(2*E*,8*Z*) = 8.3:1;

(2*E*,4*E*/4*Z*)-53a- $\alpha$ -oxime, 111.6 mg, 56% yield, colorless oil; (2*E*,8*E*/8*Z*)-53a- $\epsilon$ -oxime, 35.9 mg, 18% yield, colorless oil;

**(2*E*,4*E*/4*Z*)-53a- $\alpha$ -oxime isomer:**

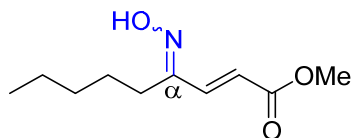

**Major (2*E*,4*E*)-isomer:**  $^1\text{H}$  NMR (400 MHz,  $\text{CDCl}_3$ )  $\delta$  (ppm): 9.43 (brs, 1H), 7.25 (d,  $J = 16.4$  Hz, 1H), 6.18 (d,  $J = 16.4$  Hz, 1H), 3.77 (s, 3H), 2.51 (t,  $J = 7.6$  Hz, 2H), 1.55–1.46 (m, 2H), 1.33–1.28 (m, 4H), 0.86 (t,  $J = 6.6$  Hz, 3H);  $^{13}\text{C}$  NMR (101 MHz,  $\text{CDCl}_3$ )  $\delta$  (ppm): 167.0, 159.0, 141.3, 122.2, 52.0, 32.0, 25.9, 24.3, 22.5, 14.0

**Minor (2E,4Z)-isomer:**  $^1\text{H}$  NMR (400 MHz,  $\text{CDCl}_3$ )  $\delta$  (ppm): 9.43 (brs, 1H), 7.88 (d,  $J = 16.8$  Hz, 1H), 6.24 (d,  $J = 16.8$  Hz, 1H), 3.78 (s, 3H), 2.39 (t,  $J = 7.6$  Hz, 2H), 1.55–1.46 (m, 2H), 1.33–1.28 (m, 4H), 0.86 (t,  $J = 6.6$  Hz, 3H);  $^{13}\text{C}$  NMR (101 MHz,  $\text{CDCl}_3$ )  $\delta$  (ppm): 167.0, 154.7, 130.9, 125.0, 52.2, 31.5, 30.9, 27.0, 22.4, 14.0.

**HRMS (ESI):**  $m/z$   $[\text{M}+\text{Na}]^+$  calcd for  $\text{C}_{10}\text{H}_{17}\text{NNaO}_3^+$ : 222.1101; found: 222.1097.

**(2E,8E/8Z)-53a- $\epsilon$ -oxime isomer:**

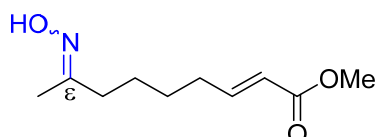

$^1\text{H}$  NMR (400 MHz,  $\text{CDCl}_3$ )  $\delta$  (ppm): 9.05 (brs, 1H), 7.95–7.88 (m, 0.16H, (2E,8Z)), 7.31–7.25 (m, 1.32H), 6.27–6.21 (m, 1.10H, (2E,8E)), 3.80 (s, 0.37H, (2E,8Z)), 3.79 (s, 3H, (2E,8E)), 2.60–2.54 (m, 1.92H), 2.47–2.42 (m, 0.83H), 2.29–2.25 (m, 1.81H), 1.90 (s, 2.68H, (2E,8E)), 1.89 (s, 0.32H, (2E,8Z)), 1.81–1.71 (m, 2.21H), 1.26–1.90 (m, 1.32H);

$^{13}\text{C}$  NMR (101 MHz,  $\text{CDCl}_3$ )  $\delta$  (ppm): 167.1, 158.2, 141.2, 122.3, 52.1, 35.6, 23.6, 22.7, 19.9, 13.7;

**HRMS (ESI):**  $m/z$   $[\text{M}+\text{Na}]^+$  calcd for  $\text{C}_{10}\text{H}_{17}\text{NNaO}_3^+$ : 222.1101; found: 222.1099.

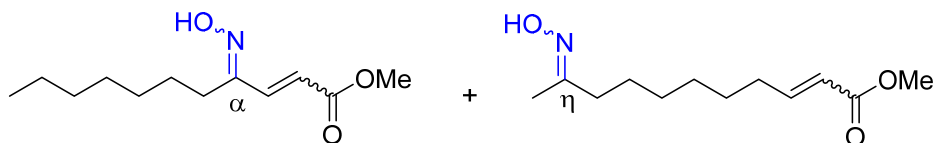

**Mmethyl 4-(hydroxyimino)undec-2-enoate (54a- $\alpha$ -oxime) and methyl-10-(hydroxyimino)undec-2-enoate (54a- $\eta$ -oxime) (54a)** was synthesized by the general procedure **B** from methyl (2E/2Z)-undec-2-enoate (198.3 mg, 1 mmol, 2E/2Z = 3:1) and purified by flash column chromatography on silica gel (gradient elution: Petroleum ether : EtOAc = 20:1 to 5:1) to afford isolated (2E/2Z, 4E/4Z)-**54a- $\alpha$ -oxime** as an *E/Z* mixture, and isolated (2E/2Z,10E/10Z)-**54a- $\eta$ -oxime** with small amount of other site regioisomers. No epoxide was obtained from the reaction.,

The 2E/2Z isomerism is with respect to C=C bond, ratio of 2E/2Z=[(2E,4E) + (2E,4Z)]/[(2Z,4E) + (2Z,4Z)] = 3:1; the 4E/4Z isomerism is with respect to C=N bond, ratio of 4E/4Z=[(2E,4E) + (2Z,4E)]/[(2E,4Z) + (2Z,4Z)] = 2:1;

(2*E*/2*Z*, 4*E*/4*Z*)-**54a-α-oxime**: 111.4 mg, 49% yield, colorless oil; (2*E*/2*Z*,10*E*/10*Z*)-**54a-η-oxime**: 25% yield colorless oil (containing small amount of other site regioisomers);

(2*E*/2*Z*, 4*E*/4*Z*)-**54a-α-oxime** isomer:

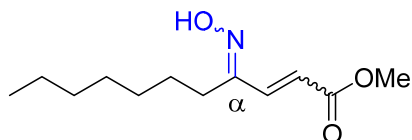

<sup>1</sup>H NMR (400 MHz, CDCl<sub>3</sub>) δ (ppm): 9.75 (brs, 0.78H), 7.91–7.86 (m, 0.3H, (2*E*,4*Z*)+(2*Z*,4*Z*)), 7.28–7.23 (m, 0.64H, (2*E*,4*E*)+(2*Z*,4*E*)), 6.27–6.16 (m, 1H), 3.79 (s, 0.64H, (2*E*,4*Z*)+(2*Z*,4*Z*)) 3.78(s, 1.91H, (2*E*,4*E*)+(2*Z*,4*E*)), 2.52 (t, *J* = 8.0 Hz, 1.29H, (2*E*,4*E*)+(2*Z*,4*E*)), 2.40 (t, *J* = 7.6 Hz, 0.65H, (2*E*,4*Z*)+(2*Z*,4*Z*)), 1.57–1.45 (m, 2.16H), 1.37–1.24 (m, 8.30H), 0.86 (t, *J* = 6.8 Hz, 3.12H); <sup>13</sup>C NMR (101 MHz, CDCl<sub>3</sub>) δ (ppm): 167.0 ((2*E*,4*E*)+(2*E*,4*Z*)), 166.6 ((2*Z*,4*E*)+(2*Z*,4*Z*)), 159.14 (2*Z*, 4*E*), 159.08 (2*E*, 4*E*), 154.8 (2*Z*, 4*Z*), 154.7 (2*E*, 4*Z*), 141.3 (2*E*, 4*E*), 141.0 (2*Z*, 4*E*), 130.9 (2*E*,4*Z*), 130.6 (2*Z*,4*Z*), 125.5 (2*Z*, 4*Z*), 125.0 (2*E*, 4*Z*), 122.8 (2*Z*, 4*E*), 122.3 (2*E*, 4*E*), 61.2 (2*Z*, 4*Z*), 61.0 (2*Z*, 4*E*), 52.2 (2*E*, 4*Z*), 52.0 (2*E*, 4*E*), 31.8, 31.0, 29.9, 29.4, 29.11, 29.06, 27.3, 26.3, 24.4, 22.7, 14.3, 14.2.

**HRMS (ESI):** *m/z* [M+Na]<sup>+</sup> calcd for C<sub>12</sub>H<sub>21</sub>NNaO<sub>3</sub><sup>+</sup>: 250.1414; found: 250.1408.

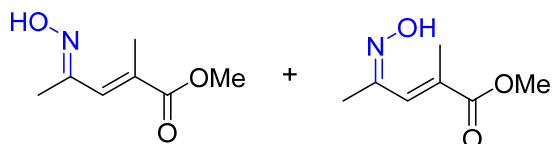

**Methyl (2*E*,4*E*)-4-(hydroxyimino)-2-methylpent-2-enoate** and **methyl (2*E*,4*Z*)-4-(hydroxyimino)-2-methylpent-2-enoate (**55a**)** was synthesized by the general procedure **B** from methyl (*E*)-pent-2-enoate (128.2 mg, 1 mmol) and purified by flash column chromatography on silica gel (gradient elution: Petroleum ether : EtOAc = 40:1) to afford (2*E*,4*E*)-**55a** and (2*E*,4*Z*)-**55a** as two separated single isomers. Epoxide was also obtained from the reaction.

(2*E*,4*E*)-**55a** isomer:

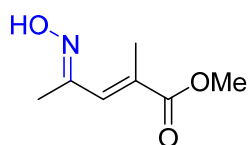

(2*E*,4*E*)-**55a**: 36.2 mg, 23%, white solid; <sup>1</sup>H NMR (400 MHz, CDCl<sub>3</sub>) δ (ppm): 9.15 (brs, 1H), 7.00 (s, 1H), 3.78 (s, 3H), 2.09 (s, 3H), 2.07 (s, 3H); <sup>13</sup>C NMR (101 MHz, CDCl<sub>3</sub>) δ (ppm): 168.7, 154.8, 134.2, 132.0, 52.4, 14.90, 14.86; HRMS (ESI): *m/z* [M+Na]<sup>+</sup> calcd for C<sub>7</sub>H<sub>11</sub>NNaO<sub>3</sub><sup>+</sup>: 180.0631; found: 180.0628.

(2*E*,4*Z*)-**55a** isomer:

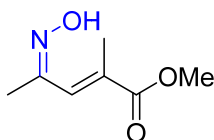

(2*E*,4*Z*)-**55a**: 20.5 mg, 13% yield, white solid; <sup>1</sup>H NMR (400 MHz, CDCl<sub>3</sub>) δ (ppm): 8.57 (brs, 1H), 7.20 (s, 1H), 3.78 (s, 3H), 2.05 (s, 3H), 1.94 (s, 3H); <sup>13</sup>C NMR (101 MHz, CDCl<sub>3</sub>) δ (ppm): 168.0, 152.9, 132.8, 130.4, 52.4, 19.9, 15.3; HRMS (ESI): *m/z* [M+Na]<sup>+</sup> calcd for C<sub>7</sub>H<sub>11</sub>NNaO<sub>3</sub><sup>+</sup>: 180.0631; found: 180.0629.

**Methyl 3-ethyl-2-methyloxirane-2-carboxylate (55b):**

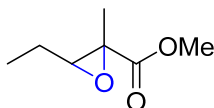

**55b**: 28.8mg, 20% yield, colorless oil; <sup>1</sup>H NMR (400 MHz, CDCl<sub>3</sub>) δ (ppm): 3.75 (s, 3H), 3.14 (t, *J* = 6.4 Hz, 1H), 1.66–1.58 (m, 2H), 1.52 (s, 3H), 1.06 (t, *J* = 7.6 Hz, 3H); <sup>13</sup>C NMR (101 MHz, CDCl<sub>3</sub>) δ (ppm): 174.7, 63.6, 57.8, 52.7, 21.6, 13.5, 10.4; HRMS (ESI): *m/z* [M+Na]<sup>+</sup> calcd for C<sub>7</sub>H<sub>12</sub>NaO<sub>3</sub><sup>+</sup>: 167.0679; found: 167.0684.

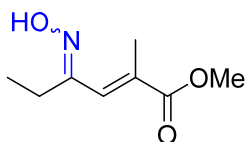

**Methyl (2*E*,4*E*/4*Z*)-4-(hydroxyimino)-2-methylhex-2-enoate (56a)** was synthesized by the general procedure **B** from methyl (*E*)-2-methylhex-2-enoate (142.2 mg, 1 mmol) and purified by flash column chromatography on silica gel (gradient elution: Petroleum ether : EtOAc = 40:1) to afford isolated product (2*E*,4*E*/4*Z*)-**56a** as an *E/Z* mixture. Epoxide was also obtained from the reaction.

The *E/Z* isomerism is with respect to C=N bond. Ratio of (2*E*,4*E*)/(2*E*,4*Z*) = 2:1;

**56a**: 60.2 mg, 35% yield, white solid; **rsm**: <5%;

**Major (2*E*,4*E*)-isomer:**  $^1\text{H}$  NMR (400 MHz,  $\text{CDCl}_3$ )  $\delta$  (ppm): 8.88 (brs, 1H), 6.97 (s, 1H), 3.78 (s, 3H), 2.51 (q,  $J = 7.6$  Hz, 2H), 2.07 (s, 3H), 1.10 (t,  $J = 4.0$  Hz, 3H);  $^{13}\text{C}$  NMR (101 MHz,  $\text{CDCl}_3$ )  $\delta$  (ppm): 168.6, 159.3, 132.8, 130.5, 52.4, 21.9, 14.8, 10.3.

**Minor (2*E*,4*Z*)-isomer:**  $^1\text{H}$  NMR (400 MHz,  $\text{CDCl}_3$ )  $\delta$  (ppm): 8.88 (brs, 1H), 7.03 (s, 1H), 3.78 (s, 3H), 2.36 (q,  $J = 7.6$  Hz, 2H), 1.88 (s, 3H), 1.09 (t,  $J = 4.0$  Hz, 3H);  $^{13}\text{C}$  NMR (101 MHz,  $\text{CDCl}_3$ )  $\delta$  (ppm): 167.8, 157.1, 133.2, 132.7, 52.4, 27.4, 15.5, 11.1.

**HRMS (ESI):**  $m/z$   $[\text{M}+\text{H}]^+$  calcd for  $\text{C}_8\text{H}_{13}\text{NNaO}_3^+$ : 194.0788; found: 194.0789.

**Methyl 2-methyl-3-propyloxirane-2-carboxylate (56b):**

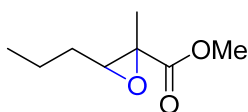

**56b:** 45.9 mg, 29% yield, colorless oil;  $^1\text{H}$  NMR (400 MHz,  $\text{CDCl}_3$ )  $\delta$  (ppm): 3.71 (s, 3H), 3.14 (t,  $J = 6.0$  Hz, 1H), 1.58–1.47 (m, 4H), 1.48 (s, 3H), 0.95 (t,  $J = 7.2$  Hz, 3H);  $^{13}\text{C}$  NMR (101 MHz,  $\text{CDCl}_3$ )  $\delta$  (ppm): 172.2, 62.4, 57.5, 52.6, 30.0, 19.7, 13.9, 13.6; **HRMS (ESI):**  $m/z$   $[\text{M}+\text{Na}]^+$  calcd for  $\text{C}_8\text{H}_{14}\text{NaO}_3^+$ : 181.0835; found: 181.0834.

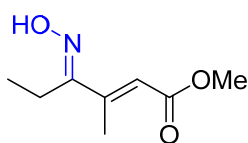

**Methyl (2*E*,4*E*)-4-(hydroxyimino)-3-methylhex-2-enoate (57a)** was synthesized by the general procedure **B** from methyl (*E*)-3-methylhex-2-enoate (142.2 mg, 1 mmol) and purified by flash column chromatography on silica gel (gradient elution: Petroleum ether : EtOAc = 40:1) to afford the product (2*E*,4*E*)-**57a** as a single *E*-isomer. No epoxide was obtained from the reaction.

**57a:** 82.2 mg, 48% yield, white solid; **rsm:** 21.1 mg, 15%;

$^1\text{H}$  NMR (400 MHz,  $\text{CDCl}_3$ )  $\delta$  (ppm): 9.19 (brs, 1H), 6.14 (s, 1H), 3.75 (s, 3H), 2.59 (q,  $J = 7.6$  Hz, 2H), 2.33 (s, 3H), 1.09 (t,  $J = 7.6$  Hz, 3H);

$^{13}\text{C}$  NMR (101 MHz,  $\text{CDCl}_3$ )  $\delta$  (ppm): 167.2, 162.1, 149.8, 119.2, 51.5, 18.0, 14.4, 11.1;

**HRMS (ESI):**  $m/z$   $[\text{M}+\text{H}]^+$  calcd for  $\text{C}_8\text{H}_{14}\text{NO}_3^+$ : 172.0968; found: 172.0960.

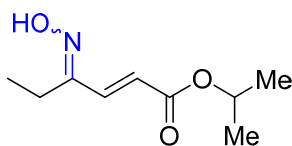

**Isopropyl (2*E*,4*E*/4*Z*)-4-(hydroxyimino)hex-2-enoate (58a)** was synthesized by the general procedure **B** from methyl isopropyl (*E*)-hex-2-enoate (156.2 mg, 1 mmol) and purified by flash column chromatography on silica gel (gradient elution: Petroleum ether : EtOAc = 20:1) to afford the product (2*E*,4*E*/4*Z*)-**58a** as a mixture of *E*/*Z* isomers. No epoxide was obtained from the reaction.

*The E/Z isomerism is with respect to C=N bond. Ratio of (2E,4E)/(2E,4Z) = 7:3;*

**58a:** 124.1 mg, 67% yield, white solid; **rsm:** <5%;

**Major (2*E*,4*E*)-isomer:** <sup>1</sup>H NMR (400 MHz, CDCl<sub>3</sub>) δ (ppm): 9.97 (brs, 1H), 7.22 (d, *J* = 16.4 Hz, 1H), 6.18 (d, *J* = 16.0 Hz, 1H), 5.14–5.03 (m, 1H), 2.54 (q, *J* = 7.6 Hz, 2H), 1.26 (d, *J* = 6.4 Hz, 6H), 1.09 (t, *J* = 7.6 Hz, 3H); <sup>13</sup>C NMR (101 MHz, CDCl<sub>3</sub>) δ (ppm): 166.2, 160.0, 140.3, 123.2, 68.5, 21.9, 17.7, 10.7.

**Minor (2*E*,4*Z*)-isomer:** <sup>1</sup>H NMR (400 MHz, CDCl<sub>3</sub>) δ (ppm): 9.97 (brs, 1H), 7.86 (d, *J* = 16.4 Hz, 1H), 6.22 (d, *J* = 16.4 Hz, 1H), 5.14–5.03 (m, 1H), 2.44 (q, *J* = 7.6 Hz, 2H), 1.27 (d, *J* = 6.4 Hz, 6H), 1.14 (t, *J* = 7.6 Hz, 3H); <sup>13</sup>C NMR (101 MHz, CDCl<sub>3</sub>) δ (ppm): 166.2, 155.4, 130.2, 125.9, 68.7, 24.3, 21.9, 11.6.

**HRMS (ESI):** *m/z* [M+Na]<sup>+</sup> calcd for C<sub>9</sub>H<sub>15</sub>NNaO<sub>3</sub><sup>+</sup>: 208.0944; found: 208.0940.

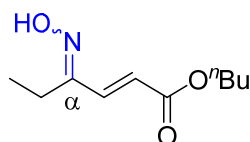

**Butyl (2*E*,4*E*/4*Z*)-4-(hydroxyimino)hex-2-enoate (59a)** was synthesized by the general procedure **B** from butyl (*E*)-hex-2-enoate (170.3 mg, 1 mmol) and purified by flash column chromatography on silica gel (gradient elution: Petroleum ether : EtOAc = 20:1) to afford the product (2*E*,4*E*/4*Z*)-**59a** as a mixture of *E*/*Z* isomers. No epoxide was obtained from the reaction.

*The E/Z isomerism is with respect to C=N bond. Ratio of (2E,4E)/(2E,4Z) = 7:3.*

**59a:** 133.5 mg, 67% yield, colorless oil; **rsm:** <5%;

**Major (2*E*,4*E*)-isomer:** <sup>1</sup>H NMR (400 MHz, CDCl<sub>3</sub>) δ (ppm): 9.89 (brs, 1H), 7.26 (d, *J* = 16.0 Hz, 1H), 6.23 (d, *J* = 16.0 Hz, 1H), 4.23–4.18 (m, 2H), 2.57 (q, *J* = 7.6 Hz, 2H), 1.72–1.64 (m, 2H), 1.47–1.37 (m, 2H), 1.12 (t, *J* = 7.6 Hz, 3H), 0.95 (t, *J* = 7.6 Hz, 3H); <sup>13</sup>C NMR (101 MHz, CDCl<sub>3</sub>) δ (ppm): 166.7, 160.1, 140.5, 122.7, 64.9, 30.8, 19.2, 13.8, 10.7.

**Minor (2*E*,4*Z*)-isomer:** <sup>1</sup>H NMR (400 MHz, CDCl<sub>3</sub>) δ (ppm): 9.89 (brs, 1H), 7.91 (d, *J* = 16.4 Hz, 1H), 6.27 (d, *J* = 16.0 Hz, 1H), 4.23–4.18 (m, 2H), 2.47 (q, *J* = 7.6 Hz, 2H), 1.72–1.64 (m,

2H), 1.47–1.37 (m, 2H), 1.18 (t,  $J = 7.6$  Hz, 3H), 0.95 (t,  $J = 7.6$  Hz, 3H);  $^{13}\text{C}$  NMR (101 MHz,  $\text{CDCl}_3$ )  $\delta$  (ppm): 166.7, 155.4, 130.5, 125.4, 65.1, 30.7, 24.4, 17.7, 11.6.

**HRMS (ESI):**  $m/z$   $[\text{M}+\text{Na}]^+$  calcd for  $\text{C}_{10}\text{H}_{17}\text{NNaO}_3^+$ : 222.1101; found: 222.1092.

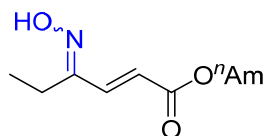

**Pentyl (2E,4E)- and (2E,4Z)-4-(hydroxyimino)hex-2-enoate (60a)** was synthesized by the general procedure **B** from pentyl (*E*)-hex-2-enoate (184.3 mg, 1 mmol) and purified by flash column chromatography on silica gel (gradient elution: Petroleum ether : EtOAc = 20:1) to afford the product (*2E,4E/4Z*)-**60a** as a mixture of *E/Z* isomers. No epoxide was obtained from the reaction.

*The E/Z isomerism is with respect to C=N bond. Ratio of (2E,4E)/(2E,4Z) = 7:3;*

**60a:** 117.3 mg, 55% yield, colorless oil; **rsm:** 38.7 mg, 21%;

**Major (2E,4E)-isomer:**  $^1\text{H}$  NMR (400 MHz,  $\text{CDCl}_3$ )  $\delta$  (ppm): 9.79 (brs, 1H), 7.19 (d,  $J = 16.0$  Hz, 1H), 6.16 (d,  $J = 16.0$  Hz, 1H), 4.15–4.09 (m, 2H), 2.49 (q,  $J = 7.6$  Hz, 2H), 1.64–1.59 (m, 2H), 1.31–1.27 (m, 4H), 1.04 (t,  $J = 7.6$  Hz, 3H), 0.84 (t,  $J = 6.8$  Hz, 3H);  $^{13}\text{C}$  NMR (101 MHz,  $\text{CDCl}_3$ )  $\delta$  (ppm): 166.7, 160.1, 140.5, 122.7, 65.2, 28.4, 28.2, 22.4, 14.0.

**Minor (2E,4Z)-isomer:**  $^1\text{H}$  NMR (400 MHz,  $\text{CDCl}_3$ )  $\delta$  (ppm): 9.79 (brs, 1H), 7.84 (d,  $J = 16.4$  Hz, 1H), 6.20 (d,  $J = 16.0$  Hz, 1H), 4.15–4.09 (m, 2H), 2.40 (q,  $J = 7.6$  Hz, 2H), 1.64–1.59 (m, 2H), 1.31–1.27 (m, 4H), 1.10 (t,  $J = 7.6$  Hz, 3H), 0.84 (t,  $J = 6.8$  Hz, 3H);  $^{13}\text{C}$  NMR (101 MHz,  $\text{CDCl}_3$ )  $\delta$  (ppm): 166.7, 155.4, 130.5, 125.4, 65.4, 28.4, 24.4, 17.7, 11.6.

**HRMS (ESI):**  $m/z$   $[\text{M}+\text{Na}]^+$  calcd for:  $\text{C}_{11}\text{H}_{19}\text{NNaO}_3^+$ : 236.1257; found: 236.1249.

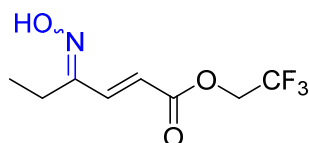

**2,2,2-Trifluoroethyl (2E,4E/4Z)-4-(hydroxyimino)hex-2-enoate (61a)** was synthesized by the general procedure **B** from 2,2,2-trifluoroethyl (*E*)-hex-2-enoate (196.2 mg, 1 mmol) and purified by flash column chromatography on silica gel (gradient elution: Petroleum ether : EtOAc = 10:1) to afford the product (*2E,4E/4Z*)-**61a** as a mixture of *E/Z* isomers. No epoxide was obtained from the reaction.

The *E/Z* isomerism is with respect to *C=N* bond. Ratio of (2*E*,4*E*)/(2*E*,4*Z*) = 9:1;

**61a**: 27.1 mg, 12% yield, colorless oil;

**Major (2*E*,4*E*)-isomer**: <sup>1</sup>H NMR (400 MHz, CDCl<sub>3</sub>) δ (ppm): 9.04 (brs, 1H), 7.35 (d, *J* = 16.4 Hz, 1H), 6.27 (d, *J* = 16.4 Hz, 1H), 4.63–4.52 (m, 2H), 2.57 (q, *J* = 7.6 Hz, 2H), 1.12 (t, *J* = 7.6 Hz, 3H). **Minor (2*E*,4*Z*)-isomer**: <sup>1</sup>H NMR (400 MHz, CDCl<sub>3</sub>) δ (ppm): 9.04 (brs, 1H), 8.01 (d, *J* = 16.4 Hz, 1H), 6.31 (d, *J* = 16.4 Hz, 1H), 4.63–4.52 (m, 2H), 2.48 (q, *J* = 7.6 Hz, 2H), 1.18 (t, *J* = 7.6 Hz, 3H).

<sup>13</sup>C NMR (101 MHz, CDCl<sub>3</sub>) δ (ppm): 164.8, 160.1, 155.2, 143.0, 132.6, 123.1 (q, *J* = 275.4 Hz), 123.0, 120.4, 60.8 (q, *J* = 36.0 Hz), 24.4, 17.7, 11.4, 10.7.

**HRMS (ESI)**: *m/z* [M+Na]<sup>+</sup> calcd for: C<sub>8</sub>H<sub>10</sub>F<sub>3</sub>NNaO<sub>3</sub><sup>+</sup>: 248.0505; found: 248.0503.

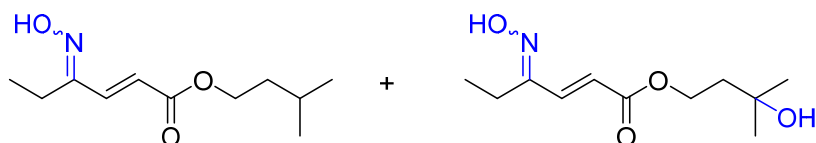

**Isopentyl (2*E*,4*E*/4*Z*)-4-(hydroxyimino)hex-2-enoate (62a)** and **3-hydroxy-3-methylbutyl (2*E*,4*E*/4*Z*)-4-(hydroxyimino)hex-2-enoate (62a-5'-OH)** was synthesized by the general procedure **B** from pentyl isopentyl (*E*)-hex-2-enoate (184.3 mg, 1 mmol) and purified by flash column chromatography on silica gel (gradient elution: Petroleum ether : EtOAc = 20:1) to afford separated (2*E*,4*E*/4*Z*)-**62a** and (2*E*,4*E*/4*Z*)-**62a-5'-OH** as mixture *E/Z* isomers. No epoxide was obtained from the reaction.

The *E/Z* isomerism is with respect to *C=N* bond. Ratio of (2*E*,4*E*)/(2*E*,4*Z*)-**62a** = 7:3, (2*E*,4*E*)/(2*E*,4*Z*)-**62a-5'-OH** = 8:3;

**(2*E*,4*E*/4*Z*)-62a**:

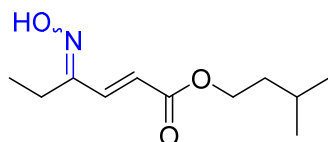

**62a**: 140.8 mg, 66% yield, colorless oil; **rsm**: 0%;

**Major (2*E*,4*E*)-isomer**: <sup>1</sup>H NMR (400 MHz, CDCl<sub>3</sub>) δ (ppm): 9.80 (brs, 1H), 7.26 (d, *J* = 16.4 Hz, 1H), 6.23 (d, *J* = 16.4 Hz, 1H), 4.26–4.21 (m, 2H), 2.57 (q, *J* = 7.6 Hz, 2H), 1.79–1.68 (m, 1H), 1.62–1.55 (m, 2H), 1.12 (t, *J* = 7.6 Hz, 3H), 0.94 (d, *J* = 6.8 Hz, 6H); <sup>13</sup>C NMR (101 MHz, CDCl<sub>3</sub>) δ (ppm): 166.7, 160.1, 140.5, 122.7, 63.7, 37.4, 25.2, 22.6, 17.7, 10.7.



**Minor (2*E*,4*Z*)-isomer:**  $^1\text{H}$  NMR (400 MHz,  $\text{CDCl}_3$ )  $\delta$  (ppm): 9.80 (brs, 1H), 7.91(d,  $J = 16.4$  Hz, 1H), 6.26 (d,  $J = 16.4$  Hz, 1H), 4.26–4.21 (m, 2H), 2.47 (q,  $J = 7.6$  Hz, 2H), 1.79–1.68 (m, 1H), 1.62–1.55 (m, 2H), 1.17 (t,  $J = 7.6$  Hz, 3H), 0.94 (d,  $J = 6.8$  Hz, 6H);  $^{13}\text{C}$  NMR (101 MHz,  $\text{CDCl}_3$ )  $\delta$  (ppm): 166.7, 155.4, 130.5, 125.4, 63.9, 37.4, 24.4, 22.6, 17.7, 11.6.

**HRMS (ESI):**  $m/z$   $[\text{M}+\text{Na}]^+$  calcd for:  $\text{C}_{11}\text{H}_{19}\text{NNaO}_3^+$ : 236.1257; found: 236.1252.

**(2*E*,4*E*/4*Z*)-62a-5'-OH:**

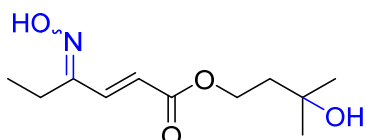

**62a-5'-OH:** 25.2 mg, 11% yield, colorless oil;

**Major (2*E*,4*E*)-isomer:**  $^1\text{H}$  NMR (400 MHz,  $\text{CDCl}_3$ )  $\delta$  (ppm): 9.07 (brs, 1H), 7.02 (d,  $J = 16.4$  Hz, 1H), 5.96 (d,  $J = 16.4$  Hz, 1H), 4.18–4.11 (m, 2H), 2.30 (q,  $J = 7.6$  Hz, 2H), 1.71–1.65 (m, 2H), 1.05 (s, 6H), 0.86 (t,  $J = 7.6$  Hz, 3H);  $^{13}\text{C}$  NMR (101 MHz,  $\text{CDCl}_3$ )  $\delta$  (ppm): 166.6, 160.1, 141.0, 122.3, 70.4, 62.0, 41.7, 29.8, 17.7, 10.7.

**Minor (2*E*,4*Z*)-isomer:**  $^1\text{H}$  NMR (400 MHz,  $\text{CDCl}_3$ )  $\delta$  (ppm): 9.07 (brs, 1H), 7.66 (d,  $J = 16.4$  Hz, 1H), 5.99 (d,  $J = 16.4$  Hz, 1H), 4.18–4.11 (m, 2H), 2.21 (q,  $J = 7.6$  Hz, 2H), 1.71–1.65 (m, 2H), 1.06 (s, 6H), 0.91 (t,  $J = 7.6$  Hz, 3H);  $^{13}\text{C}$  NMR (101 MHz,  $\text{CDCl}_3$ )  $\delta$  (ppm): 166.6, 155.4, 130.8, 125.0, 70.4, 62.1, 29.8, 28.1, 24.4, 11.7.

**HRMS (ESI):**  $m/z$   $[\text{M}+\text{Na}]^+$  calcd for:  $\text{C}_{11}\text{H}_{19}\text{NNaO}_4^+$ : 252.1206; found: 236.1207.

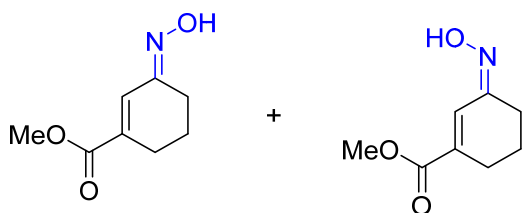

**Methyl (*E*/*Z*)-3-(hydroxyimino)cyclohex-1-ene-1-carboxylate (63a)** was synthesized by the general procedure **B** from methyl cyclohex-1-ene-1-carboxylate (140.2 mg, 1 mmol) and purified by flash column chromatography on silica gel (gradient elution: Petroleum ether : EtOAc = 40:1) to afford *E*-**63a** and *Z*-**63a** as two separated single isomers. No epoxide was obtained from the reaction;

***E*-63a isomer:**

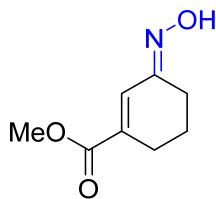

**E-63a:** 47.4 mg, 28% yield, white solid;  $^1\text{H}$  NMR (400 MHz,  $\text{CDCl}_3$ )  $\delta$  (ppm): 9.70 (brs, 1H), 7.13 (s, 1H), 3.78 (s, 3H), 2.61 (t,  $J = 6.6$  Hz, 2H), 2.43 (t,  $J = 6.0$  Hz, 2H), 1.79 (quint,  $J = 6.4$  Hz, 2H);  $^{13}\text{C}$  NMR (101 MHz,  $\text{CDCl}_3$ )  $\delta$  (ppm): 167.4, 156.5, 136.5, 132.3, 52.2, 24.3, 22.0, 20.6; **HRMS (ESI):**  $m/z$   $[\text{M}+\text{Na}]^+$  calcd for  $\text{C}_8\text{H}_{11}\text{NNaO}_3^+$ : 192.0631; found: 192.0632.

**Z-63a isomer:**

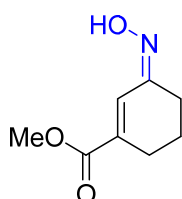

**Z-63a:** 53.2 mg, 32% yield, white solid;  $^1\text{H}$  NMR (400 MHz,  $\text{CDCl}_3$ )  $\delta$  (ppm): 9.50 (brs, 1H), 7.76 (s, 1H), 3.79 (s, 3H), 2.47 (t,  $J = 6.0$  Hz, 2H), 2.41 (t,  $J = 6.4$  Hz, 2H), 1.86 (quint,  $J = 6.4$  Hz, 2H);  $^{13}\text{C}$  NMR (101 MHz,  $\text{CDCl}_3$ )  $\delta$  (ppm): 167.7, 153.0, 139.0, 123.0, 52.3, 27.7, 25.5, 22.0; **HRMS (ESI):**  $m/z$   $[\text{M}+\text{Na}]^+$  calcd for  $\text{C}_8\text{H}_{11}\text{NNaO}_3^+$ : 192.0631; found: 192.0631.

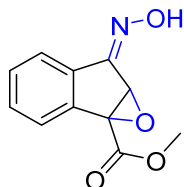

**Methyl (E)-6-(hydroxyimino)-6,6a-dihydro-1aH-indeno[1,2-b]oxirene-1a-carboxylate (64a)** was synthesized by the general procedure **B** from methyl 1*H*-indene-3-carboxylate (174.2 mg, 1 mmol) and purified by flash column chromatography on silica gel (gradient elution: Petroleum ether : EtOAc = 20:1) to afford the product **E-64a** as the major isomer.

**64a:** 61.4 mg, 28% yield, white solid; **rsm:** <5%;

$^1\text{H}$  NMR (400 MHz,  $\text{DMSO}-d_6$ )  $\delta$  (ppm): 12.12 (s, 1H), 7.83–7.78 (m, 1H), 7.65–7.60 (m, 1H), 7.47–7.40 (m, 2H), 5.02 (s, 1H), 3.82 (s, 3H);  $^{13}\text{C}$  NMR (101 MHz,  $\text{DMSO}-d_6$ )  $\delta$  (ppm): 166.0, 151.9, 138.6, 136.2, 129.8, 129.6, 126.7, 121.7, 61.1, 55.3, 52.9;

**HRMS (ESI):**  $m/z$   $[\text{M}+\text{Na}]^+$  calcd for:  $\text{C}_{11}\text{H}_9\text{NNaO}_4^+$ : 242.0424; found: 242.0424.

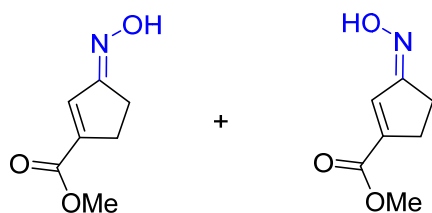

**Methyl (*E/Z*)-3-(hydroxyimino)cyclopent-1-ene-1-carboxylate (65a)** was synthesized by the general procedure **B** from methyl methyl cyclopent-1-ene-1-carboxylate (126.1 mg, 1 mmol) and purified by flash column chromatography on silica gel (gradient elution: Petroleum ether : EtOAc = 40:1) to afford *E*-**65a** and *Z*-**65a** as two separated single isomers, and the structure of *E*-**65a** was assigned based on the X-ray structure (see Section 13). No epoxide was obtained from the reaction. *E*-**65a** isomer:

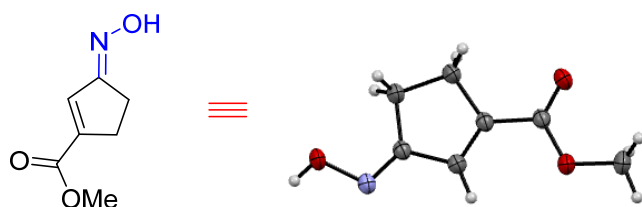

*E*-**65a**: 83.8 mg, 54% yield, white solid;  $^1\text{H}$  NMR (400 MHz,  $\text{CDCl}_3$ )  $\delta$  (ppm): 9.51 (brs, 1H), 7.00 (s, 1H), 3.79 (s, 3H), 2.92–2.62 (m, 4H);  $^{13}\text{C}$  NMR (101 MHz,  $\text{CDCl}_3$ )  $\delta$  (ppm): 167.4, 165.1, 147.8, 136.5, 52.1, 29.8, 25.3. The X-ray structure of *E*-**65a** has been determined.

*Z*-**65a** isomer:

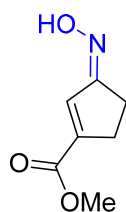

*Z*-**65a**: 29.6 mg, 19% yield; white solid;  $^1\text{H}$  NMR (400 MHz,  $\text{CDCl}_3$ )  $\delta$  (ppm): 8.85 (brs, 1H), 7.42 (s, 1H), 3.81 (s, 3H), 2.74 (m, 4H);  $^{13}\text{C}$  NMR (101 MHz,  $\text{CDCl}_3$ )  $\delta$  (ppm): 165.5, 164.1, 148.8, 129.7, 52.3, 29.0, 27.0.

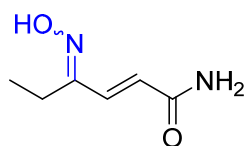

**(2E,4E/4Z) 4-(hydroxyimino)hex-2-enamide (66a)** was synthesized by the general procedure **B** from (*E*)-hex-2-enamide (113.2 mg, 1 mmol) and purified by flash column chromatography on silica gel (gradient elution: Petroleum ether : EtOAc = 3:1 to 1:1) to afford the product (2E,4E/4Z)-**66a** as a mixture of *E/Z* isomers. And epoxide was also obtained from the reaction.

*The E/Z isomerism is with respect to C=N bond., Ratio of (2E,4E)/(2E,4Z) = 3:1;*

**66a**: 25.6 mg, 18% yield, white solid; **rsm**: <5%;

**Major (2E,4E)-isomer**: <sup>1</sup>H NMR (400 MHz, DMSO-*d*<sub>6</sub>) δ (ppm): 11.58 (s, 1H), 7.56 (brs, 1H), 7.15 (brs, 1H), 6.89 (d, *J* = 16.0 Hz, 1H), 6.33 (d, *J* = 16.0 Hz, 1H), 2.42 (q, *J* = 7.6 Hz, 2H), 1.00 (t, *J* = 7.6 Hz, 3H); <sup>13</sup>C NMR (101 MHz, DMSO-*d*<sub>6</sub>) δ (ppm): 166.1, 157.8, 135.8, 124.7, 16.8, 10.3.

**Minor (2E,4Z)-isomer**: <sup>1</sup>H NMR (400 MHz, DMSO-*d*<sub>6</sub>) δ (ppm): 11.24 (s, 1H), 7.65 (brs, 1H), 7.55 (d, *J* = 16.4 Hz, 1H), 7.25 (brs, 1H), 6.36 (d, *J* = 16.4 Hz, 1H), 2.36 (q, *J* = 7.6 Hz, 2H), 1.07 (t, *J* = 7.6 Hz, 3H); <sup>13</sup>C NMR (101 MHz, DMSO-*d*<sub>6</sub>) δ (ppm): 166.2, 153.2, 127.2, 125.7, 23.5, 11.5.

**HRMS (ESI)**: *m/z* [M+Na]<sup>+</sup> calcd for C<sub>6</sub>H<sub>10</sub>N<sub>2</sub>NaO<sub>2</sub><sup>+</sup>: 165.0634; found: 165.0631.

### 3-Propyloxirane-2-carboxamide (66b):

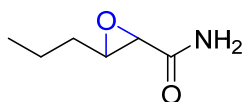

**66b**: 43.9 mg, 34% yield; <sup>1</sup>H NMR (400 MHz, CDCl<sub>3</sub>) δ (ppm): 6.59 (brs, 1H), 6.21 (brs, 1H), 3.15–3.13 (m, 1H), 3.00–2.95 (m, 1H), 1.63–1.40 (m, 4H), 0.92 (t, *J* = 7.2 Hz, 3H); <sup>13</sup>C NMR (101 MHz, CDCl<sub>3</sub>) δ (ppm): 172.4, 59.4, 55.0, 33.7, 19.00, 13.8; **HRMS (ESI)**: *m/z* [M+Na]<sup>+</sup> calcd for C<sub>6</sub>H<sub>11</sub>NNaO<sub>2</sub><sup>+</sup>: 152.0682; found: 152.0679.

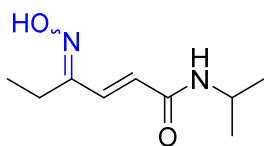

**(2E,4E/4Z)-4-(hydroxyimino)-N-isopropylhex-2-enamide (67a)** was synthesized by the general procedure **B** from (*E*)-*N*-isopropylhex-2-enamide (155.2 mg, 1 mmol) and purified by flash column chromatography on silica gel (gradient elution: Petroleum ether : EtOAc = 3:1) to afford one product (2E,4E/4Z)-**67a** as an *E/Z* mixture, and another product (2E,4E/4Z)-**66a** as an *E/Z* mixture. No epoxide was obtained from the reaction.

*The of E/Z isomerism is with respect to C=N bond. Ratio of (2E,4E)/(2E,4Z) = 4:1;*

**67a**: 119.7 mg, 65% yield, white solid; and **66a**, 29.9 mg, 21% yield; **rsm**: <5%;

**Major (2*E*,4*E*)-isomer:**  $^1\text{H}$  NMR (400 MHz, DMSO-*d*<sub>6</sub>)  $\delta$  (ppm): 11.55 (s, 1H), 8.01 (d,  $J$  = 7.6 Hz, 1H), 6.87 (d,  $J$  = 16.0 Hz, 1H), 6.32 (d,  $J$  = 16.0 Hz, 1H), 3.97–3.84 (m, 1H), 2.41 (q,  $J$  = 7.6 Hz, 2H), 1.08 (d,  $J$  = 6.4 Hz, 6H), 0.99 (t,  $J$  = 7.4 Hz, 3H);  $^{13}\text{C}$  NMR (101 MHz, DMSO-*d*<sub>6</sub>)  $\delta$  (ppm): 163.3, 157.8, 135.0, 125.0, 40.2, 22.1, 16.8, 10.3.

**Minor (2*E*,4*Z*)-isomer:**  $^1\text{H}$  NMR (400 MHz, DMSO-*d*<sub>6</sub>)  $\delta$  (ppm): 11.21 (s, 1H), 8.12 (d,  $J$  = 7.6 Hz, 1H), 7.54 (d,  $J$  = 16.4 Hz, 1H), 6.36 (d,  $J$  = 16.4 Hz, 1H), 3.97–3.84 (m, 1H), 2.35 (q,  $J$  = 7.6 Hz, 2H), 1.08 (d,  $J$  = 6.4 Hz, 6H), 0.99 (t,  $J$  = 7.4 Hz, 3H);  $^{13}\text{C}$  NMR (101 MHz, DMSO-*d*<sub>6</sub>)  $\delta$  (ppm): 163.4, 153.3, 127.5, 124.9, 40.3, 23.6, 22.0, 11.5.

**HRMS (ESI):**  $m/z$   $[\text{M}+\text{Na}]^+$  calcd for  $\text{C}_9\text{H}_{16}\text{N}_2\text{NaO}_2^+$ : 207.1104; found: 207.1109.

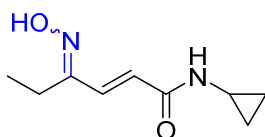

**(2*E*,4*E*/4*Z*)-*N*-cyclopropyl-4-(hydroxyimino)hex-2-enamide (68a)** was synthesized by the general procedure **B** from (*E*)-*N*-cyclopropylhex-2-enamide (153.2 mg, 1 mmol) and purified by flash column chromatography on silica gel (gradient elution: Petroleum ether : EtOAc = 3:1) to afford the product (2*E*,4*E*/4*Z*)-**68a** as a mixture of *E*/*Z* isomers. No epoxide was obtained from the reaction.

The *E*/*Z* isomerism is with respect to  $\text{C}=\text{N}$  bond. Ratio of (2*E*,4*E*)/(2*E*,4*Z*) = 4:1;

**68a:** 93.0 mg, 51%, white solid; **rsm:** 23.0 mg, 15%;

**Major (2*E*,4*E*)-isomer:**  $^1\text{H}$  NMR (400 MHz, DMSO-*d*<sub>6</sub>)  $\delta$  (ppm): 11.56 (s, 1H), 8.19 (s, 1H), 6.89 (d,  $J$  = 16.0 Hz, 1H), 6.25 (d,  $J$  = 16.0 Hz, 1H), 2.78–2.68 (m, 1H), 2.40 (q,  $J$  = 7.6 Hz, 2H), 0.98 (t,  $J$  = 7.6 Hz, 3H), 0.68–0.63 (m, 2H), 0.46–0.39 (m, 2H);  $^{13}\text{C}$  NMR (101 MHz, DMSO-*d*<sub>6</sub>)  $\delta$  (ppm): 165.4, 157.7, 135.0, 124.3, 22.2, 16.7, 10.3, 5.5.

**Minor (2*E*,4*Z*)-isomer:**  $^1\text{H}$  NMR (400 MHz, DMSO-*d*<sub>6</sub>)  $\delta$  (ppm): 11.23 (s, 1H), 8.30 (s, 1H), 7.55 (d,  $J$  = 16.4 Hz, 1H), 6.29 (d,  $J$  = 16.4 Hz, 1H), 2.78–2.68 (m, 1H), 2.34 (q,  $J$  = 7.6 Hz, 2H), 1.06 (t,  $J$  = 7.6 Hz, 3H), 0.68–0.63 (m, 2H), 0.46–0.39 (m, 2H);  $^{13}\text{C}$  NMR (101 MHz, DMSO-*d*<sub>6</sub>)  $\delta$  (ppm): 165.5, 153.2, 126.9, 124.9, 23.5, 22.2, 11.4, 5.5.

**HRMS (ESI):**  $m/z$   $[\text{M}+\text{Na}]^+$  calcd for  $\text{C}_9\text{H}_{14}\text{N}_2\text{NaO}_2^+$ : 205.0947; found: 205.0943.

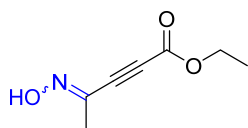

**Ethyl (*E/Z*)-4-(hydroxyimino)pent-2-ynoate (69a)** was synthesized by the general procedure **B** from ethyl pent-2-ynoate (126.2 mg, 1 mmol) and purified by flash column chromatography on silica gel (gradient elution: Petroleum ether : EtOAc = 20:1) to afford the product (*E/Z*)-**69a** as a mixture of *E/Z* isomers.

The *E/Z* isomerism is with respect to C=N bond. Ratio of *E/Z* = 1:1.

**69a**: 32.6 mg, 21% yield, colorless oil;

**<sup>1</sup>H NMR** (400 MHz, CDCl<sub>3</sub>) δ (ppm): 9.06 (brs, 1H), 4.32–4.23 (m, 2H), 2.10 (s, 1.5H), 2.07 (s, 1.5H), 1.34–1.30 (m, 3H);

**<sup>13</sup>C NMR** (101 MHz, CDCl<sub>3</sub>) δ (ppm): 153.4, 153.2, 141.6, 137.1, 89.3, 81.2, 80.3, 75.7, 62.8, 62.6, 19.6, 15.5, 14.1.

**HRMS (ESI)**: *m/z* [M+Na]<sup>+</sup> calcd for C<sub>7</sub>H<sub>9</sub>NNaO<sub>3</sub><sup>+</sup>: 178.0475; found 178.0475.

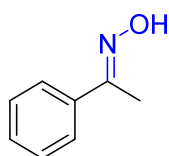

**(*E*)-1-Phenylethan-1-one oxime (70a)**<sup>107</sup> was synthesized by the general procedure **C** from ethylbenzene (53.1 mg, 0.5 mmol) and purified by flash column chromatography on silica gel (gradient elution: Petroleum ether : EtOAc = 10:1) to afford the product *E*-**70a** as a single isomer.

**70a**: 52.7 mg, 78% yield, white solid;

**<sup>1</sup>H NMR** (400 MHz, CDCl<sub>3</sub>) δ (ppm): 8.76 (brs, 1H), 7.70–7.56 (m, 2H), 7.45–7.33 (m, 3H), 2.31 (s, 3H); **<sup>13</sup>C NMR** (101 MHz, CDCl<sub>3</sub>) δ (ppm): 156.1, 136.6, 129.4, 128.7, 126.2, 12.5; **HRMS**

(ESI) *m/z* [M+H]<sup>+</sup> calcd for C<sub>8</sub>H<sub>10</sub>NO<sup>+</sup>: 136.0757; found 136.0757.

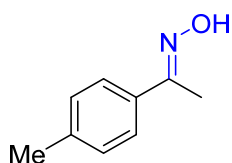

**(*E*)-1-(*p*-Tolyl)ethan-1-one oxime (71a)**<sup>115</sup> was synthesized by the general procedure **C** from 1-ethyl-4-methylbenzene (60.1 mg, 0.5 mmol) and purified by flash column chromatography on

silica gel (gradient elution: Petroleum ether : EtOAc = 10:1) to afford the product *E*-**71a** as a single isomer.

**71a**: 64.5 mg, 86% yield, white solid;

<sup>1</sup>H NMR (400 MHz, CDCl<sub>3</sub>) δ (ppm): 8.99 (brs, 1H), 7.53 (d, *J* = 8.0 Hz, 2H), 7.20 (d, *J* = 8.0 Hz, 2H), 2.37 (s, 3H), 2.29 (s, 3H); <sup>13</sup>C NMR (101 MHz, CDCl<sub>3</sub>) δ (ppm): 156.1, 139.4, 133.9, 129.4, 126.1, 21.4, 12.3; HRMS (ESI) *m/z* [M+H]<sup>+</sup> calcd for C<sub>9</sub>H<sub>12</sub>NO<sup>+</sup>: 150.0913, found 150.0920.

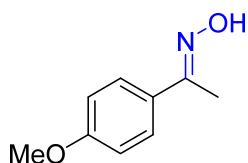

(*E*)-1-(4-Methoxyphenyl)ethan-1-one oxime (**72a**)<sup>115</sup> was synthesized by the general procedure C from 1-ethyl-4-methoxybenzene (68.1 mg, 0.5 mmol) and purified by flash column chromatography on silica gel (gradient elution: Petroleum ether : EtOAc = 10:1) to afford the product *E*-**72a** as a single isomer.

**72a**: 54.8 mg, 66% yield, white solid;

<sup>1</sup>H NMR (400 MHz, CDCl<sub>3</sub>) δ (ppm): 8.81 (brs, 1H), 7.58 (d, *J* = 8.4 Hz, 2H), 6.91 (d, *J* = 8.4 Hz, 2H), 3.83 (s, 3H), 2.28 (s, 3H); <sup>13</sup>C NMR (101 MHz, CDCl<sub>3</sub>) δ (ppm): 160.6, 155.7, 129.2, 127.5, 114.0, 55.5, 12.3; HRMS (ESI) *m/z* [M+Na]<sup>+</sup> calcd for C<sub>9</sub>H<sub>11</sub>NNaO<sub>2</sub><sup>+</sup>: 188.0682, found 188.0679.

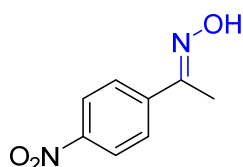

(*E*)-1-(4-Nitrophenyl)ethan-1-one oxime (**73a**)<sup>115</sup> was synthesized by the general procedure C from 1-ethyl-4-nitrobenzene (75.6 mg, 0.5 mmol) and purified by flash column chromatography on silica gel (gradient elution: Petroleum ether : EtOAc = 10:1 to 6:1) to afford the product *E*-**73a** as a single isomer.

**73a**: 79.5 mg, 88% yield, white solid;

<sup>1</sup>H NMR (400 MHz, CDCl<sub>3</sub>) δ (ppm): 8.24 (d, *J* = 8.4 Hz, 2H), 8.07 (brs, 1H), 7.81 (d, *J* = 8.4 Hz, 2H), 2.32 (s, 3H); <sup>13</sup>C NMR (101 MHz, CD<sub>3</sub>OD) δ (ppm): 153.8, 149.1, 144.8, 127.8, 124.4, 11.5; HRMS (ESI) *m/z* [M+Na]<sup>+</sup> calcd for C<sub>8</sub>H<sub>8</sub>N<sub>2</sub>NaO<sub>3</sub><sup>+</sup>: 203.0427, found 203.0428.

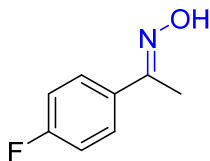

**(E)-1-(4-Fluorophenyl)ethan-1-one oxime (74a)**<sup>115</sup> was synthesized by the general procedure C from 1-ethyl-4-fluorobenzene (62.1 mg, 0.5 mmol) and purified by flash column chromatography on silica gel (gradient elution: Petroleum ether : EtOAc = 10:1) to afford the product *E*-74a as a single isomer.

**74a:** 69.7 mg, 91% yield, white solid;

**<sup>1</sup>H NMR** (400 MHz, CDCl<sub>3</sub>) δ (ppm): 8.42 (brs, 1H), 7.64–7.58 (m, 2H), 7.10–7.04 (m, 2H), 2.28 (s, 3H); **<sup>13</sup>C NMR** (101 MHz, CDCl<sub>3</sub>) δ (ppm): 163.6 (d, *J*<sub>C-F</sub> = 247.0 Hz), 155.3, 132.7 (d, *J*<sub>C-F</sub> = 4.0 Hz), 128.0 (d, *J*<sub>C-F</sub> = 8.0 Hz), 115.7 (d, *J*<sub>C-F</sub> = 21.0 Hz), 12.51; **<sup>19</sup>F NMR** (376 MHz, CDCl<sub>3</sub>) δ (ppm): -112.2; **HRMS** (ESI) *m/z* [M+Na]<sup>+</sup> calcd for C<sub>8</sub>H<sub>8</sub>FNNaO<sup>+</sup>: 176.0482, found 176.0488.

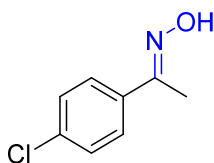

**(E)-1-(4-Chlorophenyl)ethan-1-one oxime (75a)**<sup>115</sup> was synthesized by the general procedure C from 1-chloro-4-ethylbenzene (70.3 mg, 0.5 mmol) and purified by flash column chromatography on silica gel (gradient elution: Petroleum ether : EtOAc = 10:1) to afford the product *E*-75a as a single isomer.

**75a:** 75.5 mg, 89% yield, white solid;

**<sup>1</sup>H NMR** (400 MHz, CDCl<sub>3</sub>) δ (ppm): 8.67 (brs, 1H), 7.56 (d, *J* = 8.4 Hz, 2H), 7.35 (d, *J* = 8.8 Hz, 2H), 2.28 (s, 3H); **<sup>13</sup>C NMR** (101 MHz, CDCl<sub>3</sub>) δ (ppm): 155.3, 135.4, 135.0, 128.9, 127.5, 12.3; **HRMS** (ESI) *m/z* [M+H]<sup>+</sup> calcd for C<sub>8</sub>H<sub>9</sub>ClNO<sup>+</sup>: 170.0367, found 170.0372.

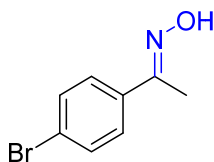

**(E)-1-(4-Bromophenyl)ethan-1-one oxime (76a)**<sup>107</sup> was synthesized by the general procedure C from 1-bromo-4-ethylbenzene (92.6 mg, 0.5 mmol) and purified by flash column chromatography



on silica gel (gradient elution: Petroleum ether : EtOAc = 10:1) to afford the product *E*-**76a** as a single isomer.

**76a**: 92.5 mg, 86% yield, white solid;

<sup>1</sup>H NMR (400 MHz, CDCl<sub>3</sub>) δ (ppm): 7.96 (brs, 1H), 7.51 (s, 4H), 2.26 (s, 3H); <sup>13</sup>C NMR (101 MHz, CDCl<sub>3</sub>) δ (ppm): 155.3, 135.5, 131.8, 127.7, 123.7, 12.3; HRMS (ESI) m/z [M+Na]<sup>+</sup> calcd for C<sub>8</sub>H<sub>8</sub>BrNaNO<sup>+</sup>: 235.9681, found 235.9686.

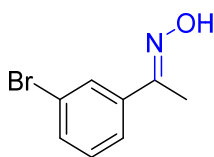

*(E)*-1-(3-Bromophenyl)ethan-1-one oxime (**77a**)<sup>115</sup> was synthesized by the general procedure C from 1-bromo-3-ethylbenzene (92.6 mg, 0.5 mmol) and purified by flash column chromatography on silica gel (gradient elution: Petroleum ether : EtOAc = 10:1) to afford the product *E*-**77a** as a single isomer.

**77a**: 85.6 mg, 80% yield, white solid;

<sup>1</sup>H NMR (400 MHz, CDCl<sub>3</sub>) δ (ppm): 8.52 (brs, 1H), 7.81–7.79 (m, 1H), 7.60–7.51 (m, 2H), 7.31–7.27 (m, 1H), 2.30 (s, 3H); <sup>13</sup>C NMR (101 MHz, CDCl<sub>3</sub>) δ (ppm): 155.1, 138.6, 132.3, 130.1, 129.3, 124.8, 122.8, 12.4; HRMS (ESI) m/z [M+Na]<sup>+</sup> calcd for C<sub>8</sub>H<sub>8</sub>BrNaNO<sup>+</sup>: 235.9681, found 235.9690.

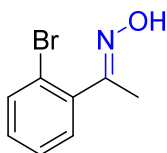

*(E)*-1-(2-Bromophenyl)ethan-1-one oxime (**78a**) was synthesized by the general procedure C from 1-bromo-2-ethylbenzene (92.6 mg, 0.5 mmol) and purified by flash column chromatography on silica gel (gradient elution: Petroleum ether : EtOAc = 10:1) to afford the product *E*-**78a** as a single isomer.

**78a**: 76.0 mg, 71% yield, white solid;

<sup>1</sup>H NMR (400 MHz, CDCl<sub>3</sub>) δ (ppm): 8.59 (brs, 1H), 7.61–7.58 (m, 1H), 7.36–7.27 (m, 2H), 7.26–7.20 (m, 1H), 2.26 (s, 3H); <sup>13</sup>C NMR (101 MHz, CDCl<sub>3</sub>) δ (ppm): 158.1, 138.9, 133.3, 130.3,

127.6, 121.9, 16.1; **HRMS** (ESI)  $m/z$   $[M+Na]^+$  calcd for  $C_8H_8BrNaNO^+$ : 235.9681, found 235.9688.

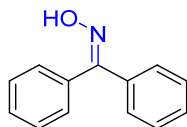

**Diphenylmethanone oxime (79a)**<sup>116</sup> was synthesized by the general procedure **C** from diphenylmethane (84.1 mg, 0.5 mmol) and purified by flash column chromatography on silica gel (gradient elution: Petroleum ether : EtOAc = 10:1) to afford the product of **79a**.

**79a**: 66.1 mg, 67% yield, white solid;

**<sup>1</sup>H NMR** (400 MHz,  $CDCl_3$ )  $\delta$  (ppm): 9.33 (brs, 1), 7.50–7.44 (m, 6H), 7.42–7.30 (m, 4H); **<sup>13</sup>C NMR** (101 MHz,  $CDCl_3$ )  $\delta$  (ppm): 158.0, 136.3, 132.8, 129.7, 129.4, 129.3, 128.5, 128.4, 128.0;

**HRMS** (ESI)  $m/z$   $[M+Na]^+$  calcd for  $C_{13}H_{11}NNaO^+$ : 220.0733, found 220.0740.

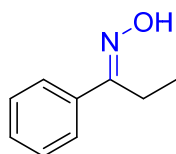

**(E)-1-Phenylpropan-1-one oxime (80a)**<sup>115</sup> was synthesized by the general procedure **C** from propylbenzene (60.1 mg, 0.5 mmol) and purified by flash column chromatography on silica gel (gradient elution: Petroleum ether : EtOAc = 10:1) to afford the product **E-80a** as a single isomer.

**80a**: 64.5 mg, 86% yield, white solid;

**<sup>1</sup>H NMR** (400 MHz,  $CDCl_3$ )  $\delta$  (ppm): 9.34 (brs, 1H), 7.65–7.61 (m, 2H), 7.42–7.37 (m, 3H), 2.84 (q,  $J$  = 7.6 Hz, 2H), 1.19 (t,  $J$  = 7.6 Hz, 3H); **<sup>13</sup>C NMR** (101 MHz,  $CDCl_3$ )  $\delta$  (ppm): 160.9, 135.7, 129.3, 128.7, 126.4, 19.9, 11.0; **HRMS** (ESI)  $m/z$   $[M+Na]^+$  calcd for  $C_9H_{11}NNaO^+$ : 172.0733, found 172.0733.

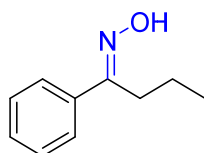

**(E)-1-Phenylbutan-1-one oxime (81a)**<sup>115</sup> was synthesized by the general procedure **C** from butylbenzene (67.1 mg, 0.5 mmol) and purified by flash column chromatography on silica gel (gradient elution: Petroleum ether : EtOAc = 10:1) to afford the product **E-81a** as a single isomer.

**81a:** 67.0 mg, 82% yield, white solid;

$^1\text{H}$  NMR (400 MHz,  $\text{CDCl}_3$ )  $\delta$  (ppm): 9.13 (brs, 1H), 7.63–7.59 (m, 2H), 7.43–7.36 (m, 3H), 2.81 (t,  $J$  = 7.6 Hz, 2H), 1.67–1.56 (m, 2H), 0.99 (t,  $J$  = 7.2 Hz, 3H);  $^{13}\text{C}$  NMR (101 MHz,  $\text{CDCl}_3$ )  $\delta$  (ppm): 159.9, 136.0, 129.3, 128.7, 126.5, 28.2, 19.9, 14.4; HRMS (ESI)  $m/z$   $[\text{M}+\text{Na}]^+$  calcd for  $\text{C}_{10}\text{H}_{13}\text{NNaO}^+$ : 186.0889, found 186.0883.

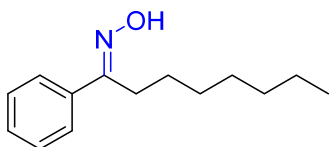

**(E)-1-Phenyl-octan-1-one oxime (82a)** was synthesized by the general procedure C from octylbenzene (95.2 mg, 0.5 mmol) and purified by flash column chromatography on silica gel (gradient elution: Petroleum ether : EtOAc = 10:1) to afford the product **E-82a** as a single isomer.

**82a:** 87.7 mg, 80% yield, white solid;

$^1\text{H}$  NMR (400 MHz,  $\text{CDCl}_3$ )  $\delta$  (ppm): 9.20 (brs, 1H), 7.63–7.59 (m, 2H), 7.42–7.37 (m, 3H), 2.82 (t,  $J$  = 7.6 Hz, 2H), 1.62–1.53 (m, 2H), 1.42–1.23 (m, 8H), 0.88 (t,  $J$  = 6.4 Hz, 3H);  $^{13}\text{C}$  NMR (101 MHz,  $\text{CDCl}_3$ )  $\delta$  (ppm): 160.1, 136.0, 129.3, 128.7, 126.5, 31.9, 30.0, 29.2, 26.5, 26.4, 22.8, 14.2; HRMS (ESI)  $m/z$   $[\text{M}+\text{Na}]^+$  calcd for  $\text{C}_{14}\text{H}_{21}\text{NNaO}^+$ : 242.1515, found 242.1513.

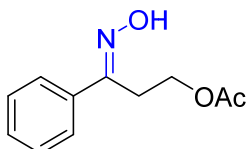

**(E)-3-(Hydroxyimino)-3-phenylpropyl acetate (83a)** was synthesized by the general procedure C from 3-phenylpropyl acetate (89.1 mg, 0.5 mmol) and purified by flash column chromatography on silica gel (gradient elution: Petroleum ether : EtOAc = 10:1) to afford the product **E-83a** as a single isomer.

**83a:** 86.0 mg, 83% yield, colorless oil;

$^1\text{H}$  NMR (400 MHz,  $\text{CDCl}_3$ )  $\delta$  (ppm): 9.46 (brs, 1H), 7.66–7.62 (m, 2H), 7.42–7.37 (m, 3H), 4.36 (t,  $J$  = 7.2 Hz, 2H), 3.18 (t,  $J$  = 7.2 Hz, 2H), 1.97 (s, 3H);  $^{13}\text{C}$  NMR (101 MHz,  $\text{CDCl}_3$ )  $\delta$  (ppm): 171.2, 156.2, 135.6, 129.6, 128.8, 126.4, 60.9, 26.5, 21.0; HRMS (ESI)  $m/z$   $[\text{M}+\text{Na}]^+$  calcd for  $\text{C}_{11}\text{H}_{13}\text{NNaO}_3^+$ : 230.0788, found 230.0785.

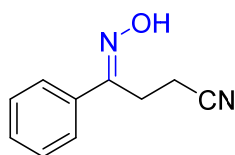

**(E)-4-(Hydroxyimino)-4-phenylbutanenitrile (84a)** was synthesized by the general procedure C from 4-phenylbutanenitrile (72.6 mg, 0.5 mmol) and purified by flash column chromatography on silica gel (gradient elution: Petroleum ether : EtOAc = 10:1) to afford the product *E*-**84a** as a single isomer.

**84a:** 77.5 mg, 89% yield, white solid;

$^1\text{H}$  NMR (400 MHz,  $\text{CDCl}_3$ )  $\delta$  (ppm): 9.17 (brs, 1H), 7.63–7.59 (m, 2H), 7.46–7.41 (m, 3H), 3.17 (t,  $J$  = 7.6 Hz, 2H), 2.70 (t,  $J$  = 7.6 Hz, 2H);  $^{13}\text{C}$  NMR (101 MHz,  $\text{CDCl}_3$ )  $\delta$  (ppm): 156.2, 134.3, 130.0, 129.0, 126.3, 118.9, 22.9, 14.0; HRMS (ESI)  $m/z$   $[\text{M}+\text{Na}]^+$  calcd for  $\text{C}_{10}\text{H}_{10}\text{N}_2\text{NaO}^+$ : 197.0685, found 197.0688.

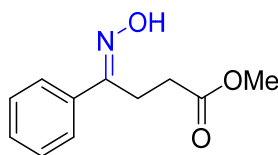

**Methyl (E)-4-(hydroxyimino)-4-phenylbutanoate (85a)**<sup>116</sup> was synthesized by the general procedure C from methyl 4-phenylbutanoate (89.1 mg, 0.5 mmol) and purified by flash column chromatography on silica gel (gradient elution: Petroleum ether : EtOAc = 10:1) to afford the product *E*-**85a** as a single isomer.

**85a:** 86.0 mg, 83% yield, colorless oil;

$^1\text{H}$  NMR (400 MHz,  $\text{CDCl}_3$ )  $\delta$  (ppm): 9.33 (brs, 1H), 7.63–7.59 (m, 2H), 7.41–7.37 (m, 3H), 3.66 (s, 3H), 3.14 (t,  $J$  = 8.0 Hz, 2H), 2.64 (t,  $J$  = 8.0 Hz, 2H);  $^{13}\text{C}$  NMR (101 MHz,  $\text{CDCl}_3$ )  $\delta$  (ppm): 173.2, 158.2, 135.2, 129.6, 128.8, 126.4, 51.9, 30.6, 22.1; HRMS (ESI)  $m/z$   $[\text{M}+\text{Na}]^+$  calcd for  $\text{C}_{11}\text{H}_{13}\text{NNaO}_3^+$ : 230.0788, found 230.0785.

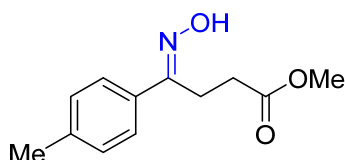

**Methyl (E)-4-(hydroxyimino)-4-(p-tolyl)butanoate (86a)** was synthesized by the general procedure C from methyl 4-(p-tolyl)butanoate (96.1 mg, 0.5 mmol) and purified by flash column

chromatography on silica gel (gradient elution: Petroleum ether : EtOAc = 10:1) to afford the product *E*-**86a** as a single isomer.

**86a**: 90.7 mg, 82% yield, colorless oil;

<sup>1</sup>H NMR (400 MHz, CDCl<sub>3</sub>) δ (ppm): 8.60 (brs, 1H), 7.50 (d, *J* = 8.0 Hz, 2H), 7.19 (d, *J* = 8.0 Hz, 2H), 3.66 (s, 3H), 3.11 (t, *J* = 8.0 Hz, 2H), 2.61 (t, *J* = 8.8 Hz, 2H), 2.37 (s, 3H); <sup>13</sup>C NMR (101 MHz, CDCl<sub>3</sub>) δ (ppm): 173.3, 158.0, 139.7, 132.3, 129.5, 126.3, 51.9, 30.6, 22.0, 21.4; HRMS (ESI) *m/z* [M+H]<sup>+</sup> calcd for C<sub>12</sub>H<sub>16</sub>NO<sub>3</sub><sup>+</sup>: 222.1125, found 222.1132.

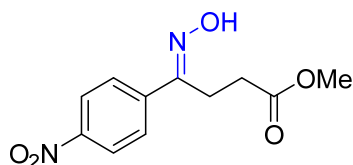

**Methyl (E)-4-(hydroxyimino)-4-(4-nitrophenyl)butanoate (87a)** was synthesized by the general procedure C from methyl 4-(4-nitrophenyl)butanoate (111.6 mg, 0.5 mmol) and purified by flash column chromatography on silica gel (gradient elution: Petroleum ether : EtOAc = 10:1 to 5:1) to afford the product *E*-**87a** as a single isomer.

**87a**: 107.0 mg, 85% yield, yellow oil;

<sup>1</sup>H NMR (400 MHz, CDCl<sub>3</sub>) δ (ppm): 8.94 (brs, 1H), 8.23 (d, *J* = 8.8 Hz, 2H), 7.80 (d, *J* = 8.8 Hz, 2H), 3.66 (s, 3H), 3.13 (t, *J* = 8.0 Hz, 2H), 2.66 (t, *J* = 8.0 Hz, 2H); <sup>13</sup>C NMR (101 MHz, CDCl<sub>3</sub>) δ (ppm): 173.0, 156.7, 148.4, 141.4, 127.3, 124.0, 52.1, 30.3, 21.9; HRMS (ESI) *m/z* [M+Na]<sup>+</sup> calcd for C<sub>11</sub>H<sub>12</sub>N<sub>2</sub>NaO<sub>5</sub><sup>+</sup>: 275.0638, found 275.0644.

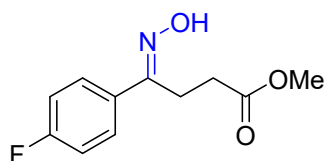

**Methyl (E)-4-(4-fluorophenyl)-4-(hydroxyimino)butanoate (88a)** was synthesized by the general procedure C from methyl 4-(4-fluorophenyl)butanoate (98.1 mg, 0.5 mmol) and purified by flash column chromatography on silica gel (gradient elution: Petroleum ether : EtOAc = 10:1) to afford the product *E*-**88a** as a single isomer.

**88a**: 100.5 mg, 89% yield, colorless oil;

<sup>1</sup>H NMR (400 MHz, CDCl<sub>3</sub>) δ (ppm): 9.06 (brs, 1H), 7.62–7.57 (m, 2H), 7.10–7.04 (m, 2H), 3.66 (s, 3H), 3.10 (t, *J* = 8.0 Hz, 2H), 2.62 (t, *J* = 8.0 Hz, 2H); <sup>13</sup>C NMR (101 MHz, CDCl<sub>3</sub>) δ (ppm):

173.2, 163.7 (d,  $J_{\text{C-F}} = 248.0$  Hz), 157.4, 131.3 (d,  $J_{\text{C-F}} = 4.0$  Hz), 128.3 (d,  $J_{\text{C-F}} = 8.0$  Hz), 115.8 (d,  $J_{\text{C-F}} = 22.0$  Hz), 52.0, 30.5, 22.2;  $^{19}\text{F}$  NMR (376 MHz,  $\text{CDCl}_3$ )  $\delta$  (ppm): -111.6; HRMS (ESI)  $m/z$   $[\text{M}+\text{Na}]^+$  calcd for  $\text{C}_{11}\text{H}_{12}\text{FNNaO}_3^+$ : 248.0693, found 248.0694.

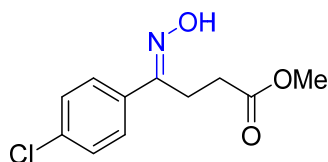

**Methyl (*E*)-4-(4-chlorophenyl)-4-(hydroxyimino)butanoate (89a)** was synthesized by the general procedure C from methyl 4-(4-chlorophenyl)butanoate (106.3 mg, 0.5 mmol) and purified by flash column chromatography on silica gel (gradient elution: Petroleum ether : EtOAc = 10:1) to afford the product *E*-**89a** as a single isomer.

**89a**: 103.9 mg, 86% yield, colorless oil;

$^1\text{H}$  NMR (400 MHz,  $\text{CDCl}_3$ )  $\delta$  (ppm): 9.38 (brs, 1H), 7.54 (d,  $J = 8.4$  Hz, 2H), 7.35 (d,  $J = 8.4$  Hz, 2H), 3.65 (s, 3H), 3.09 (t,  $J = 8.0$  Hz, 2H), 2.62 (t,  $J = 8.0$  Hz, 2H);  $^{13}\text{C}$  NMR (101 MHz,  $\text{CDCl}_3$ )  $\delta$  (ppm): 173.2, 157.3, 135.7, 133.6, 129.0, 127.7, 52.0, 30.4, 22.0; HRMS (ESI)  $m/z$   $[\text{M}+\text{Na}]^+$  calcd for  $\text{C}_{11}\text{H}_{12}\text{ClNNaO}_3^+$ : 264.0398, found 264.0400.

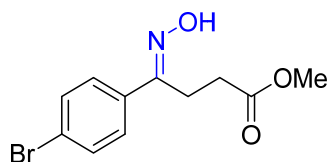

**Methyl (*E*)-4-(4-bromophenyl)-4-(hydroxyimino)butanoate (90a)** was synthesized by the general procedure C from methyl 4-(4-bromophenyl)butanoate (128.6 mg, 0.5 mmol) and purified by flash column chromatography on silica gel (gradient elution: Petroleum ether : EtOAc = 10:1) to afford the product *E*-**90a** as a single isomer.

**90a**: 125.9 mg, 88% yield, colorless oil;

$^1\text{H}$  NMR (400 MHz,  $\text{CDCl}_3$ )  $\delta$  (ppm): 8.82 (brs, 1H), 7.53–7.46 (m, 4H), 3.66 (s, 3H), 3.08 (t,  $J = 8.0$  Hz, 2H), 2.61 (t,  $J = 8.0$  Hz, 2H);  $^{13}\text{C}$  NMR (101 MHz,  $\text{CDCl}_3$ )  $\delta$  (ppm): 173.1, 157.4, 134.1, 132.0, 128.0, 124.0, 52.0, 30.5, 21.9; HRMS (ESI)  $m/z$   $[\text{M}+\text{Na}]^+$  calcd for  $\text{C}_{11}\text{H}_{12}\text{BrNNaO}_3^+$ : 307.9893, found 307.9892.

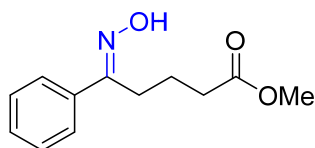

**Methyl (*E*)-5-(hydroxyimino)-5-phenylpentanoate (91a)** was synthesized by the general procedure **C** from methyl 5-phenylpentanoate (96.1 mg, 0.5 mmol) and purified by flash column chromatography on silica gel (gradient elution: Petroleum ether : EtOAc = 10:1) to afford the product *E*-**91a** as a single isomer.

**91a**: 92.9 mg, 84% yield, colorless oil;

**<sup>1</sup>H NMR** (400 MHz, CDCl<sub>3</sub>) δ (ppm): 8.45 (brs, 1H), 7.66–7.61(m, 2H), 7.42–7.36 (m, 3H), 3.67 (s, 3H), 2.87 (t, *J* = 7.6 Hz, 2H), 2.41 (t, *J* = 7.6 Hz, 2H), 1.92 (quint, *J* = 7.6 Hz, 2H); **<sup>13</sup>C NMR** (101 MHz, CDCl<sub>3</sub>) δ (ppm): 173.8, 159.1, 135.5, 129.5, 128.8, 126.4, 51.7, 33.7, 25.3, 21.7; **HRMS** (ESI) *m/z* [M+Na]<sup>+</sup> calcd for C<sub>12</sub>H<sub>15</sub>NNaO<sub>3</sub><sup>+</sup>: 244.0944, found 244.0945.

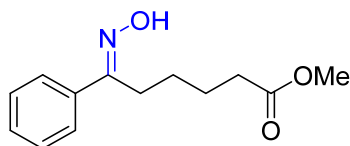

**Methyl (*E*)-6-(hydroxyimino)-6-phenylhexanoate (92a)** was synthesized by the general procedure **C** from methyl 6-phenylhexanoate (103.1 mg, 0.5 mmol) and purified by flash column chromatography on silica gel (gradient elution: Petroleum ether : EtOAc = 10:1) to afford the product *E*-**92a** as a single isomer.

**92a**: 95.3 mg, 81% yield, colorless oil;

**<sup>1</sup>H NMR** (400 MHz, CDCl<sub>3</sub>) δ (ppm): 8.91 (brs, 1H), 7.62–7.57 (m, 2H), 7.41–7.36 (m, 3H), 3.65 (s, 3H), 2.84 (t, *J* = 7.6 Hz, 2H), 2.34 (t, *J* = 7.6 Hz, 2H), 1.72 (quint, *J* = 7.6 Hz, 2H), 1.66–1.53 (m, 2H); **<sup>13</sup>C NMR** (101 MHz, CDCl<sub>3</sub>) δ (ppm): 174.1, 159.5, 135.7, 129.4, 128.7, 126.4, 51.7, 33.9, 25.9, 25.8, 25.1; **HRMS** (ESI) *m/z* [M+Na]<sup>+</sup> calcd for C<sub>13</sub>H<sub>17</sub>NNaO<sub>3</sub><sup>+</sup>: 258.1101, found 258.1100.

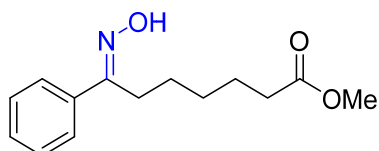

**Methyl (*E*)-7-(hydroxyimino)-7-phenylheptanoate (93a)** was synthesized by the general procedure **C** from methyl 7-phenylheptanoate (110.2 mg, 0.5 mmol) and purified by flash column chromatography on silica gel (gradient elution: Petroleum ether : EtOAc = 10:1) to afford the product **E-93a** as a single isomer.

**93a**: 103.5 mg, 83% yield, colorless oil;

**<sup>1</sup>H NMR** (400 MHz, CDCl<sub>3</sub>) δ (ppm): 9.27 (brs, 1H), 7.61–7.57 (m, 2H), 7.42–7.35 (m, 3H), 3.65 (s, 3H), 2.82 (t, *J* = 7.6 Hz, 2H), 2.30 (t, *J* = 7.6 Hz, 2H), 1.70–1.53 (m, 4H), 1.46–1.36 (m, 2H); **<sup>13</sup>C NMR** (101 MHz, CDCl<sub>3</sub>) δ (ppm): 174.3, 159.7, 135.8, 129.3, 128.7, 126.4, 51.6, 34.0, 29.3, 26.09, 26.05, 24.7; **HRMS** (ESI) *m/z* [M+Na]<sup>+</sup> calcd for C<sub>14</sub>H<sub>19</sub>NNaO<sub>3</sub><sup>+</sup>: 272.1257, found 272.1256.

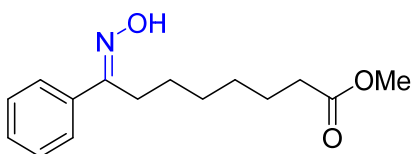

**Methyl (*E*)-8-(hydroxyimino)-8-phenyloctanoate (94a)** was synthesized by the general procedure **C** from methyl 8-phenyloctanoate (117.1 mg, 0.5 mmol) and purified by flash column chromatography on silica gel (gradient elution: Petroleum ether : EtOAc = 10:1) to afford the product **E-94a** as a single isomer.

**94a**: 105.3 mg, 80% yield, colorless oil;

**<sup>1</sup>H NMR** (400 MHz, CDCl<sub>3</sub>) δ (ppm): 8.98 (brs, 1H), 7.62–7.57 (m, 2H), 7.42–7.35 (m, 3H), 3.65 (s, 3H), 2.80 (t, *J* = 7.6 Hz, 2H), 2.29 (t, *J* = 7.6 Hz, 2H), 1.65–1.51 (m, 4H), 1.43–1.29 (m, 4H); **<sup>13</sup>C NMR** (101 MHz, CDCl<sub>3</sub>) δ (ppm): 174.4, 159.8, 135.9, 129.3, 128.7, 126.4, 51.6, 34.1, 29.5, 28.9, 26.23, 26.20, 24.9; **HRMS** (ESI) *m/z* [M+Na]<sup>+</sup> calcd for C<sub>15</sub>H<sub>21</sub>NNaO<sub>3</sub><sup>+</sup>: 286.1414, found 286.1414.

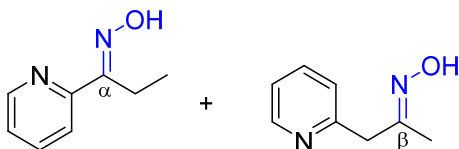

**(*E*)-1-(Pyridin-2-yl)propan-1-one oxime (95a-α-oxime) and (*E*)-1-(Pyridin-2-yl)propan-2-one oxime (95a-β-oxime) (95a)** was synthesized by the general procedure **A** or procedure **C** from 2-propylpyridine (121.2 mg, 1 mmol), and purified by flash column chromatography on silica gel



(gradient elution: Petroleum ether : EtOAc = 10:1 to 3:1 ) to afford isolated product (*E*)-**95a- $\alpha$ -oxime** as a single isomer, and small amount of **95a- $\beta$ -oxime**.

**General procedure A, 95a:**  $\alpha$ , 24.1mg, 16% yield, white solid;  $\beta$ <5%,

**General procedure C, 95a:**  $\alpha$ , 12.0 mg, 8% yield, white solid;  $\beta$ <5%;

**95a- $\alpha$ -oxime:**

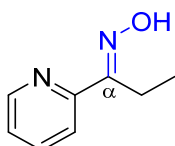

$^1\text{H}$  NMR (400 MHz,  $\text{CDCl}_3$ )  $\delta$  (ppm): 8.94 (brs, 1H), 8.57 (d,  $J$  = 4.8 Hz, 1H), 7.74 (d,  $J$  = 8.0 Hz, 1H), 7.62 (td,  $J$  = 7.6, 1.6 Hz, 1H), 7.22–7.18 (m, 1H), 2.93 (q,  $J$  = 7.6 Hz, 2H), 1.12 (t,  $J$  = 7.6 Hz, 3H);  $^{13}\text{C}$  NMR (101 MHz,  $\text{CDCl}_3$ )  $\delta$  (ppm): 161.7, 153.8 (C=N), 149.2, 136.5, 123.8, 121.1, 18.3, 10.9; **HRMS** (ESI $^{+}$ ):  $m/z$   $[\text{M}+\text{Na}]^{+}$  calculated for  $\text{C}_8\text{H}_{10}\text{N}_2\text{NaO}^{+}$ : 173.0685, found 173.0689.

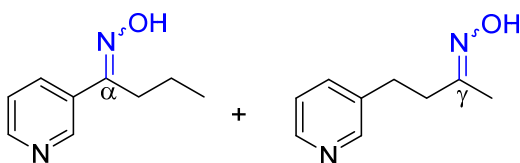

(*E/Z*)-(pyridin-3-yl)butan-1-one oxime (**96- $\alpha$ -oxime**) and (*E/Z*)-4-(pyridin-3-yl)butan-2-one oxime (**96a- $\gamma$ -oxime**) (**96a**) was synthesized by the general procedure **A** or procedure **C** from 3-butylpyridine (135.2 mg, 1 mmol) and purified by flash column chromatography on silica gel (gradient elution: Petroleum ether : EtOAc = 10:1 to 3:1 ) to afford two separated regioisomers (*E/Z*)-**96- $\alpha$ -oxime** as an *E/Z* mixture and (*E/Z*)-**96a- $\gamma$ -oxime** as an *E/Z* mixture.

The *E/Z* isomers were confirmed by  $^1\text{H}$  and  $^{13}\text{C}$  NMR, and the ratio of *E/Z* was calculated by integration of  $^1\text{H}$  and  $^{13}\text{C}$  NMR spectra;

**General procedure A, 96a:**  $\alpha$ , 13.1 mg, 8% yield, *E/Z* = 4:1, white solid;  $\gamma$ , 34.5 mg, 21% yield, *E/Z* = 2.4:1;

**General procedure C, 96a:**  $\alpha$ , 50.9 mg, 31% yield, *E/Z* = 4:1, white solid;  $\gamma$ , 11.5 mg, 7% yield, *E/Z* = 2.4:1;

(*E/Z*)-**96- $\alpha$ -oxime:**

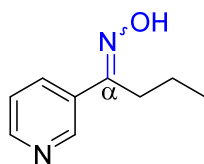

**Major *E*-isomer:**  $^1\text{H}$  NMR (400 MHz,  $\text{CDCl}_3$ )  $\delta$  (ppm): 10.17 (brs, 1H), 8.91 (d,  $J = 1.6$  Hz, 1H), 8.62–8.57 (m, 1H), 7.96–7.92 (m, 1H), 7.34–7.29 (m, 1H), 2.80 (t,  $J = 7.6$  Hz, 2H), 1.61 (sext,  $J = 7.6$  Hz, 2H), 0.99 (t,  $J = 7.6$  Hz, 3H). **Minor *Z*-isomer:**  $^1\text{H}$  NMR (400 MHz,  $\text{CDCl}_3$ )  $\delta$  (ppm): 10.17 (brs, 1H), 8.74 (d,  $J = 1.6$  Hz, 1H), 8.62–8.57 (m, 1H), 7.85–7.81 (m, 1H), 7.39–7.34 (m, 1H), 2.56 (t,  $J = 7.6$  Hz, 2H), 1.49 (sext,  $J = 7.6$  Hz, 2H), 0.93 (t,  $J = 7.6$  Hz, 3H).  $^{13}\text{C}$  NMR (101 MHz,  $\text{CDCl}_3$ )  $\delta$  (ppm): 157.1, 149.7, 149.6, 148.9, 147.7, 136.1, 133.9, 132.2, 123.5, 123.3, 37.0, 29.8, 27.7, 19.8, 14.4, 13.7.

**HRMS** (ESI $^+$ ):  $m/z$   $[\text{M}+\text{H}]^+$  calculated for  $\text{C}_9\text{H}_{13}\text{N}_2\text{O}^+$ : 165.1022, found 165.1026.

**(*E/Z*)-96a- $\gamma$ -oxime:**

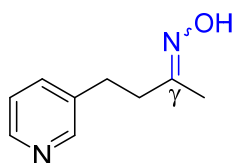

**Major *E*-isomer:**  $^1\text{H}$  NMR (400 MHz,  $\text{CDCl}_3$ )  $\delta$  (ppm): 9.64 (brs, 1H), 8.50–8.42 (m, 2H), 7.59–7.49 (m, 1H), 7.24–7.19 (m, 1H), 2.87–2.82 (m, 2H), 2.53–2.48 (m, 2H), 1.91 (s, 3H);  $^{13}\text{C}$  NMR (101 MHz,  $\text{CDCl}_3$ )  $\delta$  (ppm): 156.7, 149.8, 147.4, 136.8, 136.2, 123.6, 37.3, 29.7, 13.9. **Minor *Z*-isomer:**  $^1\text{H}$  NMR (400 MHz,  $\text{CDCl}_3$ )  $\delta$  (ppm): 9.64 (brs, 1H), 8.50–8.42 (m, 2H), 7.59–7.49 (m, 1H), 7.24–7.19 (m, 1H), 2.87–2.82 (m, 2H), 2.69–2.64 (m, 2H), 1.82 (s, 3H);  $^{13}\text{C}$  NMR (101 MHz,  $\text{CDCl}_3$ )  $\delta$  (ppm): 157.1, 149.7, 147.5, 136.8, 136.2, 123.6, 30.3, 28.8, 20.4. **HRMS** (ESI $^+$ ):  $m/z$   $[\text{M}+\text{H}]^+$  calculated for  $\text{C}_9\text{H}_{13}\text{N}_2\text{O}^+$ : 165.1022, found 165.1025.

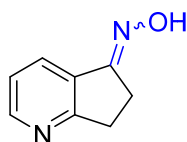

**(*E/Z*)-6,7-dihydro-5H-cyclopenta[*b*]pyridin-5-one oxime (97a)** was synthesized by the general procedure A from 6,7-dihydro-5H-cyclopenta[*b*]pyridine (119.2 mg, 1 mmol) and purified by flash column chromatography on silica gel (gradient elution: Petroleum ether : EtOAc = 10:1 to 2:1 ) to afford the product (*E/Z*)-97a as a mixture of *E/Z* isomers.

The *E/Z* isomers were confirmed by  $^1\text{H}$ ,  $^{13}\text{C}$  NMR, and the ratio of *E/Z* was calculated by integration of  $^1\text{H}$ ,  $^{13}\text{C}$  NMR spectra.

**97a:** 88.9 mg, 60% yield, *E/Z* = 7:1, white solid; **rsm:** 22.6 mg, 19%;

**Major *E*-isomer:**  $^1\text{H}$  NMR (400 MHz, DMSO-*d*<sub>6</sub>)  $\delta$  (ppm): 11.15 (brs, 1H), 8.50–8.47 (m, 2H), 7.89–7.84 (m, 1H), 7.27–7.21 (m, 1H), 3.10–3.01 (m, 2H), 2.83–2.74 (m, 2H);  $^{13}\text{C}$  NMR (101 MHz, DMSO-*d*<sub>6</sub>)  $\delta$  (ppm): 167.3, 158.5, 150.6, 129.9, 128.2, 121.9, 29.8, 23.9.

**Minor *Z*-isomer:**  $^1\text{H}$  NMR (400 MHz, DMSO-*d*<sub>6</sub>)  $\delta$  (ppm): 11.22 (brs, 1H), 8.55–8.51 (m, 2H), 7.89–7.84 (m, 1H), 7.27–7.21 (m, 1H), 3.10–3.01 (m, 2H), 2.83–2.74 (m, 2H);  $^{13}\text{C}$  NMR (101 MHz, DMSO-*d*<sub>6</sub>)  $\delta$  (ppm): 168.0, 155.4, 150.8, 135.7, 127.0, 121.6, 30.2, 25.8.

**HRMS** (ESI<sup>+</sup>):  $m/z$  [M+Na]<sup>+</sup> calculated for C<sub>8</sub>H<sub>8</sub>N<sub>2</sub>NaO<sup>+</sup>: 171.0529, found 171.0531.

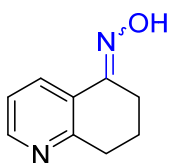

(*E/Z*)-7,8-dihydroquinolin-5(6H)-one oxime (**98a**) was synthesized by the general procedure **A** from 5,6,7,8-tetrahydroquinoline (133.2 mg, 1 mmol) and purified by flash column chromatography on silica gel (gradient elution: Petroleum ether : EtOAc = 10:1 to 2:1 ) to afford the product (*E/Z*)-**98a** as a mixture of *E/Z* isomers.

The *E/Z* isomers were confirmed by  $^1\text{H}$ ,  $^{13}\text{C}$  NMR, and the ratio of *E/Z* was calculated by integration of  $^1\text{H}$ ,  $^{13}\text{C}$  NMR spectra.

**98a:** 110.3 mg, 68% yield, *E/Z* = 14:1, white solid; **rsm:** 21.3 mg, 16% yield;

**Major *E*-isomer:**  $^1\text{H}$  NMR (400 MHz, DMSO-*d*<sub>6</sub>)  $\delta$  (ppm): 11.37 (s, 1H), 8.41 (d, *J* = 4.0 Hz, 1H), 8.14 (d, *J* = 8.0 Hz, 1H), 7.21 (dd, *J* = 8.0, 4.4 Hz, 1H), 2.84 (t, *J* = 6.2 Hz, 2H), 2.67 (t, *J* = 6.4 Hz, 2H), 1.81 (quint, *J* = 6.4 Hz, 2H);  $^{13}\text{C}$  NMR (101 MHz, DMSO-*d*<sub>6</sub>)  $\delta$  (ppm): 157.6, 151.4, 148.8, 130.6, 126.5, 121.6, 31.8, 22.6, 20.1; **HRMS** (ESI<sup>+</sup>):  $m/z$  [M+H]<sup>+</sup> calculated for C<sub>9</sub>H<sub>11</sub>N<sub>2</sub>O<sup>+</sup>: 163.0866, found 163.0868.

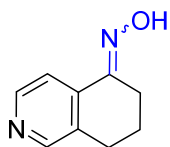

**(*E/Z*)-7,8-dihydroisoquinolin-5(6*H*)-one oxime (99a)** was synthesized by the general procedure A from 5,6,7,8-tetrahydroisoquinoline (133.2 mg, 1 mmol) and purified by flash column chromatography on silica gel (gradient elution: Petroleum ether : EtOAc = 10:1 to 2:1 ) to afford the product (*E/Z*)-**99a** as a mixture of *E/Z* isomers.

The *E/Z* isomers were confirmed by  $^1\text{H}$ ,  $^{13}\text{C}$  NMR, and the ratio of *E/Z* was calculated by integration of  $^1\text{H}$ ,  $^{13}\text{C}$  NMR spectra.

**99a**: 64.9 mg, 40% yield, *E/Z* = 7:3, white solid; **rsm**: 38.6 mg, 29%;

**Major *E*-isomer**:  $^1\text{H}$  NMR (400 MHz, DMSO-*d*<sub>6</sub>)  $\delta$  (ppm): 11.39 (s, 1H), 8.96 (s, 1H), 8.33 (d, *J* = 5.2 Hz, 1H), 7.16 (d, *J* = 4.8 Hz, 1H), 2.71–2.63 (m, 4H), 1.78–1.69 (m, 2H);  $^{13}\text{C}$  NMR (101 MHz, DMSO-*d*<sub>6</sub>)  $\delta$  (ppm): 150.7, 148.1, 146.8, 144.5, 127.1, 123.2, 28.0, 22.8, 20.0.

**Minor *Z*-isomer**:  $^1\text{H}$  NMR (400 MHz, DMSO-*d*<sub>6</sub>)  $\delta$  (ppm): 11.67 (s, 1H), 8.41 (s, 1H), 8.33 (d, *J* = 5.2 Hz, 1H), 7.67 (d, *J* = 5.2 Hz, 1H), 2.71–2.63 (m, 4H), 1.78–1.69 (m, 2H);  $^{13}\text{C}$  NMR (101 MHz, DMSO-*d*<sub>6</sub>)  $\delta$  (ppm): 150.9, 149.9, 146.8, 138.0, 133.3, 116.5, 25.5, 22.8, 20.3.

**HRMS** (ESI<sup>+</sup>): *m/z* [*M*+Na]<sup>+</sup> calculated for C<sub>9</sub>H<sub>10</sub>N<sub>2</sub>NaO<sup>+</sup>: 185.0685, found 185.0689.

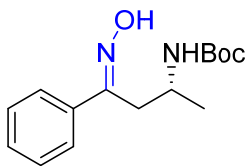

***tert*-Butyl (*R,E*)-(4-(hydroxyimino)-4-phenylbutan-2-yl)carbamate (100a)** was synthesized by the general procedure C from *tert*-butyl (*R*)-(4-phenylbutan-2-yl)carbamate (124.7 mg, 0.5 mmol) and purified by flash column chromatography on silica gel (gradient elution: Petroleum ether : EtOAc = 10:1 to 4:1) to afford the product (*R,E*)-**100a** as a single isomer.

**100a**: 116.9 mg, 84% yield, white solid;

$^1\text{H}$  NMR (400 MHz, CDCl<sub>3</sub>)  $\delta$  (ppm): 9.61 (brs, 1H), 7.65–7.61 (m, 2H), 7.40–7.35 (m, 3H), 4.87 (brs, 1H), 4.02–3.95 (m, 1H), 3.20–3.10 (m, 1H), 2.96–2.85 (m, 1H), 1.39 (s, 9H), 1.16 (d, *J* = 6.4 Hz, 3H);  $^{13}\text{C}$  NMR (101 MHz, CDCl<sub>3</sub>)  $\delta$  (ppm): 157.1, 155.4, 135.7, 129.4, 128.7, 126.5, 79.2, 45.3, 32.8, 28.5, 21.3; **HRMS** (ESI) *m/z* [*M*+Na]<sup>+</sup> calcd for C<sub>15</sub>H<sub>22</sub>N<sub>2</sub>NaO<sub>3</sub><sup>+</sup>: 301.1523, found 301.1521.

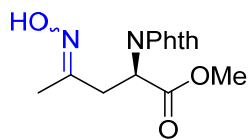

**Methyl (R,E/Z)-2-(1,3-dioxoisindolin-2-yl)-4-(hydroxyimino)pentanoate (101a)** was synthesized by the general procedure **A** from methyl (R)-2-(1,3-dioxoisindolin-2-yl)pentanoate (261.3 mg, 1 mmol) and purified by flash column chromatography on silica gel (gradient elution: Petroleum ether : EtOAc = 10:1 to 3:1 ) to afford the product (R,E/Z)-**101a** as a mixture of E/Z isomers.

The E/Z isomers were confirmed by  $^1\text{H}$  and  $^{13}\text{C}$  NMR and the ratio of E/Z was calculated by integration of  $^1\text{H}$  and  $^{13}\text{C}$  NMR spectra.

**101a:** 31.9 mg, 11% yield, E/Z = 11:1, white solid; **rsm:** 230.0 mg, 88%;

**Major E-isomer:**  $^1\text{H}$  NMR (400 MHz,  $\text{CDCl}_3$ )  $\delta$  (ppm): 7.89–7.81 (m, 2H), 7.74–7.70 (m, 2H), 5.21 (dd,  $J$  = 10.8, 4.4 Hz, 1H), 3.74 (s, 3H), 3.20–2.98 (s, 2H), 1.87 (s, 3H);  $^{13}\text{C}$  NMR (101 MHz,  $\text{CDCl}_3$ )  $\delta$  (ppm): 169.3, 167.6, 154.4, 134.3, 131.9, 123.8, 53.2, 49.1, 35.0, 13.8.

**Minor Z-isomer:**  $^1\text{H}$  NMR (400 MHz,  $\text{CDCl}_3$ )  $\delta$  (ppm): 7.89–7.81 (m, 2H), 7.74–7.70 (m, 2H), 5.32 (dd,  $J$  = 10.8, 4.8 Hz, 1H), 3.75 (s, 3H), 3.20–2.98 (s, 2H), 1.87 (s, 3H).

**HRMS** (ESI $^+$ ):  $m/z$   $[\text{M}+\text{Na}]^+$  calculated for  $\text{C}_{14}\text{H}_{14}\text{N}_2\text{NaO}_5^+$ : 313.0795, found 313.0800.

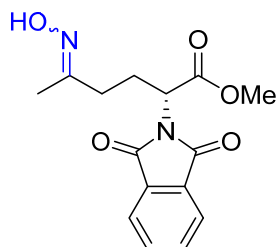

**Methyl (R,E/Z)-2-(1,3-dioxoisindolin-2-yl)-5-(hydroxyimino)hexanoate (102a)** was synthesized by the general procedure **A** from methyl (R)-2-(1,3-dioxoisindolin-2-yl)hexanoate (275.3 mg, 1 mmol) and purified by flash column chromatography on silica gel (gradient elution: Petroleum ether : EtOAc = 10:1 to 3:1 ) to afford the products (R,E/Z)-**102a** as a mixture of E/Z isomers.

The E/Z isomers were confirmed by  $^1\text{H}$  and  $^{13}\text{C}$  NMR and the ratio of E/Z was calculated by integration of  $^1\text{H}$  and  $^{13}\text{C}$  NMR spectra.

**102a:** 94.3 mg, 31% yield, E/Z = 3:1, white solid; **rsm:** 187.2 mg, 68%;

**Major *E*-isomer:**  $^1\text{H}$  NMR (400 MHz,  $\text{CDCl}_3$ )  $\delta$  (ppm): 8.61 (brs, 1H), 7.86–7.80 (m, 2H), 7.74–7.69 (m, 2H), 4.85 (dd,  $J = 10.0, 5.2$  Hz, 1H), 3.71 (s, 3H), 2.48–2.38 (m, 2H), 2.27–2.13 (m, 2H), 1.79 (s, 3H);  $^{13}\text{C}$  NMR (101 MHz,  $\text{CDCl}_3$ )  $\delta$  (ppm): 169.6, 167.8, 156.6, 134.3, 131.8, 123.7, 52.9, 51.6, 32.6, 25.4, 13.6.

**Minor *Z*-isomer:**  $^1\text{H}$  NMR (400 MHz,  $\text{CDCl}_3$ )  $\delta$  (ppm): 8.61 (brs, 1H), 7.86–7.80 (m, 2H), 7.74–7.69 (m, 2H), 4.85 (dd,  $J = 10.0, 5.2$  Hz, 1H), 3.71 (s, 3H), 2.48–2.38 (m, 2H), 2.27–2.13 (m, 2H), 1.80 (s, 3H);  $^{13}\text{C}$  NMR (101 MHz,  $\text{CDCl}_3$ )  $\delta$  (ppm): 169.6, 167.8, 156.6, 134.3, 131.8, 123.7, 52.9, 52.1, 25.5, 24.7, 19.8.

**HRMS** (ESI $^+$ ):  $m/z$   $[\text{M}+\text{Na}]^+$  calculated for  $\text{C}_{15}\text{H}_{16}\text{N}_2\text{NaO}_5^+$ : 327.0951, found 327.0951.

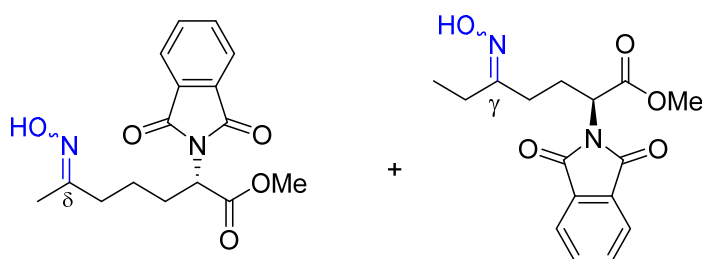

**Methyl (*S,E/Z*)-2-(1,3-dioxoisindolin-2-yl)-6-(hydroxyimino)heptanoate (103- $\delta$ -oxime) and methyl (*S,E/Z*)-2-(1,3-dioxoisindolin-2-yl)-5-(hydroxyimino)heptanoate (103- $\gamma$ -oxime) (**103a**)** was synthesized by the general procedure **A** from methyl (*S*)-2-(1,3-dioxoisindolin-2-yl)heptanoate (289.3 mg, 1 mmol) and purified by flash column chromatography on silica gel (gradient elution: Petroleum ether : EtOAc = 10:1 to 3:1 ) to afford a mixture of two regioisomers (*S,E/Z*)-**103a- $\delta$ -oxime** and (*S,E/Z*)-**103a- $\gamma$ -oxime** as white solid.

Site of oximation was assigned based on analysis of the  $^1\text{H}$  and  $^{13}\text{C}$  NMR spectra of the mixture products. The *E/Z* isomers were confirmed by  $^1\text{H}$  and  $^{13}\text{C}$  NMR and the ratio of *E/Z* isomers was calculated by integration of  $^1\text{H}$  and  $^{13}\text{C}$  NMR spectra.

**103a**: 127.3 mg, 40% yield,  $\gamma:\delta = 3:7$ ,  $\gamma$ , *E/Z* = 1:1;  $\delta$ , *E/Z* = 10:3, white solid; **rsm**: 167.2 mg, 58%.

$^1\text{H}$  NMR (400 MHz,  $\text{CDCl}_3$ )  $\delta$  (ppm): 8.86 (brs, 1H), 7.86–7.80(m, 2H), 7.74–7.68 (m, 2H), 4.91–4.79 (m, 1H), 3.69 (s, 3H), 2.46–2.12 (m, 4H), 1.77 and 1.76 (s, 1.83H, **103a- $\delta$** , *E/Z*=10:3), 1.55–1.42 (m, 1.66H), 1.26–1.16 (m, 0.49H), 1.02–0.95 (0.79H).

$^{13}\text{C}$  NMR (101 MHz,  $\text{CDCl}_3$ )  $\delta$  (ppm): 169.8, 169.7, 169.6, 169.5, 167.74, 167.72, 160.81 (**103a- $\gamma$** ), 160.79 (**103a- $\gamma$** ), 157.9 (**103a- $\delta$** , *Z*-isomer), 157.6 (**103a- $\delta$** , *E*-isomer), 134.30, 134.28, 131.82,

131.78, 123.65, 123.62, 52.85, 52.83, 52.79, 52.17, 51.82, 51.79, 51.65, 35.0, 30.4, 28.6, 28.3, 27.8, 27.4, 25.3, 24.9, 24.5, 23.0, 22.3, 20.9, 19.8, 13.4, 10.7, 10.1.

**HRMS** (ESI<sup>+</sup>):  $m/z$  [M+Na]<sup>+</sup> calculated for C<sub>16</sub>H<sub>18</sub>N<sub>2</sub>NaO<sub>5</sub><sup>+</sup>: 341.1108, found 341.1111.

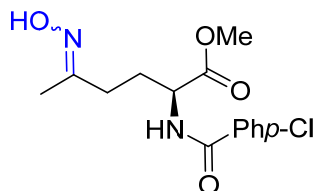

**Methyl (*S,E/Z*)-2-(4-chlorobenzamido)-5-(hydroxyimino)hexanoate (104a)** was synthesized by the general procedure A from methyl (*S*)-2-(4-chlorobenzamido) hexanoate (283.8 mg, 1 mmol) and purified by flash column chromatography on silica gel (gradient elution: Petroleum ether : EtOAc = 8:1 to 3:1) to afford the product (*S,E/Z*)-**104a** as a mixture of *E/Z* isomers.

*The E/Z isomers were confirmed by <sup>1</sup>H and <sup>13</sup>C NMR and the ratio of E/Z was calculated by integration of <sup>1</sup>H and <sup>13</sup>C NMR spectra.*

**104a**: 122.0 mg, 39% yield, *E/Z* = 3:1, white solid; **rsm**: 133.4 mg, 47%;

**Major *E*-isomer**: <sup>1</sup>H NMR (400 MHz, CDCl<sub>3</sub>) δ (ppm): 9.38 (brs, 1H), 7.72–7.68 (m, 2H), 7.48 (brs, 1H), 7.34–7.27 (m, 2H), 4.77–4.69 (m, 1H), 3.71 (s, 3H), 2.48–2.24 (m, 2H), 2.18–1.97 (m, 2H), 1.81 (s, 3H); <sup>13</sup>C NMR (101 MHz, CDCl<sub>3</sub>) δ (ppm): 172.9, 166.6, 157.5, 138.0, 132.0, 128.79, 128.75, 52.7, 52.6, 32.0, 28.1, 14.0.

**Minor *Z*-isomer**: <sup>1</sup>H NMR (400 MHz, CDCl<sub>3</sub>) δ (ppm): 9.38 (brs, 1H), 7.72–7.68 (m, 2H), 7.34–7.27 (m, 2H), 6.66 (brs, 1H), 4.82–4.77 (m, 1H), 3.71 (s, 3H), 2.48–2.24 (m, 2H), 2.18–1.97 (m, 2H), 1.80 (s, 3H); <sup>13</sup>C NMR (101 MHz, CDCl<sub>3</sub>) δ (ppm): 172.6, 169.2, 157.8, 138.3, 132.2, 131.6, 129.0, 52.7, 52.4, 27.4, 24.7, 19.8.

**HRMS** (ESI<sup>+</sup>):  $m/z$  [M+Na]<sup>+</sup> calculated for C<sub>14</sub>H<sub>17</sub>ClN<sub>2</sub>NaO<sub>4</sub><sup>+</sup>: 335.0769, found 335.0765.

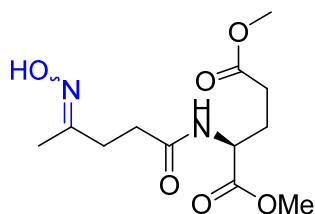

**Dimethyl (*E/Z*)-(4-(hydroxyimino)pentanoyl)-*L*-aspartate (105a)** was synthesized by the general procedure A from dimethyl pentanoyl-*L*-aspartate (259.3 mg, 1 mmol) and purified by flash

column chromatography on silica gel (gradient elution: Petroleum ether : EtOAc = 4:1 to 2:1 ) to afford the product (*E/Z*)-**105a** as a mixture of *E/Z* isomers.

The *E/Z* isomers were confirmed by  $^1\text{H}$  and  $^{13}\text{C}$  NMR and the ratio of *E/Z* was calculated by integration of  $^1\text{H}$  and  $^{13}\text{C}$  NMR spectra.

**105a**: 92.3 mg, 32% yield, *E/Z* = 7:3, colorless oil; **rsm**:155.6 mg, 60%

$^1\text{H}$  NMR (400 MHz,  $\text{CDCl}_3$ )  $\delta$  (ppm): 8.94 (brs, 1H), 6.86 (brs, 1H), 4.64–4.55 (m, 1H), 3.71–3.68 (m, 3H), 3.65–3.62 (m, 3H), 2.65–2.33 (m, 6H), 2.22–2.09 (m, 1H), 1.99–1.89 (m, 1H), 1.86–1.82 (m, 3H);

$^{13}\text{C}$  NMR (101 MHz,  $\text{CDCl}_3$ )  $\delta$  (ppm): 173.7, 173.5, 172.7, 172.6, 172.5, 172.0, 157.8, 157.0, 52.6, 52.0, 51.7, 51.5, 32.2, 31.9, 31.4, 30.1, 27.4, 27.2, 24.7, 20.1, 14.2.

**HRMS** (ESI $^+$ ):  $m/z$   $[\text{M}+\text{H}]^+$  calculated for  $\text{C}_{12}\text{H}_{21}\text{N}_2\text{O}_6^+$ : 289.1394, found 289.1405.

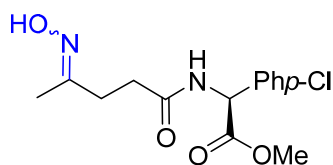

**Methyl (*S,E/Z*)-2-(4-chlorophenyl)-2-(4-(hydroxyimino)pentanamido)acetate (**106a**)** was synthesized by the general procedure **A** from methyl (*S*)-2-(4-chlorophenyl)-2-pentanamidoacetate (283.8 mg, 1 mmol) and purified by flash column chromatography on silica gel (gradient elution: Petroleum ether : EtOAc = 8:1 to 3:1 ) to afford the product (*S,E/Z*)-**106a** as a mixture of *E/Z* isomers.

The *E/Z* isomers were confirmed by  $^1\text{H}$  and  $^{13}\text{C}$  NMR and the ratio of *E/Z* was calculated by integration of  $^1\text{H}$  and  $^{13}\text{C}$  NMR spectra.

**106a**: 131.4 mg, 42% yield, *E/Z* = 11:3, white solid; **rsm**:141.9 mg, 50%;

**Major *E*-isomer**:  $^1\text{H}$  NMR (400 MHz,  $\text{CDCl}_3$ )  $\delta$  (ppm): 7.25–7.21 (m, 4H), 5.52 (d,  $J$  = 7.2 Hz, 1H), 3.65 (s, 3H), 2.48–2.39 (m, 4H), 1.80 (s, 3H).  $^{13}\text{C}$  NMR (101 MHz,  $\text{CDCl}_3$ )  $\delta$  (ppm): 171.9, 171.4, 157.1, 135.1, 134.4, 129.1, 128.8, 55.8, 53.0, 32.0, 31.3, 14.2.

**Minor *Z*-isomer**:  $^1\text{H}$  NMR (400 MHz,  $\text{CDCl}_3$ )  $\delta$  (ppm): 7.29–7.25 (m, 4H), 5.52 (d,  $J$  = 7.2 Hz, 1H), 3.65 (s, 3H), 2.64–2.39 (m, 4H), 1.76 (s, 3H).  $^{13}\text{C}$  NMR (101 MHz,  $\text{CDCl}_3$ )  $\delta$  (ppm): 171.5, 171.3, 157.7, 135.0, 134.5, 129.1, 128.8, 55.9, 53.0, 31.7, 24.6, 20.1.

**HRMS** (ESI $^+$ ):  $m/z$   $[\text{M}+\text{Na}]^+$  calculated for  $\text{C}_{14}\text{H}_{17}\text{ClN}_2\text{NaO}_4^+$ : 335.0769, found 335.0769.



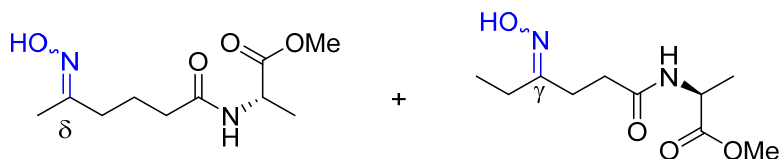

**Methyl (*E/Z*)-(5-(hydroxyimino)hexanoyl)-*L*-alaninate (107a- $\delta$ -oxime) and methyl (*E/Z*)-(4-(hydroxyimino)hexanoyl)-*L*-alaninate (107a- $\gamma$ -oxime) (107a)** was synthesized by the general procedure **A** from methyl hexanoyl-*L*-alaninate (201.3 mg, 1 mmol) and purified by flash column chromatography on silica gel (gradient elution: Petroleum ether : EtOAc = 8:1 to 3:1 ) to afford a mixture of two regioisomers (*E/Z*)-**107a- $\delta$ -oxime** and (*E/Z*)-**107a- $\gamma$ -oxime** as colorless oil.

*Site of oximation was assigned based on analysis of the  $^1\text{H}$  and  $^{13}\text{C}$  NMR of the mixture products. The *E/Z* isomers were confirmed by  $^1\text{H}$  and  $^{13}\text{C}$  NMR and the ratio of *E/Z* was calculated by integration of  $^1\text{H}$  and  $^{13}\text{C}$  NMR spectra.*

**107a:** 122.1 mg, 53% yield,  $\gamma:\delta = 1:2$ ,  $\gamma$ , *E/Z* = 1:1;  $\delta$ , *E/Z* = 3:1, colorless oil; **rsm:** 85.6 mg, 43%;  **$^1\text{H}$  NMR** (400 MHz,  $\text{CDCl}_3$ )  $\delta$  (ppm): 9.14 (brs, 1H), 6.75–6.56 (m, 0.9H), 6.20–5.78 (m, 0.3H), 4.67–4.45 (m, 1H), 3.78–3.67 (m, 3H), 2.67–2.28 (m, 2.57H), 2.25–2.15 (m, 2.5H), 1.86–1.76 (m, 2.57H), 1.65–1.55 (m, 0.47H), 1.38–1.32 (m, 2.96H), 1.30–1.21 (m, 2.15H), 1.08–1.01 (m, 1.08H), 0.90–0.78 (m, 0.99H).

**$^{13}\text{C}$  NMR** (101 MHz,  $\text{CDCl}_3$ )  $\delta$  (ppm): 174.0, 173.9, 173.8, 172.5, 172.4, 172.21, 172.19, 171.82, 161.4, 161.3, 158.1, 157.7, 52.5, 48.1, 48.0, 35.9, 35.7, 35.3, 35.0, 32.2, 32.1, 31.48, 31.45, 30.3, 30.2, 29.7, 29.2, 27.9, 27.8, 25.3, 23.7, 22.4, 22.0, 21.54, 21.52, 19.7, 18.3, 14.0, 13.5, 10.8, 10.1.

**HRMS** (ESI<sup>+</sup>):  $m/z$   $[\text{M}+\text{Na}]^+$  calculated for  $\text{C}_{10}\text{H}_{18}\text{NaN}_2\text{O}_4^+$ : 253.1159, found 253.1166.

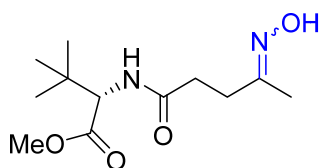

**Methyl (*S,E/Z*)-2-(4-(hydroxyimino)pentanamido)-3,3-dimethylbutanoate (108a)** was synthesized by the general procedure **A** from methyl (*S*)-3,3-dimethyl-2-pentanamidobutanoate (229.3 mg, 1 mmol) and purified by flash column chromatography on silica gel (gradient elution: Petroleum ether : EtOAc = 15:1 to 3:1 ) to afford the product (*S,E/Z*)-**108a** as a mixture of *E/Z* isomers.

The *E/Z* isomers were confirmed by  $^1\text{H}$  and  $^{13}\text{C}$  NMR and the ratio of *E/Z* was calculated by integration of  $^1\text{H}$  and  $^{13}\text{C}$  NMR spectra.

**108a:** 77.5 mg, 30% yield, *E/Z* = 3:1, white solid; **rsm:** 144.5 mg, 63%;

**Major *E*-isomer:**  $^1\text{H}$  NMR (400 MHz,  $\text{CDCl}_3$ )  $\delta$  (ppm): 9.07 (brs, 1H), 6.77 (d,  $J$  = 5.2 Hz, 1H), 4.46 (d,  $J$  = 5.6 Hz, 1H), 3.68 (s, 3H), 2.66–2.42 (m, 4H), 1.85 (s, 3H), 0.92 (s, 9H);  $^{13}\text{C}$  NMR (101 MHz,  $\text{CDCl}_3$ )  $\delta$  (ppm): 172.8, 172.3, 157.0, 60.0, 51.94, 34.7, 32.5, 31.8, 26.6, 14.2.

**Minor *Z*-isomer:**  $^1\text{H}$  NMR (400 MHz,  $\text{CDCl}_3$ )  $\delta$  (ppm): 9.07 (brs, 1H), 6.53 (d,  $J$  = 4.4 Hz, 1H), 4.46 (d,  $J$  = 5.6 Hz, 1H), 3.68 (s, 3H), 2.66–2.42 (m, 4H), 1.85 (s, 3H), 0.92 (s, 9H);  $^{13}\text{C}$  NMR (101 MHz,  $\text{CDCl}_3$ )  $\delta$  (ppm): 172.5, 171.8, 157.6, 60.1, 51.89, 34.4, 32.1, 26.6, 24.7, 20.1.

**HRMS** (ESI $^+$ ):  $m/z$   $[\text{M}+\text{H}]^+$  calculated for  $\text{C}_{12}\text{H}_{23}\text{N}_2\text{O}_4^+$ : 259.1652, found 259.1652.

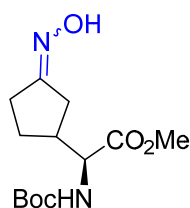

**Methyl (2*S*)-2-((*tert*-butoxycarbonyl)amino)-2-(*E/Z*)-3-(hydroxyimino)cyclopentyl) acetate (109a)** was synthesized by the general procedure **A** from methyl (*S*)-2-((*tert*-butoxycarbonyl)amino)-2-cyclopentylacetate (257.3 mg, 1 mmol) and purified by flash column chromatography on silica gel (gradient elution: Petroleum ether : EtOAc = 20:1 to 5:1) to afford the product (*S*, *E/Z*)-**109a** as a mixture of *E/Z* isomers.

The *E/Z* isomers were confirmed by  $^1\text{H}$  and  $^{13}\text{C}$  NMR and the ratio of *E/Z* was calculated by integration of  $^1\text{H}$  and  $^{13}\text{C}$  NMR spectra.

**109a:** 180.4 mg, 63% yield; colorless oil, *E/Z* = 1.6:1;

$^1\text{H}$  NMR (400 MHz,  $\text{CDCl}_3$ )  $\delta$  (ppm): 8.99 (brs, 1H), 5.33–5.20 (m, 1H), 4.40–4.30 (m, 1H), 3.72 (s, 3H), 2.73–2.55 (m, 1H), 2.52–2.15 (m, 4H), 1.94–1.80 (m, 1H), 1.59–1.47 (m, 1H), 1.41 (s, 9H).

$^{13}\text{C}$  NMR (101 MHz,  $\text{CDCl}_3$ )  $\delta$  (ppm): 172.7, 164.9, 164.7, 164.5, 155.7, 155.6, 80.3, 55.8, 55.6, 52.5, 41.8, 41.3, 33.8, 33.0, 30.2, 30.0, 29.8, 29.3, 28.4, 27.9, 27.3, 27.2, 26.8, 26.5.

**HRMS** (ESI)  $m/z$   $[\text{M}+\text{Na}]^+$  calculated for  $\text{C}_{13}\text{H}_{22}\text{N}_2\text{NaO}_5^+$ : 309.1421, found 309.1416;

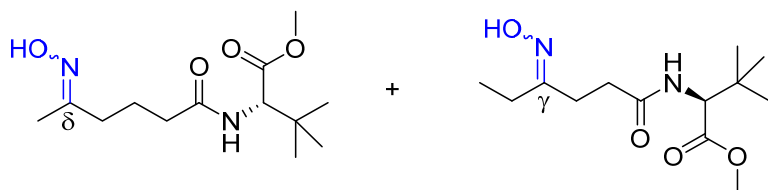

**Methyl (S,E/Z)-2-(5-(hydroxyimino)hexanamido)-3,3-dimethylbutanoate (110a- $\delta$ -oxime) and methyl (S,E/Z)-2-(4-(hydroxyimino)hexanamido)-3,3-dimethylbutanoate (110a- $\gamma$ -oxime) (110a)** was synthesized by the general procedure **A** from methyl (S)-2-hexanamido-3,3-dimethylbutanoate (243.3 mg, 1 mmol) and purified by flash column chromatography on silica gel (gradient elution: Petroleum ether : EtOAc = 8:1 to 3:1 ) to afford a mixture of two regioisomers (*E/Z*)-**110a- $\delta$ -oxime** and (*E/Z*)-**110a- $\gamma$ -oxime** as white solid.

Site of oximation was assigned based on analysis of the  $^1\text{H}$  and  $^{13}\text{C}$  NMR of the mixture products. The *E/Z* isomers were confirmed by  $^1\text{H}$  and  $^{13}\text{C}$  NMR and the ratio of *E/Z* was calculated by integration of  $^1\text{H}$  and  $^{13}\text{C}$  NMR spectra.

**110a**: 138.9 mg, 51% yield,  $\gamma:\delta = 1:3$ ,  $\gamma$ , *E/Z* = 1:1;  $\delta$ , *E/Z* = 10:3, white solid; **rsm**: 111.9 mg, 46%;

$^1\text{H}$  NMR (400 MHz,  $\text{CDCl}_3$ )  $\delta$  (ppm): 9.07 (brs, 0.6H), 6.75–6.45 (m, 0.87H), 4.46 (d,  $J = 9.6$  Hz, 1H), 3.68 (s, 3.06H), 2.62–2.28 (m, 2.03H), 2.26–2.17 (m, 2.34H), 1.89–1.78 (m, 3.13H), 1.34–1.14 (m, 1.31H), 1.03 (t,  $J = 7.6$  Hz, 0.92H), 0.93 (s, 9.15H).

$^{13}\text{C}$  NMR (101 MHz,  $\text{CDCl}_3$ )  $\delta$  (ppm): 172.71, 172.67, 172.61, 172.56, 172.50, 172.45, 161.4 (**110a- $\gamma$** ), 161.3 (**110a- $\gamma$** ), 158.0 ((*Z*)-**110a- $\delta$** ), 157.7 ((*E*)-**110a- $\delta$** ), 60.06 (**110a- $\gamma$** ), 60.04 (**110a- $\gamma$** ), 60.00 ((*Z*)-**110a- $\delta$** ), 59.97 ((*E*)-**110a- $\delta$** ), 51.89, 51.87, 35.9, 35.6, 35.1, 34.7, 32.3, 29.4, 27.9, 27.8, 26.64, 26.61, 23.7, 22.1, 21.62, 21.57, 19.7, 13.5, 10.8, 10.0.

**HRMS** (ESI $^{+}$ ):  $m/z$  [ $\text{M}+\text{H}$ ] $^{+}$  calculated for  $\text{C}_{13}\text{H}_{25}\text{N}_2\text{O}_4^{+}$ : 273.1809, found 273.1810.

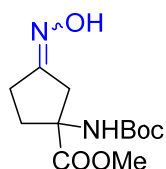

**Methyl(E/Z)-1-((tert-butoxycarbonyl)amino)-3-(hydroxyimino)cyclopentane-1-carboxylate (111a)** was synthesized by the general procedure **A** from methyl 1-((tert-butoxycarbonyl)amino)cyclopentane-1-carboxylate (243.3 mg, 1 mmol) and purified by flash column chromatography on

silica gel (gradient elution: Petroleum ether : EtOAc = 20:1 to 5:1 ) to afford the product (*E/Z*)-**111a** as a mixture of *E/Z* isomers.

The *E/Z* isomers were confirmed by  $^1\text{H}$  and  $^{13}\text{C}$  NMR and the ratio of *E/Z* was calculated by integration of  $^1\text{H}$  and  $^{13}\text{C}$  NMR spectra.

**111a**: 191.0 mg, 70% yield, *E/Z* = 3:1, colorless oil;

$^1\text{H}$  NMR (400 MHz,  $\text{CDCl}_3$ )  $\delta$  (ppm): 8.85 (brs, 1H), 5.22 (brs, 1H), 3.73 (s, 3H), 3.14–2.97 (m, 1H), 2.93–2.54 (m, 3H), 2.31–2.14 (m, 2H), 1.41 (s, 9H).

$^{13}\text{C}$  NMR (101 MHz,  $\text{CDCl}_3$ )  $\delta$  (ppm): 173.8 (*Z*), 173.5 (*E*), 162.9 (*E*), 162.4 (*Z*), 155.4 (2C), 80.6, 64.3 (*Z*), 64.2 (*E*), 52.8, 41.4, 34.0, 29.8, 28.41, 28.36, 28.3, 25.1, 24.6.

HRMS (ESI)  $m/z$   $[\text{M}+\text{Na}]^+$  calculated for  $\text{C}_{12}\text{H}_{20}\text{N}_2\text{NaO}_5^+$ : 295.1264, found 295.1265.

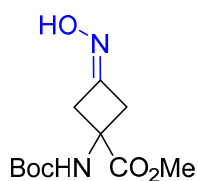

**Methyl 1-((*tert*-butoxycarbonyl)amino)-3-(hydroxyimino)cyclobutane-1-carboxylate (**112a**)**

was synthesized by the general procedure **A** from methyl 1-((*tert*-butoxycarbonyl)amino)cyclobutane-1-carboxylate (229.3 mg, 1 mmol) and purified by flash column chromatography on silica gel (gradient elution: Petroleum ether : EtOAc = 20:1 to 4:1 ) to afford the product **112a**, and remaining starting material **112**. The collected **112** was reused for oxidative oximation twice, with the amount of other reagents required based on the amount of **112** used.

**112a**: 83.7 mg, 32% yield, white solid; **rsm**: 130.7 mg, 57%;

$^1\text{H}$  NMR (400 MHz,  $\text{CDCl}_3$ )  $\delta$  (ppm): 8.32 (brs, 1H), 5.50 (brs, 1H), 3.78 (s, 3H), 2.53–2.44 (m, 2H), 3.34–2.94 (m, 2H), 1.43 (s, 9H).

$^{13}\text{C}$  NMR (101 MHz,  $\text{CDCl}_3$ )  $\delta$  (ppm): 173.3, 155.1, 152.1, 80.8, 53.3, 53.1, 42.6, 41.8, 28.4.

HRMS (ESI)  $m/z$   $[\text{M}+\text{Na}]^+$  calculated for  $\text{C}_{11}\text{H}_{18}\text{N}_2\text{NaO}_5^+$ : 281.1108, found 281.1110;

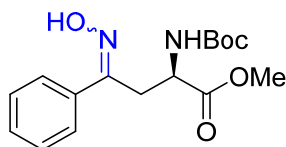

**Methyl (*R,E/Z*)-2-((*tert*-butoxycarbonyl)amino)-4-(hydroxyimino)-4-phenylbutanoate (**113a**)**

was synthesized by the general procedure **C** from methyl (*R*)-2-((*tert*-butoxycarbonyl)amino)-4-

phenylbutanoate (146.7 mg, 0.5 mmol) and purified by flash column chromatography on silica gel (gradient elution: Petroleum ether : EtOAc = 10:1 to 4:1 ) to afford the product (*R, E/Z*)-**113a** as a mixture of *E/Z* isomers.

**113a**: 128.9 mg, 80% yield, *E/Z* = 11:1; white solid;

**<sup>1</sup>H NMR** (400 MHz, CDCl<sub>3</sub>) δ (ppm): 9.71 (brs, 1H), 7.63–7.59 (m, 2H), 7.38–7.34 (m, 3H), 5.85–5.40 (m, 1H), 4.63–4.39 (m, 1H), 3.60 (s, 3H), 3.40–3.30 (m, 1H), 3.28–3.07 (m, 1H), 1.46 (s, 0.80H) 1.37 (s, 8.20H).

**<sup>13</sup>C NMR** (101 MHz, CDCl<sub>3</sub>) δ (ppm): 172.5, 155.4, 155.3, 135.2, 129.6, 128.7, 126.5, 80.1, 52.5, 51.7, 28.7, 28.4.

**HRMS** (ESI) *m/z* [M+Na]<sup>+</sup> calcd for C<sub>16</sub>H<sub>22</sub>N<sub>2</sub>NaO<sub>5</sub><sup>+</sup>: 345.1421, found 345.1423.

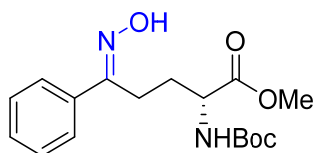

**Methyl (*R,E*)-2-((*tert*-butoxycarbonyl)amino)-5-(hydroxyimino)-5-phenylpentanoate (**114a**)** was synthesized by the general procedure **C** from methyl (*R*)-2-((*tert*-butoxycarbonyl)amino)-5-phenylpentanoate (153.7 mg, 0.5 mmol) and purified by flash column chromatography on silica gel (gradient elution: Petroleum ether : EtOAc = 10:1 to 4:1) to afford the product (*R,E*)-**114a** as a single isomer.

**114a**: 136.2 mg, 81% yield, white solid;

**<sup>1</sup>H NMR** (400 MHz, CDCl<sub>3</sub>) δ (ppm): 8.91 (brs, 1H), 7.60–7.54 (m, 2H), 7.39–7.34 (m, 3H), 5.29 (d, *J* = 8.4 Hz, 1H), 4.40 (dd, *J* = 14.0, 7.2 Hz, 1H), 3.72 (s, 3H), 2.90–2.80 (m, 2H), 2.21–2.06 (m, 1H), 2.00–1.85 (m, 1H), 1.45 (s, 9H).

**<sup>13</sup>C NMR** (101 MHz, CDCl<sub>3</sub>) δ (ppm): 173.1, 158.2, 155.6, 135.3, 129.4, 128.7, 126.2, 80.1, 53.6, 52.4, 28.9, 28.4, 22.4.

**HRMS** (ESI) *m/z* [M+Na]<sup>+</sup> calcd for C<sub>17</sub>H<sub>24</sub>N<sub>2</sub>NaO<sub>5</sub><sup>+</sup>: 359.1577, found 359.1576.

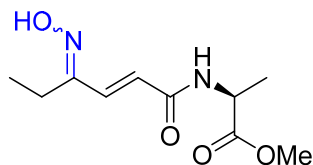

**Methyl ((2*E*,4*E*/4*Z*)-4-(hydroxyimino)hex-2-enoyl)-*L*-alaninate (115a)** was synthesized by the general procedure **B** from methyl (*E*)-hex-2-enoyl-*L*-alaninate (199.3 mg, 1 mmol) and purified by flash column chromatography on silica gel (gradient elution: Petroleum ether : EtOAc =10:1 to 3:1) to afford the product (2*E*,4*E*/4*Z*)-**115a** as a mixture of *E/Z* isomers, and epoxide was also obtained from the reaction.

The *E/Z* isomerism is with respect to the C=N bond, and ratio of (2*E*,4*E*)/(2*E*,4*Z*) = 3:1;

**115a**: 103.0 mg, 45% yield, ((2*R*, 2*R'*)-**C2**) as catalyst, white solid;

**Major (2*E*,4*E*)-isomer**: <sup>1</sup>H NMR (400 MHz, CDCl<sub>3</sub>) δ (ppm): 9.97 (brs, 1H), 7.19 (d, *J* =16.0 Hz, 1H), 6.89 (brs, 1H), 6.25 (d, *J* =16.0 Hz, 1H), 4.75–4.67 (m, 1H), 3.74 (s, 3H), 2.48 (q, *J* =7.6 Hz, 2H), 1.42 (d, *J* =7.2 Hz, 3H), 1.04 (t, *J* =7.6 Hz, 3H); <sup>13</sup>C NMR (101 MHz, CDCl<sub>3</sub>) δ (ppm): 174.1, 165.5, 159.6, 137.8, 124.1, 52.7, 48.3, 18.3, 17.8, 10.7; Chiral HPLC (chiralpak AD-H column, *n*-hexane: isopropanol = 90:10; flow rate = 0.5 mL/min): *t*<sub>major</sub> = 32.70 min., *t*<sub>minor</sub> = 35.28 min.; >99% ee.

**Minor (2*E*,4*Z*)-isomer**: <sup>1</sup>H NMR (400 MHz, CDCl<sub>3</sub>) δ (ppm): 9.97 (brs, 1H), 7.71 (d, *J* =16.4 Hz, 1H), 7.02 (brs, 1H), 6.36 (d, *J* =16.0 Hz, 1H), 4.75–4.67 (m, 1H), 3.74 (s, 3H), 2.38 (q, *J* =7.6 Hz, 2H), 1.42 (d, *J* =7.2 Hz, 3H), 1.09 (t, *J* =7.6 Hz, 3H); <sup>13</sup>C NMR (101 MHz, CDCl<sub>3</sub>) δ (ppm): 174.0, 165.5, 155.1, 127.8, 127.4, 52.7, 48.4, 24.6, 18.3, 11.7; Chiral HPLC (chiralpak AD-H column, *n*-hexane: isopropanol = 90:10; flow rate = 0.5 mL/min): *t*<sub>major</sub> = 37.89 min., *t*<sub>minor</sub> = 41.08 min.; >99% ee.

**HRMS (ESI)**: *m/z* [M+Na]<sup>+</sup> calcd for C<sub>10</sub>H<sub>16</sub>N<sub>2</sub>NaO<sub>4</sub><sup>+</sup>: 251.1002; found: 205.1010.

**Methyl (3-propyloxirane-2-carbonyl)-*L*-alaninate (115b)**

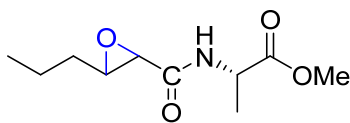

**115b**: 34% yield, *dr* = 5:1; <sup>1</sup>H NMR (400 MHz, CDCl<sub>3</sub>) δ (ppm): 6.71–6.56 (m, 1H), 4.58–4.48 (m, 0.97H), 3.81–3.79 (m, 0.61H), 3.75–3.69 (m, 3.03H), 3.20 (s, 0.89H), 2.95–2.91 (m, 0.83H), 2.08–2.05 (m, 0.83H), 1.68–1.56 (m, 1.03H), 1.54–1.42 (m, 3.06H), 1.38–1.31 (m, 2.35H), 0.97–0.91 (m, 3.17H); <sup>13</sup>C NMR (101 MHz, CDCl<sub>3</sub>) δ (ppm): 172.9, 168.7, 59.6, 55.2, 52.6, 47.5, 33.7, 19.0, 18.3, 13.8; **HRMS (ESI)**: *m/z* [M+Na]<sup>+</sup> calcd for C<sub>10</sub>H<sub>17</sub>NNaO<sub>4</sub><sup>+</sup>: 238.1050; found: 238.1043

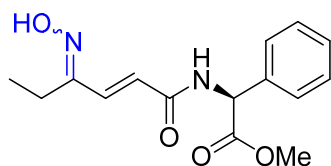

**Methyl (S)-2-((2E,4E/4Z)-4-(hydroxyimino)hex-2-enamido)-2-phenylacetate (116a)** was synthesized by the general procedure **B** from methyl (S,E)-2-(hex-2-enamido)-2-phenylacetate (261.1 mg, 1 mmol) and purified by flash column chromatography on silica gel (gradient elution: Petroleum ether : EtOAc = 3:1) to afford the products of (2E,4E/4Z)-**116a** as a mixture of *E/Z* isomers, and no epoxide was obtained from the reaction.

The *E/Z* isomerism is with respect to C=N bond, and ratio of (2E,4E)/(2E,4Z) = 3:1;

**116a**: 130.6 mg, 45% yield, white solid;

**Major (2E,4E)-isomer:** <sup>1</sup>H NMR (400 MHz, CDCl<sub>3</sub>) δ (ppm): 9.99 (brs, 1H), 7.38–7.28 (m, 5H), 7.21 (d, *J* = 16.0 Hz, 1H), 6.29 (d, *J* = 16.0 Hz, 1H), 5.72 (d, *J* = 7.2 Hz, 1H), 3.71 (s, 3H), 2.47 (q, *J* = 7.6 Hz, 2H), 1.03 (t, *J* = 7.6 Hz, 3H); <sup>13</sup>C NMR (101 MHz, CDCl<sub>3</sub>) δ (ppm): 171.8, 165.1, 159.6, 138.2, 136.2, 129.1, 128.7, 127.4, 123.8, 56.6, 53.0, 17.9, 10.7.

**Minor (2E,4Z)-isomer:** <sup>1</sup>H NMR (400 MHz, CDCl<sub>3</sub>) δ (ppm): 9.99 (brs, 1H), 7.74 (d, *J* = 16.0 Hz, 1H), 7.38–7.28 (m, 5H), 6.39 (d, *J* = 16.0 Hz, 1H), 5.73 (d, *J* = 7.6 Hz, 1H), 3.71 (s, 3H), 2.35 (q, *J* = 7.6 Hz, 2H), 1.07 (t, *J* = 7.6 Hz, 3H); <sup>13</sup>C NMR (101 MHz, CDCl<sub>3</sub>) δ (ppm): 171.7, 165.1, 155.1, 138.2, 136.1, 128.1, 127.5, 127.1, 123.8, 56.7, 53.0, 24.6, 11.7.

**HRMS (ESI):** *m/z* [M+Na]<sup>+</sup> calcd for C<sub>15</sub>H<sub>18</sub>N<sub>2</sub>NaO<sub>4</sub><sup>+</sup>: 313.1159; found: 313.1162.

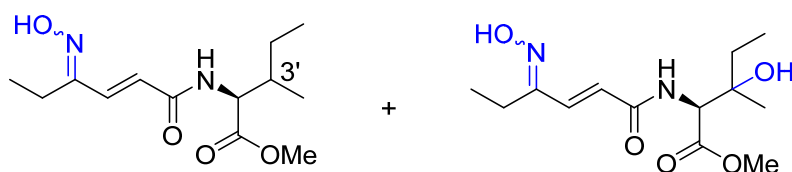

**Methyl (2S)-2-((2E,4E/4Z)-4-(hydroxyimino)hex-2-enamido)-3-methylpentanoate (117a) and methyl (2S)-3-hydroxy-2-((2E,4E/4Z)-4-(hydroxyimino)hex-2-enamido)-3-methylpentanoate (117a-3'-OH)** was synthesized by the general procedure **B** from methyl (2S)-2-((E)-hex-2-enamido)-3-methylpentanoate (241.3 mg, 1 mmol) and purified by flash column chromatography on silica gel (gradient elution: Petroleum ether : EtOAc = 3:1) to afford isolated product (2E,4E/4Z)-**117a** as an *E/Z* mixture, and trace amount of (2E,4E/4Z)-**117a-3'-OH** was also observed from the reaction. Epoxide was also obtained from the reaction.

The *E/Z* isomers is with respect to *C=N* bond, and ratio of (**2E,4E**)/(**2E,4Z**) = 2.4:1.

**Methyl (2S)-2-((2E,4E/4Z)-4-(hydroxyimino)hex-2-enamido)-3-methylpentanoate:**

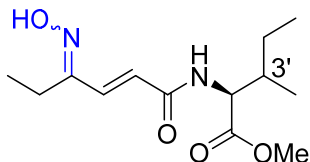

**117a: (2R, 2R')-C2** as catalyst, 116.2 mg, 43% yield, white solid; epoxide: 28% yield, *dr* = 2:1; white solid;

**<sup>1</sup>H NMR of major (2E,4E)-isomer:** (400 MHz, CDCl<sub>3</sub>) δ (ppm): 10.13 (brs, 1H), 7.19 (d, *J* = 16.0 Hz, 1H), 6.79–6.68 (m, 1H), 6.27 (d, *J* = 16.0 Hz, 1H), 4.75–4.68 (m, 1H), 3.72 (s, 3H), 2.48 (q, *J* = 7.6 Hz, 2H), 1.95–1.85 (m, 1H), 1.48–1.38 (m, 1H), 1.23–1.12 (m, 1H), 1.04 (t, *J* = 7.6 Hz, 3H), 0.91–0.85 (m, 6H).

**<sup>1</sup>H NMR of minor (2E,4Z)-isomer:** (400 MHz, CDCl<sub>3</sub>) δ (ppm): 10.13 (brs, 1H), 7.71 (d, *J* = 16.0 Hz, 1H), 6.89–6.75 (m, 1H), 6.38 (d, *J* = 16.0 Hz, 1H), 4.75–4.68 (m, 1H), 3.72 (s, 3H), 2.38 (q, *J* = 7.6 Hz, 2H), 1.95–1.85 (m, 1H), 1.48–1.38 (m, 1H), 1.23–1.12 (m, 1H), 1.09 (t, *J* = 7.6 Hz, 3H), 0.91–0.85 (m, 6H).

**<sup>13</sup>C NMR** (101 MHz, CDCl<sub>3</sub>) δ (ppm): 173.3, 173.1, 165.7, 159.5, 155.1, 137.8, 127.9, 127.5, 124.2, 56.8, 56.7, 52.4, 38.1, 25.4, 24.7, 17.9, 15.5, 11.7, 11.6, 10.7.

**HRMS (ESI):** *m/z* [M+Na]<sup>+</sup> calcd for C<sub>13</sub>H<sub>22</sub>N<sub>2</sub>NaO<sub>4</sub><sup>+</sup>: 293.1472; found: 293.1470.

**Methyl (2S)-3-methyl-2-(3-propyloxirane-2-carboxamido)pentanoate**

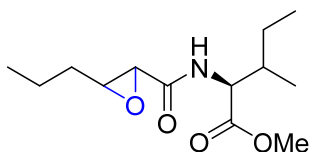

**117b:** 28% yield, *dr* = 2:1; **<sup>1</sup>H NMR** (400 MHz, CDCl<sub>3</sub>) δ (ppm): 6.61–6.49 (m, 1H), 4.53–4.47 (m, 1H), 3.70–3.67 (m, 3H), 3.21–3.19 (m, 1H), 3.00–2.86 (m, 1H), 1.90–1.78 (m, 1H), 1.65–1.60 (m, 1H), 1.55–1.42 (m, 3H), 1.39–1.29 (m, 1H), 1.16–1.03 (m, 1H), 0.95–0.91 (m, 3H), 0.88–0.81 (m, 6H); **<sup>13</sup>C NMR** (101 MHz, CDCl<sub>3</sub>) δ (ppm): 172.1, 171.8, 168.70, 168.65, 59.8, 59.5, 55.8, 55.7, 55.3, 55.2, 52.20, 52.16, 37.9, 37.7, 33.73, 33.69, 25.12, 25.05, 19.0, 15.6, 15.5, 13.8, 11.6, 11.5; **HRMS (ESI):** *m/z* [M+Na]<sup>+</sup> calcd for C<sub>13</sub>H<sub>23</sub>NNaO<sub>4</sub><sup>+</sup>: 280.1519; found: 280.1519.



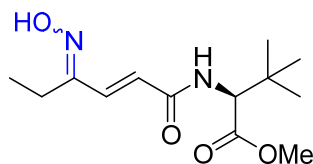

**Methyl (S)-2-((2E,4E/4Z)-4-(hydroxyimino)hex-2-enamido)-3,3-dimethylbutanoate (118a)** was synthesized by the general procedure **B** from methyl (S,E)-2-(hex-2-enamido)-3,3-dimethylbutanoate (241.3 mg, 1 mmol) and purified by flash column chromatography on silica gel (gradient elution: Petroleum ether : EtOAc = 10:1 to 3:1) to afford the product (2E,4E/4Z)-**118a** as a mixture of *E/Z* isomers, and epoxide **118b** was also obtained from the reaction.

The *E/Z* isomerism is with respect to C=N bond, and ratio of (2E,4E)/(2E,4Z) = 3:1;

(2R,2R')-C2 as catalyst, **118a**: 145.9 mg, 54% yield, white solid;

**118b**: 87.0 mg, 34% yield, *d.r.* = 4:1;

(2S,2S')-C2 as catalyst, **118a**: 86.5 mg, 32% yield, white solid;

**118b**: 121.0 mg, 47% yield, *d.r.* > 99:1;

**Major (2E,4E)-isomer:** <sup>1</sup>H NMR (400 MHz, CDCl<sub>3</sub>) δ (ppm): 10.35 (brs, 1H), 7.18 (d, *J* = 16.0 Hz, 1H), 6.85 (d, *J* = 9.6 Hz, 1H), 6.28 (d, *J* = 15.6 Hz, 1H), 4.58 (d, *J* = 9.6 Hz, 1H), 3.67 (s, 3H), 2.47–2.41 (m, 2H), 1.07–0.98 (m, 3H), 0.93 (s, 9H); <sup>13</sup>C NMR (101 MHz, CDCl<sub>3</sub>) δ (ppm): 172.7, 165.71, 165.69, 159.3, 137.9, 124.0, 60.2, 52.0, 34.9, 26.6, 17.8, 10.6.

**Minor (2E,4Z)-isomer:** <sup>1</sup>H NMR (400 MHz, CDCl<sub>3</sub>) δ (ppm): 10.35 (brs, 1H), 7.79 (d, *J* = 16.0 Hz, 1H), 6.95 (d, *J* = 9.6 Hz, 1H), 6.40 (d, *J* = 16.0 Hz, 1H), 4.59 (d, *J* = 9.6 Hz, 1H), 3.67 (s, 3H), 2.37–2.31 (m, 2H), 1.07–0.98 (m, 3H), 0.93 (s, 9H); <sup>13</sup>C NMR (101 MHz, CDCl<sub>3</sub>) δ (ppm): 172.5, 165.78, 165.75, 154.9, 127.9, 127.3, 60.3, 51.9, 34.9, 26.6, 24.6, 11.7.

**HRMS (ESI):** *m/z* [M+Na]<sup>+</sup> calcd for C<sub>13</sub>H<sub>22</sub>N<sub>2</sub>NaO<sub>4</sub><sup>+</sup>: 293.1472; found: 293.1473.

**Methyl (2S)-3,3-dimethyl-2-(3-propyloxirane-2-carboxamido)butanoate (118b):**

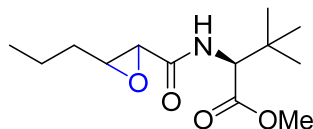

**118b:** 47% yield, *dr* > 99:1; <sup>1</sup>H NMR (400 MHz, CDCl<sub>3</sub>) δ (ppm): 6.57 (d, *J* = 9.6 Hz, 1H), 4.35 (m, d, *J* = 10.0 Hz, 1H), 3.67 (s, 3H), 3.21 (d, *J* = 2.0 Hz, 1H), 2.96–2.89 (m, 1H), 1.65–1.55 (m, 1H), 1.53–1.37 (m, 3H), 0.95–0.88 (m, 12H); <sup>13</sup>C NMR (101 MHz, CDCl<sub>3</sub>) δ (ppm): 171.7, 168.5, 59.40, 59.37, 55.1, 51.8, 34.6, 33.7, 26.5, 19.0, 13.9;

**HRMS (ESI):** *m/z* [M+Na]<sup>+</sup> calcd for C<sub>13</sub>H<sub>23</sub>NNaO<sub>4</sub><sup>+</sup>: 280.1519; found: 280.1519.

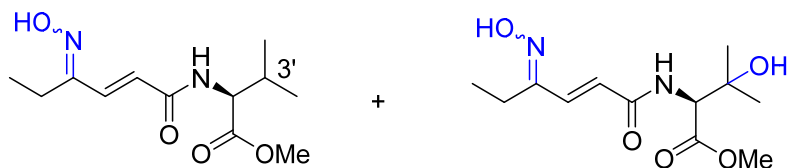

**Methyl ((2*E*,4*E*/4*Z*)-4-(hydroxyimino)hex-2-enoyl)-*L*-valinate (119a)** and **Methyl (*S*)-3-hydroxy-2-((2*E*,4*E*/4*Z*)-4-(hydroxyimino)hex-2-enamido)-3-methylbutanoate (119a-3'-OH)** was synthesized by the general Procedure **B** from methyl (*E*)-hex-2-enoyl-*L*-valinate (227.3 mg, 1 mmol) and purified by flash column chromatography on silica gel (gradient elution: Petroleum ether : EtOAc = 10:1 to 3:1) to afford isolated products (2*E*,4*E*/4*Z*)-**119a** as an *E/Z* mixture and (2*E*,4*E*/4*Z*)-**119a-3'-OH** as an *E/Z* mixture; and a small amount of epoxide was obtained from the reaction.

The *E/Z* isomerism is with respect to C=N bond, and ratio of (2*E*,4*E*)/(2*E*,4*Z*)-**119a** = 7:2, (2*E*,4*E*)/(2*E*,4*Z*)-**119a-OH** = 4:1;

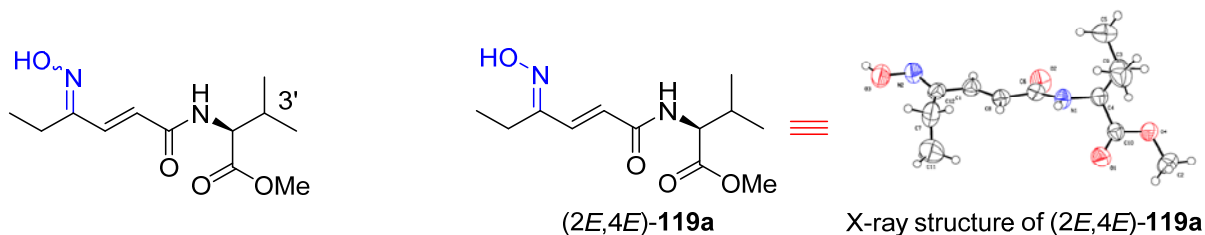

**(2*E*,4*E*/4*Z*)-119a**: 164.0 mg, 64% yield, white solid; **epoxide**: 8% yield;

**Major (2*E*,4*E*)-isomer**:  $^1\text{H}$  NMR (400 MHz,  $\text{CDCl}_3$ )  $\delta$  (ppm): 10.00 (brs, 1H), 7.21 (d,  $J$  = 16.0 Hz, 1H), 6.72 (d,  $J$  = 8.8 Hz, 1H), 6.28 (d,  $J$  = 16.0 Hz, 1H), 4.73–4.67 (m, 1H), 3.74 (s, 3H), 2.50 (q,  $J$  = 7.6 Hz, 2H), 2.14–2.12 (m, 1H), 1.06 (t,  $J$  = 7.6 Hz, 2H), 0.97–0.89 (m, 6H);  $^{13}\text{C}$  NMR (101 MHz,  $\text{CDCl}_3$ )  $\delta$  (ppm): 173.4, 165.9, 159.6, 137.8, 124.2, 57.4, 52.5, 31.5, 19.1, 18.0, 10.7.

The X-ray structure of (2*E*,4*E*)-**119a** has been determined.

**Minor (2*E*,4*Z*)-isomer**:  $^1\text{H}$  NMR (400 MHz,  $\text{CDCl}_3$ )  $\delta$  (ppm): 10.00 (brs, 1H), 7.72 (d,  $J$  = 16.4 Hz, 1H), 6.77 (d,  $J$  = 8.8 Hz, 1H), 6.40 (d,  $J$  = 16.4 Hz, 1H), 4.73–4.67 (m, 1H), 3.74 (s, 3H), 2.40 (q,  $J$  = 7.6 Hz, 2H), 2.14–2.12 (m, 1H), 1.11 (t,  $J$  = 7.6 Hz, 2H), 0.97–0.89 (m, 6H);  $^{13}\text{C}$  NMR (101 MHz,  $\text{CDCl}_3$ )  $\delta$  (ppm): 173.2, 165.8, 155.1, 127.9, 127.6, 57.5, 52.5, 24.8, 18.1, 17.9, 11.7.

**HRMS (ESI)**:  $m/z$   $[\text{M}+\text{Na}]^+$  calcd for  $\text{C}_{12}\text{H}_{20}\text{N}_2\text{NaO}_4^+$ : 279.1315; found: 279.1311.

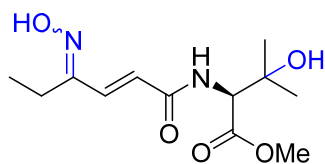

(2*E*,4*E*/4*Z*)-**119a-3'-OH**: 24.5 mg, 9% yield, white solid;

**Major (2*E*,4*E*)-isomer:**  $^1\text{H}$  NMR (400 MHz,  $\text{CDCl}_3$ )  $\delta$  (ppm): 7.16 (d,  $J = 16.0$  Hz, 1H), 7.08–6.96 (m, 1H), 6.27 (d,  $J = 16.0$  Hz, 1H), 4.64–4.58 (m, 1H), 3.70 (s, 3H), 2.44 (q,  $J = 7.6$  Hz, 2H), 1.26–1.18 (m, 6H), 1.08–0.96 (m, 3H).

**Minor (2*E*,4*Z*)-isomer:**  $^1\text{H}$  NMR (400 MHz,  $\text{CDCl}_3$ )  $\delta$  (ppm): 7.69 (d,  $J = 16.0$  Hz, 1H), 7.08–6.96 (m, 1H), 6.38 (d,  $J = 16.0$  Hz, 1H), 4.64–4.58 (m, 1H), 3.68 (s, 3H), 2.34 (q,  $J = 7.6$  Hz, 2H), 1.26–1.18 (m, 6H), 1.08–0.96 (m, 3H);

$^{13}\text{C}$  NMR (101 MHz,  $\text{CDCl}_3$ )  $\delta$  (ppm): 172.1, 166.2, 159.7 (2*E*,4*E*), 155.3 (2*E*,4*Z*), 138.2 (2*E*,4*E*), 128.2 (2*E*,4*Z*), 127.2 (2*E*,4*Z*), 123.9 (2*E*,4*E*), 72.2, 60.2, 52.6, 27.0, 26.8, 24.7, 17.9, 11.9, 10.7;

**HRMS (ESI):**  $m/z$   $[\text{M}+\text{Na}]^+$  calcd for  $\text{C}_{12}\text{H}_{20}\text{N}_2\text{NaO}_5^+$ : 295.1264; found: 295.1269.

(3*aR*,5*aS*,9*aS*,9*bR*,*E*)-9-(Hydroxyimino)-3*a*,6,6,9*a*-tetramethyldecahydronaphtho[2,1-*b*]furan-2(1*H*)-one (*E*-120*a*), (3*aR*,5*aS*,9*aS*,9*bR*,*E*)-8-(Hydroxyimino)-3*a*,6,6,9*a*-tetramethyldecahydronaphtho[2,1-*b*]furan-2(1*H*)-one (*E*-120*b*), (3*aR*,5*aS*,9*aS*,9*bR*,*Z*)-8-(Hydroxyimino)-3*a*,6,6,9*a*-tetramethyldecahydronaphtho[2,1-*b*]furan-2(1*H*)-one (*Z*-120*b*) and (3*aR*,5*aR*,9*aS*,9*bR*,*E*)-7-(Hydroxyimino)-3*a*,6,6,9*a*-tetramethyldecahydronaphtho[2,1-*b*]furan-2(1*H*)-one (*E*-120*c*) were synthesized by the general procedure A from sclareolide (250.4 mg, 1.0 mmol, 1.0 equiv.). Five different manganese catalysts, *rac*-**C1**, (*R,R*)-**C1**, (*S,S*)-**C1**, (*R,R*)-**C2**, and (*S,S*)-**C2**, were individually examined due to concerns over chirality match. (*S,S*)-**C1** was shown to be most efficient. The product was purified by flash column chromatography (gradient elution: petroleum ether : EtOAc=10:1 to 4:1, and then 3:1) to give four separated products: *E*-120*a*, *E*-120*b*, *Z*-120*b* and *E*-120*c*. The yields are shown in Table S-11.

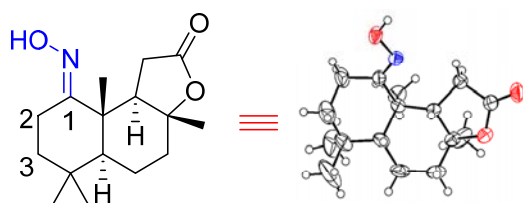

**(3a*R*,5a*S*,9a*S*,9b*R*,*E*)-9-(Hydroxyimino)-3a,6,6,9a-tetramethyldecahydronaphtho[2,1-*b*]furan-2(1*H*)-one (*E*-120a):**

<sup>1</sup>H NMR (400 MHz, CDCl<sub>3</sub>) δ (ppm): 7.16 (brs, 1H), 3.00 (dd, *J* = 16.8, 6.4 Hz, 1H), 2.87 (dt, 15.6, 6.0 Hz, 1H), 2.53 (t, *J* = 15.6 Hz, 1H), 2.40–2.26 (m, 2H), 2.10–2.02 (m, 1H), 1.87 (dd, *J* = 14.4, 3.2 Hz, 1H), 1.73–1.59 (m, 3H), 1.56–1.42 (m, 2H), 1.36 (s, 3H), 1.15 (s, 3H), 0.96 (s, 3H), 0.94 (s, 3H);

<sup>13</sup>C NMR (101 MHz, CDCl<sub>3</sub>) δ (ppm): 177.9, 166.0, 86.3, 55.2, 53.7, 43.1, 38.8, 38.0, 33.0, 32.0, 31.8, 23.0, 22.0, 21.0, 17.9, 16.3;

**HRMS (ESI):** *m/z* [M+Na]<sup>+</sup> calcd for C<sub>16</sub>H<sub>25</sub>NNaO<sub>3</sub><sup>+</sup>: 302.1727; found: 302.1730.

The structure of *E*-120a has been determined by X-ray diffraction.

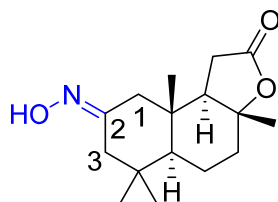

**(3a*R*,5a*S*,9a*S*,9b*R*,*E*)-8-(Hydroxyimino)-3a,6,6,9a-tetramethyldecahydronaphtho[2,1-*b*]furan-2(1*H*)-one (*E*-120b):**

<sup>1</sup>H NMR (400 MHz, CDCl<sub>3</sub>) δ (ppm): 8.48 (brs, 1H), 3.21 (d, *J* = 14.0 Hz, 1H), 2.44 (t, *J* = 15.6 Hz, 1H), 2.25 (dd, *J* = 16.0, 6.4 Hz, 1H), 2.15–2.03 (m, 3H), 1.97–1.84 (m, 2H), 1.79–1.68 (m, 1H), 1.58 (d, *J* = 14.0 Hz, 1H), 1.45–1.36 (m, 2H), 1.33 (s, 3H), 1.05 (s, 3H), 0.89 (s, 3H), 0.85 (s, 3H);

<sup>13</sup>C NMR (101 MHz, CDCl<sub>3</sub>) δ (ppm): 176.3, 157.2, 86.1, 58.3, 56.6, 45.9, 39.7, 38.7, 38.4, 36.5, 32.8, 28.8, 22.3, 21.4, 20.7, 15.4;

**HRMS (ESI):** *m/z* [M+Na]<sup>+</sup> calcd for C<sub>16</sub>H<sub>25</sub>NNaO<sub>3</sub><sup>+</sup>: 302.1727; found: 302.1731.

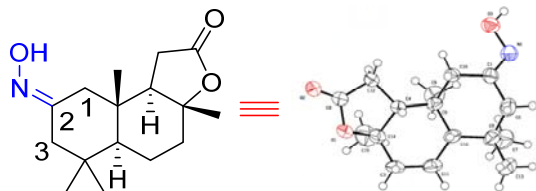

**(3a*R*,5a*S*,9a*S*,9b*R*,*Z*)-8-(Hydroxyimino)-3a,6,6,9a-tetramethyldecahydronaphtho[2,1-*b*]furan-2(1*H*)-one (*Z*-120b):**

**<sup>1</sup>H NMR** (400 MHz, CDCl<sub>3</sub>) δ (ppm): 8.67 (brs, 1H), 3.13 (d, *J* = 13.6 Hz, 1H), 2.49 (t, *J* = 15.6 Hz, 1H), 2.31 (dd, *J* = 16.0, 6.4 Hz, 1H), 2.19–2.07 (m, 3H), 2.02 (d, *J* = 13.6 Hz, 1H), 1.96–1.86 (m, 1H), 1.78–1.66 (m, 1H), 1.51–1.36 (m, 3H), 1.32 (s, 3H), 1.01 (s, 3H), 0.89 (s, 3H), 0.86 (s, 3H);

**<sup>13</sup>C NMR** (101 MHz, CDCl<sub>3</sub>) δ (ppm): 176.3, 157.2, 86.1, 58.2, 56.5, 47.2, 38.7, 38.4, 38.3, 36.5, 32.7, 28.9, 21.7, 21.3, 20.7, 15.9;

**HRMS (ESI):** *m/z* [M+Na]<sup>+</sup> calcd for C<sub>16</sub>H<sub>25</sub>NNaO<sub>3</sub><sup>+</sup>: 302.1727; found: 302.1731.

The structure of **Z-120b** has been determined by X-ray diffraction.

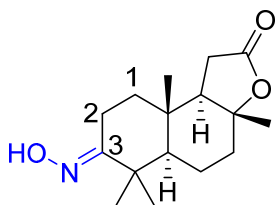

**(3aR,5aR,9aS,9bR,E)-7-(Hydroxyimino)-3a,6,6,9a-tetramethyldecahydronaphtho[2,1-b]furan-2(1H)-one (E-120c):**

**<sup>1</sup>H NMR** (400 MHz, CDCl<sub>3</sub>) δ (ppm): 3.09 (d, *J* = 14.0 Hz, 1H), 2.44 (t, *J* = 15.2 Hz, 1H), 2.36–2.20 (m, 2H), 2.10 (d, *J* = 12.0 Hz, 1H), 1.96–1.86 (m, 2H), 1.74–1.63 (m, 1H), 1.62–1.54 (m, 1H), 1.51–1.42 (m, 1H), 1.35 (s, 3H), 1.33–1.25 (m, 2H), 1.18 (s, 3H), 1.07 (s, 3H), 1.00 (s, 3H);

**<sup>13</sup>C NMR** (101 MHz, CDCl<sub>3</sub>) δ (ppm): 176.4, 165.3, 85.9, 58.5, 55.3, 40.3, 38.2, 37.3, 35.9, 28.7, 27.6, 22.8, 21.4, 21.0, 16.7, 14.6;

**HRMS (ESI):** *m/z* [M+Na]<sup>+</sup> calcd for C<sub>16</sub>H<sub>25</sub>NNaO<sub>3</sub><sup>+</sup>: 302.1727; found: 302.1730.

*The structures of compounds E-120a and Z-120b were assigned based on their X-ray structures; The structures of compound E-120b and E-120c were determined by hydrolysis to the corresponding ketone according to the literature-reported protocol below; spectra data matched with values reported in the literature.*<sup>117</sup>

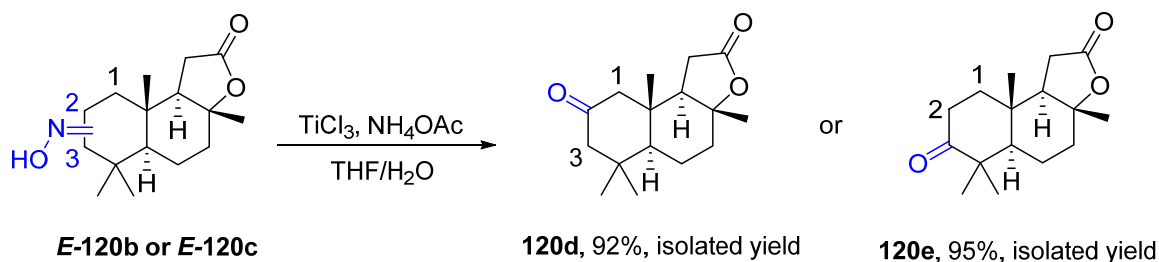

To a solution of *E*-120b or *E*-120c (27.9 mg, 0.10 mmol) in THF/H<sub>2</sub>O (4 mL/4 mL) were added NH<sub>4</sub>OAc (100.2 mg, 1.3 mmol) and a buffered solution of TiCl<sub>3</sub> (0.22 mL of aqueous HCl solution containing 15% TiCl<sub>3</sub>, 0.25 mmol). The mixture was stirred at rt for 10 h and then extracted with Et<sub>2</sub>O. The extract was washed with saturated aqueous NaHCO<sub>3</sub> solution and brine, dried over Na<sub>2</sub>SO<sub>4</sub>, filtered, and evaporated in vacuo to give a solid. The solid was purified by silica gel flash column chromatography (petroleum ether/EtOAc: 4/1) to give **120d** as white solid (24.3 mg, 92%) or **120e** as white solid (25.1 mg, 95%).

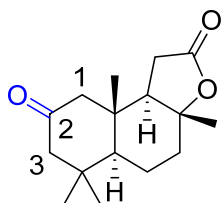

**(3a*R*,5a*S*,9a*S*,9b*R*)-3a,6,6,9a-tetramethyldecahydronaphtho[2,1-*b*]furan-2,8-dione (120d)** <sup>114</sup>:

<sup>1</sup>H NMR (400 MHz, CDCl<sub>3</sub>) δ (ppm): 2.42 (t, *J* = 16.4 Hz, 1H), 2.30–2.10 (m, 7H), 1.99 (d, *J* = 13.6 Hz, 1H), 1.77 (td, *J* = 12.4, 4.0 Hz, 1H), 1.67 (td, *J* = 12.8 Hz, 1H), 1.46 (q, *J* = 9.6 Hz, 1H), 1.32 (s, 3H), 1.06 (s, 3H), 0.90 (s, 3H); <sup>13</sup>C NMR (101 MHz, CDCl<sub>3</sub>) δ (ppm): 209.4, 175.7, 85.7, 58.2, 56.6, 55.7, 55.0, 40.4, 38.7, 38.2, 33.3, 28.6, 22.7, 21.2, 20.8, 16.2.

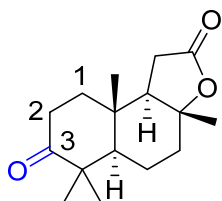

**(3a*R*,5a*R*,9a*S*,9b*R*)-3a,6,6,9a-tetramethyloctahydronaphtho[2,1-*b*]furan-2,7(1*H*,3a*H*)-dione (120e)** <sup>118</sup>:

<sup>1</sup>H NMR (400 MHz, CDCl<sub>3</sub>) δ (ppm): 2.61–2.51 (m, 1H), 2.50–2.41 (m, 2H), 2.26 (dd, *J* = 16.0, 6.4 Hz, 1H), 2.10 (dt, *J* = 12.0, 3.2 Hz, 1H), 1.98 (dd, *J* = 15.2, 6.4 Hz, 1H), 1.86–1.79 (m, 1H), 1.76–1.66 (m, 2H), 1.63–1.46 (m, 3H), 1.36 (s, 3H), 1.10 (s, 3H), 1.04 (s, 3H), 1.01 (s,

3H);  $^{13}\text{C}$  NMR (101 MHz,  $\text{CDCl}_3$ )  $\delta$  (ppm): 215.6, 176.0, 85.7, 58.2, 54.4, 47.4, 37.8, 37.7, 35.6, 33.5, 28.7, 26.7, 21.5, 21.2, 20.8, 14.6.

(3a*R*,5a*S*,9a*S*,9b*R*)-3a,6,6,9a-tetramethyldecahydronaphtho[2,1-*b*]furan-2,8-dione (120d), (3a*R*,5a*R*,9a*S*,9b*R*)-3a,6,6,9a-tetramethyloctahydronaphtho[2,1-*b*]furan-2,7(1*H*,3a*H*)-dione (120e), (3a*R*,5a*S*,9a*S*,9b*R*)-8-hydroxy-3a,6,6,9a-tetramethyldecahydronaphtho[2,1-*b*]furan-2(1*H*)-one (120f) and (3a*R*,5a*S*,9a*S*,9b*R*)-9-hydroxy-3a,6,6,9a-tetramethyldecahydronaphtho[2,1-*b*]furan-2(1*H*)-one (120g) were synthesized by the general procedure A from sclareolide (250.4 mg, 1.0 mmol, 1.0 equiv.) with the catalyst *rac*-C1 (7.9 mg, 1.0 mol%) but **without**  $(\text{NH}_2\text{OH})_2\cdot\text{H}_2\text{SO}_4$ . The residue was purified through flash column chromatography (gradient elution: Petroleum ether : EtOAc=10:1 to 4:1 to 3:1) to give the mixture of ketones 120d and 120e (135.0 mg, 51% yield, 120d: 120e = 2:1), and the alcohols 120f (51.0 mg, 19% yield) and 120g (8.0 mg, 3% yield).

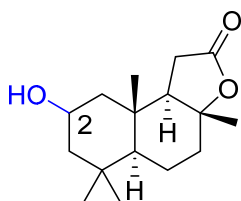

(3a*R*,5a*S*,9a*S*,9b*R*)-8-hydroxy-3a,6,6,9a-tetramethyldecahydronaphtho[2,1-*b*]furan-2(1*H*)-one (120f)<sup>57</sup>:  $^1\text{H}$  NMR (400 MHz,  $\text{CDCl}_3$ )  $\delta$  (ppm): 4.01–3.90 (m, 1H), 2.41 (t,  $J$  = 15.2 Hz, 1H), 2.24 (dd,  $J$  = 16.4, 6.4 Hz, 1H), 2.06 (dt,  $J$  = 12.0, 3.6 Hz, 1H), 1.98 (dd,  $J$  = 14.8, 6.4 Hz, 1H), 1.92–1.84 (m, 1H), 1.83–1.75 (m, 2H), 1.66 (td,  $J$  = 12.4, 4.0 Hz, 1H), 1.40–1.32 (m, 1H), 1.30 (s, 3H), 1.17–1.09 (m, 1H), 1.09–1.02 (m, 2H), 0.92 (s, 6H), 0.85 (s, 3H);  $^{13}\text{C}$  NMR (101 MHz,  $\text{CDCl}_3$ )  $\delta$  (ppm): 176.7, 86.3, 64.3, 58.9, 56.2, 51.4, 48.3, 38.5, 37.4, 34.8, 33.3, 28.8, 21.8, 21.7, 20.3, 16.2.

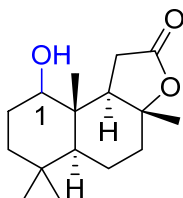

(3a*R*,5a*S*,9a*S*,9b*R*)-9-hydroxy-3a,6,6,9a-tetramethyldecahydronaphtho[2,1-*b*]furan-2(1*H*)-one (120g):  $^1\text{H}$  NMR (400 MHz,  $\text{CDCl}_3$ )  $\delta$  (ppm): 3.21 (dd,  $J$  = 6.0, 4.0 Hz, 1H), 2.83 (d,  $J$  = 3.6

Hz, 1H), 2.42 (t,  $J$  = 15.6 Hz, 1H), 2.23 (dd,  $J$  = 16.0, 6.4 Hz, 1H), 2.06 (dt,  $J$  = 12.0, 3.2 Hz, 1H), 1.88 (dd,  $J$  = 14.8, 6.4 Hz, 1H), 1.84–1.75 (m, 2H), 1.66 (td,  $J$  = 12.4, 4.0 Hz, 1H), 1.59 (s, 1H), 1.48 (d,  $J$  = 14.4 Hz, 1H), 1.43–1.32 (m, 2H), 1.31 (s, 3H), 1.26–1.22 (m, 1H), 1.13 (s, 3H), 1.03 (s, 3H), 0.94 (s, 3H);  $^{13}\text{C}$  NMR (101 MHz,  $\text{CDCl}_3$ )  $\delta$  (ppm): 176.4, 85.9, 61.7, 57.4, 52.0, 46.9, 39.7, 37.8, 35.0, 32.8, 28.5, 28.1, 21.5, 20.70, 20.65, 17.6.

**Methyl (1*R*,4*aS*,10*aR*,*E*)-9-(hydroxyimino)-7-(2-hydroxypropan-2-yl)-1,4*a*-dimethyl-1,2,3,4,4*a*,9,10,10*a*-octahydrophenanthrene-1-carboxylate** and **methyl (1*R*,4*aS*,10*aR*)-7-(2-hydroxypropan-2-yl)-1,4*a*-dimethyl-9-oxo-1,2,3,4,4*a*,9,10,10*a*-octahydrophenanthrene-1-carboxylate** were synthesized by the general Procedure **B** from methyl dehydroabietate (0.5 mmol, 125.2 mg, 1.0 equiv.) with the catalyst (*R,R*)-**C2** (7.9 mg, 2.0 mol%) or (*S,S*)-**C2** (7.9 mg, 2.0 mol%). The resulting reaction mixture was basified with  $\text{Na}_2\text{CO}_3$  for 0.5 h or 20 h at room temperature, and the crude product was purified by flash column chromatography (gradient elution: petroleum ether : EtOAc = 5:1 to 3:1) to afford **121a** and **121b**. The yields are shown in Table S-12.

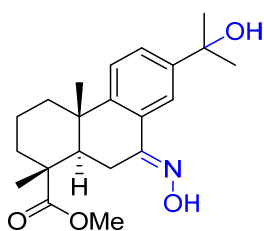

**Methyl (1*R*,4*aS*,10*aR*,*E*)-9-(hydroxyimino)-7-(2-hydroxypropan-2-yl)-1,4*a*-dimethyl-1,2,3,4,4*a*,9,10,10*a*-octahydrophenanthrene-1-carboxylate (**121a**):**  $^1\text{H}$  NMR (400 MHz,  $\text{CDCl}_3$ )  $\delta$  (ppm): 7.95 (s, 1H), 7.45 (d,  $J$  = 8.0 Hz, 1H), 7.24 (d,  $J$  = 8.0 Hz, 1H), 3.64 (s, 3H), 2.69–2.62 (m, 2H), 2.34–2.25 (m, 2H), 1.78–1.69 (m, 4H), 1.56 (s, 6H), 1.36 (s, 3H), 1.22–1.33 (m, 2H), 1.10 (s, 3H);  $^{13}\text{C}$  NMR (101 MHz,  $\text{CDCl}_3$ )  $\delta$  (ppm): 178.4, 155.7, 149.6, 147.1, 128.9, 126.2, 123.0, 120.4, 72.6, 52.3, 46.7, 41.7, 37.3, 37.2, 36.7, 31.7, 31.6, 24.0, 23.0, 18.2, 16.7; **HRMS (ESI):**  $m/z$   $[\text{M}+\text{Na}]^+$  calcd for  $\text{C}_{21}\text{H}_{29}\text{NNaO}_4^+$ : 382.1989; found: 382.1997.

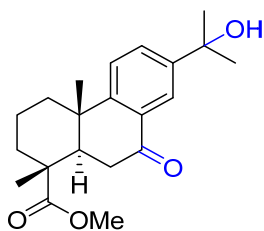



**Methyl (1*R*,4*aS*,10*aR*)-7-(2-hydroxypropan-2-yl)-1,4*a*-dimethyl-9-oxo-1,2,3,4,4*a*,9,10,10*a*-octahydrophenanthrene-1-carboxylate (121b):**  $^1\text{H}$  NMR (400 MHz,  $\text{CDCl}_3$ )  $\delta$  (ppm): 8.04 (s, 1H), 7.73 (d,  $J = 8.4$  Hz, 1H), 7.35 (d,  $J = 8.4$  Hz, 1H), 3.64 (s, 3H), 2.77–2.65 (m, 2H), 2.40–2.31 (m, 2H), 1.84–1.61 (m, 6H), 1.57 (s, 6H), 1.33 (s, 3H), 1.25 (s, 3H);  $^{13}\text{C}$  NMR (101 MHz,  $\text{CDCl}_3$ )  $\delta$  (ppm): 198.6, 177.9, 153.9, 147.5, 130.7, 130.6, 123.7, 123.3, 72.4, 52.4, 46.8, 43.8, 37.9, 37.5, 37.2, 36.6, 31.8, 31.7, 23.8, 18.2, 16.5; **HRMS (ESI):**  $m/z$   $[\text{M}+\text{Na}]^+$  calcd for  $\text{C}_{21}\text{H}_{28}\text{NaO}_4^+$ : 367.1880; found: 367.1875.

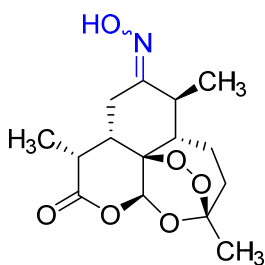

**(3*R*,5*aS*,6*S*,8*aS*,9*R*,12*S*,12*aR*)-7-(Hydroxyimino)-3,6,9-trimethyloctahydro-12*H*-3,12-epoxy [1,2]dioxepino[4,3-*i*]isochromen-10(3*H*)-one (122a)** was synthesized by the general procedure A (the solvent was changed to  $\text{CH}_3\text{CN}$ ) from (+)-artemisinin (141.2 mg, 0.50 mmol, 1.0 equiv.), hydroxylamine sulfate (164.2 mg, 1.0 mmol, 2.0 equiv.) and AcOH (1.4 mL) with the manganese catalyst (*R,R*)-**C1** (5.1 mg, 1.0 mol%), and purified (gradient elution: petroleum ether/EtOAc= 4:1 to 2:1) to give **122a** and remaining **122**. The collected starting material **122** was reused for oxidative oximation twice, with the amount of other reagents required based on the amount of **122** used each time. The amount/yield of **122a** and that of recovered **122** are shown in Table S-13. When (*S,S*)-**C1** (5.1 mg, 1.0 mol%) or (*R,R*)-**C2** (4.0 mg, 1.0 mol%) was used as catalyst, the procedure for the oxidative oximation of **122** was similar with the exception that the remaining **122** was not recycled.  $^1\text{H}$  NMR (400 MHz,  $\text{DMSO}-d_6$ )  $\delta$  (ppm): 10.87 (s, 1H), 6.47 (s, 1H), 3.48 (dd,  $J = 14.0, 4.8$  Hz, 1H), 3.24 (quint,  $J = 6.8$  Hz, 1H), 2.50–2.42 (m, 1H), 2.36 (td,  $J = 12.8, 3.2$  Hz, 1H), 2.20–2.12 (m, 1H), 2.09–2.01 (m, 1H), 1.92 (dt,  $J = 14.8, 4.8$  Hz, 1H), 1.66–1.56 (m, 2H), 1.45 (s, 3H), 1.37–1.27 (m, 1H), 1.16 (d,  $J = 7.2$  Hz, 3H), 1.13 (d,  $J = 7.2$  Hz, 3H);  $^{13}\text{C}$  NMR (101 MHz,  $\text{DMSO}-d_6$ )  $\delta$  (ppm): 170.9, 155.1, 104.6, 92.6, 78.7, 49.2, 41.8, 39.7, 35.1, 32.4, 24.7, 24.6, 20.1, 12.9, 12.1; **HRMS (ESI):**  $m/z$   $[\text{M}+\text{Na}]^+$  calcd for  $\text{C}_{15}\text{H}_{21}\text{NNaO}_6^+$ : 334.1261; found: 334.1269.

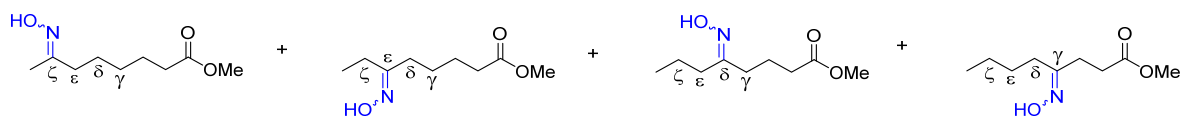

**Methyl 7-(hydroxyimino)octanoate (123a-ζ-oxime), methyl 6-(hydroxyimino)octanoate (123a-ε-oxime), methyl 5-(hydroxyimino)octanoate (123a-δ-oxime) and methyl 4-(hydroxyimino)octanoate (123a-γ-oxime) (123a)** were synthesized by the general procedure A from methyl octanoate (158.2 mg, 1 mmol) and purified by flash column chromatography on silica gel (gradient elution: petroleum ether : EtOAc = 10:1 to 4:1) to afford the product **123a-ζ-oxime**, **123a-ε-oxime**, **123a-δ-oxime** and **123a-γ-oxime** (129.2 mg, 69% yield) as a mixture of four regioisomers with *E/Z* isomerism (Table S-10 and Fig. S-6).

**Yield**, 129.2 mg, 69%; ζ, 35%; γ+δ+ε=34%; colorless oil;

**HRMS** (ESI<sup>+</sup>): *m/z* [M+Na]<sup>+</sup> calculated for C<sub>9</sub>H<sub>17</sub>NNaO<sub>3</sub><sup>+</sup>: 210.1101. found 210.1106.

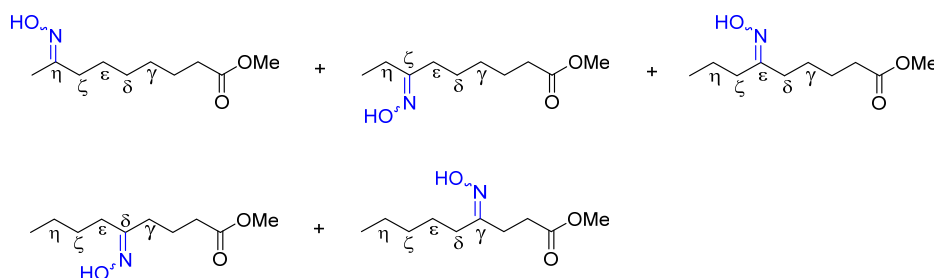

**Methyl 8-(hydroxyimino)nonanoate (124a-η-oxime), methyl 7-(hydroxyimino)nonanoate (124a-ζ-oxime), methyl 6-(hydroxyimino)nonanoate (124a-ε-oxime), methyl 5-(hydroxyimino)nonanoate (124a-δ-oxime), and methyl 4-(hydroxyimino)nonanoate (124a-γ-oxime) (124a)** were synthesized by the general **Procedure A** from methyl nonanoate (172.3 mg, 1 mmol) and purified by flash column chromatography on silica gel (gradient elution: petroleum ether : EtOAc = 10:1 to 4:1) to afford the product **124a-η-oxim**, **124a-ζ-oxime**, **124a-ε-oxime**, **124a-δ-oxime** and **124a-γ-oxime** (120.8 mg, 60% yield) as a mixture of five regioisomers with *E/Z* isomerism (Table S-10 and Fig. S-6).

**Yield**, 120.8 mg, 60%; η, 20%; γ+δ+ε+ζ=40%; colorless oil;

**HRMS** (ESI<sup>+</sup>): *m/z* [M+Na]<sup>+</sup> calculated for C<sub>10</sub>H<sub>19</sub>NNaO<sub>3</sub><sup>+</sup>: 224.1257. found 224.1256.

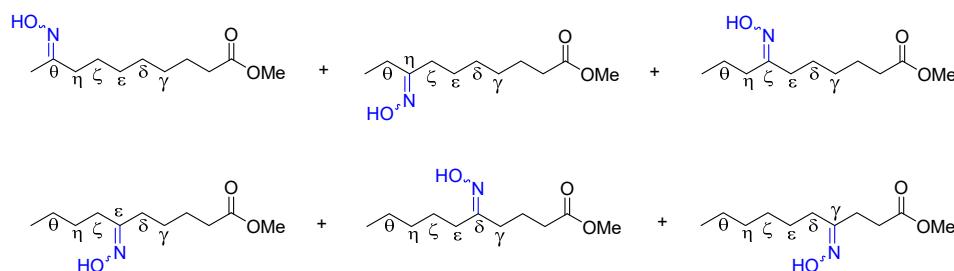

**Methyl 9-(hydroxyimino)decanoate (125a- $\theta$ -oxime), methyl 8-(hydroxyimino)decanoate (125a- $\eta$ -oxime), methyl 9-(hydroxyimino)decanoate (125a- $\zeta$ -oxime), methyl 9-(hydroxyimino)decanoate (125a- $\epsilon$ -oxime), methyl 9-(hydroxyimino)decanoate (125a- $\delta$ -oxime), and methyl 9-(hydroxyimino)decanoate (125a- $\gamma$ -oxime) (125a)** were synthesized by the general Procedure A from methyl decanoate (186.3 mg, 1 mmol) and purified by flash column chromatography on silica gel (gradient elution: petroleum ether : EtOAc = 10:1 to 4:1) to afford the product **125a- $\theta$ -oxime**, **125a- $\eta$ -oxim**, **125- $\zeta$ -oxime**, **125a- $\epsilon$ -oxime**, **125a- $\delta$ -oxime** and **125a- $\gamma$ -oxime** (137.8 mg, 64%yield) as a mixture of six regioisomers with *E/Z* isomerism (Table S-10 and Fig. S-6).

**Yield**, 137.8 mg, 64%;  $\theta$ , 21%;  $\gamma+\delta+\epsilon+\zeta+\eta=43\%$ ; colorless oil;

**HRMS** (ESI<sup>+</sup>): *m/z* [M+Na]<sup>+</sup> calculated for C<sub>11</sub>H<sub>21</sub>NNaO<sub>3</sub><sup>+</sup>: 238.1414. found 238.141

### 13. X-ray structures and crystallographic data

Crystals of *rac*-C1, *meso*-C1 and *rac*-C2 suitable for single crystal X-ray structure analysis were obtained from dry CH<sub>3</sub>CN/CH<sub>2</sub>Cl<sub>2</sub> under an N<sub>2</sub> atmosphere. Crystals of *E*-22a- $\delta$ -oxime, *E*-65a, 2*E*, 4*E*-119a, *E*-120a, Z-120b were obtained from dry CHCl<sub>3</sub>/Et<sub>2</sub>O.

Reflections were collected on a Bruker Smart Apex II diffractometer using monochromated MoK $\alpha$  ( $\lambda$  = 0.71073 Å) or CuK $\alpha$  ( $\lambda$  = 1.54178 Å) radiation. All structures were refined against *F*<sup>2</sup> with full-matrix least-squares using the SHELX program <sup>119</sup>. Non-hydrogen atoms were refined anisotropically except those of some disordered groups. H-atoms were fixed in geometrical positions. Disordered atom positions were split on two positions and refined with restraints. Crystallographic data are listed in Table S-15; structure diagrams with ellipsoids are shown in Figures S19 – S26.

Crystallographic data can be obtained free of charge from The Cambridge Crystallographic Data Centre ([www.ccdc.cam.ac.uk/structures](http://www.ccdc.cam.ac.uk/structures)); deposition numbers are as follows: ***rac*-C1** (CCDC 2372363); ***meso*-C1** (CCDC 2372362); ***rac*-C2** (CCDC 2372364); ***E*-22a- $\delta$ -oxime** (CCDC 2372355); ***E*-65a** (CCDC 2372353); ***2E,4E*-119a** (CCDC 2372356); ***E*-120a** (CCDC 2372360); ***Z*-120b** (CCDC 2372361)

**Table S-15.** Crystallographic data.

|                                             | <i>rac</i> -C1                                                                                                | <i>meso</i> -C1                                                                                                               | <i>rac</i> -C2                                                                                |
|---------------------------------------------|---------------------------------------------------------------------------------------------------------------|-------------------------------------------------------------------------------------------------------------------------------|-----------------------------------------------------------------------------------------------|
| Empirical formula                           | C <sub>42</sub> H <sub>74</sub> F <sub>6</sub> MnN <sub>4</sub> O <sub>8</sub> S <sub>2</sub> Si <sub>2</sub> | C <sub>43</sub> H <sub>68</sub> Cl <sub>2</sub> F <sub>6</sub> MnN <sub>4</sub> O <sub>6</sub> S <sub>2</sub> Si <sub>2</sub> | C <sub>28</sub> H <sub>38</sub> F <sub>6</sub> MnN <sub>4</sub> O <sub>8</sub> S <sub>2</sub> |
| Formula weight                              | 1052.29                                                                                                       | 1097.15                                                                                                                       | 791.68                                                                                        |
| Temperature/K                               | 183                                                                                                           | 254                                                                                                                           | 200                                                                                           |
| Crystal system                              | monoclinic                                                                                                    | orthorhombic                                                                                                                  | trigonal                                                                                      |
| Space group                                 | P2 <sub>1</sub>                                                                                               | Fdd2                                                                                                                          | P3 <sub>1</sub> 21                                                                            |
| a/Å                                         | 15.293(2)                                                                                                     | 16.9400(15)                                                                                                                   | 12.7597(5)                                                                                    |
| b/Å                                         | 12.0168(17)                                                                                                   | 20.3528(17)                                                                                                                   | 12.7597(5)                                                                                    |
| c/Å                                         | 16.775(2)                                                                                                     | 32.126(3)                                                                                                                     | 22.1630(10)                                                                                   |
| $\alpha/^\circ$                             | 90                                                                                                            | 90                                                                                                                            | 90                                                                                            |
| $\beta/^\circ$                              | 93.547(5)                                                                                                     | 90                                                                                                                            | 90                                                                                            |
| $\gamma/^\circ$                             | 90                                                                                                            | 90                                                                                                                            | 120                                                                                           |
| Volume/Å <sup>3</sup>                       | 3076.8(7)                                                                                                     | 11076.3(16)                                                                                                                   | 3124.9(3)                                                                                     |
| Z                                           | 2                                                                                                             | 8                                                                                                                             | 3                                                                                             |
| $\rho_{\text{calc}}/\text{cm}^3$            | 1.136                                                                                                         | 1.316                                                                                                                         | 1.262                                                                                         |
| $\mu/\text{mm}^{-1}$                        | 0.382                                                                                                         | 0.519                                                                                                                         | 0.487                                                                                         |
| F(000)                                      | 1114                                                                                                          | 4600                                                                                                                          | 1227                                                                                          |
| Radiation                                   | MoK $_{\alpha}$                                                                                               | MoK $_{\alpha}$                                                                                                               | MoK $_{\alpha}$                                                                               |
| $2\Theta_{\text{max}}/^\circ$               | 52.91                                                                                                         | 52.92                                                                                                                         | 52.72                                                                                         |
| R <sub>int</sub>                            | 0.0816                                                                                                        | 0.0870                                                                                                                        | 0.0493                                                                                        |
| R <sub>sigma</sub>                          | 0.0538                                                                                                        | 0.0421                                                                                                                        | 0.0292                                                                                        |
| Data/restraints/parameters                  | 12590/984/685                                                                                                 | 5714/1328/421                                                                                                                 | 4248/184/261                                                                                  |
| Goodness-of-fit on F <sup>2</sup>           | 1.051                                                                                                         | 1.125                                                                                                                         | 1.059                                                                                         |
| R <sub>1</sub> [ $I \geq 2\sigma(I)$ ]      | 0.0452                                                                                                        | 0.0809                                                                                                                        | 0.0447                                                                                        |
| wR <sub>2</sub> [all data]                  | 0.119                                                                                                         | 0.229                                                                                                                         | 0.132                                                                                         |
| Largest diff. peak/hole / e Å <sup>-3</sup> | 0.52/-0.48                                                                                                    | 0.33/-0.29                                                                                                                    | 0.25/-0.32                                                                                    |
| Flack parameter                             | 0.04(2)                                                                                                       | 0.11(6)                                                                                                                       | 0.02(3)                                                                                       |

**Table S-15** (continued)

|                                             | <b><i>E</i>-65a</b>                           | <b><i>E</i>-22a-<math>\delta</math>-oxime</b>                                 |
|---------------------------------------------|-----------------------------------------------|-------------------------------------------------------------------------------|
| Empirical formula                           | C <sub>7</sub> H <sub>9</sub> NO <sub>3</sub> | C <sub>16</sub> H <sub>17</sub> Cl <sub>3</sub> N <sub>2</sub> O <sub>3</sub> |
| Formula weight                              | 155.15                                        | 391.66                                                                        |
| Temperature/K                               | 200                                           | 200                                                                           |
| Crystal system                              | monoclinic                                    | triclinic                                                                     |
| Space group                                 | P2 <sub>1</sub> /n                            | P-1                                                                           |
| a/Å                                         | 5.1473(2)                                     | 5.3661(2)                                                                     |
| b/Å                                         | 23.0631(7)                                    | 12.4165(6)                                                                    |
| c/Å                                         | 6.4170(2)                                     | 15.0110(7)                                                                    |
| $\alpha$ /°                                 | 90                                            | 110.102(2)                                                                    |
| $\beta$ /°                                  | 108.3150(10)                                  | 99.083(2)                                                                     |
| $\gamma$ /°                                 | 90                                            | 98.164(2)                                                                     |
| Volume/Å <sup>3</sup>                       | 723.19(4)                                     | 906.44(7)                                                                     |
| Z                                           | 4                                             | 2                                                                             |
| $\rho_{\text{calc}}$ /cm <sup>3</sup>       | 1.425                                         | 1.435                                                                         |
| $\mu$ /mm <sup>-1</sup>                     | 0.951                                         | 0.522                                                                         |
| F(000)                                      | 328                                           | 404                                                                           |
| Radiation                                   | CuK $\alpha$                                  | MoK $\alpha$                                                                  |
| 2 $\Theta_{\text{max}}$ /°                  | 136.47                                        | 52.83                                                                         |
| R <sub>int</sub>                            | 0.0373                                        | 0.0618                                                                        |
| R <sub>sigma</sub>                          | 0.0192                                        | 0.0346                                                                        |
| Data/restraints/parameters                  | 1321/0/118                                    | 3710/156/255                                                                  |
| Goodness-of-fit on F <sup>2</sup>           | 1.060                                         | 1.042                                                                         |
| R <sub>1</sub> [ $I \geq 2\sigma(I)$ ]      | 0.0336                                        | 0.0786                                                                        |
| wR <sub>2</sub> [all data]                  | 0.0911                                        | 0.2393                                                                        |
| Largest diff. peak/hole / e Å <sup>-3</sup> | 0.23/-0.15                                    | 0.78/-0.67                                                                    |

**Table S-15** (continued)

|                                             | <b>2E,4E-119a</b>                                             | <b>E-120a</b>                                   | <b>Z-120b</b>                                   |
|---------------------------------------------|---------------------------------------------------------------|-------------------------------------------------|-------------------------------------------------|
| Empirical formula                           | C <sub>12</sub> H <sub>20</sub> N <sub>2</sub> O <sub>4</sub> | C <sub>16</sub> H <sub>25</sub> NO <sub>3</sub> | C <sub>16</sub> H <sub>25</sub> NO <sub>3</sub> |
| Formula weight                              | 256.30                                                        | 279.37                                          | 279.37                                          |
| Temperature/K                               | 250                                                           | 200                                             | 200                                             |
| Crystal system                              | orthorhombic                                                  | monoclinic                                      | orthorhombic                                    |
| Space group                                 | P2 <sub>1</sub> 2 <sub>1</sub> 2                              | P2 <sub>1</sub>                                 | P2 <sub>1</sub> 2 <sub>1</sub> 2 <sub>1</sub>   |
| a/Å                                         | 10.8793(5)                                                    | 7.1240(4)                                       | 8.2569(3)                                       |
| b/Å                                         | 13.4197(6)                                                    | 20.9383(12)                                     | 13.3839(4)                                      |
| c/Å                                         | 10.0807(4)                                                    | 15.5395(8)                                      | 14.1988(4)                                      |
| $\alpha/^\circ$                             | 90                                                            | 90                                              | 90                                              |
| $\beta/^\circ$                              | 90                                                            | 99.396(2)                                       | 90                                              |
| $\gamma/^\circ$                             | 90                                                            | 90                                              | 90                                              |
| Volume/Å <sup>3</sup>                       | 1471.75(11)                                                   | 2286.8(2)                                       | 1569.10(9)                                      |
| Z                                           | 4                                                             | 6                                               | 4                                               |
| $\rho_{\text{calc}}/\text{g}/\text{cm}^3$   | 1.157                                                         | 1.217                                           | 1.183                                           |
| $\mu/\text{mm}^{-1}$                        | 0.721                                                         | 0.083                                           | 0.081                                           |
| F(000)                                      | 552                                                           | 912                                             | 608                                             |
| Radiation                                   | CuK $_{\alpha}$                                               | MoK $_{\alpha}$                                 | MoK $_{\alpha}$                                 |
| $2\Theta_{\text{max}}/^\circ$               | 136.54                                                        | 52.98                                           | 52.75                                           |
| R <sub>int</sub>                            | 0.0593                                                        | 0.1128                                          | 0.0820                                          |
| R <sub>sigma</sub>                          | 0.0339                                                        | 0.0931                                          | 0.0313                                          |
| Data/restraints/parameters                  | 2656/336/172                                                  | 9367/49/556                                     | 3209/0/186                                      |
| Goodness-of-fit on F <sup>2</sup>           | 1.061                                                         | 1.012                                           | 1.072                                           |
| R <sub>1</sub> [ $I \geq 2\sigma(I)$ ]      | 0.0551                                                        | 0.0874                                          | 0.0388                                          |
| wR <sub>2</sub> [all data]                  | 0.1540                                                        | 0.2603                                          | 0.1066                                          |
| Largest diff. peak/hole / e Å <sup>-3</sup> | 0.44/-0.19                                                    | 0.84/-0.44                                      | 0.17/-0.22                                      |
| Flack parameter                             | 0.09(10)                                                      | 0.3(10)                                         | -1.4(5)                                         |

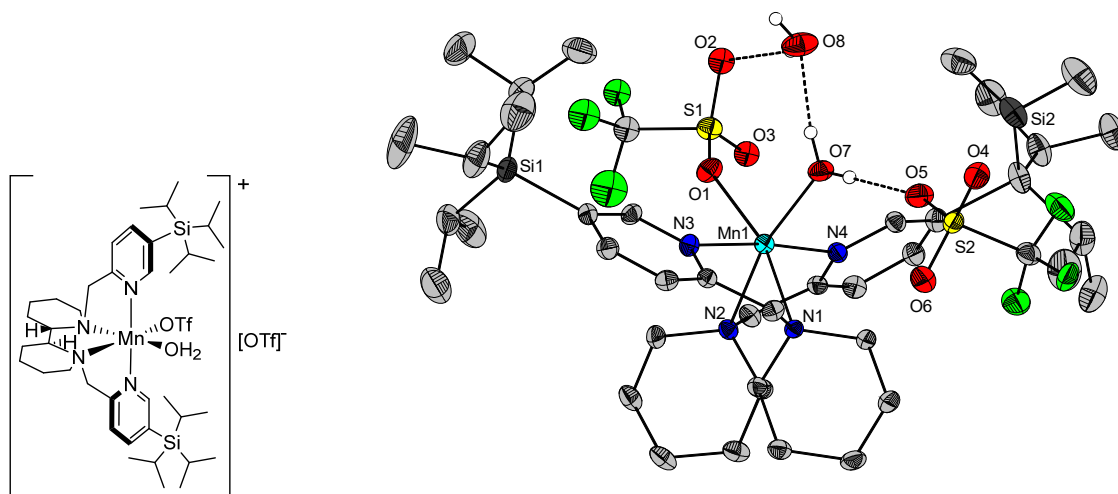

**Figure S-19.** Crystal structure of *rac*-C1. One triflate (S1) and one (iPr)<sub>3</sub>Si group (Si2) are disordered and were split over two positions; only one moiety is shown. Hydrogen atoms have been omitted for clarity (except those involved in hydrogen bonding). Thermal ellipsoids at 30% probability.

**Table S-16.** Selected bond lengths and angles of *rac*-C1:

|     |    |          |
|-----|----|----------|
| Mn1 | O1 | 2.171(3) |
| Mn1 | O7 | 2.172(3) |
| Mn1 | N3 | 2.214(3) |
| Mn1 | N4 | 2.218(3) |
| Mn1 | N1 | 2.274(3) |
| Mn1 | N2 | 2.299(3) |

|    |     |    |            |
|----|-----|----|------------|
| O1 | Mn1 | O7 | 91.36(13)  |
| O1 | Mn1 | N3 | 90.11(12)  |
| O7 | Mn1 | N3 | 91.98(14)  |
| O1 | Mn1 | N4 | 92.80(12)  |
| O7 | Mn1 | N4 | 92.57(13)  |
| N3 | Mn1 | N4 | 174.53(13) |
| O1 | Mn1 | N1 | 164.37(12) |
| O7 | Mn1 | N1 | 96.54(12)  |
| N3 | Mn1 | N1 | 76.20(13)  |
| N4 | Mn1 | N1 | 100.26(13) |
| O1 | Mn1 | N2 | 95.75(13)  |
| O7 | Mn1 | N2 | 166.31(12) |
| N3 | Mn1 | N2 | 99.66(13)  |
| N4 | Mn1 | N2 | 75.45(12)  |
| N1 | Mn1 | N2 | 79.46(12)  |



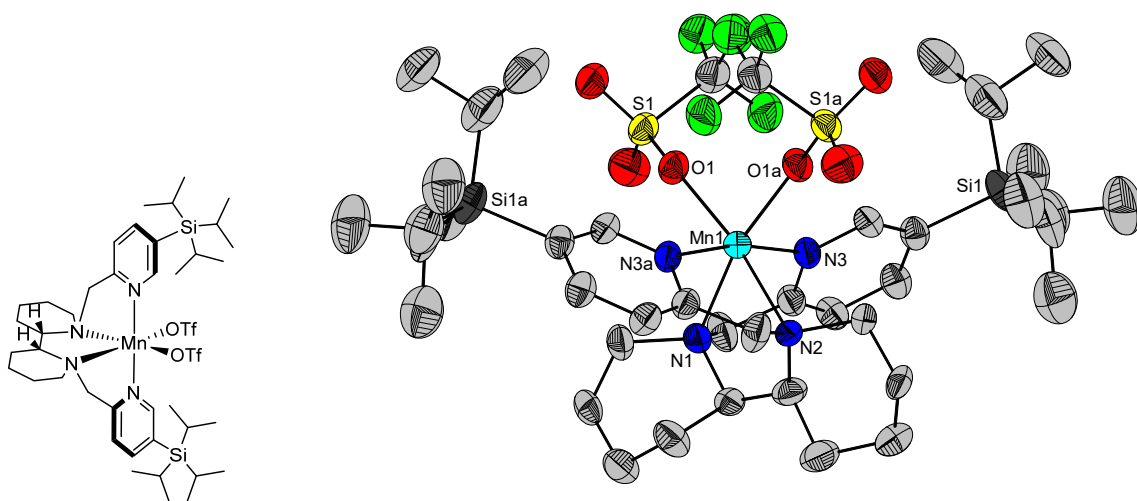

**Figure S-20.** Crystal structure of *meso*-C1. The triflate and the (iPr)<sub>3</sub>Si group are disordered. The bipiperidine unit of the ligand is disordered by symmetry of the crystallographic 2-fold axis. All disordered atoms were split over two positions; only one moiety is shown. Hydrogen atoms and a disordered dichloromethane molecule have been omitted for clarity. Thermal ellipsoids at 30% probability.

**Table S-17.** Selected bond lengths and angles of *meso*-C1 (these must be treated with caution due to the disorder of the bipiperidine section of the ligand):

|     |    |           |     |     |     |          |
|-----|----|-----------|-----|-----|-----|----------|
| Mn1 | N1 | 2.37(3)   | N2  | Mn1 | N1  | 80.0(4)  |
| Mn1 | N2 | 2.29(3)   | N3a | Mn1 | N1  | 98.4(7)  |
| Mn1 | N3 | 2.213(7)  | N3  | Mn1 | N1  | 73.7(7)  |
| Mn1 | O1 | 2.131(12) | N3a | Mn1 | N2  | 79.0(6)  |
|     |    |           | N3  | Mn1 | N2  | 93.2(6)  |
|     |    |           | N3  | Mn1 | N3a | 169.9(4) |
|     |    |           | O1a | Mn1 | N1  | 164.4(9) |
|     |    |           | O1  | Mn1 | N1  | 98.4(8)  |
|     |    |           | O1a | Mn1 | N2  | 97.0(7)  |
|     |    |           | O1  | Mn1 | N2  | 169.8(8) |
|     |    |           | O1a | Mn1 | N3  | 91.3(6)  |
|     |    |           | O1  | Mn1 | N3  | 96.0(6)  |
|     |    |           | O1  | Mn1 | O1a | 87.2(11) |

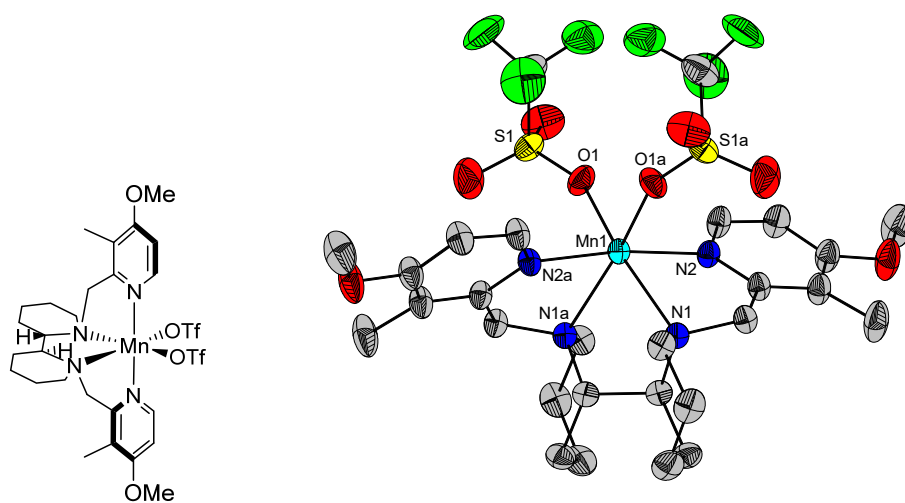

**Figure S-21.** Crystal structure of *rac*-C1. The CF<sub>3</sub> group of the triflate is disordered and was split over two positions; only one moiety is shown. Hydrogen atoms have been omitted for clarity. Thermal ellipsoids at 30% probability.

**Table S-18.** Selected bond lengths and angles of *rac*-C2:

|     |    |          |
|-----|----|----------|
| Mn1 | N1 | 2.294(3) |
| Mn1 | N2 | 2.212(3) |
| Mn1 | O1 | 2.162(3) |

|     |     |     |            |
|-----|-----|-----|------------|
| N1  | Mn1 | N1a | 79.68(16)  |
| N2a | Mn1 | N1  | 99.67(12)  |
| N2  | Mn1 | N1  | 74.60(11)  |
| N2a | Mn1 | N2  | 172.71(19) |
| O1  | Mn1 | N1  | 161.56(12) |
| O1a | Mn1 | N1  | 95.04(13)  |
| O1a | Mn1 | N2  | 95.86(13)  |
| O1  | Mn1 | N2  | 89.07(12)  |
| O1  | Mn1 | O1a | 95.1(2)    |

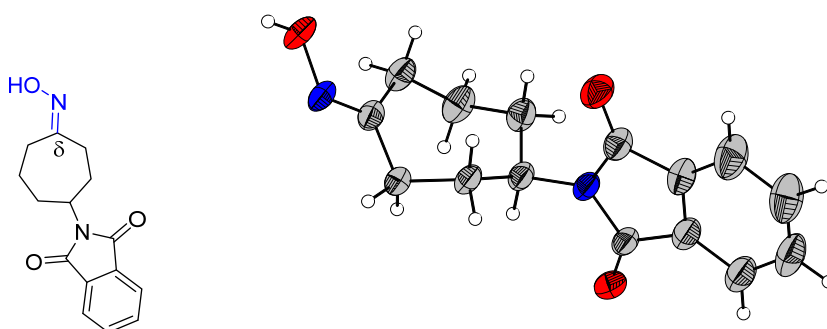

**Figure S-22.** Crystal structure of *E*-22a- $\delta$ -oxime. Thermal ellipsoids at 50% probability. There is also one chloroform molecule per formula unit which is disordered (not shown here).

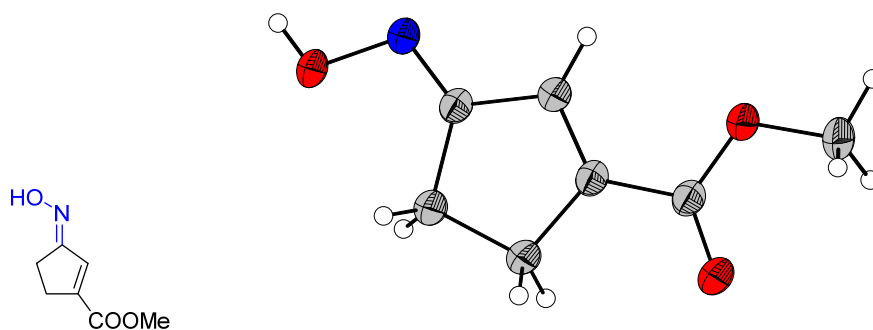

**Figure S-23.** Crystal structure of *E*-65a. Thermal ellipsoids at 50% probability.

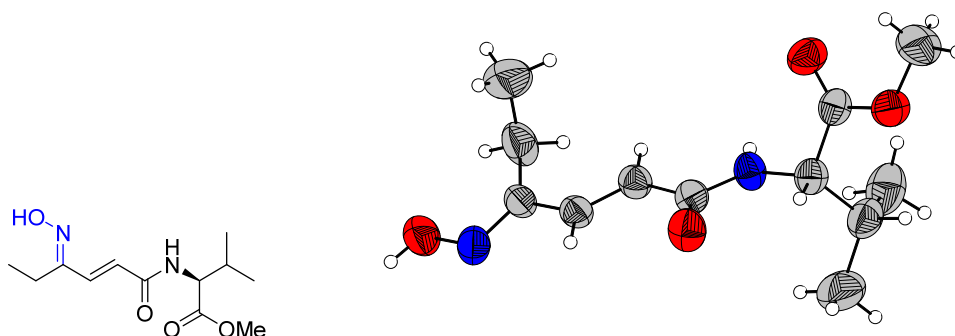

**Figure S-24.** Crystal structure of 2*E*,4*E*-119a. Thermal ellipsoids at 50% probability.

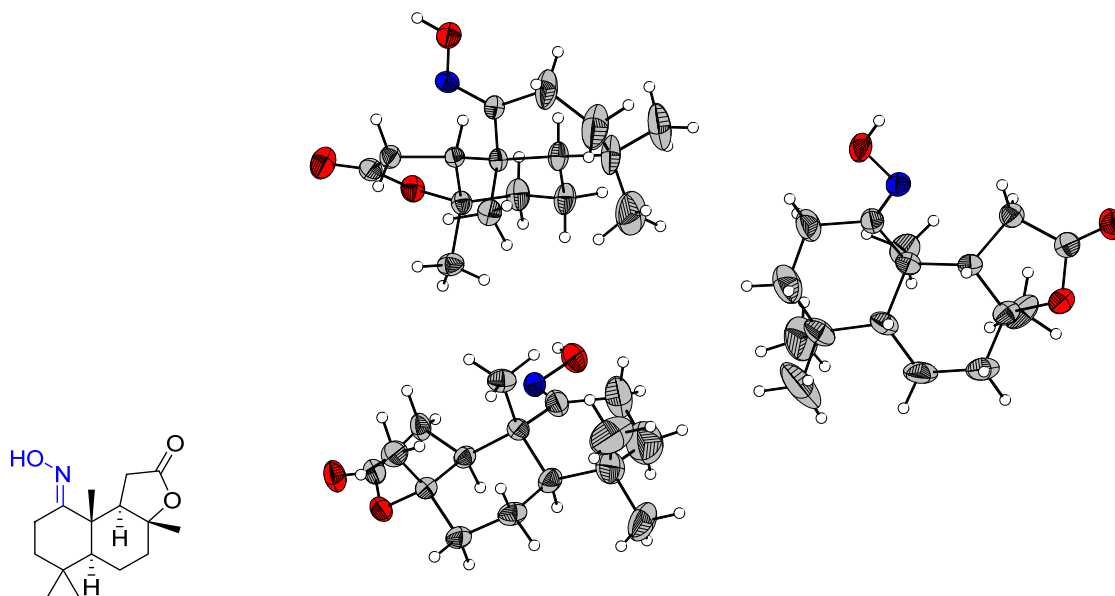

**Figure S-25.** Crystal structure of *E*-120a showing the three crystallographically independent molecules. Thermal ellipsoids at 50% probability.

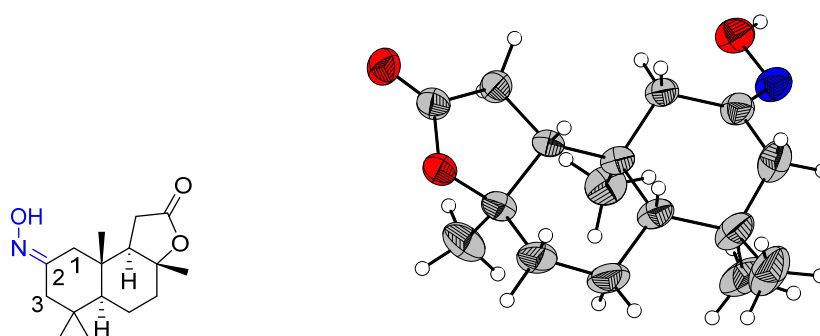

**Figure S-26.** Crystal structure of *Z*-120b. Thermal ellipsoids at 50% probability.

## 14. References

1. Richards, D. M. & Heel, R. C. *Drugs* **29**, 281–329 (1985).
2. Brogden, R. N., Heel, R. C., Speight, T. M. & Avery, G. S. *Drugs* **17**, 233–266 (1979).
3. Scott, L. J., Ormrod, D., K. & Goa, L. *Drugs* **61**, 143–266 (1979).
4. Brogden, R. N. & Campoli-Richards, D. M. *Drugs* **38**, 524–550 (1989).
5. Perry, C. & Scott, L. *Drugs* **64**, 1433–1464 (2004).
6. Tsuchiya, K., Kondo, M., Kida, M., Nakao, M., Iwahi, T., Nishi, T., Noji, Y., Takeuchi, M. & Nozaki, Y. *Antimicrob. Agents Chemother.* **19**, 56–65 (1981).
7. Bryson, H. M. & Brogden, R. N. *Drugs* **45**, 589–621 (1993).
8. Borin, M. T. *Drugs* **42**, 13–21 (1991).
9. Chapman, T. M. & Perry, C. M. *Am. J. Respir. Med.* **2**, 75–107 (2003).
10. Kelly, P. J., Fisher, M., Lucas, H. & Krecek, R. C. *Vet. Parasitol.* **156**, 358–360 (2008).
11. McGuire, J. L., Phillips, A., Hahn, D. W., Tolman, E. L., Flor, S. & Kafrissen, M. E. *Am. J. Obstet. Gynecol.* **163**, 2127–2131 (1990).
12. Abrams, L. S., Skee, D. M., Wong, F. A., Anderson, N. J. & Leese, P. T. *J Clin Pharmacol* **41**, 1232–1237 (2001).
13. Gheorghide, M., Blair, J. E., Filippatos, G. S., Macarie, C., Ruzyllo, W., Korewicki, J., Bubenek-Turconi, S. I., Ceracchi, M., Bianchetti, M., Carminati, P., et al. *J. Am. Coll. Cardiol.* **51**, 2276–2285 (2008).
14. Faustino, C., Serafim, C., Rijo, P. & Reis, C. P. *Expert Opin. Drug Deliv.* **13**, 1133–1148 (2016).
15. Perucca, E., Gatti, G. & Spina, E. *Clin. Pharmacokinet.* **27**, 175–190 (1994).
16. Green, M. D., Talbot, B. G. & Clark, C. R. *Life Sci.* **39**, 2263–2269 (1986).
17. Meijer, L., Skaltsounis, A. L., Magiatis, P., Polychronopoulos, P., Knockaert, M., Leost, M., Ryan, X. P., Vonica, C. A., Brivanlou, A., Dajani, R., Crovace, C., Tarricone, C., Musacchio, A., Roe, S. M., Pearl, L. & Greengard, P. *Chemistry & Biology* **10**, 1255–1266 (2003).
18. Chen, X., Yang, L., Oppenheim, J. J. & Howard, M. Z. *Phytother. Res.* **16**, 199–209 (2002).
19. Haack, T., Kurtkaya, S., Snyder, J. P. & Georg, G. I. *Org. Lett.* **5**, 5019–5022 (2003).
20. Shen, R., Lin, C. T., Bowman, E. J., Bowman, B. J. & Porco, J. A. *J. Am. Chem. Soc.* **125**, 7889–7901 (2003).
21. Dekker, K. A., Aiello, R. J., Hirai, H., Inagaki, T., Sakakibara, T., Suzuki, Y., Thompson, J.

- F., Yamauchi, Y. & Kojima, N. *J. Antibiot.* **51**, 14–20 (1998).
22. Katakawa, K., Kitajima, M., Aimi, N., Seki, H., Yamaguchi, K., Furihata, K., Harayama, T. & Takayama, H. *J. Org. Chem.* **70**, 658–663 (2005).
  23. Paciorek, J., Höfler, D., Sokol, K. R., Wurst, K. & Magauer, T. *J. Am. Chem. Soc.* **144**, 19704–19708 (2022).
  24. Fattorusso, E., Minale, L., Sodano, G., Moody, K. & Thomson, R. H. *J. Chem. Soc. D.* 752–753 (1970).
  25. Anderson, Z. J. & Fox, D. J. *Org. Biomol. Chem.* **14**, 1450–1454 (2016).
  26. Carney, J. R., Scheuer, P. J. & Kelly-Borges, M. *J. Nat. Prod.* **56**, 153–157 (1993).
  27. Wu, H., Nakamura, H., Kobayashi, J., Ohizumi, Y. & Hirata, Y. *Experientia* **42**, 855–856 (1986).
  28. Tabudravu, J. N., Eijsink, V. G., Gooday, G. W., Jaspars, M., Komander, D., Legg, M., Synstad, B. & van Aalten, D. M. *Bioorg. Med. Chem.* **10**, 1123–1128 (2002).
  29. Nebbioso, A., Pereira, R., Khanwalkar, H., Matarese, F., García-Rodríguez, J., Miceli, M., Logie, C., Kedinger, V., Ferrara, F., Stunnenberg, H. G., et al. *Mol. Cancer Ther.* **10**, 2394–2404 (2011).
  30. Dahlhoff, G., Niederer, J. P. M. & Hoelderich, W. F. *Catal. Rev.: Sci. Eng.* **43**, 381–441 (2001).
  31. Thomas, J. M. & Raja, R. *Proc. Natl. Acad. Sci. U. S. A.* **102**, 13732–13736 (2005).
  32. Kumar, R., Shah, S., Das, P. P., Bhagavanbhai, G. G. K., Al Fatesh, A. & Chowdhury, B. *Catal. Rev.* **61**, 516–594 (2019).
  33. Wang, H., Qin, M., Wu, Q., Cheng, D., Meng, X., Wang, L. & Xiao, F. *Ind. Eng. Chem. Res.* **62**, 2217–2224 (2023).
  34. Ritz, J., Fuchs, H., Kieczka, H. & Moran, W. C. In *Ullmann's Encyclopedia of Industrial Chemistry*; John Wiley & Sons Ltd.: Chichester, UK, (2011).
  35. Bashkirov, A. N., et al. *Neftekhimiya* **1**, 527–534 (1961).
  36. Griehl, W. & Ruestem, D. *Ind. Eng. Chem.* **62**, 16–22 (1970).
  37. Barton, D. H. R. & Chavasiri, W. *Tetrahedron* **50**, 19–30 (1994).
  38. Ishii, Y., Iwahama, T., Sakaguchi, S., Nakayama, K. & Nishiyama, Y. *J. Org. Chem.* **61**, 4520–4526 (1996).
  39. Baucherel, X., Arends, I. W. C. E., Ellwood, S. & Sheldon, R. A. *Org. Process Res. Dev.* **7**, 426–428 (2003).

40. Feng, Q., Yuan, D. K., Wang, D. Q., Liang, X. M., Zhang, J. J., Wu, J. P. & Chen, F. H. *Green Sust. Chem.* **1**, 63-69 (2011).
41. Weissermel, A. H. J. *Industrial Organic Chemistry*, 4th ed.; Wiley-VCH Verlag GmbH & Co. KGaA: Weinheim, (2003).
42. Nikl, J., Hofman, K., Mossazghi, S., Möller, I. C., Mondeshki, D., Weinelt, F., Baumann, F. E. & Waldvogel, S. R. *Nat. Commun.* **14**, 4565 (2023).
43. Baucherel, X., Arends, I. W. C. E., Ellwood, S. & Sheldon, R. A. *Org. Process Res. Dev.* **7**, 426–428 (2003).
44. Han, J., Tan, L., Wan, Y., Li, G. & Anderson, S. N. *Dalton Trans.* **51**, 11620–11624 (2022).
45. Wang, W., Xu, D., Sun, Q. & Sun, W. *Chem. Asian J.* **13**, 2458–2464 (2018).
46. Chen, M. S. & White, M. C. *Science* **318**, 783–787 (2007).
47. Gómez, L., Bosch, I. G., Company, A., Benet-Buchholz, J., Polo, A., Sala, X., Ribas, X. & Costas, M. *Angew. Chem. Int. Ed.* **48**, 5720–5723 (2009).
48. Sisti, S., Galeotti, M., Scarchilli, F., Salamone, M., Costas, M. & Bietti, M. *J. Am. Chem. Soc.* **145**, 22086–22096 (2023).
49. Chen, M. S. & White, M. C. *Science* **327**, 566–571 (2010).
50. Milan, M., Bietti, M. & Costas, M. *ACS Cent. Sci.* **3**, 196–204 (2017).
51. Kawamata, Y., Yan, M., Liu, Z., Bao, D. H., Chen, J., Starr, J. T. & Baran, P. S. *J. Am. Chem. Soc.* **139**, 7448–7451 (2017).
52. Prat, I., Gmez, L., Canta, M., Ribas, X. & Costas, M. *Chem. Eur. J.* **19**, 1908–1913 (2013).
53. Canta, M., Font, D., Gmez, L., Ribas, X. & Costas, M. *Adv. Synth. Catal.* **356**, 818–830 (2014).
54. Catino, A. J., Forslund, R. E. & Doyle, M. P. *J. Am. Chem. Soc.* **126**, 13622–13623 (2004).
55. Vicens, L., Bietti, M. & Costas, M. *Angew. Chem., Int. Ed.* **60**, 4740–4746 (2021).
56. Zhou, J., Jia, X., Song, M., Huang, Z., Steiner, A., An, Q., Ma, J., Guo, Z., Zhang, Q., Sun, H., Robertson, C., Bacsá, J., Xiao, J. & Li, C. *Angew. Chem., Int. Ed.* **61**, No. e202205983 (2022).
57. Gormisky, P. E. & White, M. C. *J. Am. Chem. Soc.* **135**, 14052–14055 (2013).
58. Mikhalyova, E. A., Makhlynets, O. V., Palluccio, T. D., Filatov, A. S. & Rybak-Akimova, E. V. *Chem. Commun.* **48**, 687–689 (2012).
59. Cussó, O., Garcia-Bosch, I., Ribas, X., Lloret Fillol, J. & Costas, M. *J. Am. Chem. Soc.* **135**, 14871–14878 (2013).

60. Ottenbacher, R. V., Samsonenko, D. G., Talsi, E. P. & Bryliakov, K. P. *ACS Catal.* **4**, 1599–1606 (2014).
61. Shen, D., Miao, C., Wang, S., Xia, C. & Sun, W. *Org. Lett.* **16**, 1108–1111 (2014).
62. Call, A., Capocasa, G., Palone, A., Vicens, L., Aparicio, E., Afailal, N. C., Siakavaras, N., Saló, M. E. L., Bietti, M. & Costas, M. *J. Am. Chem. Soc.* **145**, 18094–18103 (2023).
63. Legters, J., Thijs, L. & Zwanenburg, B. *Red. Trav. Chim. Pays-Bas*, **111**, 001–015 (1992).
64. Ho, X. H., Jung, W. J., Shyama, P. K. & Jang, H. Y. *Catal. Sci. Technol.* **4**, 1914–1919 (2014).
65. Baffert, C., Collomb, M. N., Deronzier, A., Pécaut, J., Limburg, J., Crabtree, R. H. & Brudvig, G. W. *Inorg. Chem.* **41**, 1404–1411 (2002).
66. Hureau, C., Blondin, G., Charlot, M. F., Philouze, C., Nierlich, M., Césario, M. & Anxolabéhère-Mallart, E. *Inorg. Chem.* **44**, 3669–3683 (2005).
67. Yang, G., Mikhalyova, E. A., Filatov, A. S., Kryatov, S. V. & Rybak-Akimova, E. V. *Inorg. Chim. Acta* **546**, 121288 (2023).
68. Kasper, J. B., Vicens, L., de Roo, C. M., Hage, R., Costas, M. & Browne, W. R. *ACS Catal.* **13**, 6403–6415 (2023).
69. Rao, C. B., Rao, D. C., Babu, D. C. & Venkateswarlu, Y. *Eur. J. Org. Chem.* 2855–2859 (2010).
70. Basumatary, G. & Bez, G. *Tetrahedron Lett.* **58**, 4312–4315 (2017).
71. Ema, T., Ura, N., Yoshii, M., Korenaga, T. & Sakai, T. *Tetrahedron*, **65**, 9583–9591 (2009).
72. Päiviö, M., Mavrynsky, D., Leino, R. & Kanerva, L. T. *Eur. J. Org. Chem.* 1452–1457 (2011).
73. Lu, P., Hou, T., Gu, X. & Li, P. *Org. Lett.* **17**, 1954–1957 (2015).
74. Taylor, J., Whittall, N. & Hii, K. K. *Chem. Commun.* 5103–5105 (2005).
75. Li, J., Qu, S. & Zhao, W. *Angew. Chem., Int. Ed.* **59**, 2360–2364 (2020).
76. Zhang, X., Shen, C., Xia, C., Tian, X. & He, L. *Green Chem.* **20**, 5533–5539 (2018).
77. Furuta, A., Fukuyama, T. & Ryu, I. *Bull. Chem. Soc. Jpn.* **90**, 607–612 (2017).
78. O'Mahony, R. M., Lynch, D., Hayes, H. L. D., Thuama, E. N., Donnellan, P., Jones, R. C., Glennon, B., Collins, S. G. & Maguire, A. R., *Eur. J. Org. Chem.* 6533–6539 (2017).
79. Zhang, L., Si, X., Yang, Y., Witzel, S., Sekine, K., Rudolph, M., Rominger, F. & Hashmi, A. S. K. *ACS Catal.* **9**, 6118–6123 (2019).
80. Mosley, C. A., Myers, S. J., Murray, E. E., Santangelo, R., Tahirovic, Y. A., Kurtkaya, Mullasseril, P., Yuan, H., Lyuboslavsky, P., Le, P., Wilson, L. J., Yepes, M., Dingledine, R.,



- Traynelis, S. F. & Liotta, D. C. *Bioorg. Med. Chem.* **17**, 6463–6480 (2009).
81. Shukla, P., Hsu, Y.-C. & Cheng, C. H. *J. Org. Chem.* **71**, 655–658 (2006).
  82. Fu, L., Chen, Q., Wang, Z. & Nishihara, Y. *Org. Lett.* **22**, 2350–2353 (2020).
  83. Johnston, C. P., Smith, R. T., Allmendinger, S. & MacMillan, D. W. C. *Nature* **536**, 322–325 (2016).
  84. Vicens, L., Bietti, M. & Costas, M. *Angew. Chem. Int. Ed.* **60**, 4740–4746 (2021).
  85. Chen, Z., Cai, Q., Boni, Y. T. Liu, W., Fu, J. & Davies, H. M. L. *Org. Lett.* **25**, 3995–3999 (2023).
  86. Lardy, S. W. & Schmidt, V. A. *J. Am. Chem. Soc.* **140**, 12318–12322 (2018).
  87. Mbofana, C. T., Chong, E., Lawniczak, J. & Sanford, M. S. *Org. Lett.* **18**, 4258–4261 (2016).
  88. Alcázar, J. J. *Comb. Chem.* **7**, 353–355 (2005).
  89. Huang, G., Kouklovsky, C. & Torre, A. de la *J. Am. Chem. Soc.* **144**, 17803–17807 (2022).
  90. Zhang, H., He, X., Wang, X., Yua, B., Zhao, S., Jiao, P., Jin, H., Liu, Z., Wang, K., Zhang, L. & Zhang, L. *Eur. J. Med. Chem.* **207**, 112774 (2020).
  91. Zhang, X. & Rovis, T. *J. Am. Chem. Soc.* **143**, 21211–21217 (2021).
  92. Rybak, A. & Meier, M. A. R. *Green Chem.* **9**, 1356–1361 (2007).
  93. Tang, K. H. N., Uchida, K., Nishihara, K., Ito, M. & Shibata, T. *Org. Lett.* **24**, 1313–1317 (2022).
  94. Wang, Z. X., Bai, X. Y., Yao, H. C. & Li, B. J. *J. Am. Chem. Soc.* **138**, 14872–14875 (2016).
  95. Brewitz, L., Dumjahn, L., Zhao, Y., Owen, C. D., Laidlaw, S. M., Malla, T. R., Nguyen, D., Lukacik, P., Salah, E., Crawshaw, A. D., Warren, A. J., Trincao, J., Strain-Damerell, C., Carroll, M. W., Walsh, M. A. & Schofield, C. J. *J. Med. Chem.* **66**, 2663–2680 (2023).
  96. Sheng, C., Ling, Z., Luo, Y. & Zhang, W. *Nat Commun.* **13**, 400 (2022).
  97. Lee, G. S., Park, B. & Hong, S. H. *Nat Commun.* **13**, 5200 (2022).
  98. Li, C. Q., Lang, K., Lu, H. J., Hu, Y., Cui, X., Wojtas, L. & Zhang, X. P. *Angew. Chem., Int. Ed.* **57**, 16837–16841 (2018).
  99. Li, X., Che, X., Chen, G. H., Zhang, J., Yan, J. L., Zhang, Y. F., Zhang, L. S., Hsu, C. P., Gao, Y. Q. & Shi, Z. J. *Org. Lett.* **18**, 1234–1237 (2016).
  100. Uraguchi, D., Kinoshita, N. & Ooi, T. *J. Am. Chem. Soc.* **132**, 12240–12242 (2010).
  101. Chen, K., Hu, F., Zhang, S. Q. & Shi, B. F. *Chem. Sci.* **4**, 3906–3911 (2013).
  102. Zhan, B. B., Li, Y., Xu, J. W., Nie, X. L., Fan, J., Jin, L. & Shi, B. F. *Angew. Chem. Int. Ed.*

- 57**, 5858–5862 (2018).
103. Wang, L., Wang, C. L., Lian, Z. H., Li, P. F., Kang, J. C., Zhou, J., Hao, Y., Liu, R. X., Bai, H. Y. & Zhang, S. Y. *Nat Commun.* **15**, 1483 (2024).
  104. Luan, R., Lin, P., Li, K., Du, Y. & Su, W. *Nat Commun.* **15**, 1723 (2024).
  105. Collier, P. N., Campbell, A. D., Patel, I., Raynham, T. M. & Taylor, R. J. K. *J. Org. Chem.* **67**, 1802–1815 (2002).
  106. Collier, P. N., Campbell, A. D., Patel, I. & Taylor, R. J. K. *Tetrahedron* **58**, 6117–6125 (2002).
  107. Vanos, C. M. & Lambert, T. H. *Chem. Sci.* **1**, 705–708 (2010).
  108. Patil, V. V., Gayakwad, E. M. & Shankarling, G. S. *J. Org. Chem.* **81**, 781–786 (2016).
  109. Suzuki, K., Watanabe, T. & Murahashi, S. I. *J. Org. Chem.* **78**, 2301–2310 (2013).
  110. Hwu, J. R., Tseng, W. N., Patel, H. V., Wong, F. F., Horng, D. N., Liaw, B. R. & Lin, L. C. *J. Org. Chem.* **64**, 2211–2218 (1999).
  111. Colin, B., Lavastre, O., Fouquay, S., Michaud, G., Simon, F. & Brusson, J. M. *ACS Comb. Sci.* **21**, 300–309 (2019).
  112. Eshghi, H. & Hassankhan, A. *Org. Prep. Proced. Int.* **37**, 575–579 (2009).
  113. Clive, D. L. J., Pham, M. P. & Subedi, R. *J. Am. Chem. Soc.* **129**, 2713–2717 (2007).
  114. Torán, R., Vila, C., Sanz-Marco, A., Muñoz, M. C., Pedro, J. R. & Blay, G. *Eur. J. Org. Chem.* 627–630 (2020).
  115. Li, B., Chen, J., Liu, D., Gridnev, I. D. & Zhang, W. *Nat. Chem.* **14**, 920–927 (2022).
  116. Gao, Y., Liu, J., Li, Z., Guo, T., Xu, S., Zhu, H., Wei, F., Chen, S., Gebru, H. & Guo, K. *J. Org. Chem.* **83**, 2040–2049 (2018).
  117. Zhu, C., Tang, P. & Yu, B. *J. Am. Chem. Soc.* **130**, 5872–5873 (2008).
  118. Laudadio, G., Govaerts, S., Wang, Y., Ravelli, D., Koolman, H. F., Fagnoni, M., Djuric, S. W. & Noël, T. *Angew. Chem. Int. Ed.* **57**, 4078–4082 (2018).
  119. Sheldrick, G. M., *Acta Crystallogr., Sect. A* **71**, 3–8 (2015).

## 15. $^1\text{H}$ , $^{13}\text{C}$ , $^{19}\text{F}$ NMR spectra

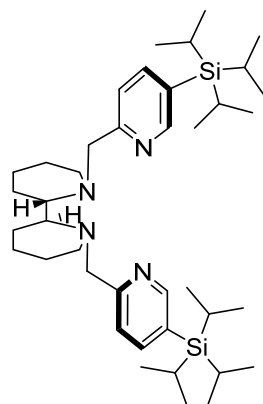

*rac*-L<sup>1</sup>

**<sup>1</sup>H NMR, 400 MHz, CDCl<sub>3</sub>**

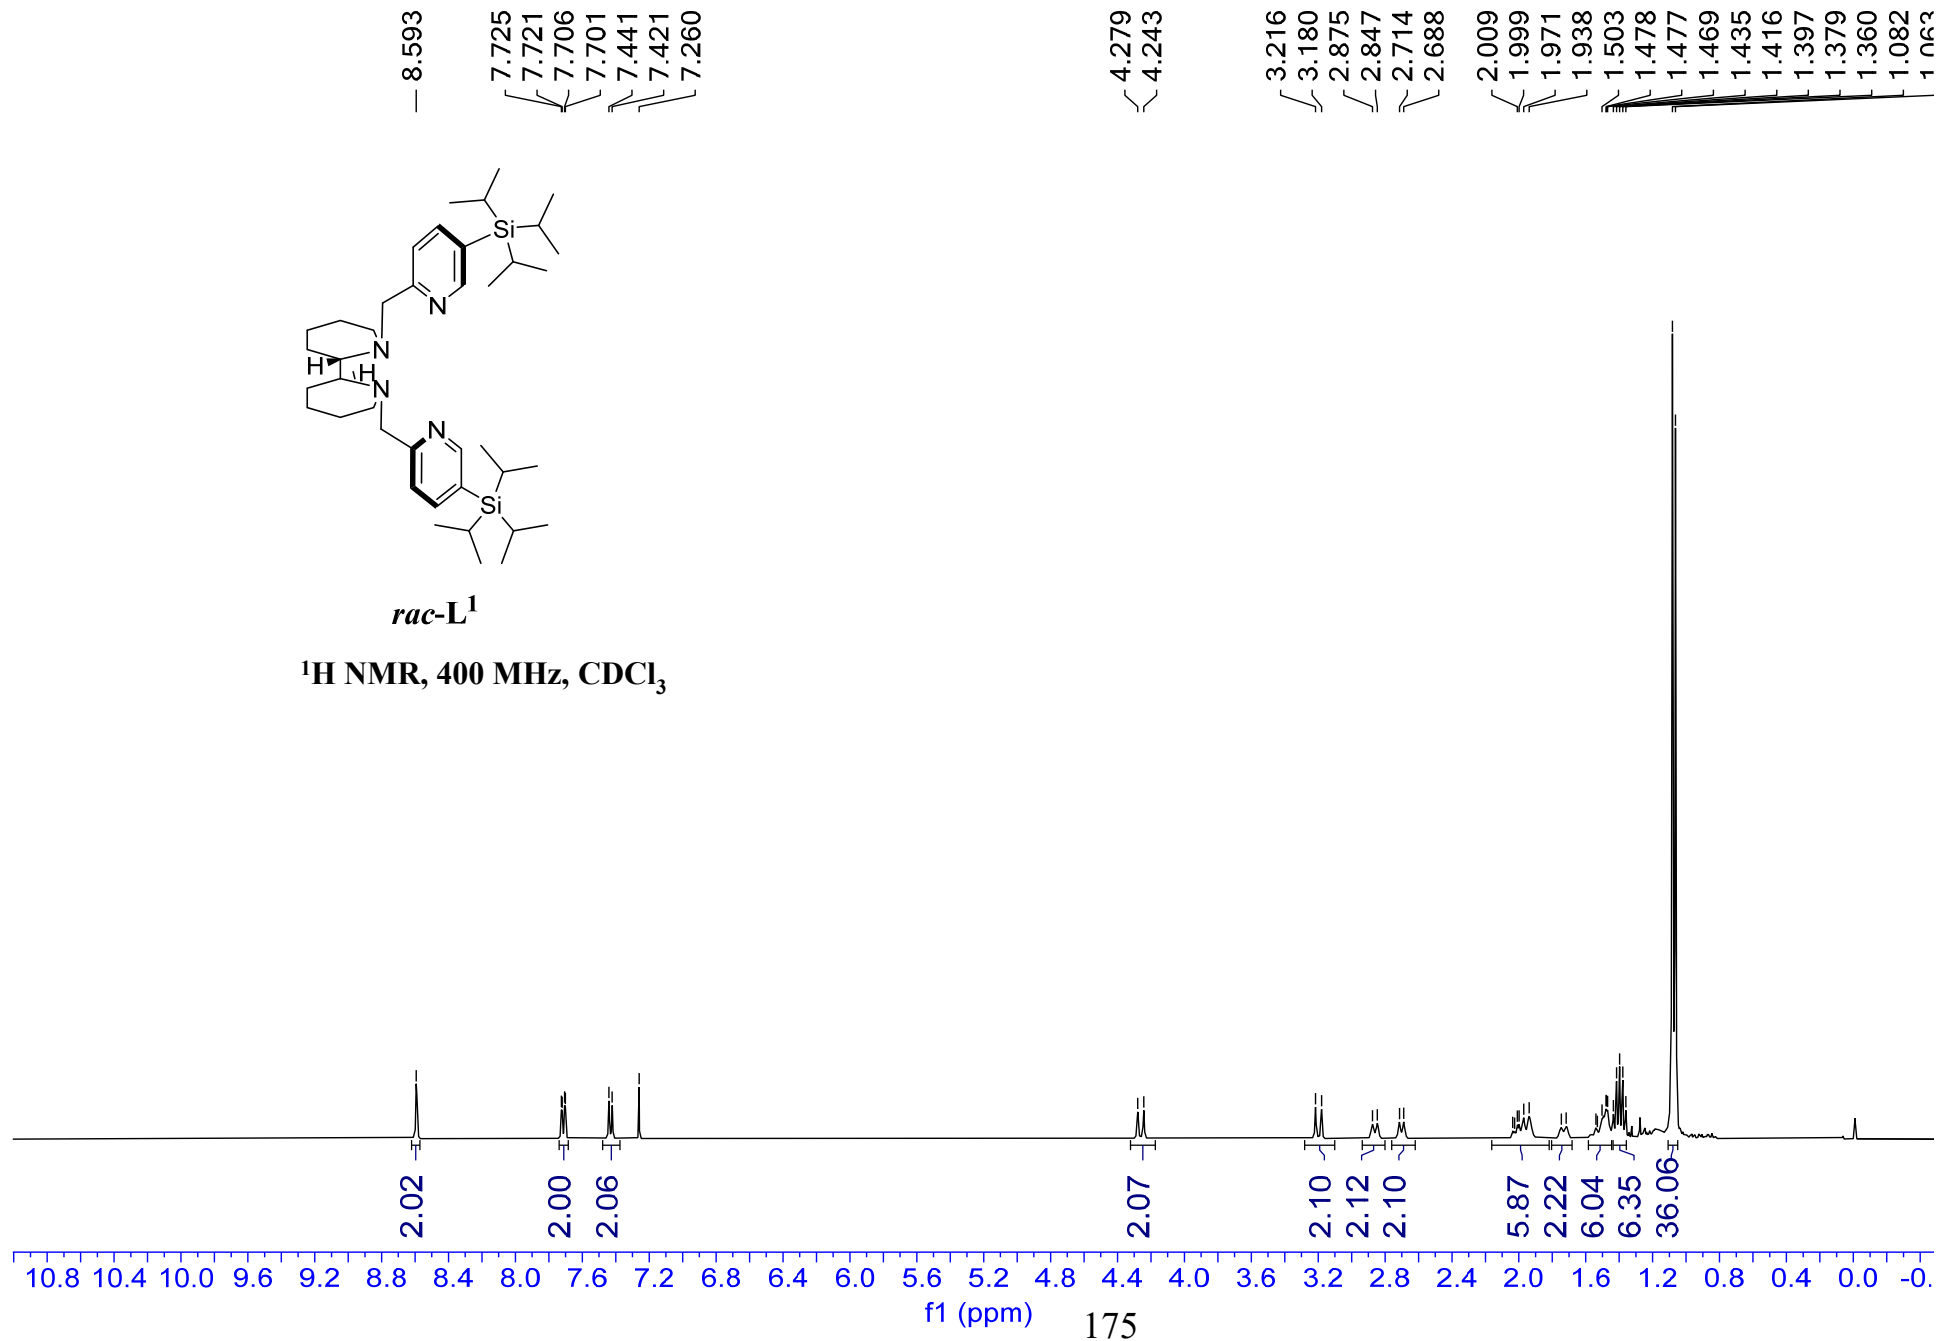

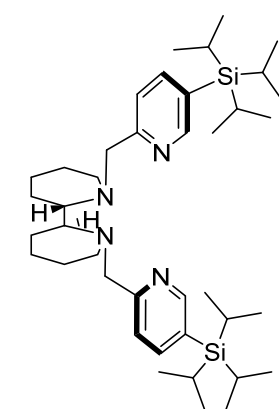

*rac-L*<sup>1</sup>

<sup>13</sup>C NMR 101 MHz, CDCl<sub>3</sub>

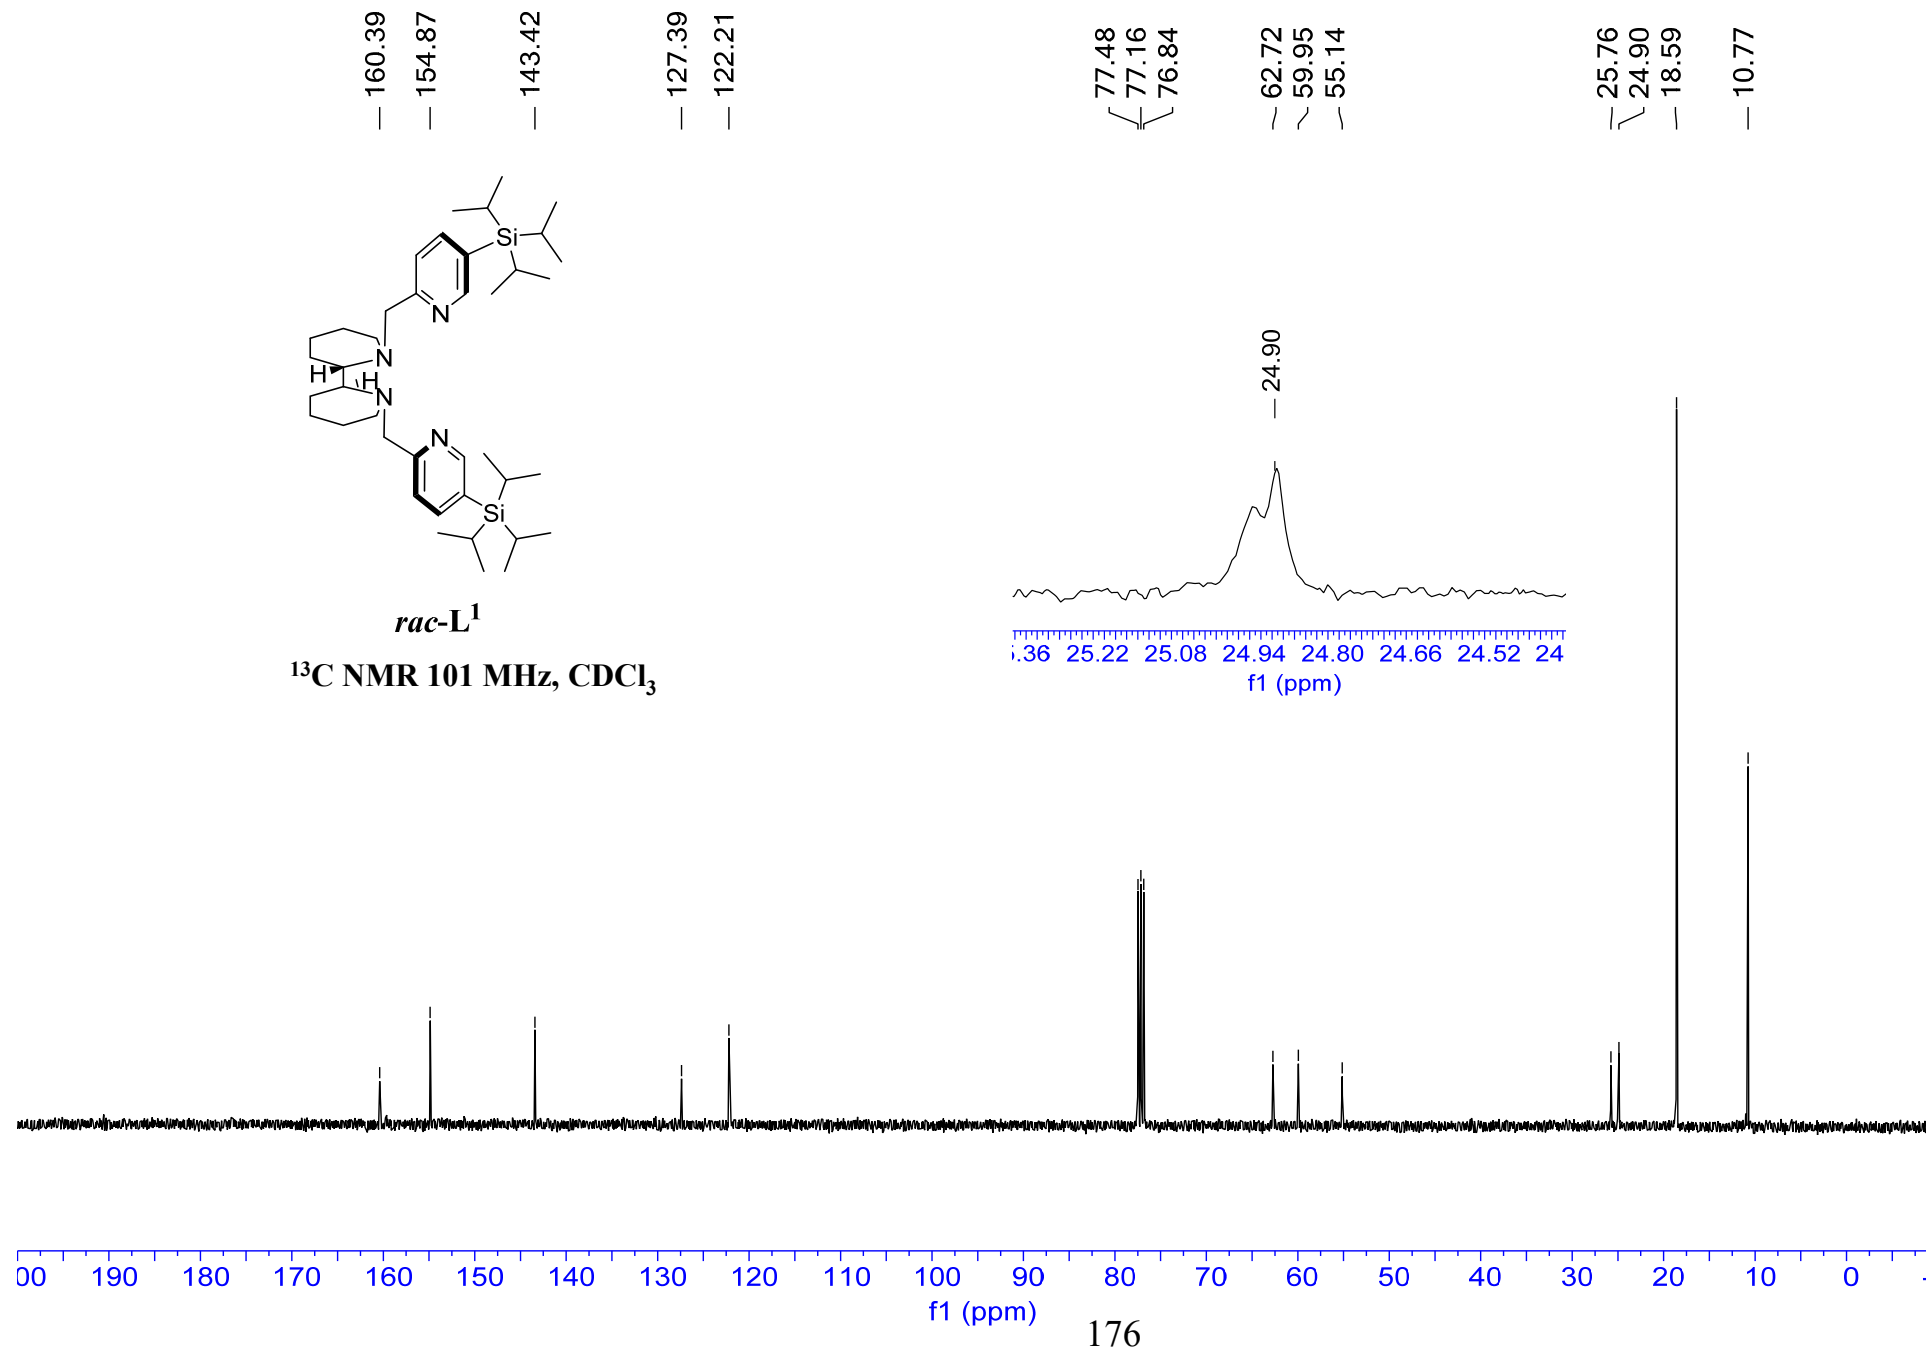

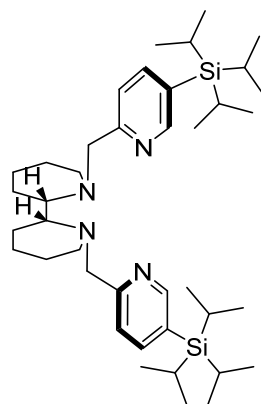

*meso-L*<sup>1</sup>

<sup>1</sup>H NMR, 400 MHz, CDCl<sub>3</sub>

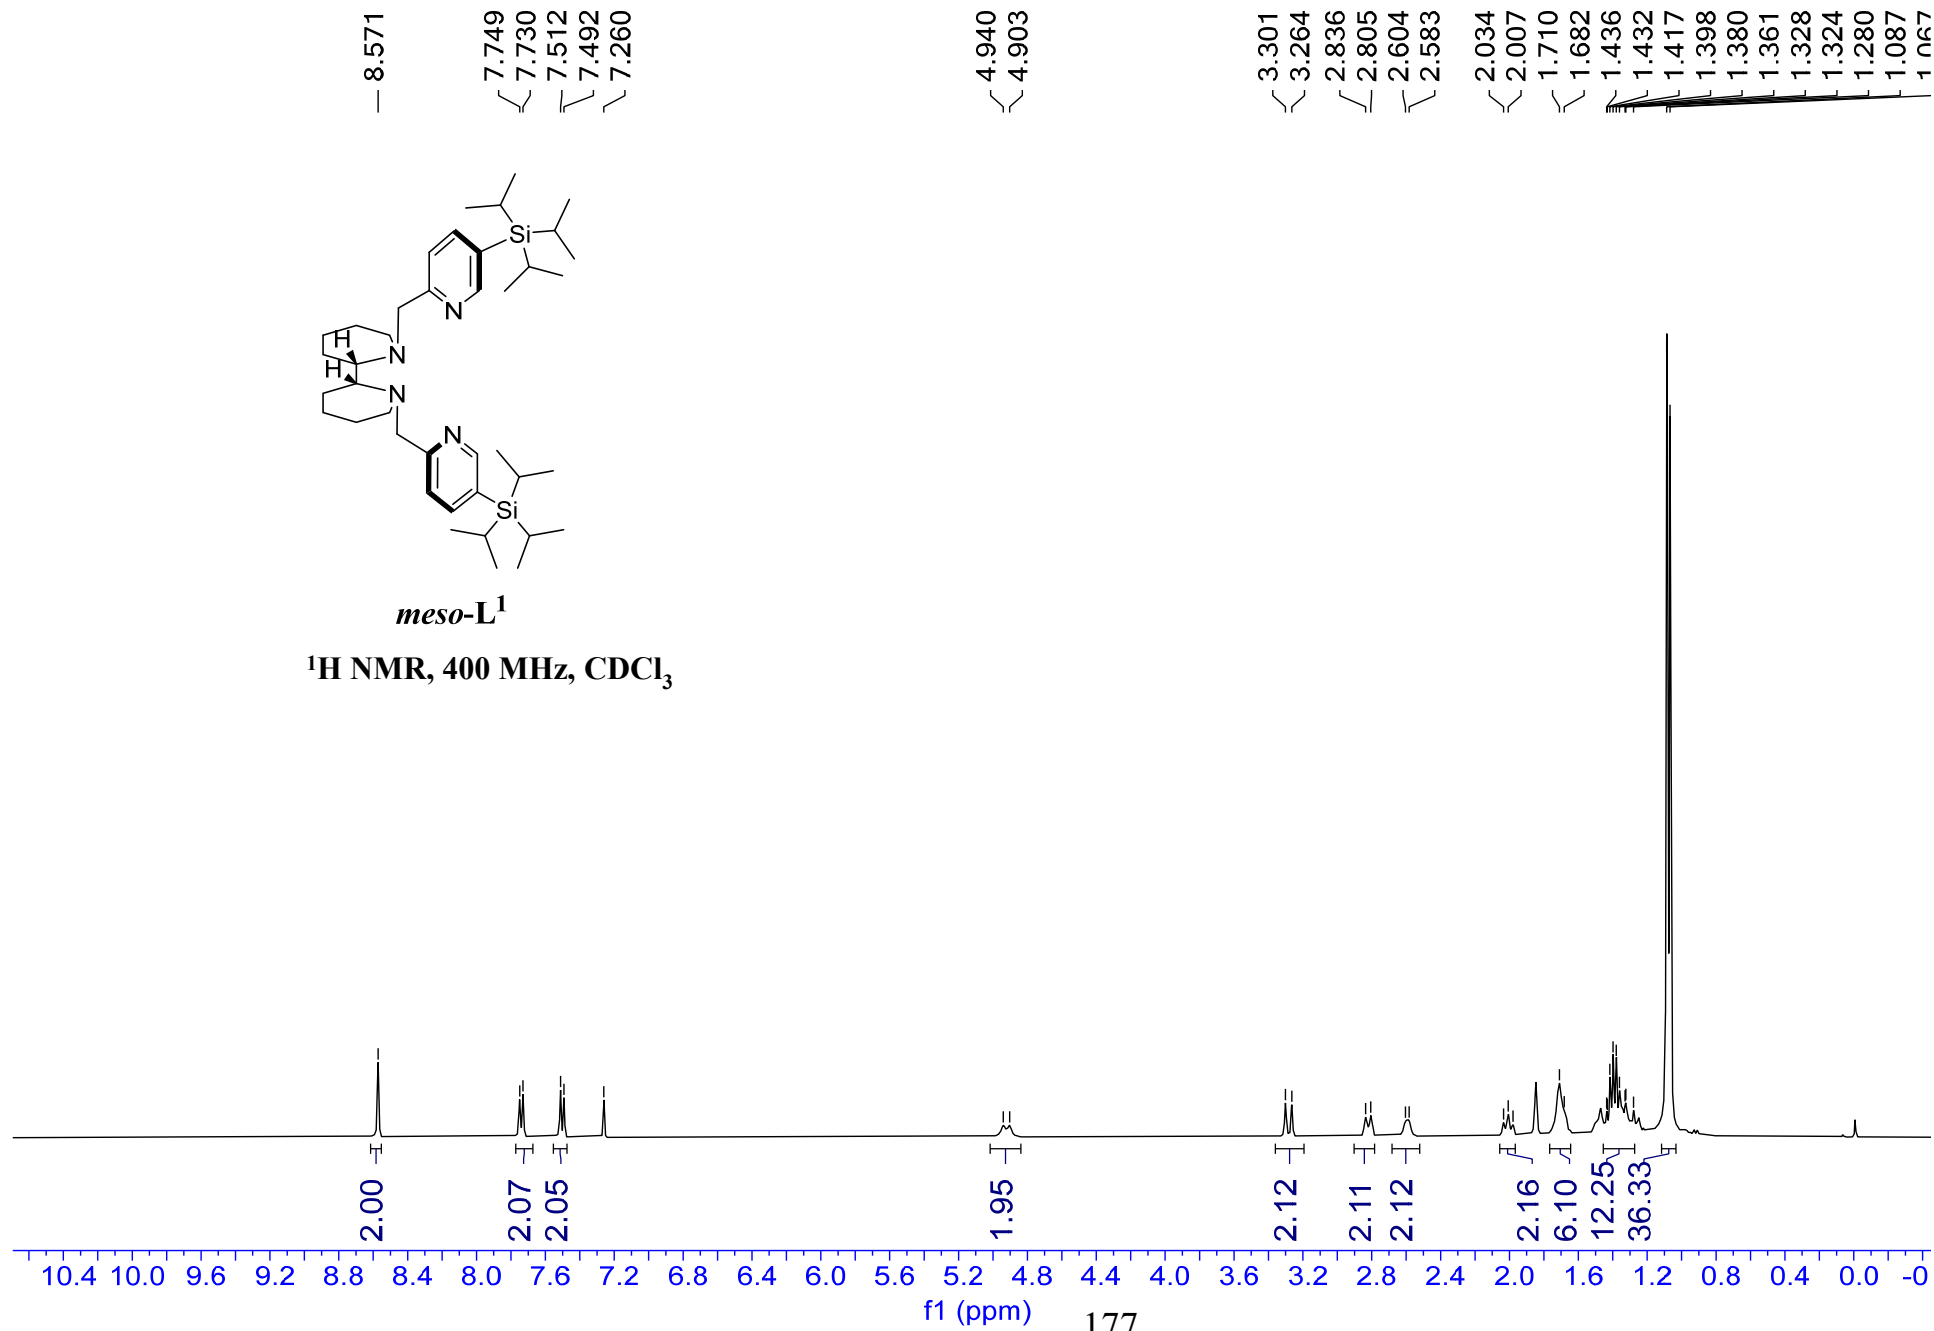

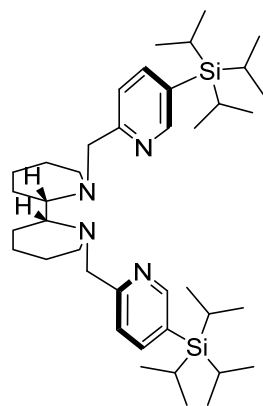

*meso-L*<sup>1</sup>

<sup>13</sup>C NMR 101 MHz, CDCl<sub>3</sub>

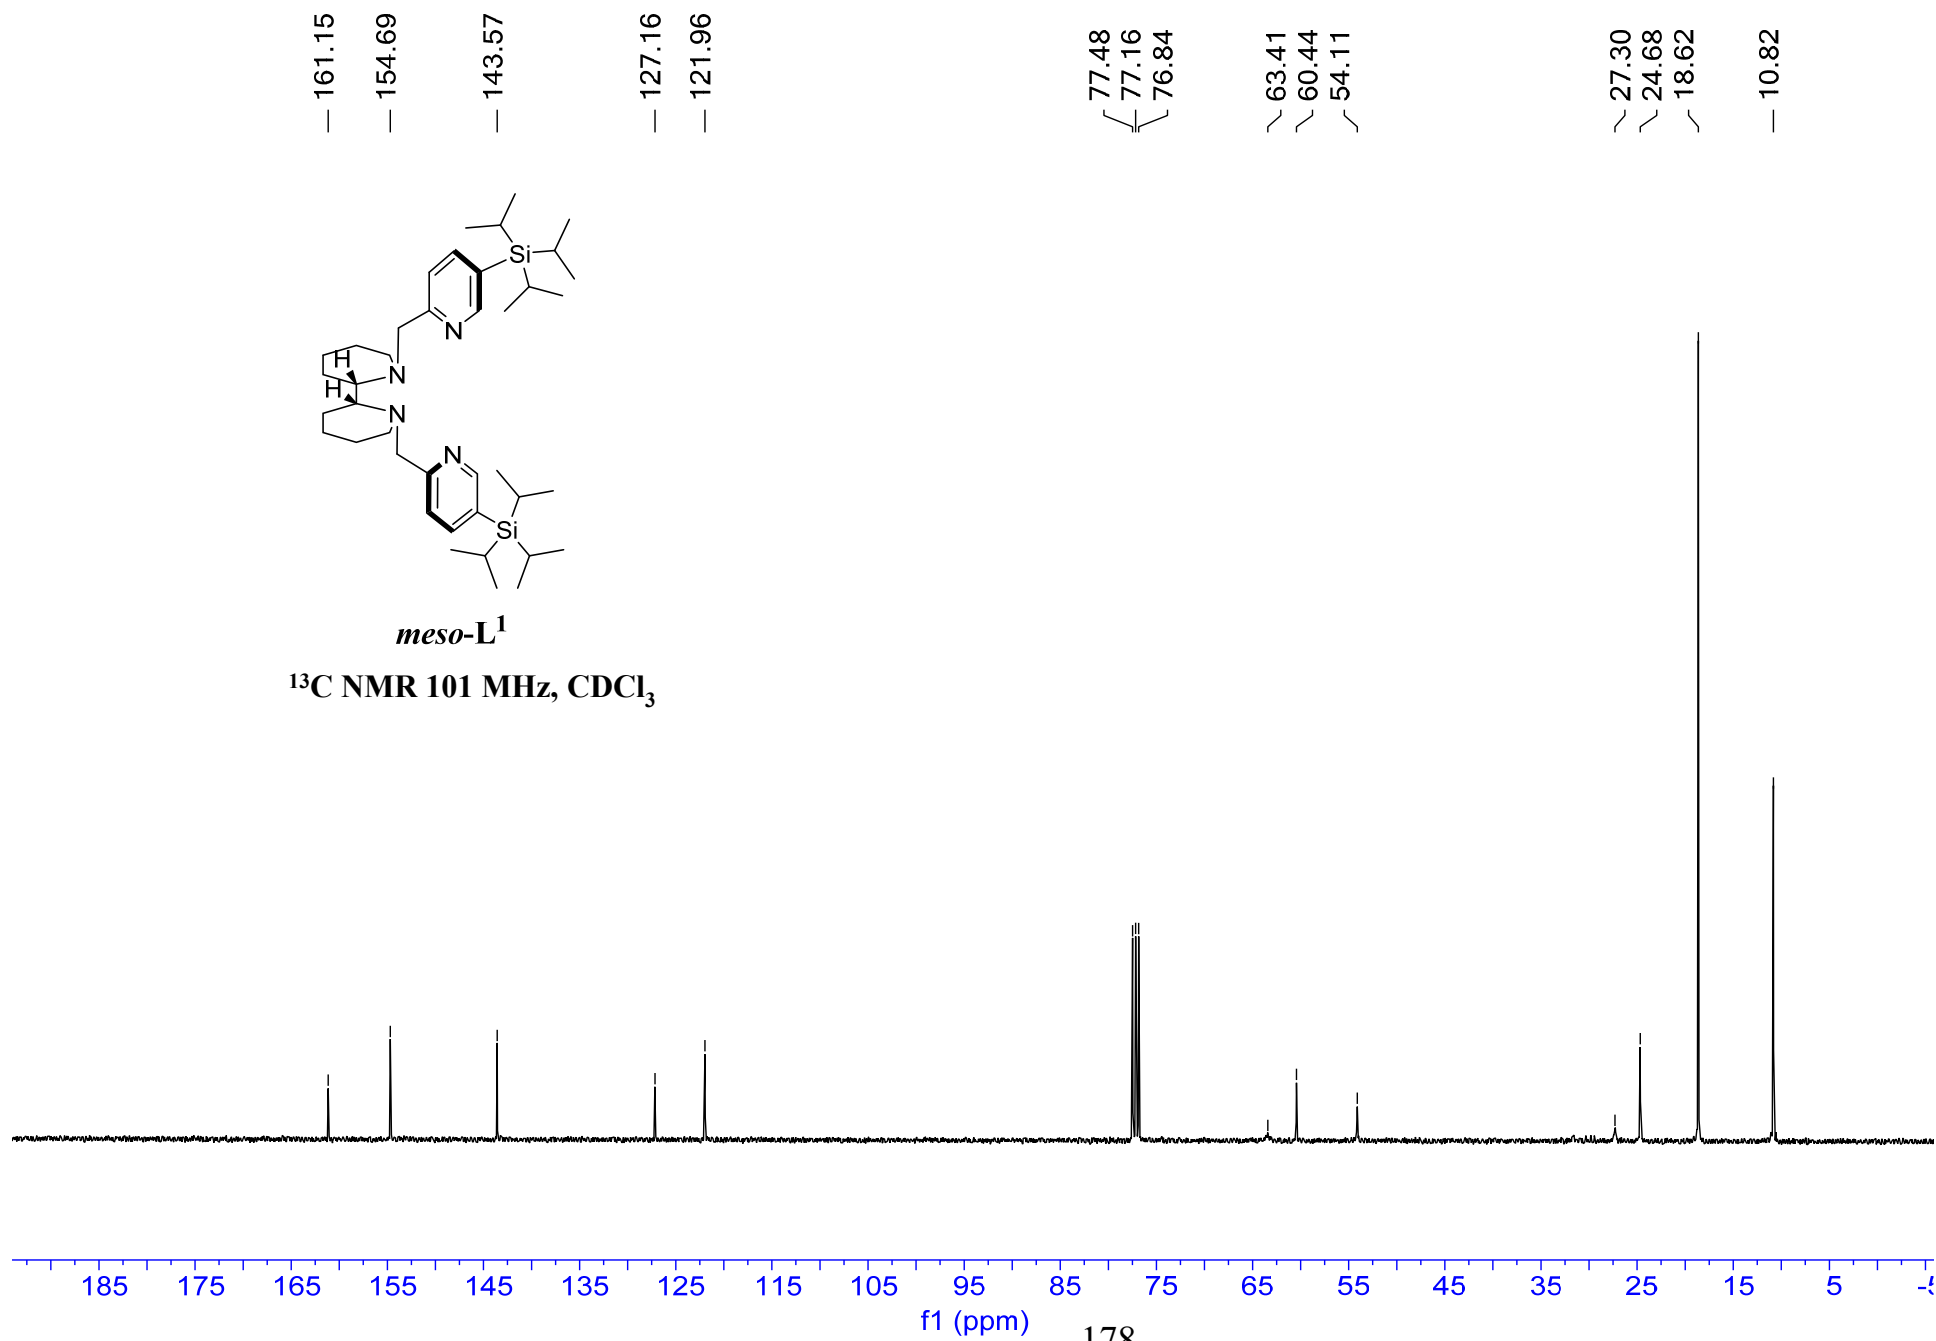

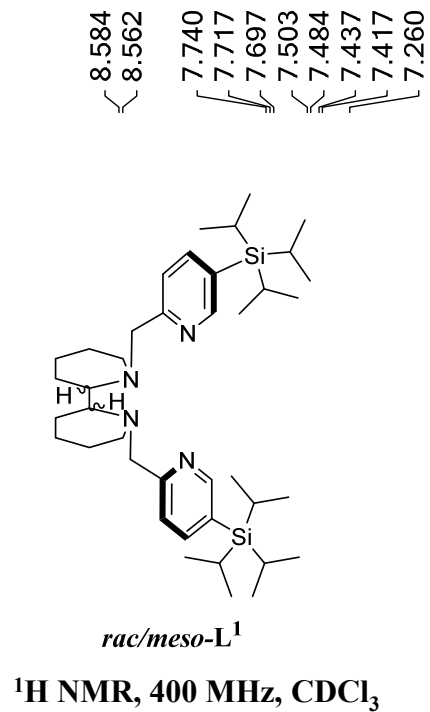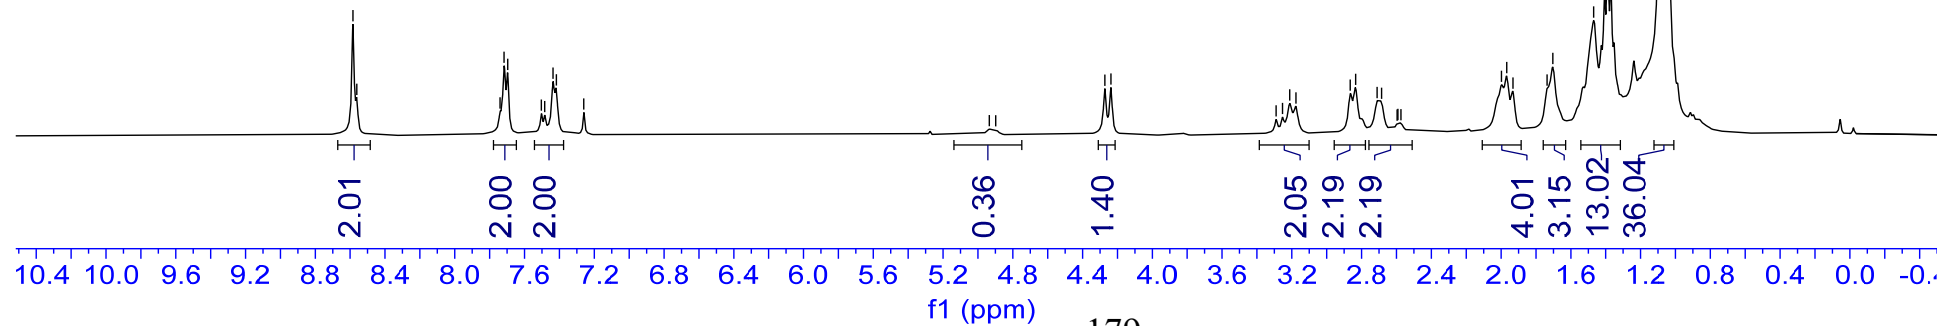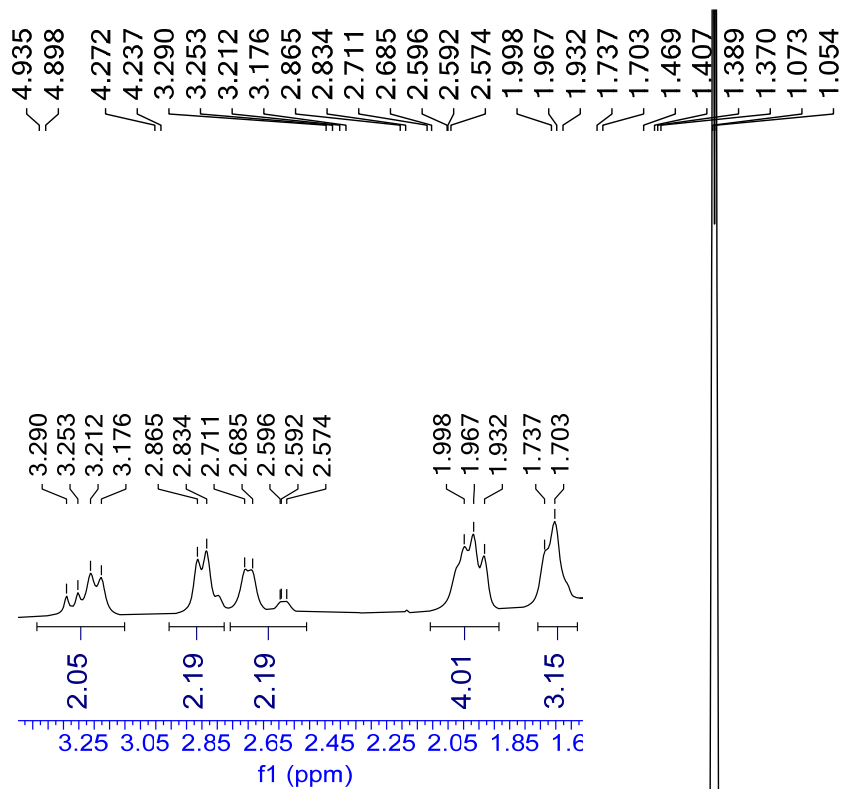

8.584  
8.562  
7.740  
7.717  
7.697  
7.503  
7.484  
7.437  
7.417  
7.260

4.935  
4.898  
4.272  
4.237  
3.290  
3.253  
3.212  
3.176  
2.865  
2.834  
2.711  
2.685  
2.596  
2.592  
2.574  
1.998  
1.967  
1.932  
1.737  
1.703  
1.469  
1.407  
1.389  
1.370  
1.073  
1.054

$^{13}\text{C}$  NMR 101 MHz,  $\text{CDCl}_3$

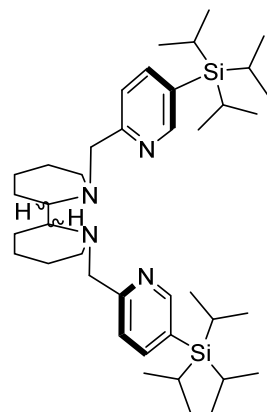

*rac/meso*-**L**<sup>1</sup>

161.10  
160.38  
154.87  
154.65

143.60  
143.43

127.40  
127.15  
122.23  
121.95

77.48  
77.16  
76.84

62.70  
60.40  
59.93  
55.12  
54.15

29.77  
27.33  
25.74  
24.89  
24.69  
18.59  
10.76

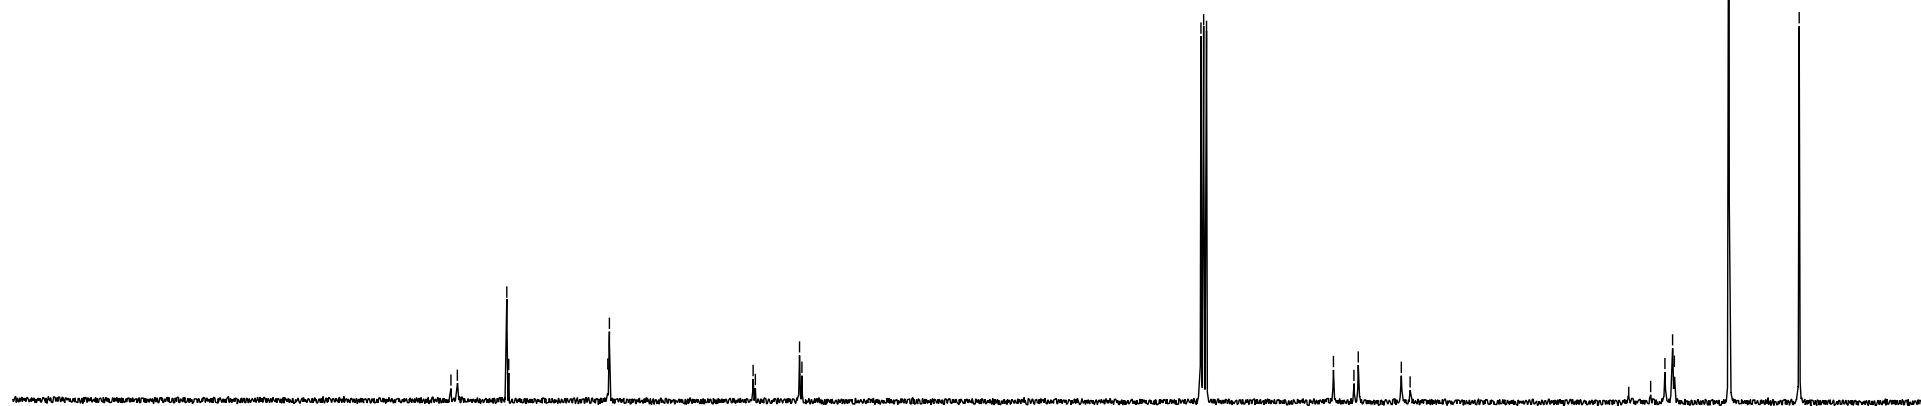

200 190 180 170 160 150 140 130 120 110 100 90 80 70 60 50 40 30 20 10 0

f1 (ppm)  
180



<sup>1</sup>H NMR, 400 MHz, CDCl<sub>3</sub>

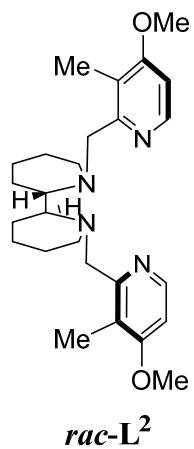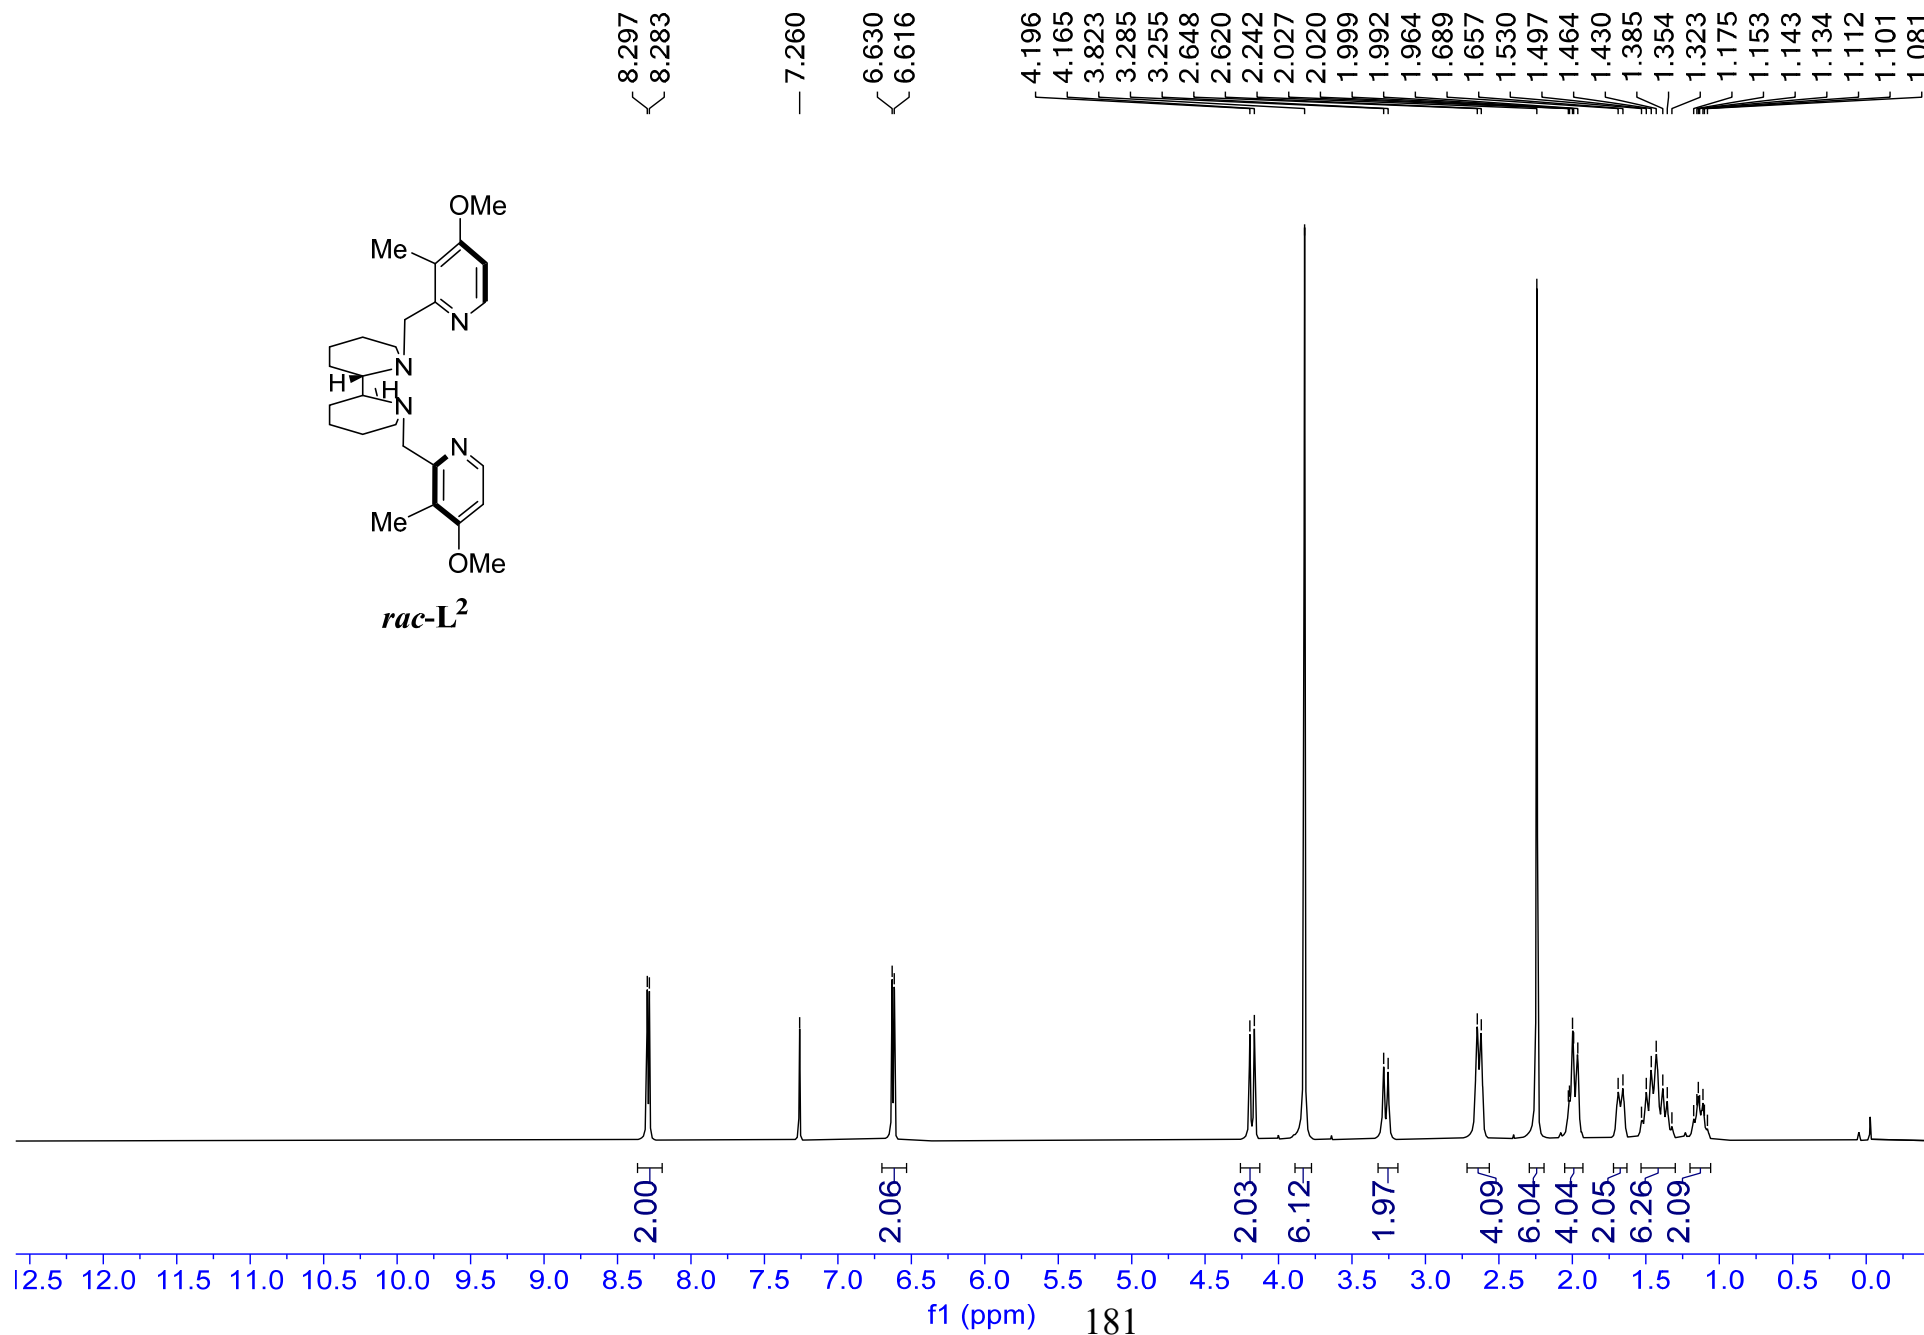

$^{13}\text{C}$  NMR 101 MHz,  $\text{CDCl}_3$

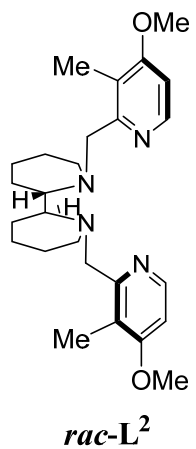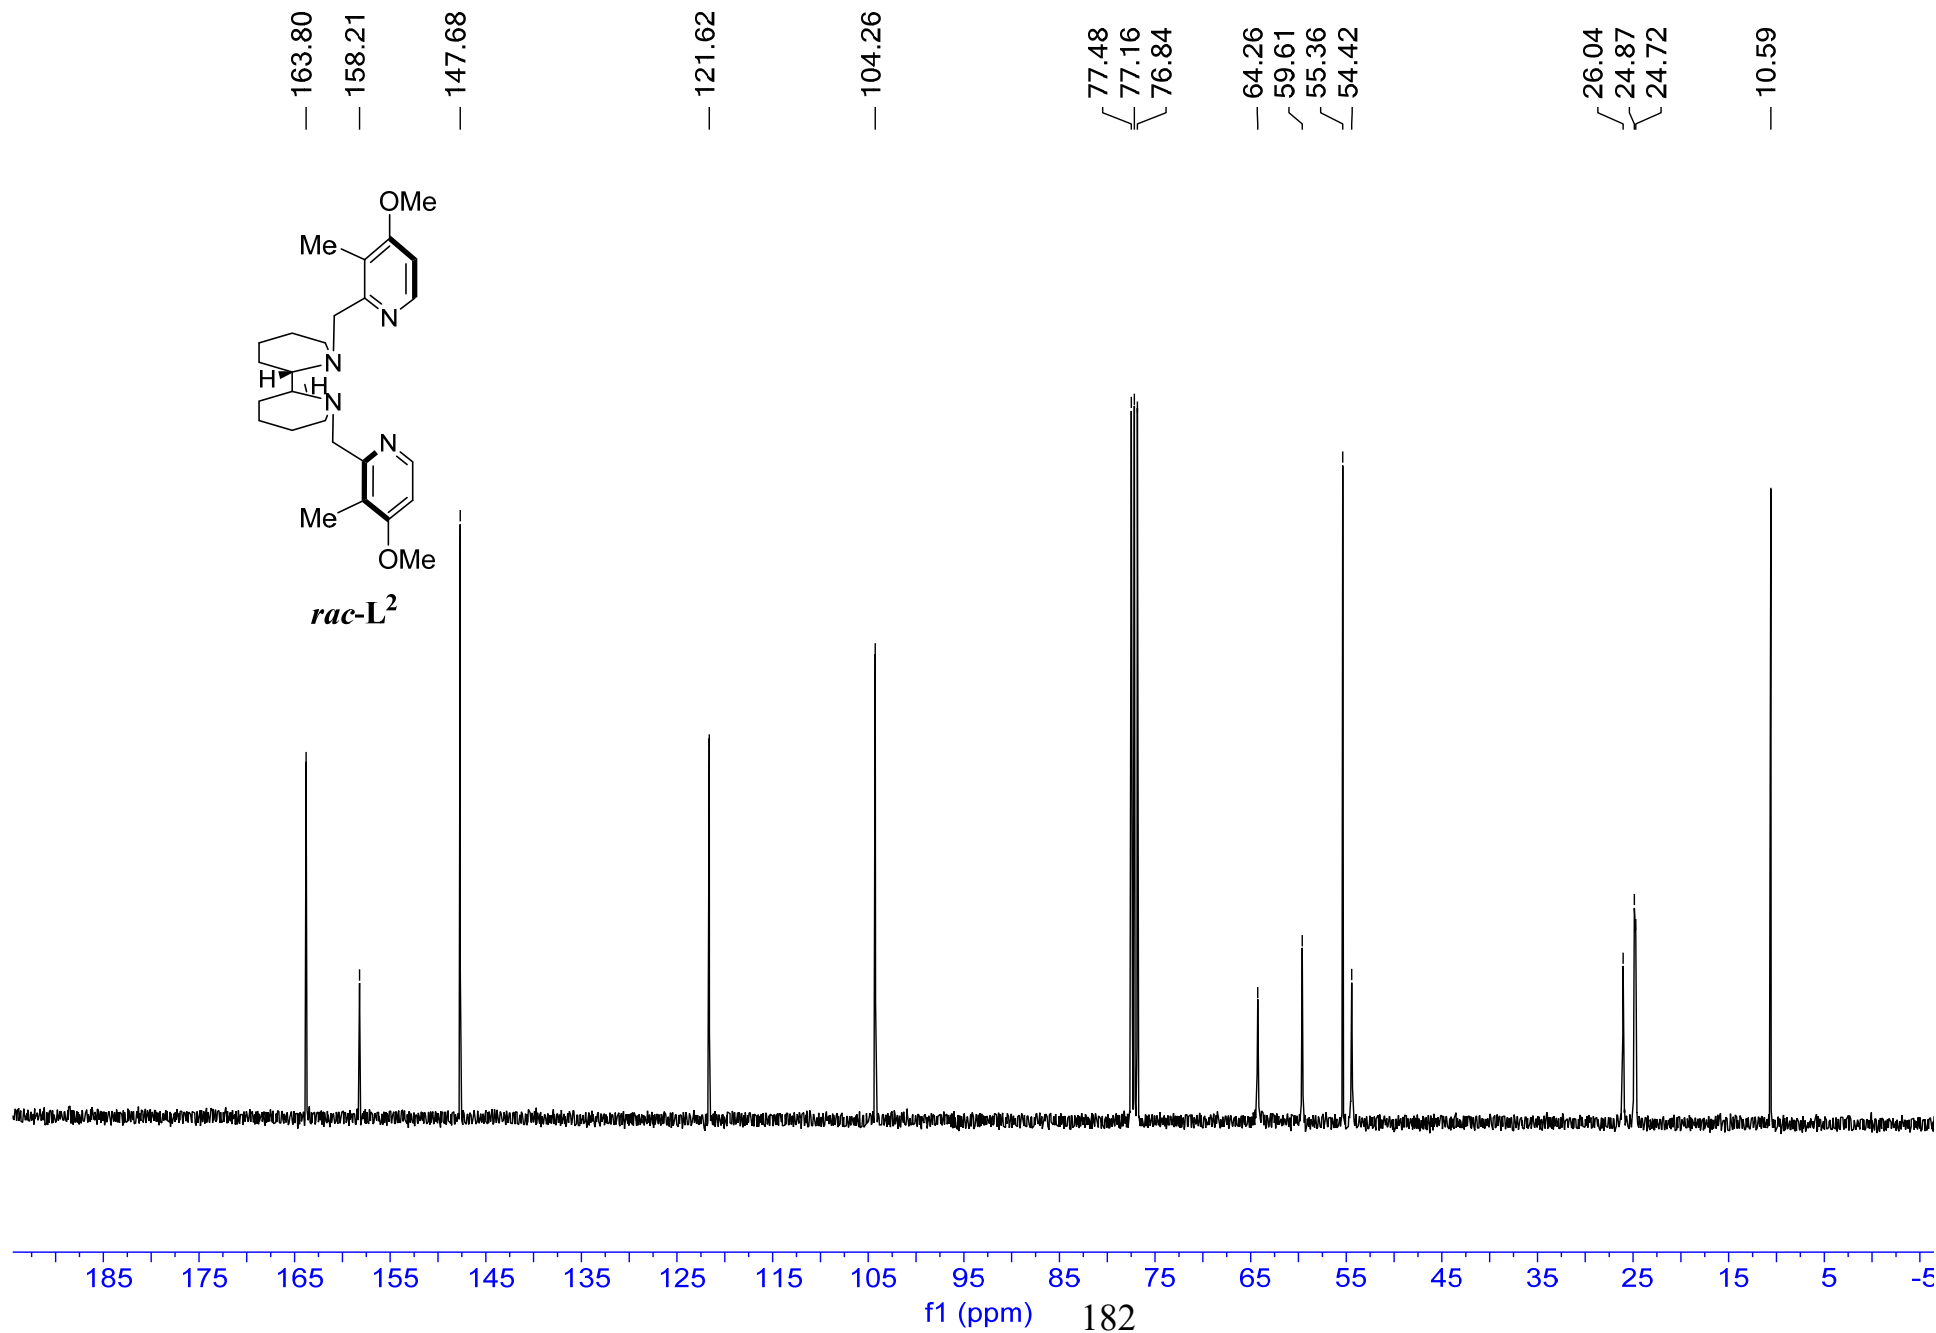

<sup>1</sup>H NMR, 400 MHz, CDCl<sub>3</sub>

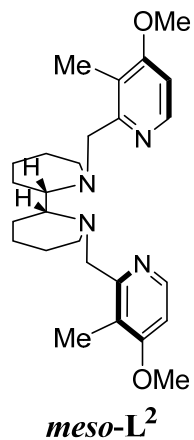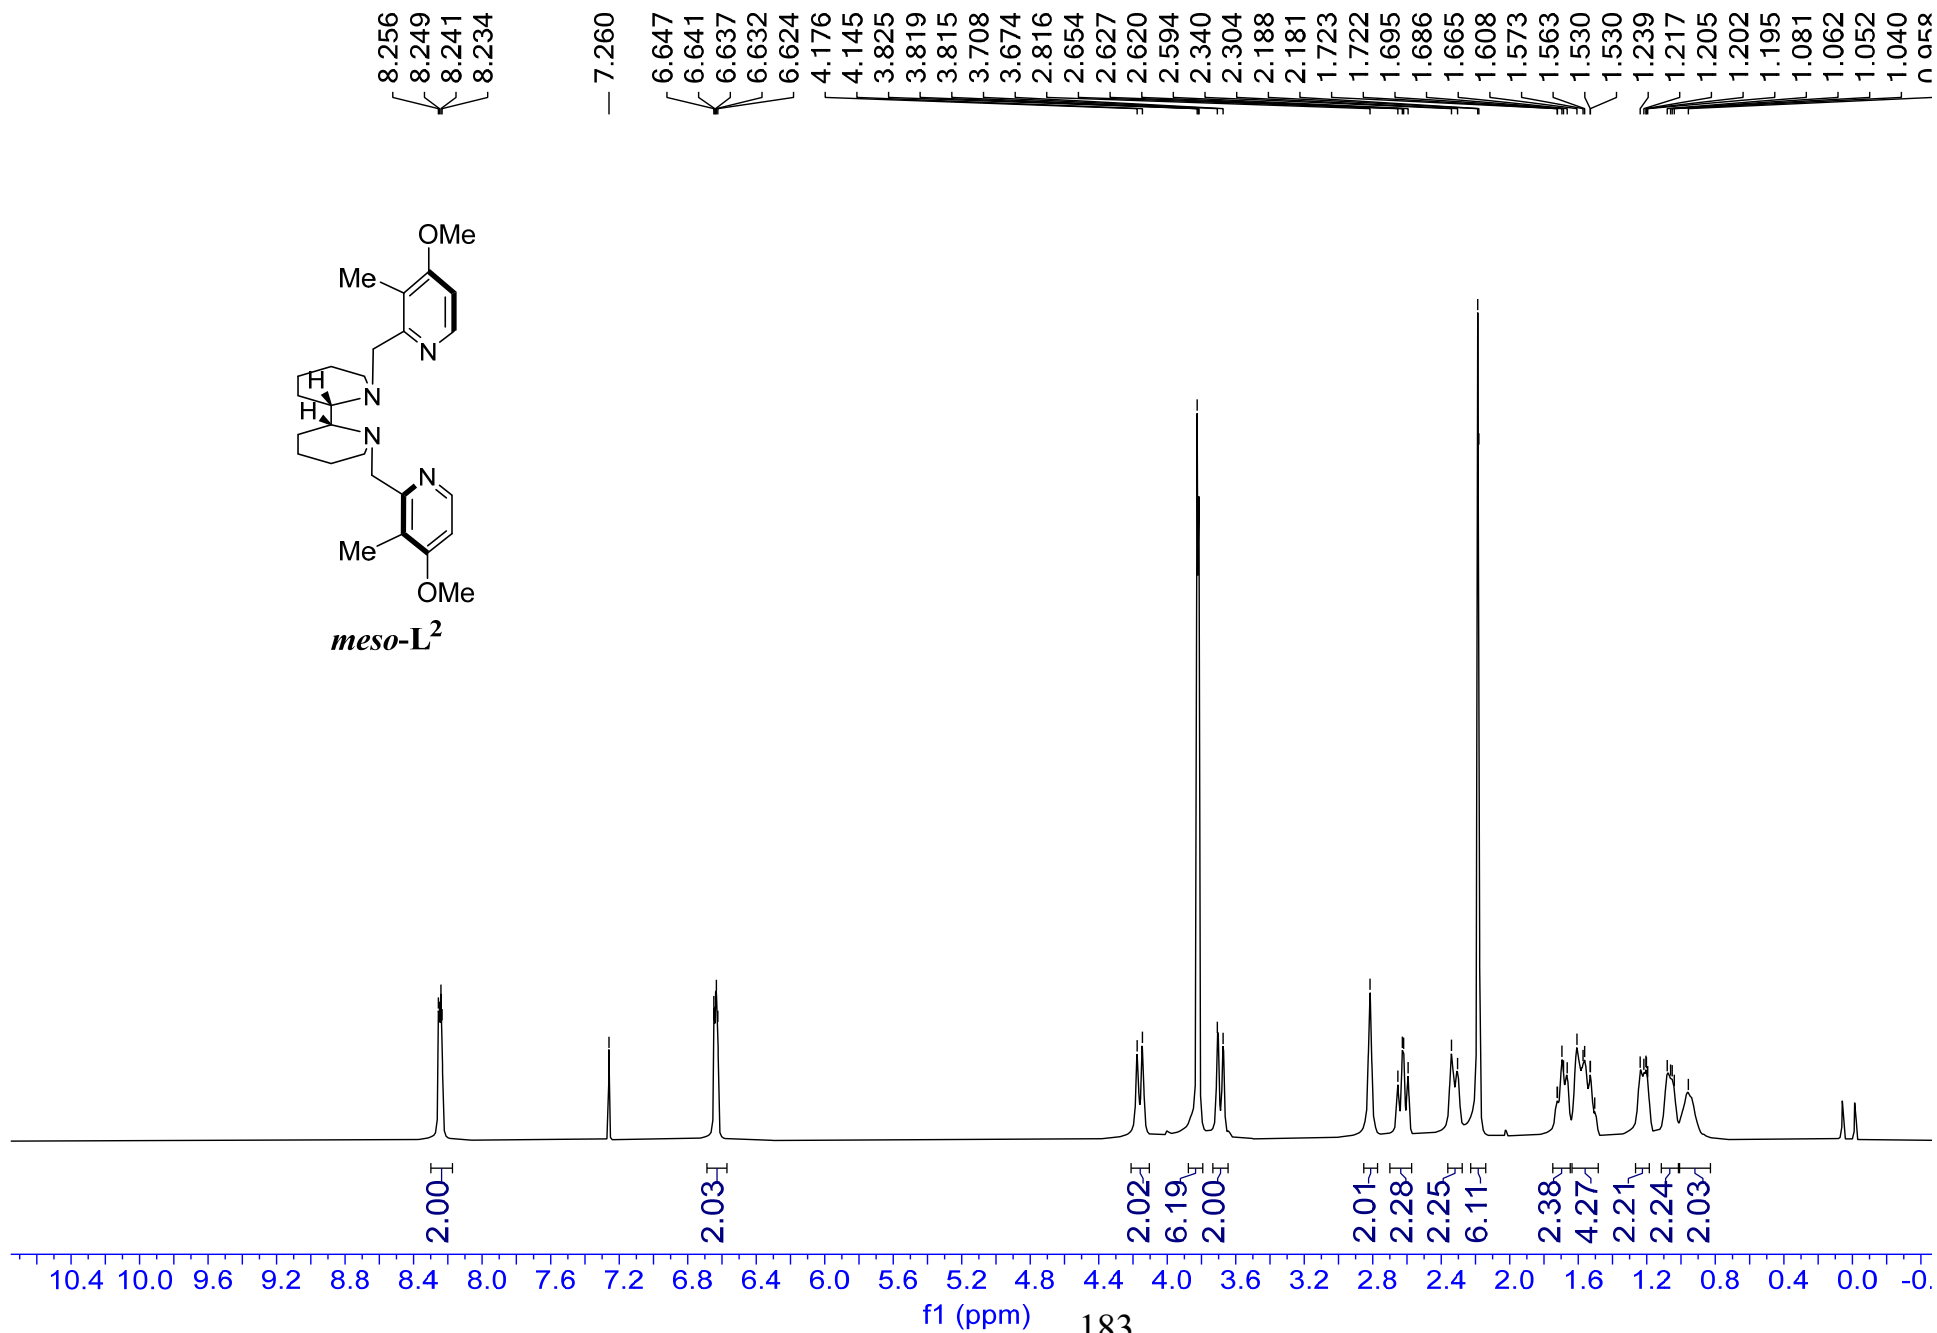

$^{13}\text{C}$  NMR 101 MHz,  $\text{CDCl}_3$

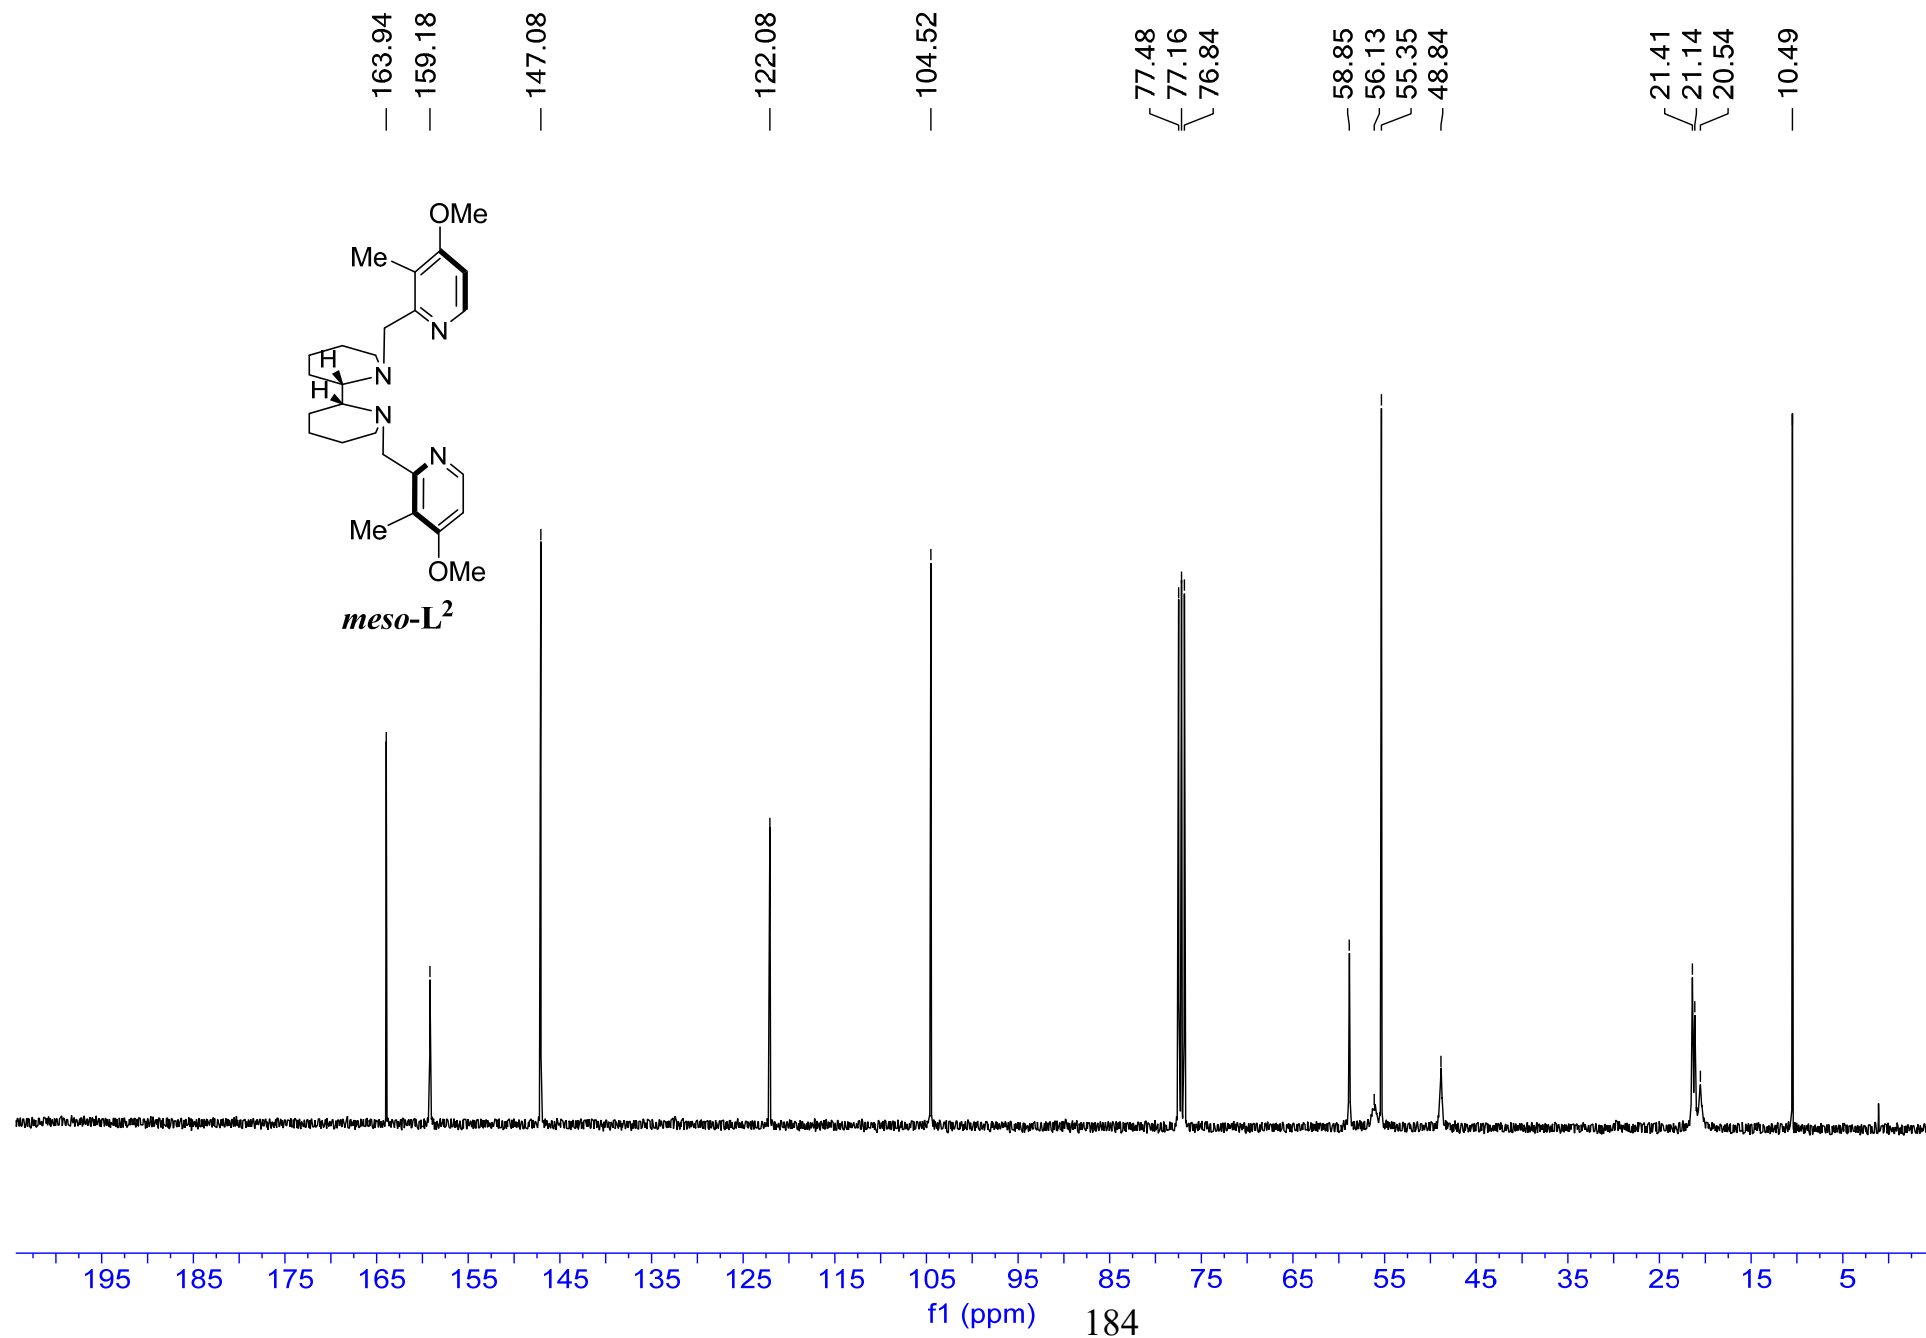

<sup>1</sup>H NMR, 400 MHz, CDCl<sub>3</sub>

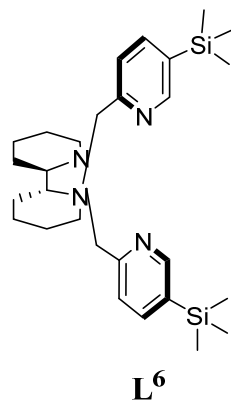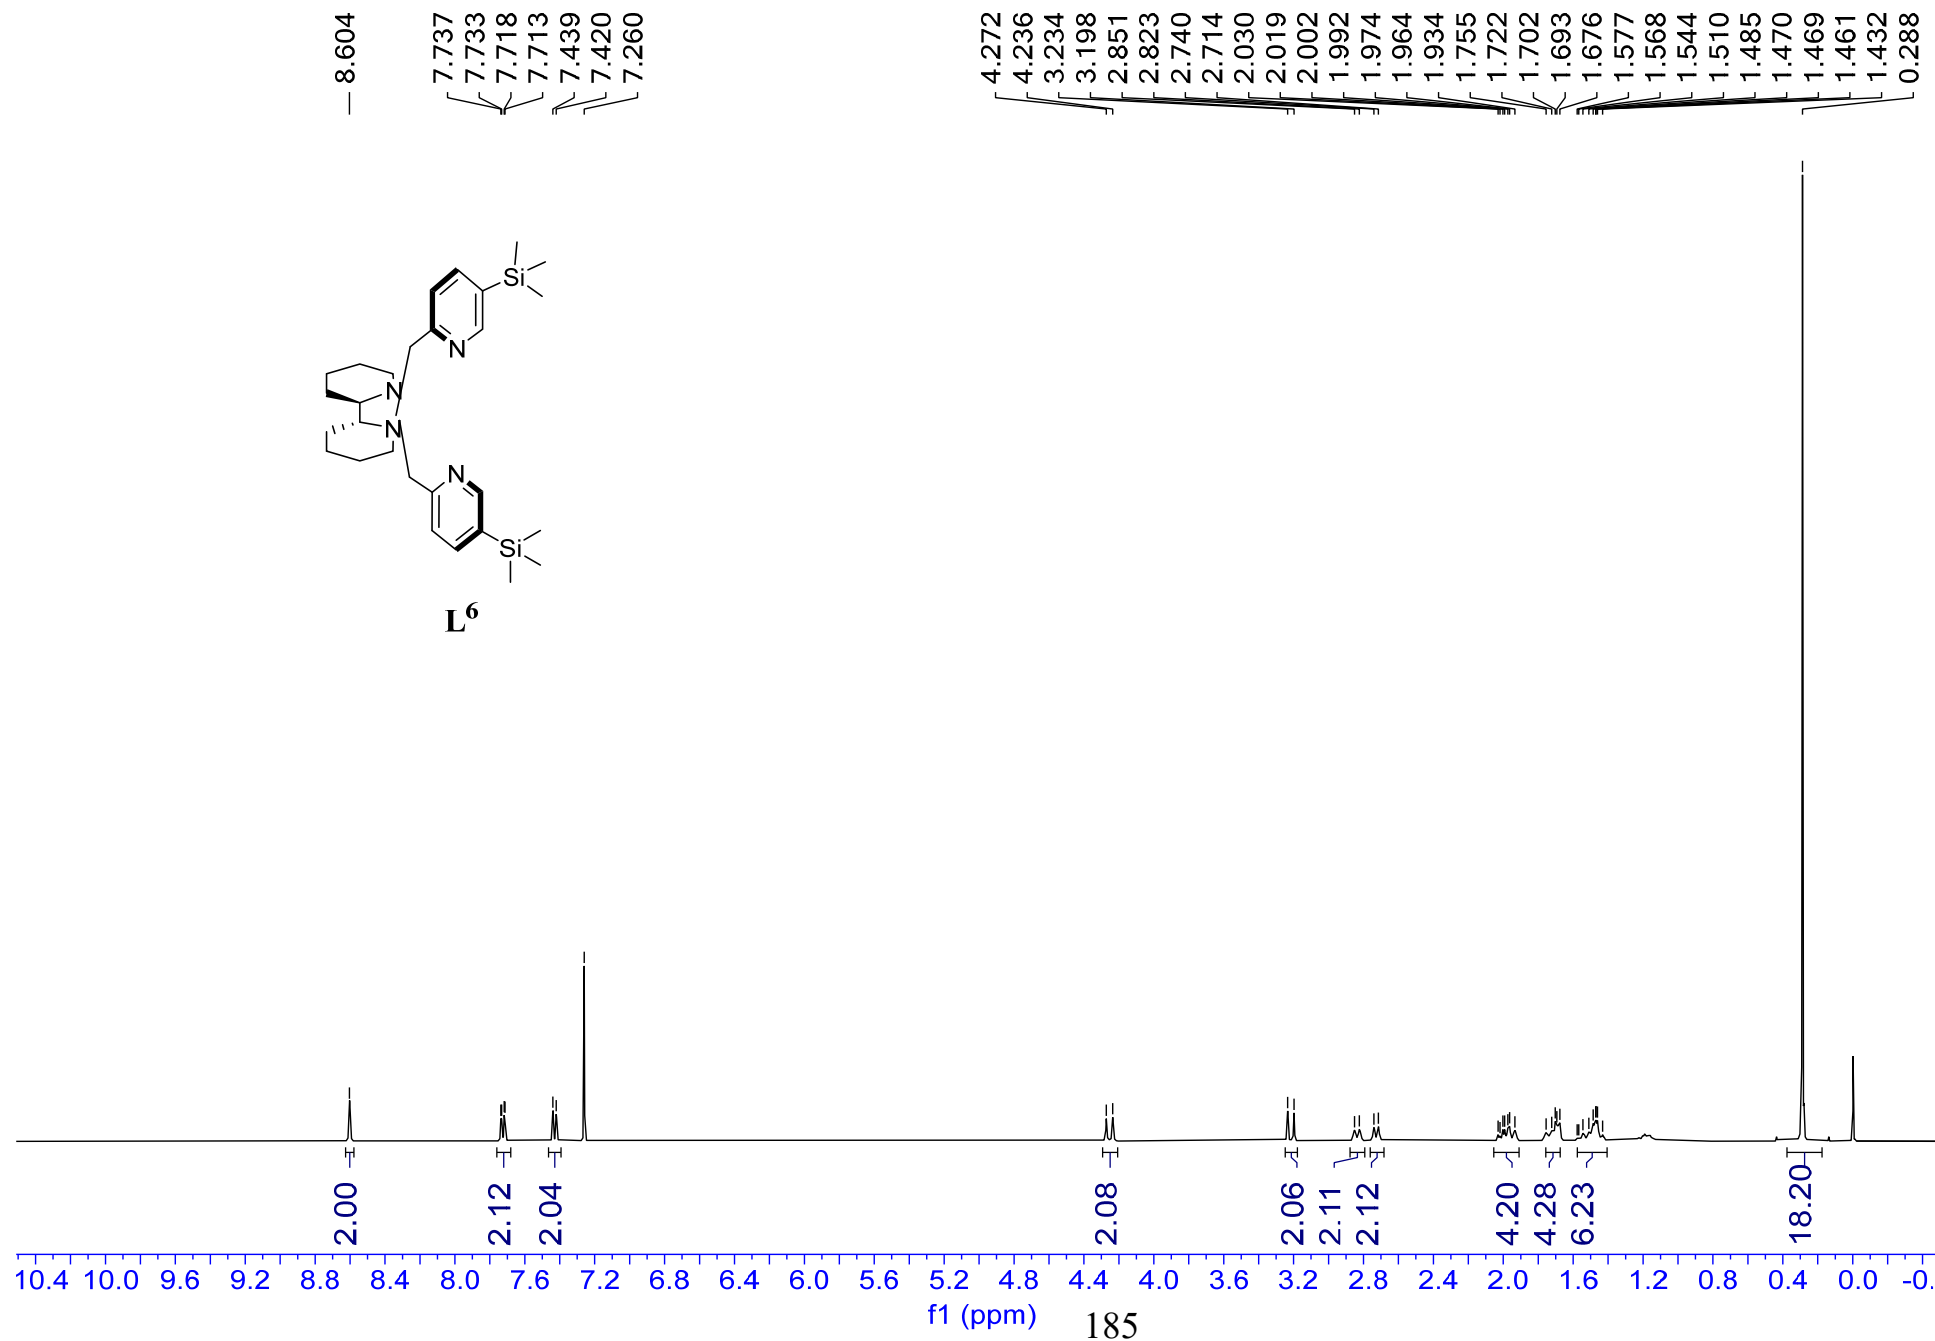

$^{13}\text{C}$  NMR 101 MHz,  $\text{CDCl}_3$

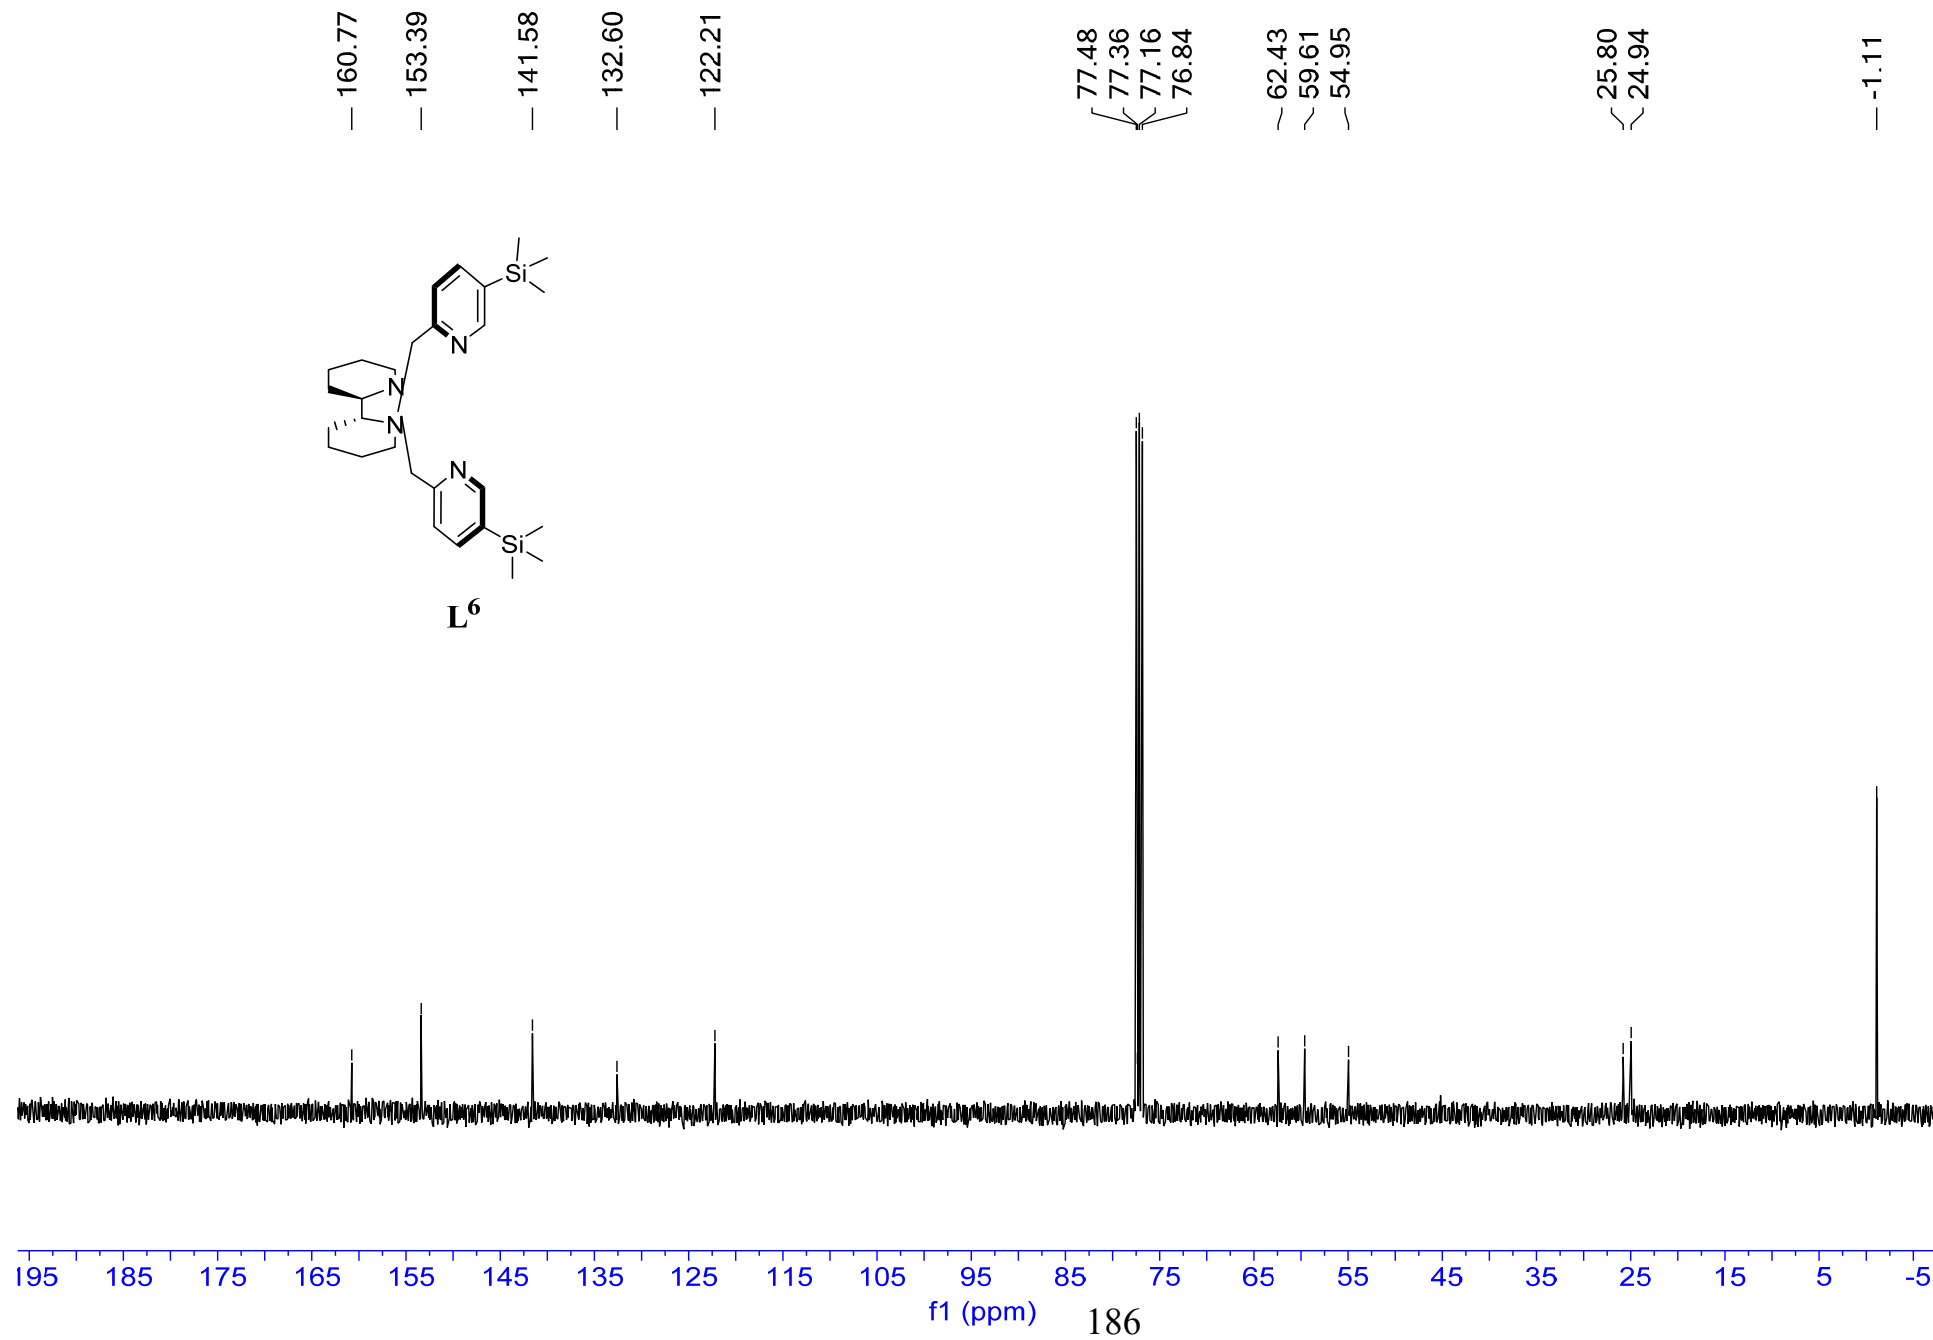

$^1\text{H}$  NMR, 400 MHz,  $\text{CDCl}_3$

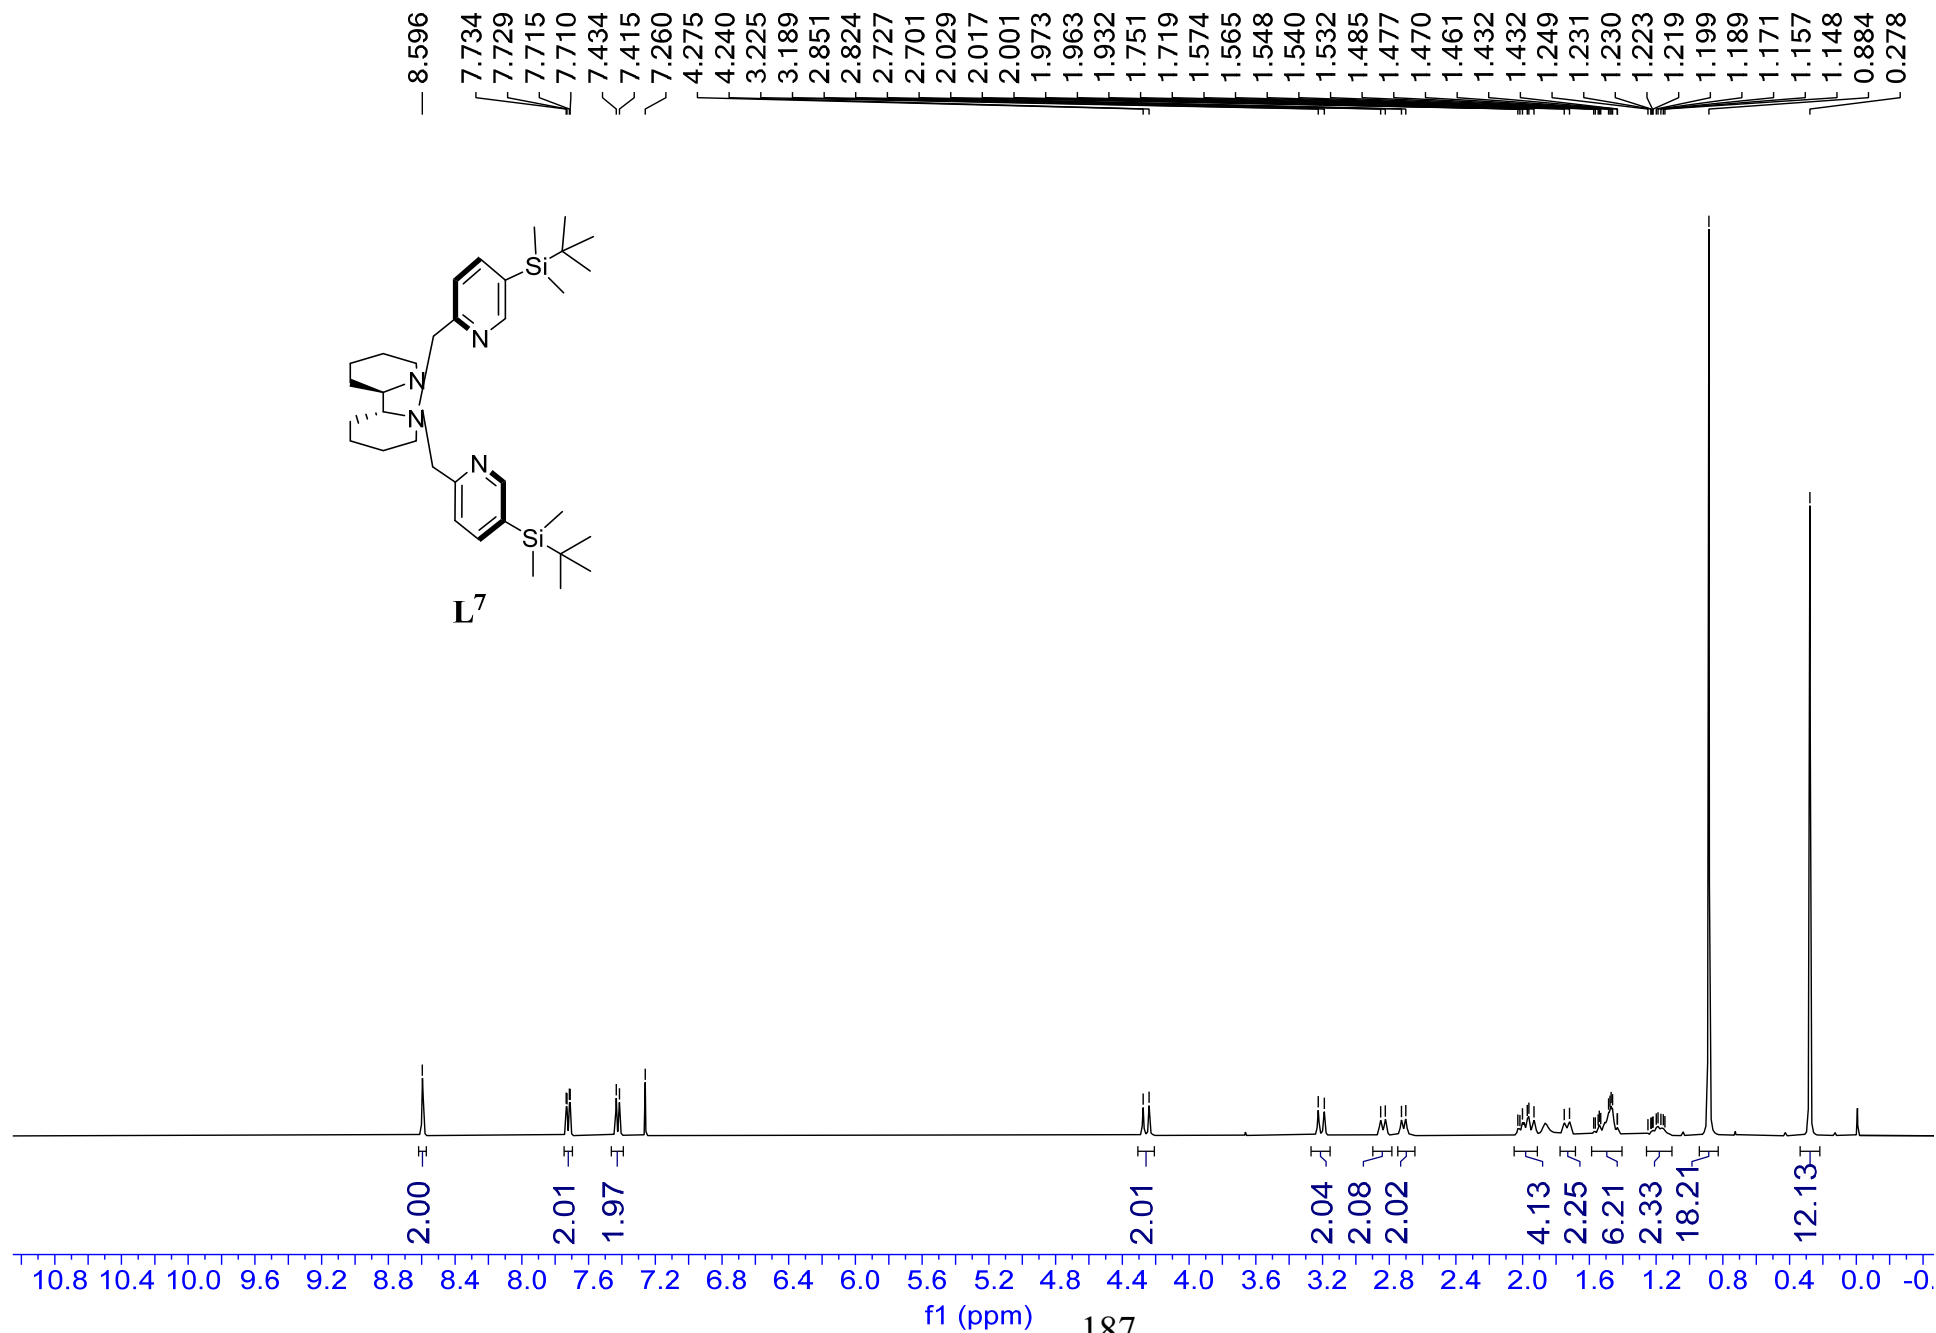

$^{13}\text{C}$  NMR 101 MHz,  $\text{CDCl}_3$

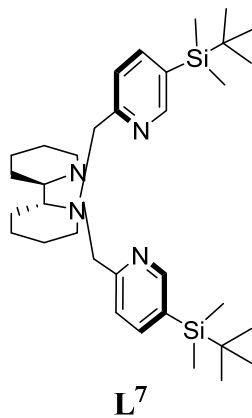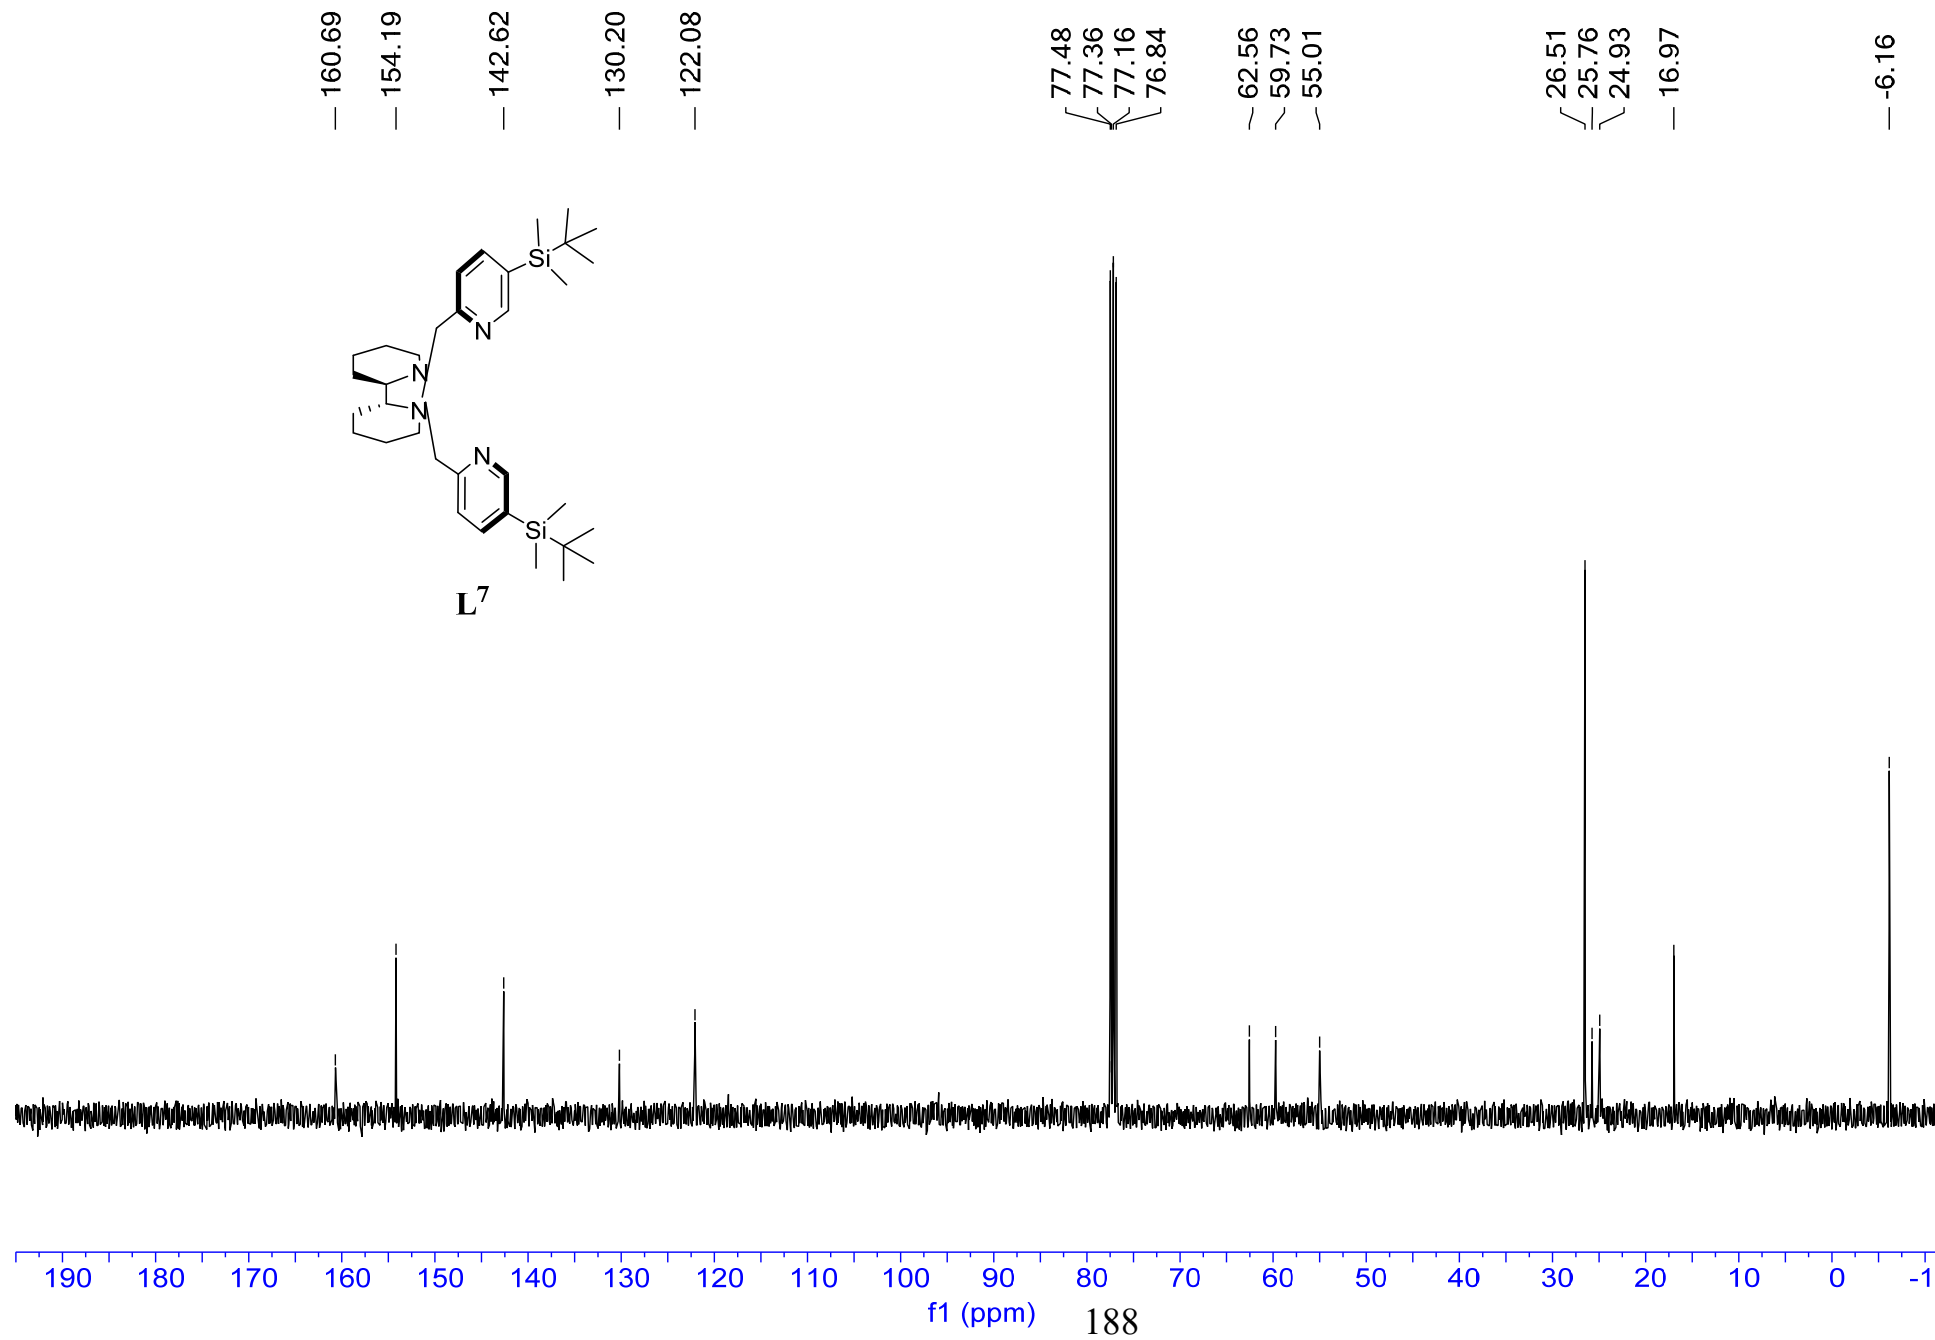



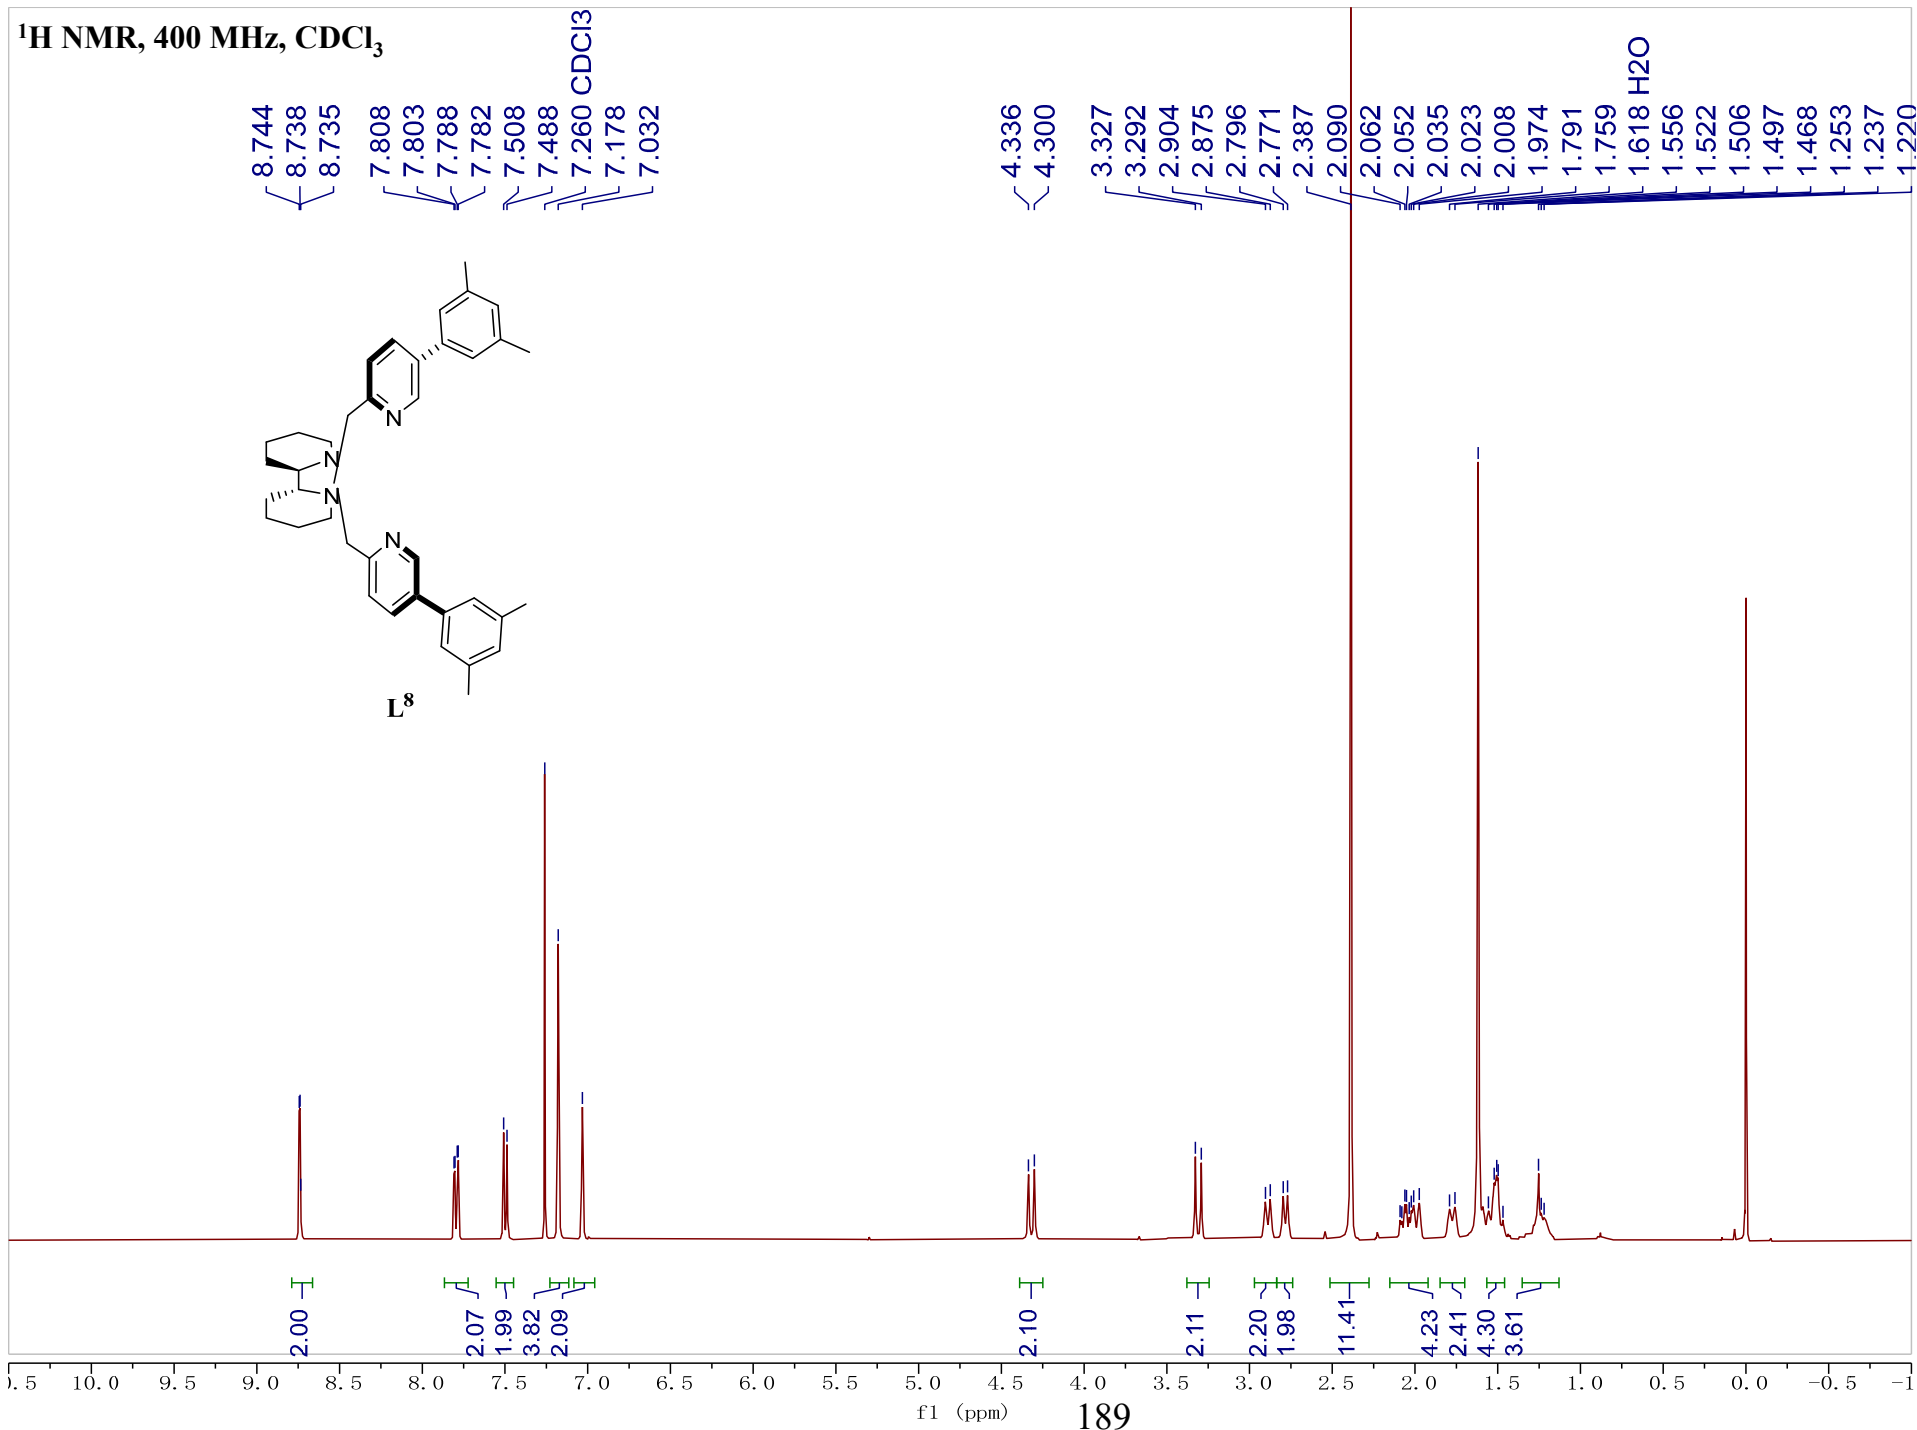

<sup>13</sup>C NMR 101 MHz, CDCl<sub>3</sub>

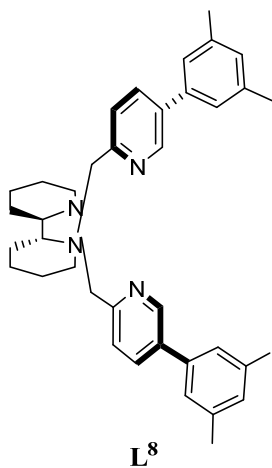

— 158.92  
— 147.48  
138.60  
137.94  
134.92  
134.83  
129.52  
124.98  
122.53

77.48  
77.16  
76.84

— 62.39  
— 59.24  
— 54.81

25.65  
25.07  
24.83  
21.44

10 200 190 180 170 160 150 140 130 120 110 100 90 80 70 60 50 40 30 20 10 0 -1

f1 (ppm)

190

<sup>1</sup>H NMR, 400 MHz, CDCl<sub>3</sub>

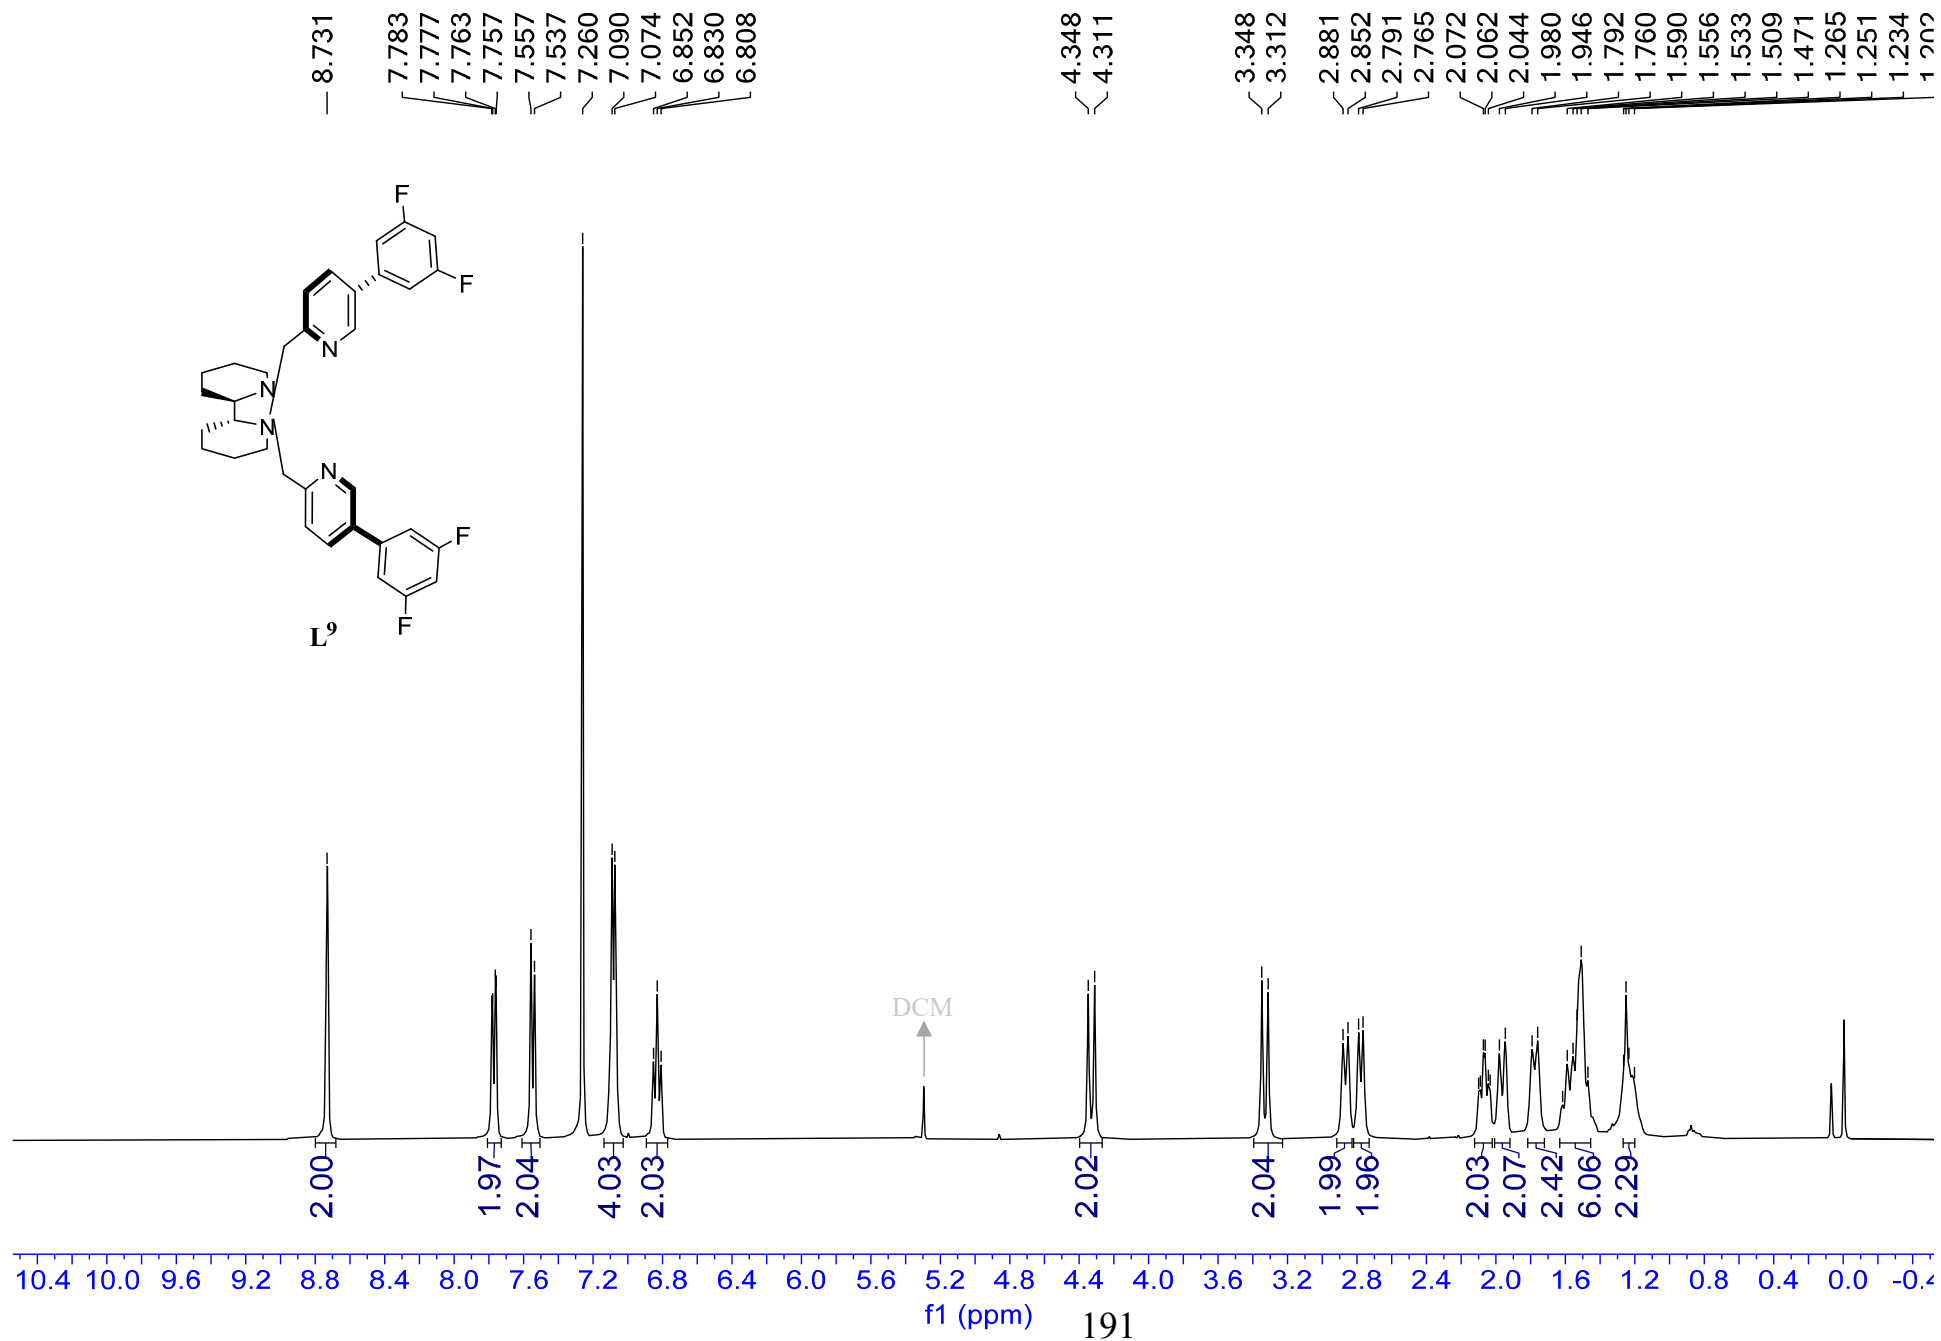

$^{13}\text{C}$  NMR 101 MHz,  $\text{CDCl}_3$

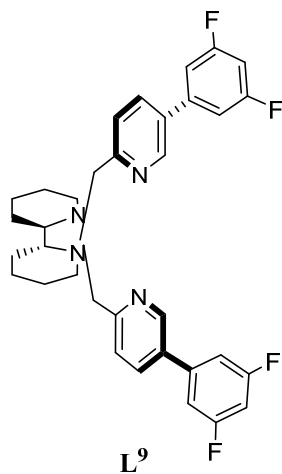

164.76  
162.42  
160.80

147.34  
141.44  
141.24  
134.80  
132.63

122.79

110.15  
109.89  
103.56  
103.06

77.48  
77.16  
76.84

62.47  
59.23  
54.95

25.65  
25.23  
24.86

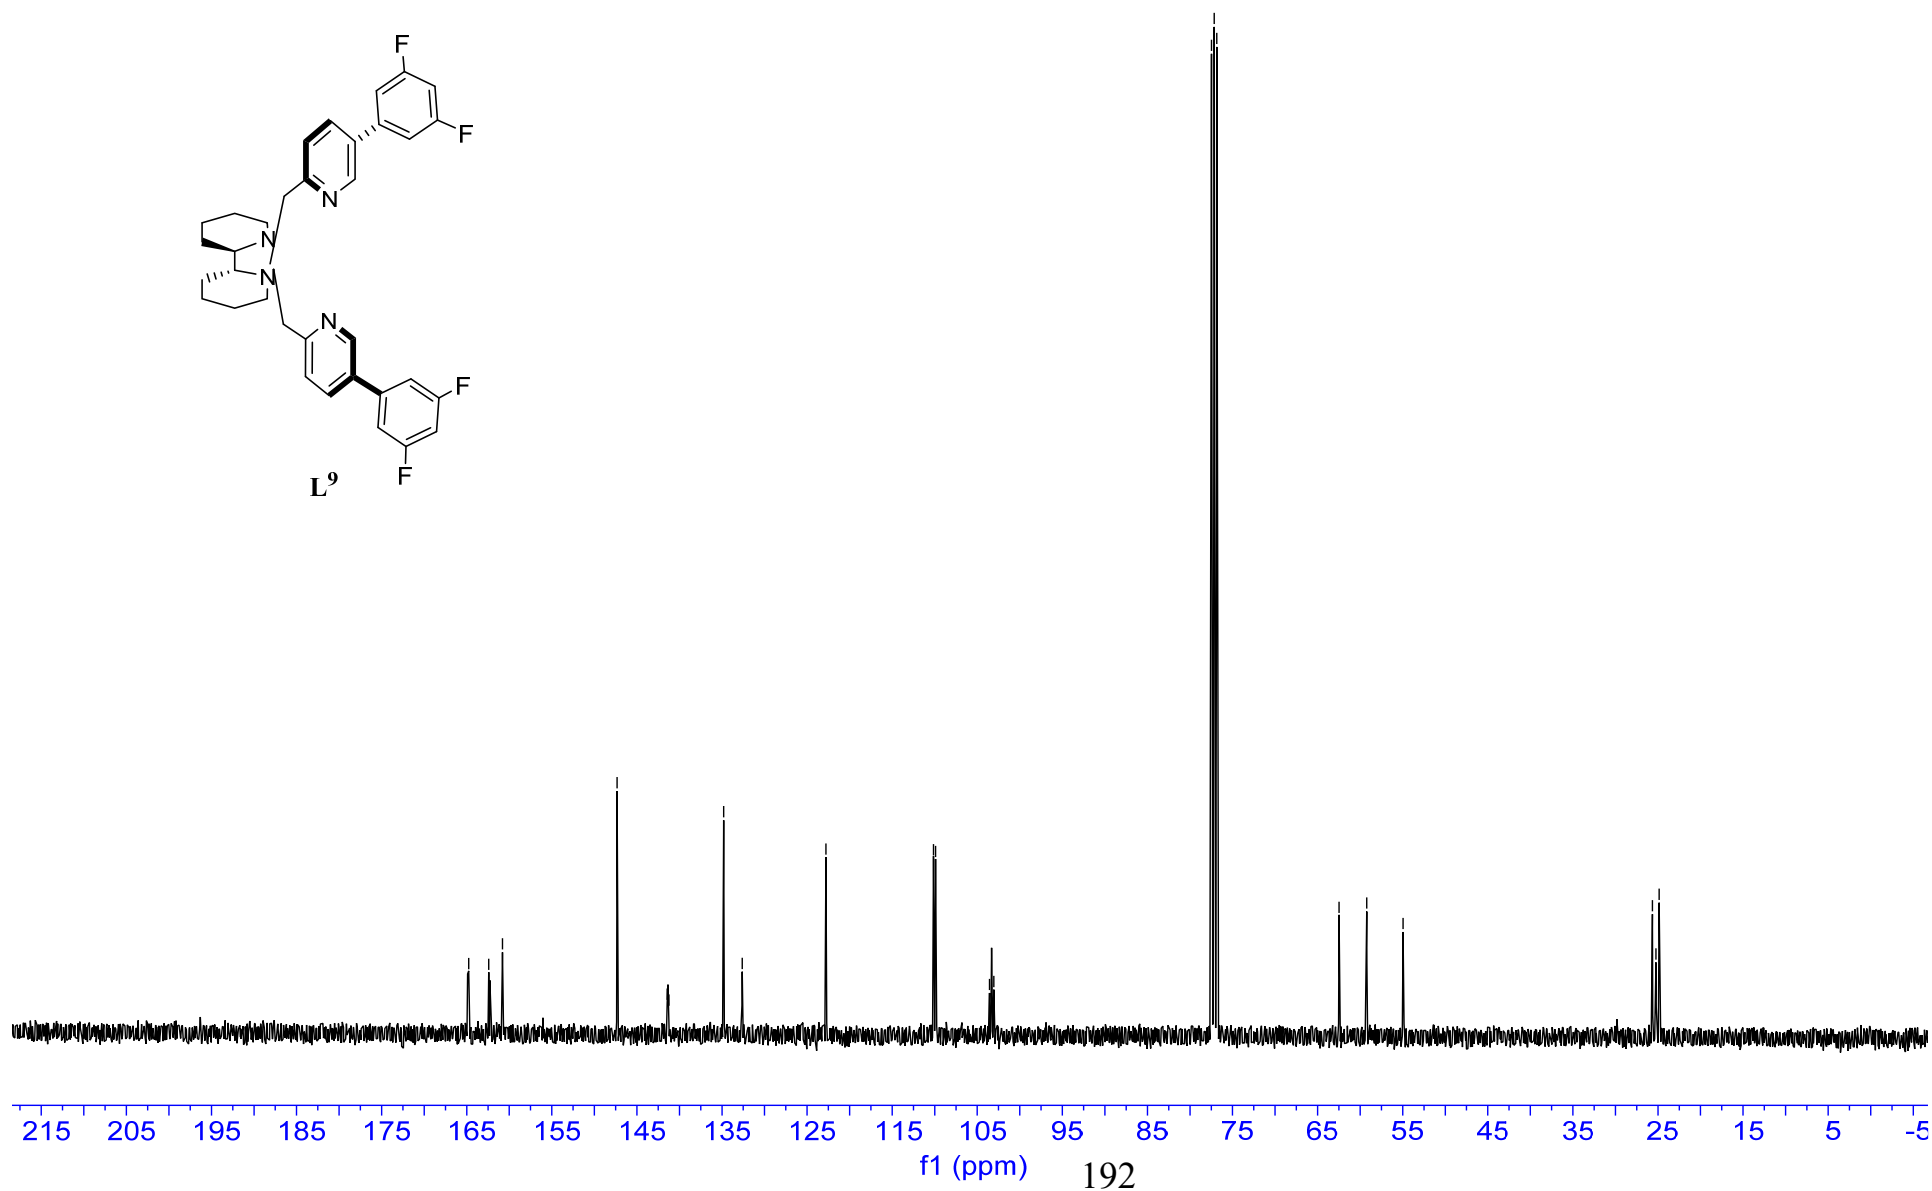

$^{13}\text{F}$  NMR 376 MHz,  $\text{CDCl}_3$



— -108.893

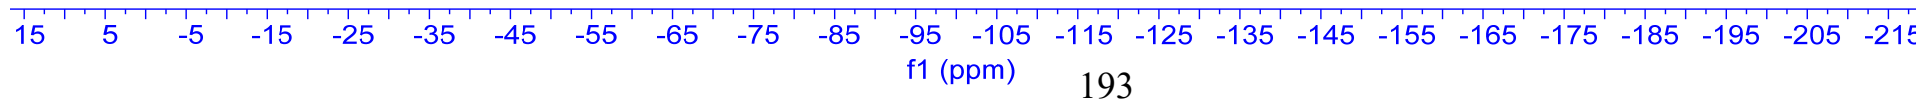

<sup>1</sup>H NMR, 400 MHz, CDCl<sub>3</sub>

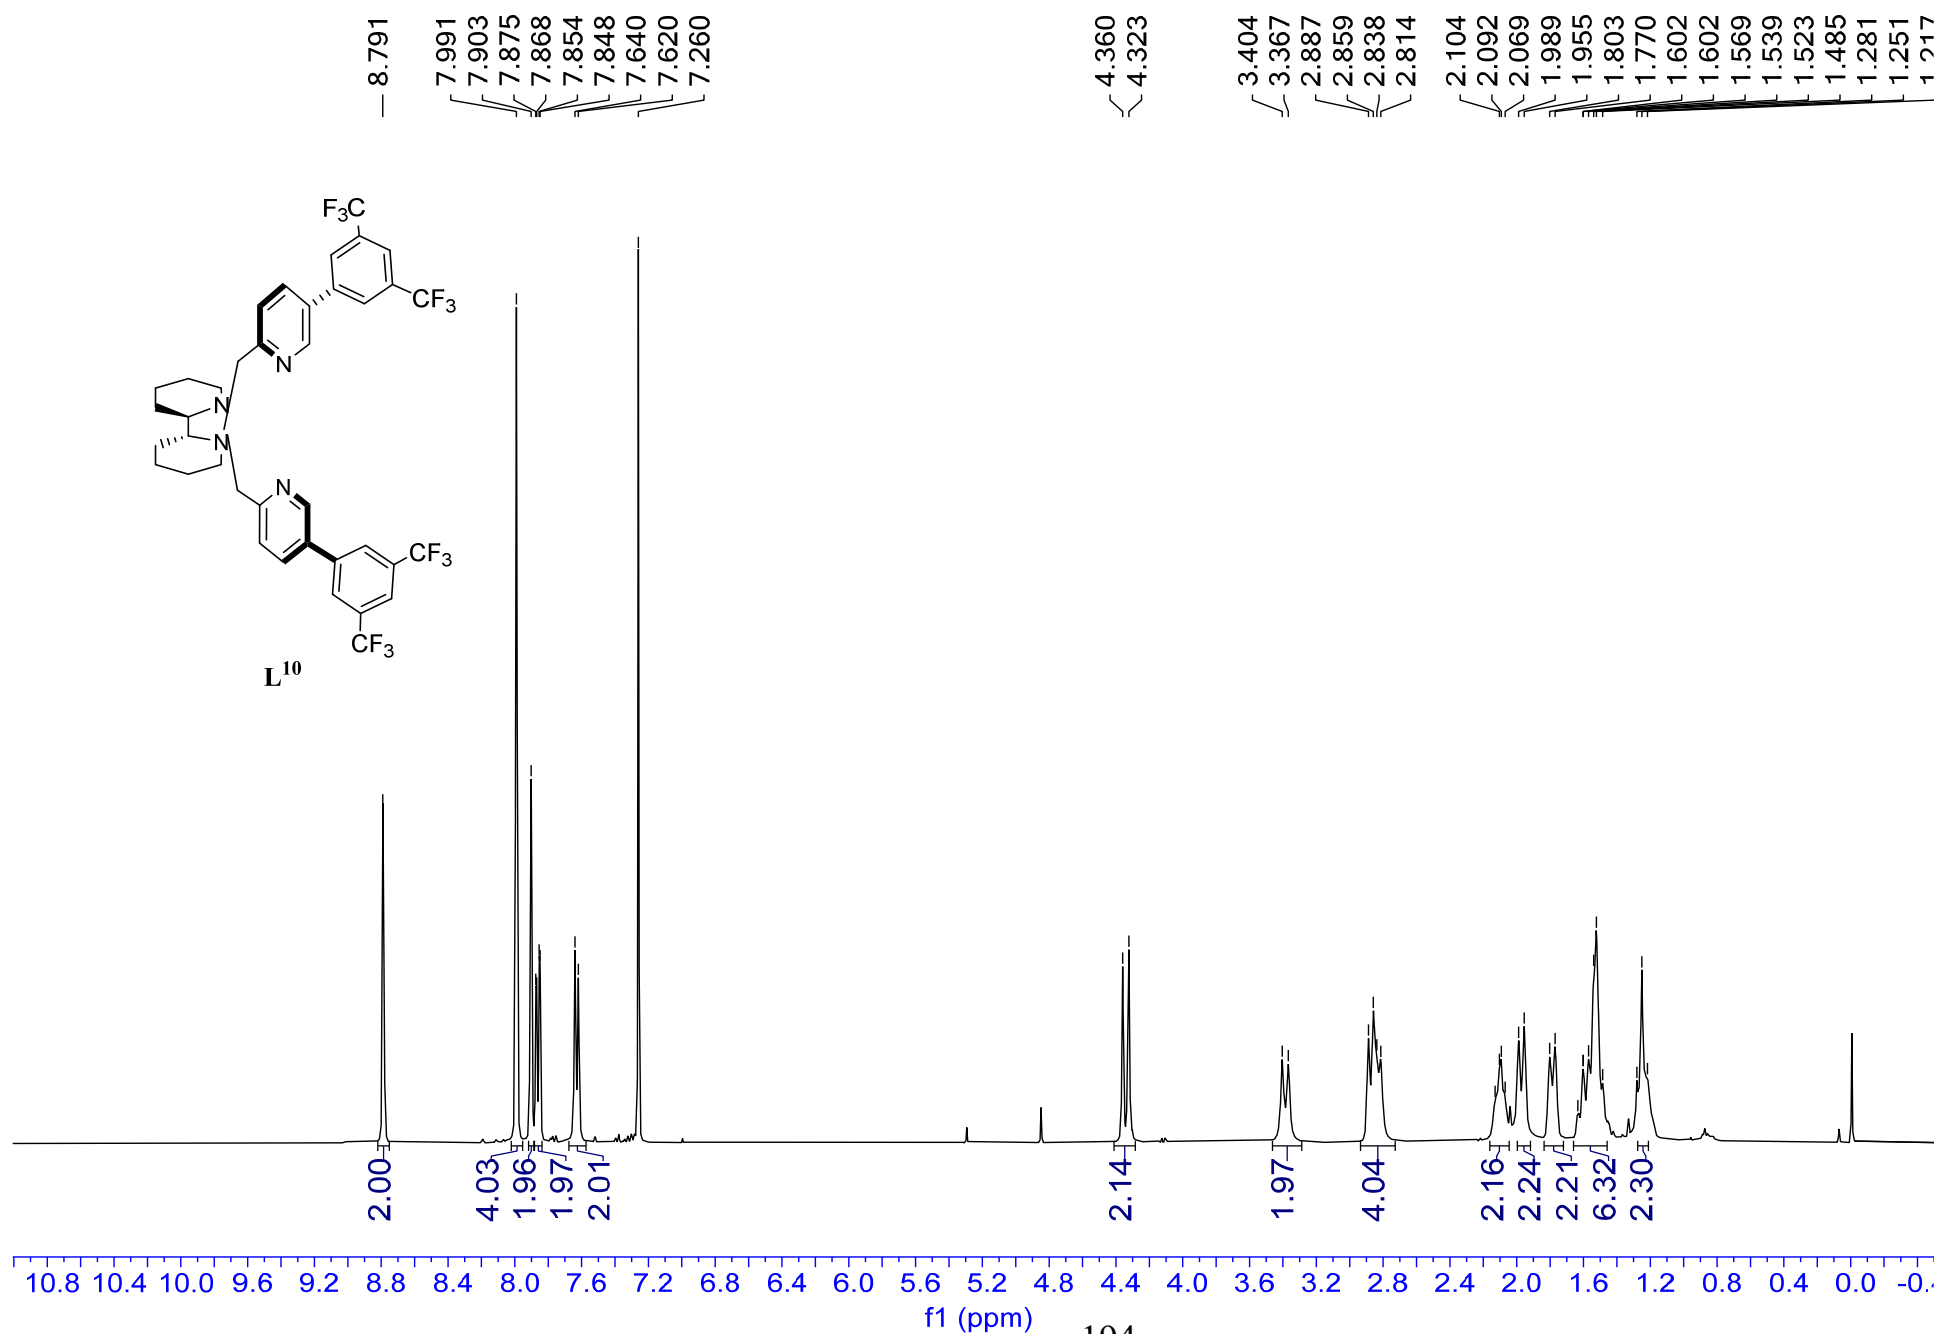

[illegible]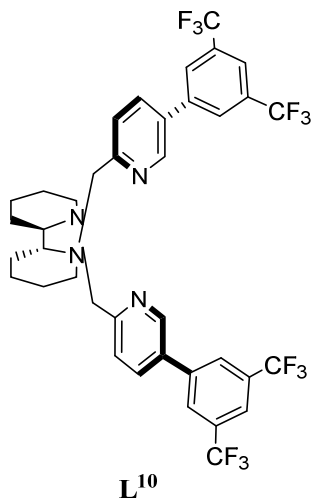

**L<sup>10</sup>**

**$^{13}\text{F}$  NMR 376 MHz,  $\text{CDCl}_3$**

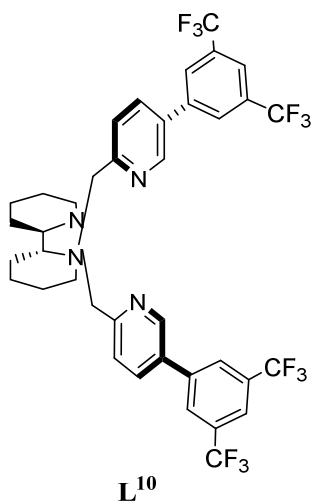

— -62.893

-36 -38 -40 -42 -44 -46 -48 -50 -52 -54 -56 -58 -60 -62 -64 -66 -68 -70 -72 -74 -76 -78 -80 -82 -84 -86 -88

f1 (ppm)

196



<sup>1</sup>H NMR, 400 MHz, CDCl<sub>3</sub>

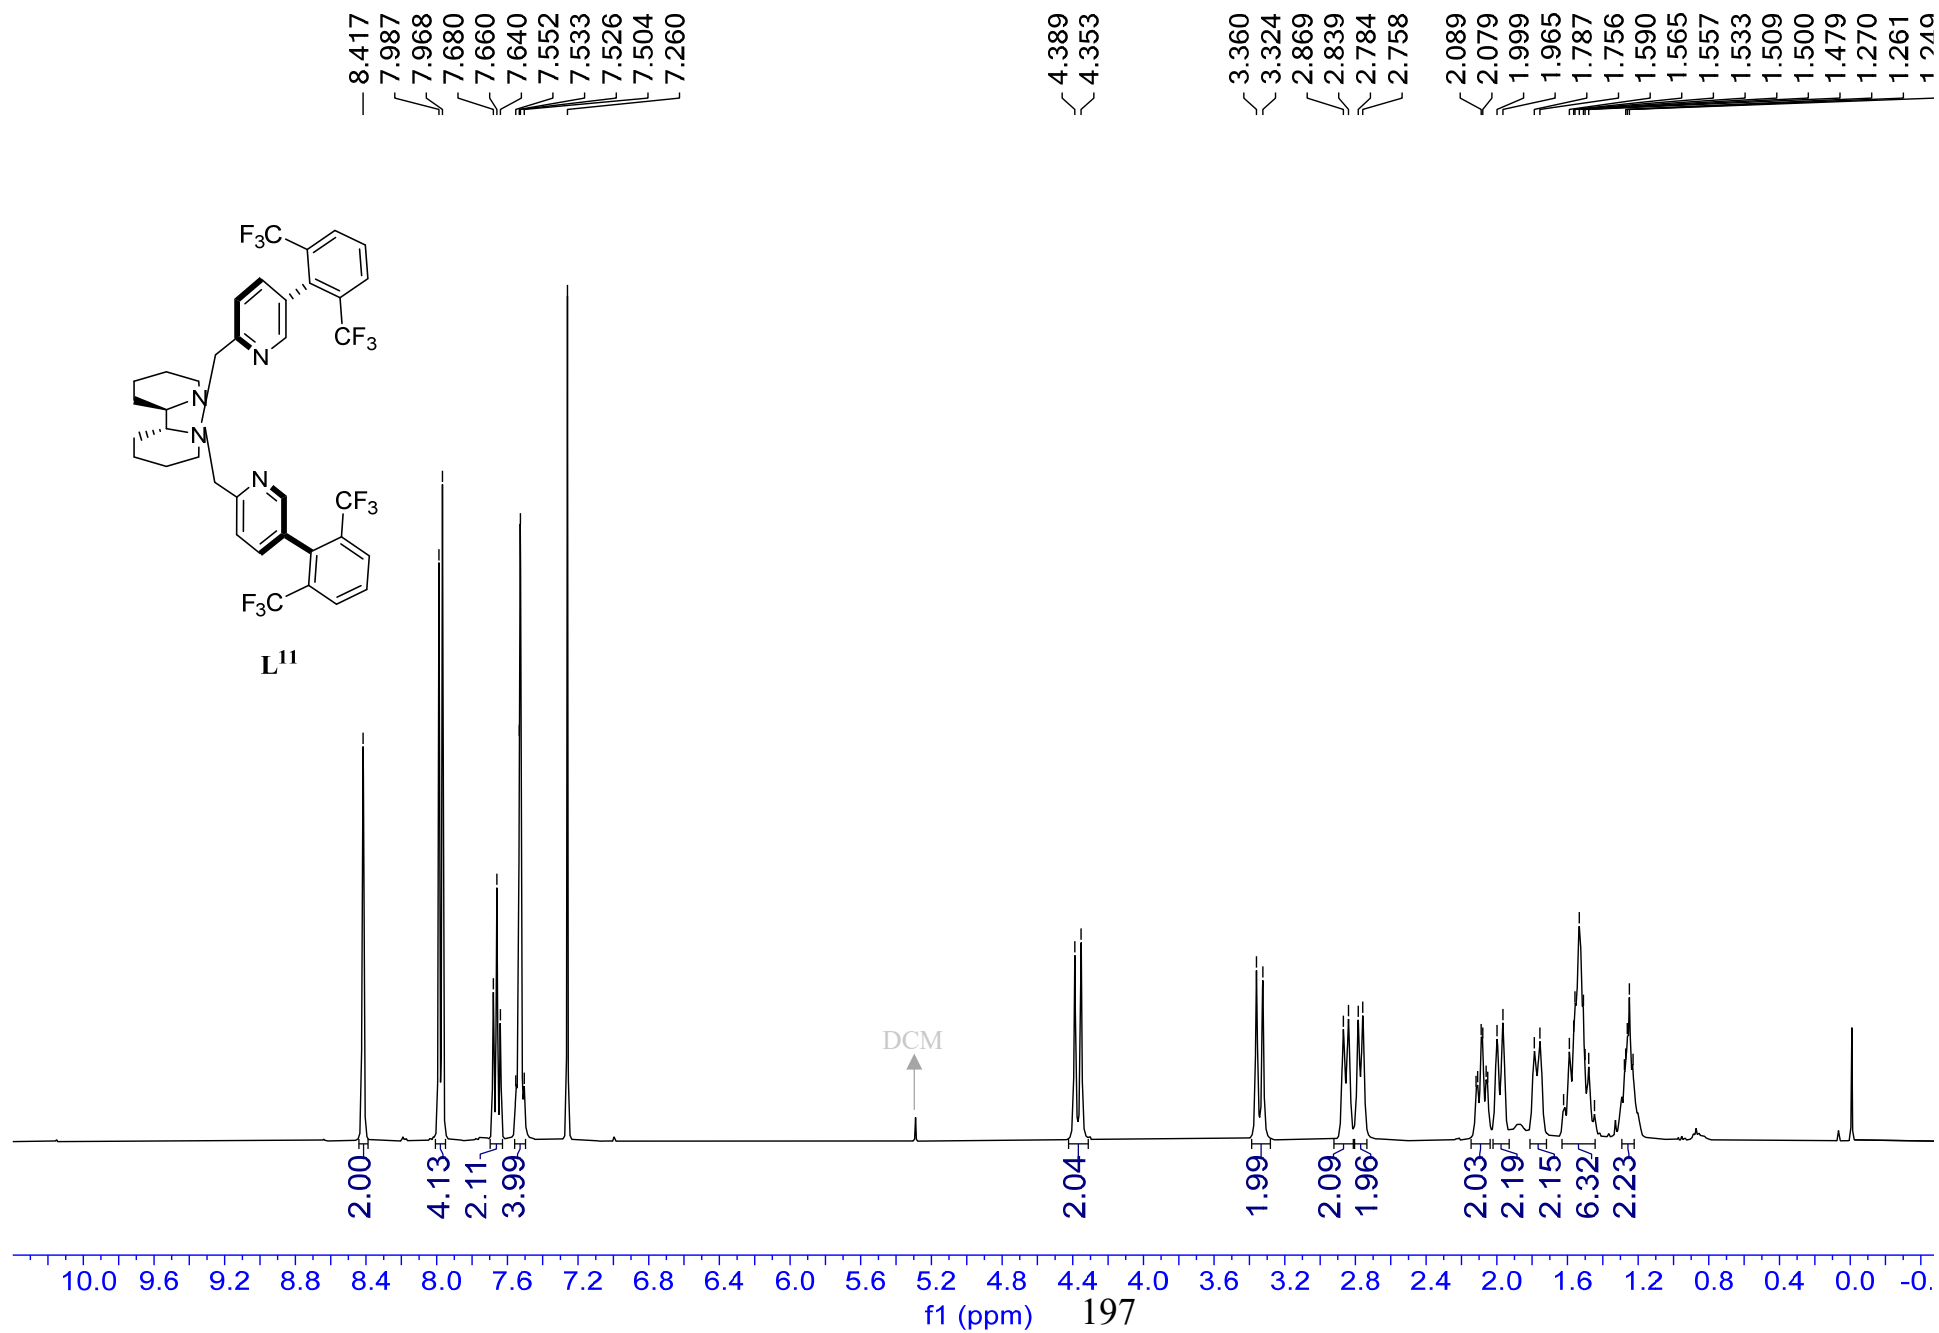

$^{13}\text{C}$  NMR 101 MHz,  $\text{CDCl}_3$

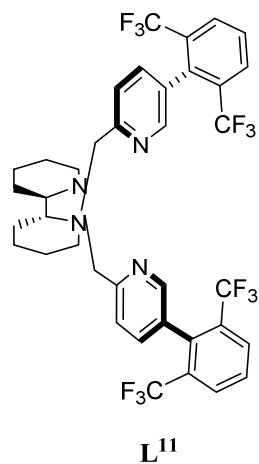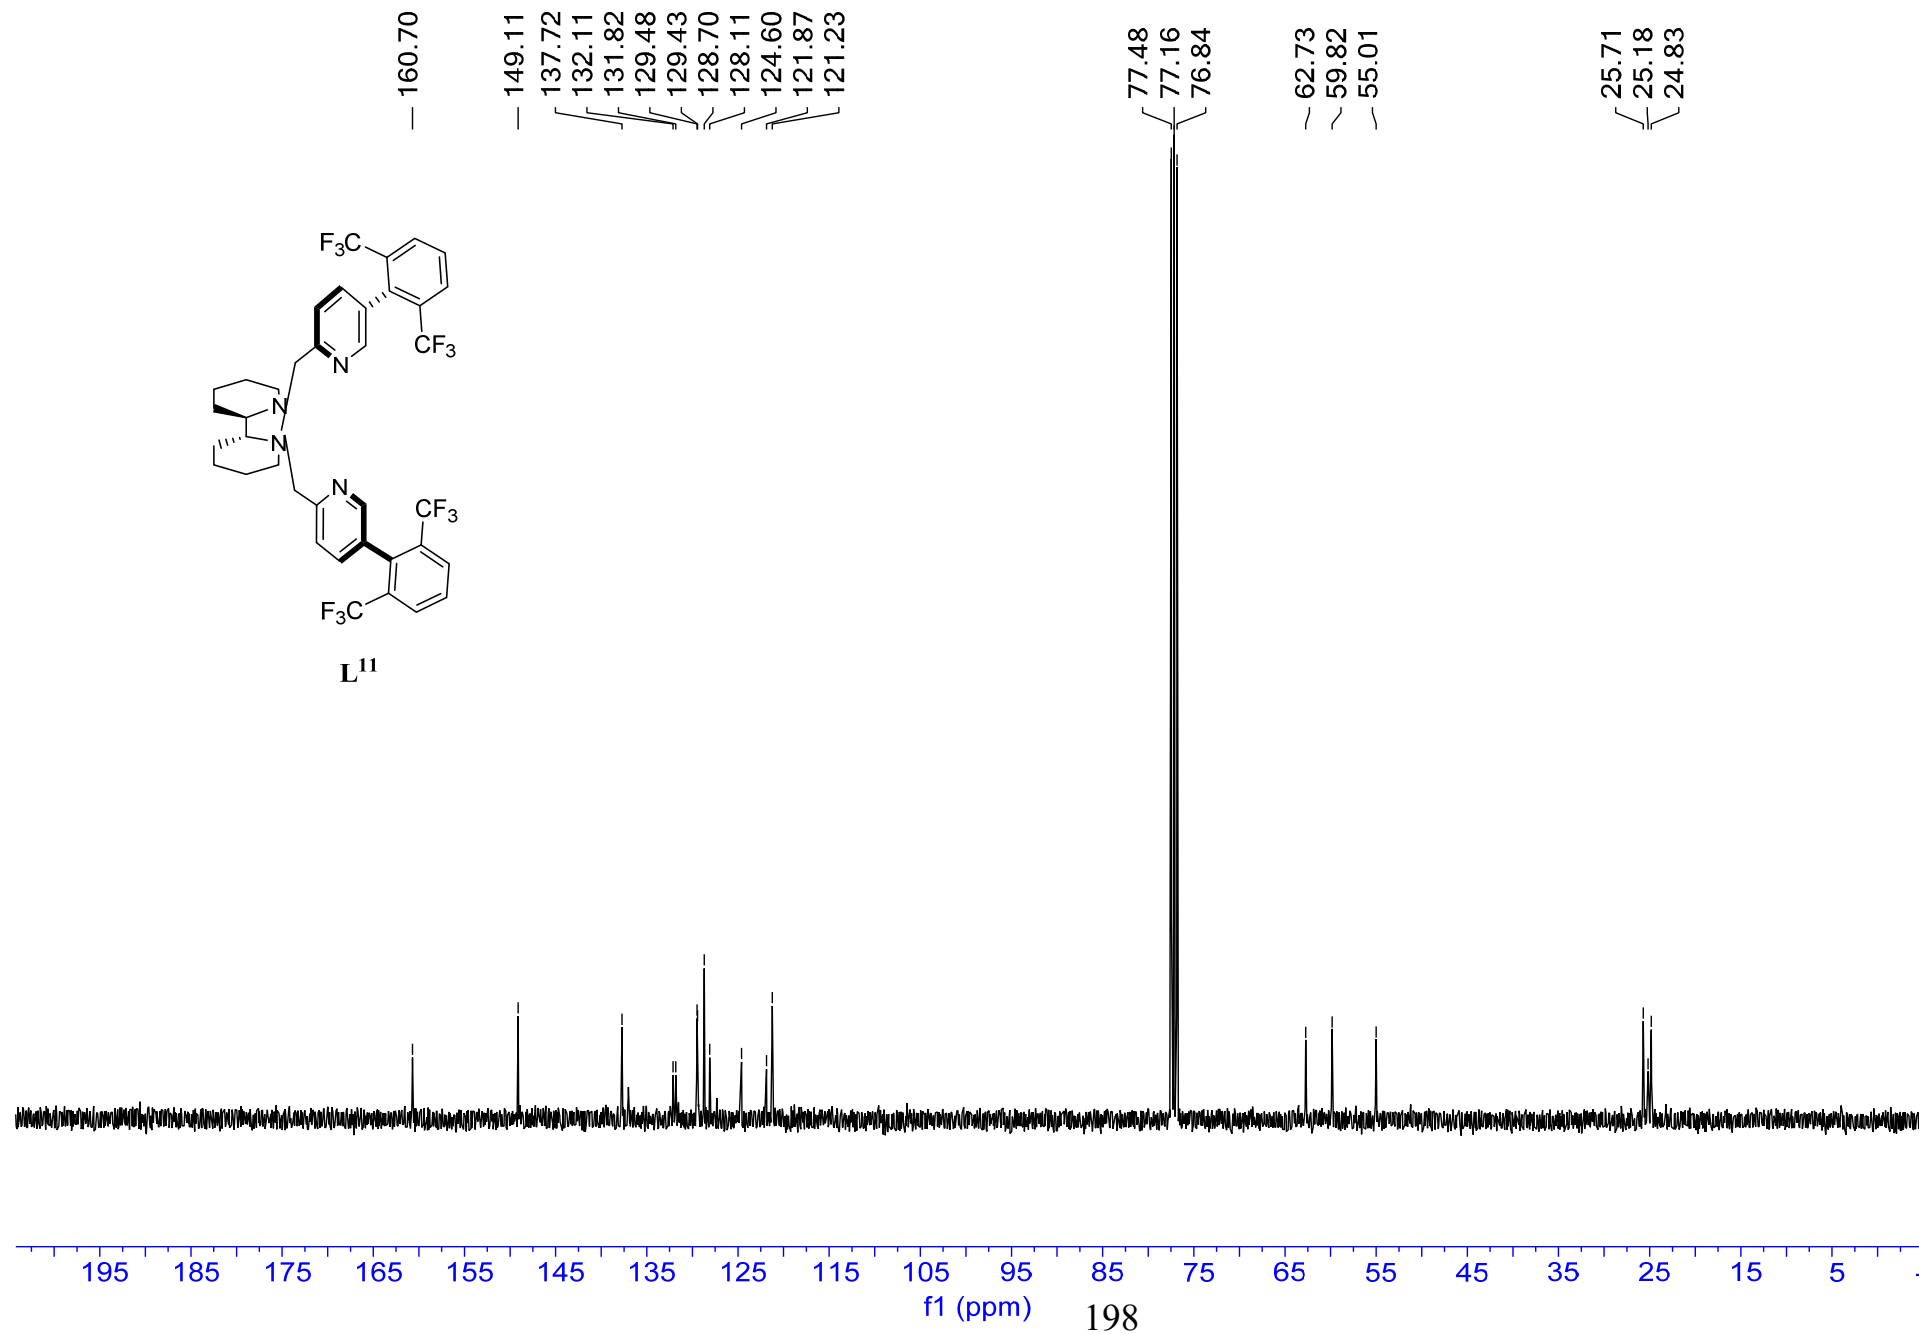

$^{13}\text{F}$  NMR 376 MHz,  $\text{CDCl}_3$

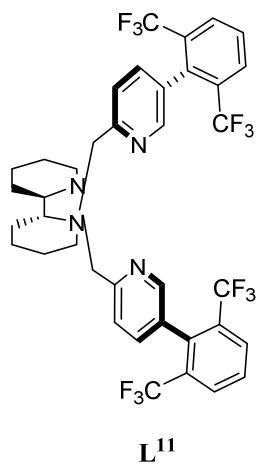

— -57.402

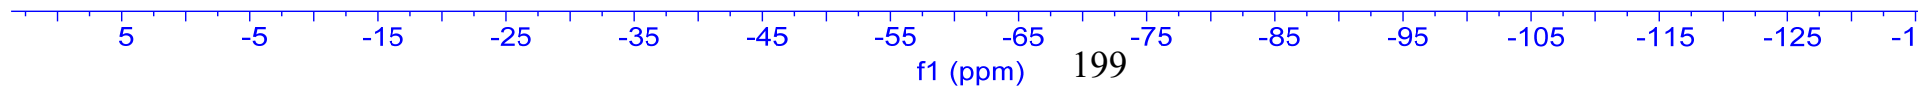

$^1\text{H}$  NMR, 400 MHz,  $\text{CDCl}_3$

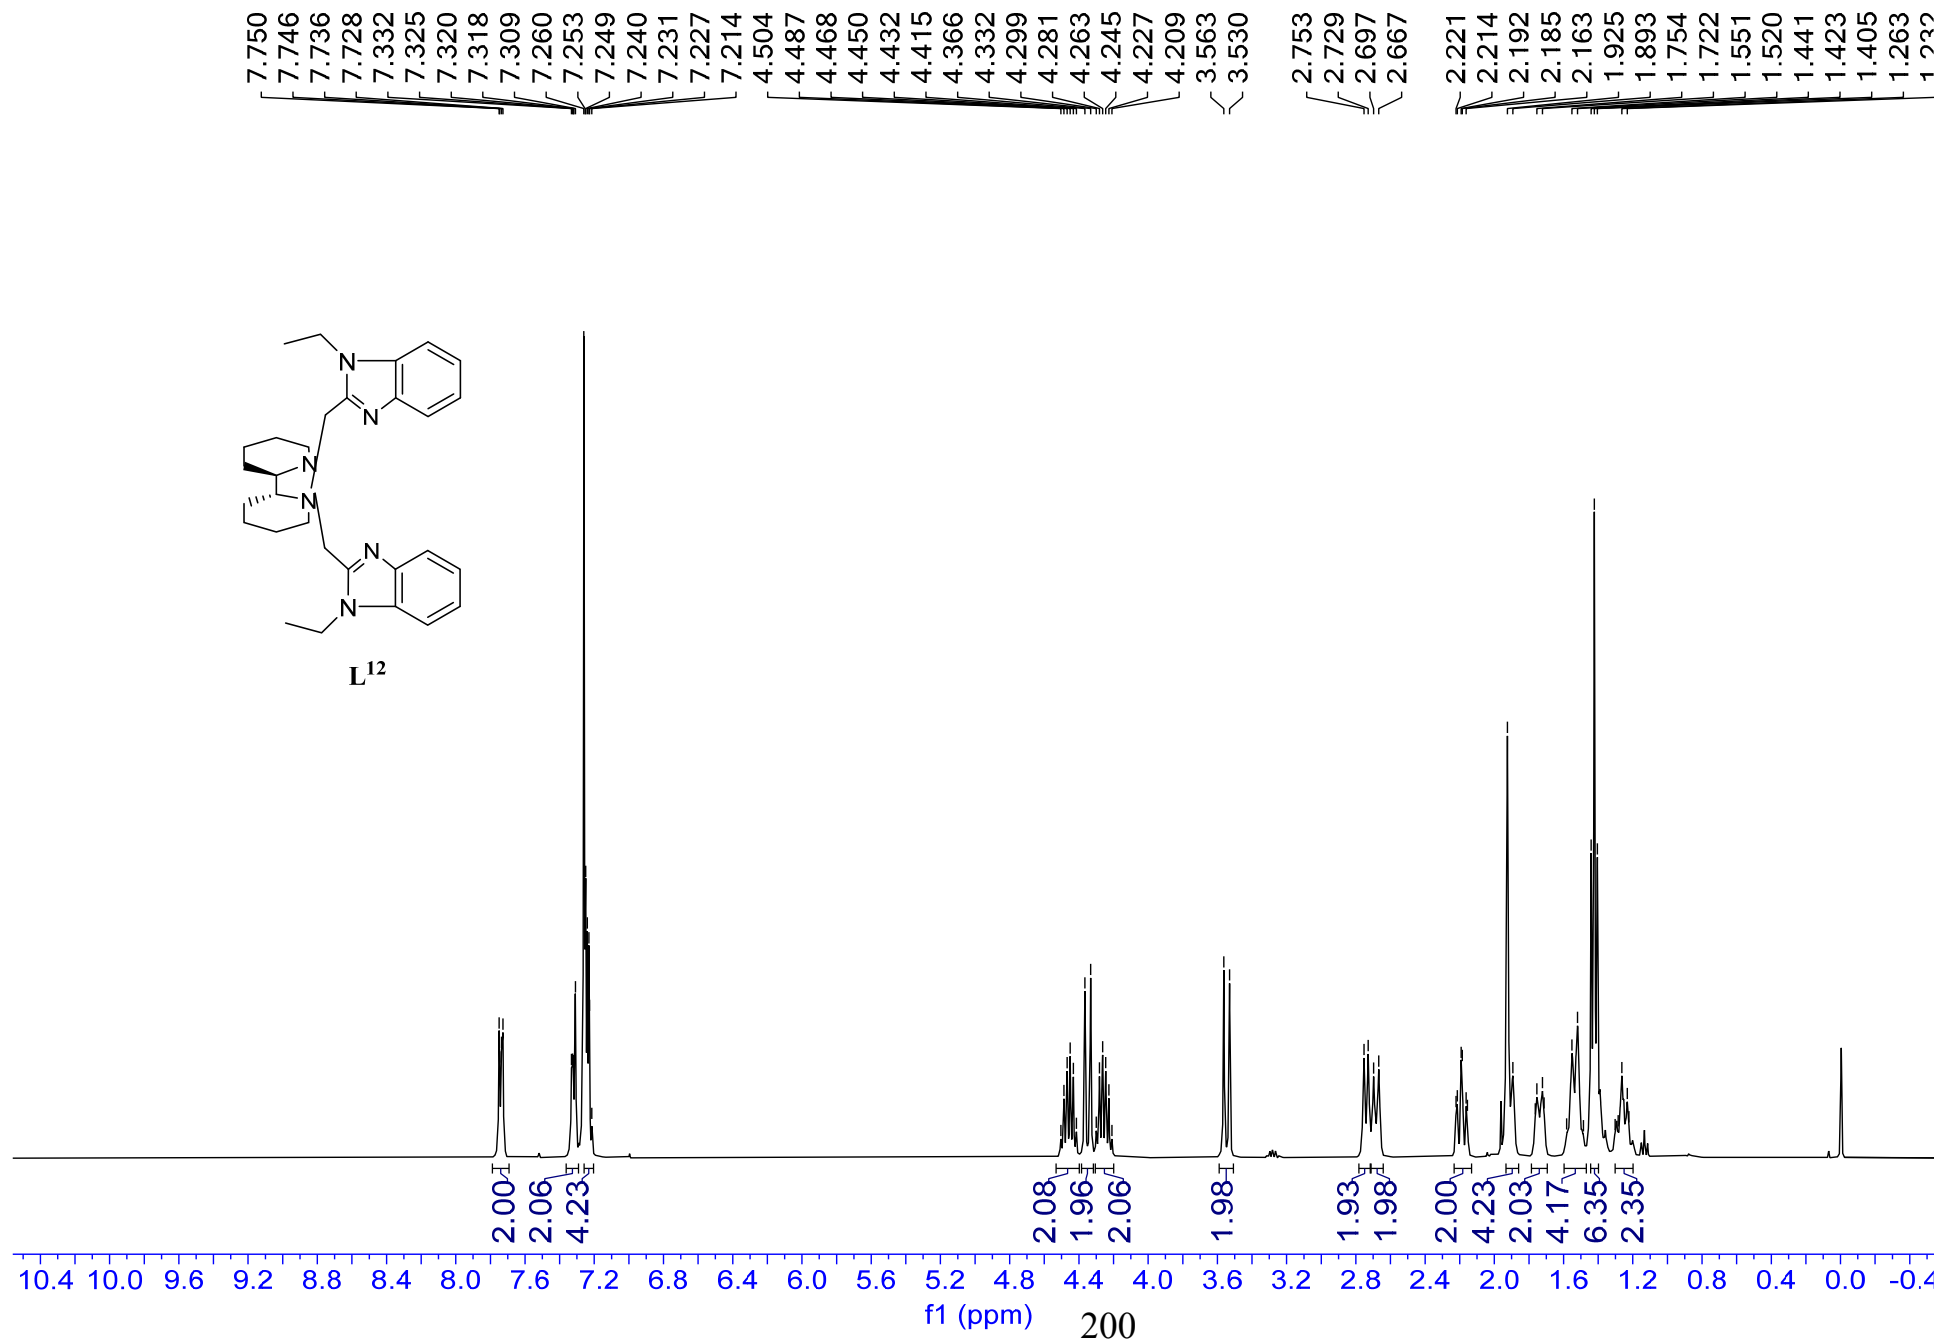

$^{13}\text{C}$  NMR 101 MHz,  $\text{CDCl}_3$

— 151.63  
— 142.62  
— 135.26  
{ 122.48  
  121.91  
  119.71  
— 109.32  
  
{ 77.48  
  77.16  
  76.84  
— 63.78  
~ 54.66  
  52.31  
— 38.71  
{ 25.48  
  25.12  
  24.41  
— 15.11

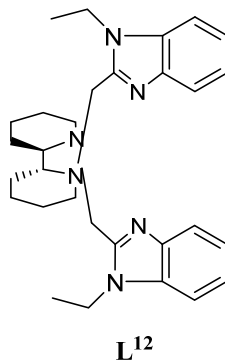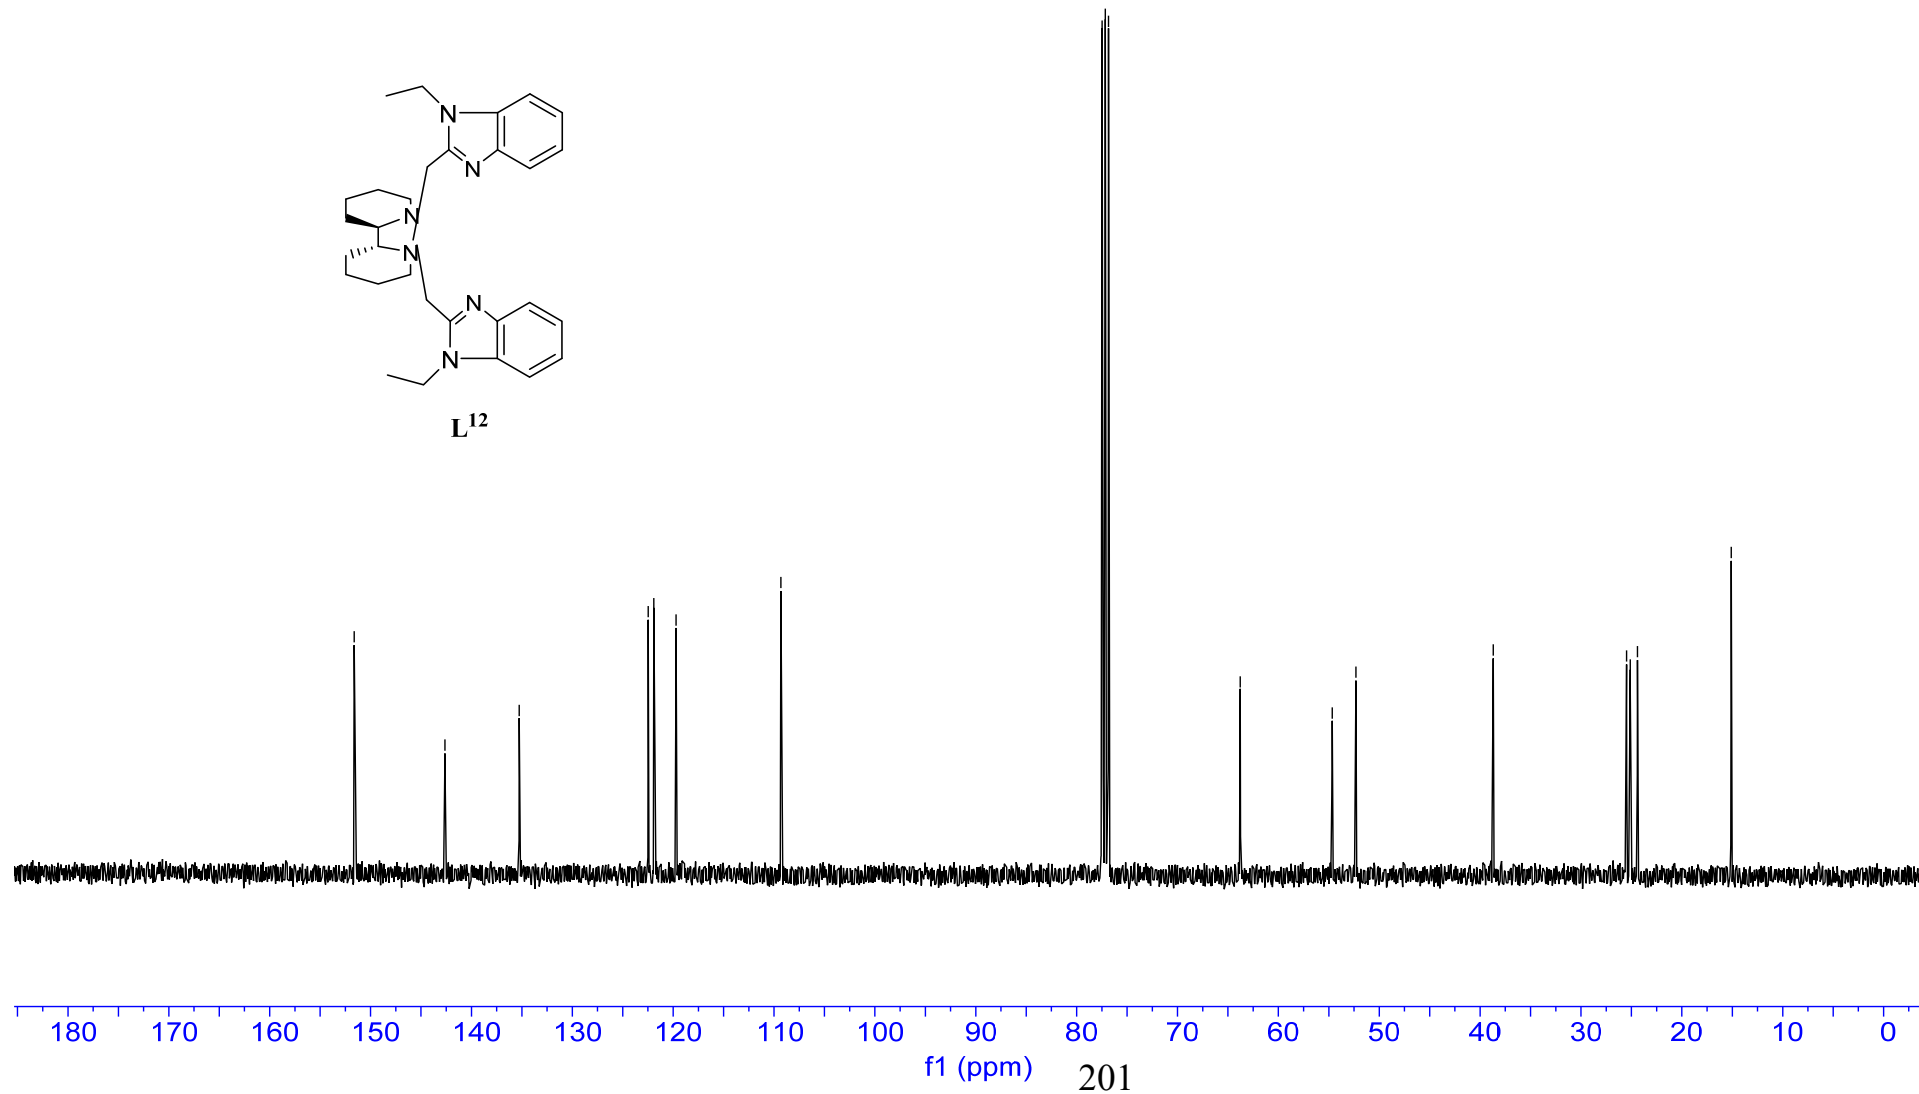

<sup>1</sup>H NMR, 400 MHz, CDCl<sub>3</sub>

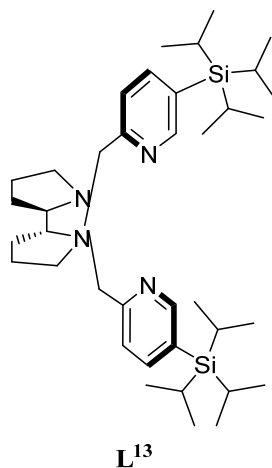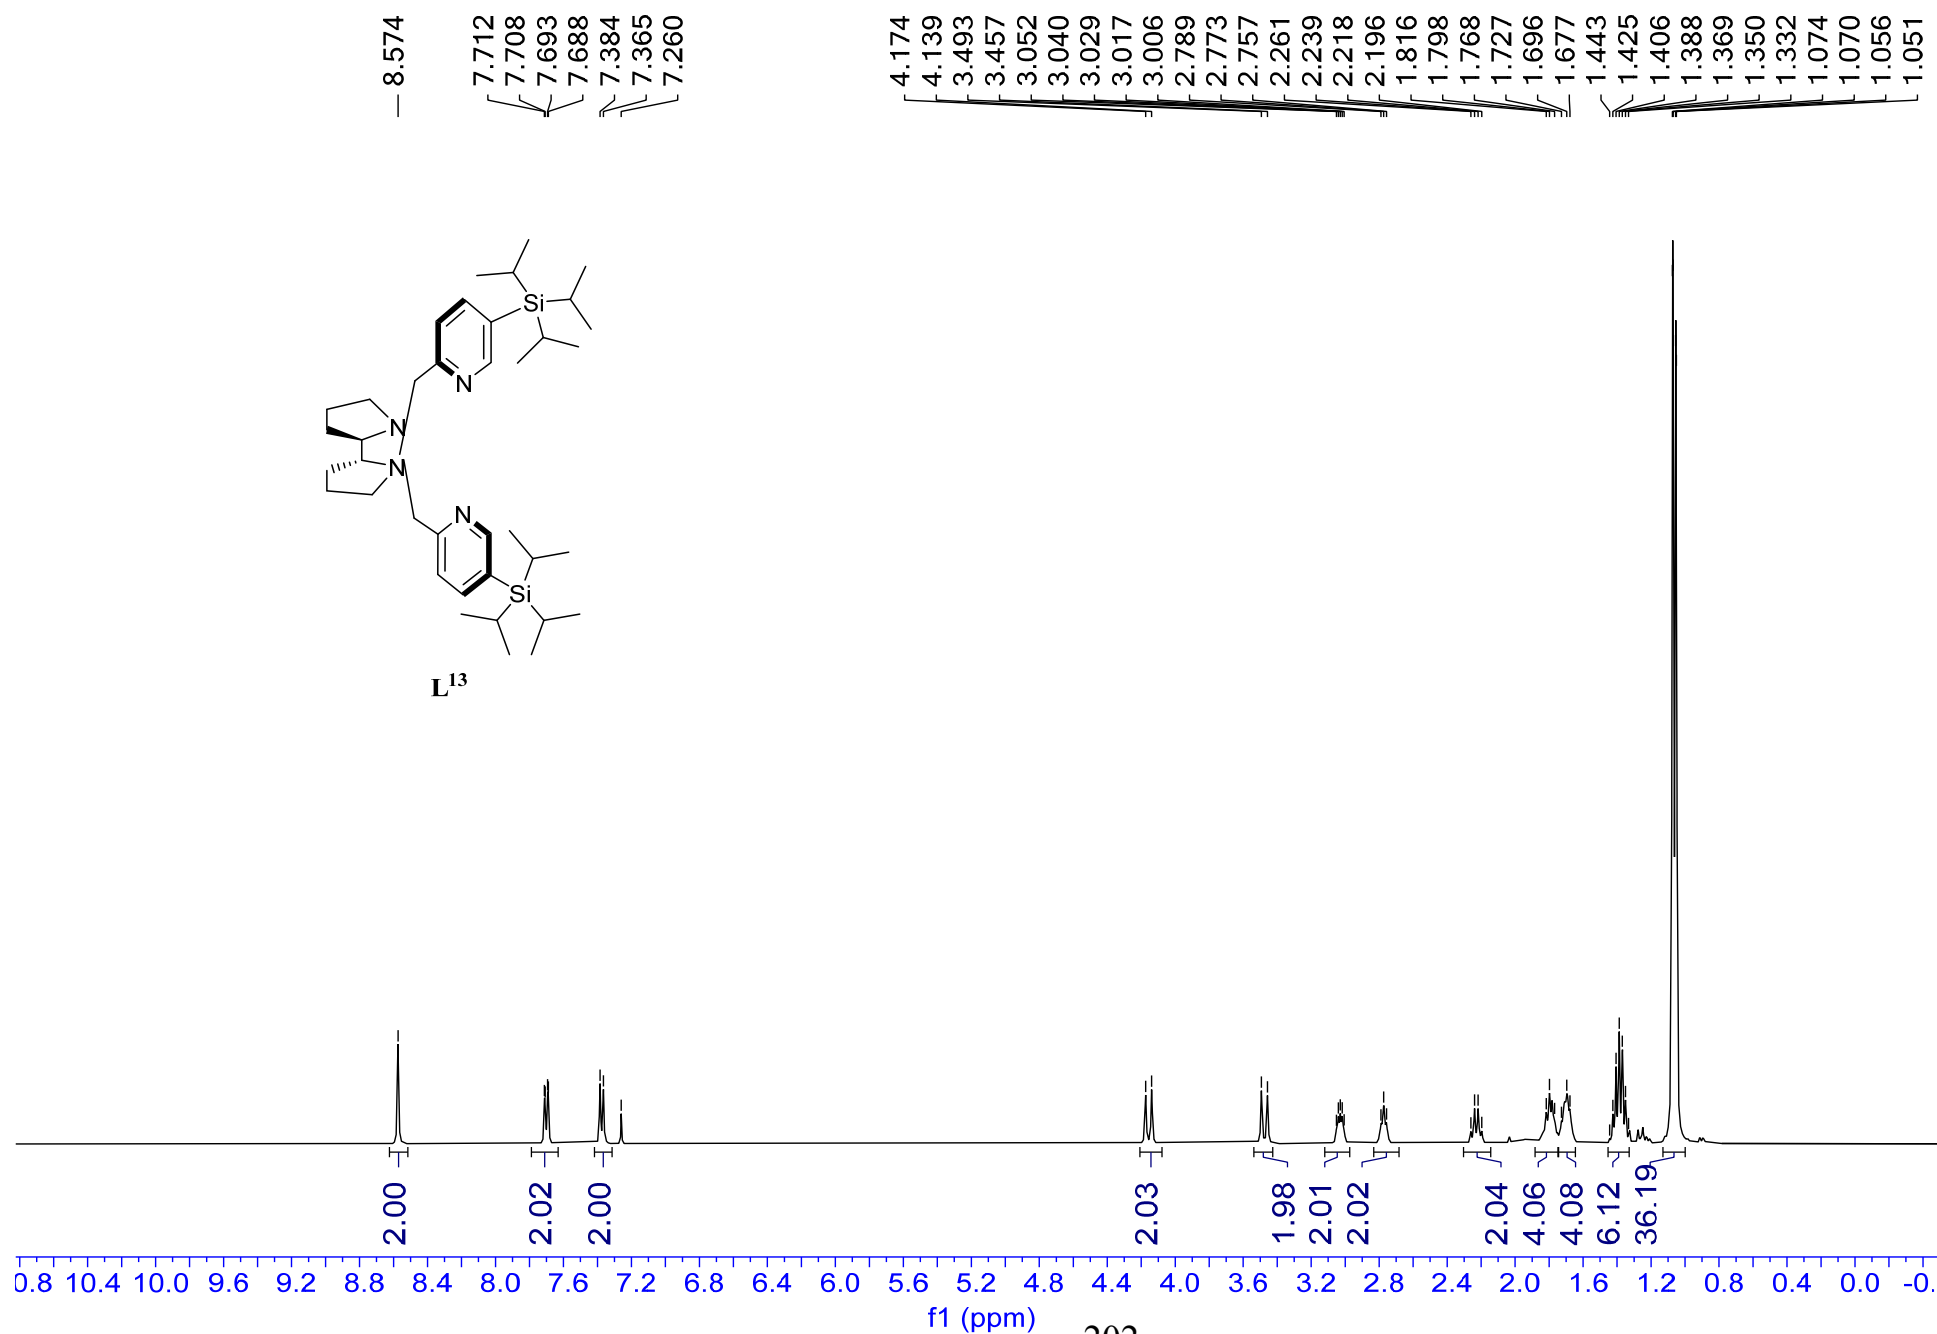

$^{13}\text{C}$  NMR 101 MHz,  $\text{CDCl}_3$

— 160.49  
— 154.78  
— 143.48  
— 127.47  
— 122.27

77.48  
77.16  
76.84

65.53  
61.35  
55.66

25.90  
23.63  
18.60

10.78

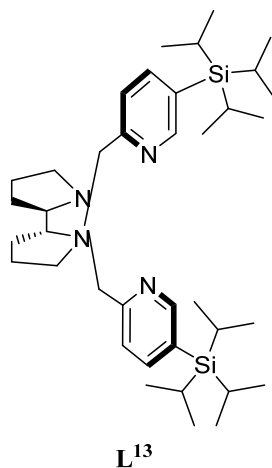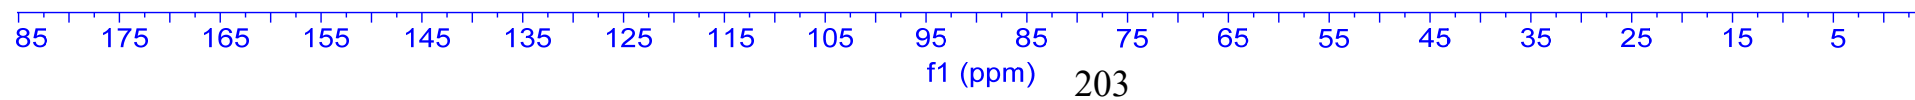

<sup>1</sup>H NMR, 400 MHz, CDCl<sub>3</sub>

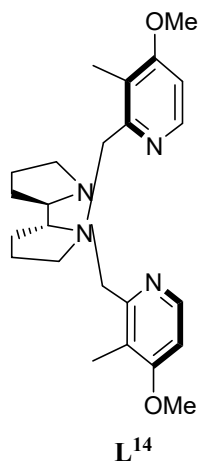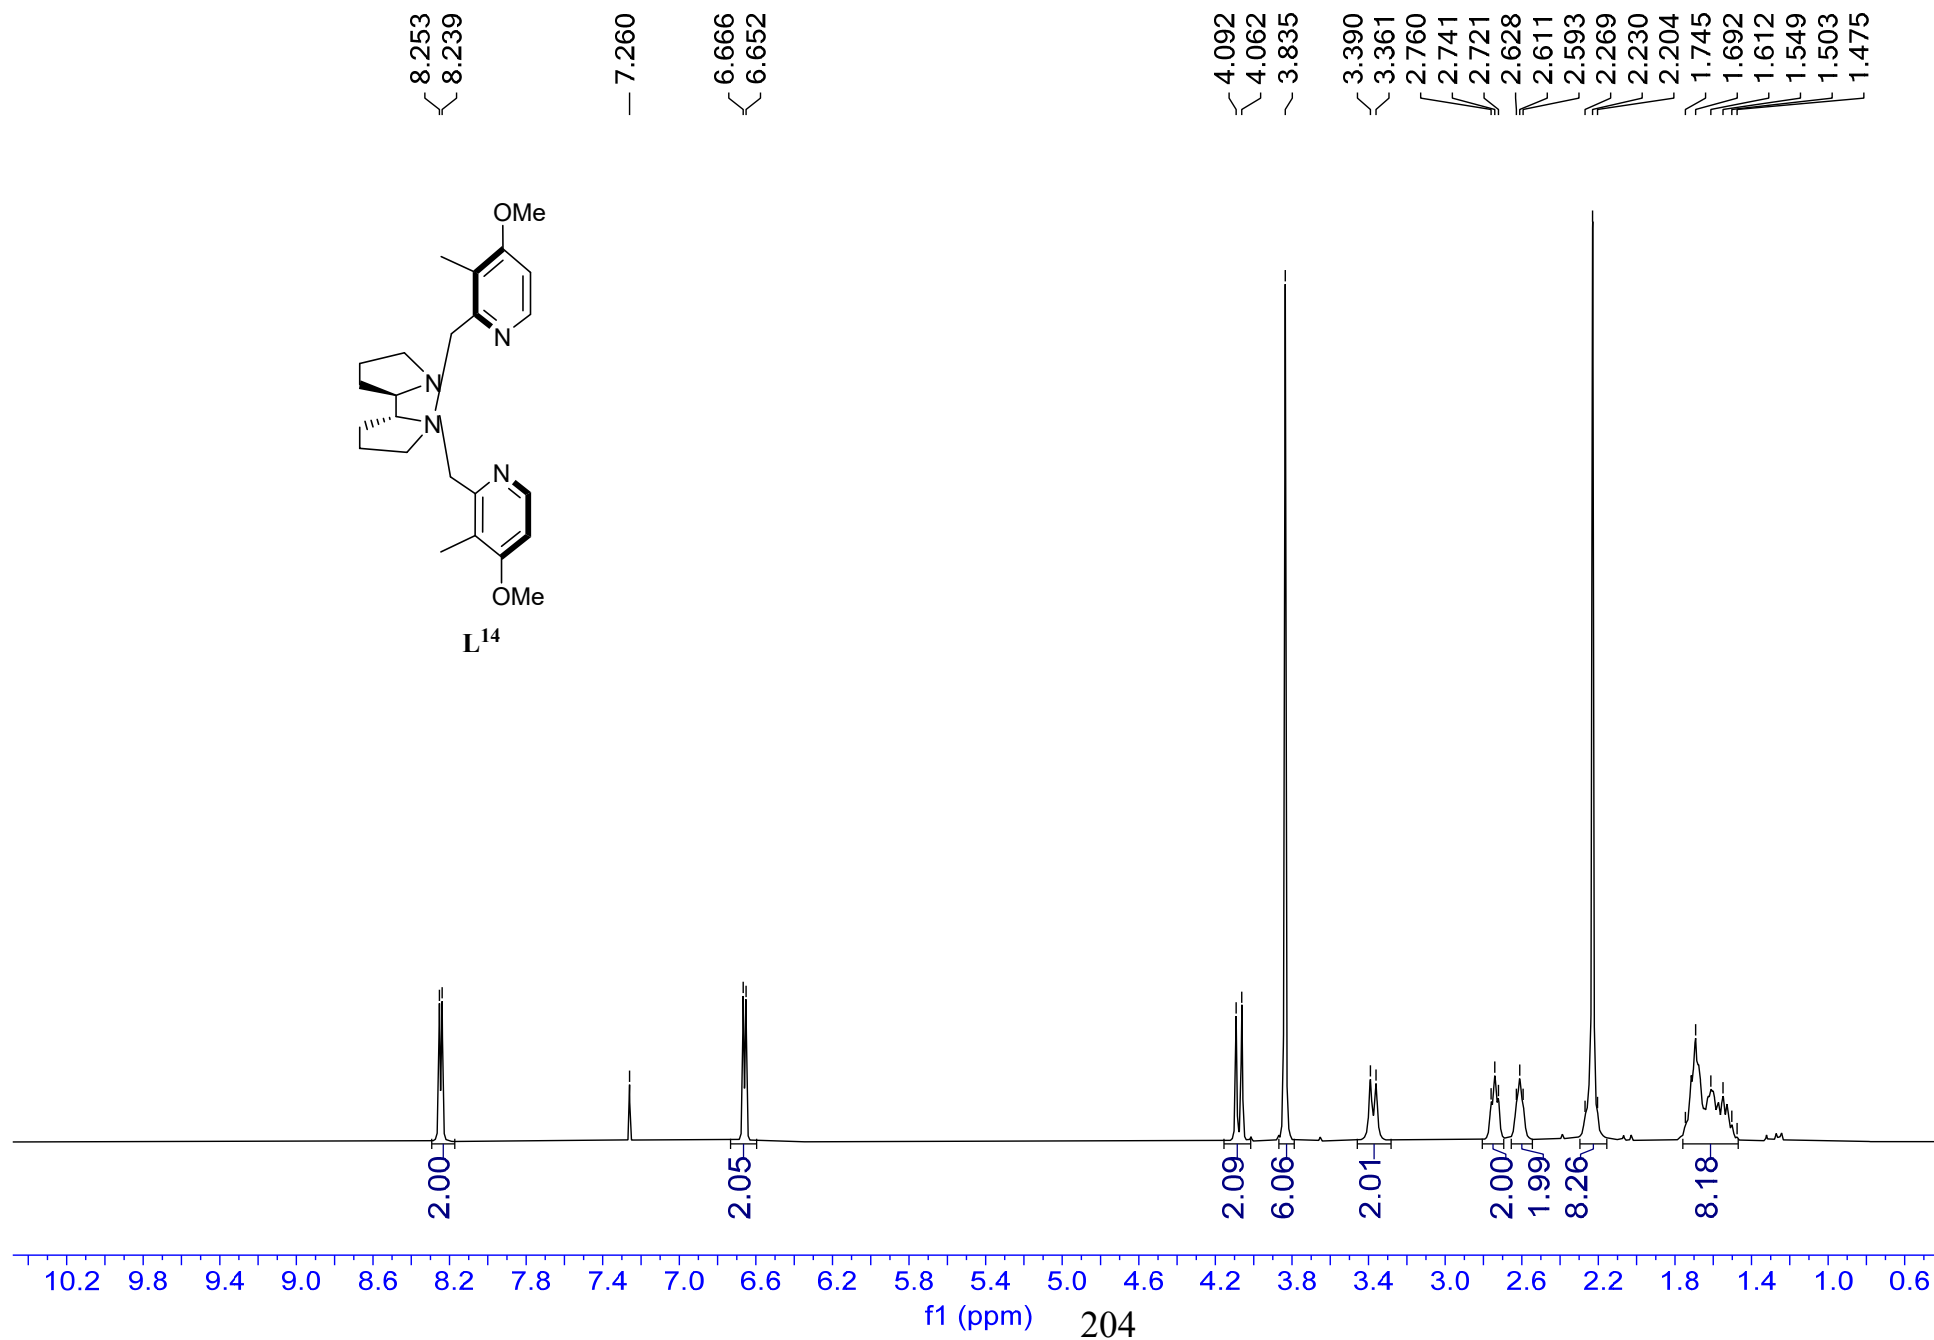



$^{13}\text{C}$  NMR 101 MHz,  $\text{CDCl}_3$

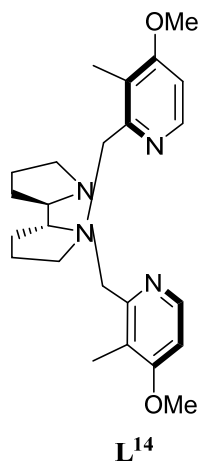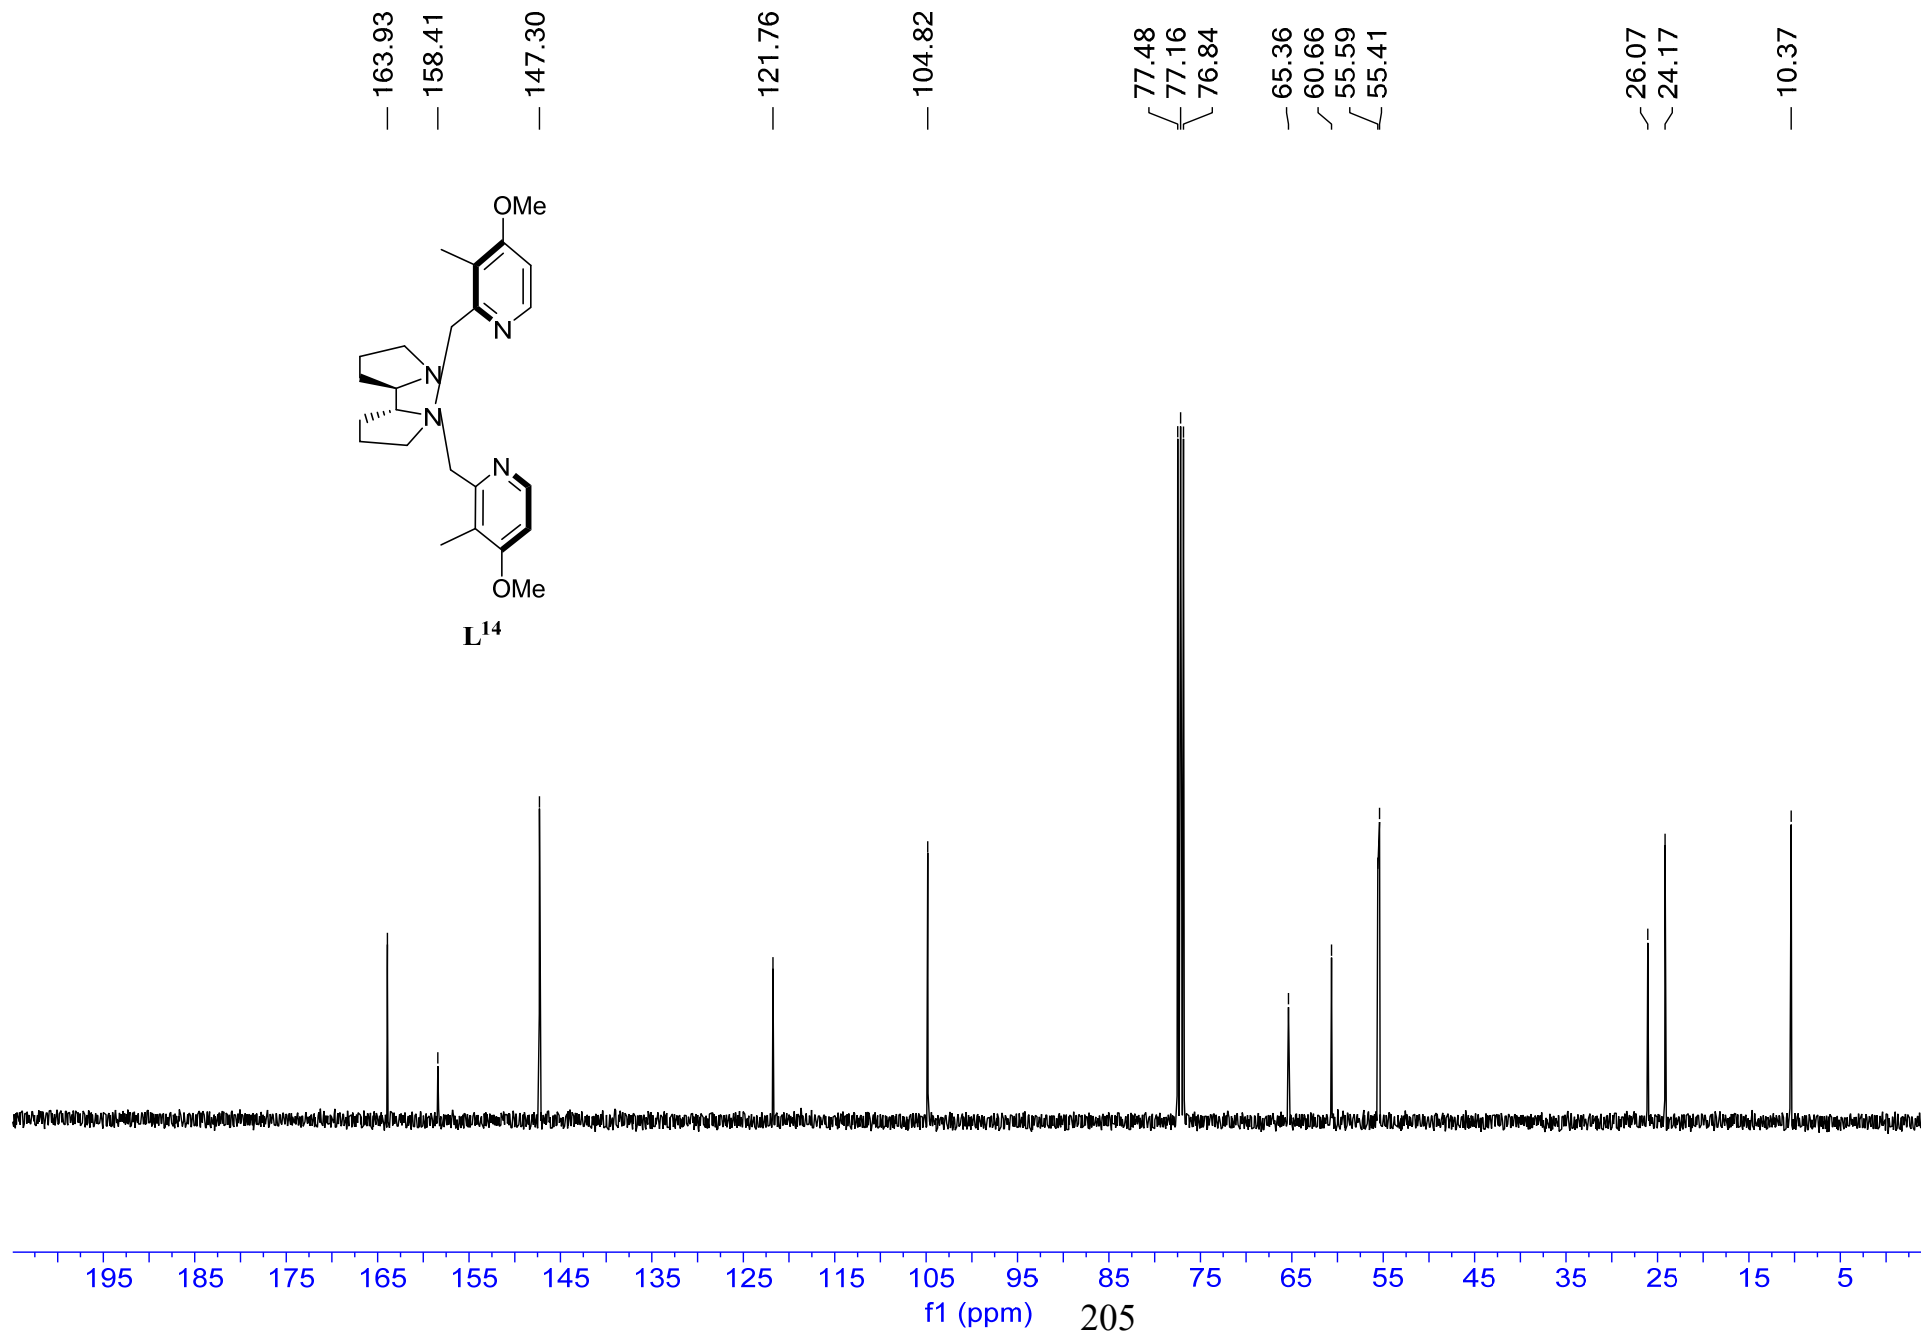

$^1\text{H}$  NMR, 400 MHz,  $\text{CDCl}_3$

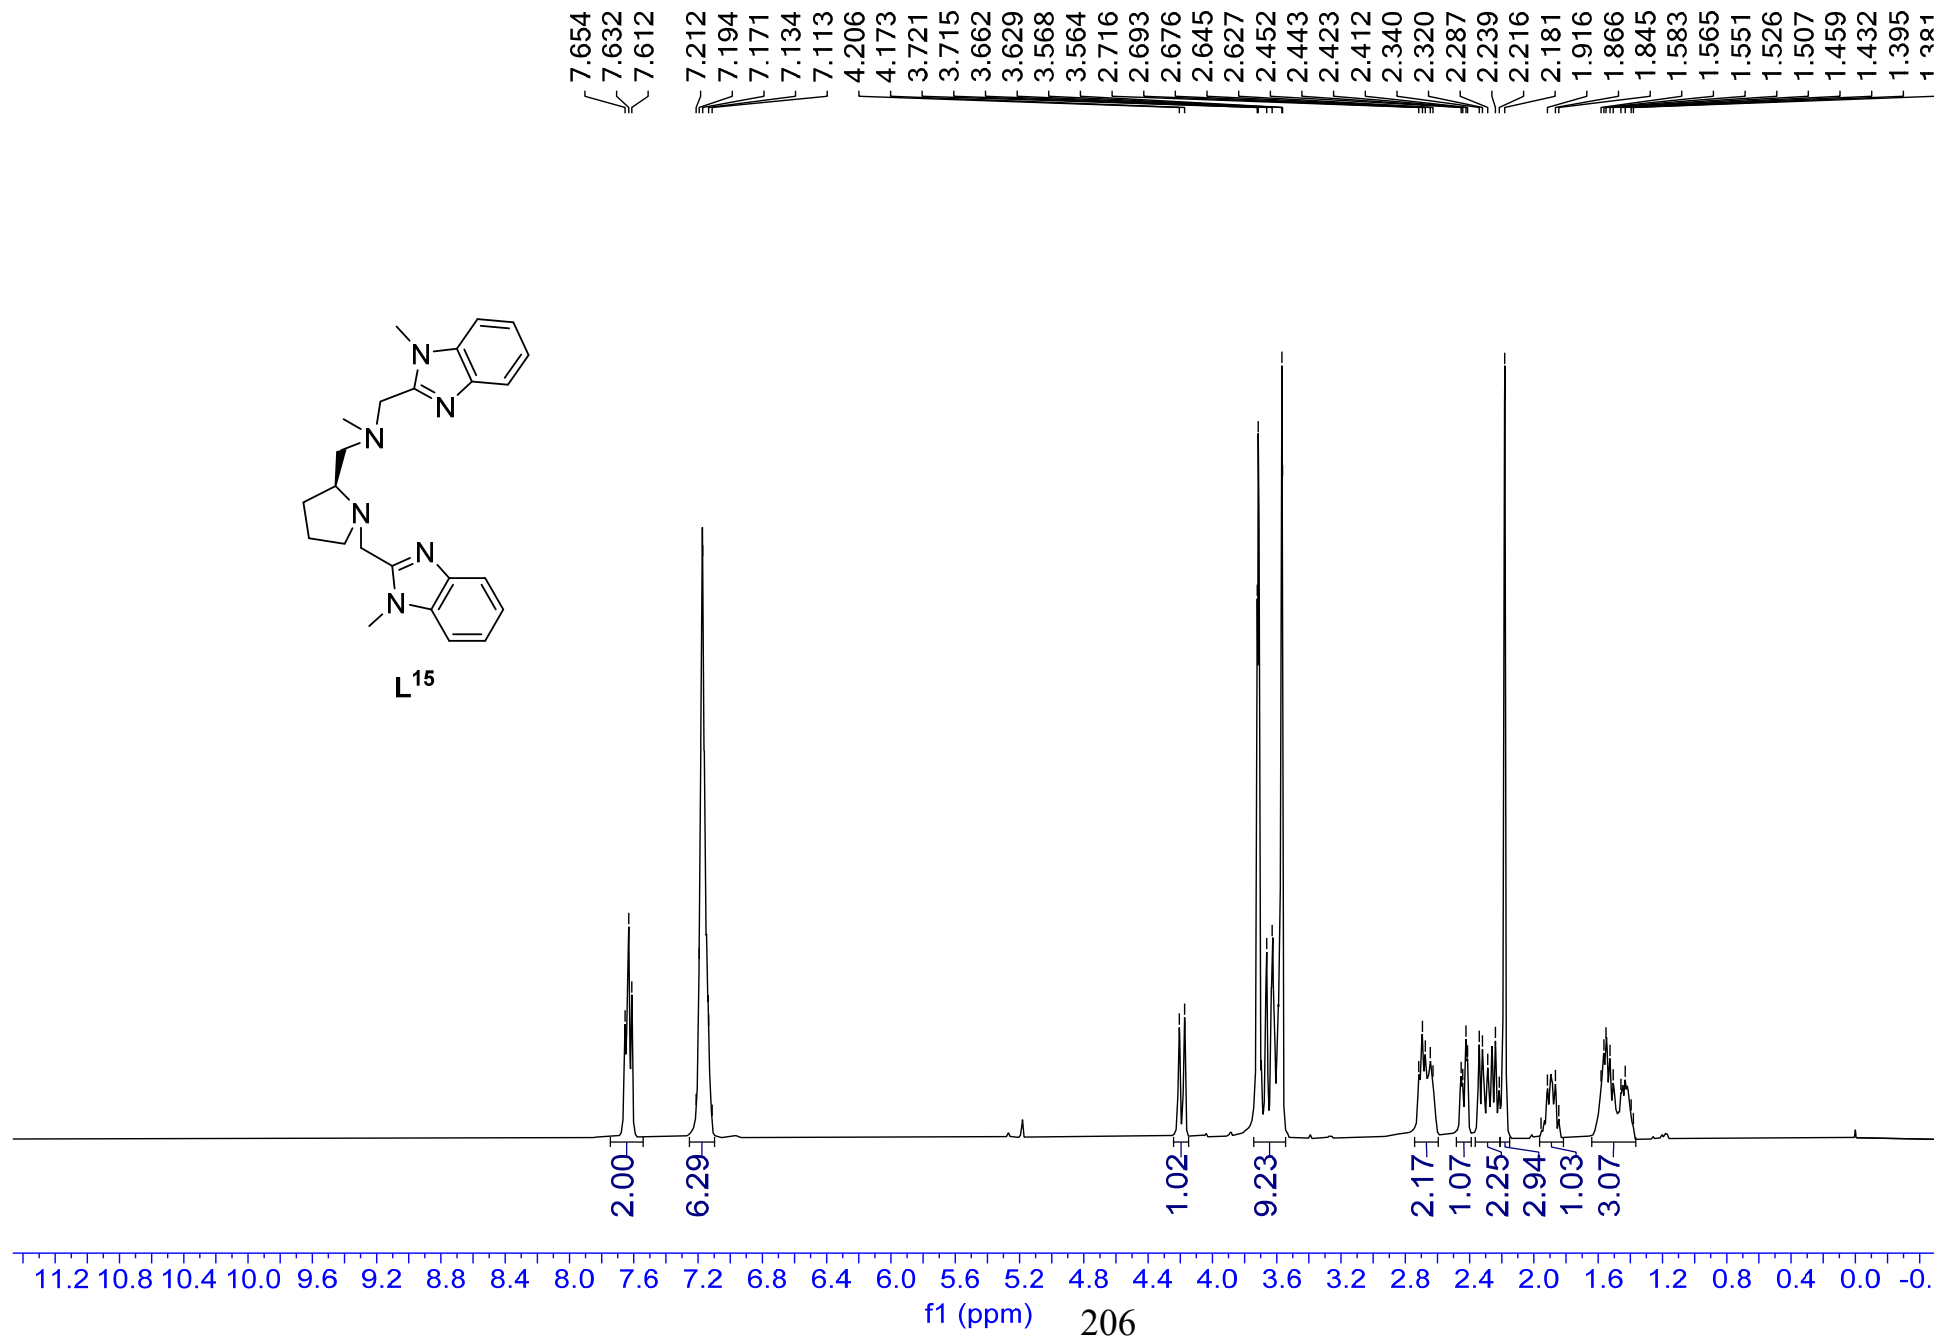

$^{13}\text{C}$  NMR 101 MHz,  $\text{CDCl}_3$

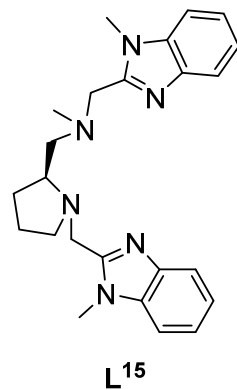

152.39  
151.81

142.25  
136.33  
136.24

122.62  
122.43  
121.95  
121.83  
119.65  
119.55  
109.15  
109.11

77.48  
77.16  
76.84

62.72  
62.13  
56.12  
54.99  
52.47

43.32

30.44  
30.12  
29.94  
22.65

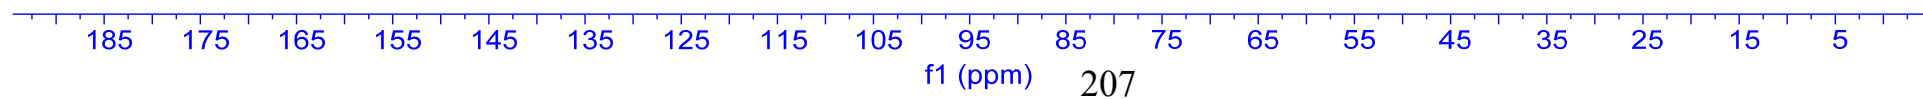

$^1\text{H}$  NMR, 400 MHz,  $\text{CDCl}_3$

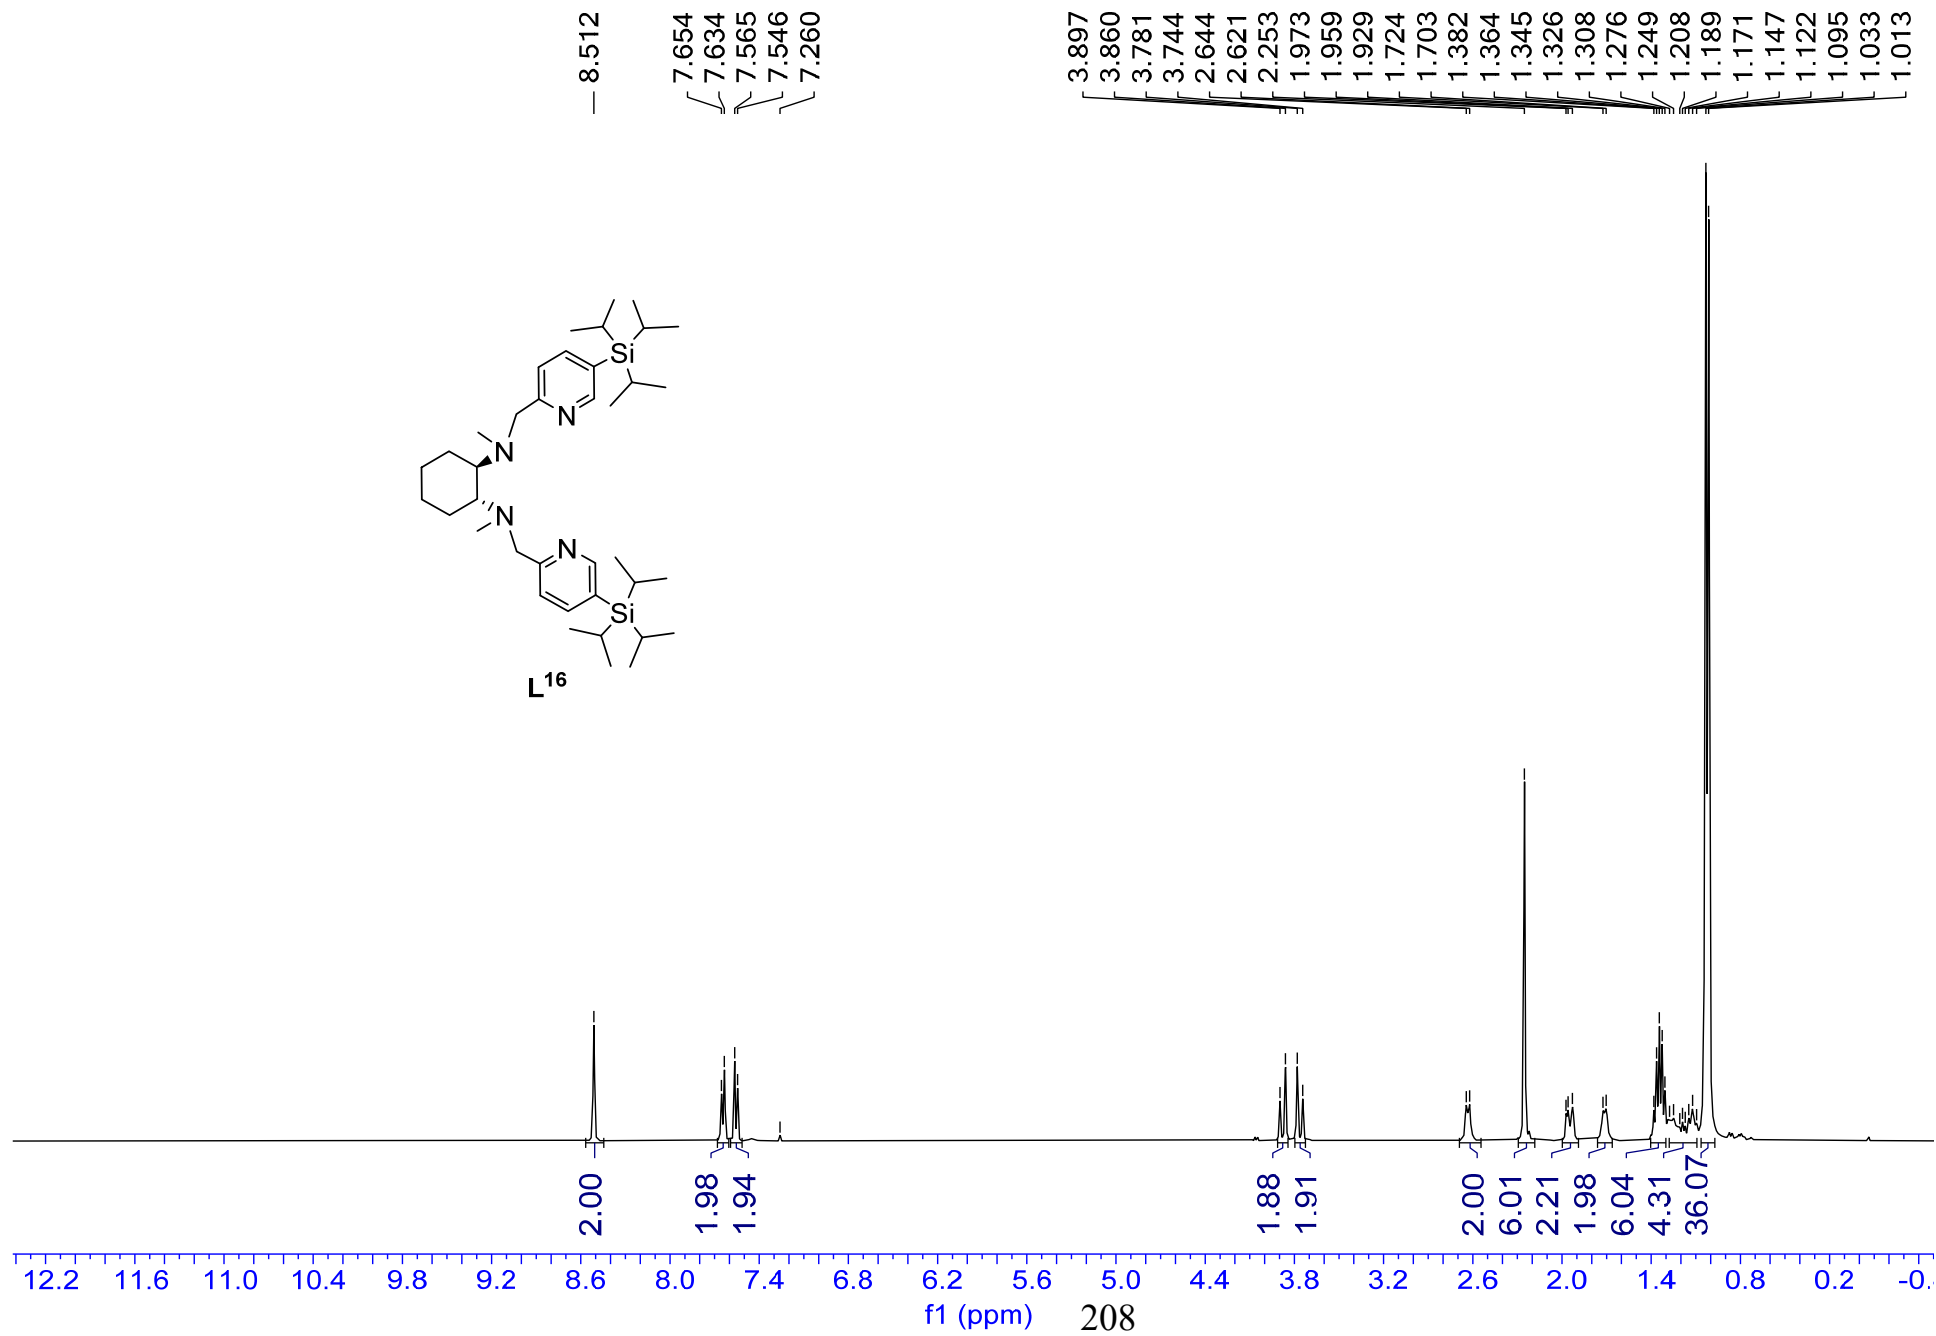

$^{13}\text{C}$  NMR 101 MHz,  $\text{CDCl}_3$

— 161.50

— 154.44

— 143.25

— 127.06

— 122.23

77.48  
77.16  
76.84

— 64.77

— 60.63

— 36.84

26.07  
25.90

— 18.50

— 10.71

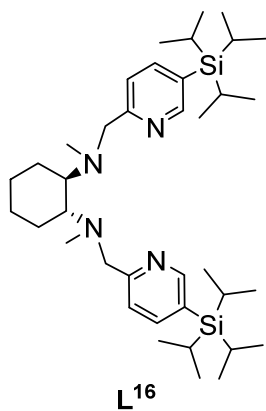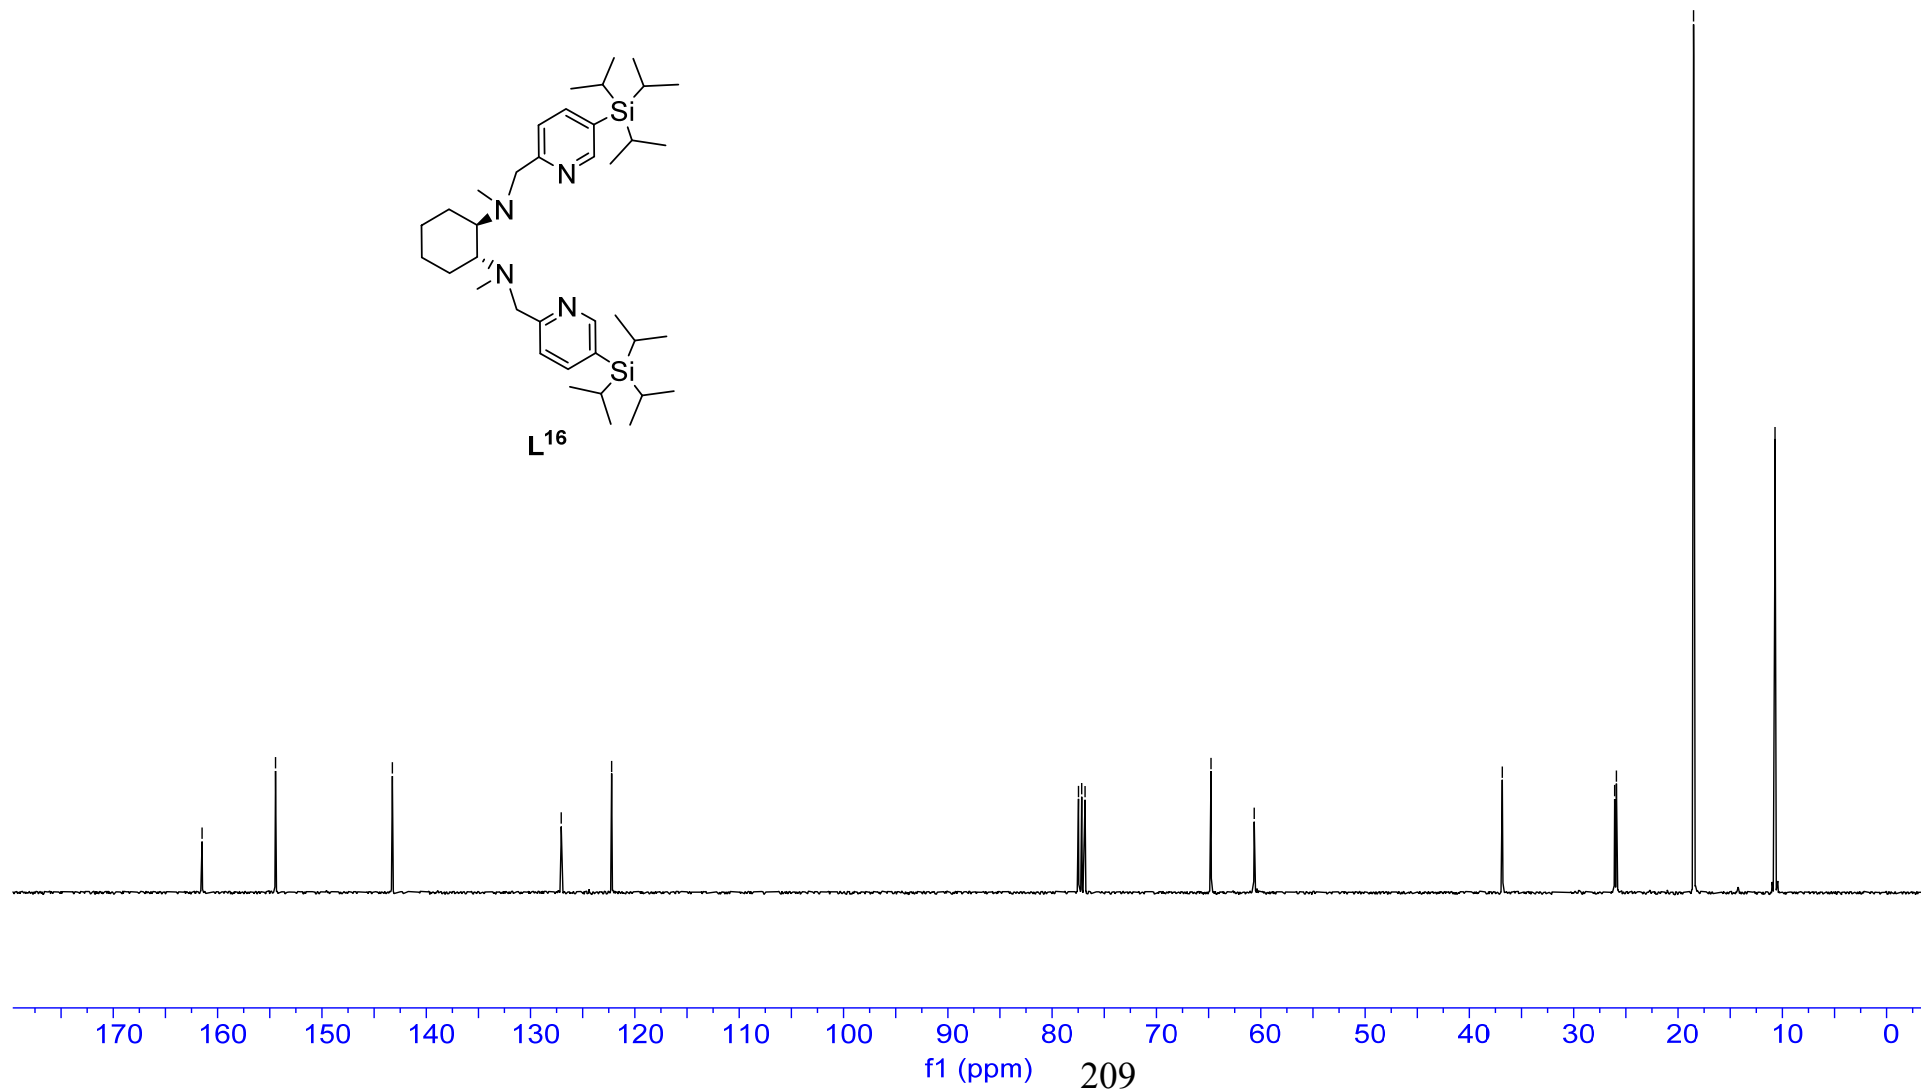

<sup>1</sup>H NMR, 400 MHz, CDCl<sub>3</sub>

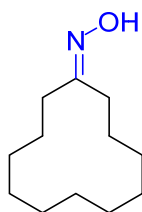

**1a**

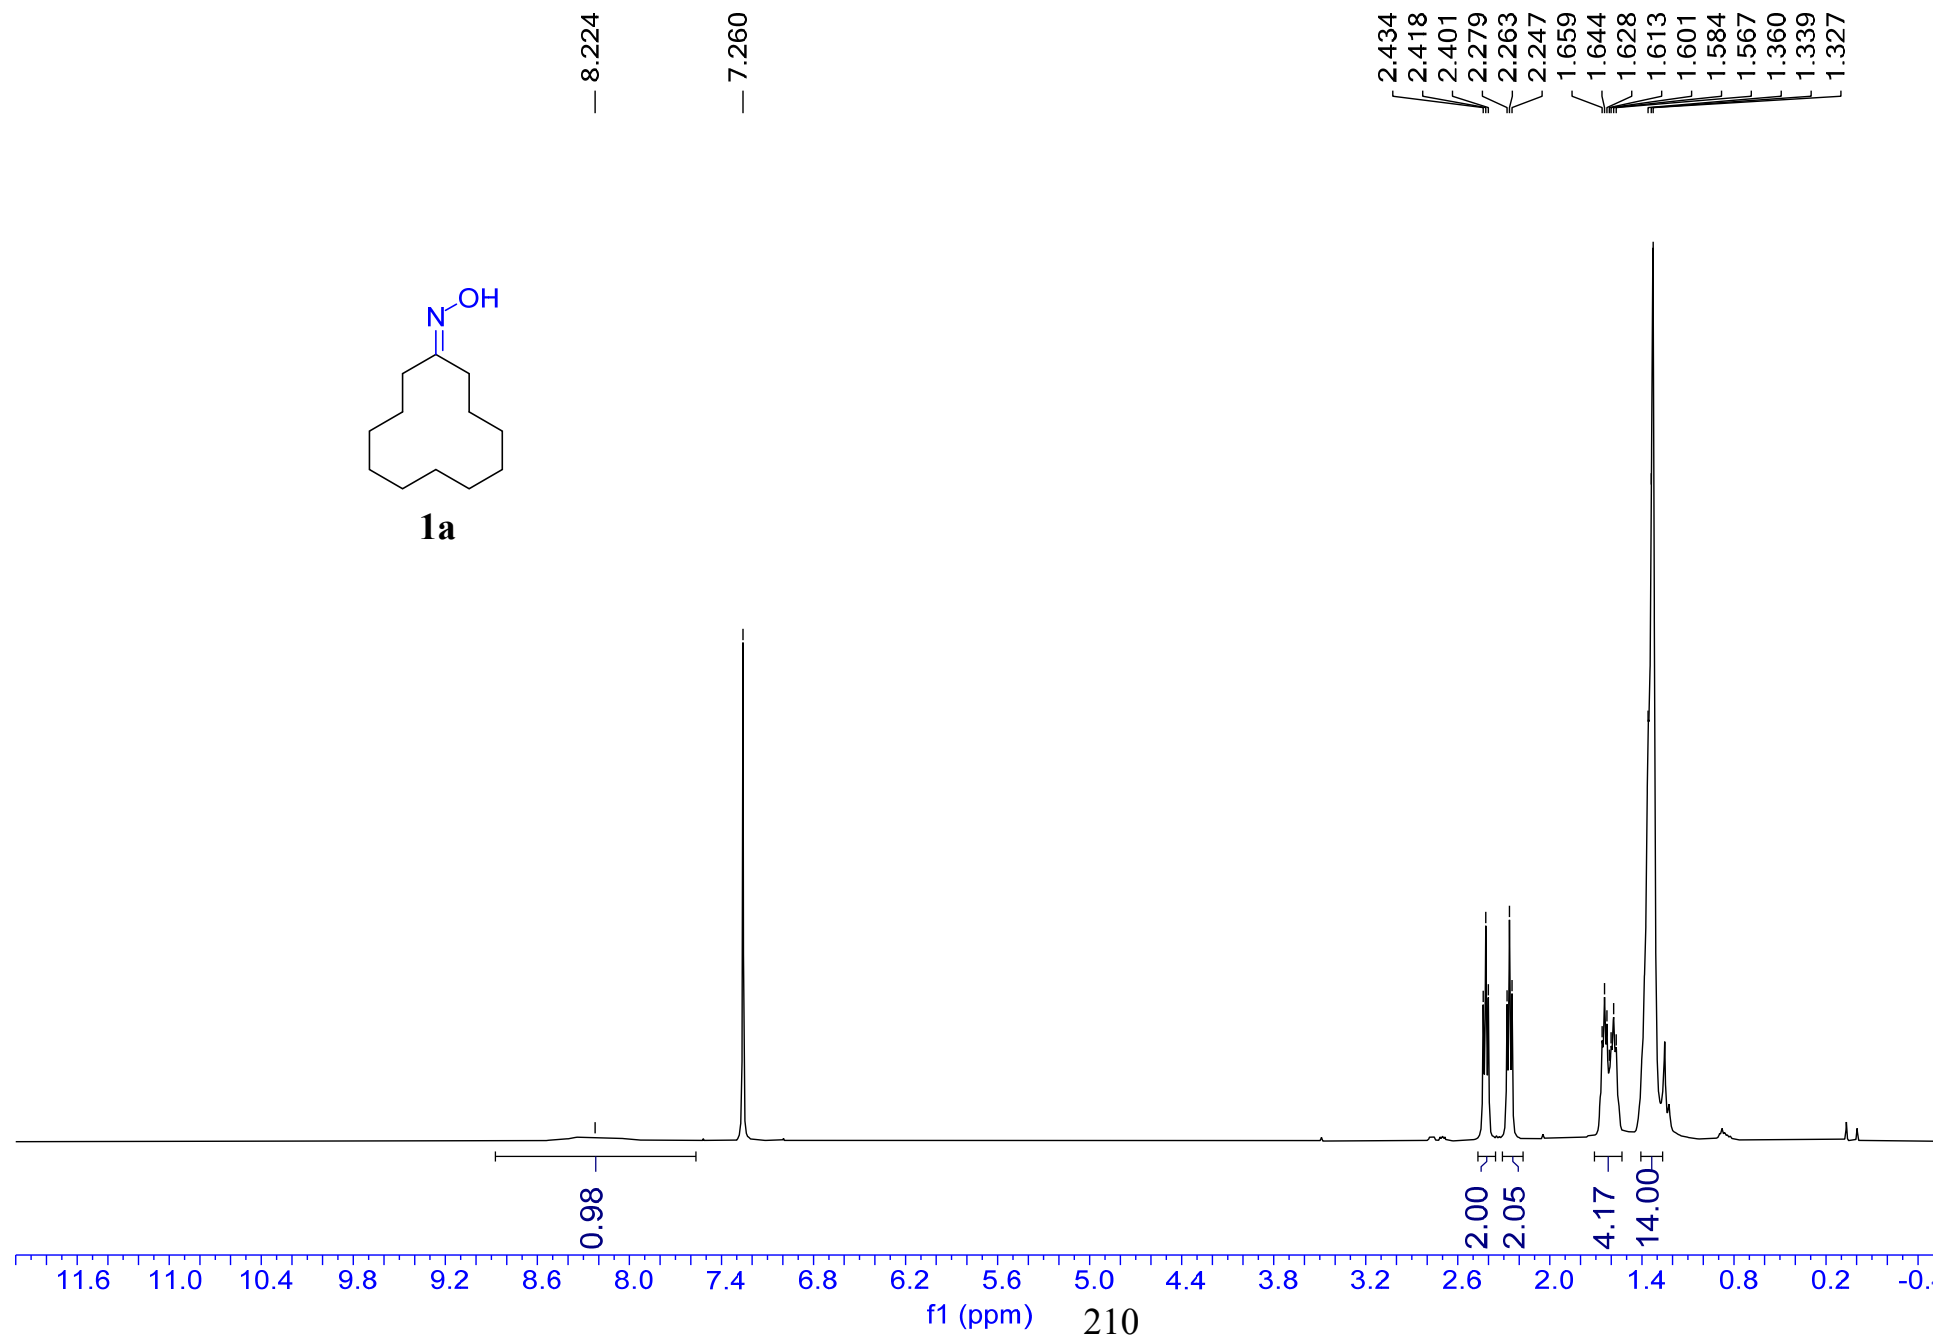

$^{13}\text{C}$  NMR 101 MHz,  $\text{CDCl}_3$

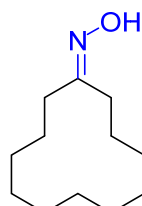

**1a**

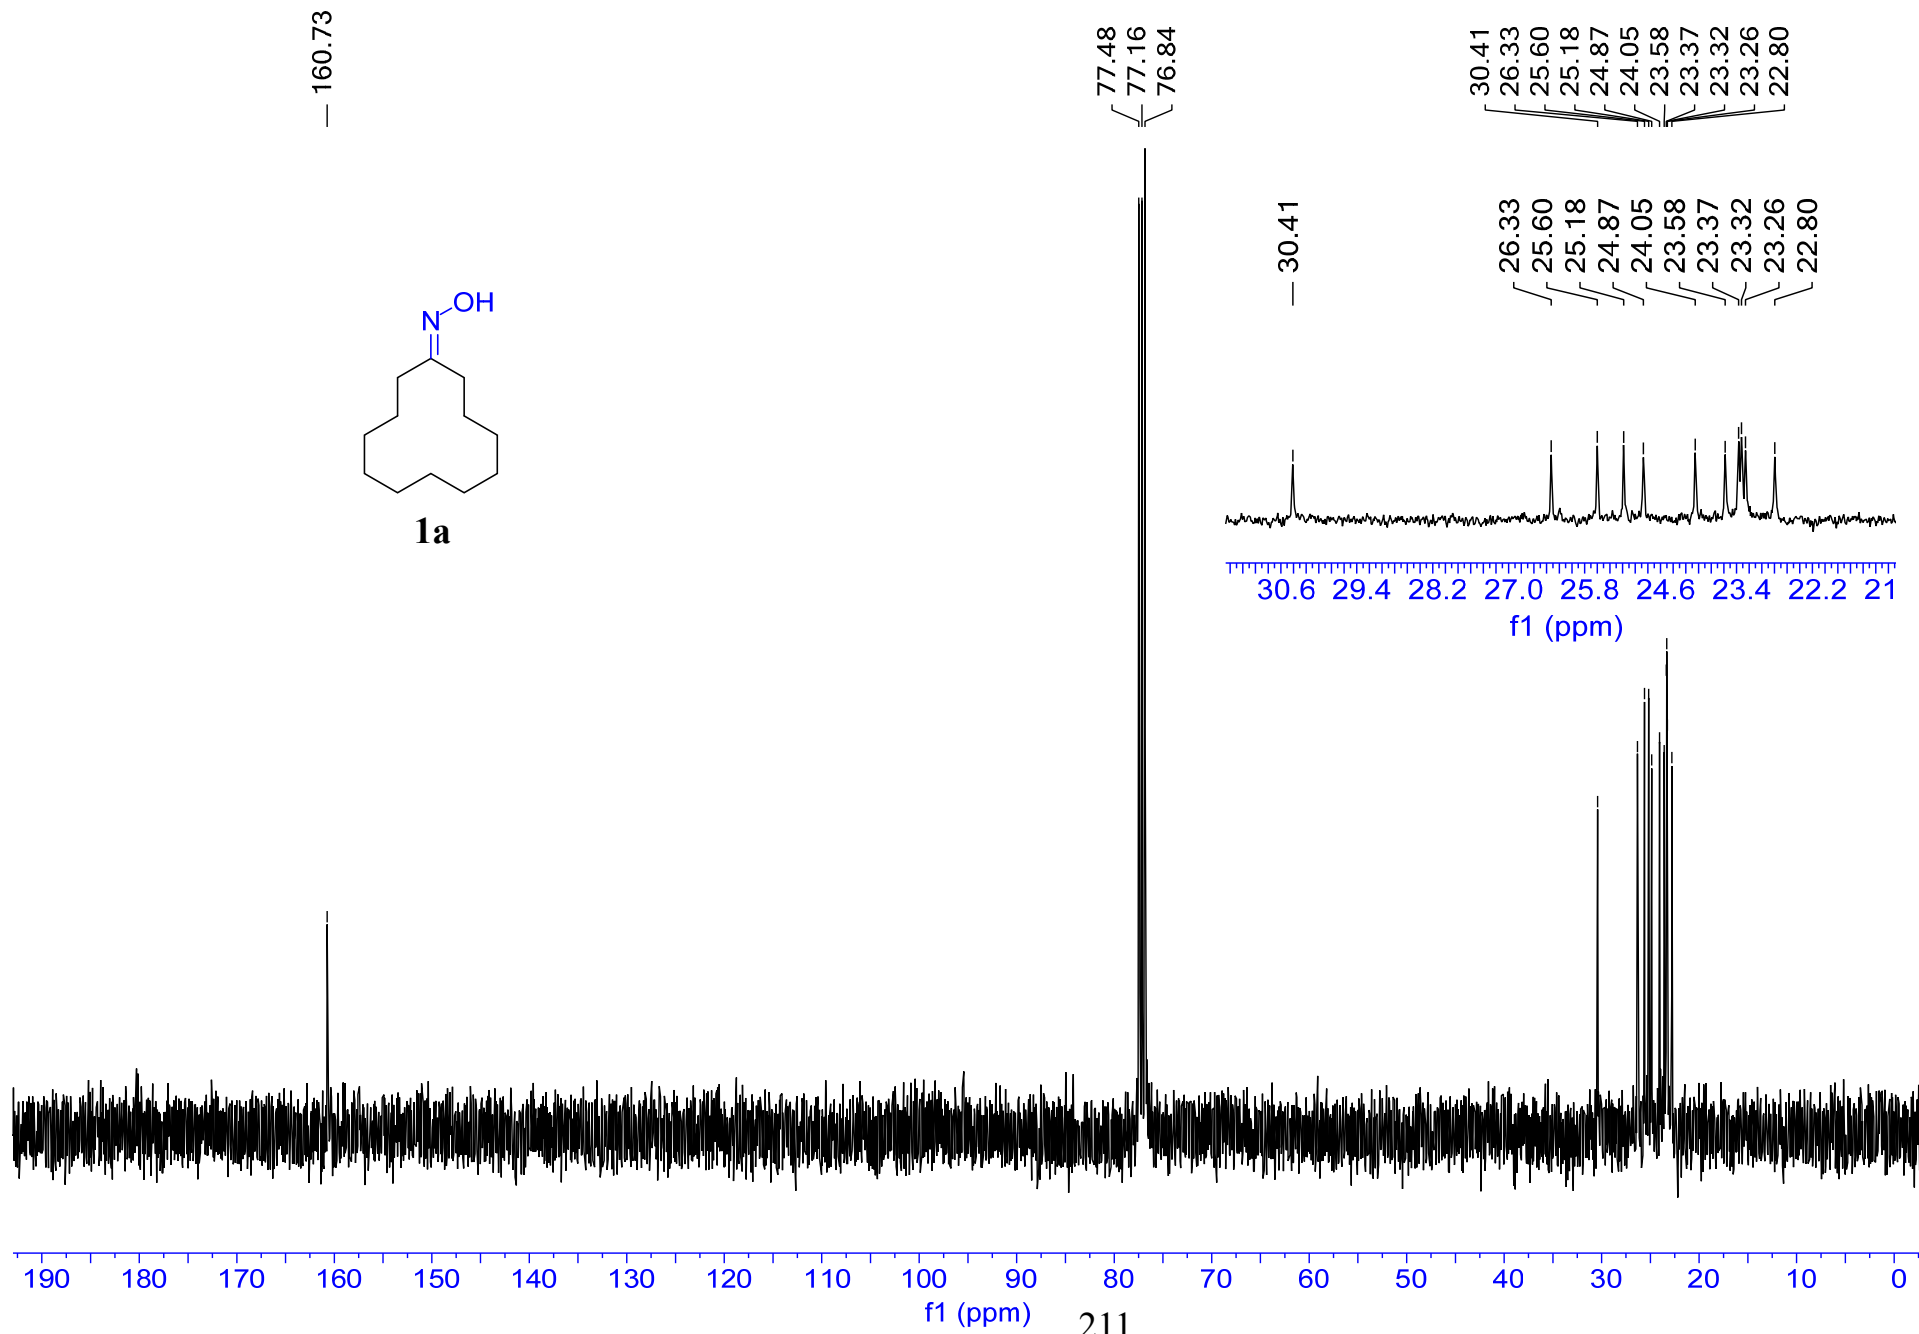

<sup>1</sup>H NMR, 400 MHz, CDCl<sub>3</sub>

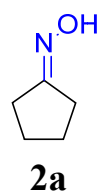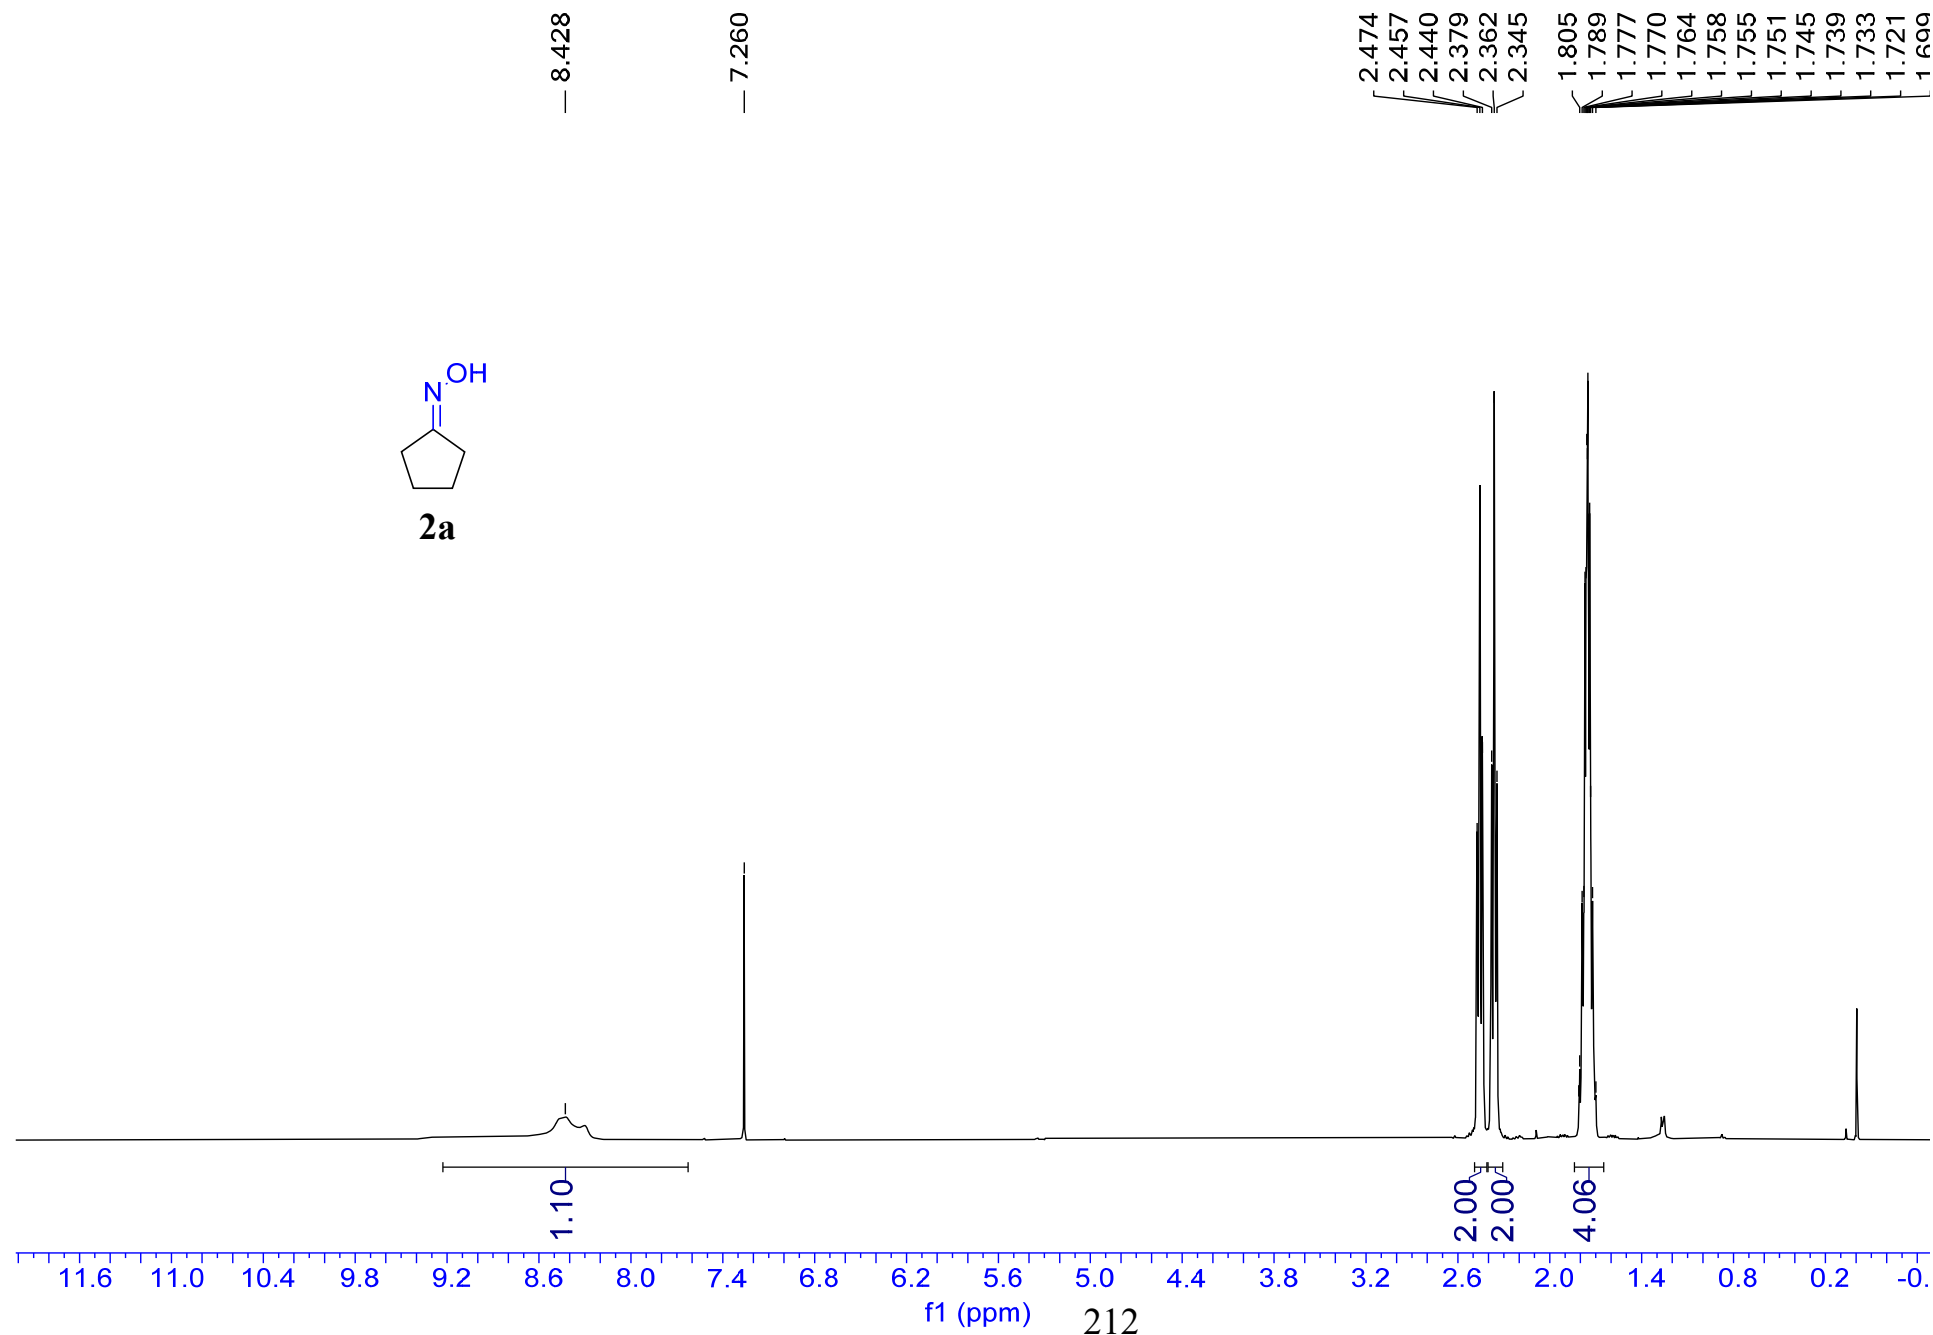



$^{13}\text{C}$  NMR 101 MHz,  $\text{CDCl}_3$

— 167.57

77.48  
77.16  
76.84

31.00  
27.25  
25.32  
24.70

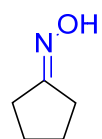

**2a**

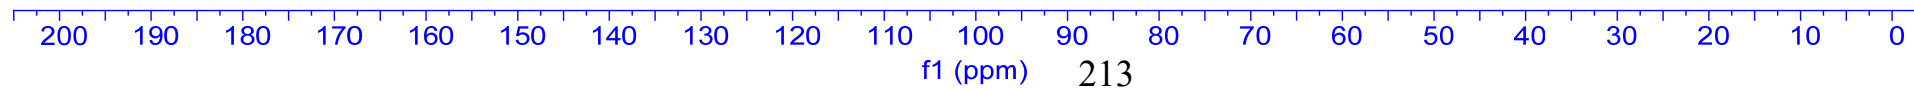

<sup>1</sup>H NMR, 400 MHz, CDCl<sub>3</sub>

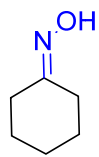

**3a**

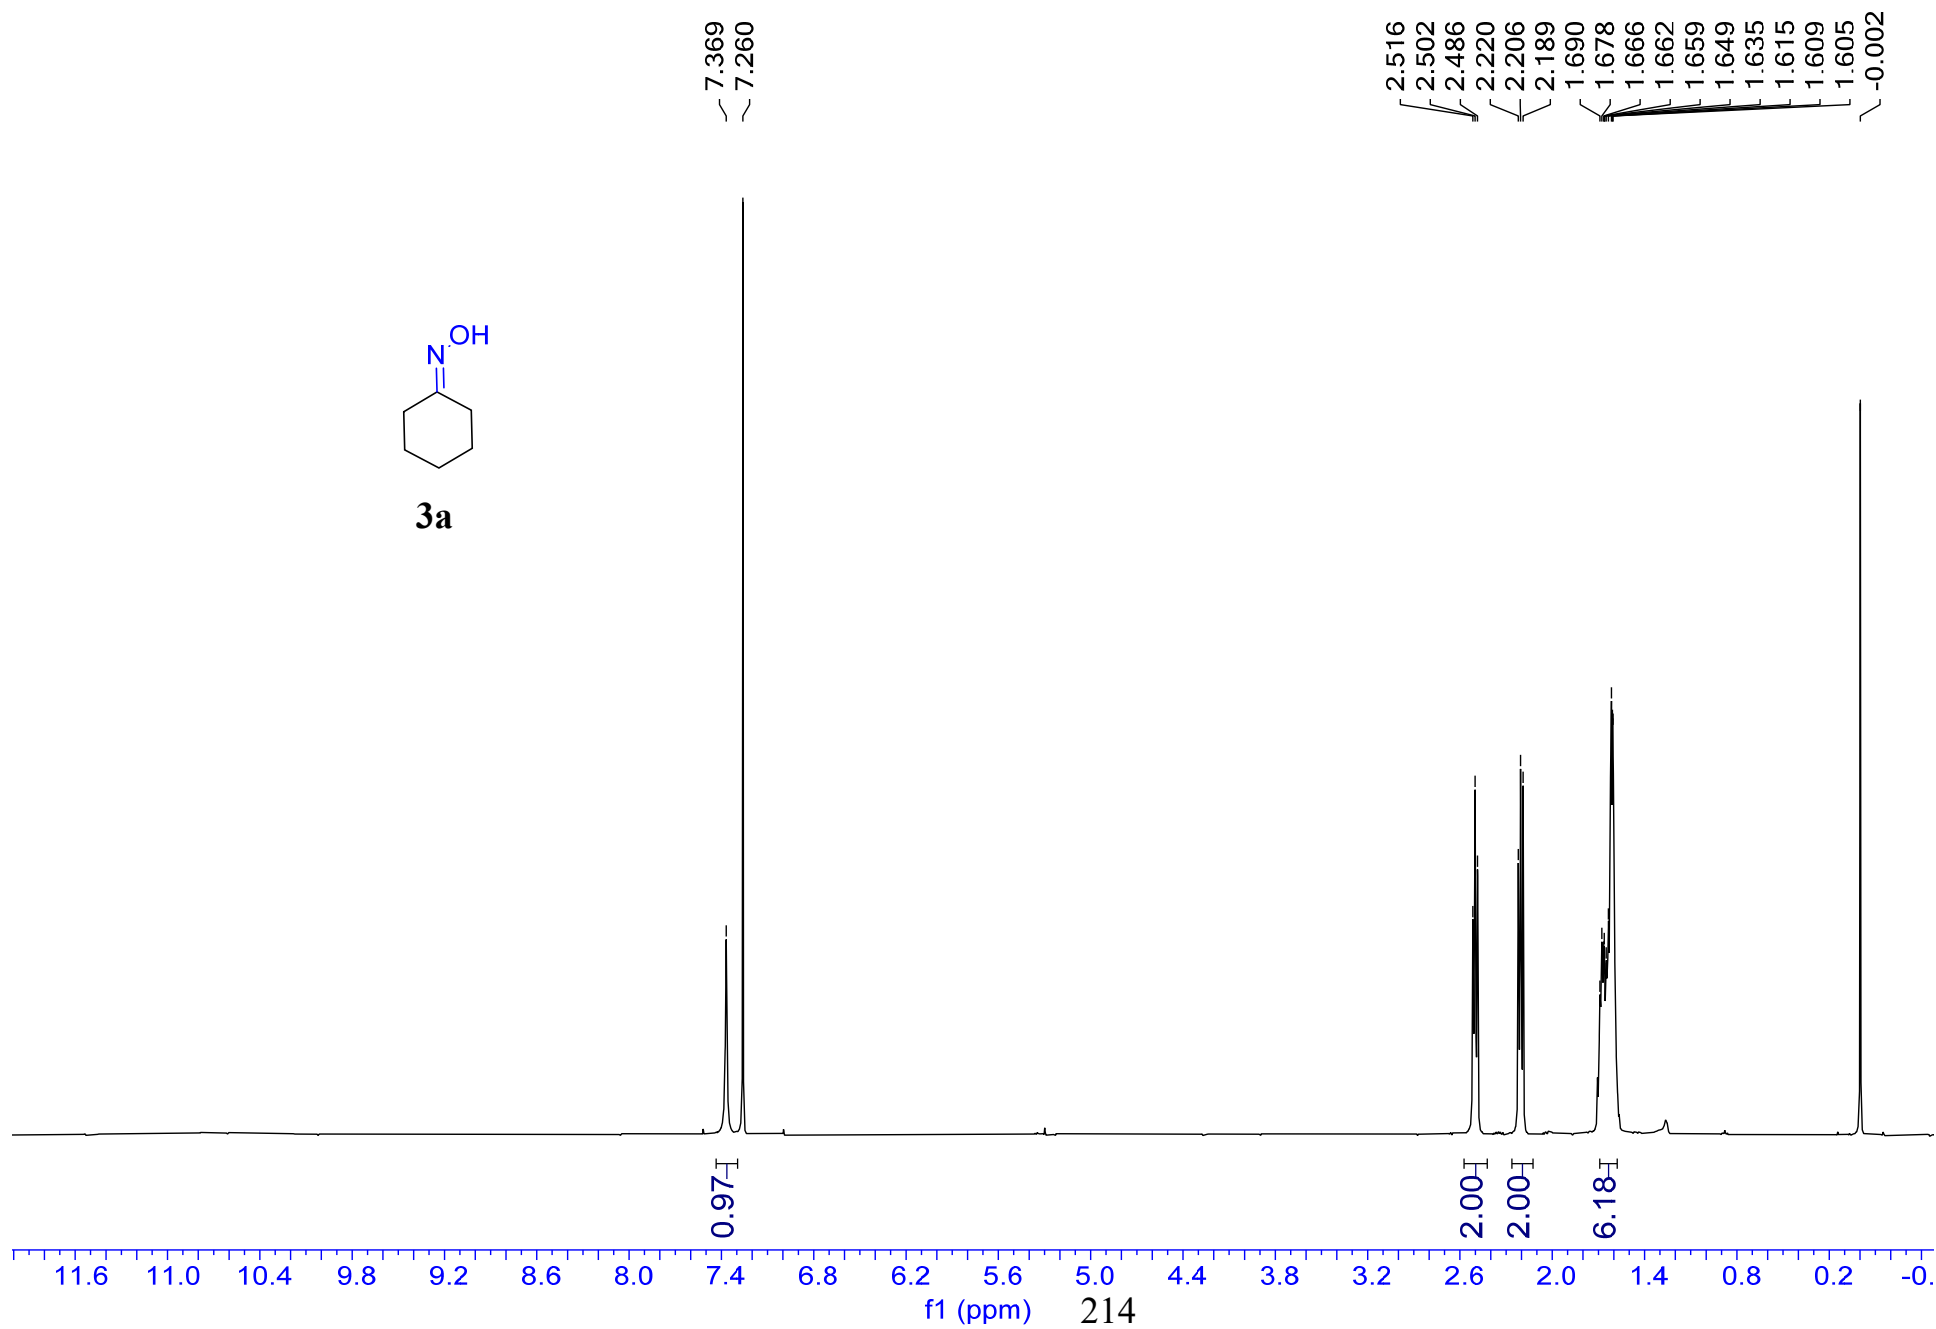

$^{13}\text{C}$  NMR 101 MHz,  $\text{CDCl}_3$

— 160.87

77.48  
77.16  
76.84

32.29  
27.01  
25.93  
25.72  
24.60

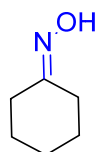

**3a**

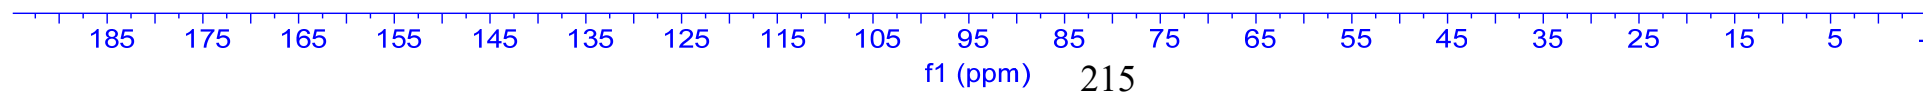

215

<sup>1</sup>H NMR, 400 MHz, CDCl<sub>3</sub>

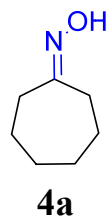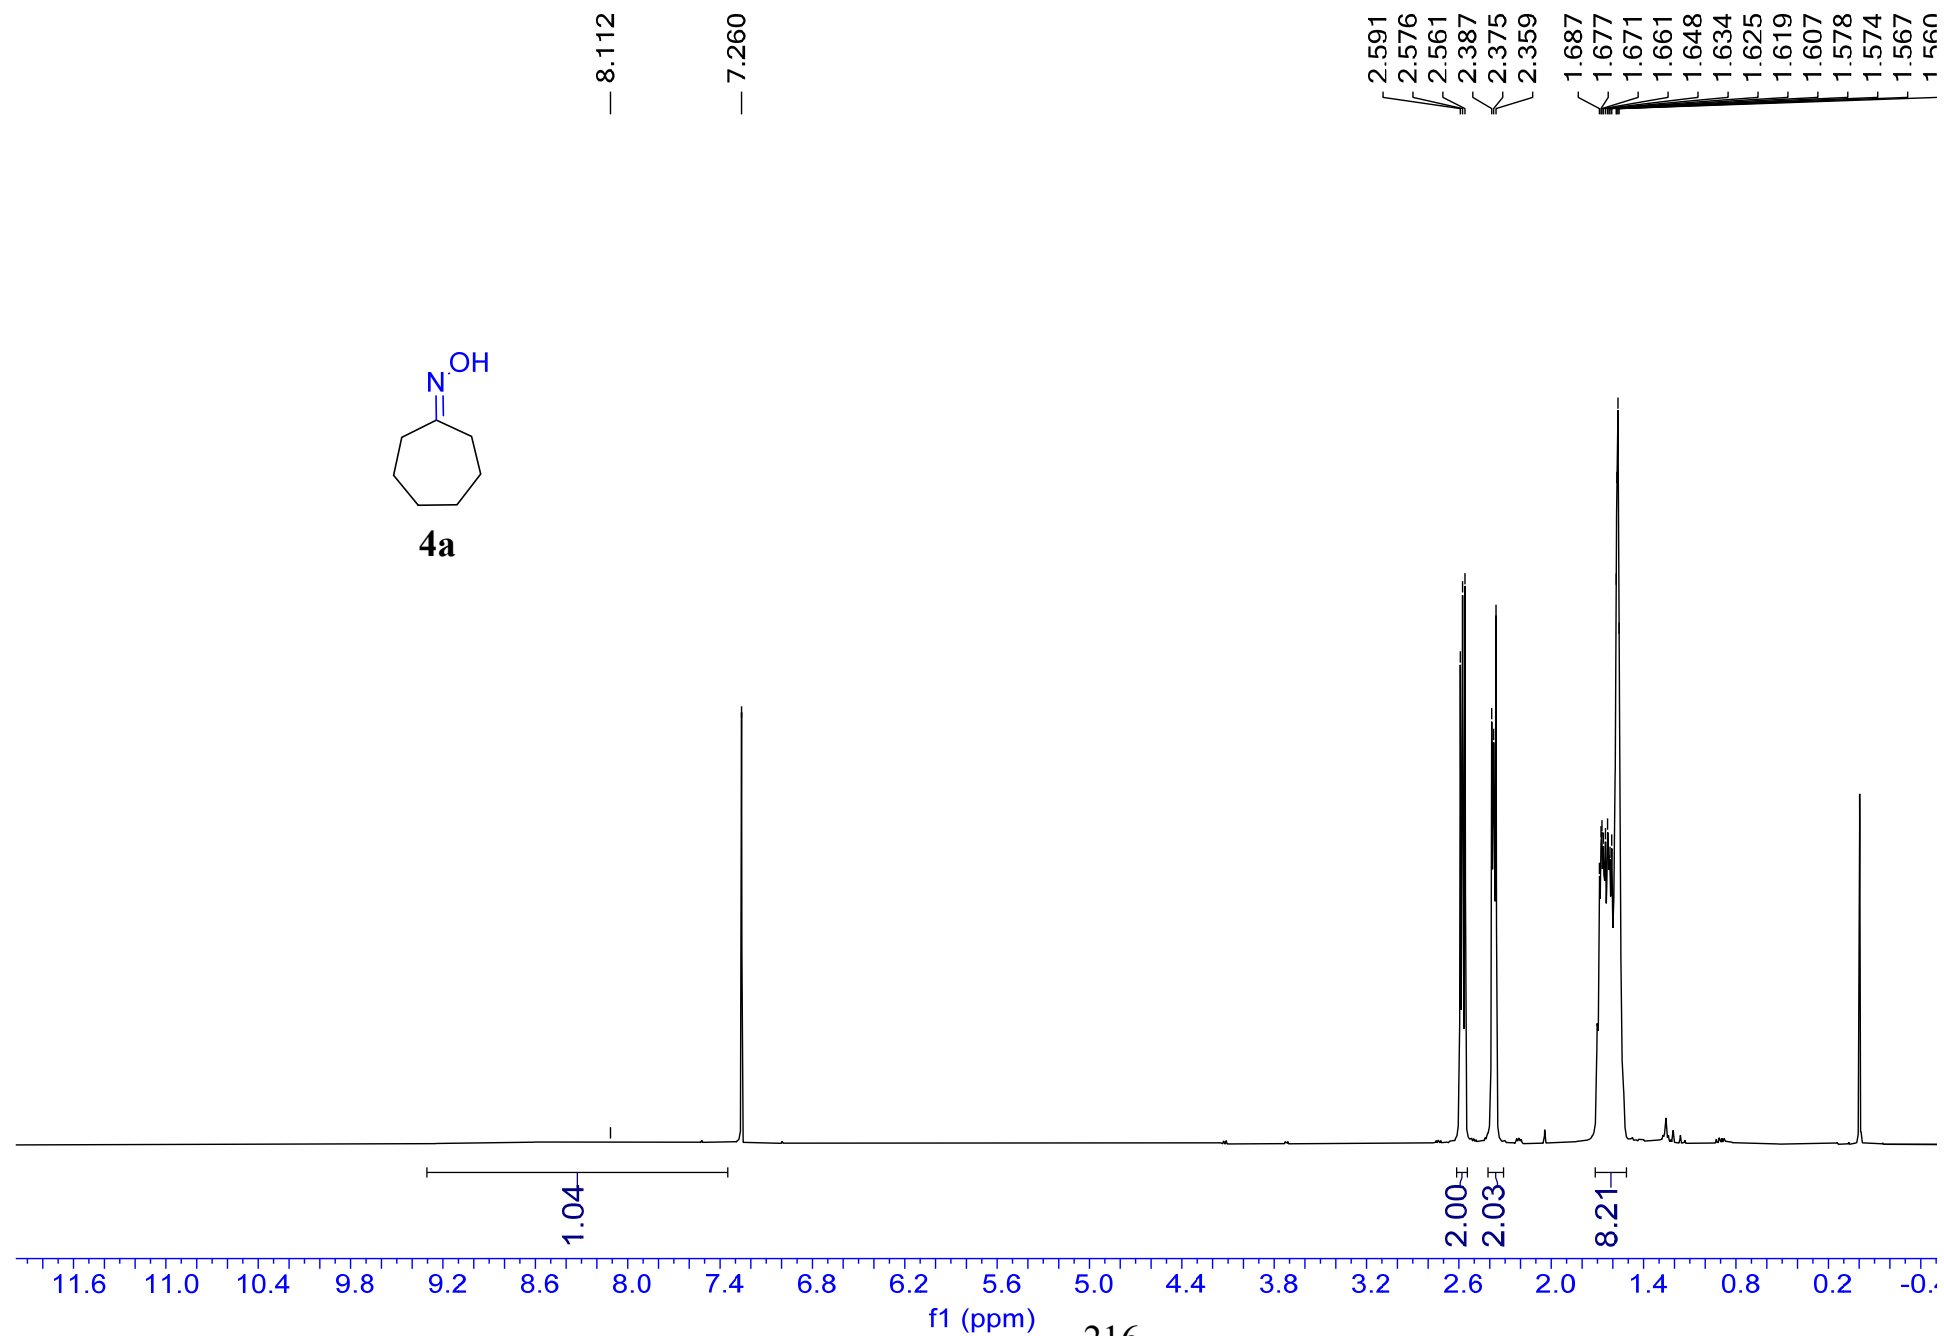

$^{13}\text{C}$  NMR 101 MHz,  $\text{CDCl}_3$

— 164.38

77.48  
77.16  
76.84

33.76  
30.53  
30.40  
28.63  
27.60  
24.59

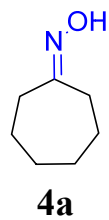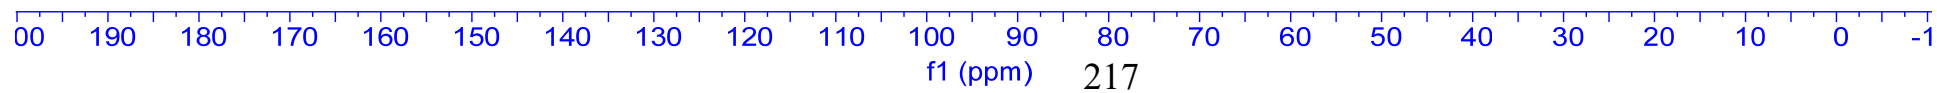

<sup>1</sup>H NMR, 400 MHz, CDCl<sub>3</sub>

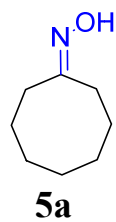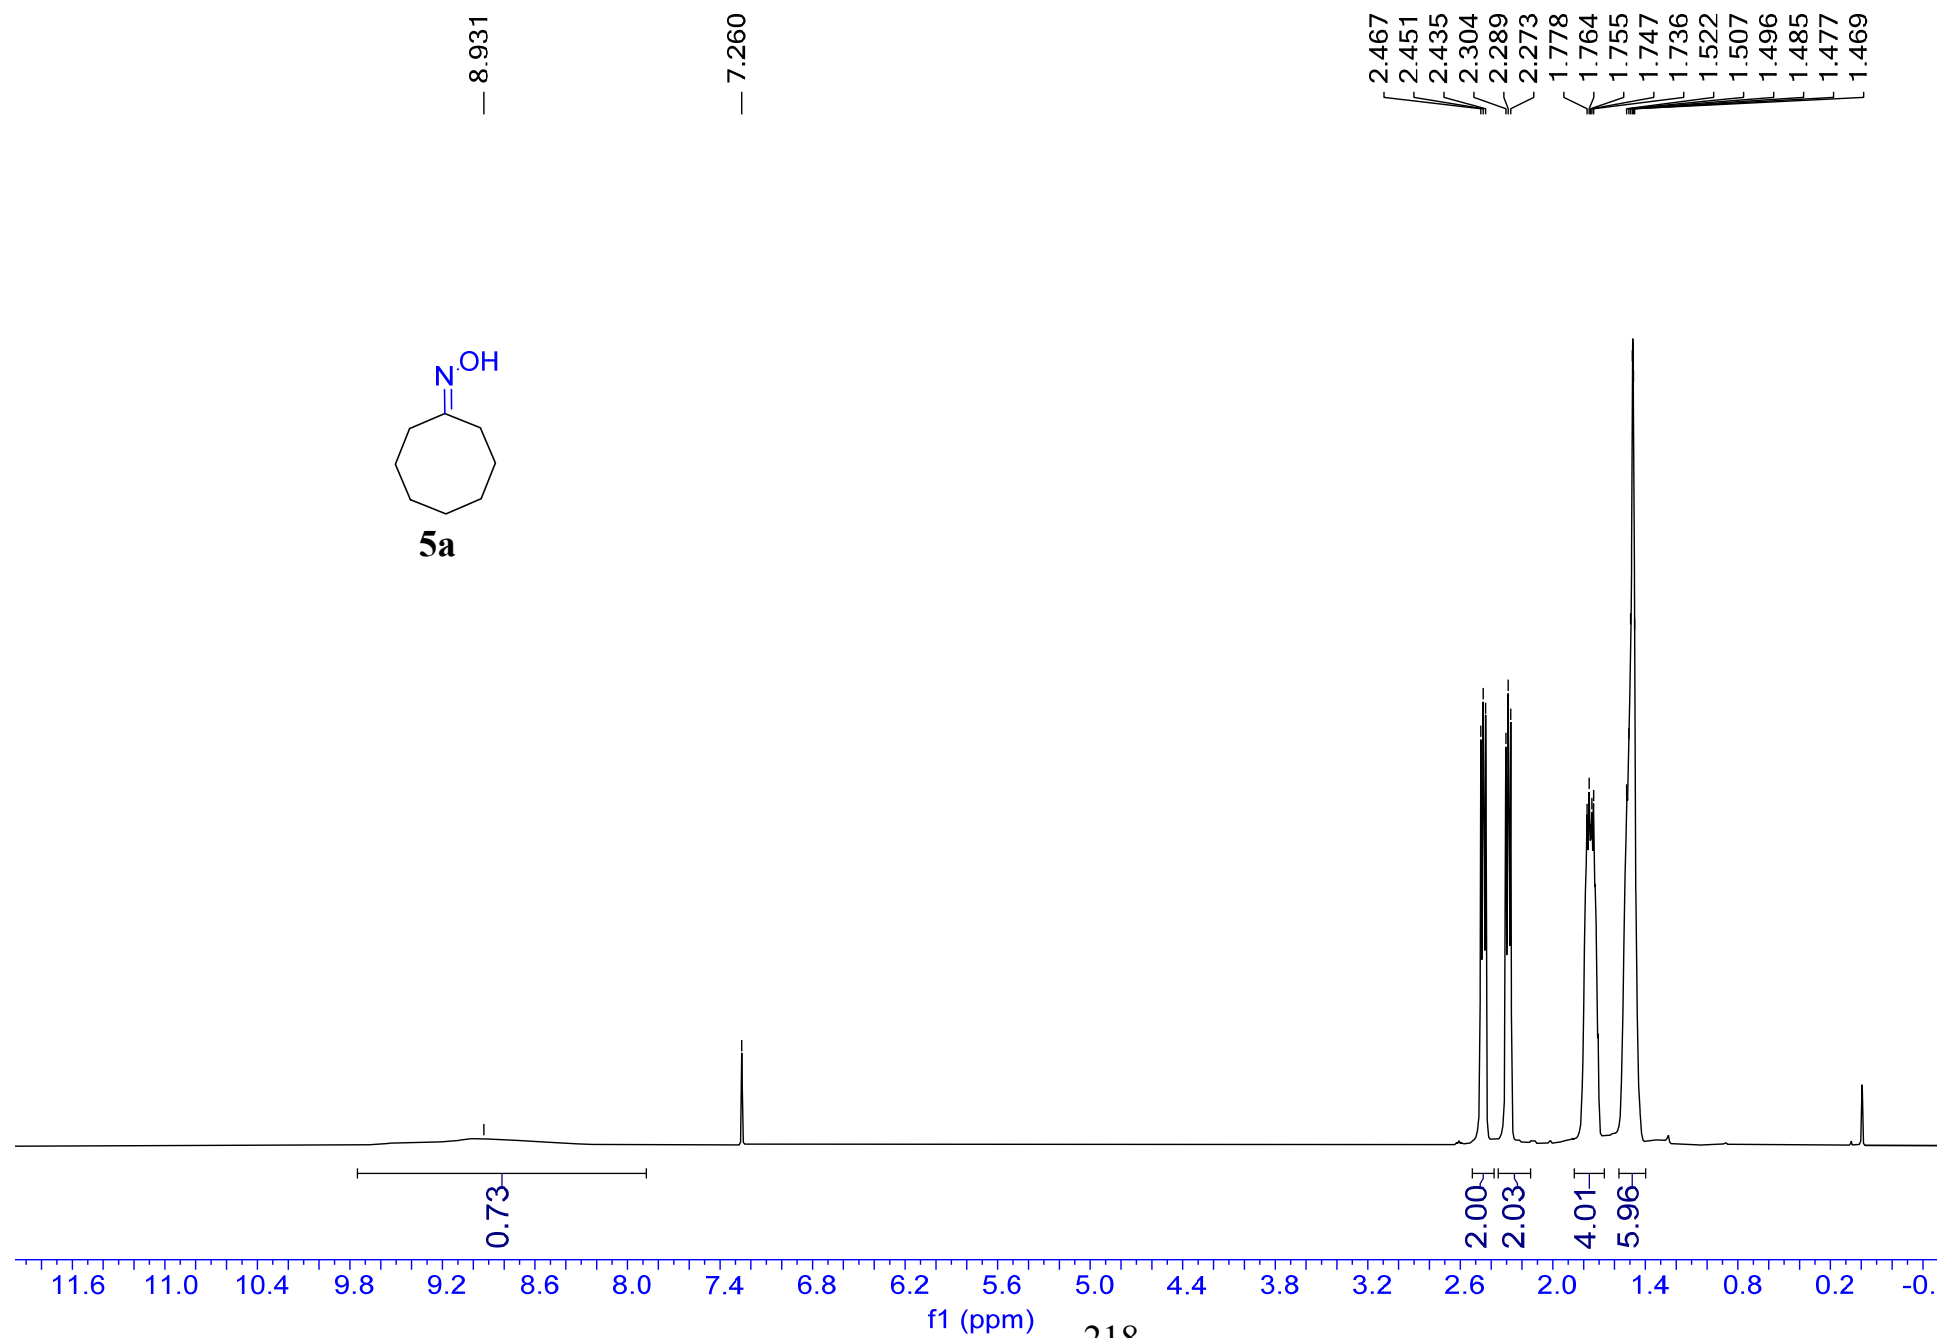

$^{13}\text{C}$  NMR 101 MHz,  $\text{CDCl}_3$

— 164.26

77.48  
77.16  
76.84

33.32  
27.38  
26.93  
26.74  
25.55  
24.81  
24.57

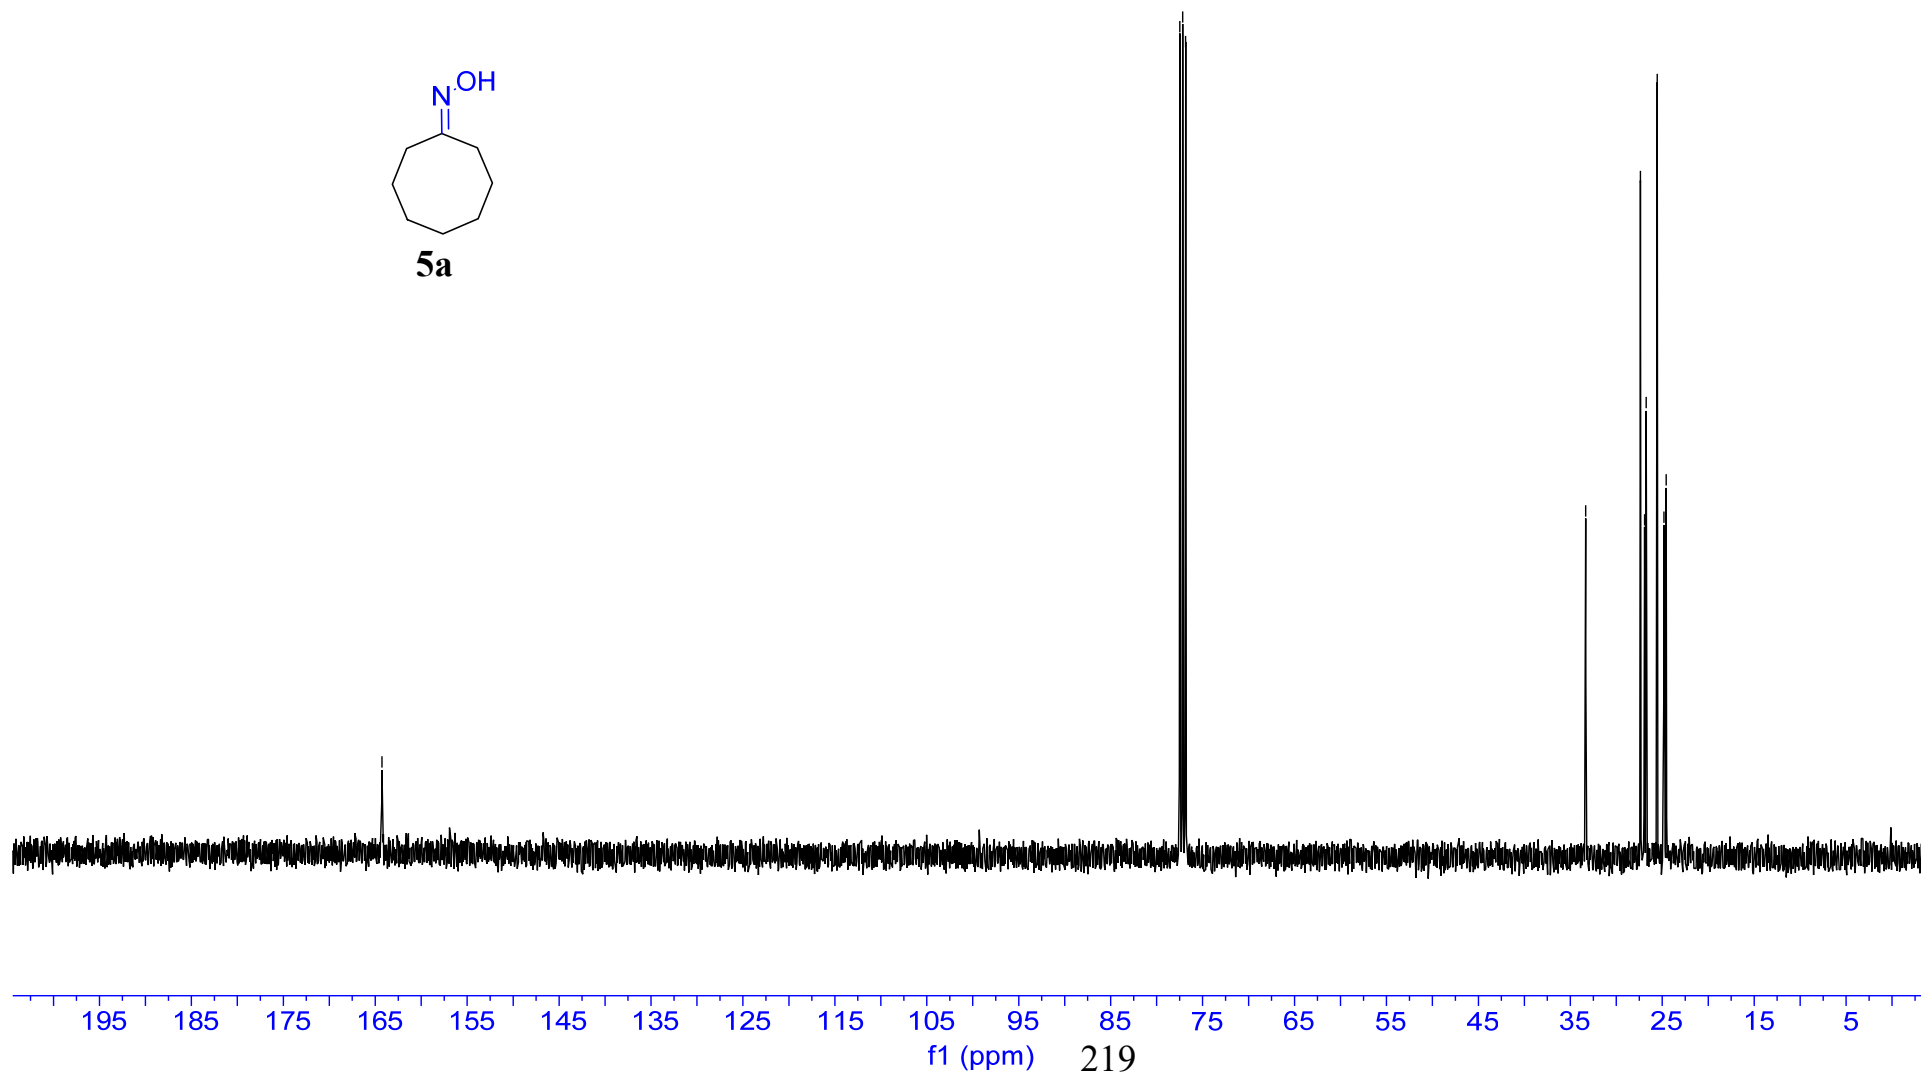

<sup>1</sup>H NMR, 400 MHz, CDCl<sub>3</sub>

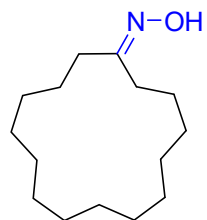

**6a**

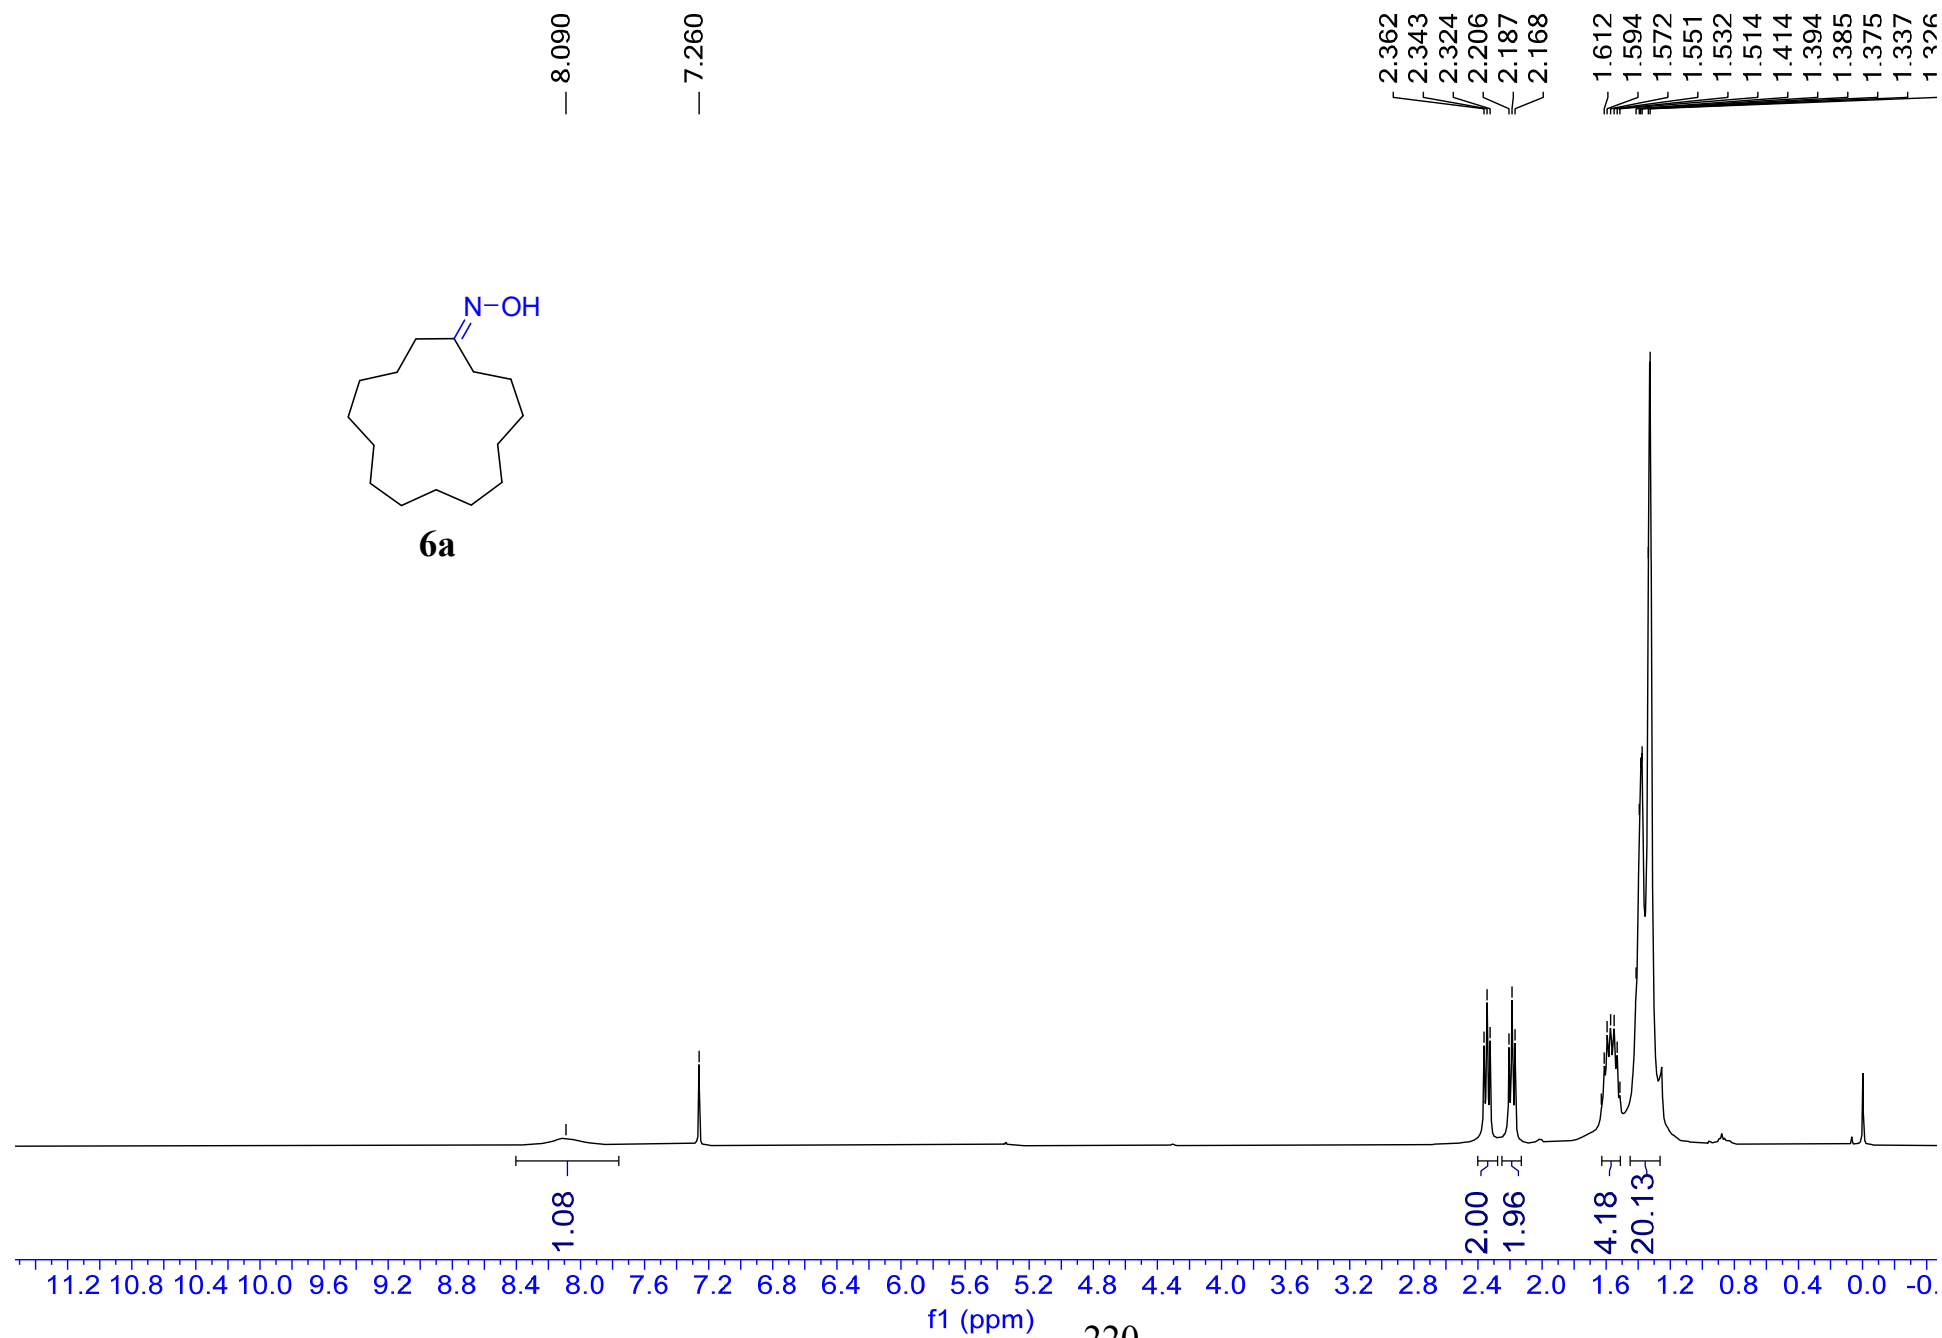



$^{13}\text{C}$  NMR 101 MHz,  $\text{CDCl}_3$



**6a**

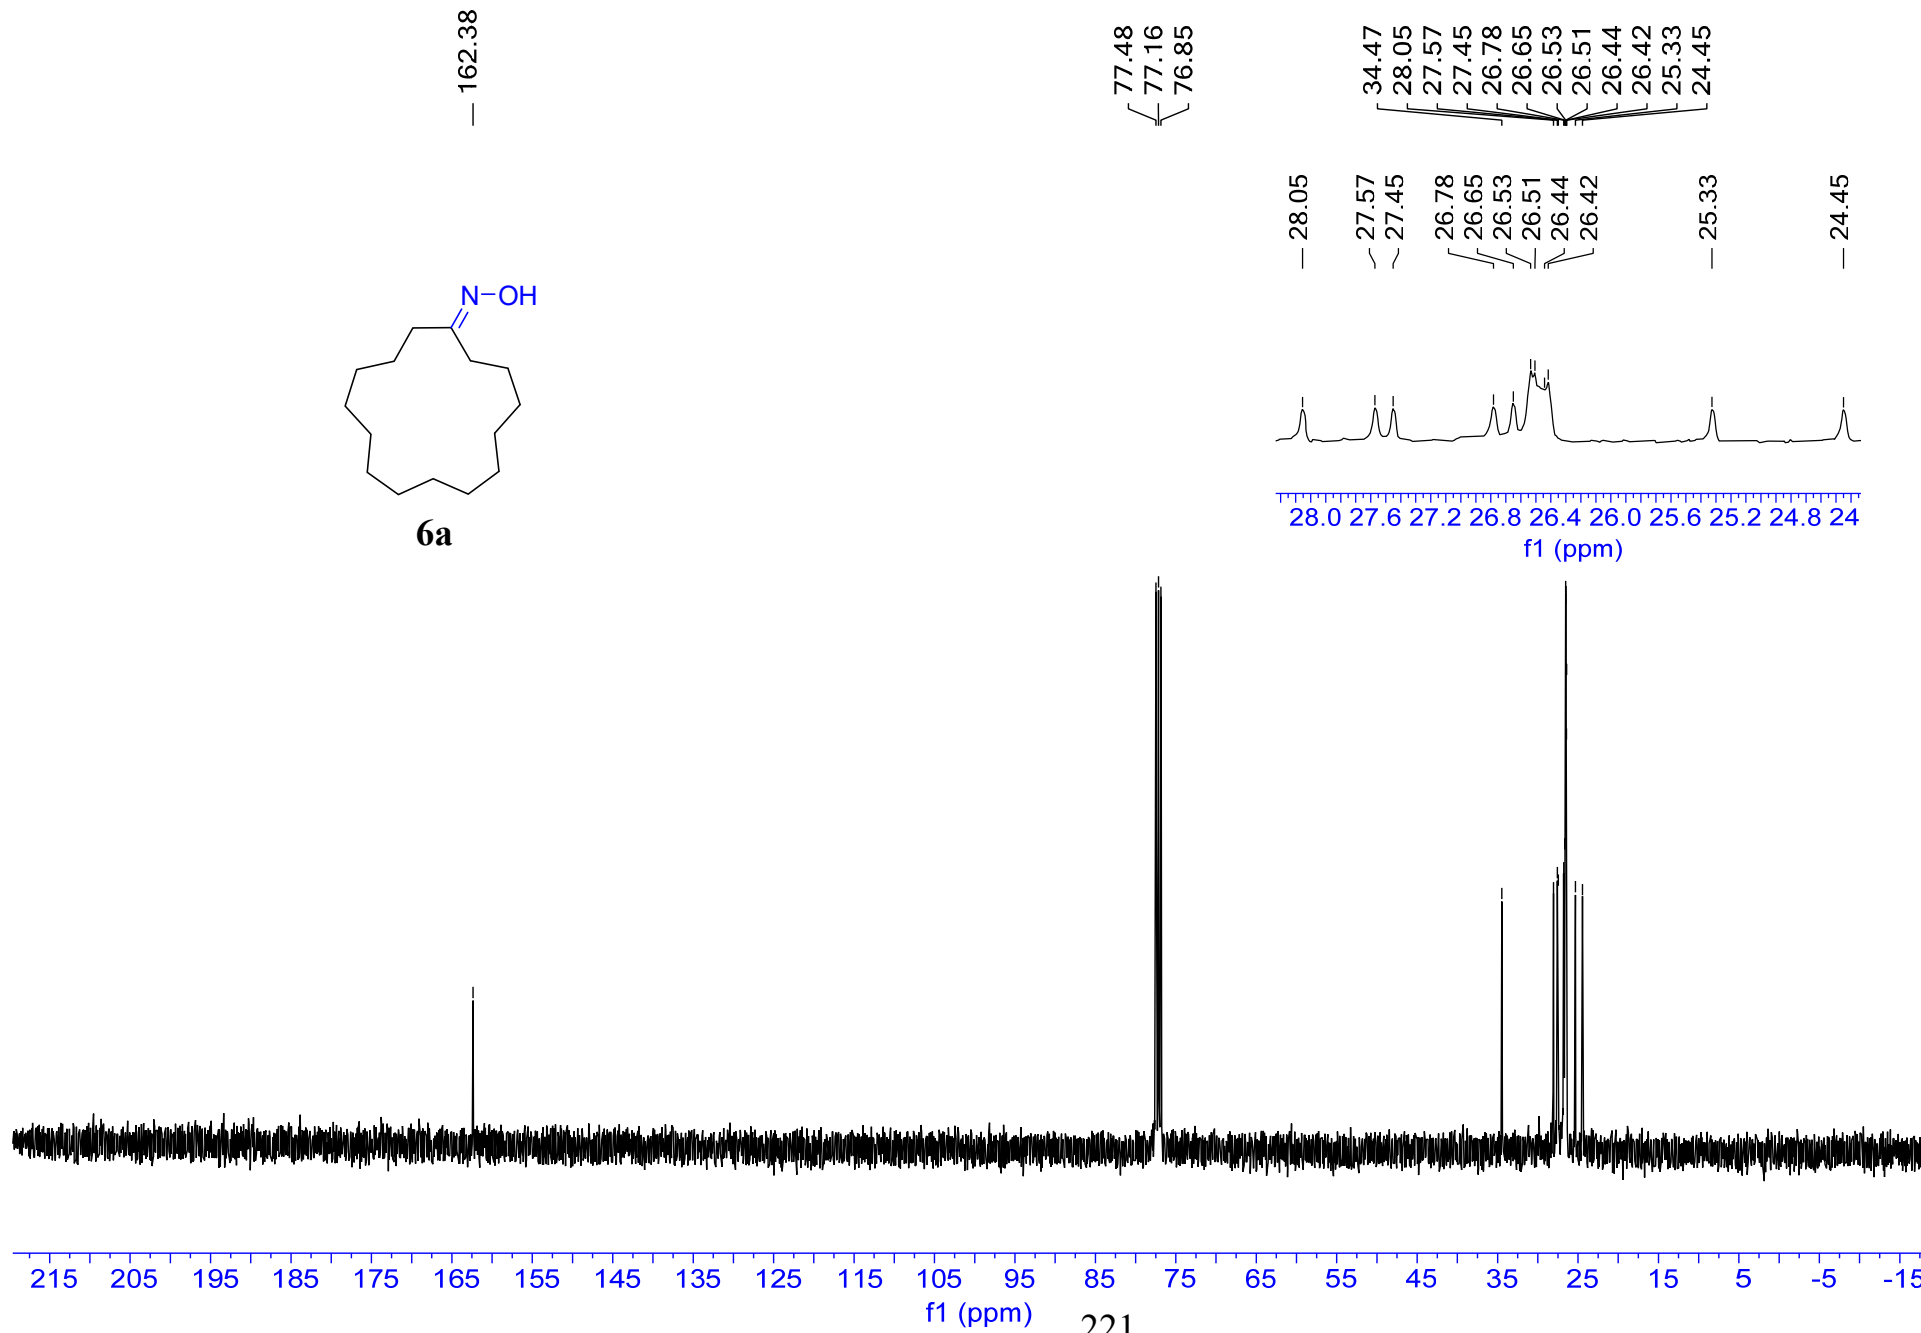

<sup>1</sup>H NMR, 400 MHz, CDCl<sub>3</sub>

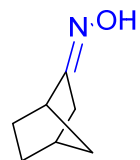

**7a**  
*E/Z*=7:1

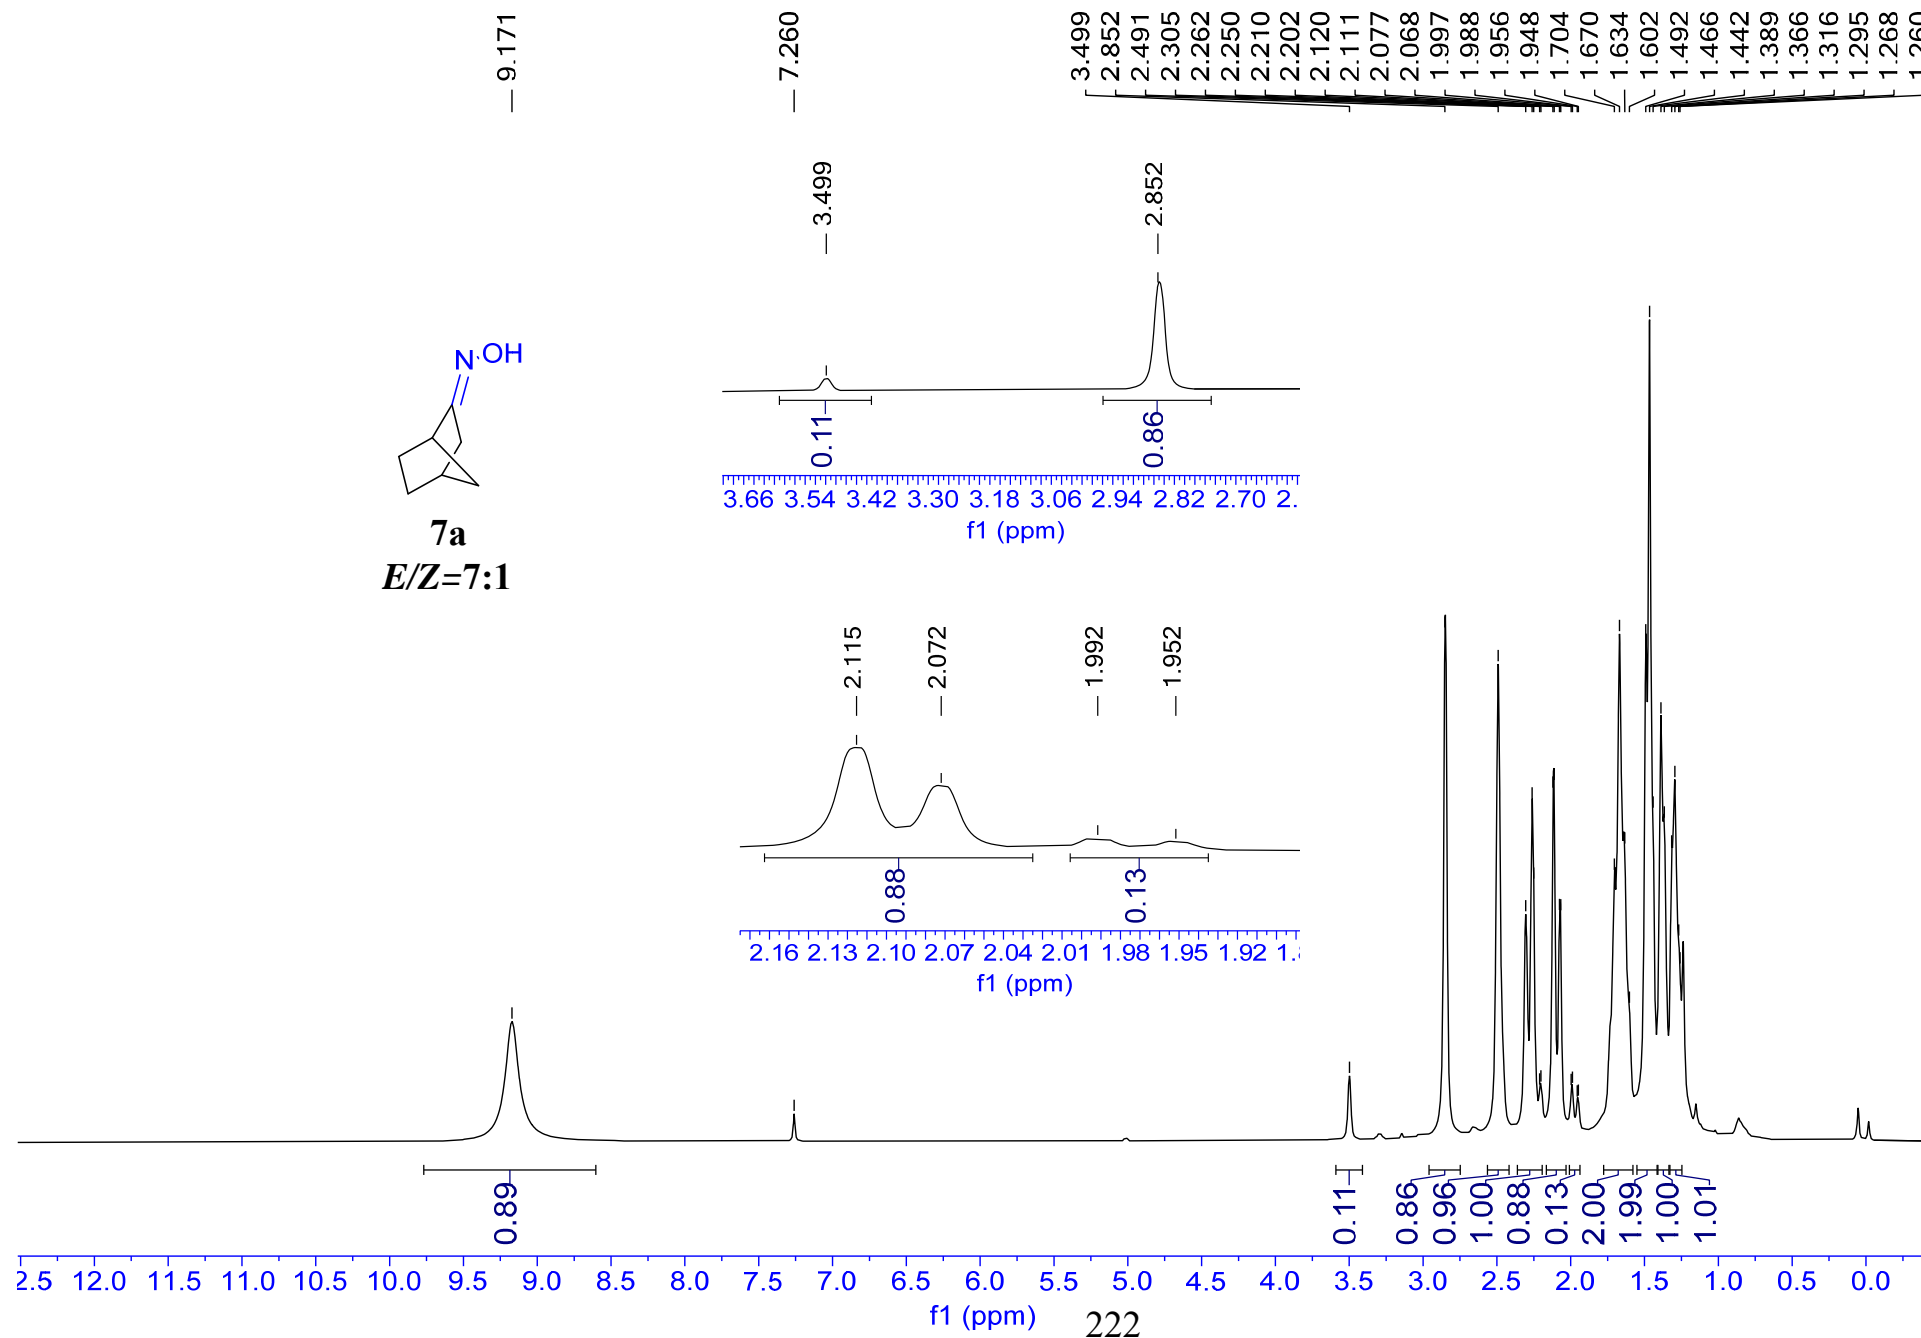

$^{13}\text{C}$  NMR 101 MHz,  $\text{CDCl}_3$

167.94  
167.02

77.48  
77.16  
76.84

42.37  
39.11  
38.57  
37.29  
35.51  
34.86  
27.83  
27.13  
26.02

39.11  
38.57  
38.38

37.29

35.51  
34.86



**7a**  
*E/Z*=7:1

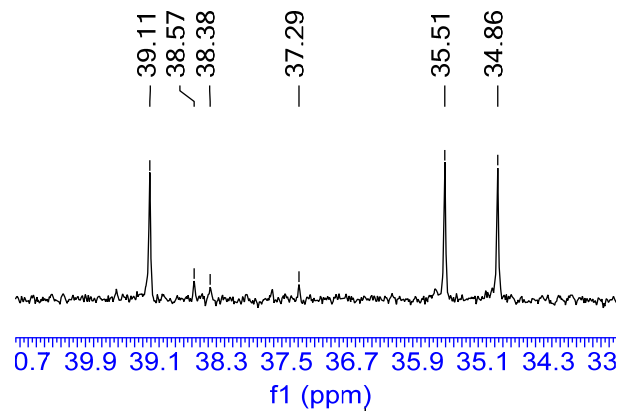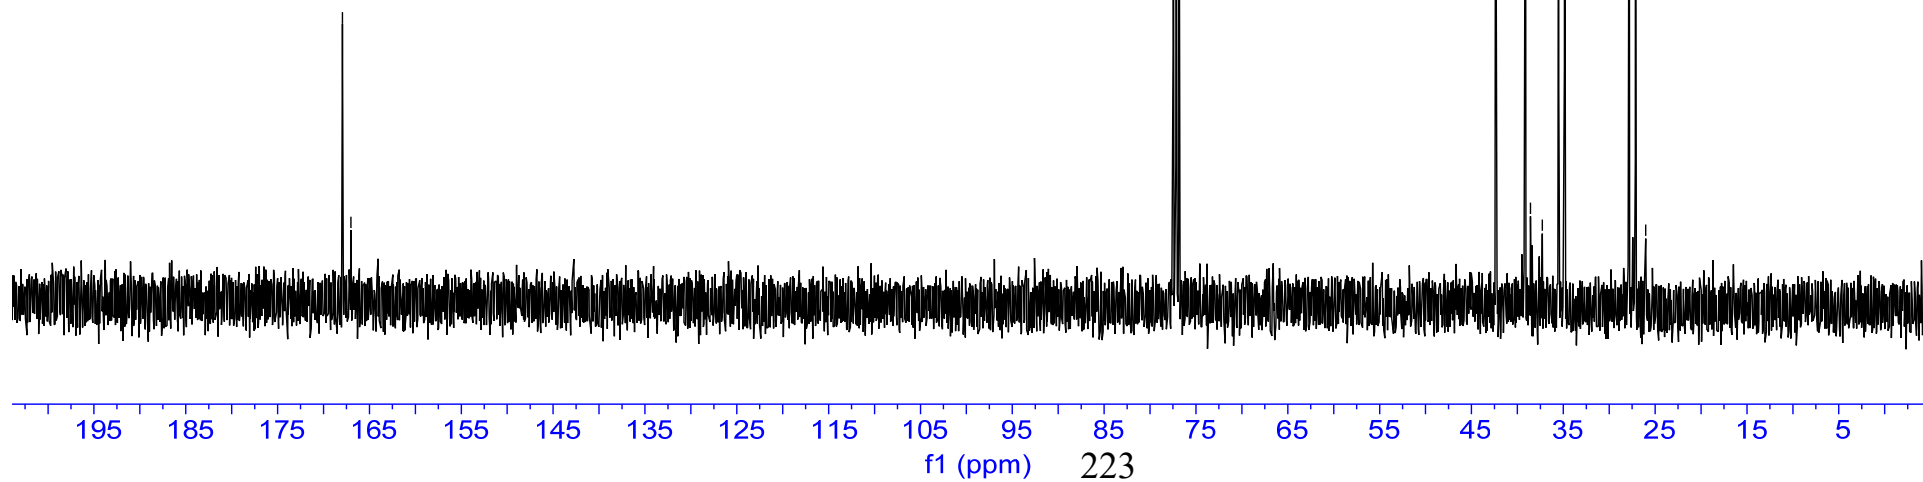

<sup>1</sup>H NMR, 400 MHz, CDCl<sub>3</sub>

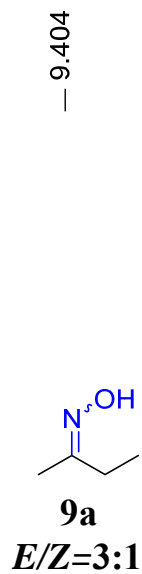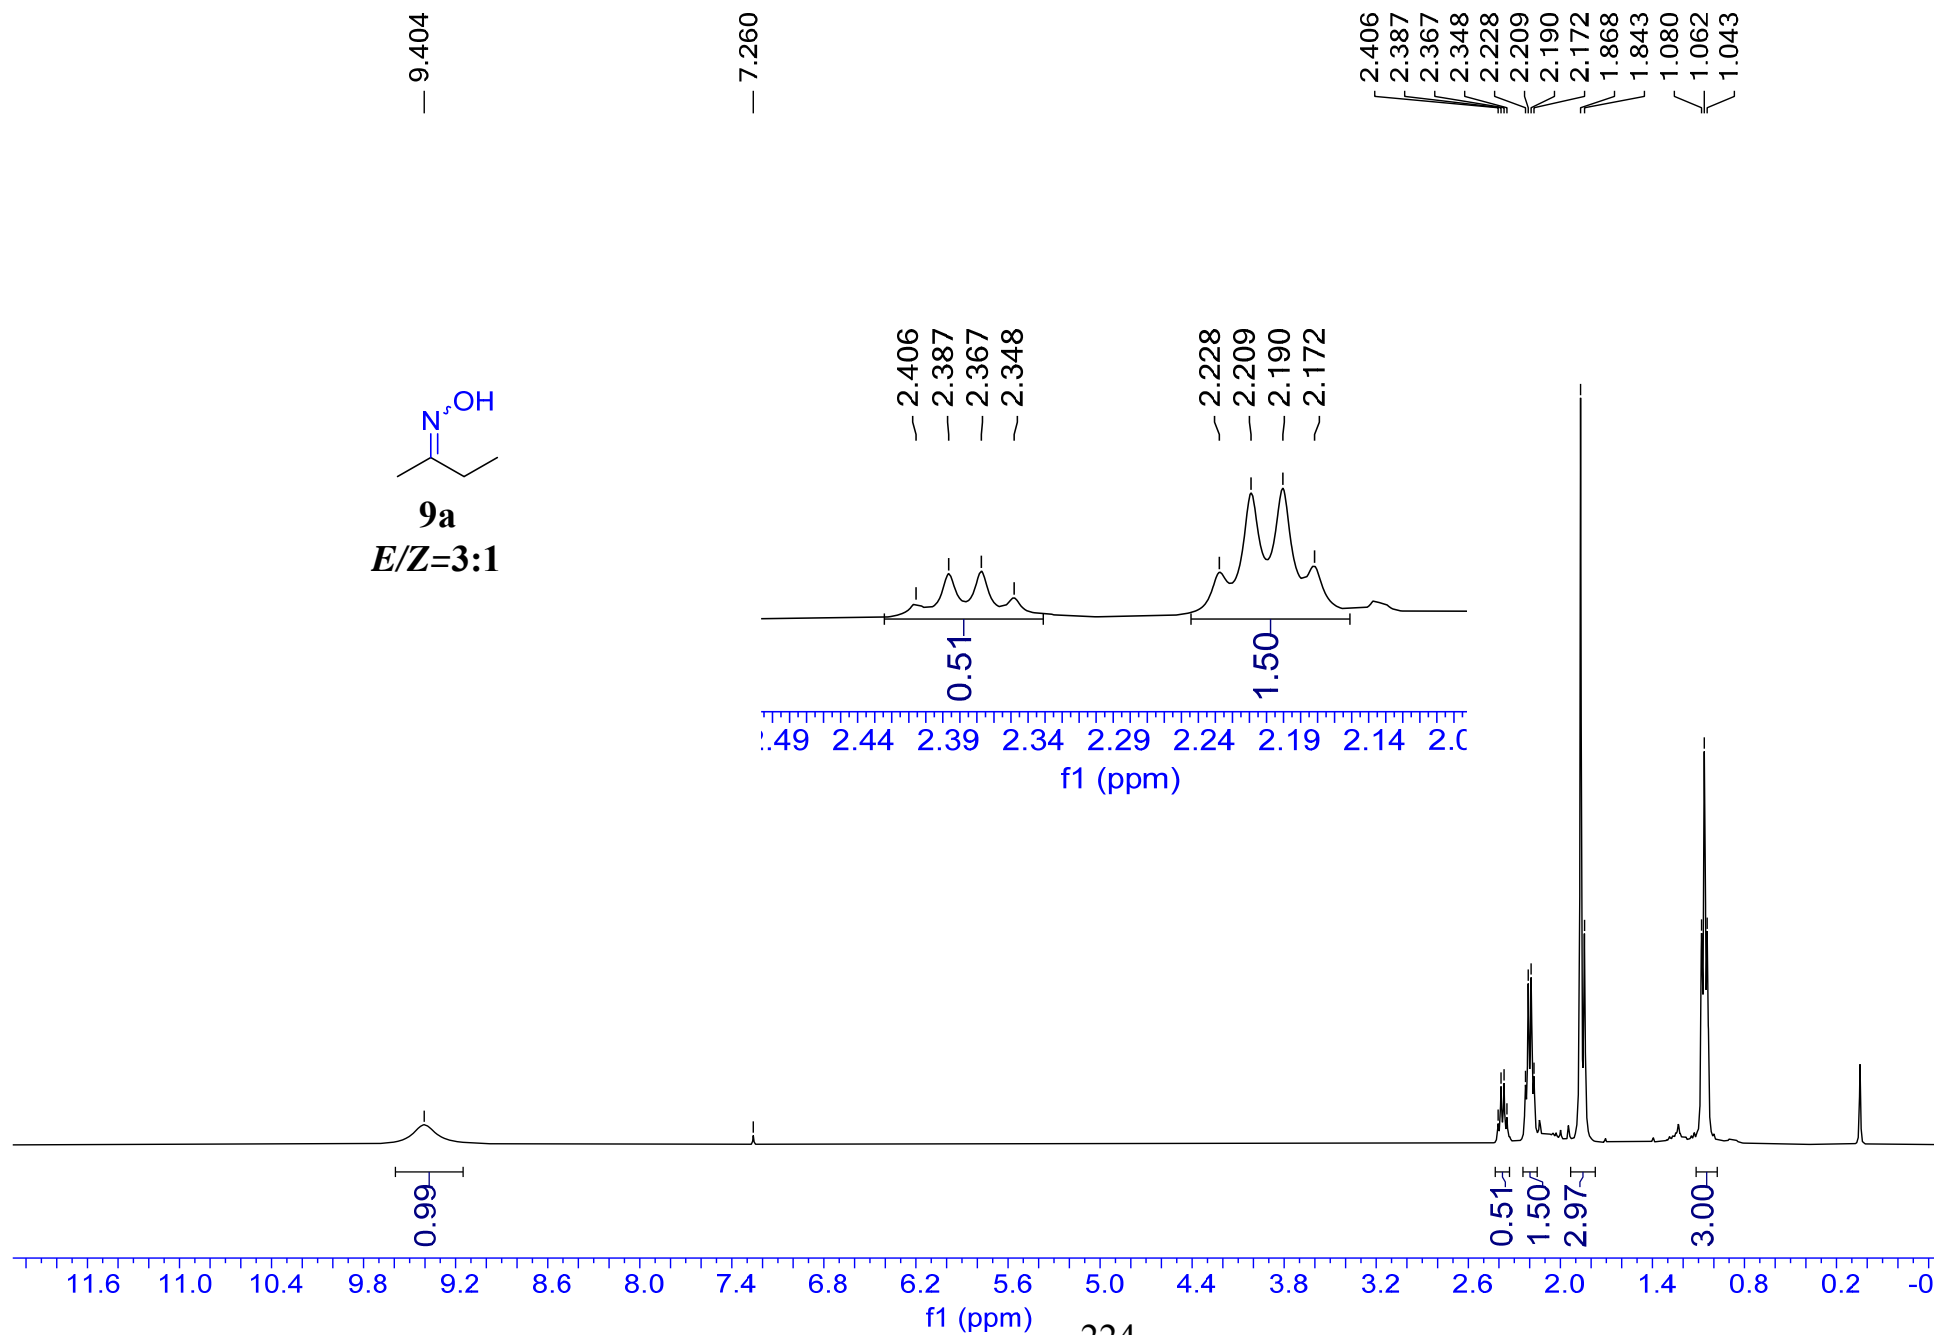

$^{13}\text{C}$  NMR 101 MHz,  $\text{CDCl}_3$

159.98  
159.53

77.48  
77.16  
76.84

29.20  
21.96  
19.20  
13.44  
10.79  
9.87

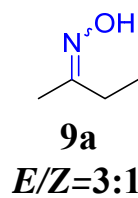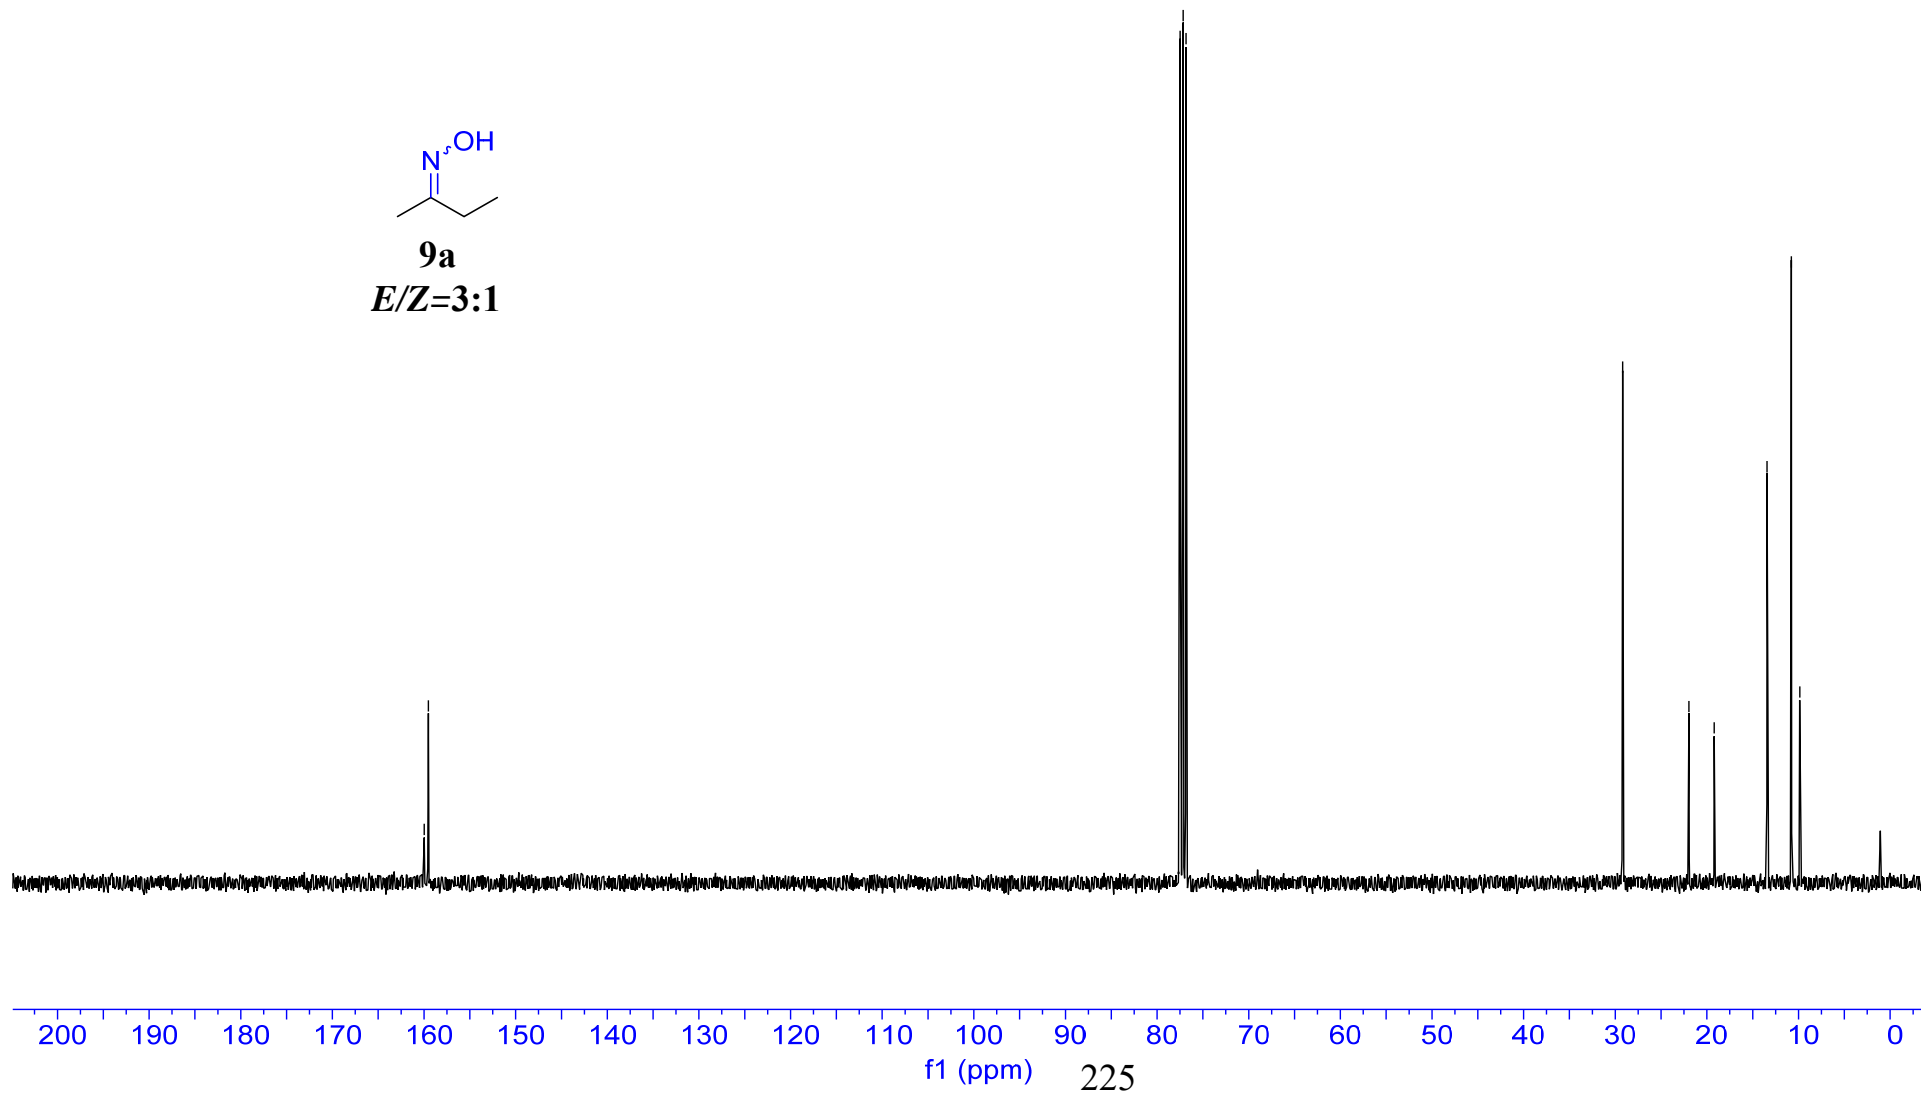

<sup>1</sup>H NMR, 400 MHz, CDCl<sub>3</sub>

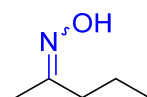

**10a**  
*E/Z*=3:1

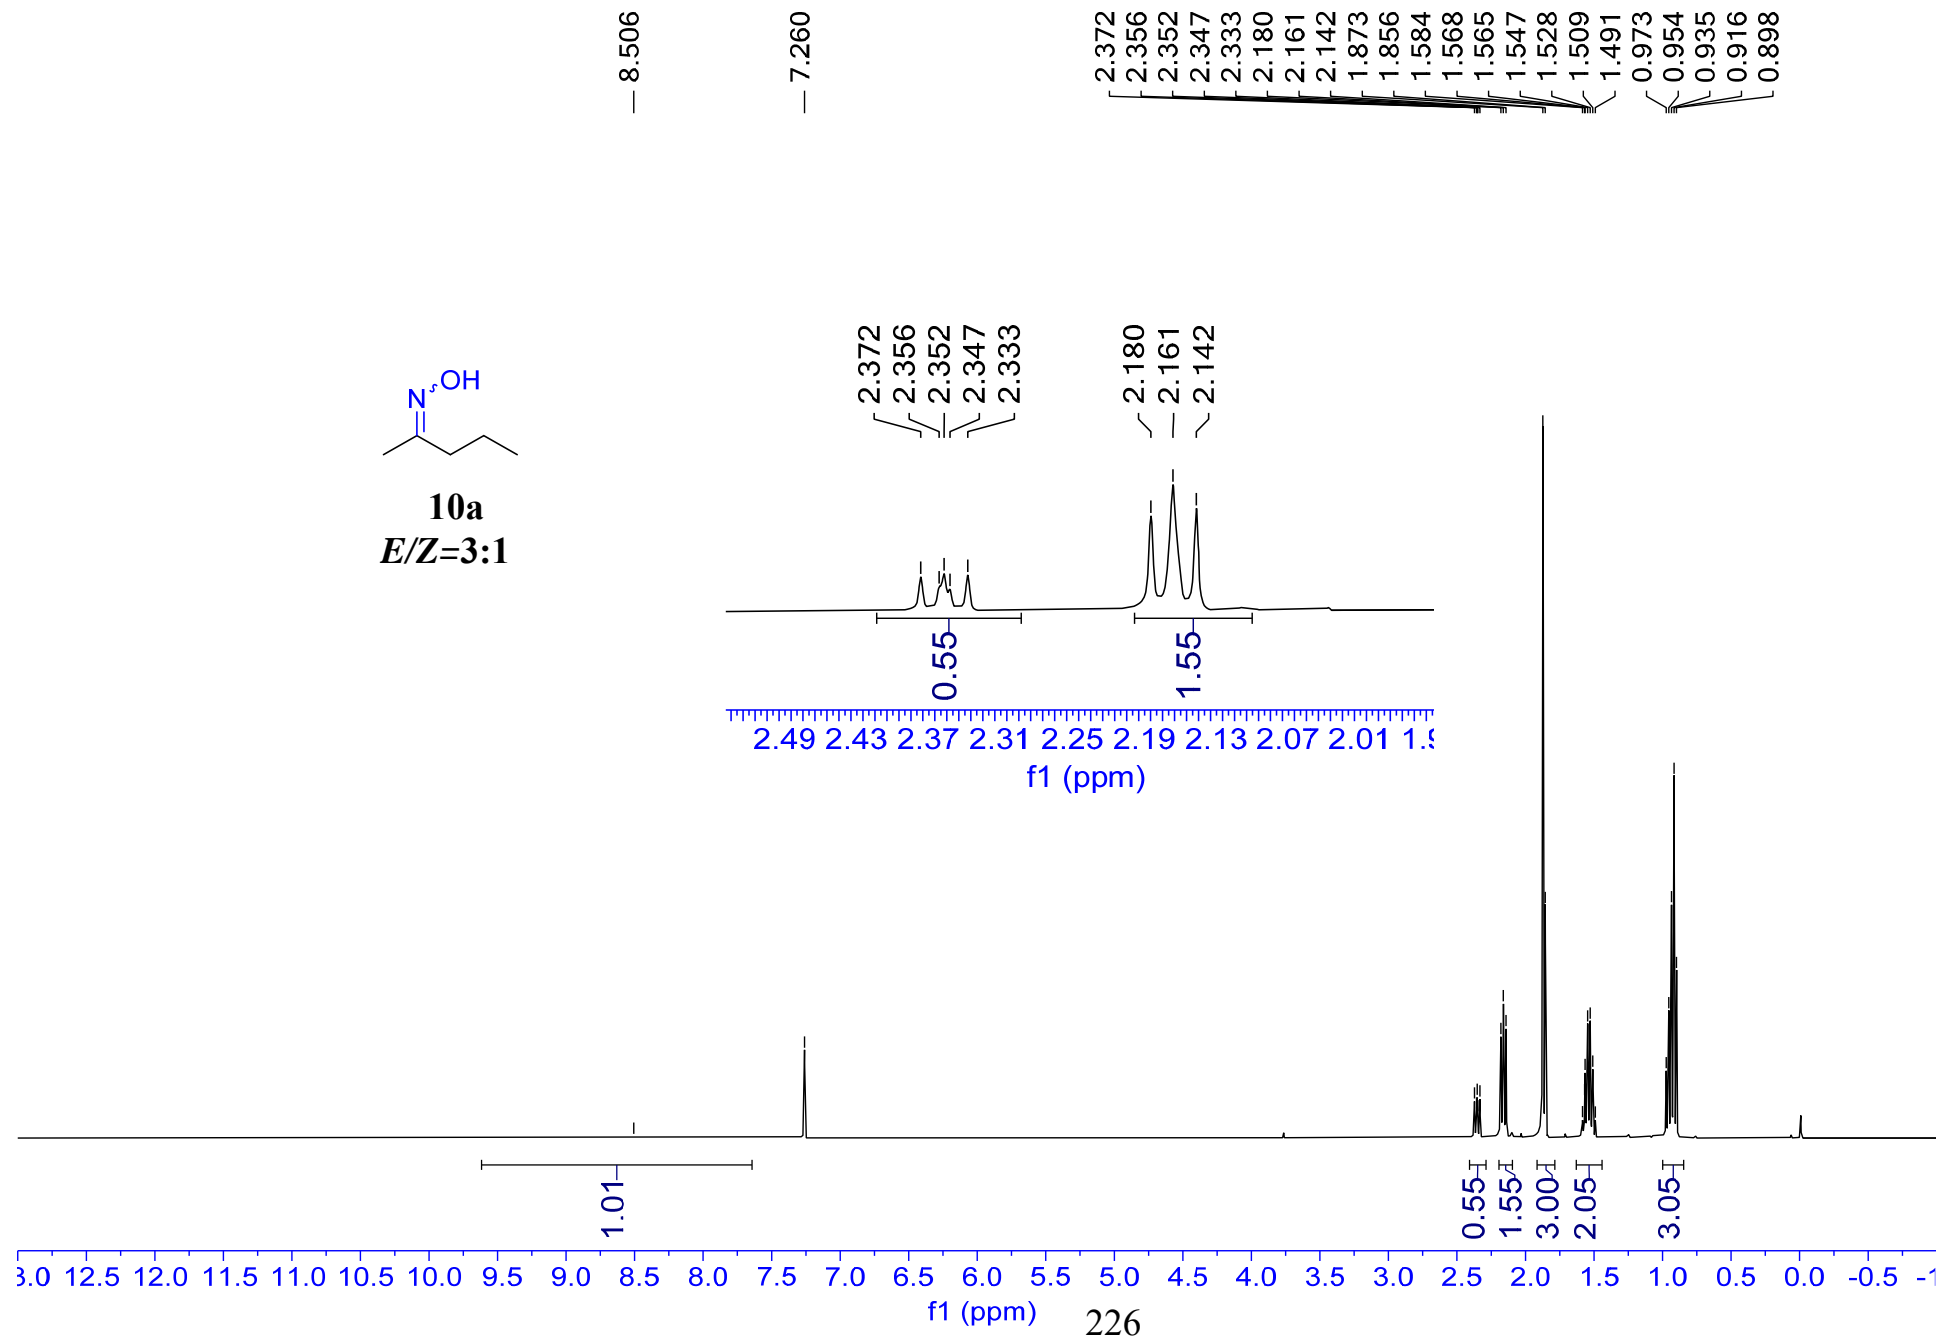

<sup>13</sup>C NMR 101 MHz, CDCl<sub>3</sub>

158.92  
158.53

77.48  
77.16  
76.84

— 37.84

— 30.69

19.89

19.66

18.98

14.26

13.72

13.48

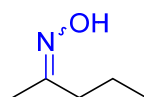

**10a**  
*E/Z*=3:1

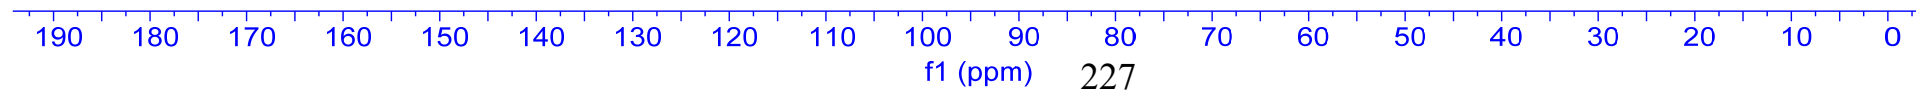

<sup>1</sup>H NMR, 400 MHz, CDCl<sub>3</sub>

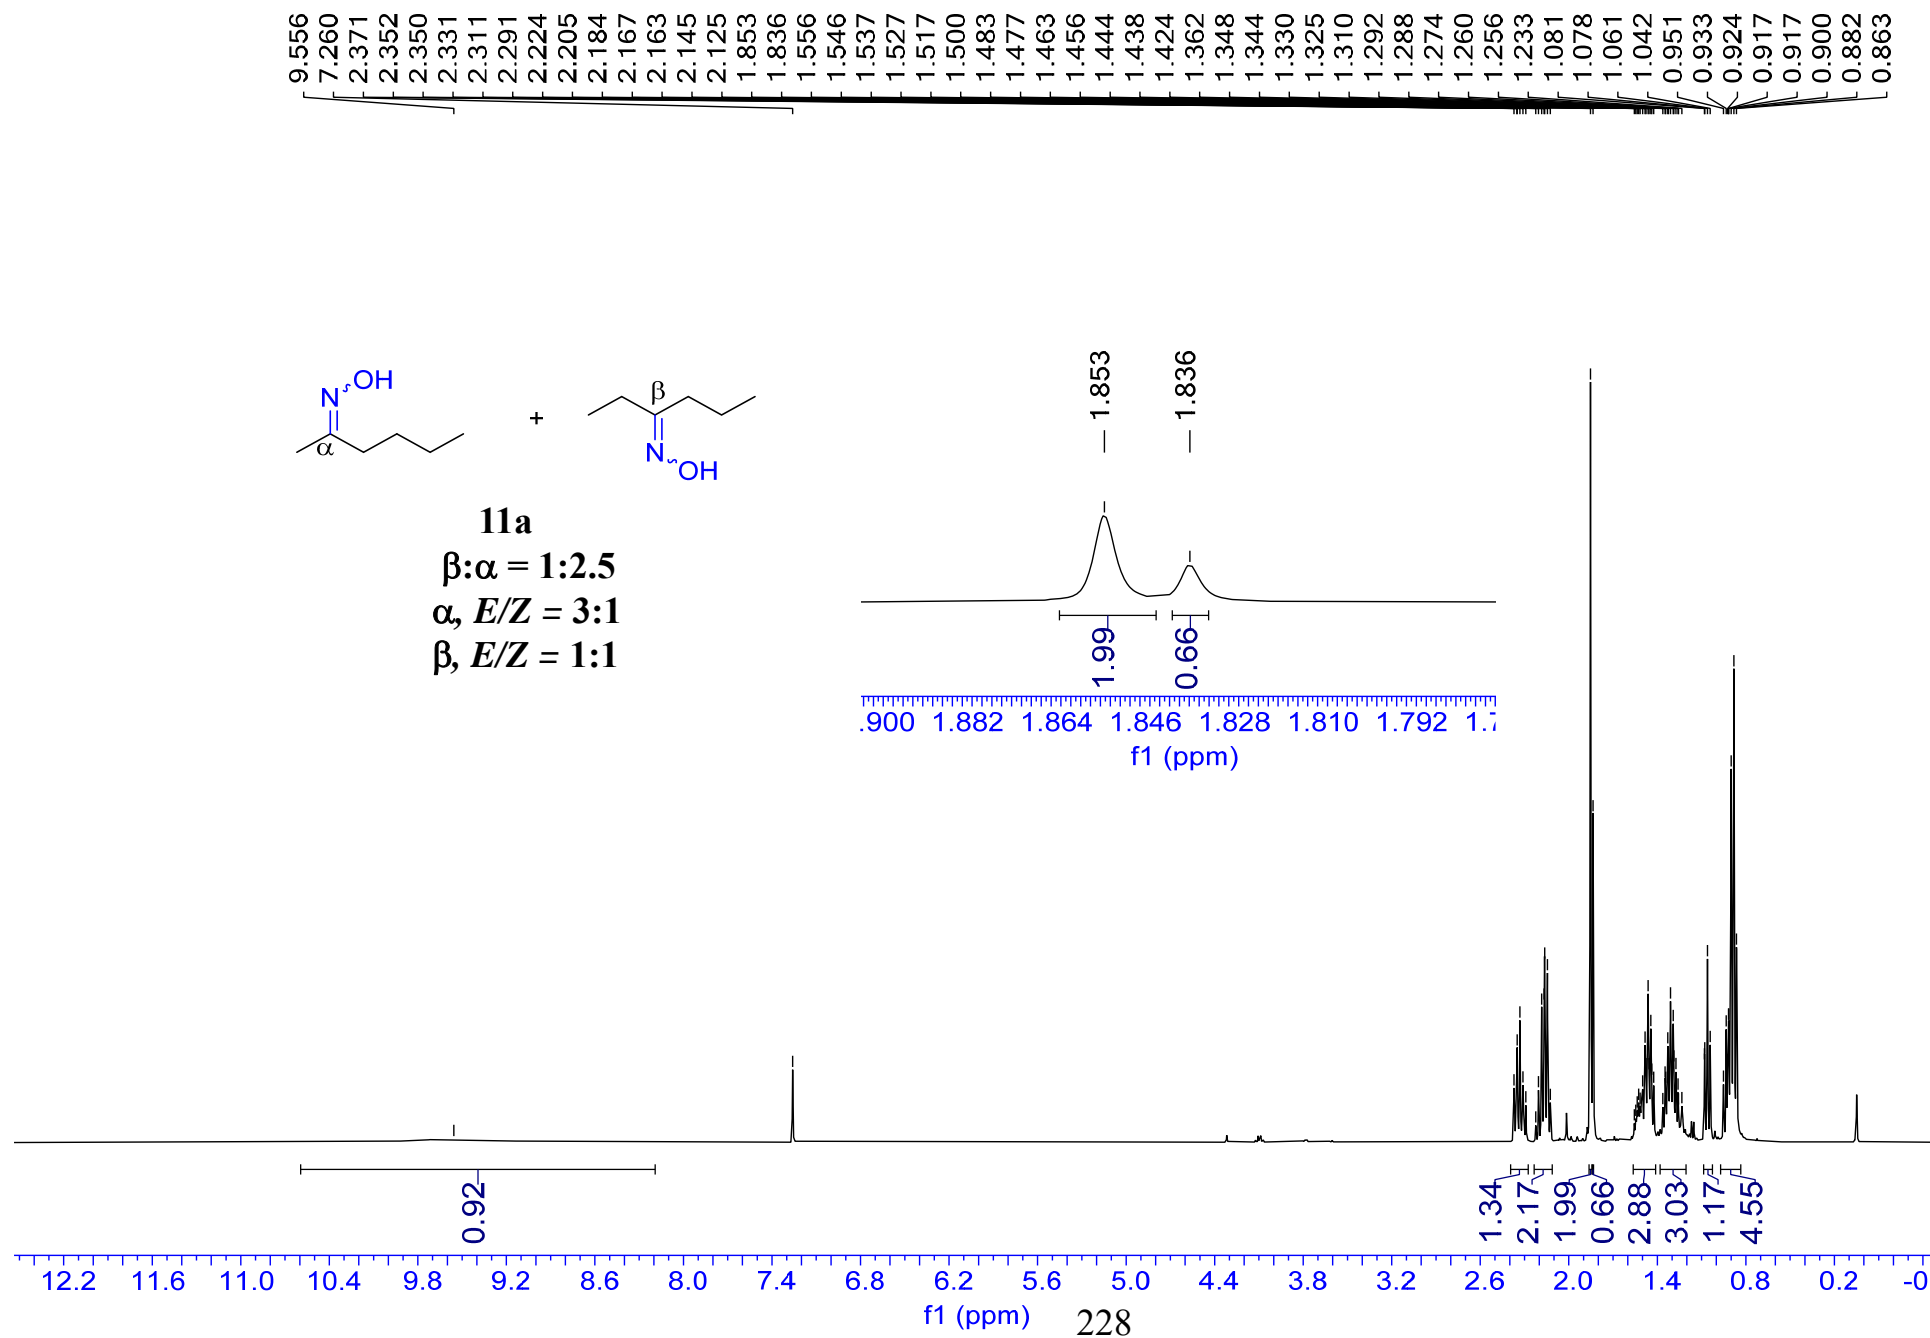



$^{13}\text{C}$  NMR 101 MHz,  $\text{CDCl}_3$

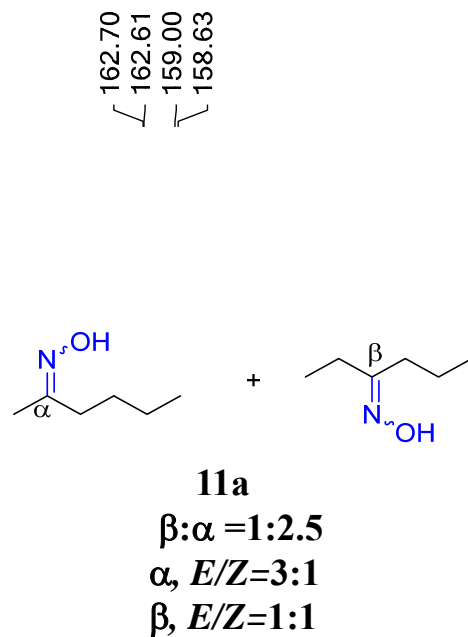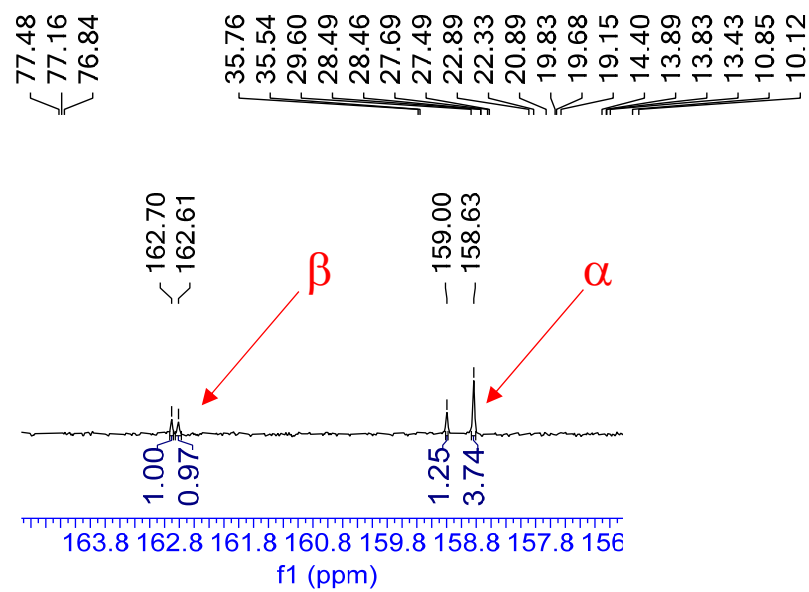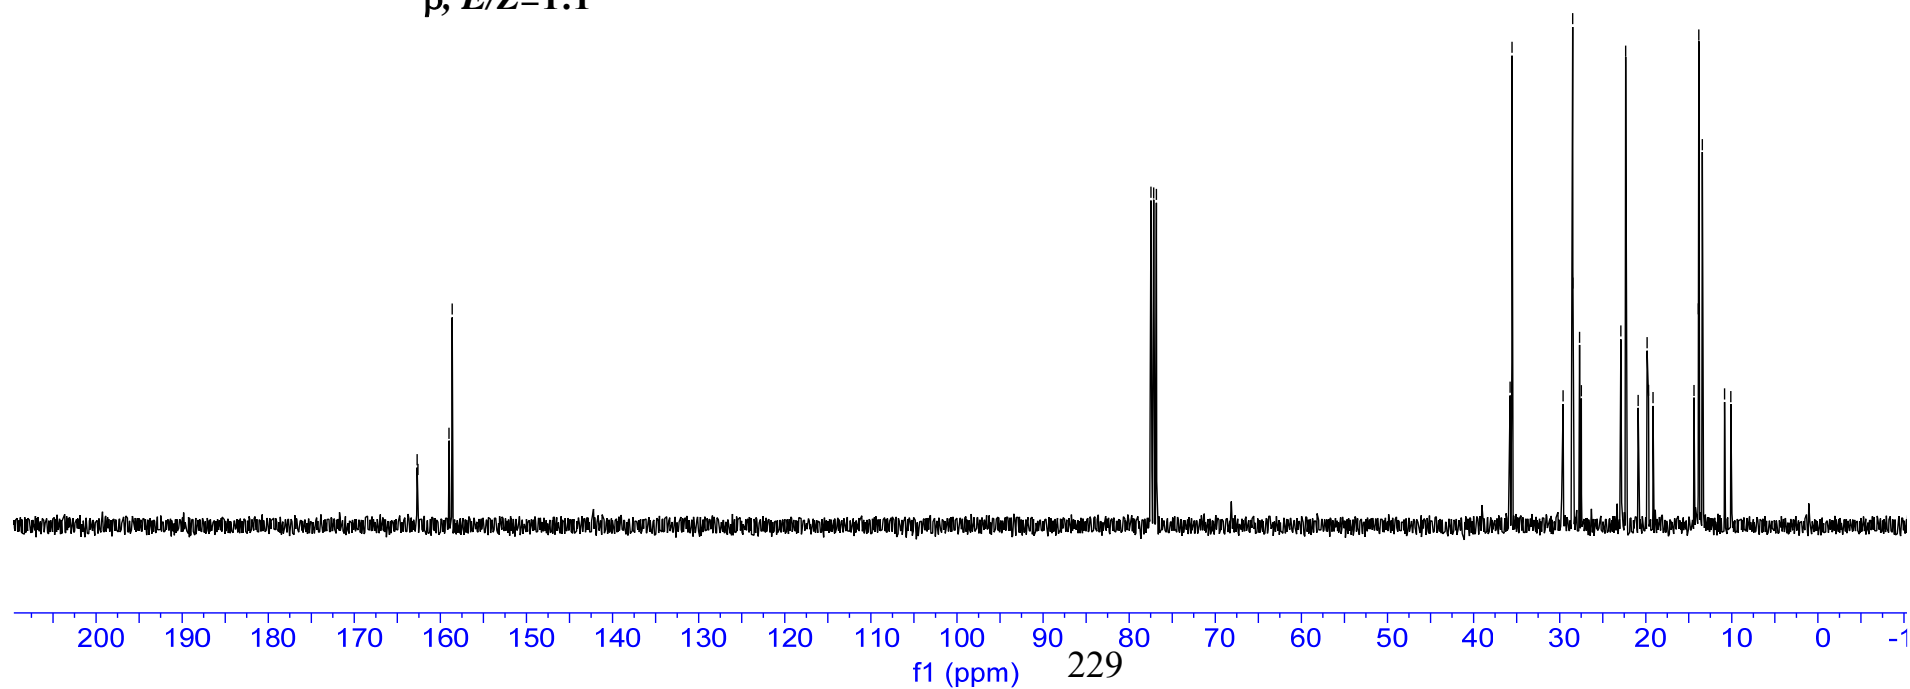

<sup>1</sup>H NMR, 400 MHz, CDCl<sub>3</sub>

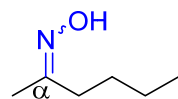

**11a (α-product)**  
*E/Z*=3:1

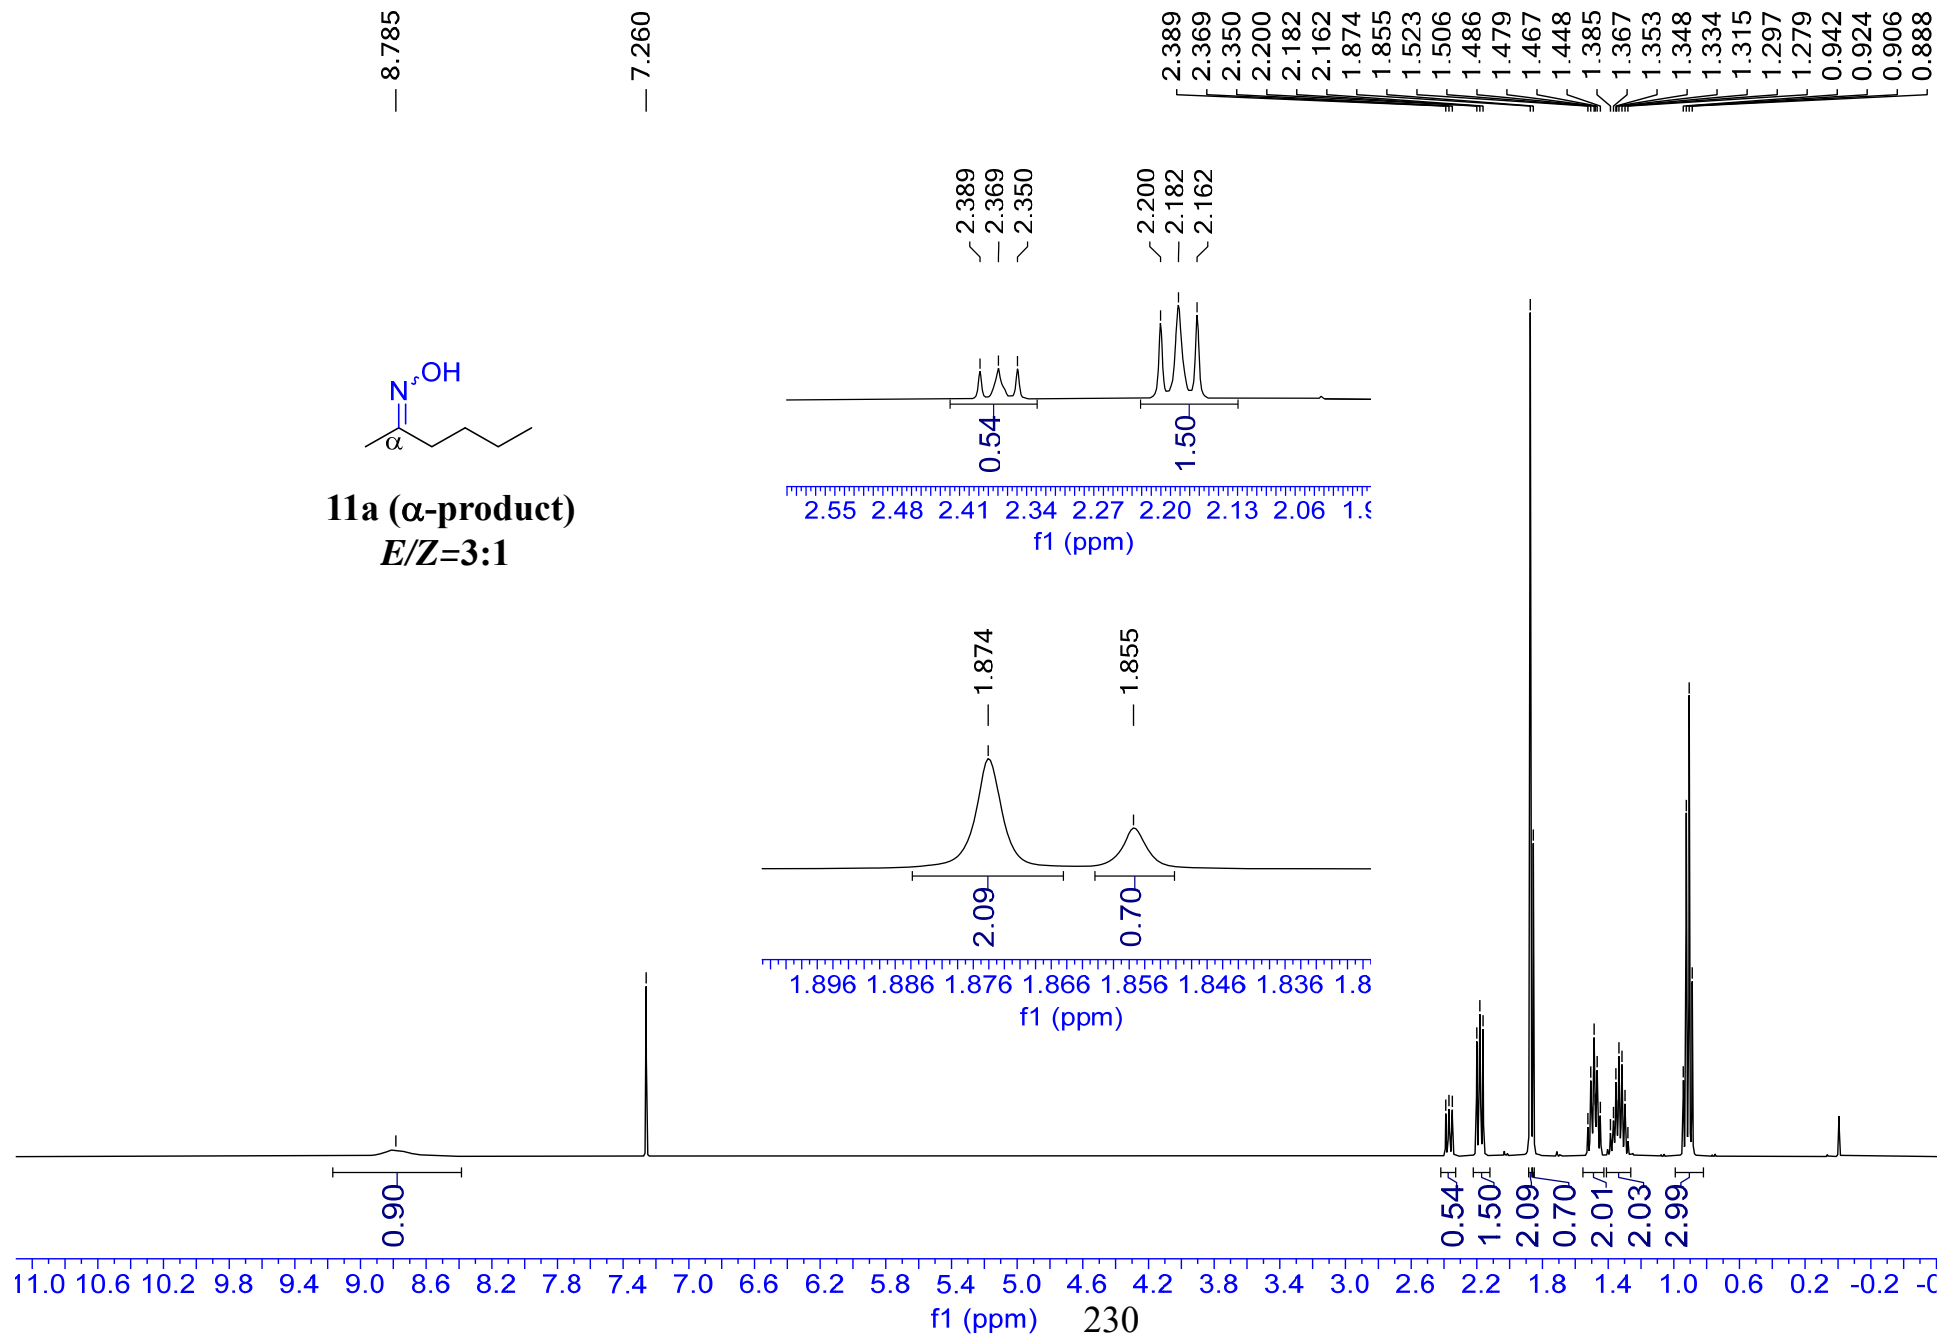

$^{13}\text{C}$  NMR 101 MHz,  $\text{CDCl}_3$

159.05  
158.69

77.48  
77.16  
76.84

35.53  
35.52  
28.50  
28.47  
27.68  
22.89  
22.33  
19.83  
13.90  
13.84  
13.43

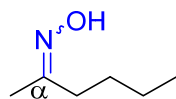

**11a ( $\alpha$ -product)**  
*E/Z=3:1*

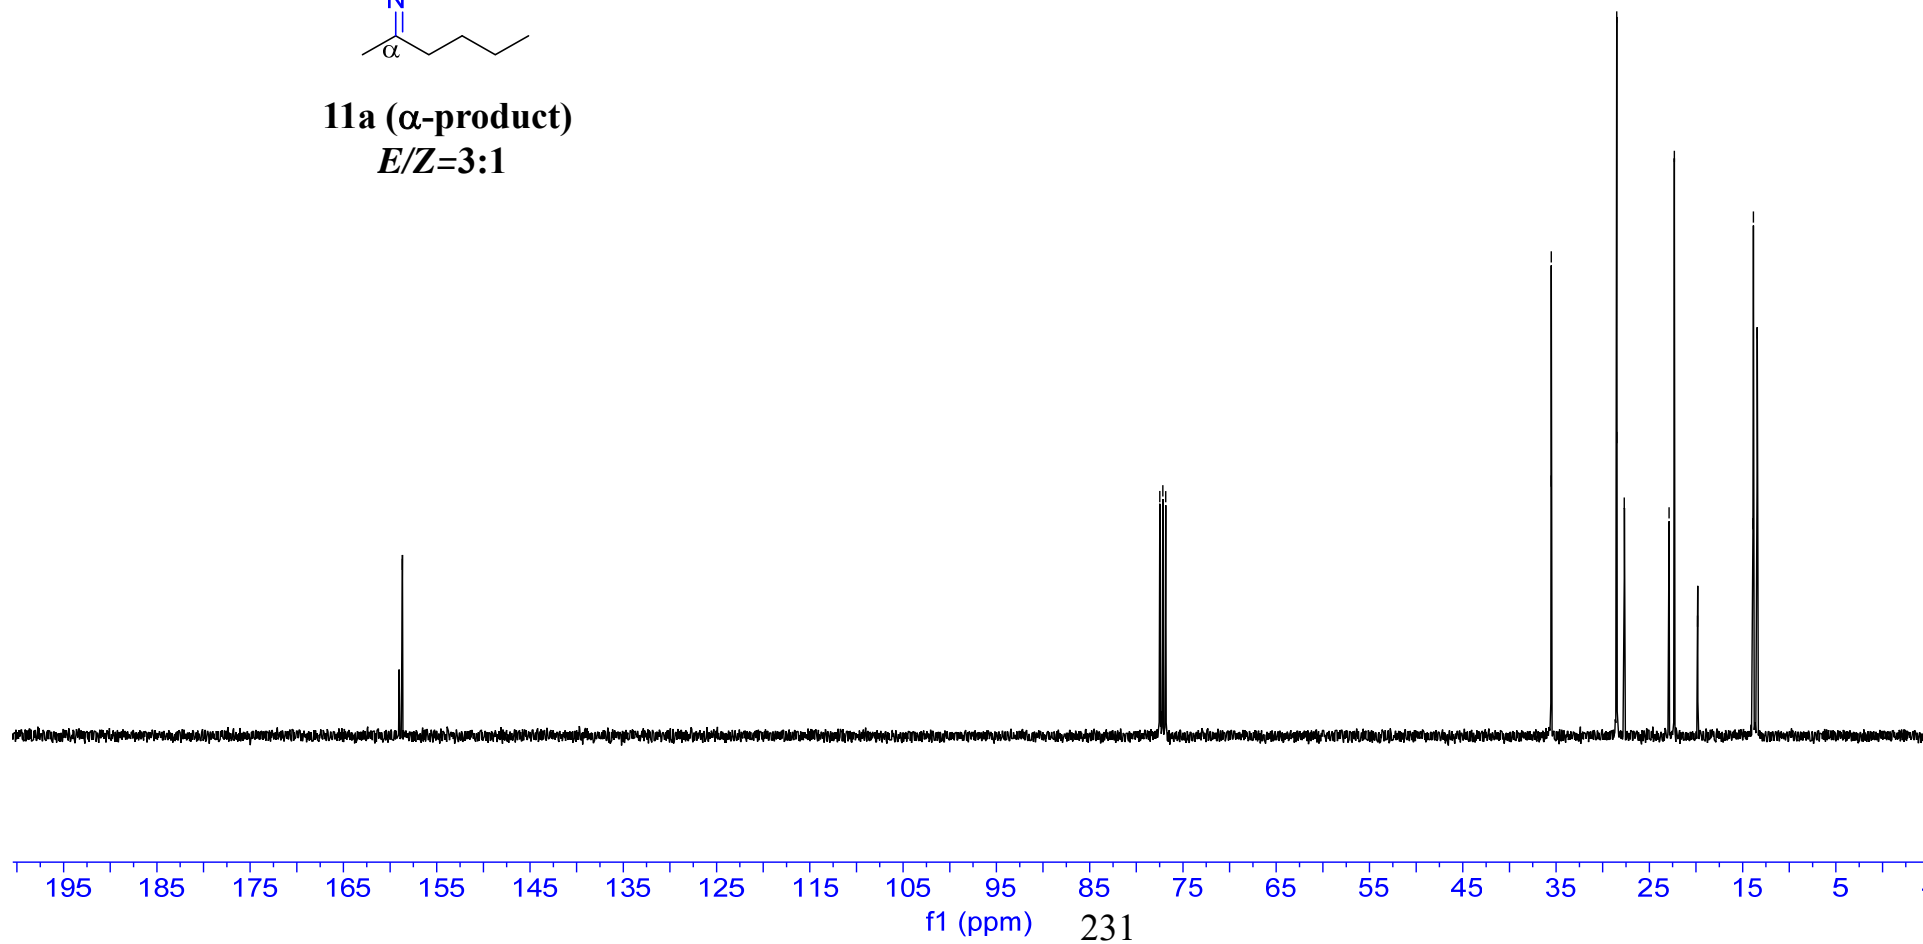

<sup>1</sup>H NMR, 400 MHz, CDCl<sub>3</sub>

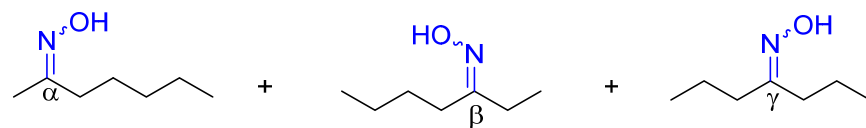

**12a**  
 $\gamma:\beta:\alpha = 1:3.3:8.3$   
 $\alpha, E/Z = 3:1$   
 $\beta, E/Z = 1:1$

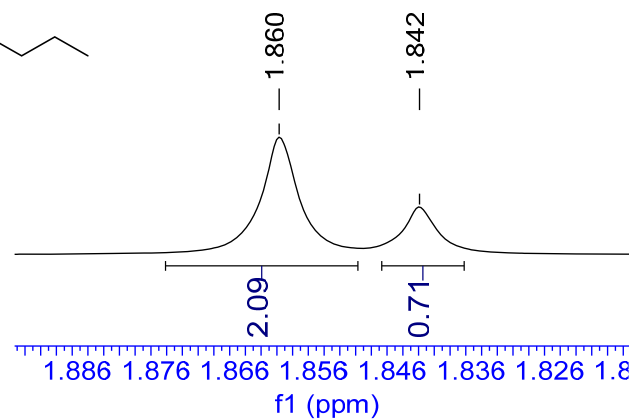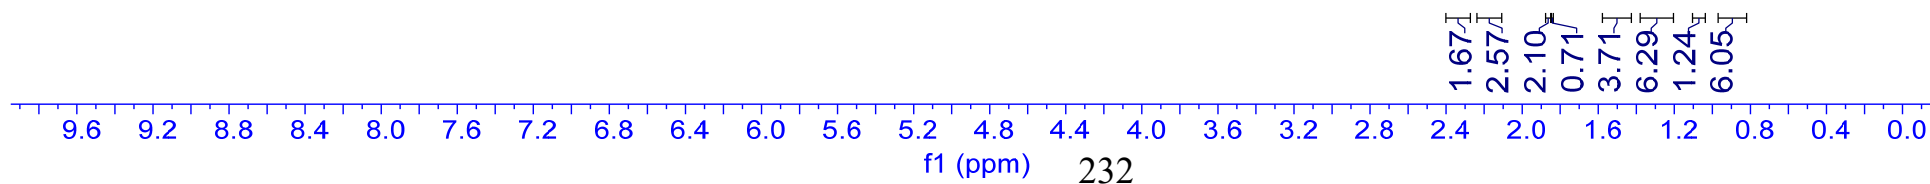

7.260  
 2.368  
 2.359  
 2.355  
 2.349  
 2.340  
 2.329  
 2.316  
 2.305  
 2.285  
 2.232  
 2.213  
 2.194  
 2.181  
 2.162  
 2.158  
 2.142  
 2.120  
 1.860  
 1.842  
 1.559  
 1.546  
 1.541  
 1.524  
 1.521  
 1.506  
 1.487  
 1.483  
 1.482  
 1.473  
 1.468  
 1.453  
 1.440  
 1.436  
 1.313  
 1.294  
 1.286  
 1.280  
 1.276  
 1.268  
 1.240  
 1.085  
 1.067  
 1.049  
 0.957  
 0.939  
 0.923  
 0.906  
 0.885  
 0.876  
 0.868  
 0.850

$^{13}\text{C}$  NMR 101 MHz,  $\text{CDCl}_3$

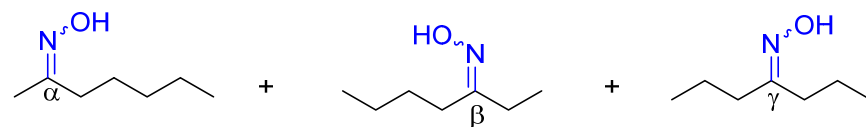

**12a**  
 $\gamma:\beta:\alpha = 1:3.3:8.3$   
 $\alpha, E/Z = 3:1$   
 $\beta, E/Z = 1:1$

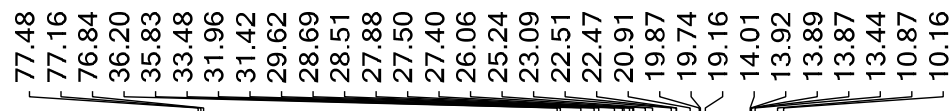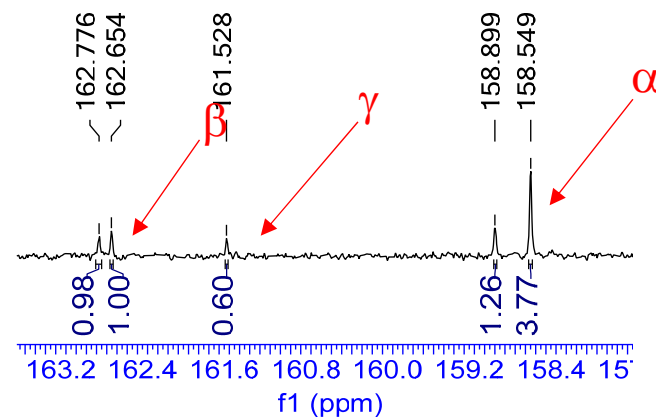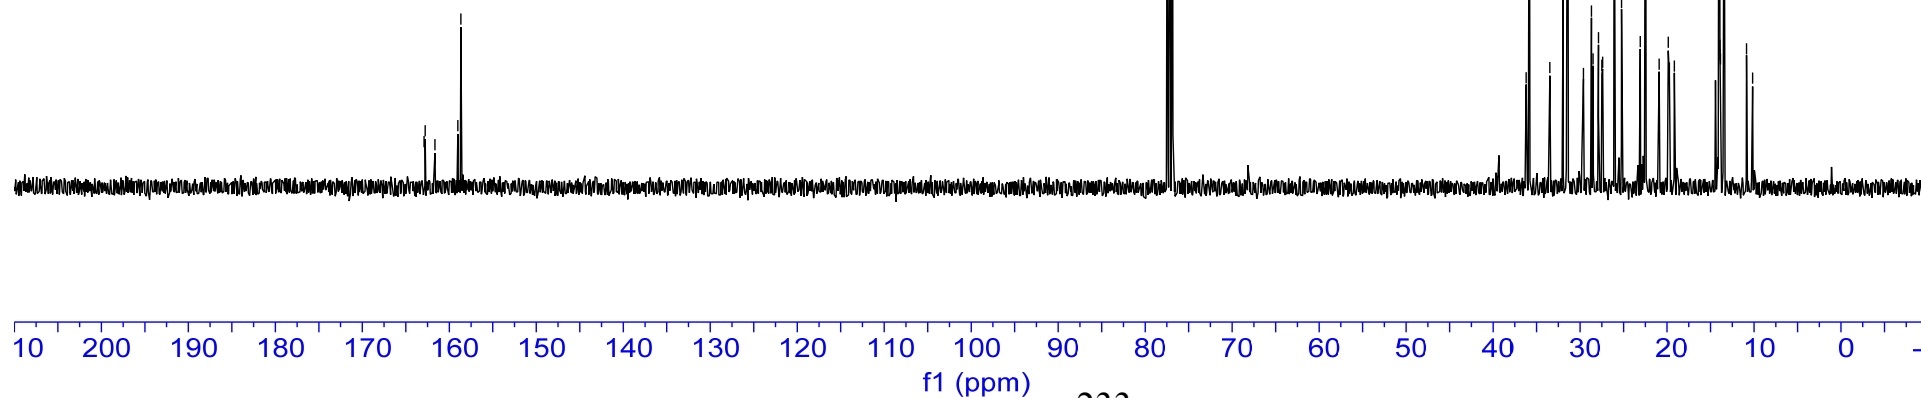

<sup>1</sup>H NMR, 400 MHz, CDCl<sub>3</sub>

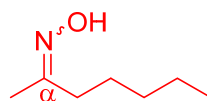

**12a+12a-α** (synthesis from ketone **12-one** : see section 8)

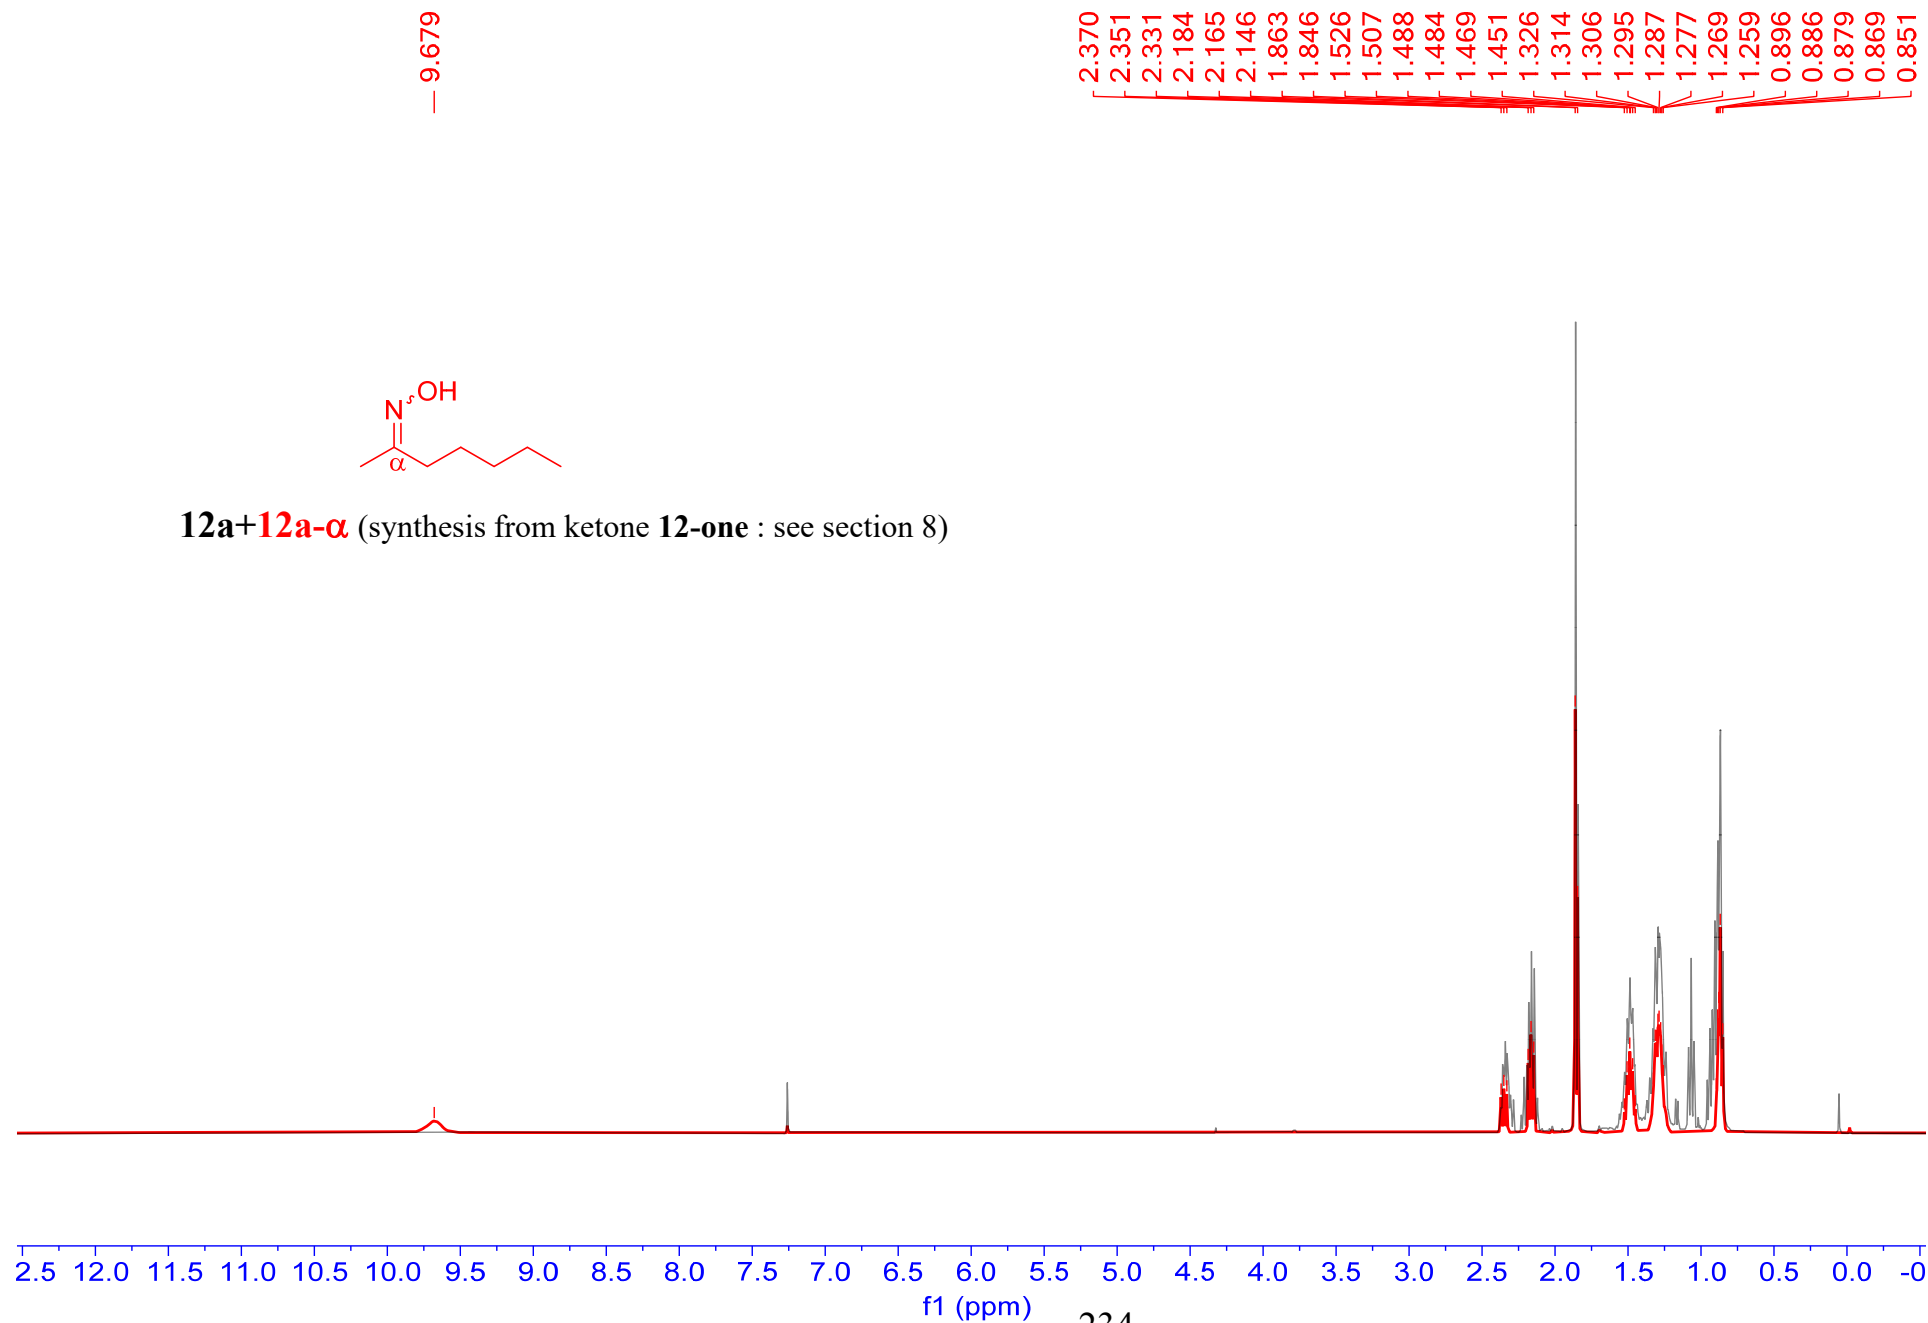

$^{13}\text{C}$  NMR 101 MHz,  $\text{CDCl}_3$

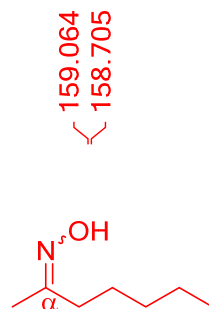

**12a+12a- $\alpha$**  (synthesis from ketone **12-one**: see section 8)

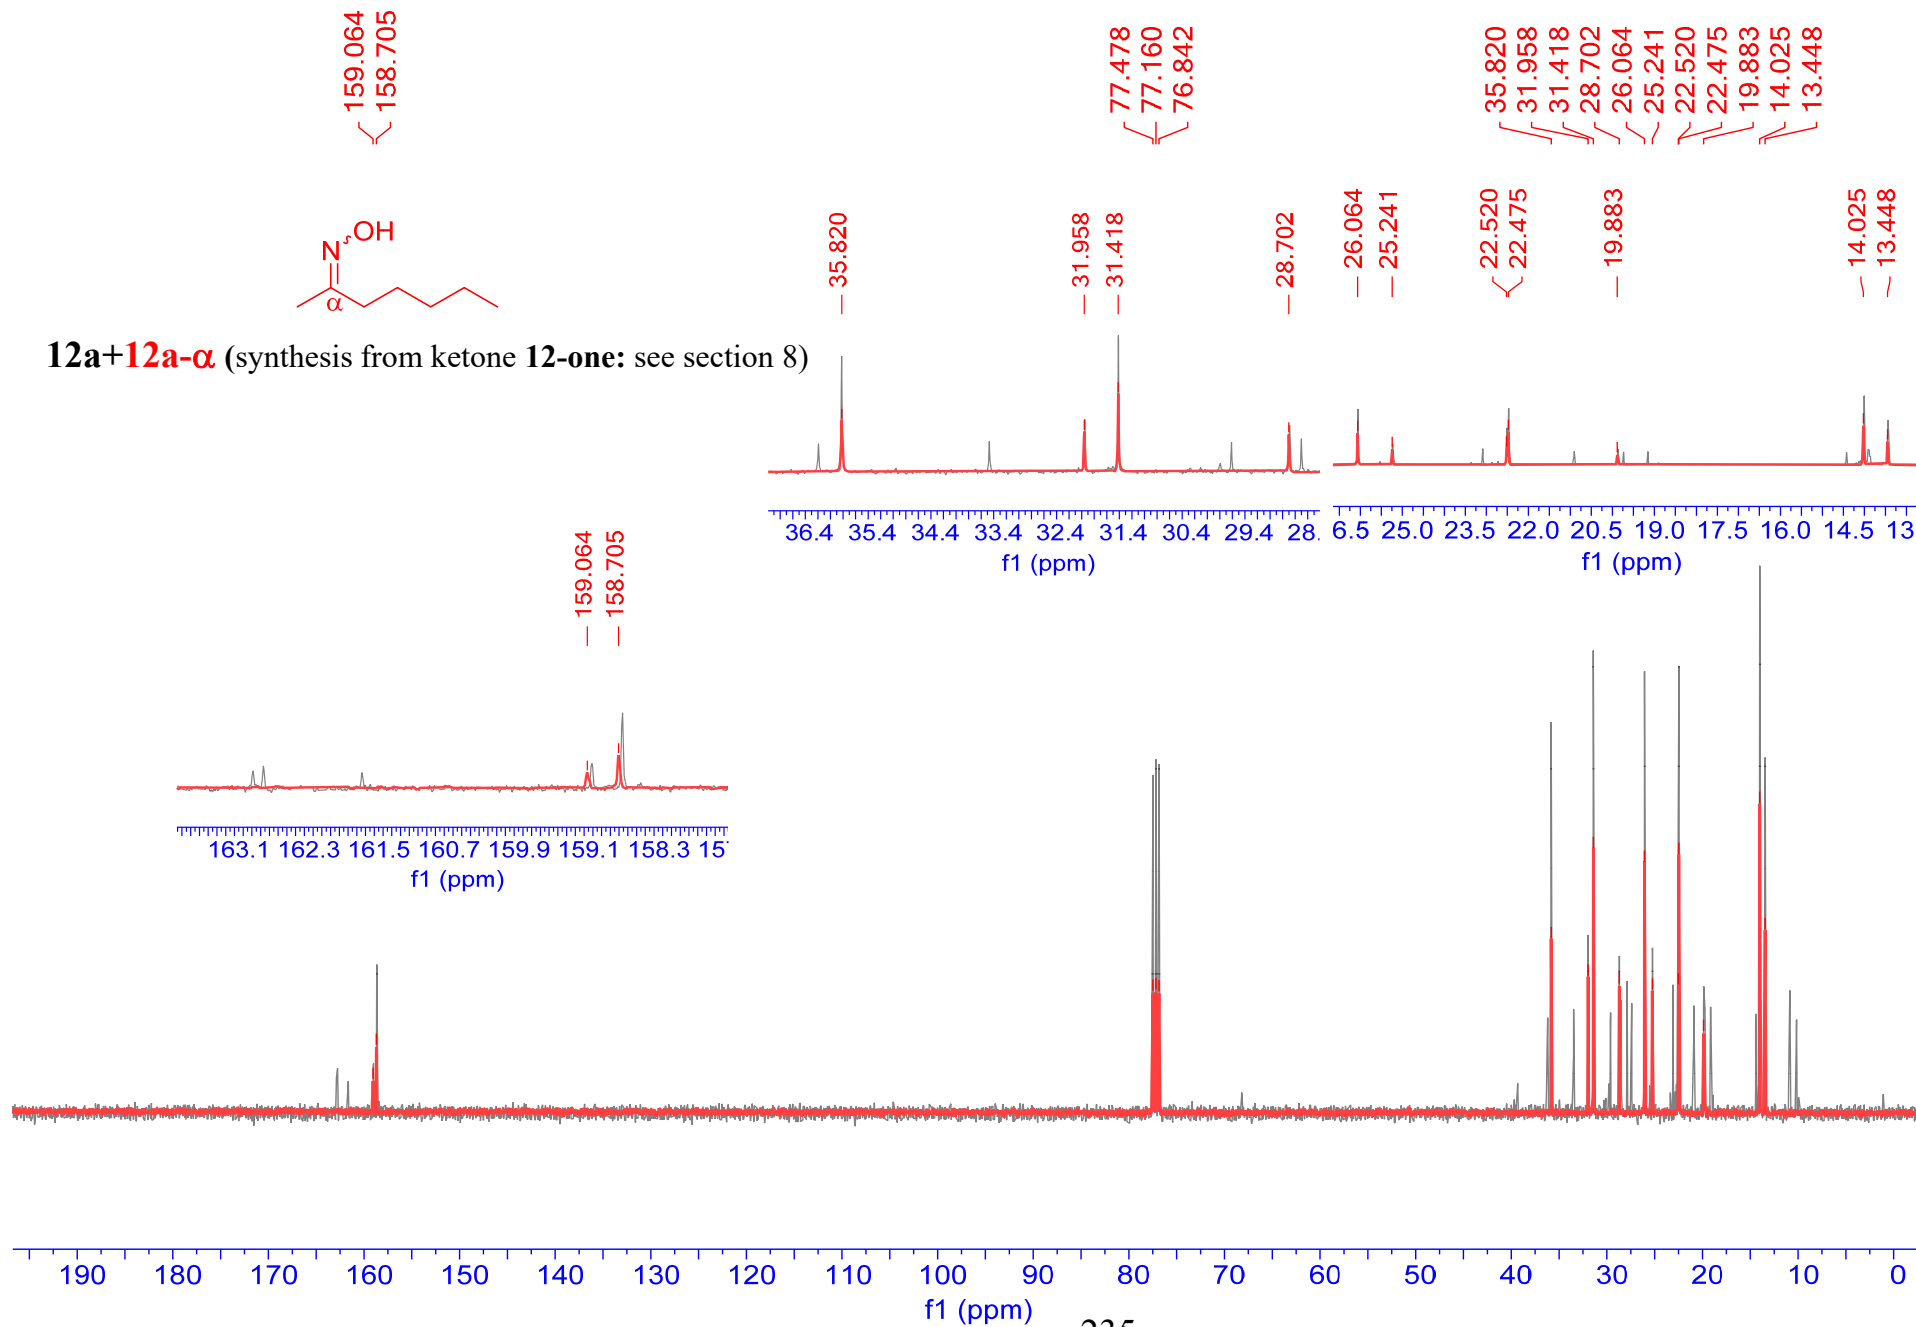

<sup>1</sup>H NMR, 400 MHz, CDCl<sub>3</sub>

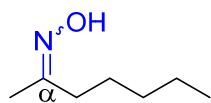

**12a (α-product)**  
*E/Z*=3:1

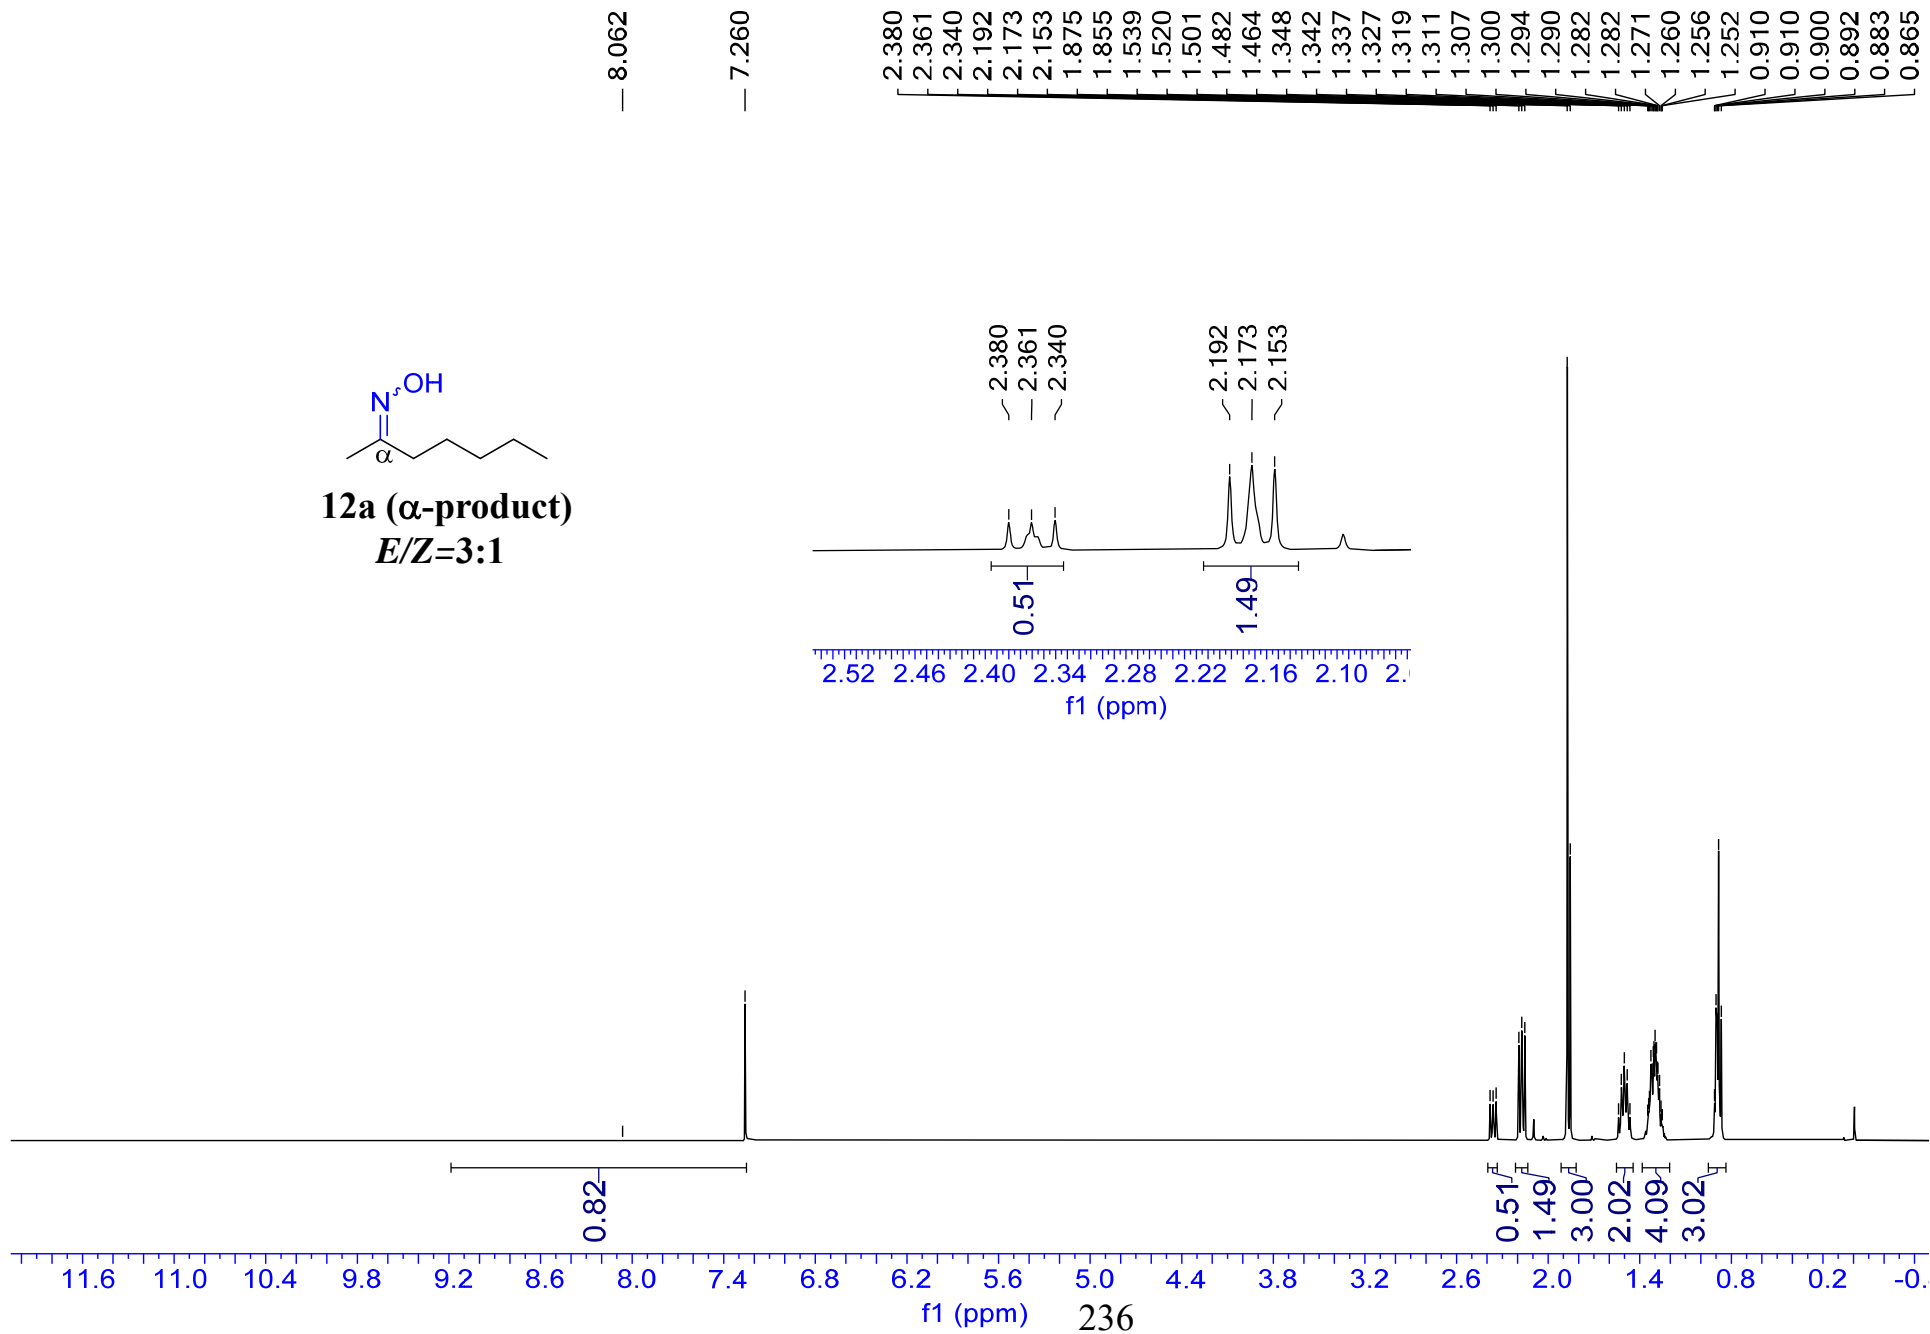



$^{13}\text{C}$  NMR 101 MHz,  $\text{CDCl}_3$

159.10  
158.75

77.48  
77.16  
76.84

35.85  
31.97  
31.43  
28.73  
26.04  
25.25  
22.54  
22.49  
19.91  
14.05  
13.51



**12a ( $\alpha$ -product)**  
*E/Z=3:1*

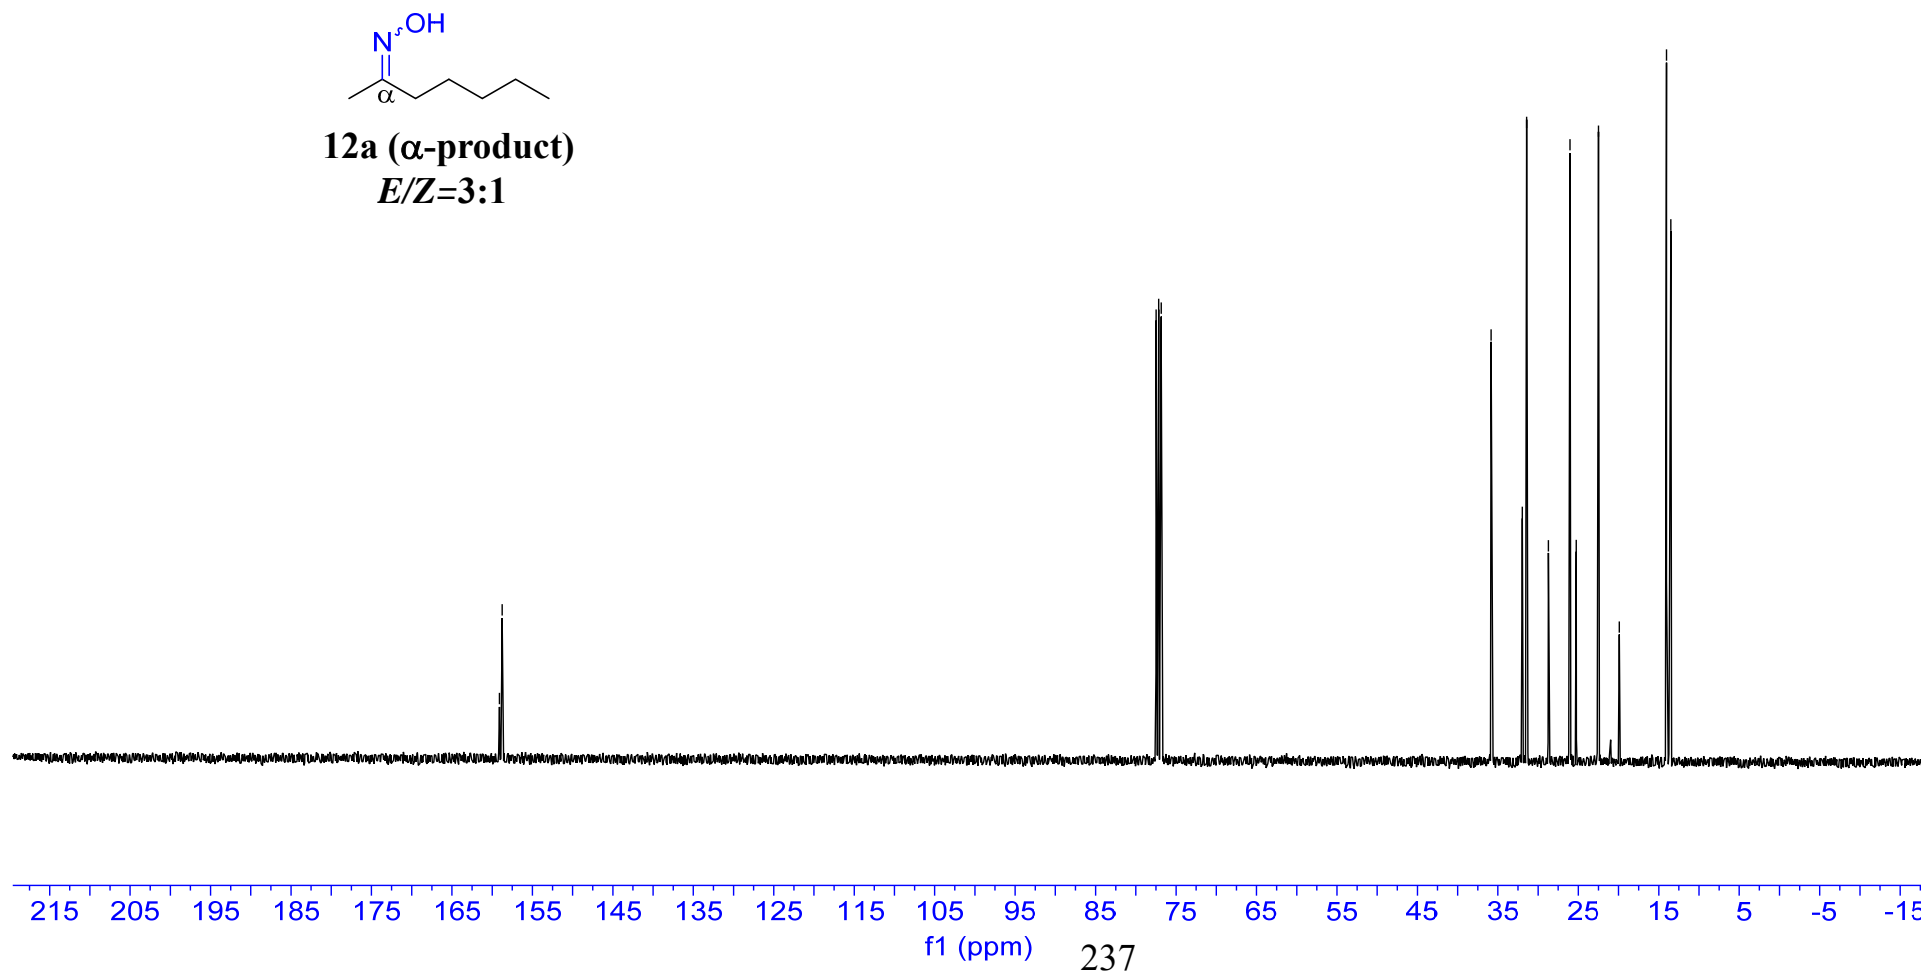

<sup>1</sup>H NMR, 400 MHz, CDCl<sub>3</sub>

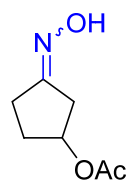

**13a**  
*E/Z*=1.6:1

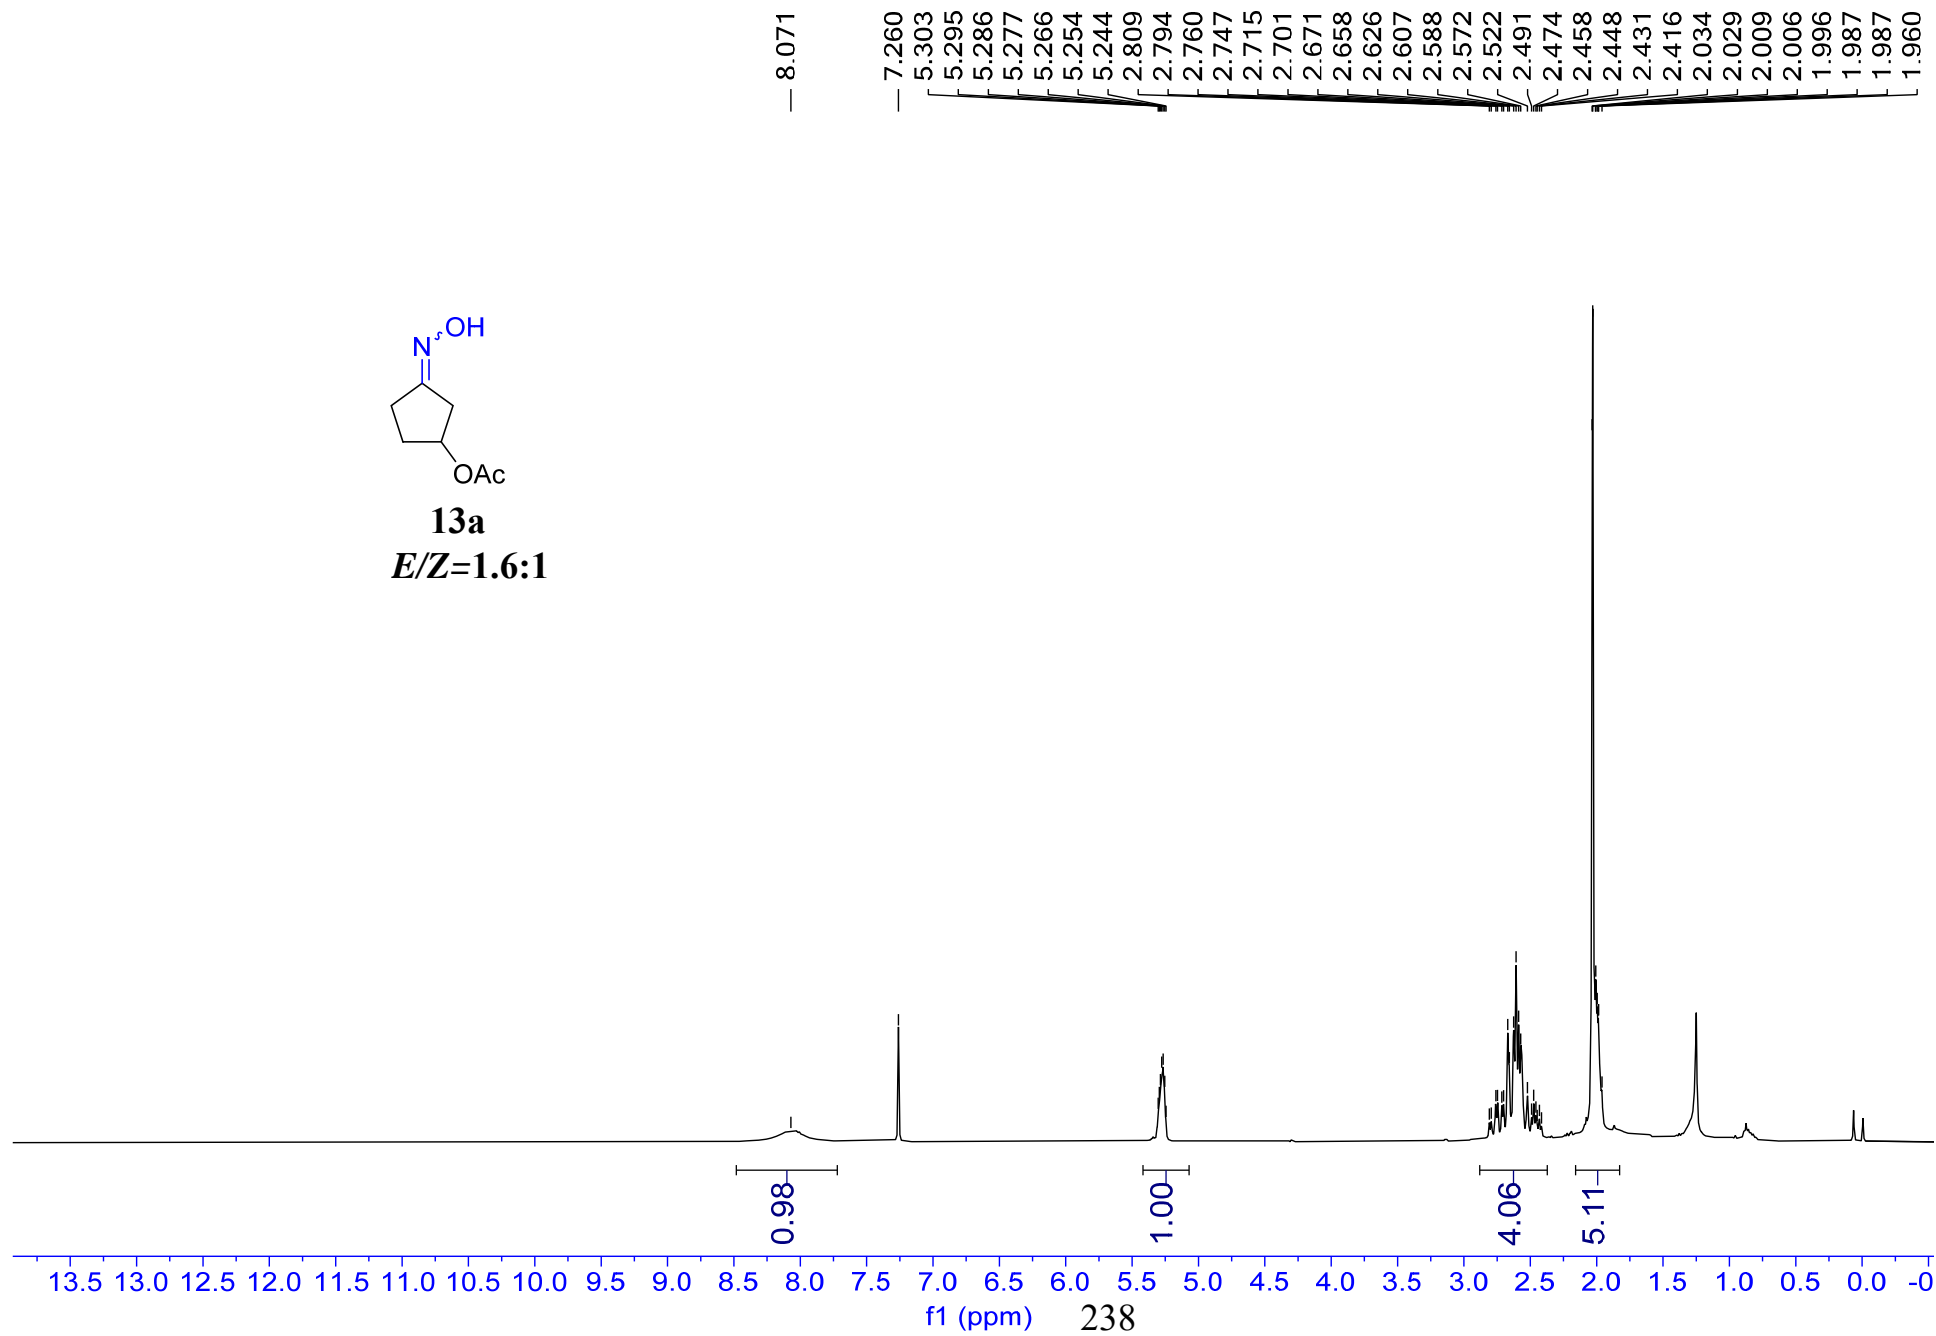

<sup>13</sup>C NMR 101 MHz, CDCl<sub>3</sub>

— 170.84  
— 164.03  
— 163.66

77.48  
77.16  
76.84  
74.04

37.23  
34.22  
30.95  
30.46  
29.96  
27.97  
24.77  
21.33



**13a**  
*E/Z*=1.6:1

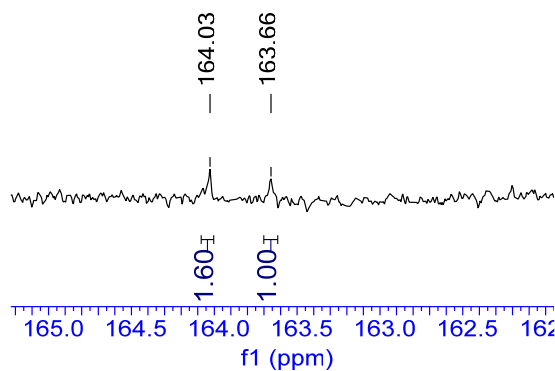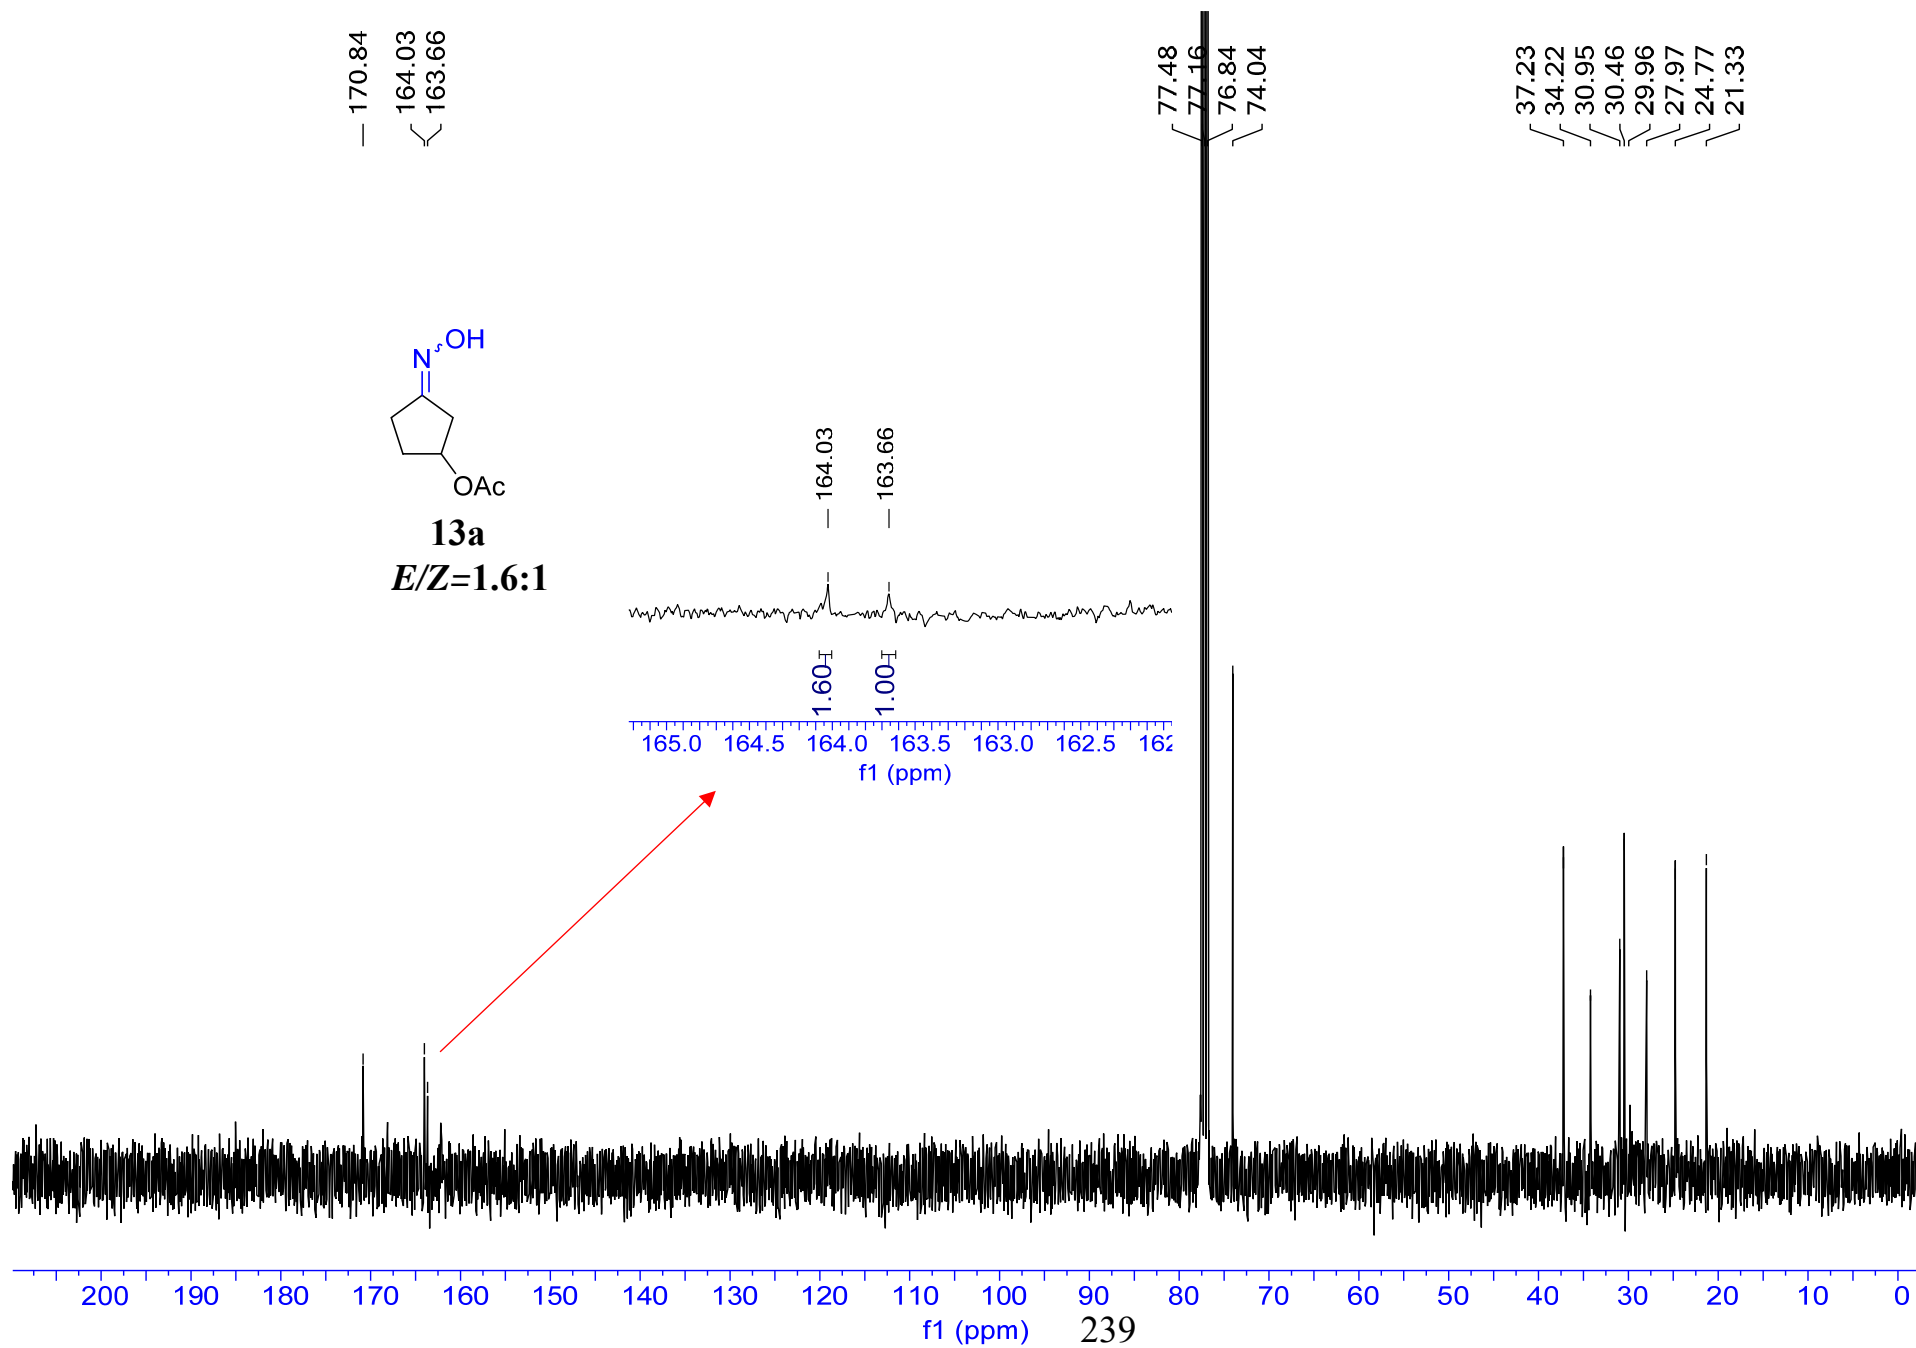

<sup>1</sup>H NMR, 400 MHz, CDCl<sub>3</sub>

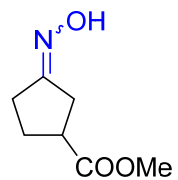

**14a**  
*E/Z*=1:1

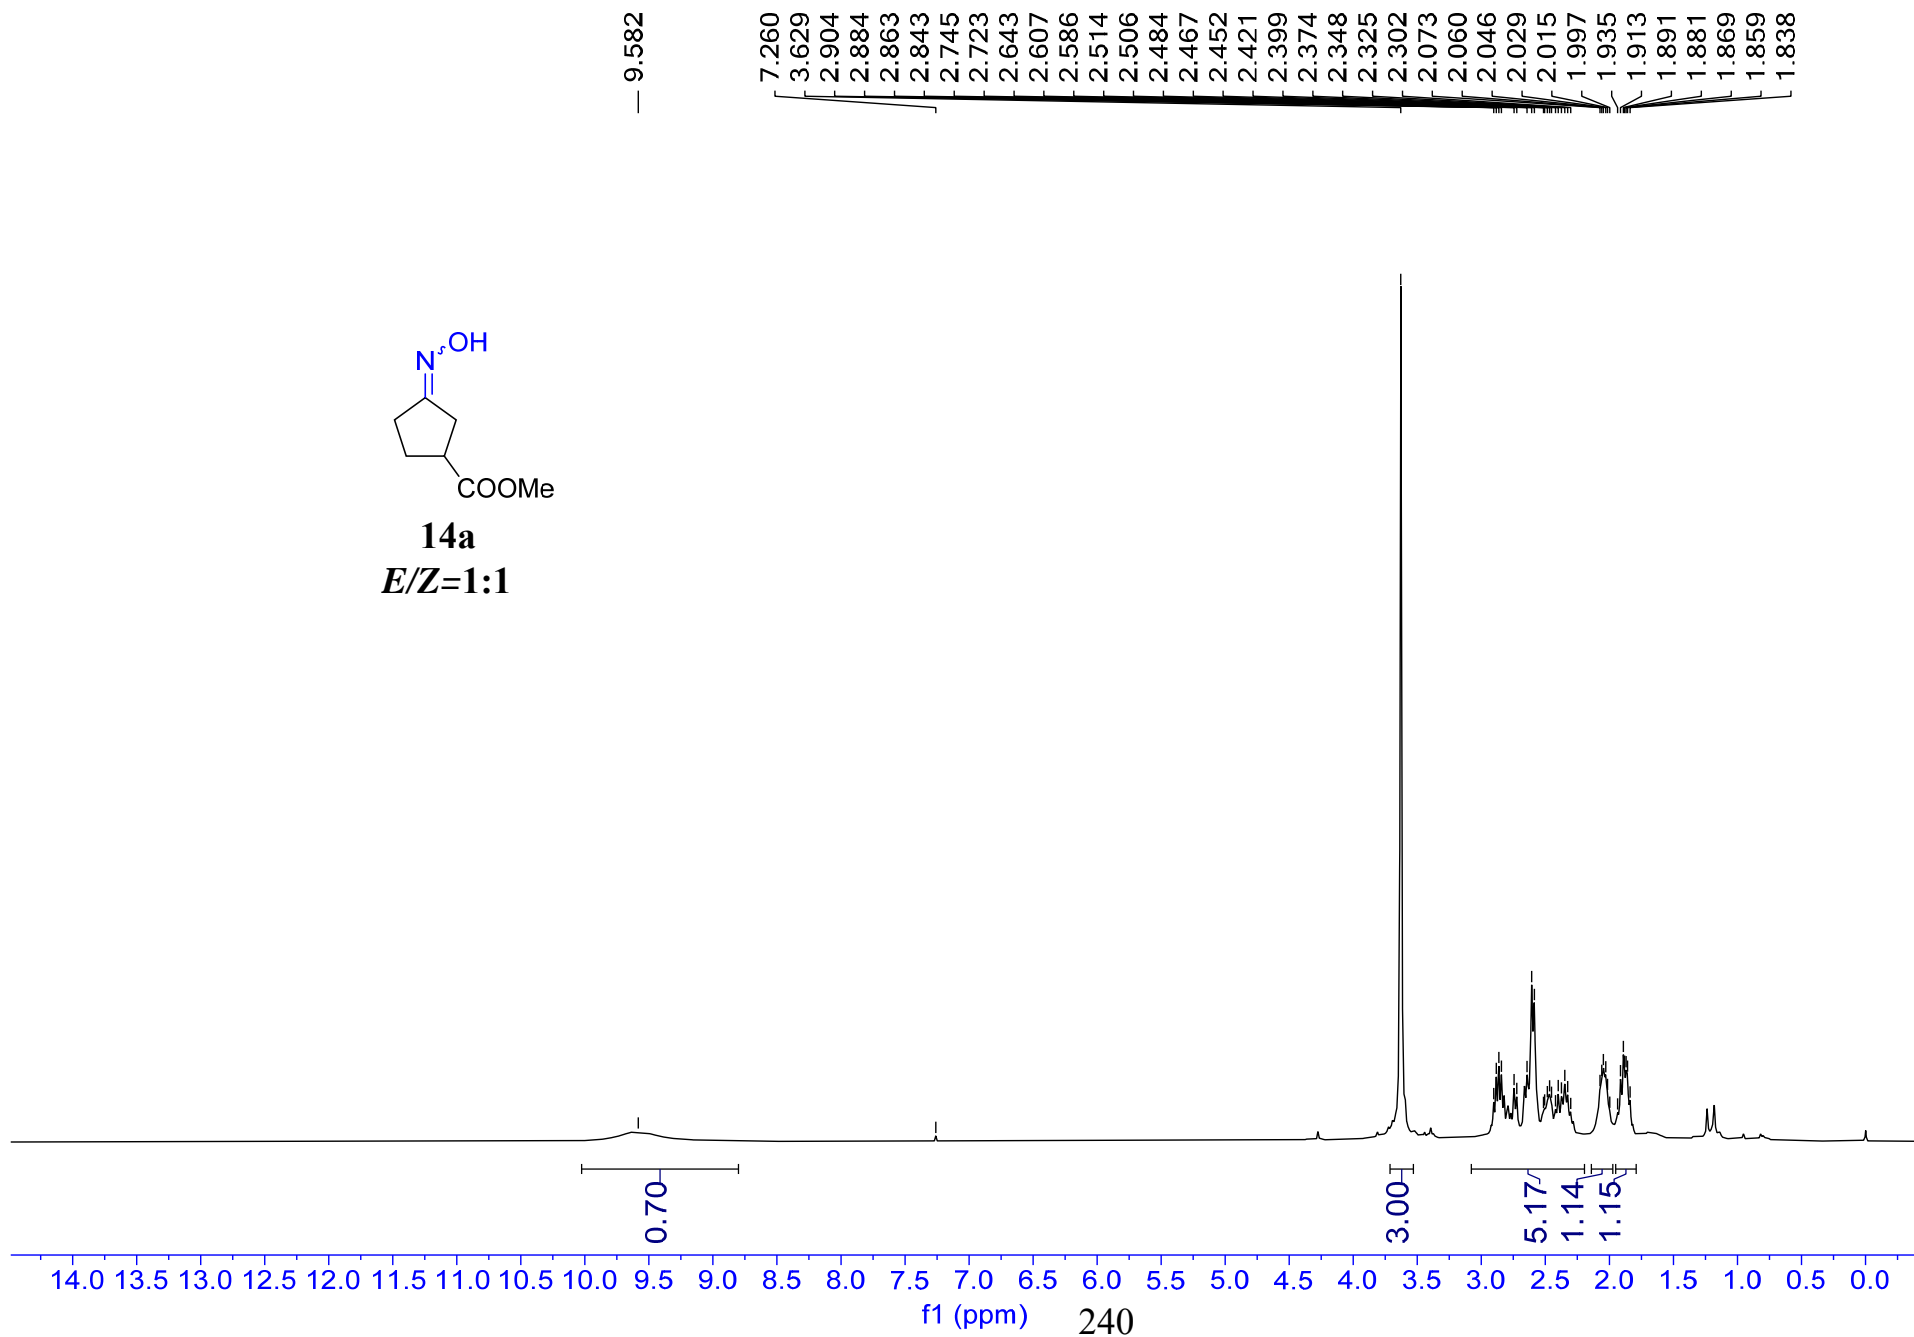

<sup>13</sup>C NMR 101 MHz, CDCl<sub>3</sub>

174.98  
174.77  
164.45  
164.28

77.48  
77.16  
76.84

51.94

42.53  
42.21  
33.78  
30.48  
29.82  
28.53  
27.96  
26.46

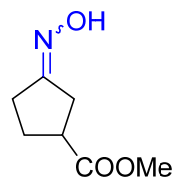

**14a**  
*E/Z*=1:1

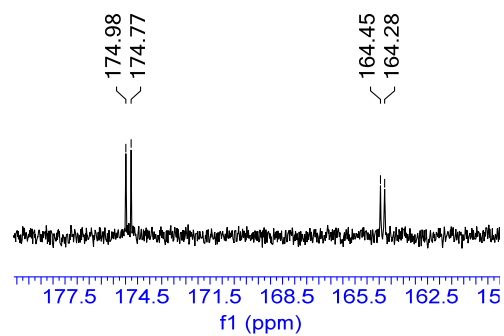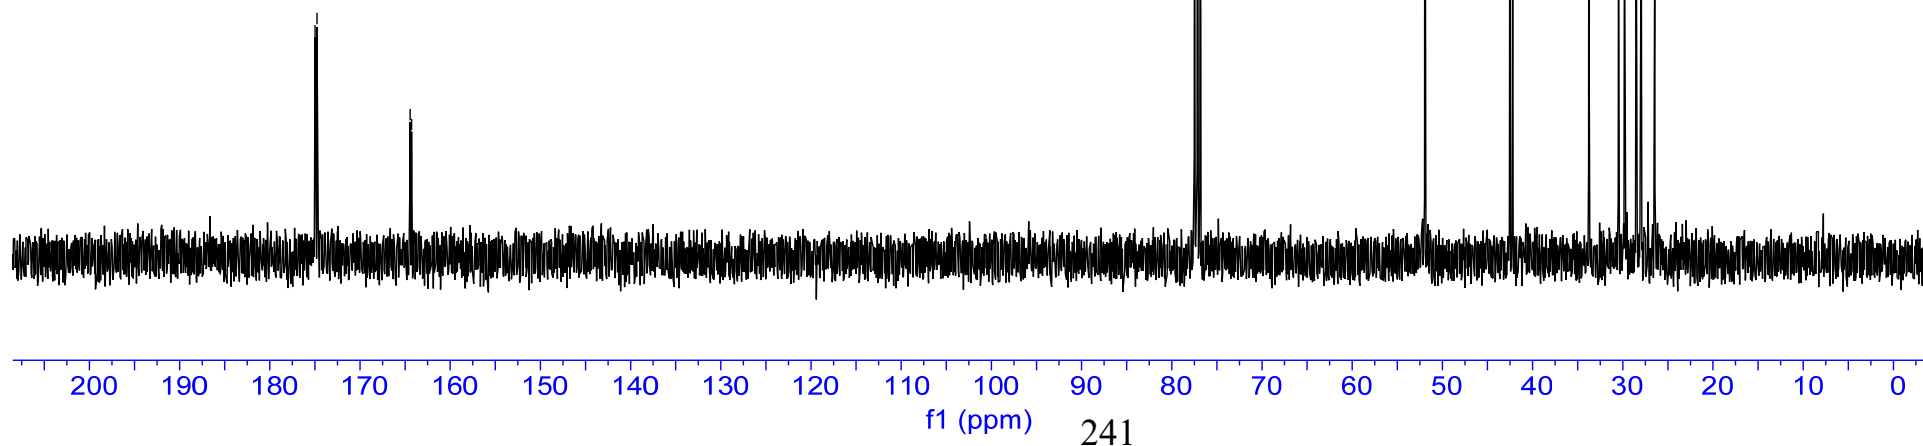

<sup>1</sup>H NMR, 400 MHz, CDCl<sub>3</sub>

8.995  
7.260  
3.660  
2.950  
2.913  
2.888  
2.850  
2.832  
2.804  
2.785  
2.742  
2.729  
2.702  
2.689  
2.625  
2.599  
2.585  
2.476  
2.455  
2.434  
2.413  
2.393  
2.376  
2.364  
2.346  
2.325  
2.314  
2.298  
2.067  
2.045  
2.021  
1.999  
1.938  
1.895  
1.847  
1.809  
1.780  
1.762  
1.686  
1.637  
1.614  
1.588  
1.547  
1.529  
1.496  
1.421  
1.407  
1.397  
1.388  
1.379  
1.365  
1.354  
1.339  
1.333  
1.307  
1.293  
1.230

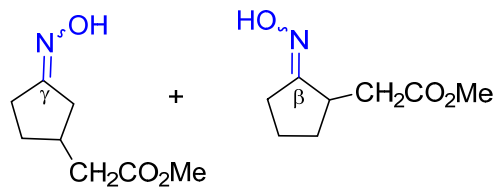

**15a**

$\beta:\gamma = 1:4$

$\gamma, E/Z=1:1$

$\beta, E/Z=3:1$

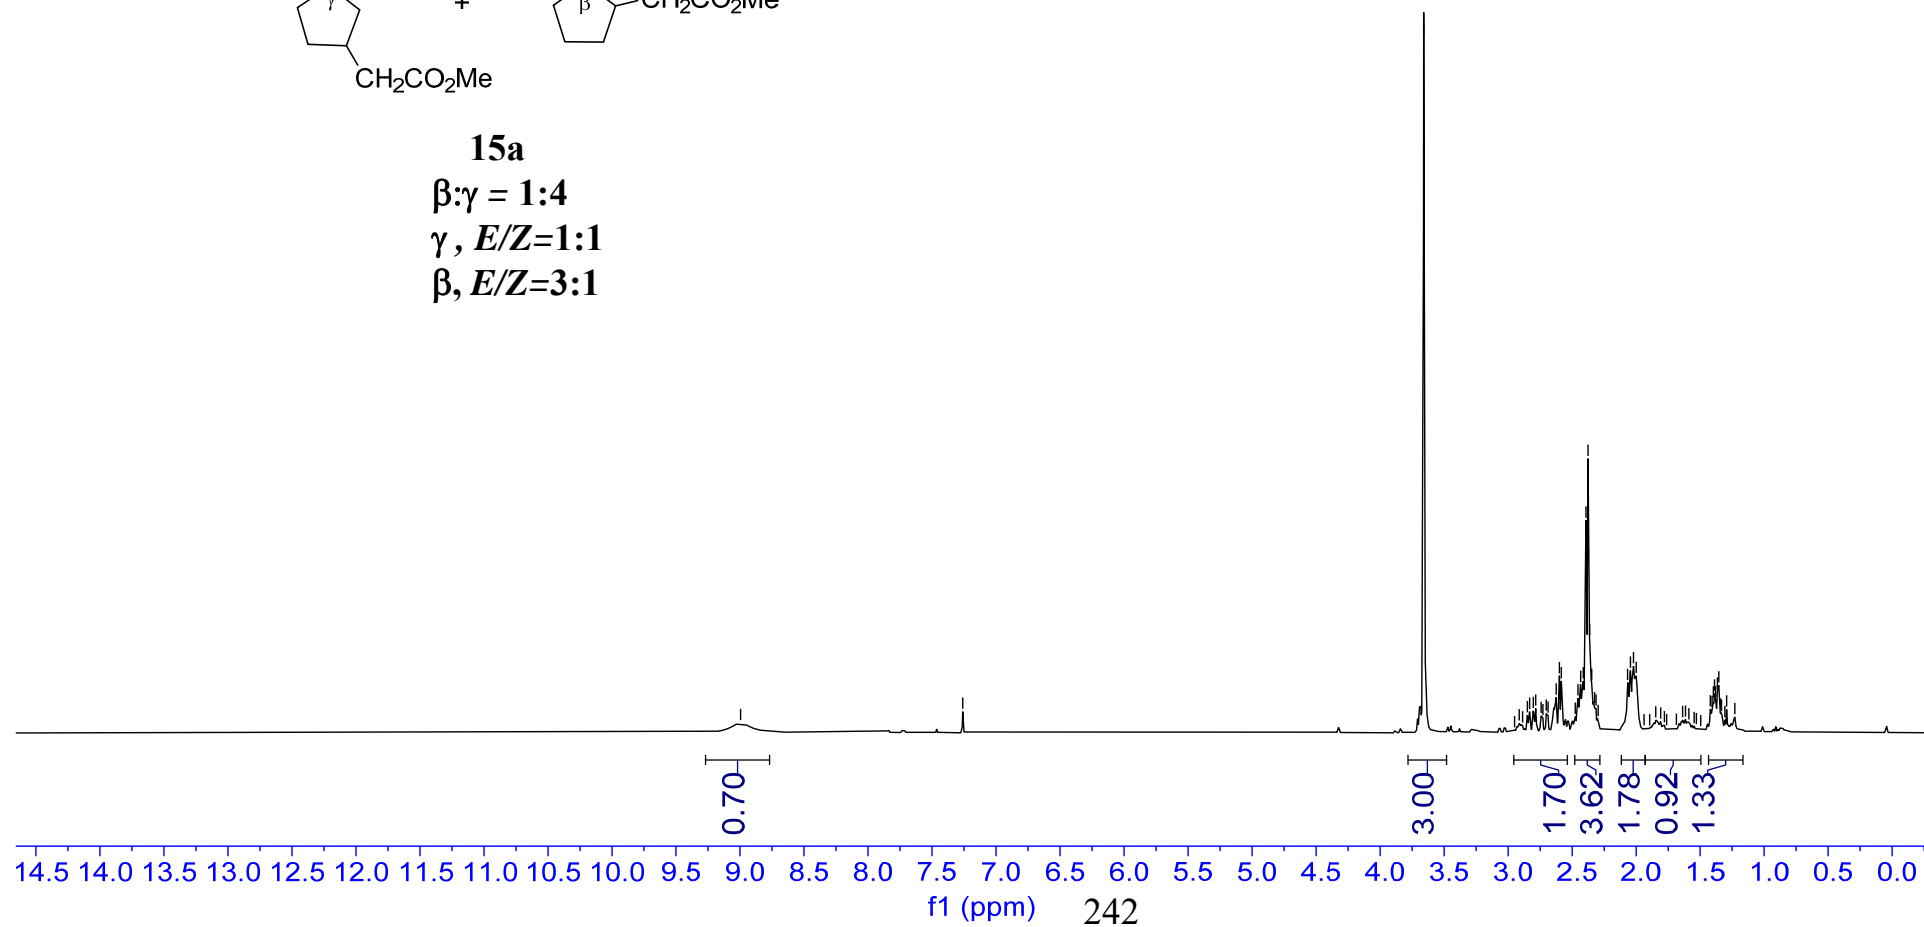

<sup>13</sup>C NMR 101 MHz, CDCl<sub>3</sub>

173.02  
172.98  
172.96  
167.42  
165.75  
165.59

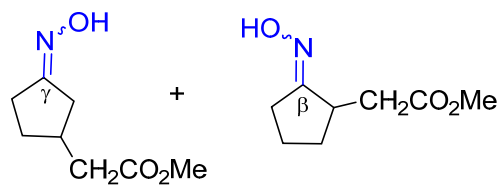

**15a**

$\beta:\gamma = 1:4$

$\gamma, E/Z=1:1$

$\beta, E/Z=3:1$

77.48  
77.16  
76.84

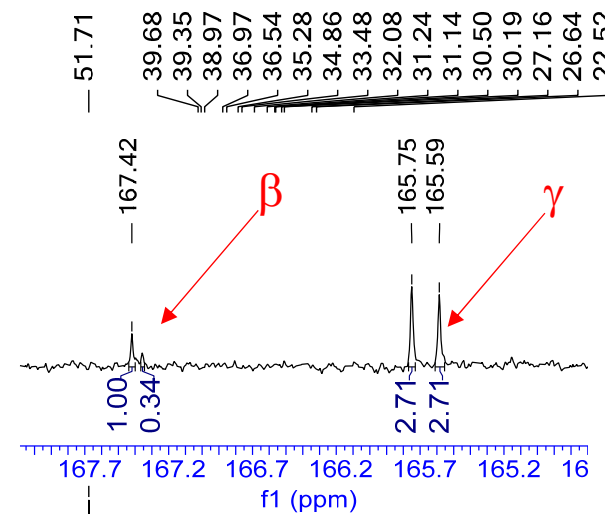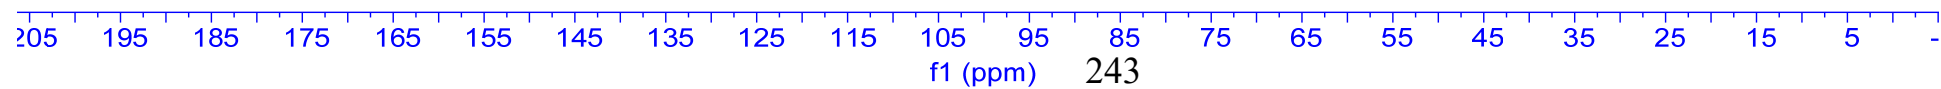

<sup>1</sup>H NMR, 400 MHz, CDCl<sub>3</sub>

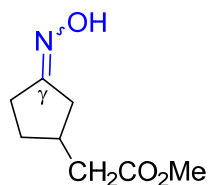

**15a (γ-product)**  
***E/Z*=1:1**

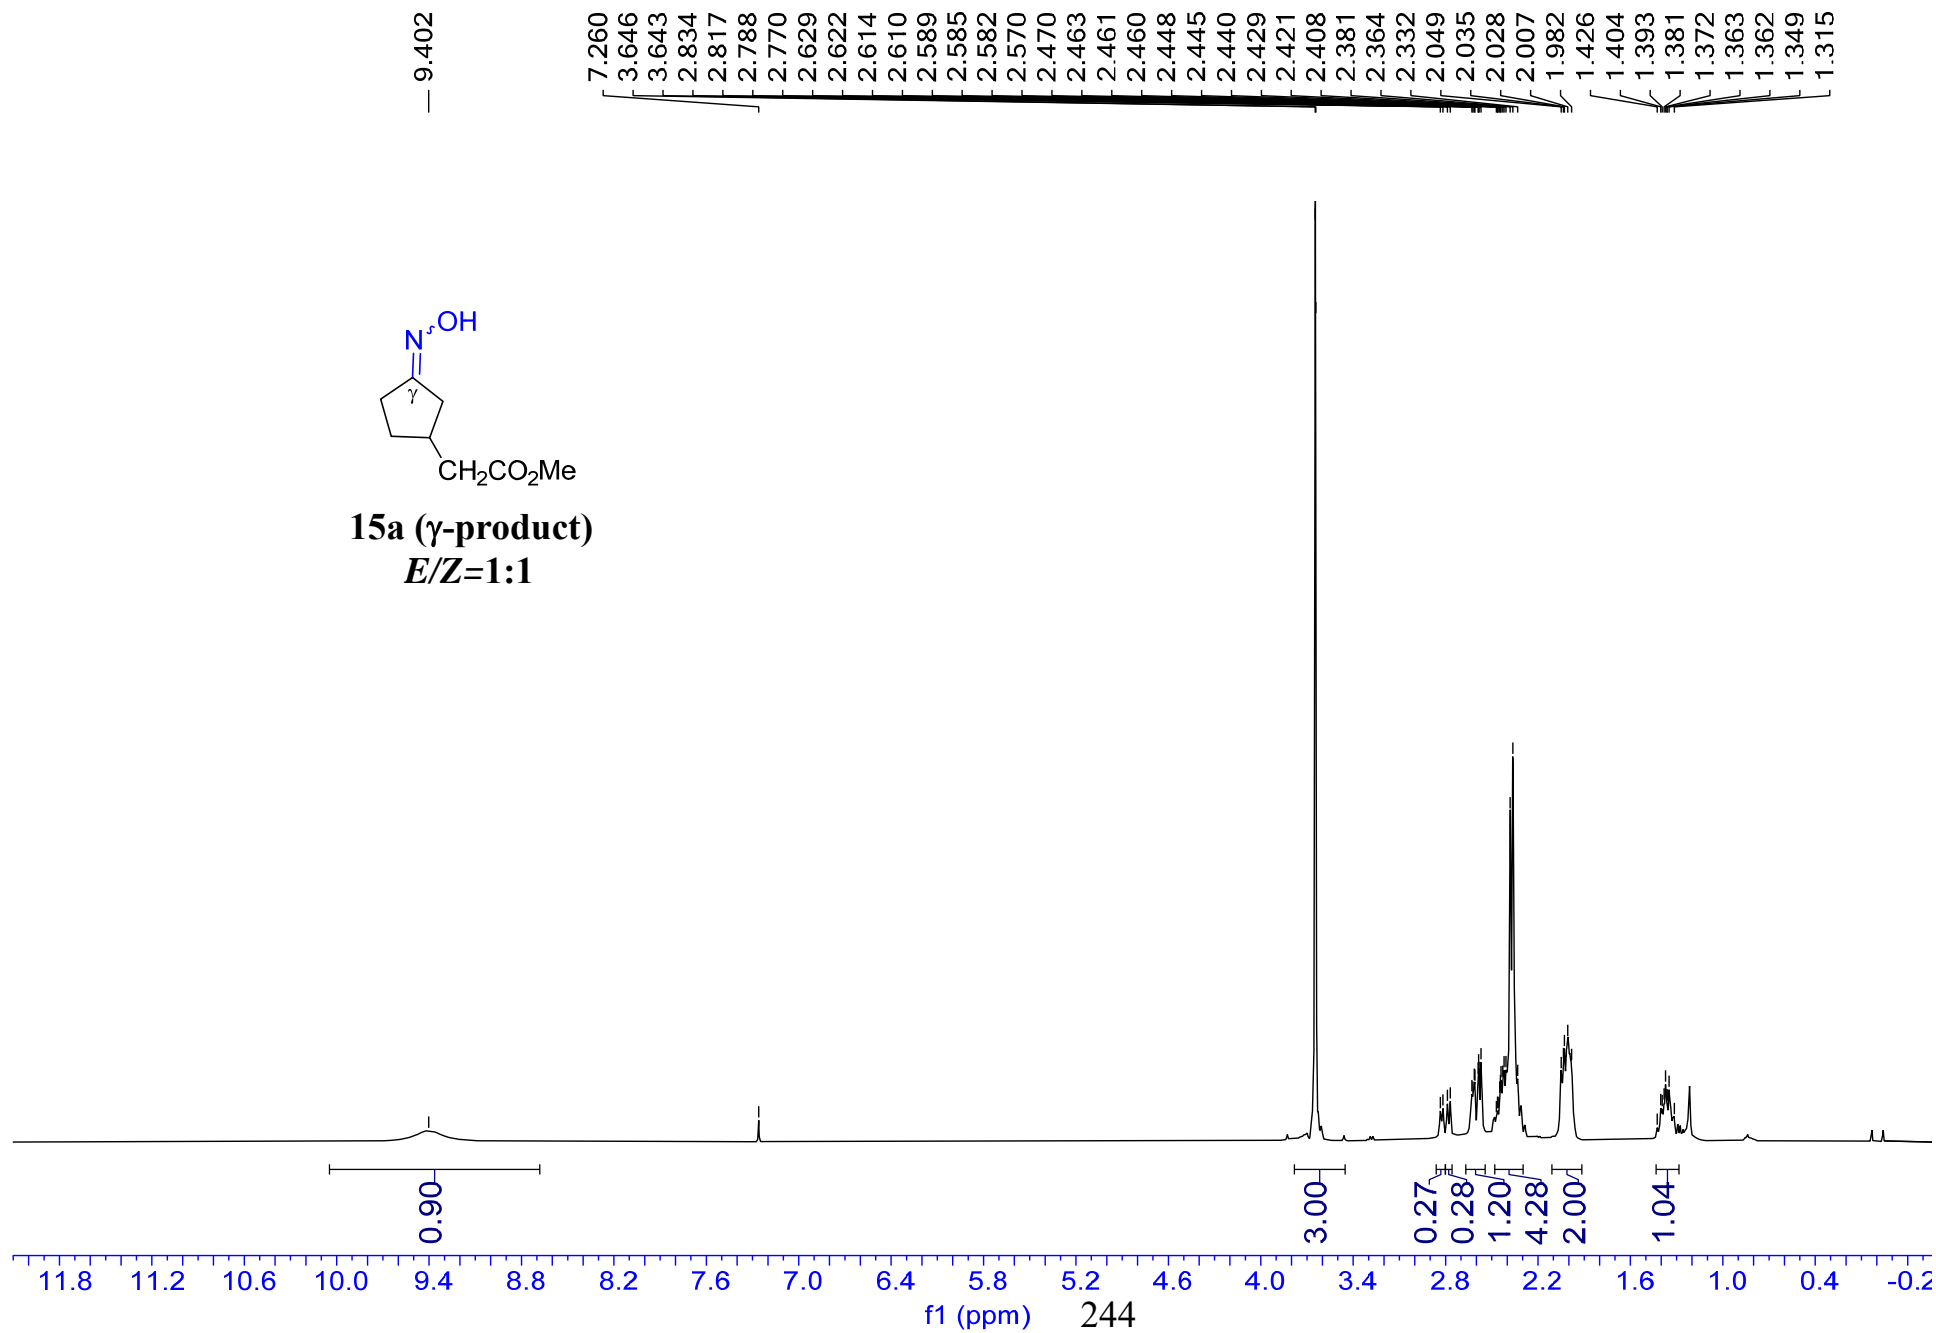



$^{13}\text{C}$  NMR 101 MHz,  $\text{CDCl}_3$

173.00  
172.99  
165.72  
165.55

77.48  
77.16  
76.84

51.70  
39.31  
38.92  
36.90  
35.24  
34.80  
33.47  
31.09  
30.45  
30.13  
26.65

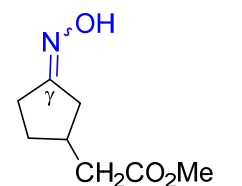

173.00  
172.99

165.72  
165.55

0.94  
0.93

180.5 177.0 173.5 170.0 166.5 163.0 159.5 151  
f1 (ppm)

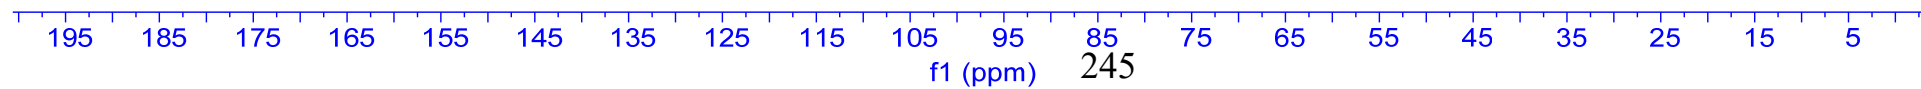

<sup>1</sup>H NMR, 400 MHz, CDCl<sub>3</sub>

9.130  
7.260  
5.008  
4.998  
4.988  
4.979  
4.969  
4.959  
4.946  
4.936  
2.890  
2.879  
2.854  
2.843  
2.784  
2.771  
2.749  
2.731  
2.715  
2.615  
2.597  
2.580  
2.535  
2.535  
2.500  
2.460  
2.438  
2.424  
2.401  
2.388  
2.247  
2.230  
2.223  
2.223  
2.223  
2.200  
2.050  
2.022  
2.022  
1.917  
1.907  
1.896  
1.887  
1.874  
1.864  
1.797  
1.783  
1.776  
1.762  
1.754  
1.741  
1.732  
1.722  
1.702  
1.609  
1.600  
1.587  
1.576  
1.564  
1.554  
1.542

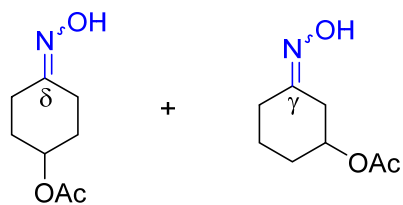

**16a**

$\gamma:\delta=1.5:1$

$\gamma, E/Z=1:1$

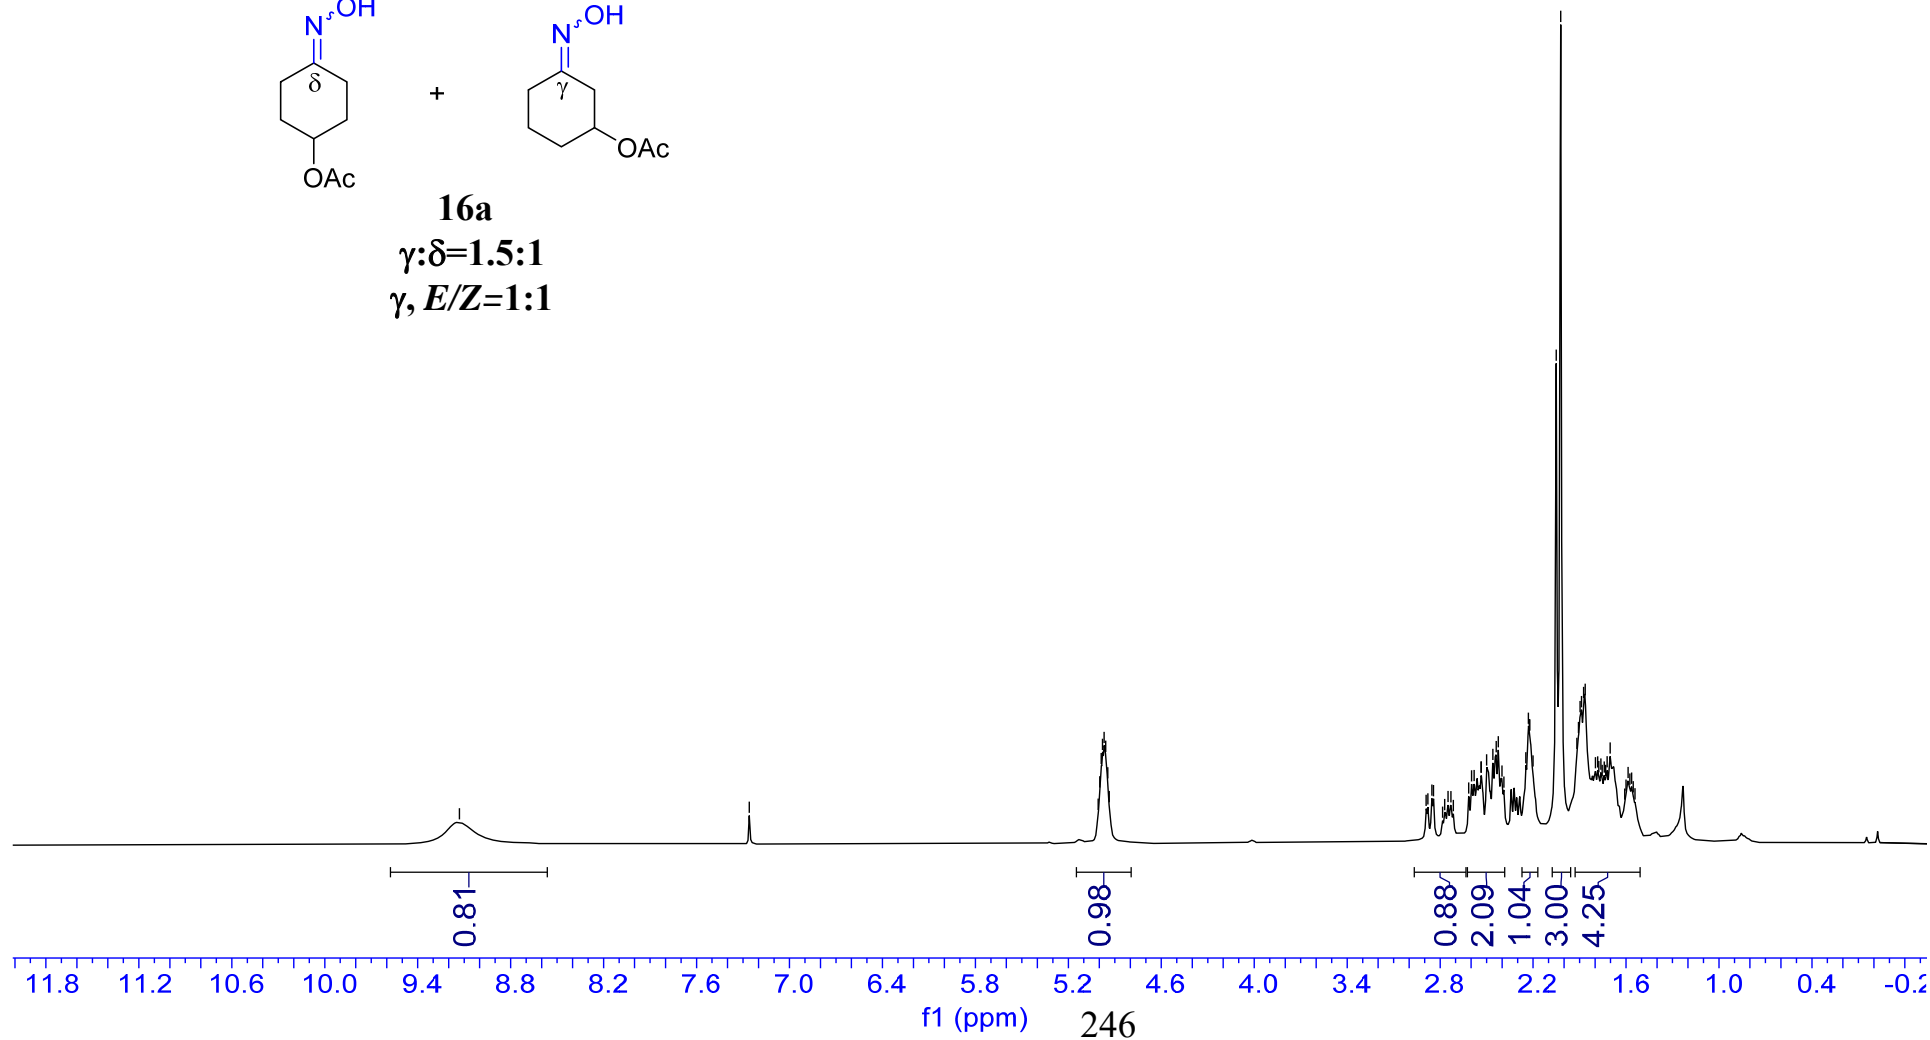

$^{13}\text{C}$  NMR 101 MHz,  $\text{CDCl}_3$

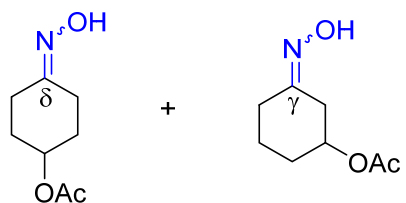

**16a**

$\gamma:\delta=1.5:1$

$\gamma, E/Z=1:1$

170.70  
170.48  
158.44  
157.37  
156.89

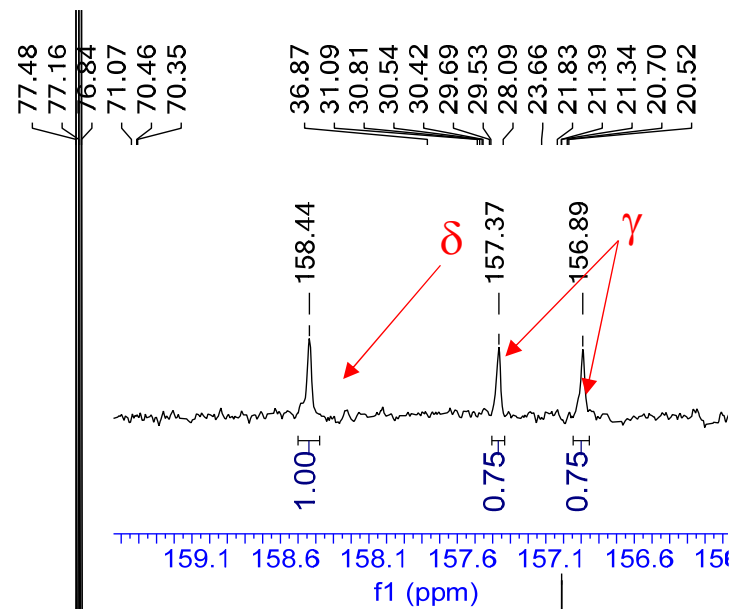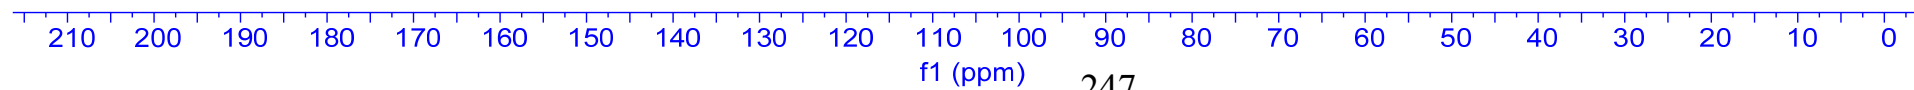

$^1\text{H}$  NMR, 400 MHz,  $\text{CDCl}_3$

7.260  
2.795  
2.782  
2.775  
2.761  
2.757  
2.744  
2.737  
2.724  
2.510  
2.497  
2.489  
2.474  
2.465  
2.459  
2.452  
2.446  
2.438  
2.432  
2.429  
2.417  
2.409  
2.397  
2.267  
2.255  
2.246  
2.233  
2.219  
2.210  
2.198  
2.058  
1.953  
1.950  
1.941  
1.938  
1.932  
1.929  
1.920  
1.916  
1.910  
1.900  
1.896  
1.890  
1.887  
1.878  
1.871  
1.867  
1.829  
1.816  
1.809  
1.796  
1.788  
1.775  
1.766  
1.754  
1.745  
1.741  
1.734  
1.721  
1.714

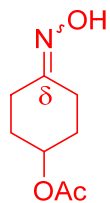

**16a+16a- $\delta$**  (synthesis from ketone **16-one**: see section 8)

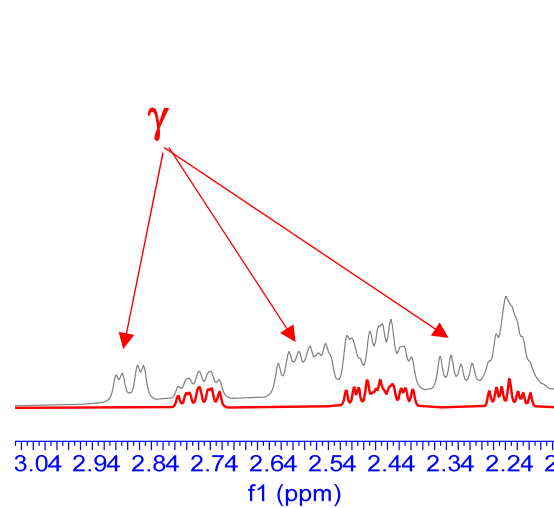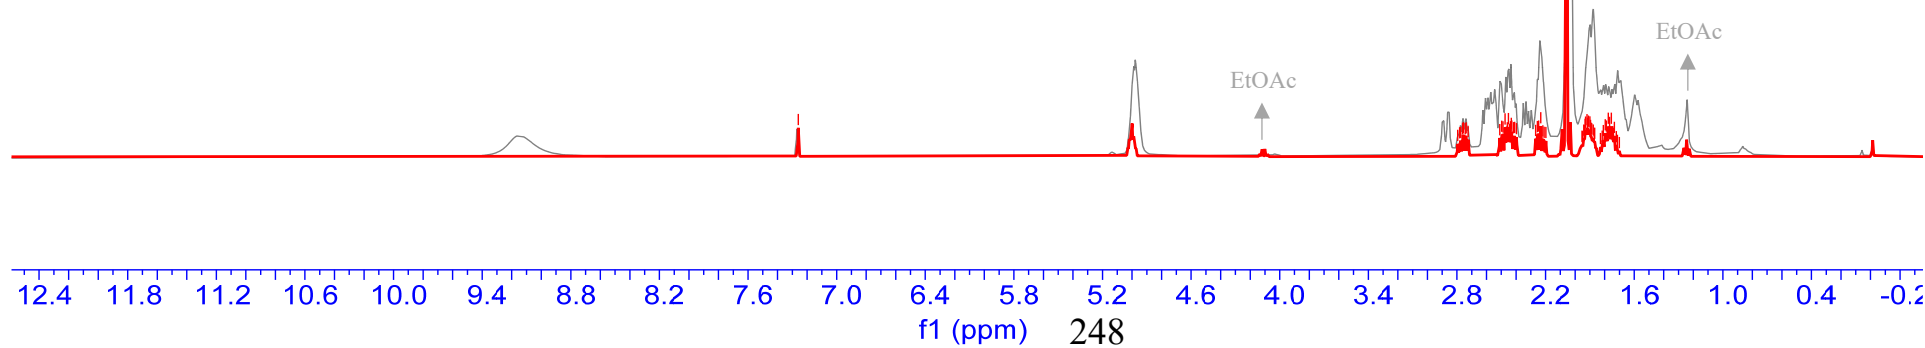

$^{13}\text{C}$  NMR 101 MHz,  $\text{CDCl}_3$

— 170.67 — 158.52

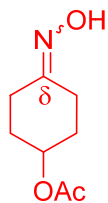

77.48  
77.16  
76.84  
70.34

30.86  
29.58  
28.15  
21.41  
20.54

**16a+16a- $\delta$**  (synthesis from ketone **16-one**: see section 8)

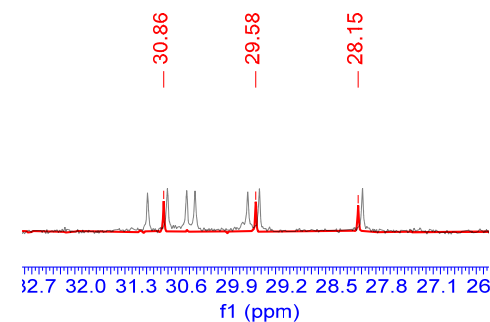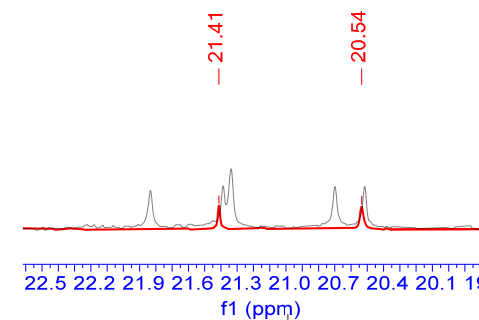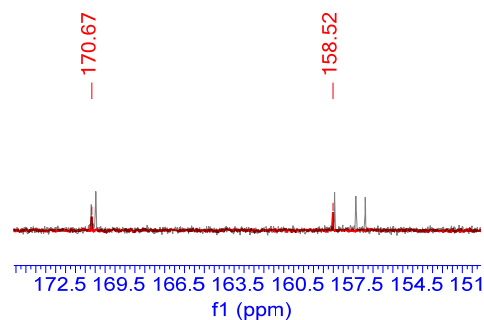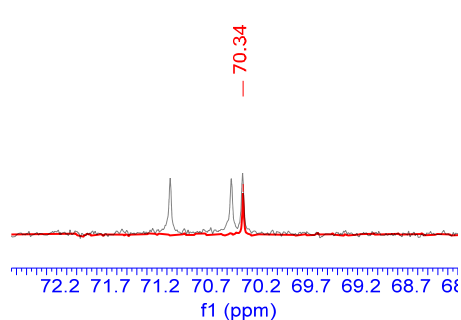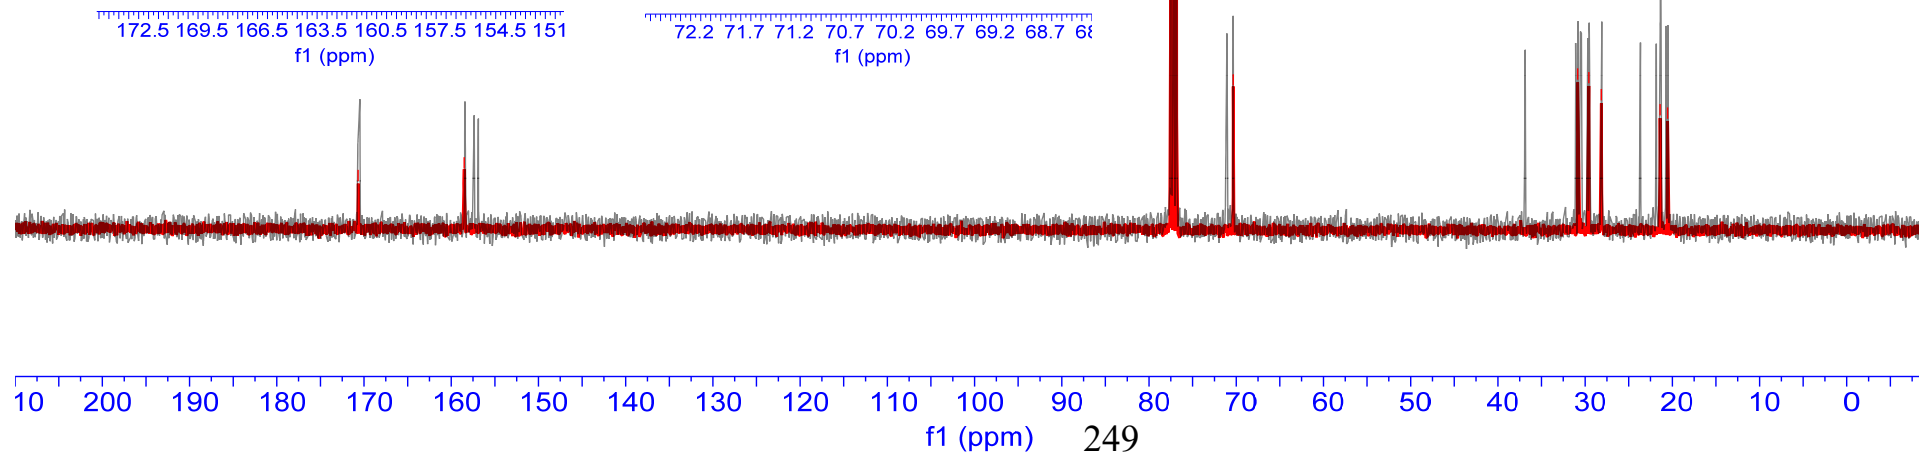

$^1\text{H}$  NMR, 400 MHz,  $\text{CDCl}_3$

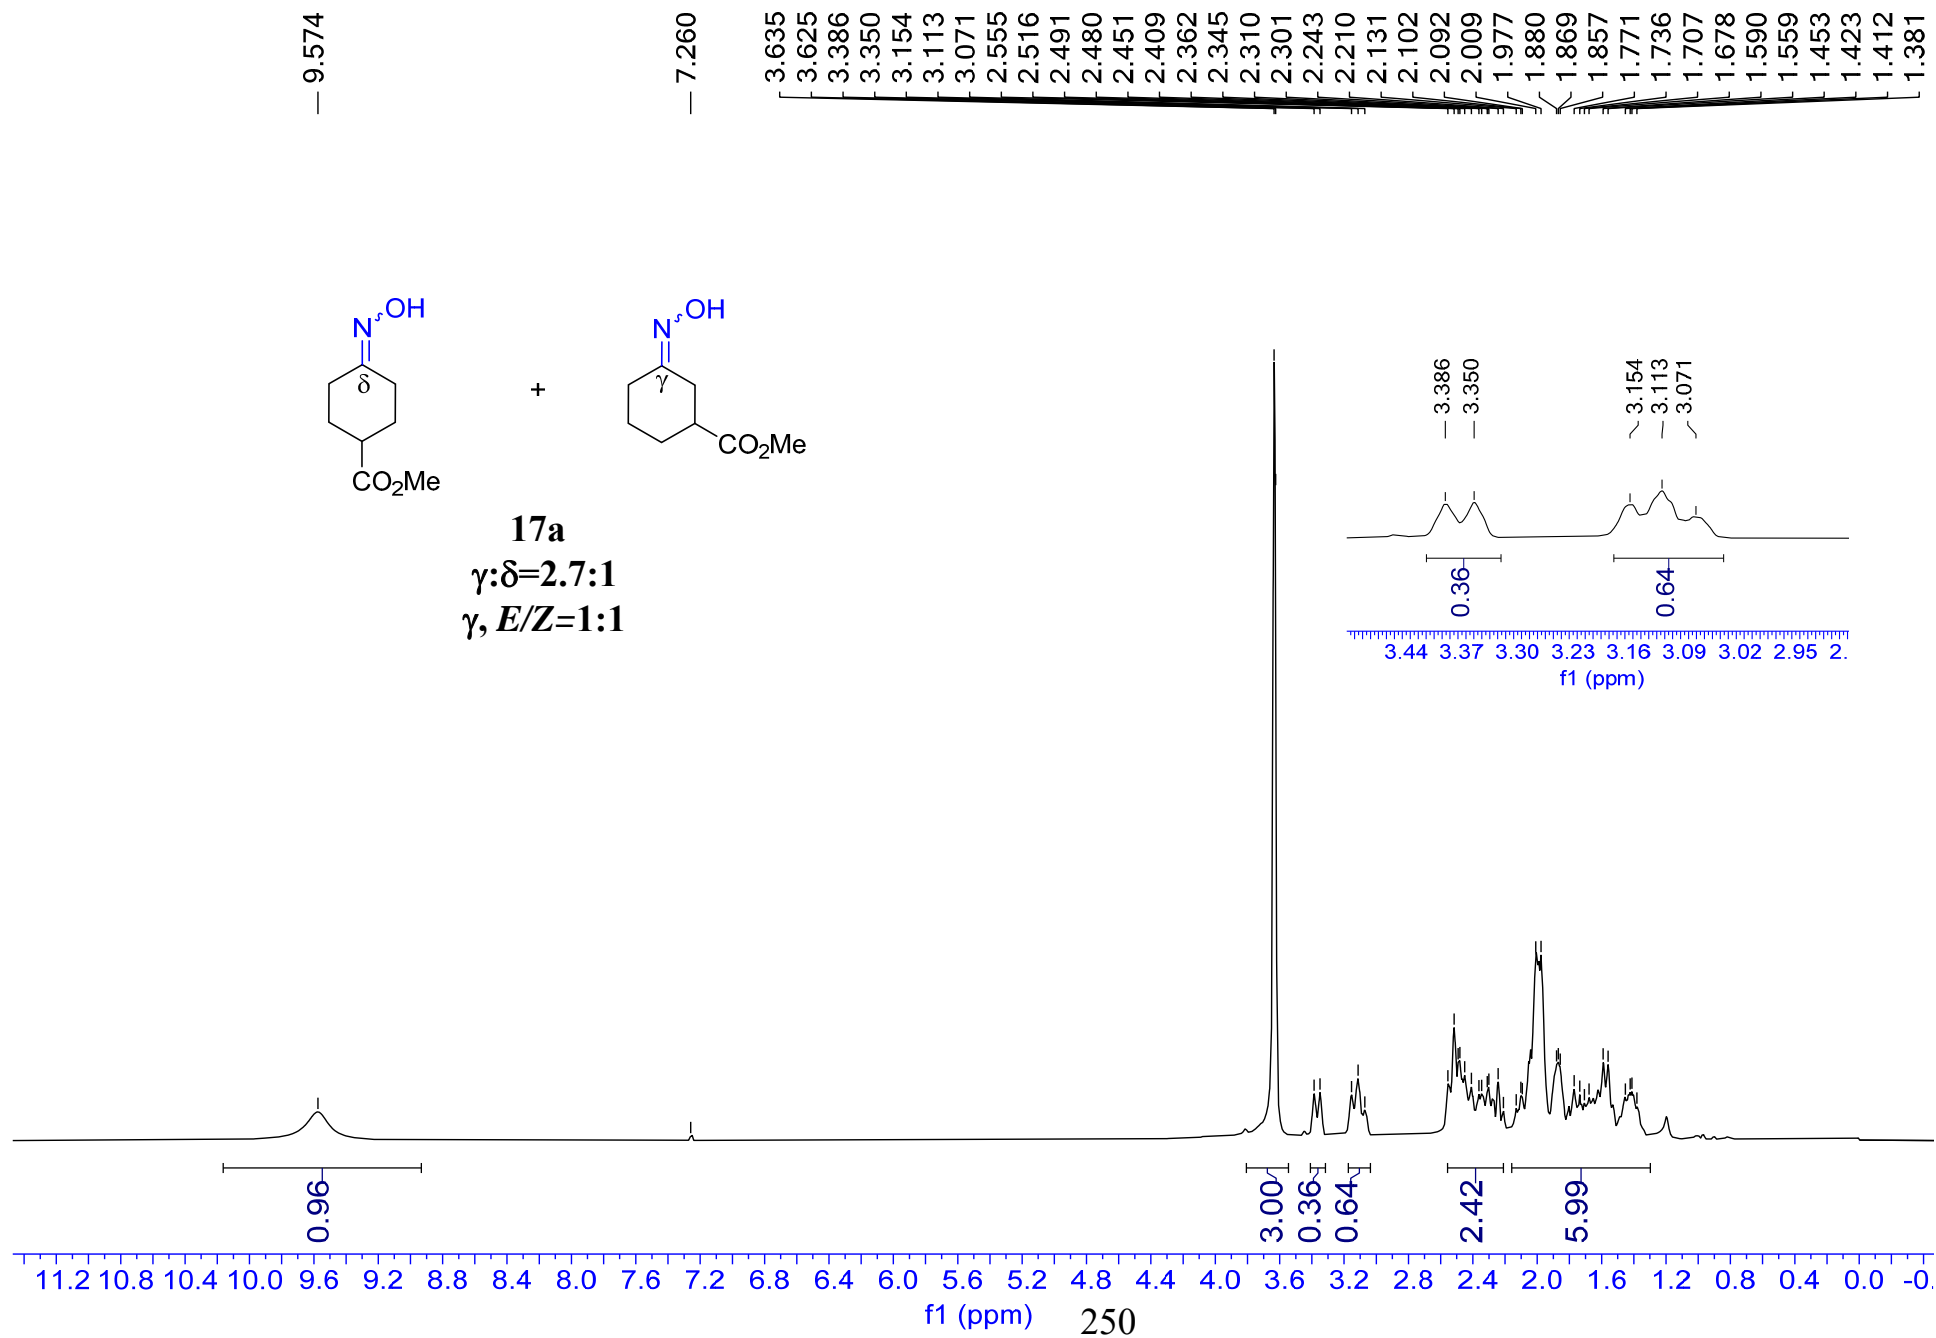

$^{13}\text{C}$  NMR 101 MHz,  $\text{CDCl}_3$

175.19  
174.98  
174.85

158.69  
158.41  
158.04

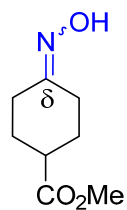

+

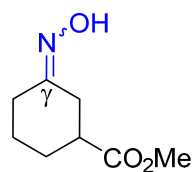

**17a**  
 $\gamma:\delta=2.7:1$   
 $\gamma, E/Z=1:1$

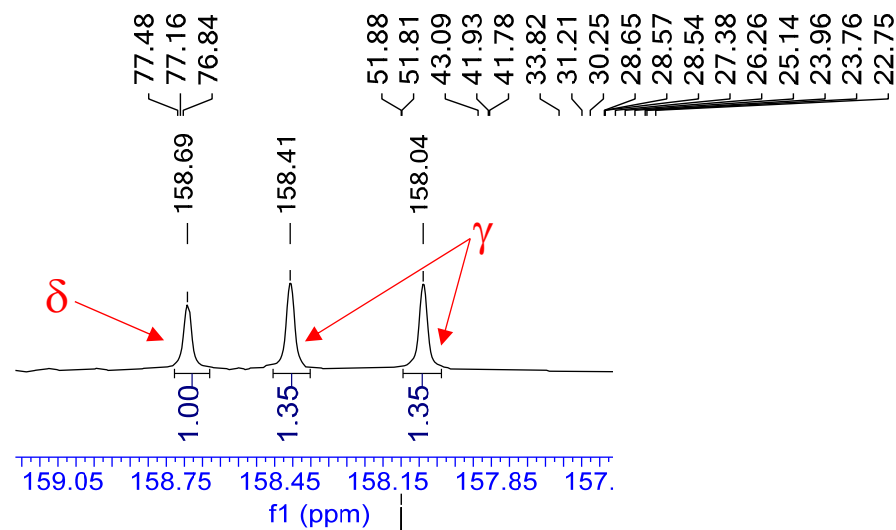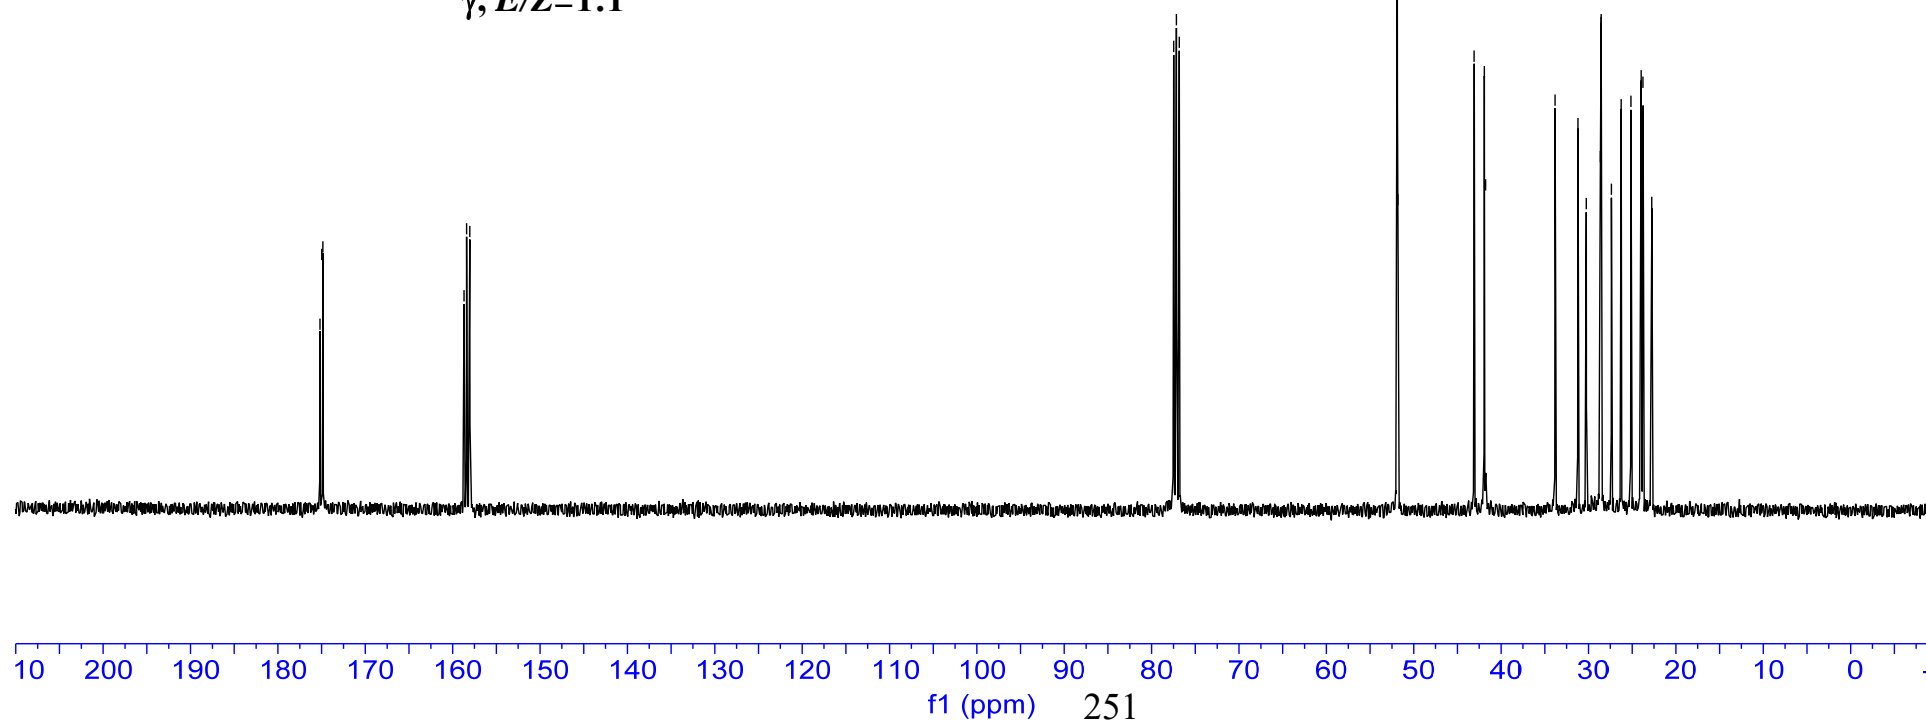

$^1\text{H}$  NMR, 400 MHz,  $\text{CDCl}_3$

— 7.878

— 7.260

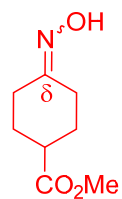

**17a**+**17a- $\delta$**  (synthesis from ketone **17-one**: see section 8)

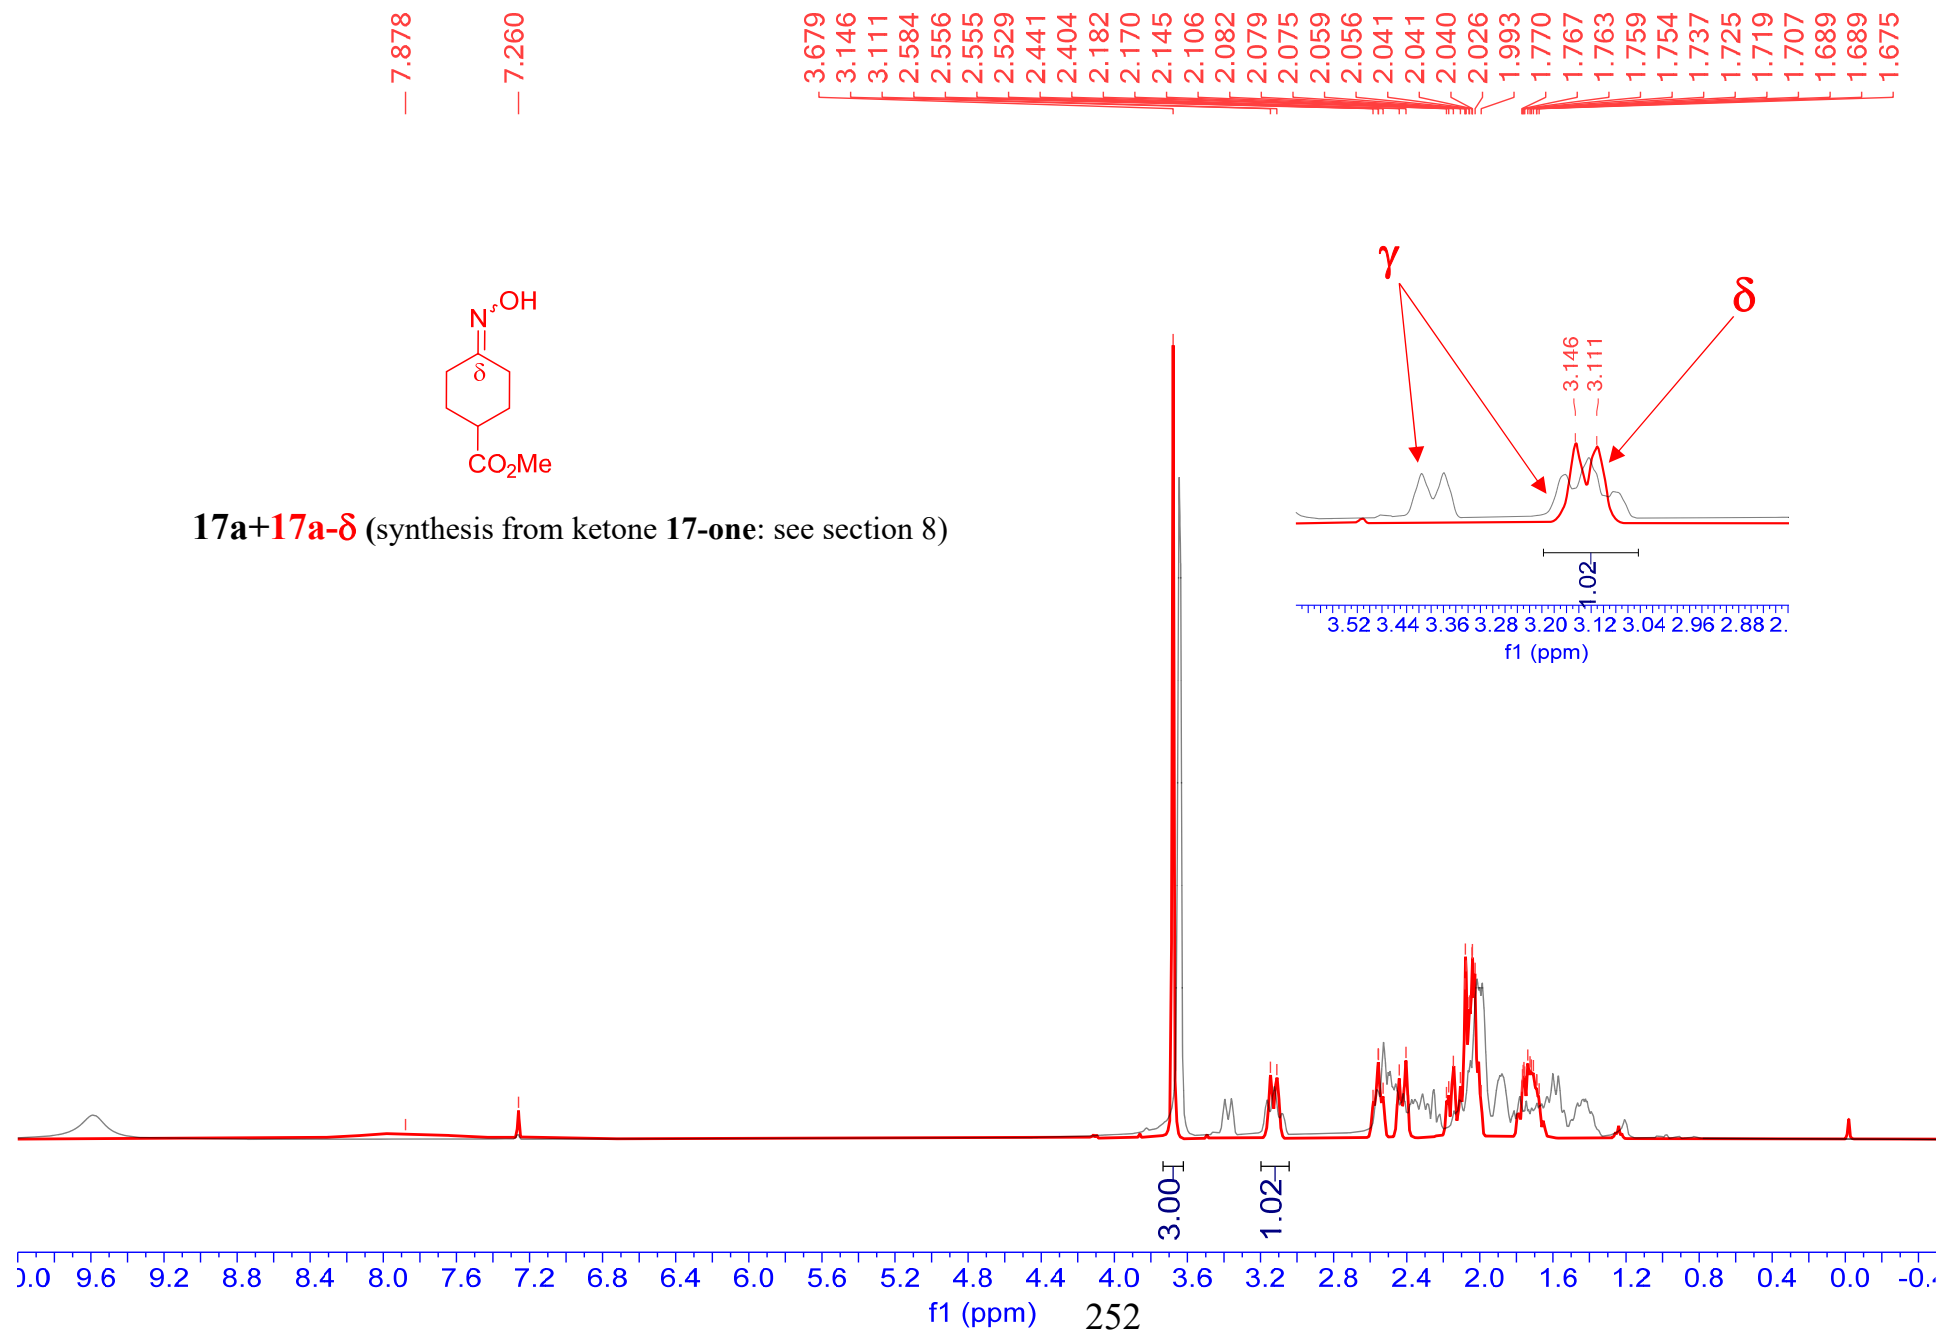



$^{13}\text{C}$  NMR 101 MHz,  $\text{CDCl}_3$

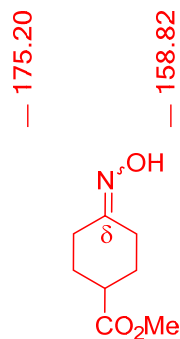

**17a**+**17a- $\delta$**  (synthesis from ketone **17-one**: see section 8)

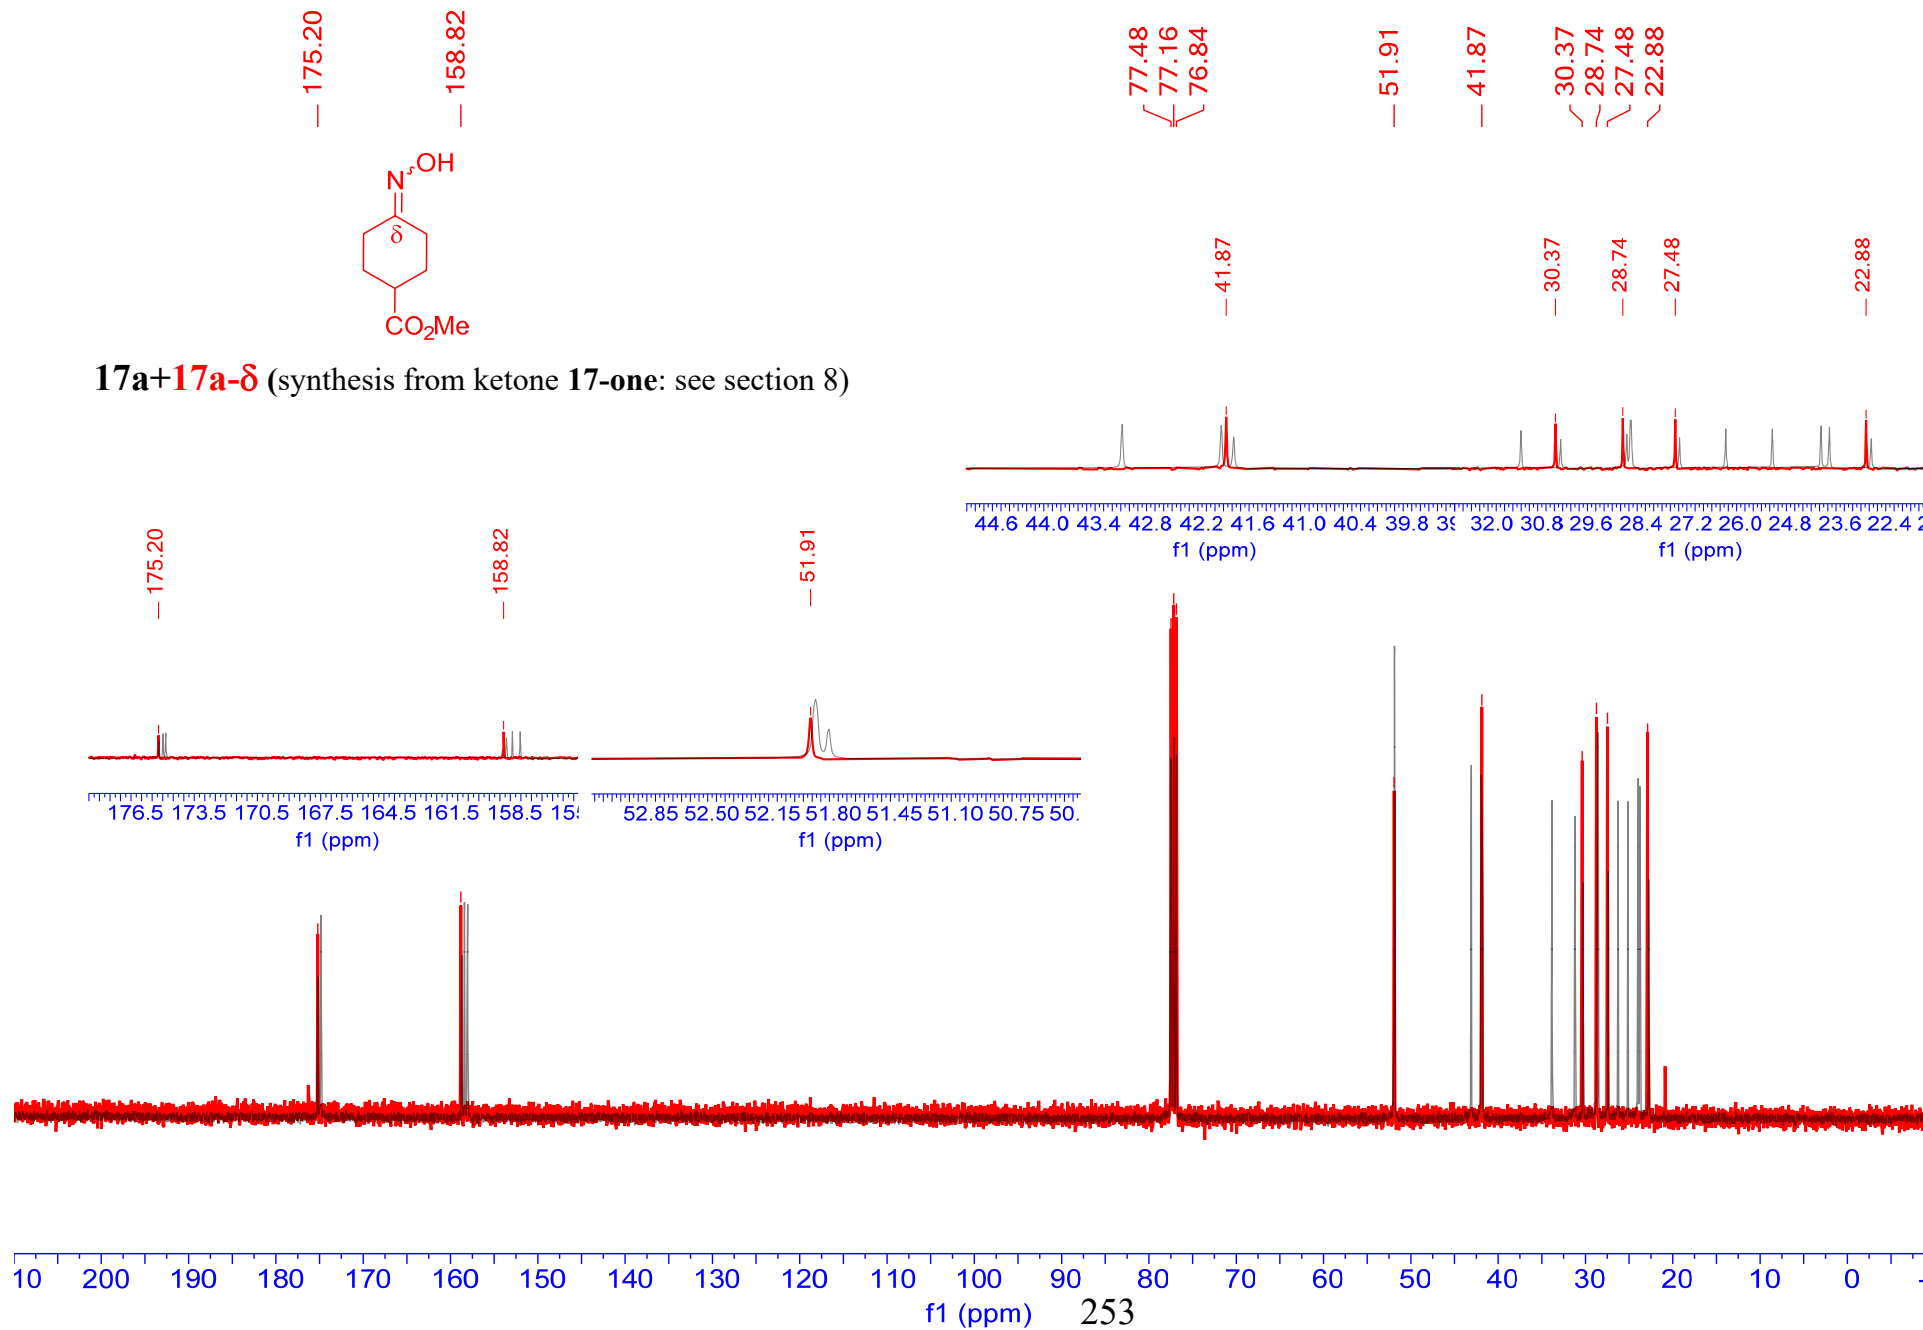

<sup>1</sup>H NMR, 400 MHz, CDCl<sub>3</sub>

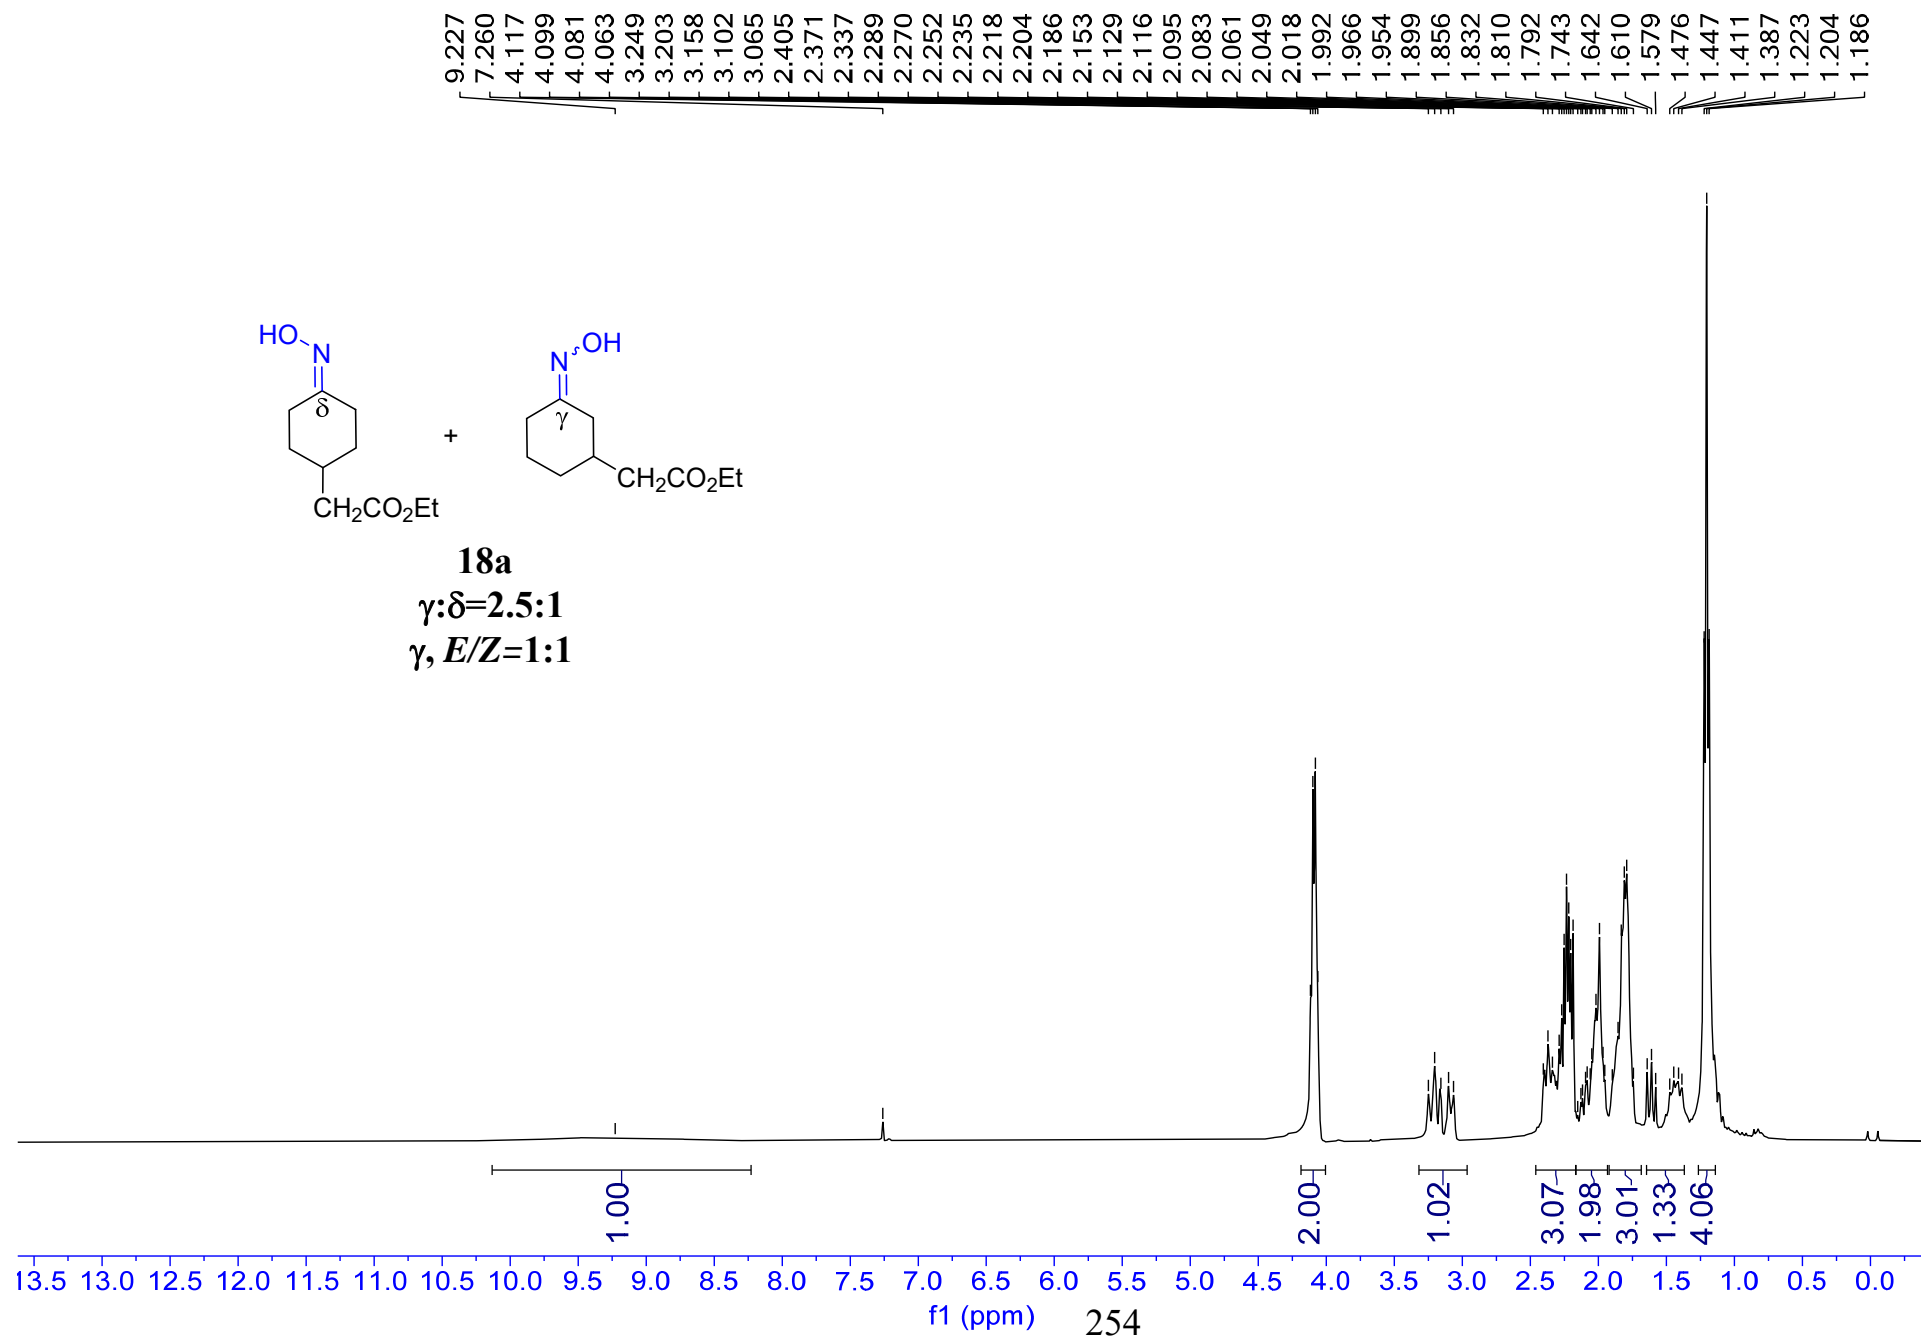

$^{13}\text{C}$  NMR 101 MHz,  $\text{CDCl}_3$

172.71  
172.32  
172.30  
159.59  
159.33  
159.14

77.48  
77.16  
76.84  
60.39  
41.08  
40.94  
40.85  
37.77  
35.07  
33.99  
33.95  
32.55  
31.69  
31.53  
31.31  
31.07  
30.15  
25.27  
23.96  
23.92  
23.44  
14.27  
14.25

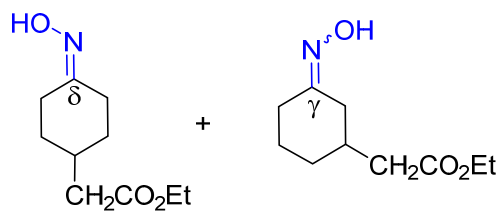

**18a**

$\gamma:\delta=2.5:1$

$\gamma, E/Z=1:1$

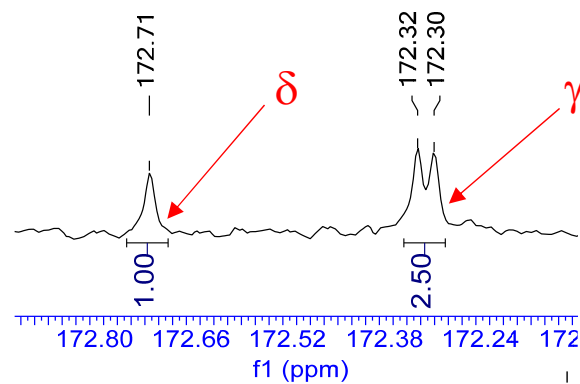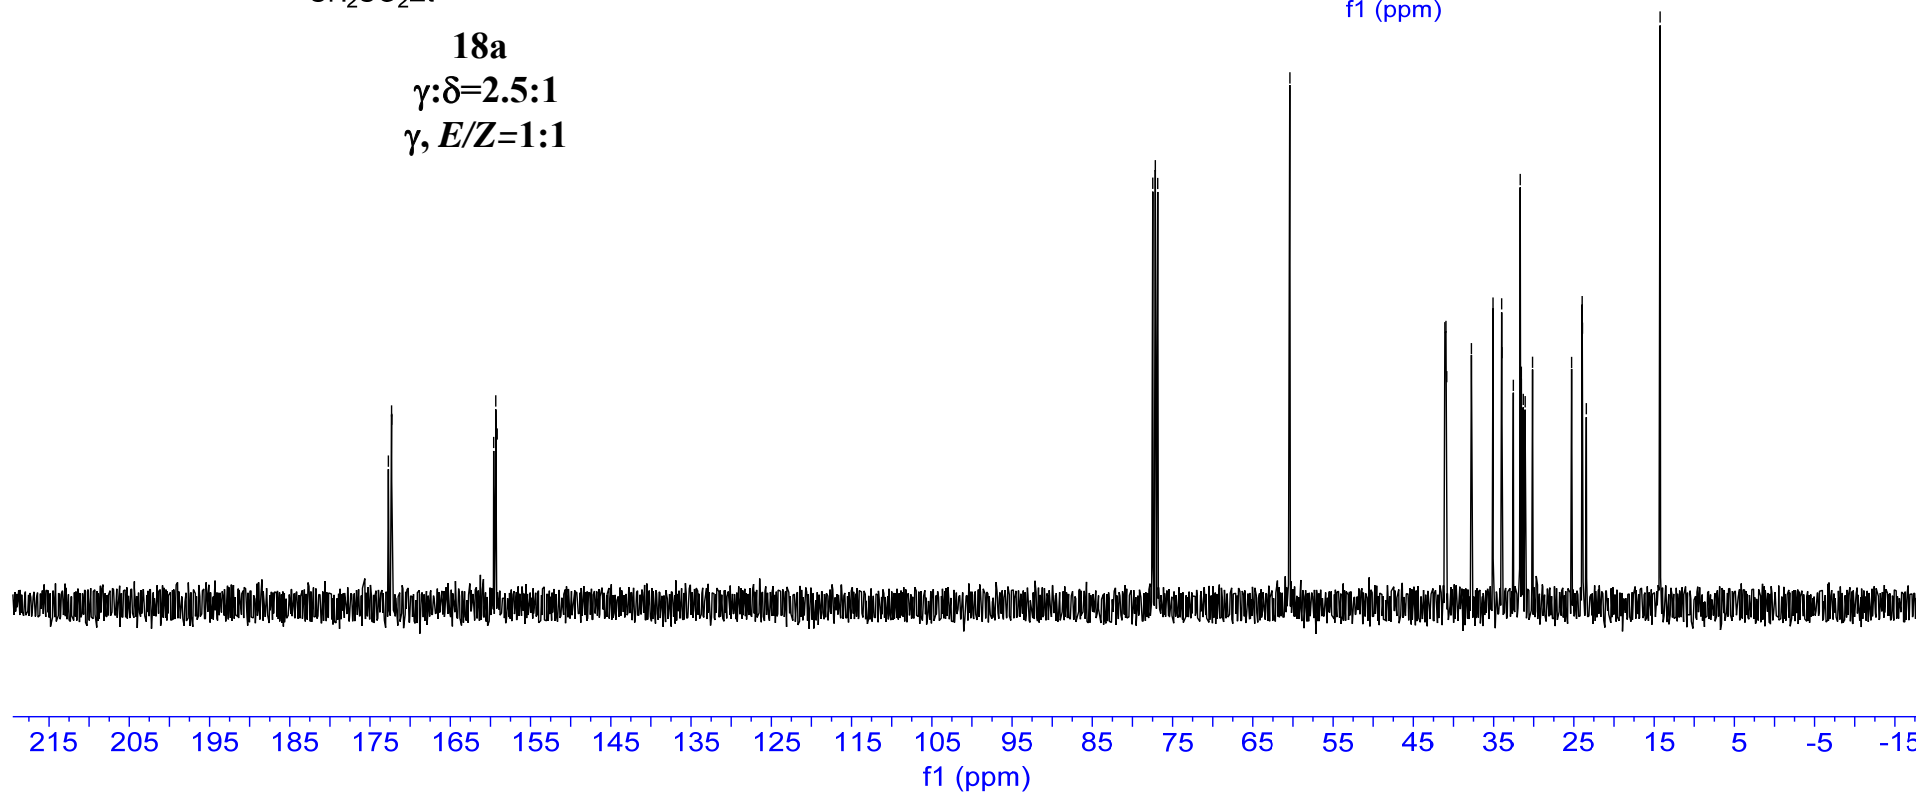

<sup>1</sup>H NMR, 400 MHz, CDCl<sub>3</sub>

— 7.260

4.160  
4.142  
4.124  
4.106  
3.296  
3.291  
3.285  
3.261  
3.255  
3.248  
2.411  
2.374  
2.247  
2.229  
2.140  
2.128  
1.940  
1.937  
1.927  
1.919  
1.908  
1.895  
1.887  
1.880  
1.869  
1.839  
1.834  
1.272  
1.254  
1.248  
1.236

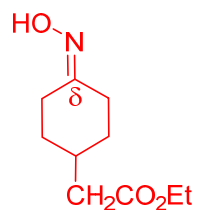

**18a+18a-δ** (synthesis from ketone **18-one**: see section 8)

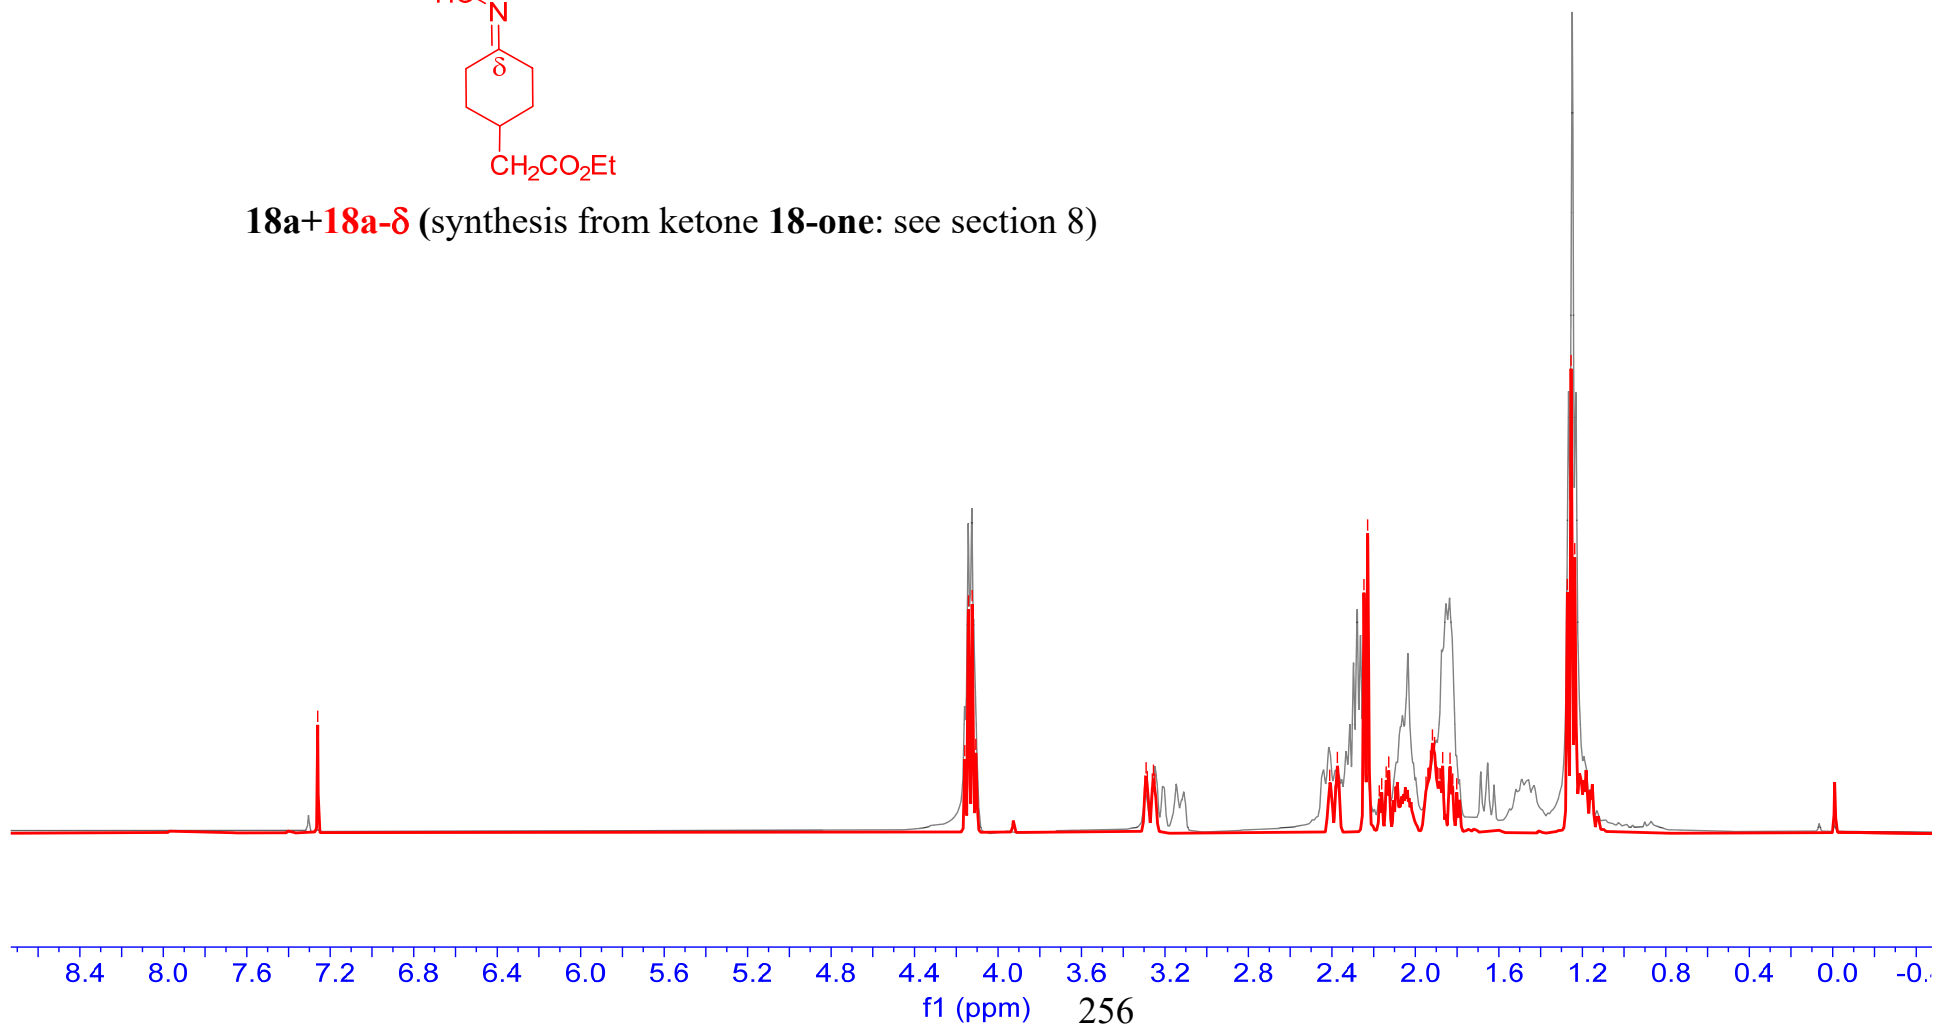

$^{13}\text{C}$  NMR 101 MHz,  $\text{CDCl}_3$

— 172.76  
— 159.92

77.48  
77.16  
76.84

— 60.50

40.96  
34.07  
32.68  
31.44  
31.26

— 23.49

— 14.39

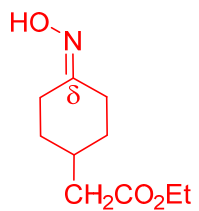

**18a+18a- $\delta$**  (synthesis from ketone **18-one**: see section 8)

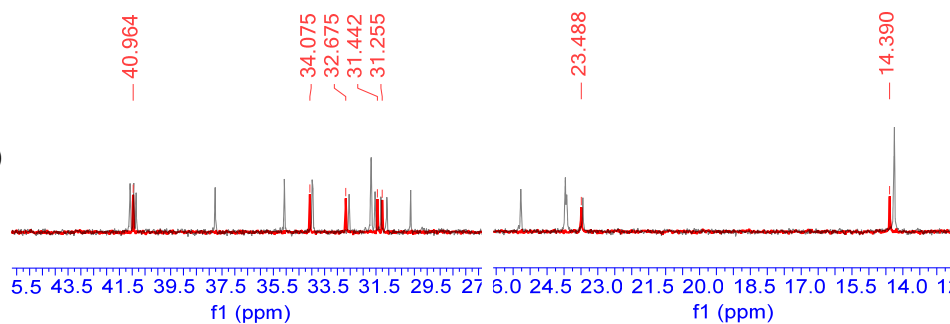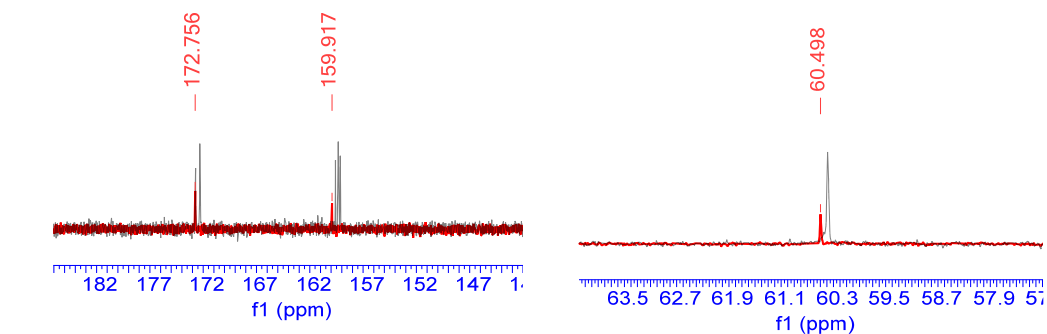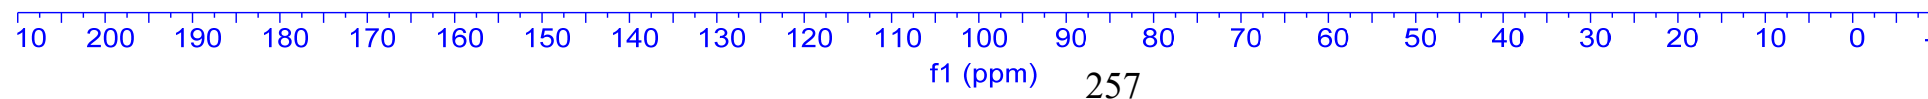

<sup>1</sup>H NMR, 400 MHz, CDCl<sub>3</sub>

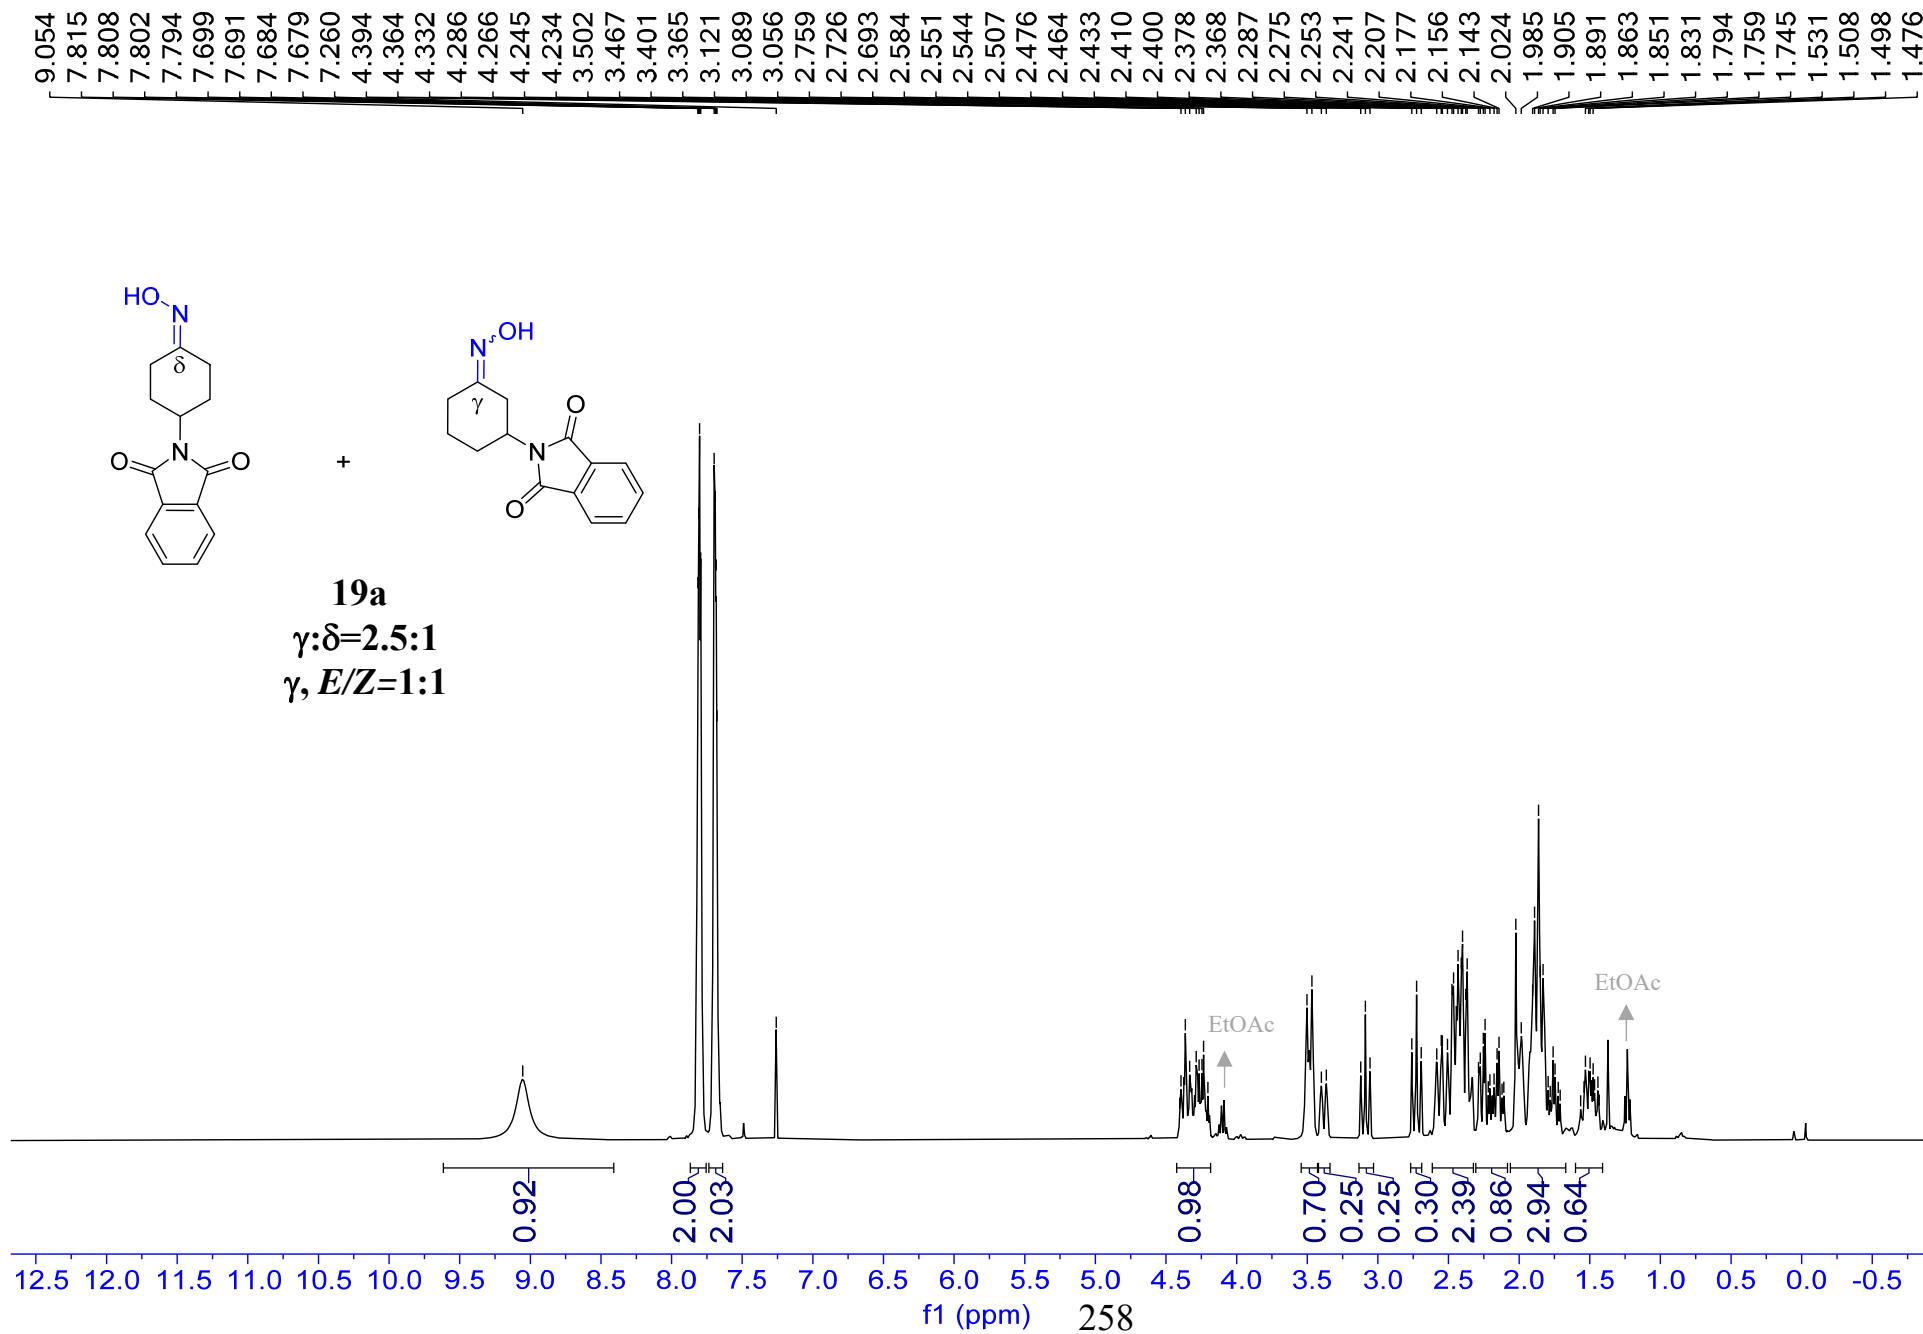

$^{13}\text{C}$  NMR 101 MHz,  $\text{CDCl}_3$

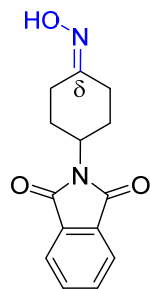

+

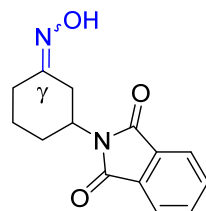

**19a**  
 $\gamma:\delta=2.5:1$   
 $\gamma, E/Z=1:1$

168.29  
 168.24  
 168.22  
 158.27  
 157.74  
 157.67

134.11  
 134.07  
 131.96  
 131.92  
 123.34  
 123.31  
 123.20

77.48  
 77.16  
 76.84

49.93  
 49.55  
 48.78  
 35.10  
 30.88  
 30.83  
 29.36  
 29.27  
 29.18  
 27.93  
 27.70  
 24.26  
 23.39  
 23.23  
 23.10

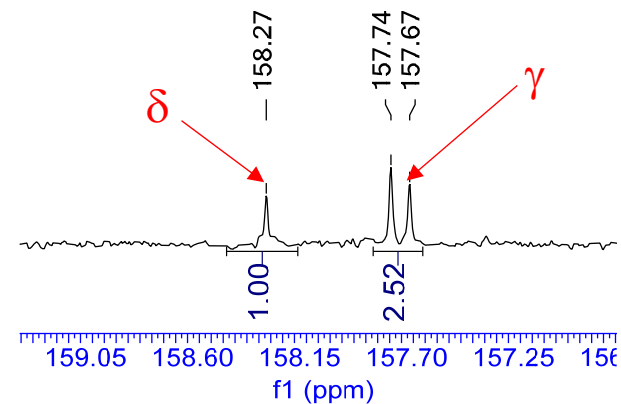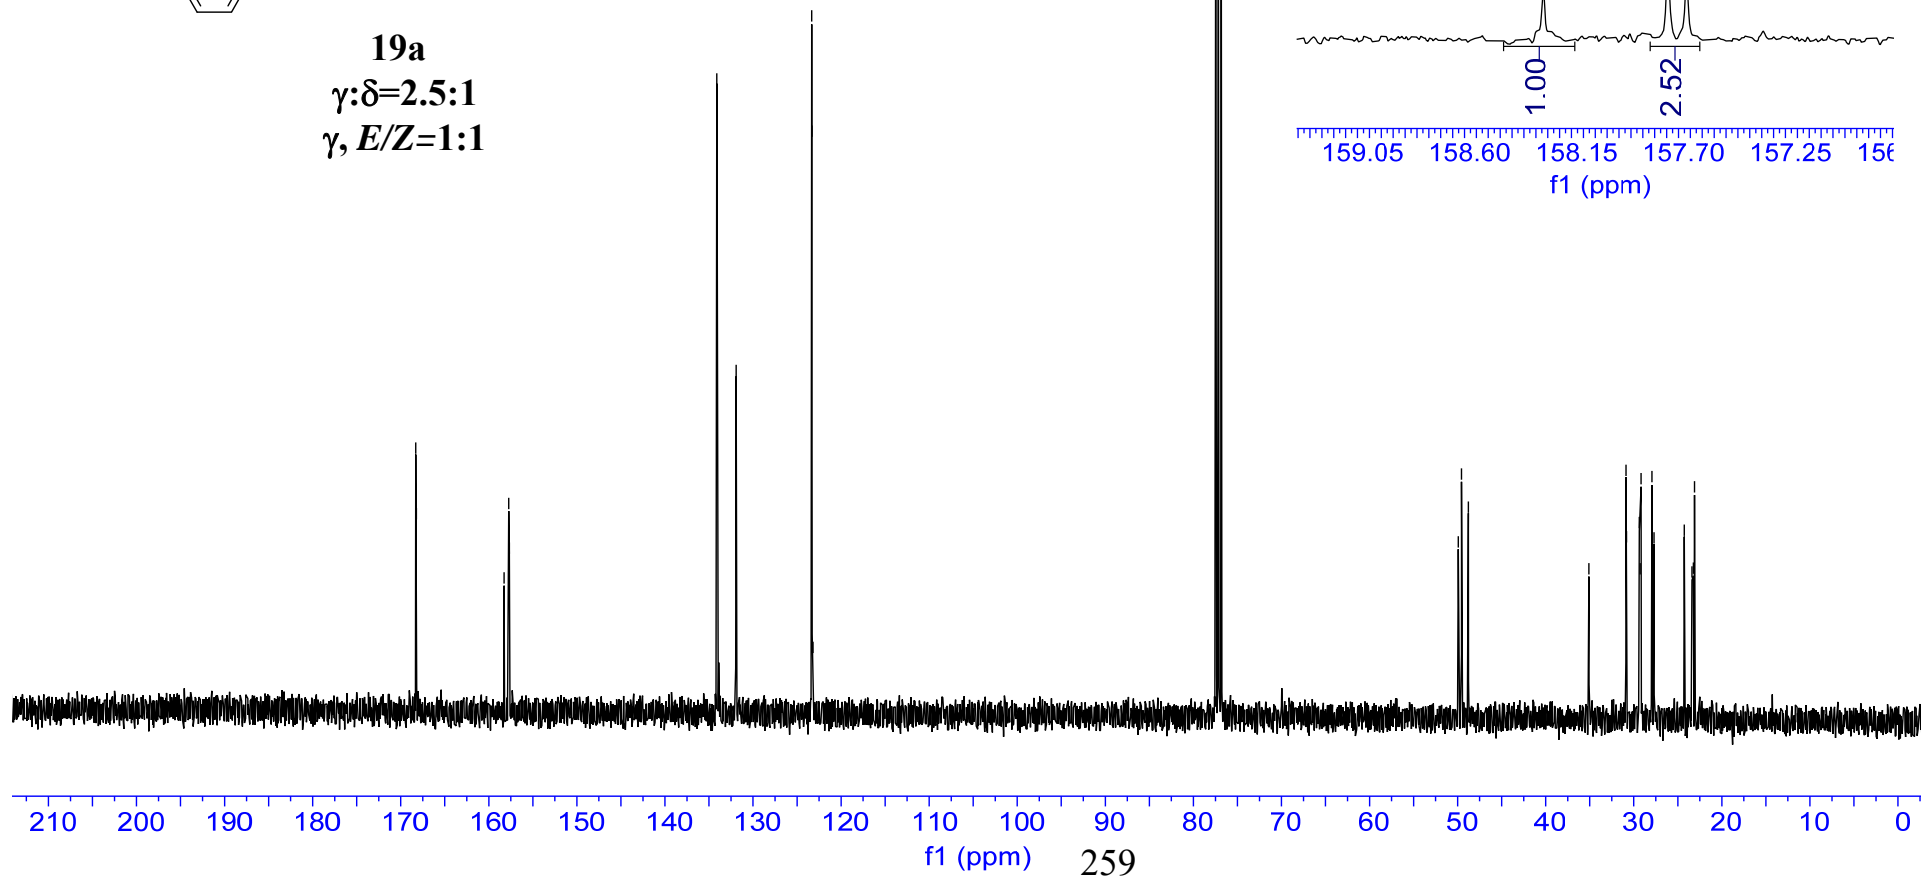

$^1\text{H}$  NMR, 400 MHz,  $\text{CDCl}_3$

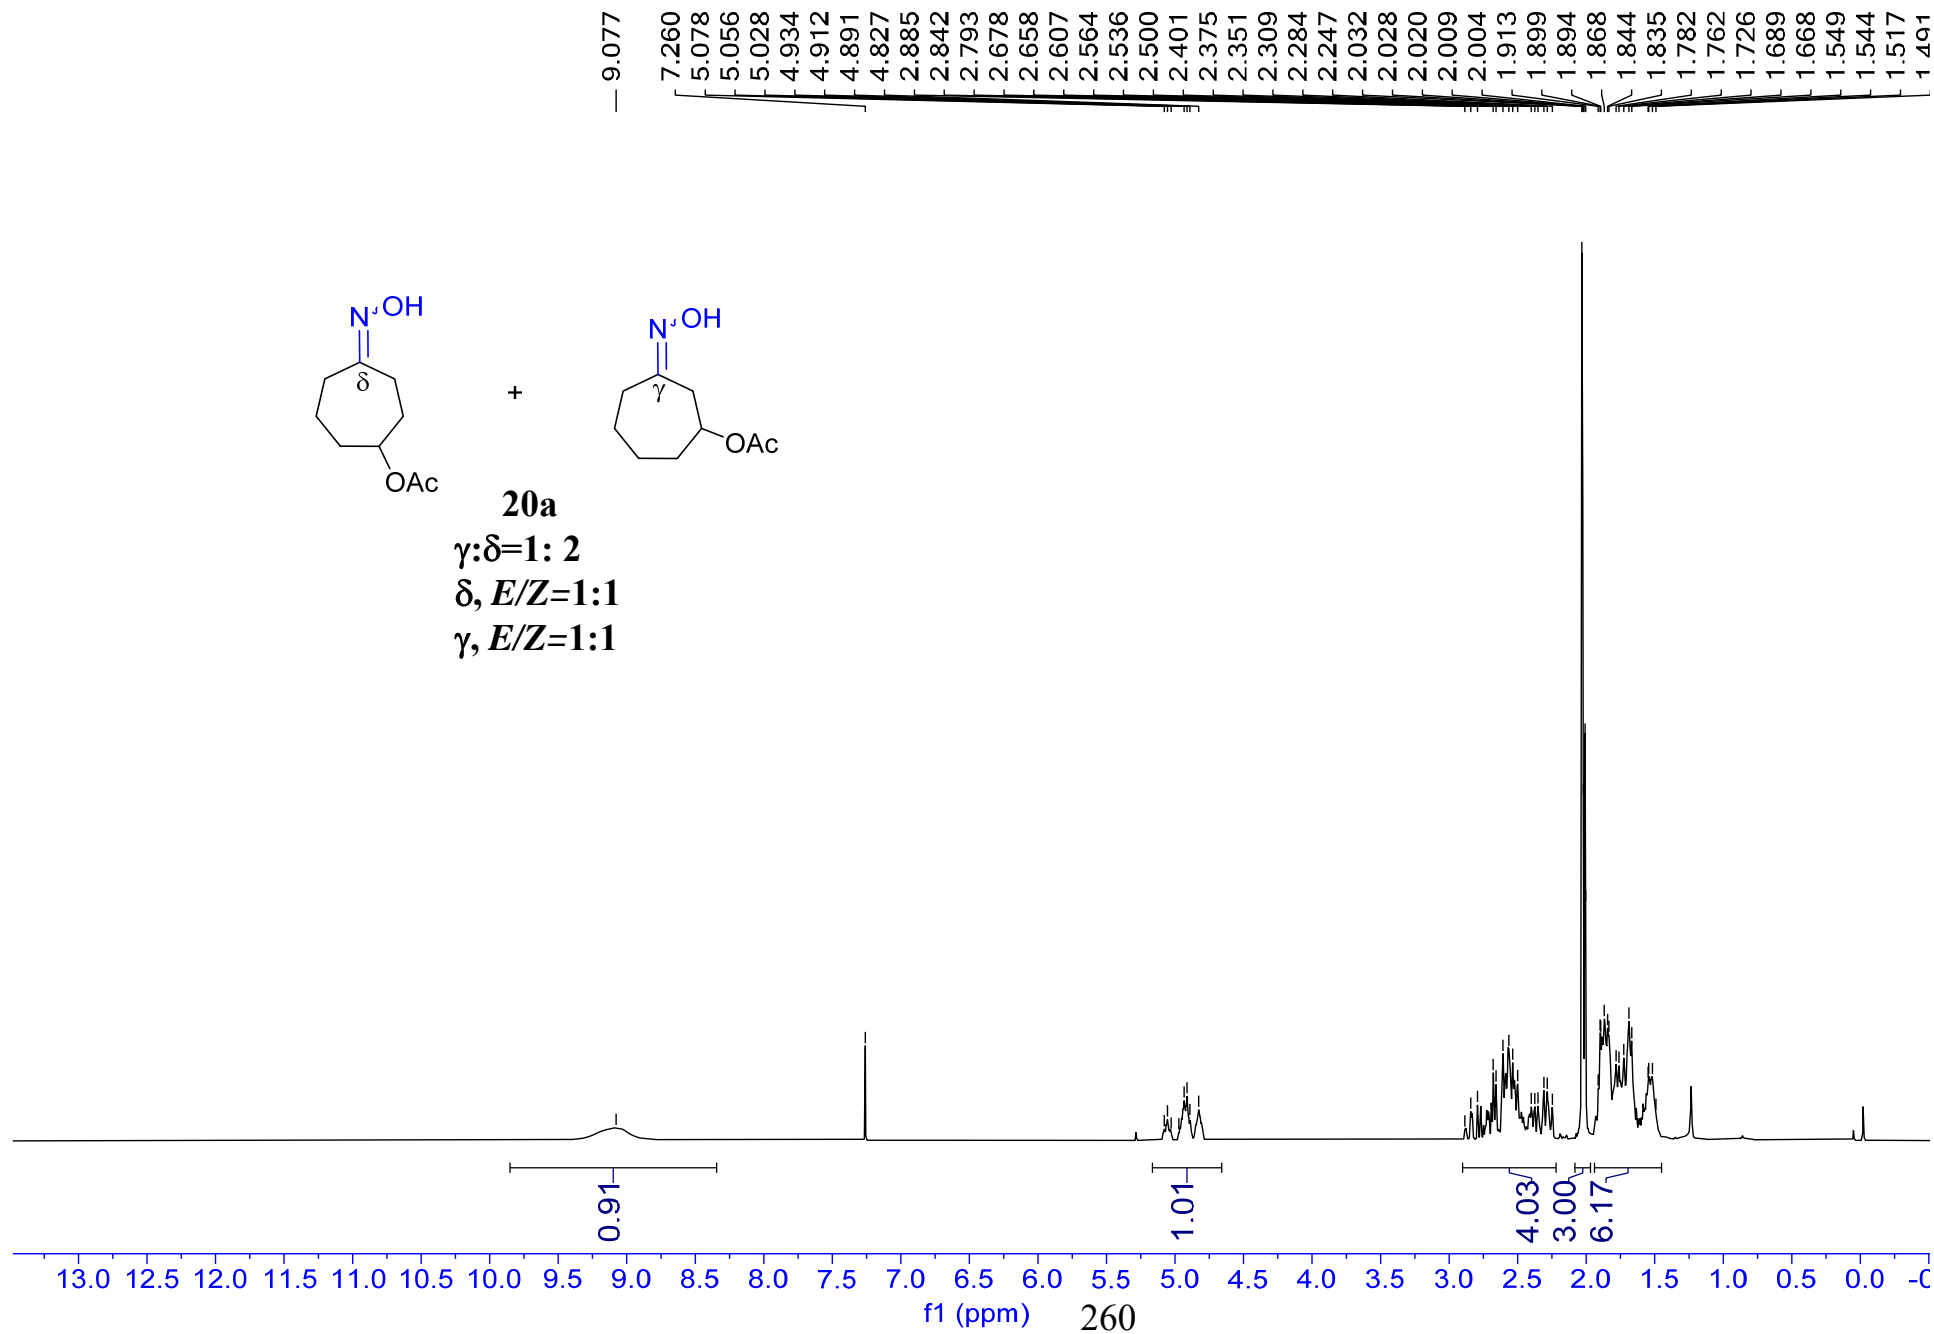



<sup>13</sup>C NMR 101 MHz, CDCl<sub>3</sub>

170.52  
170.44  
170.38  
170.29  
162.96  
162.54  
159.23  
158.91

77.48  
77.16  
76.84  
74.44  
73.72  
71.74  
71.20  
38.35  
35.65  
35.02  
34.76  
34.69  
33.92  
33.74  
33.07  
32.29  
29.49  
28.48  
28.31  
27.69  
27.04  
25.25  
24.43  
23.90  
22.73  
21.76  
21.44  
21.38  
21.25  
18.76

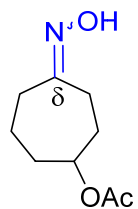

+

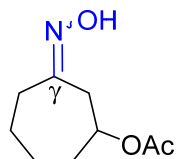

**20a**

$\gamma:\delta=1:2$

$\delta, E/Z=1:1$

$\gamma, E/Z=1:1$

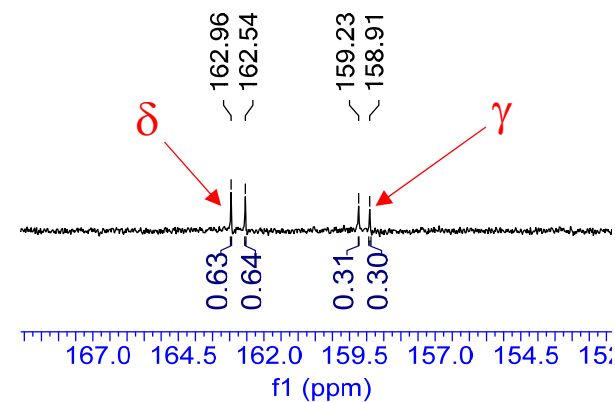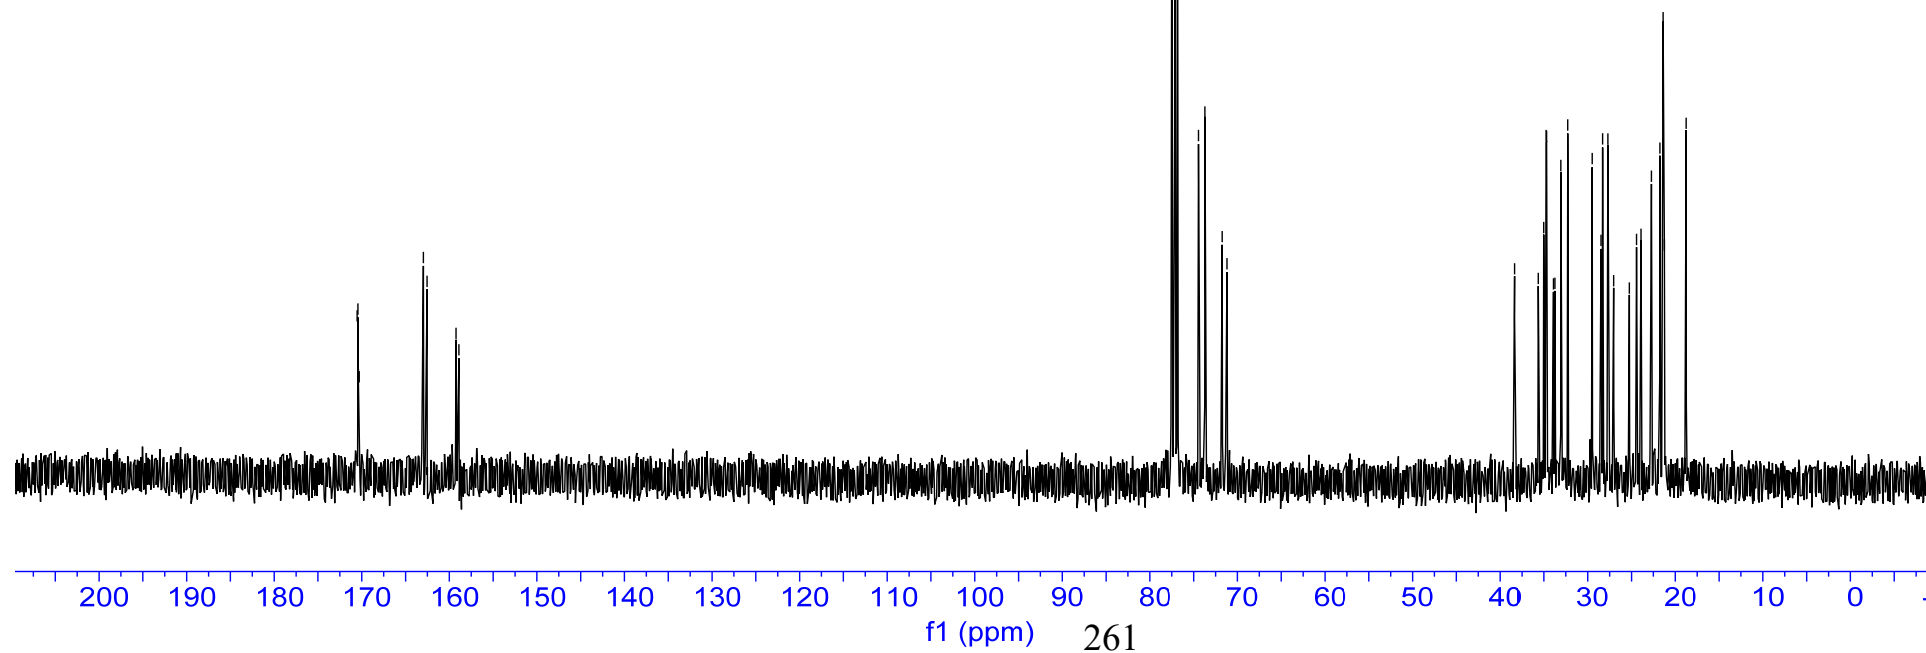

<sup>1</sup>H NMR, 400 MHz, CDCl<sub>3</sub>

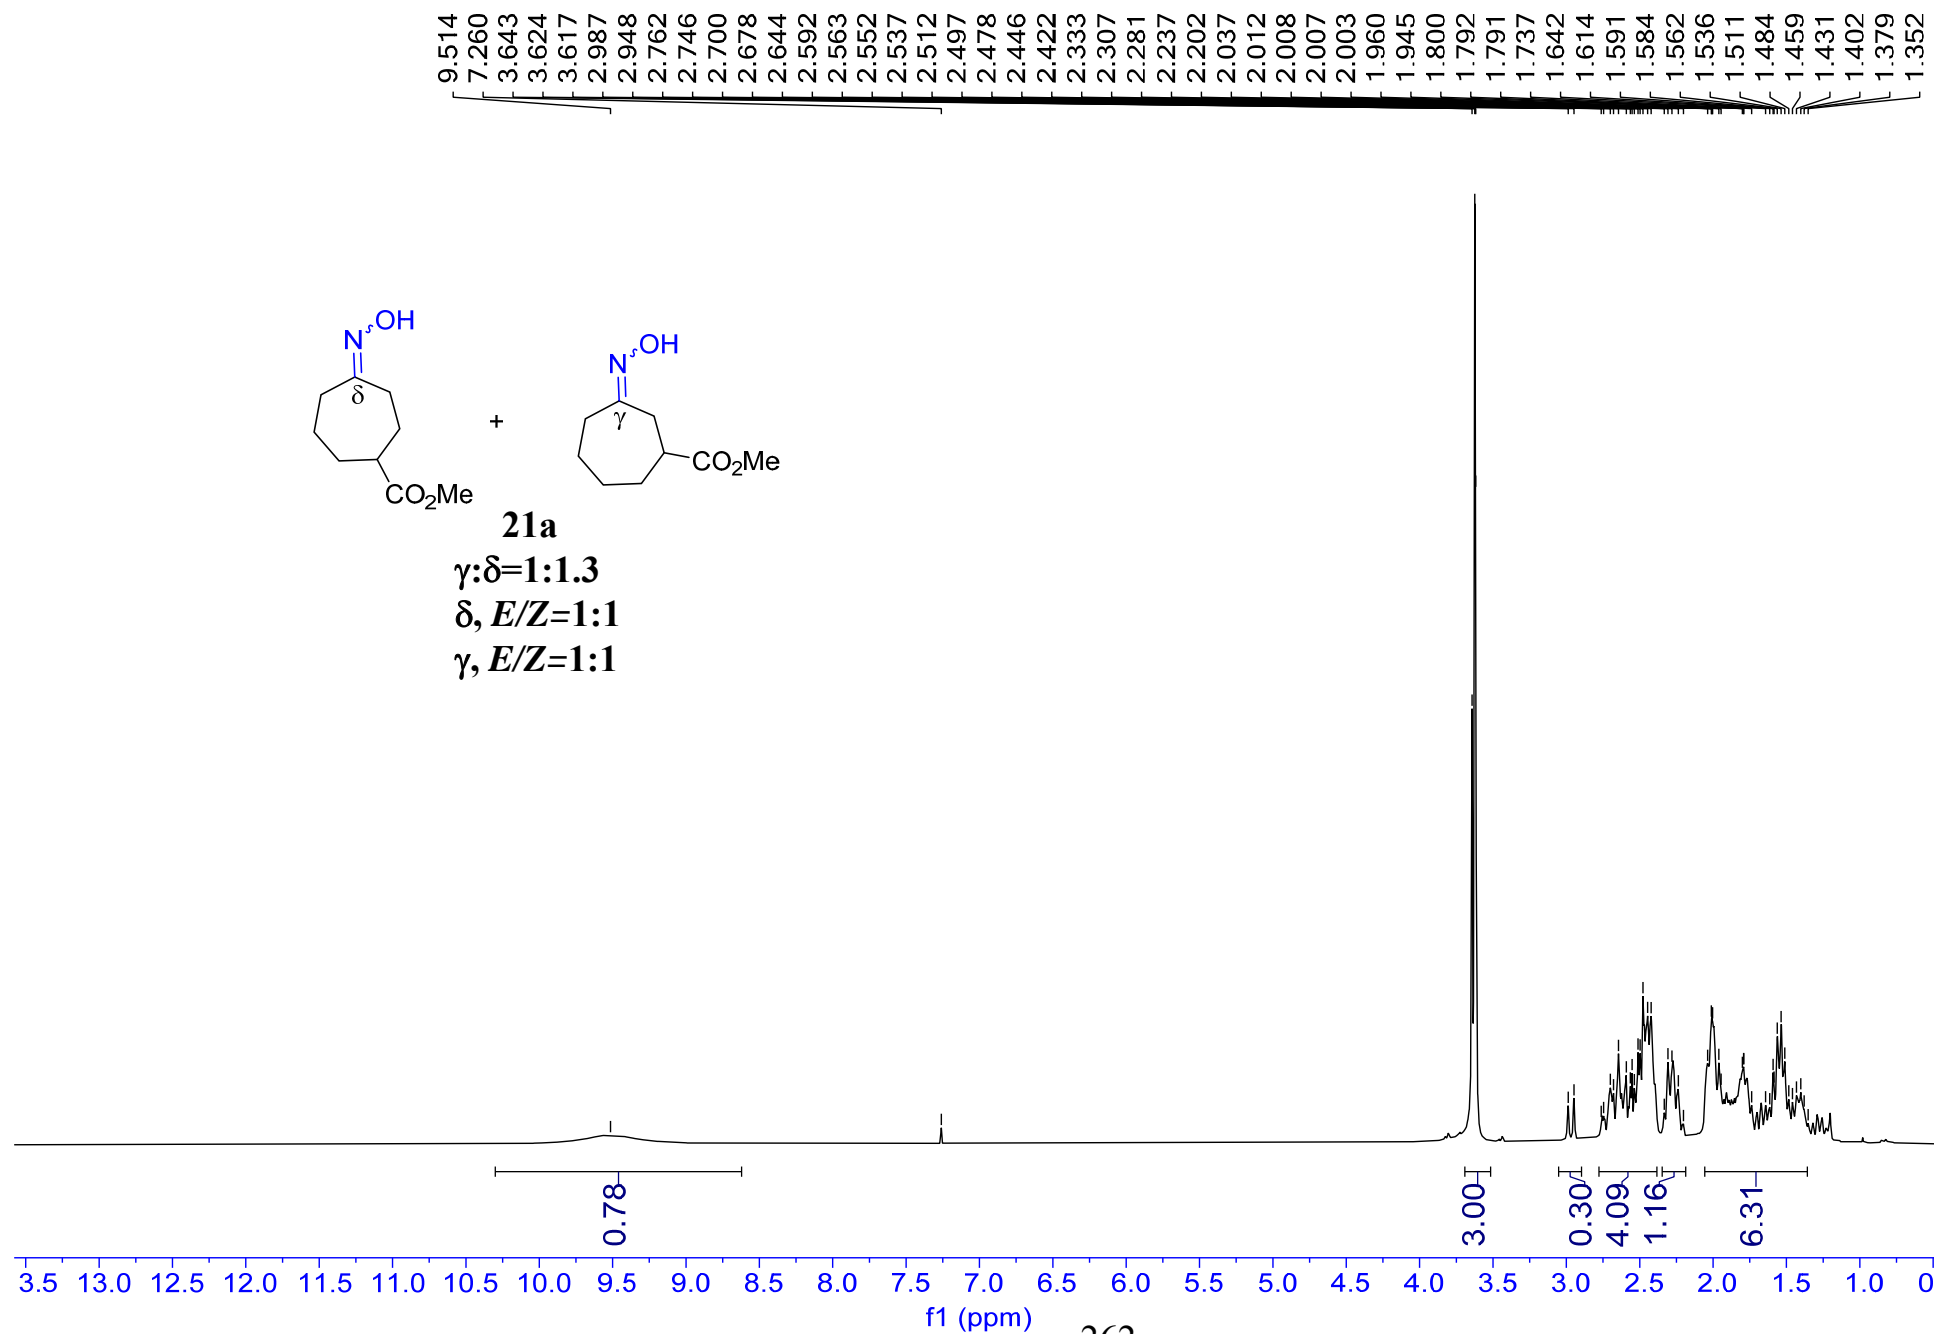

$^{13}\text{C}$  NMR 101 MHz,  $\text{CDCl}_3$

176.24  
175.97  
175.69  
163.02  
162.79  
161.42  
160.88

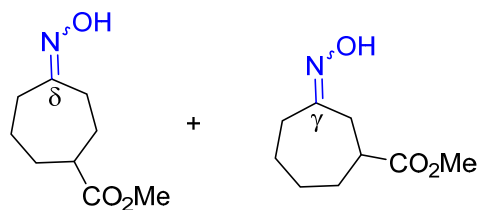

**21a**

$\gamma:\delta=1:1.3$

$\delta, E/Z=1:1$

$\gamma, E/Z=1:1$

77.48  
77.16  
76.84  
51.89  
51.83  
51.73  
51.71  
46.61  
46.39  
44.14  
41.54  
35.59  
33.52  
33.12  
33.09  
32.97  
32.56  
32.45  
31.46  
30.59  
29.60  
28.30  
28.24  
28.19  
27.97  
26.89  
26.76  
26.57  
25.57  
23.93  
22.55

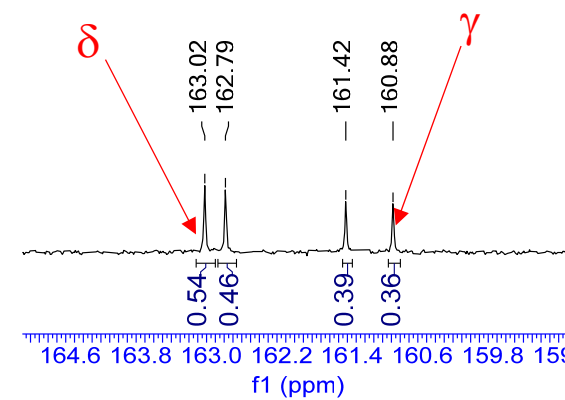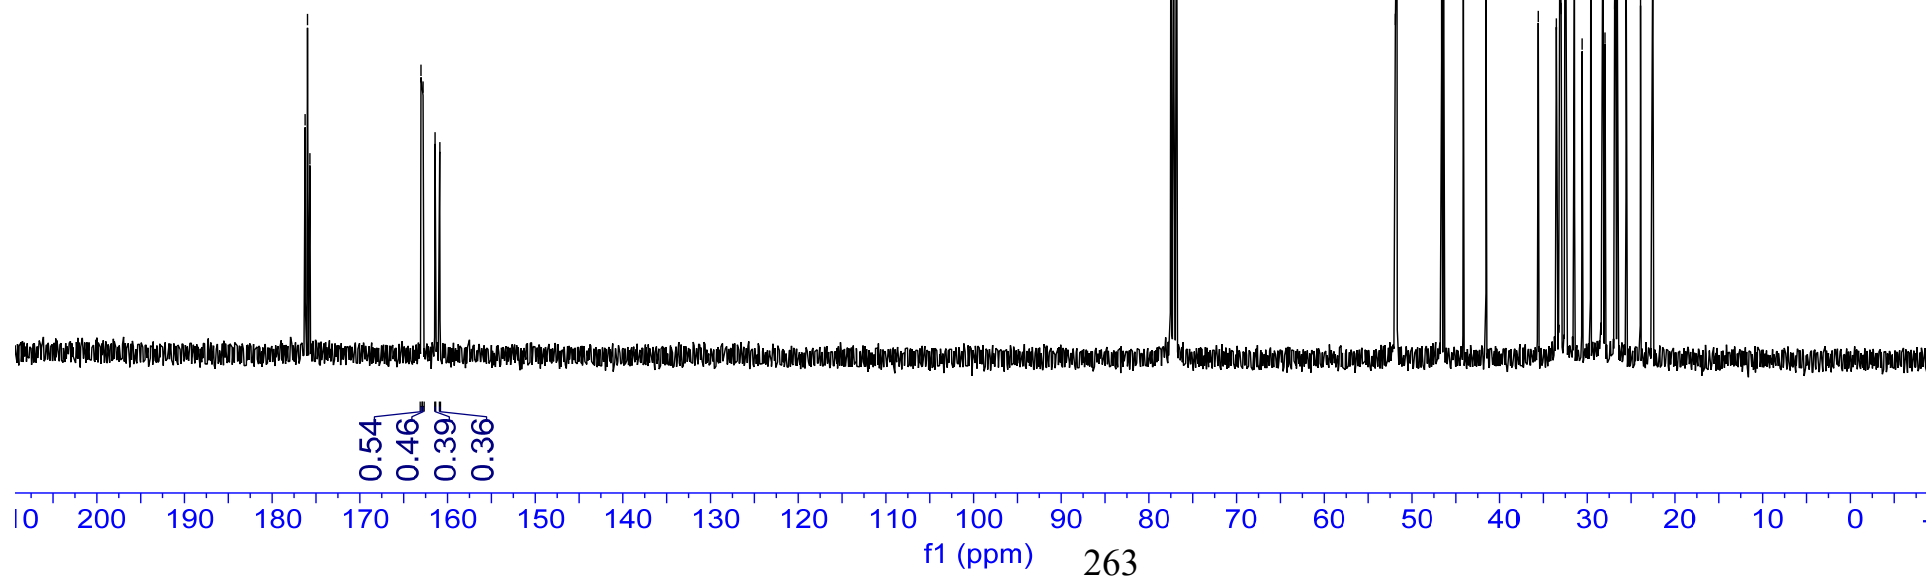

<sup>1</sup>H NMR, 400 MHz, CDCl<sub>3</sub>

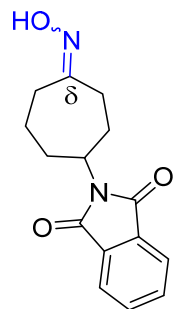

**22a (δ-product)**  
***E/Z*=1:1**

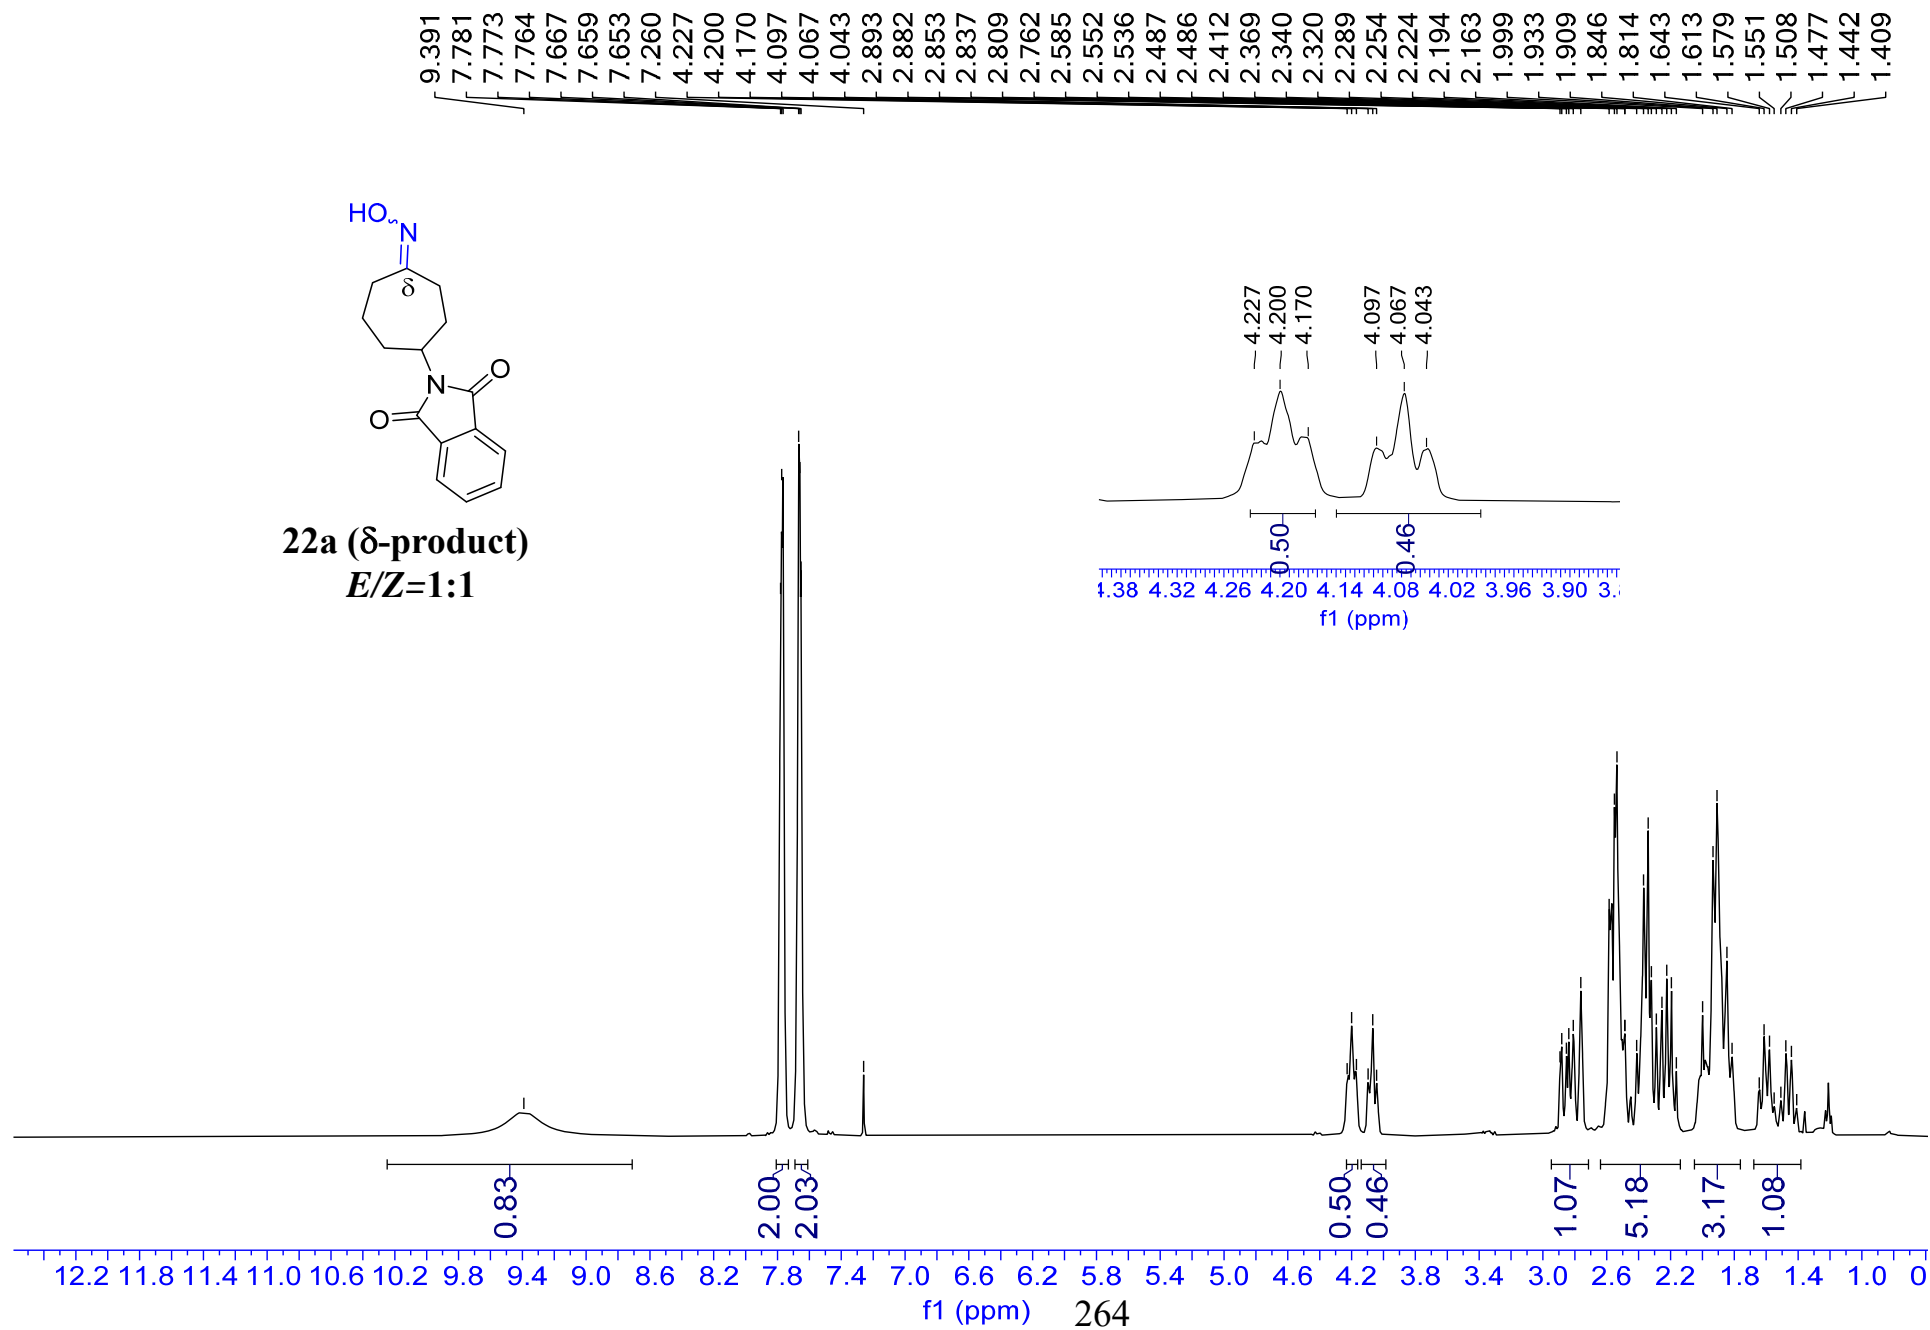

<sup>13</sup>C NMR 101 MHz, CDCl<sub>3</sub>

168.09  
168.03  
162.66  
162.51

133.93  
131.95  
131.92  
— 123.19

77.48  
77.16  
76.84

— 53.70

33.97  
33.73  
32.91  
31.10  
30.70  
29.39  
28.23  
25.89  
24.85  
22.02

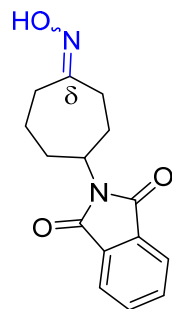

**22a (δ-product)**  
*E/Z*=1:1

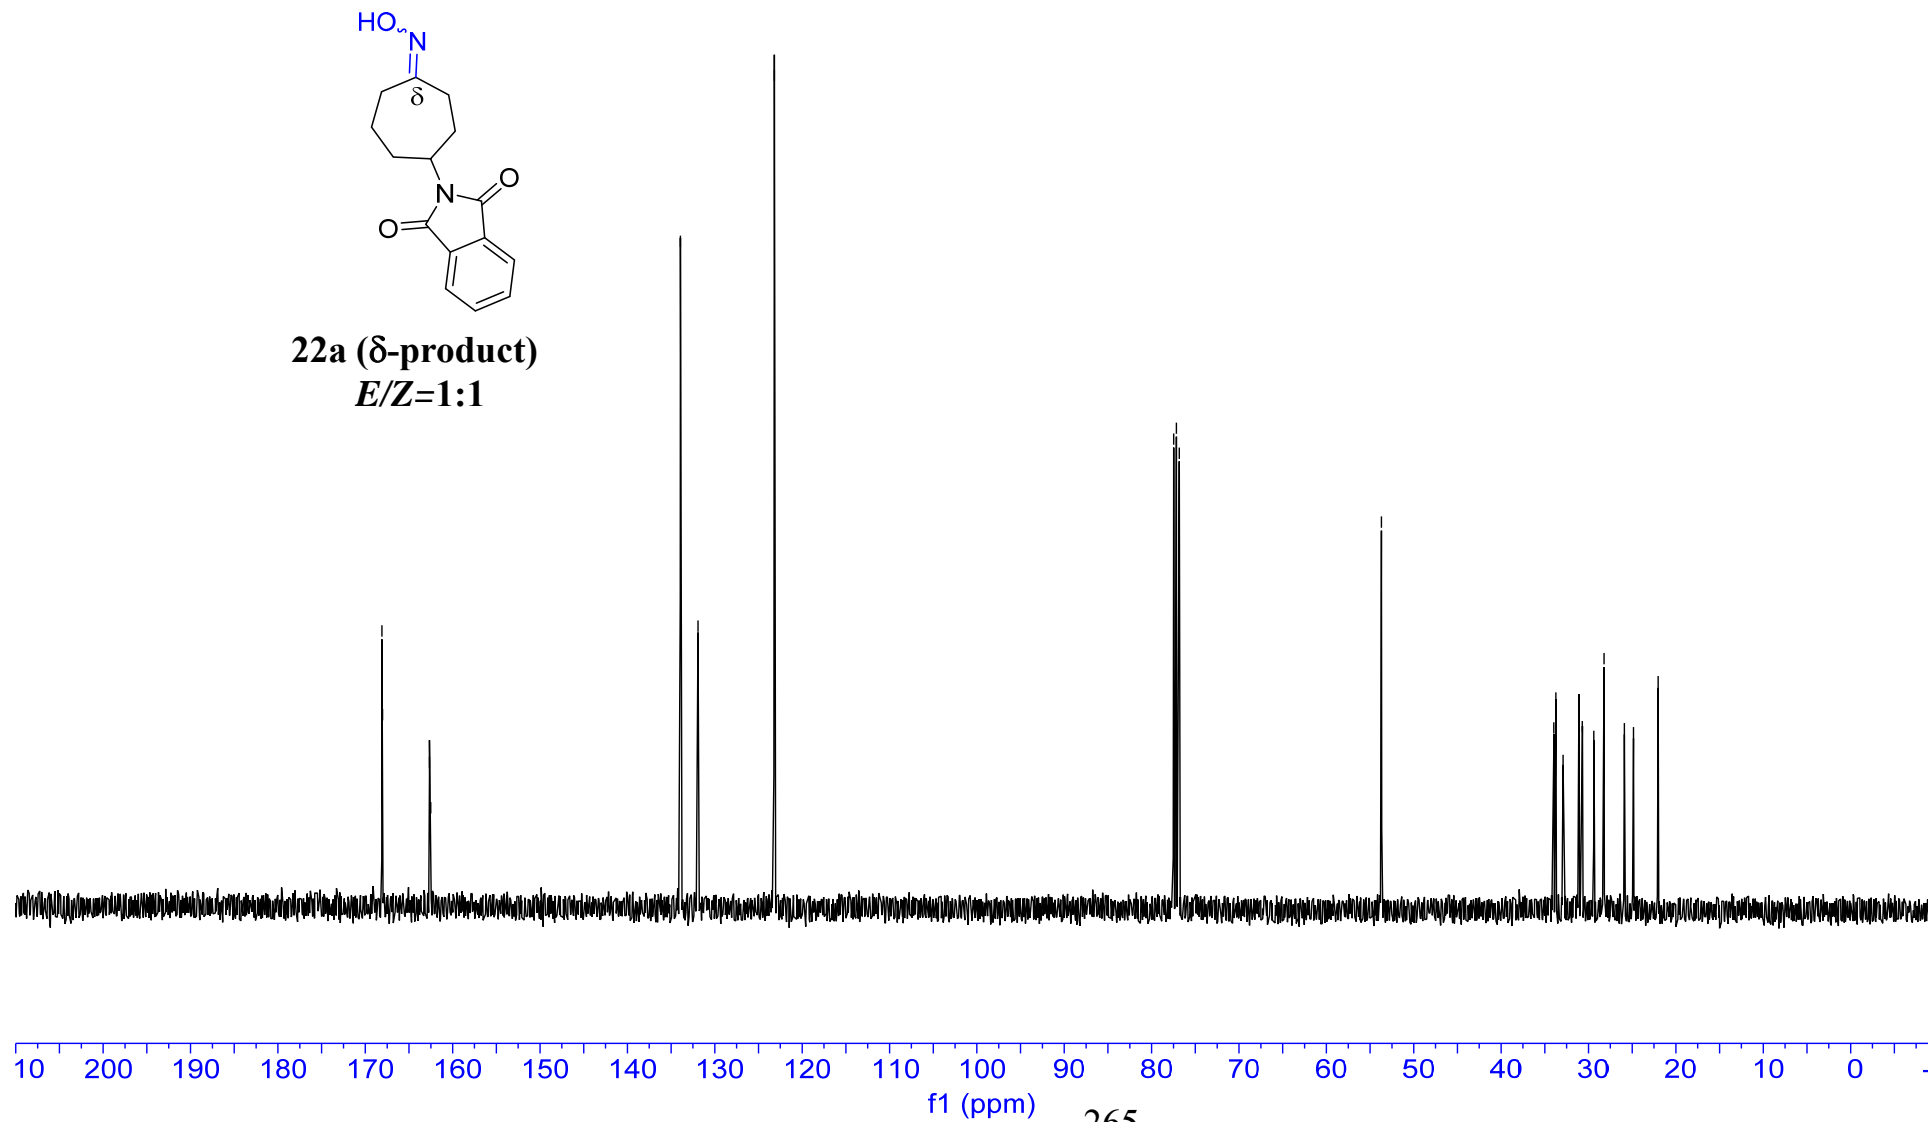

<sup>1</sup>H NMR, 400 MHz, CDCl<sub>3</sub>

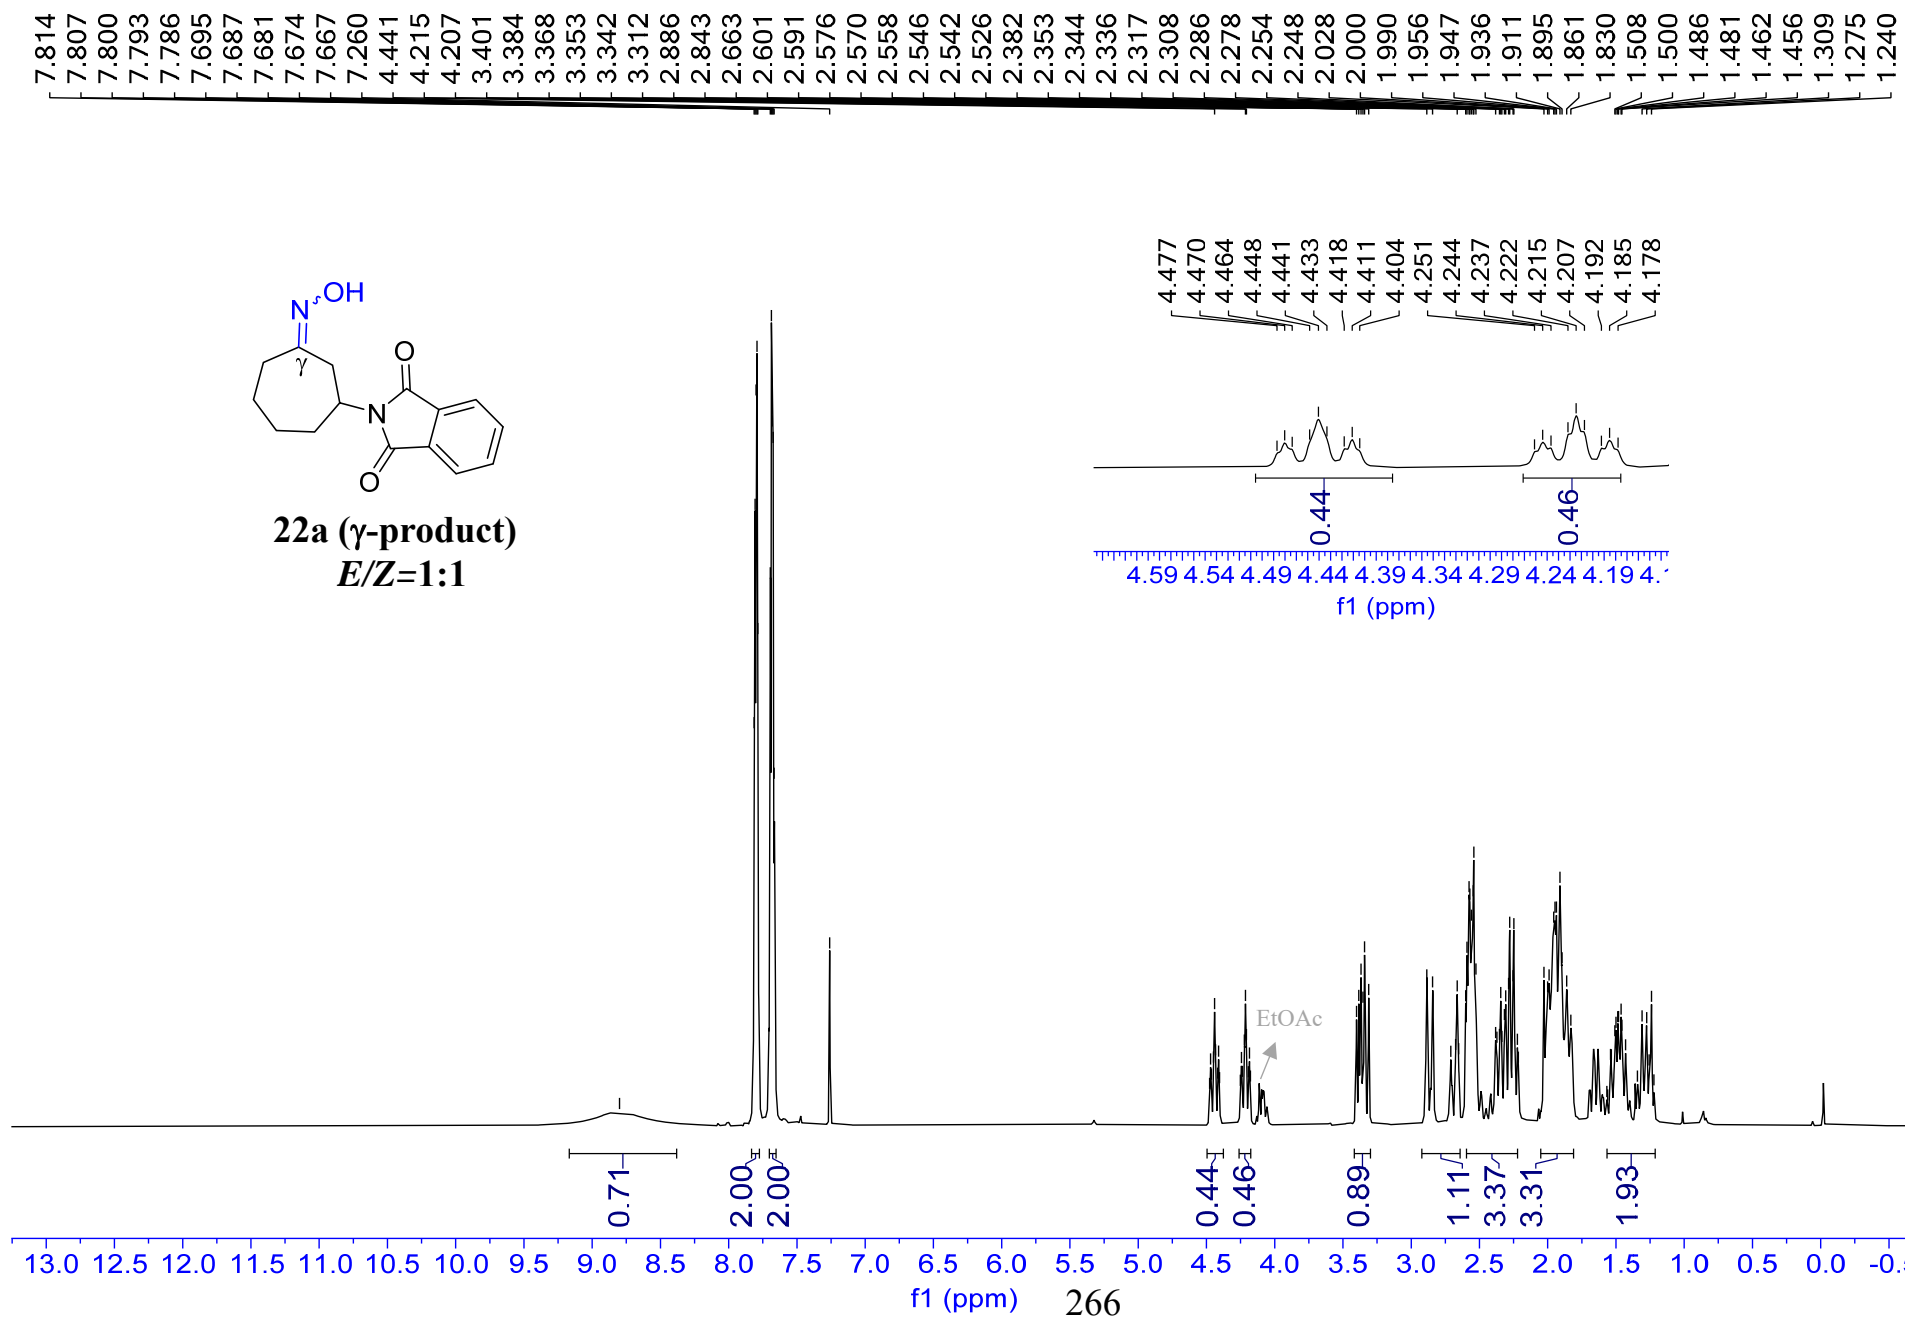

<sup>13</sup>C NMR 101 MHz, CDCl<sub>3</sub>

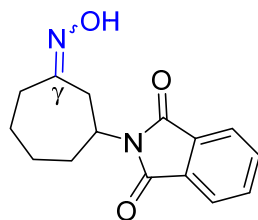

**22a (γ-product)**  
*E/Z*=1:1

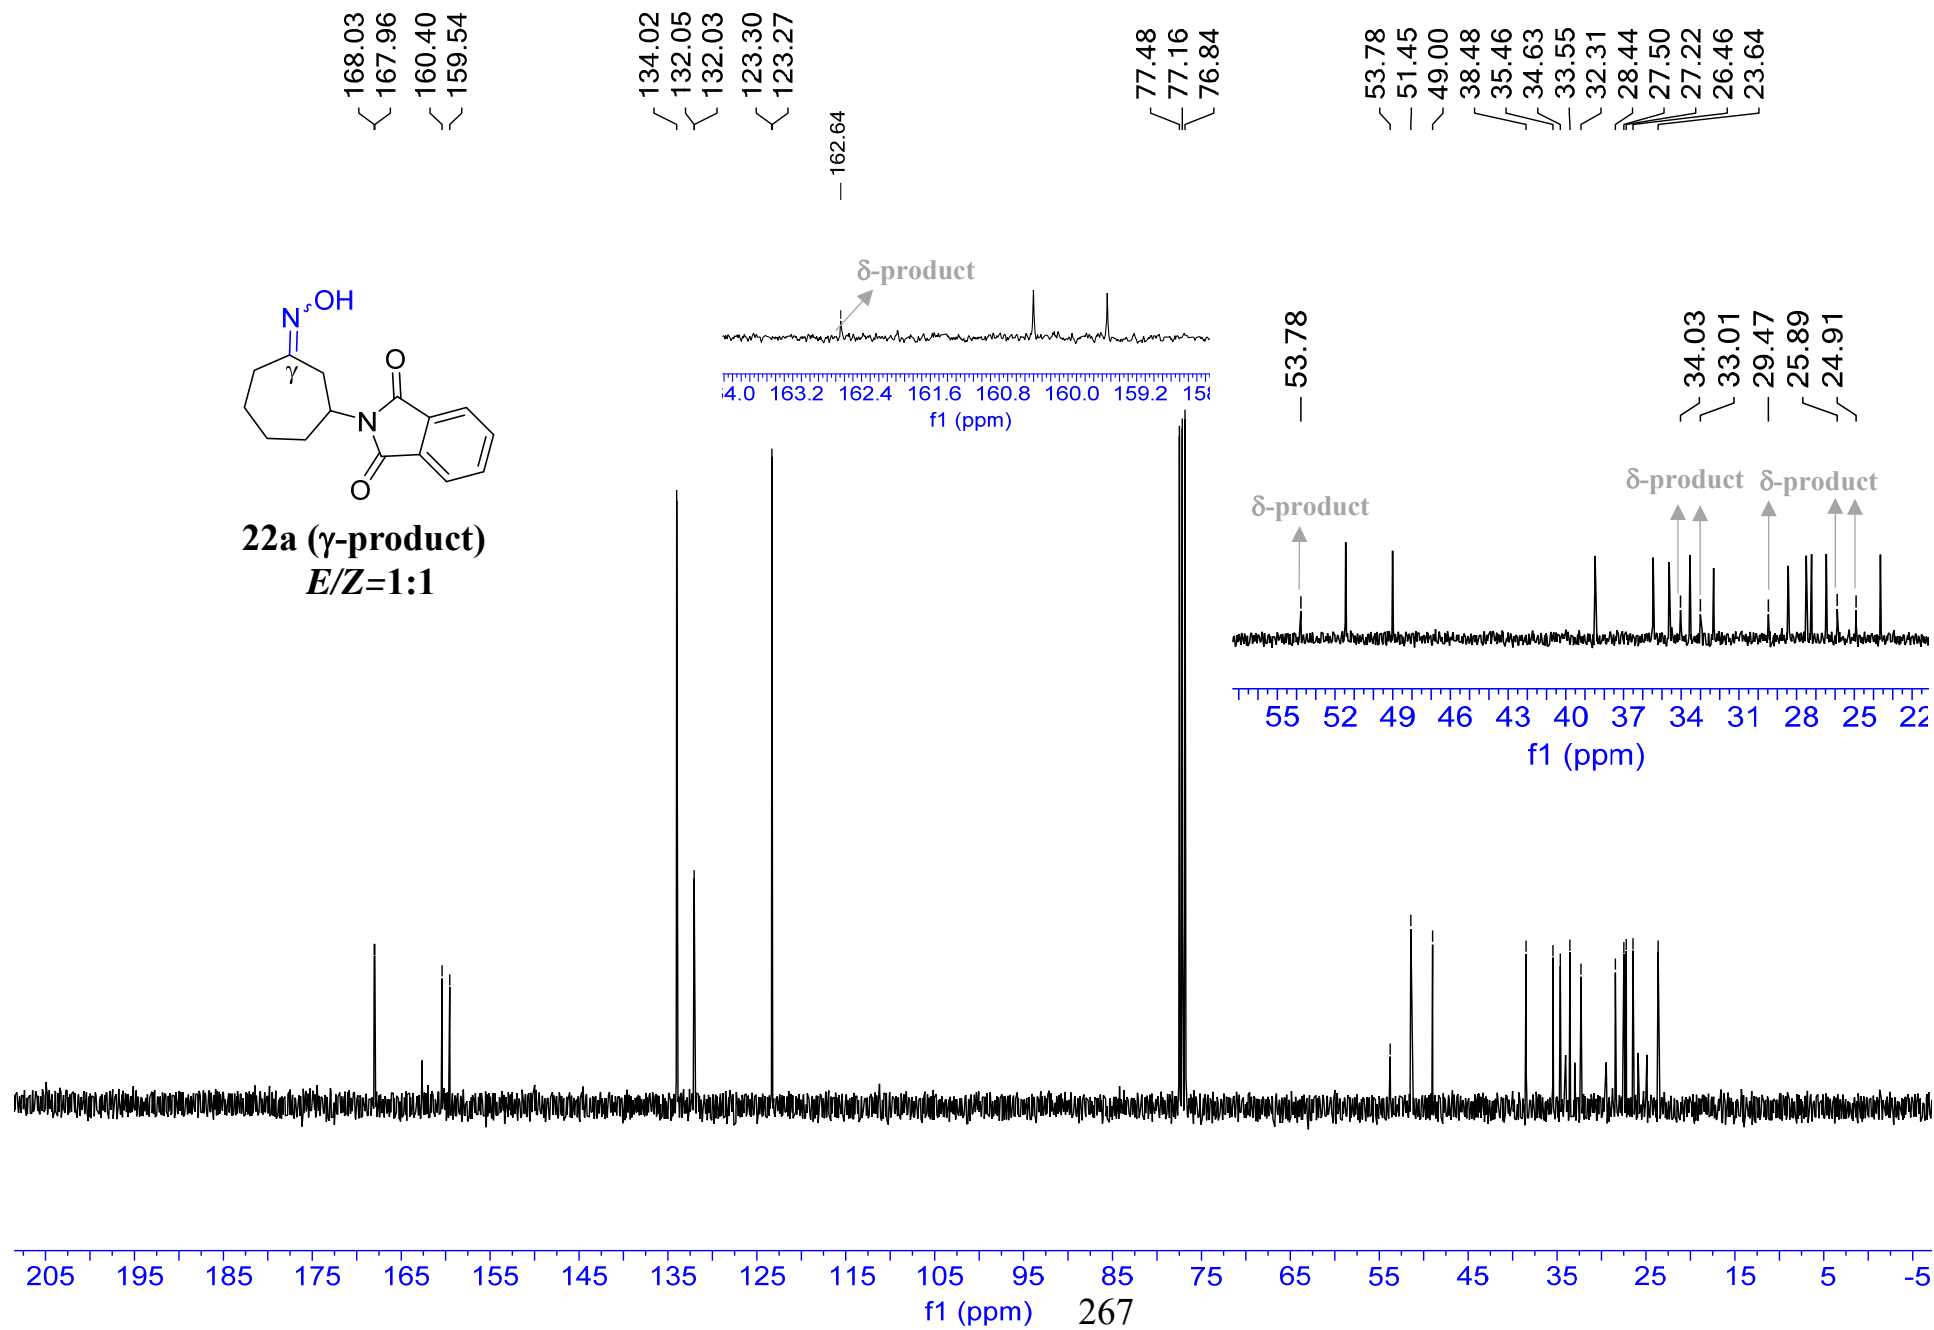

<sup>1</sup>H NMR, 400 MHz, CDCl<sub>3</sub>

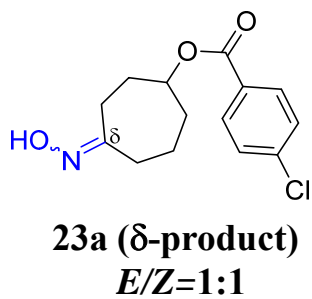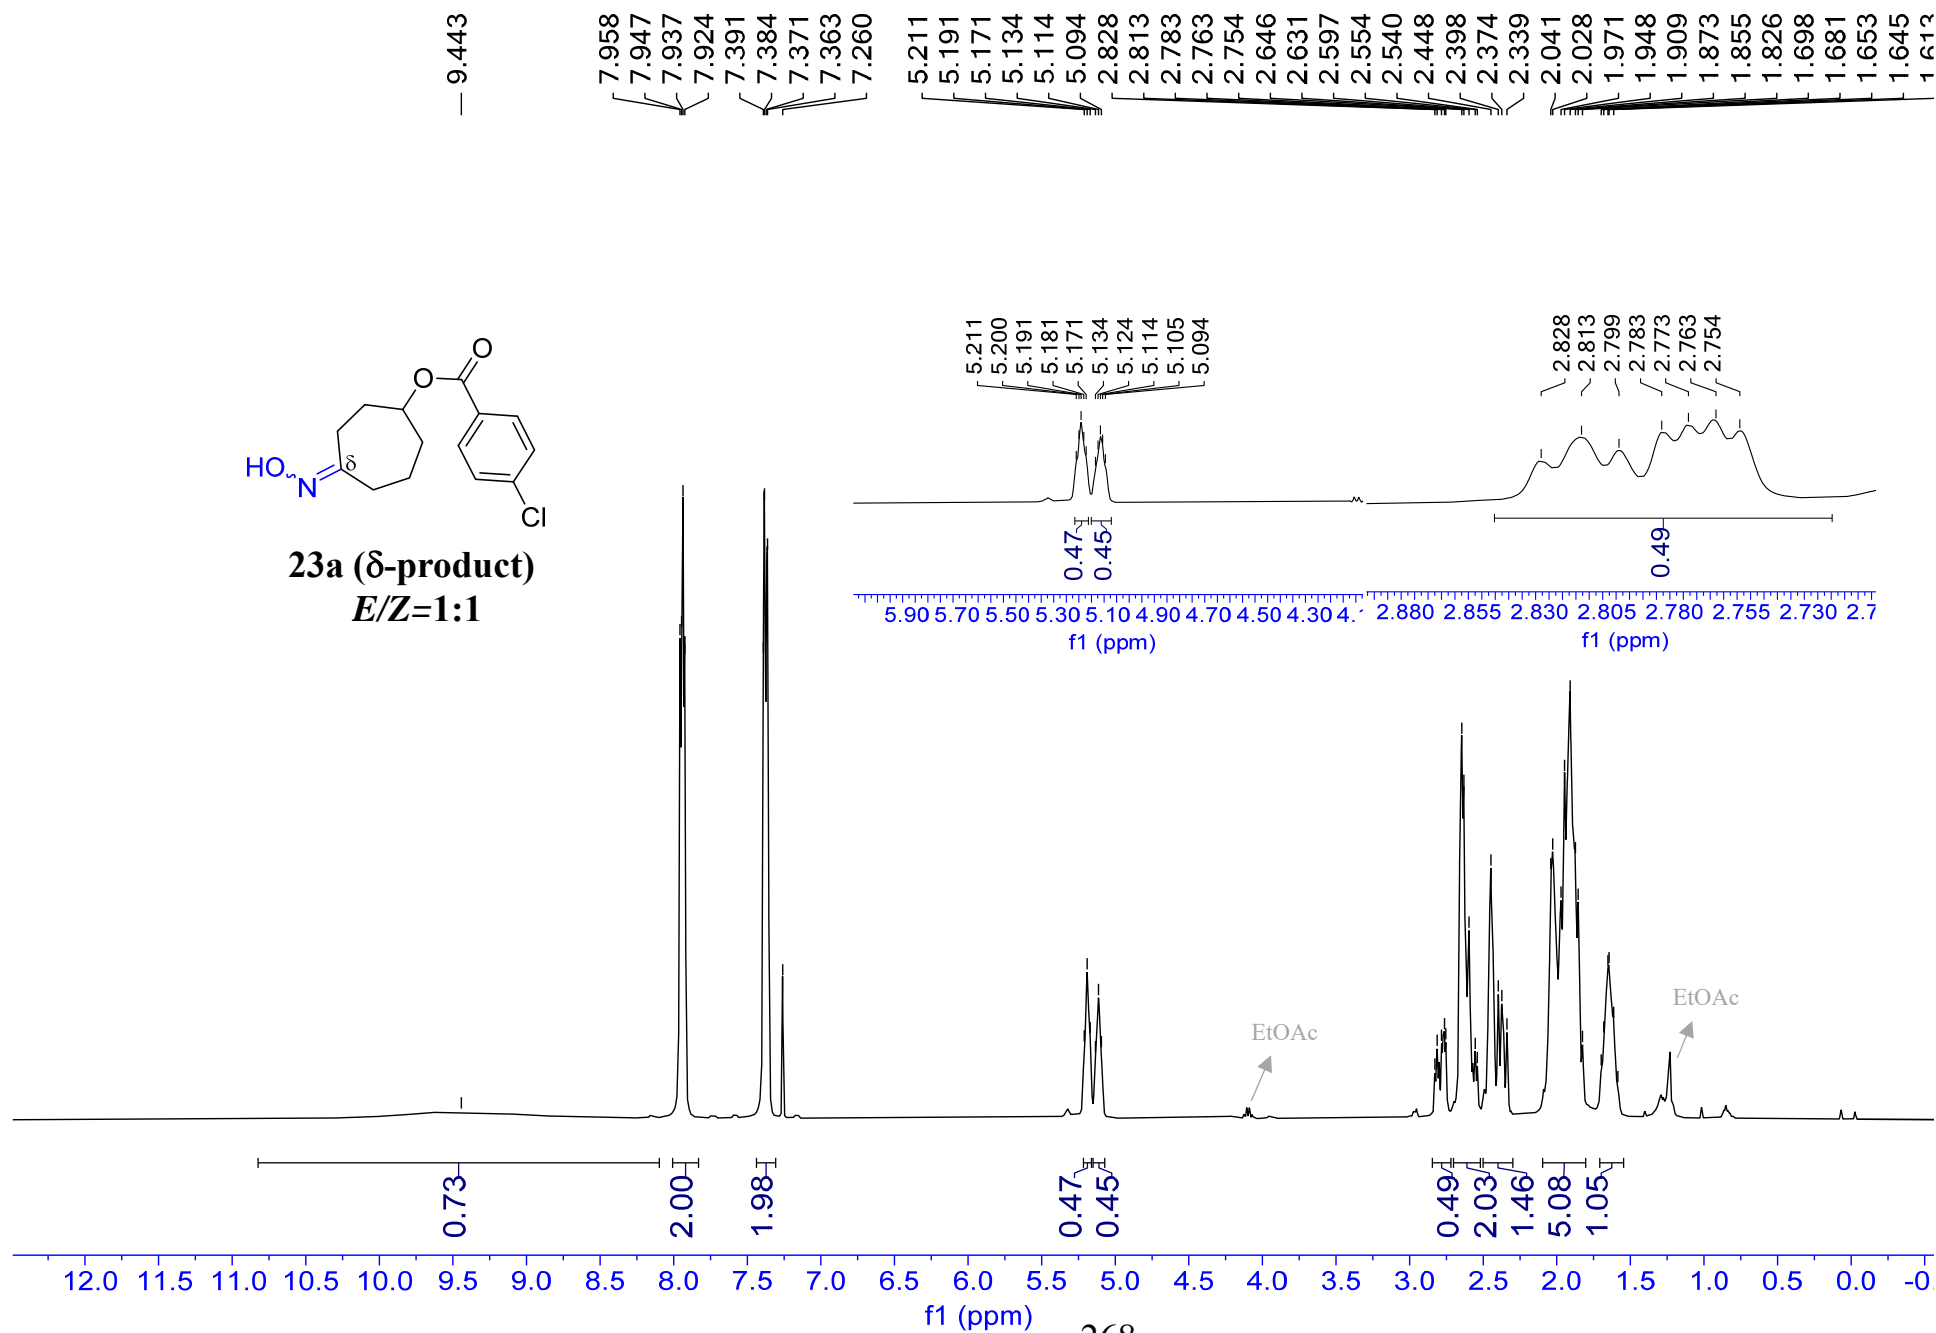



<sup>13</sup>C NMR 101 MHz, CDCl<sub>3</sub>

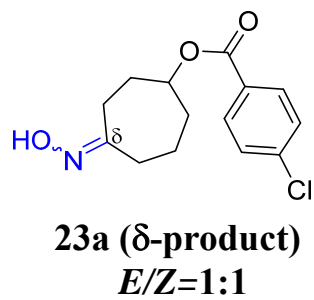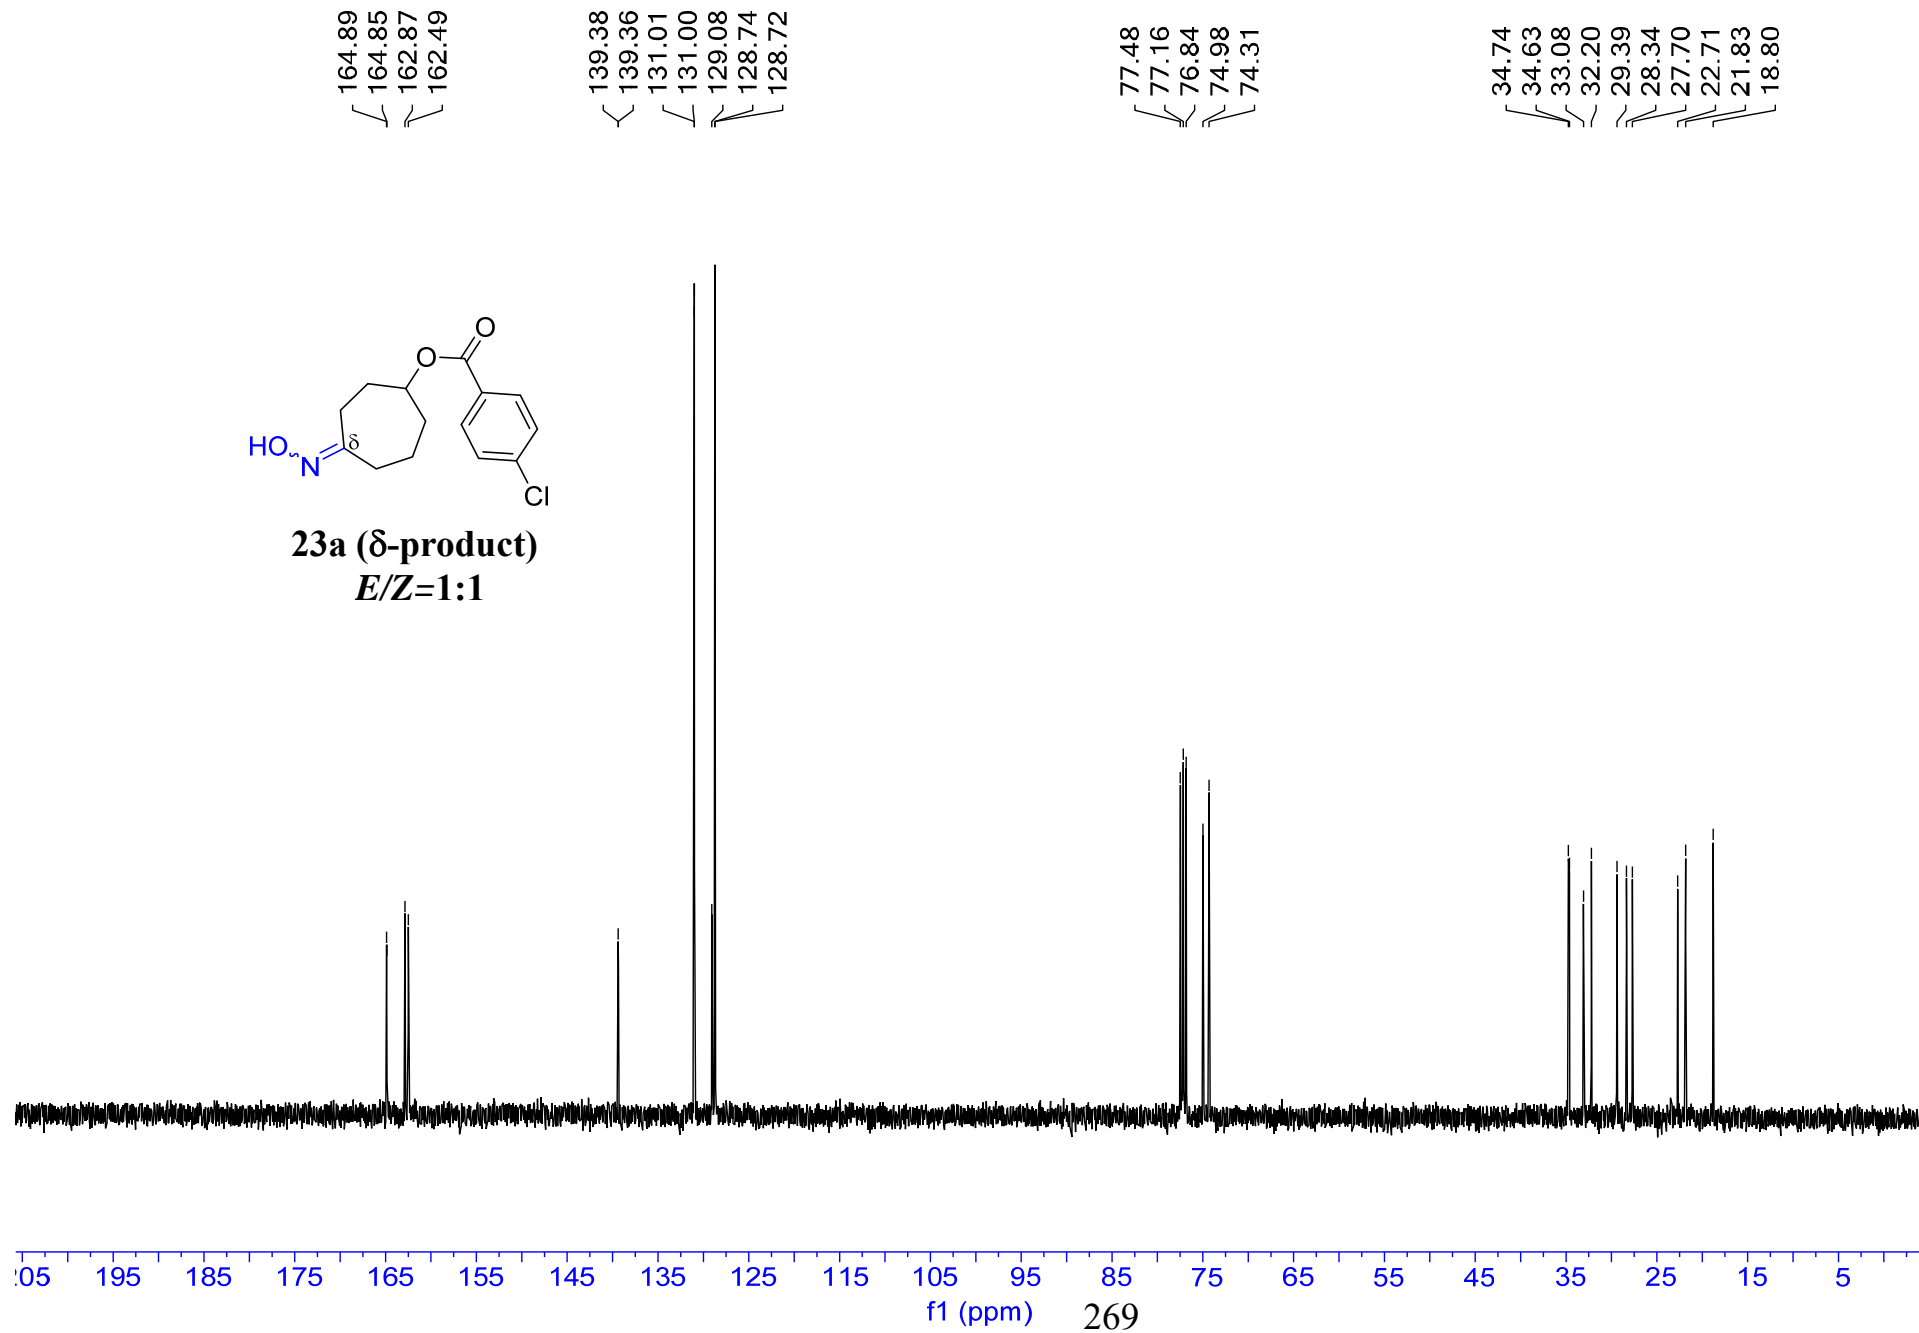

<sup>1</sup>H NMR, 400 MHz, CDCl<sub>3</sub>

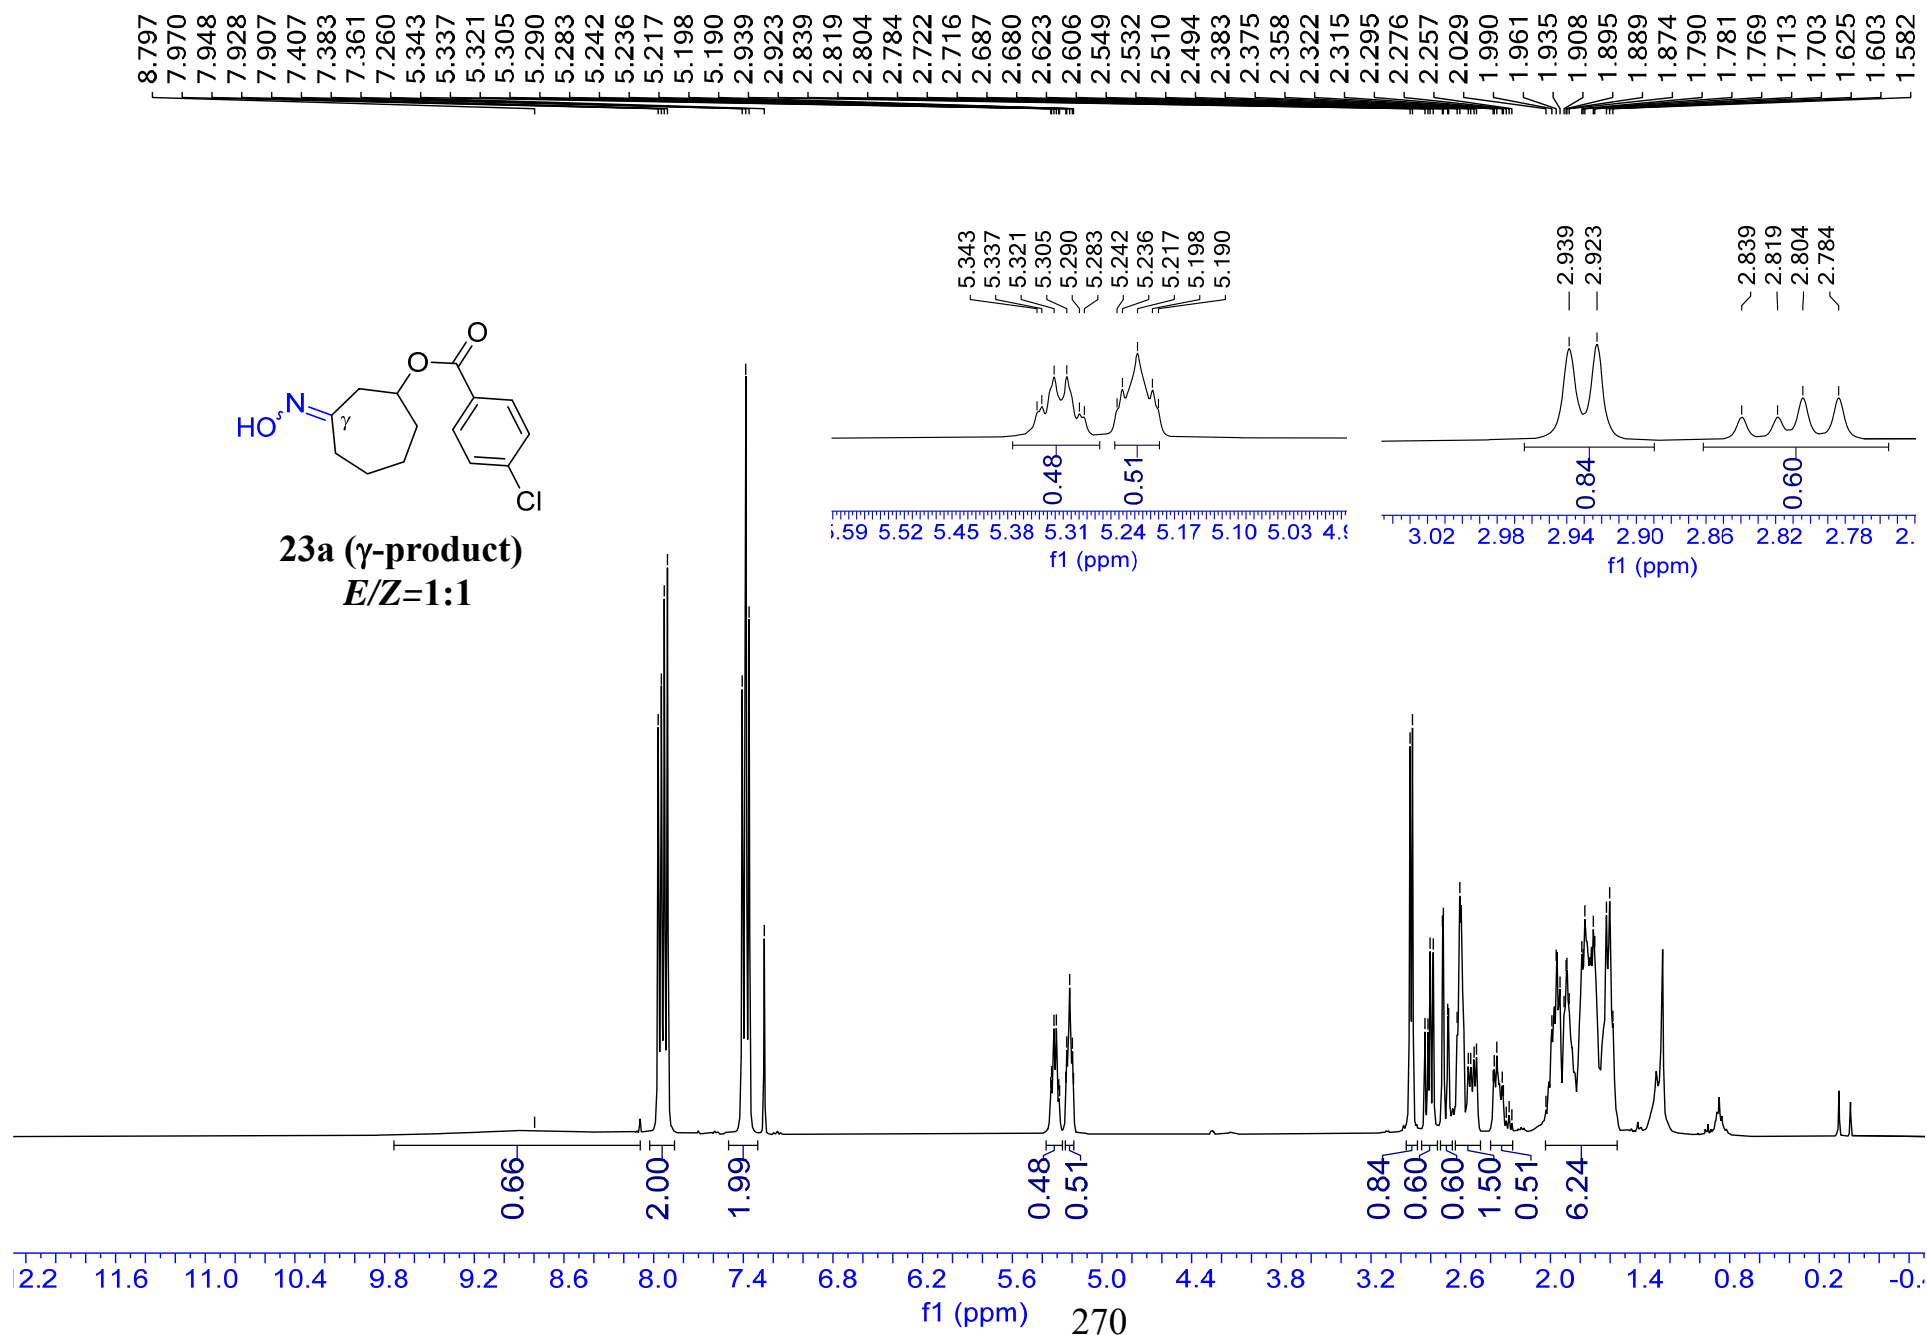

$^{13}\text{C}$  NMR 101 MHz,  $\text{CDCl}_3$

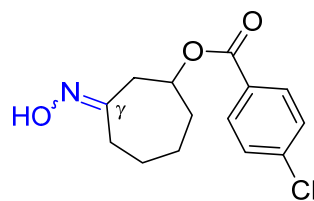

**23a ( $\gamma$ -product)**  
 **$E/Z=1:1$**

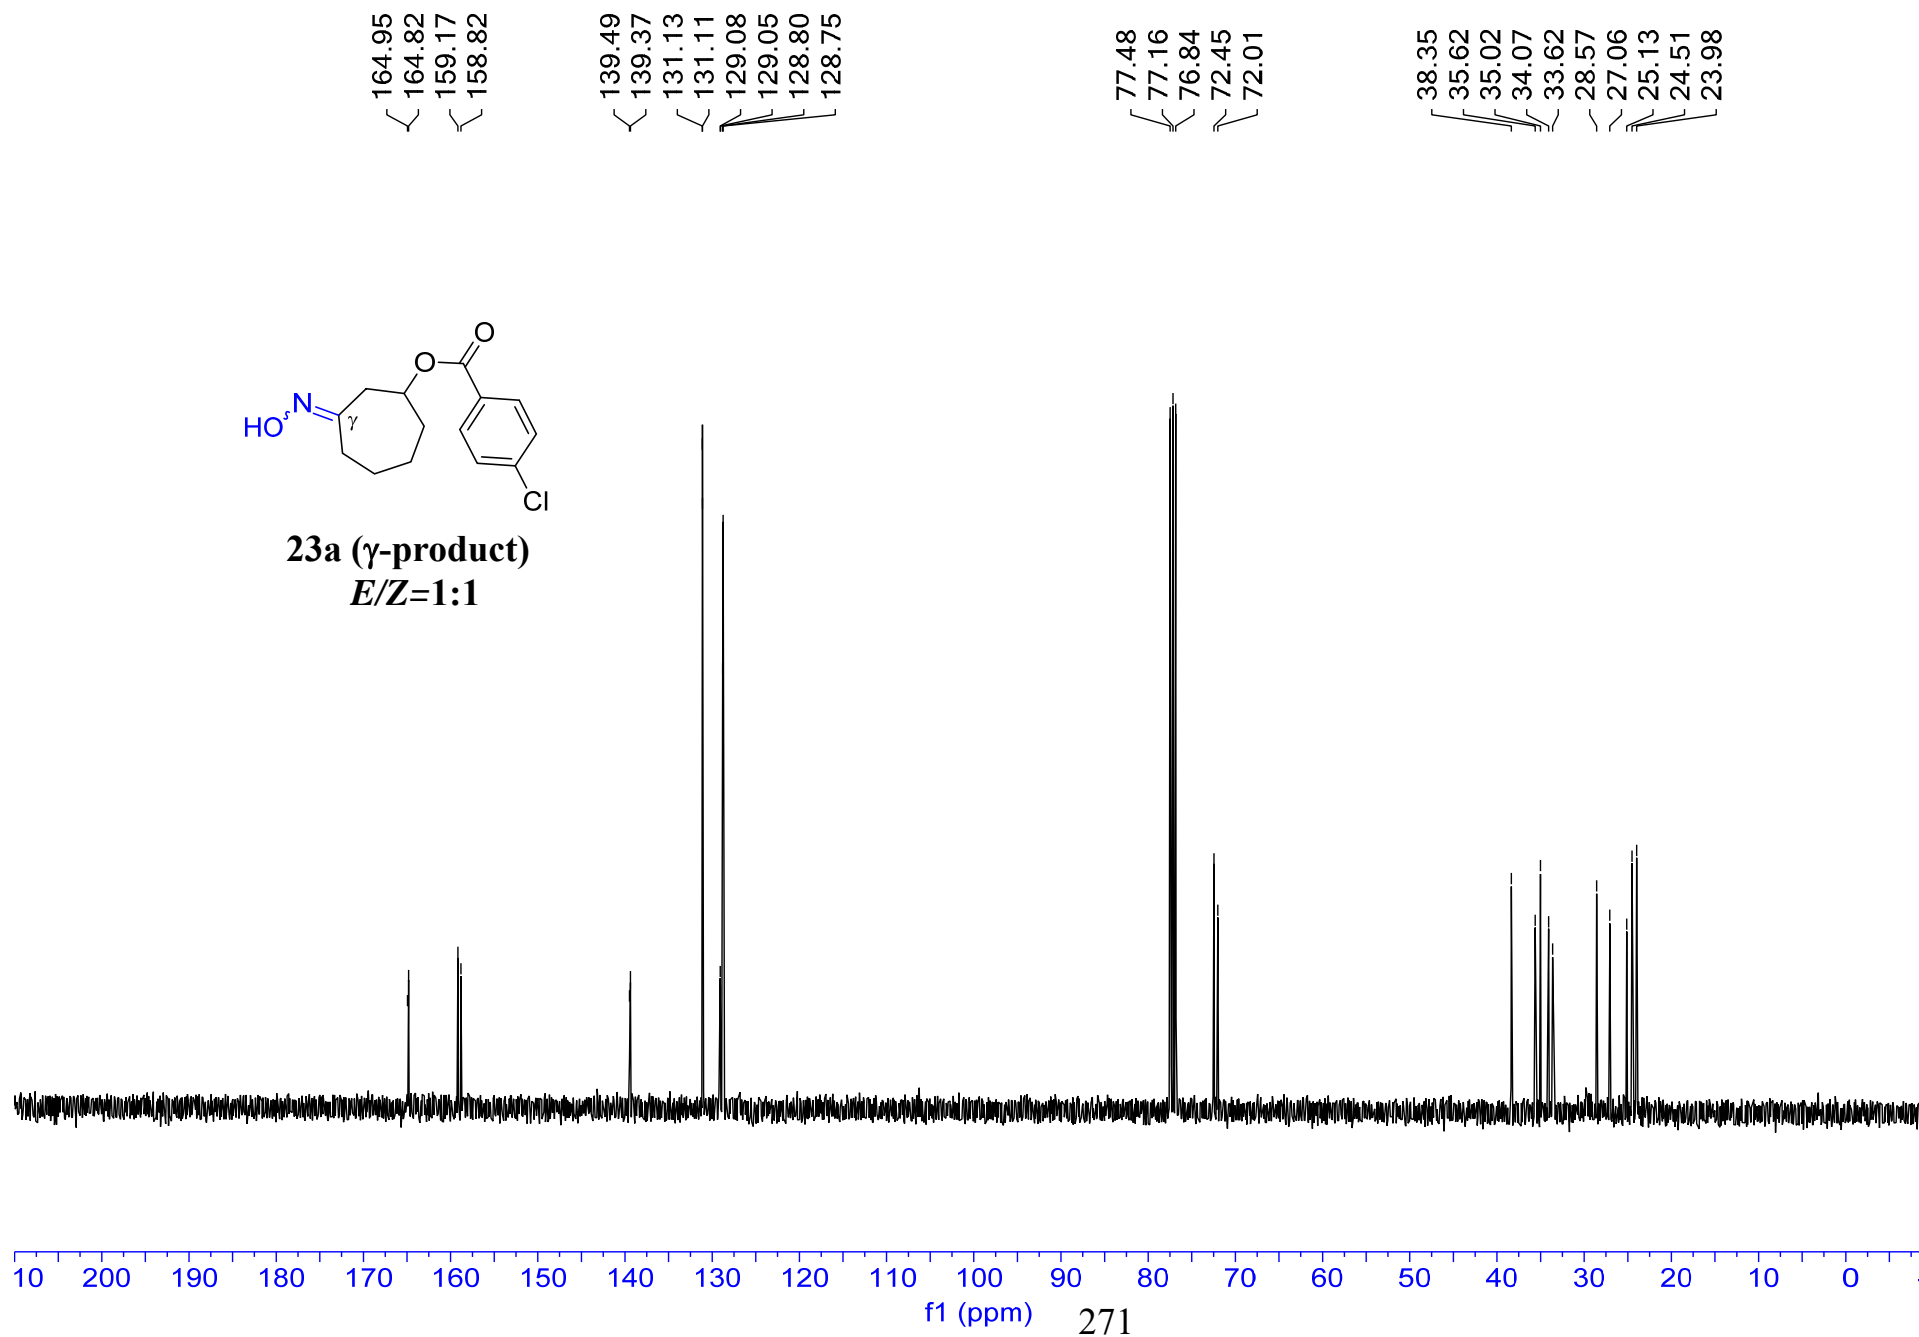

$^1\text{H}$  NMR, 400 MHz,  $\text{CDCl}_3$

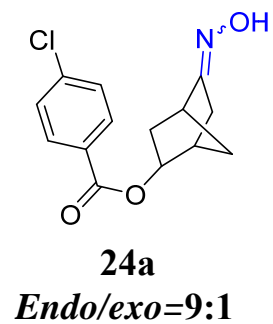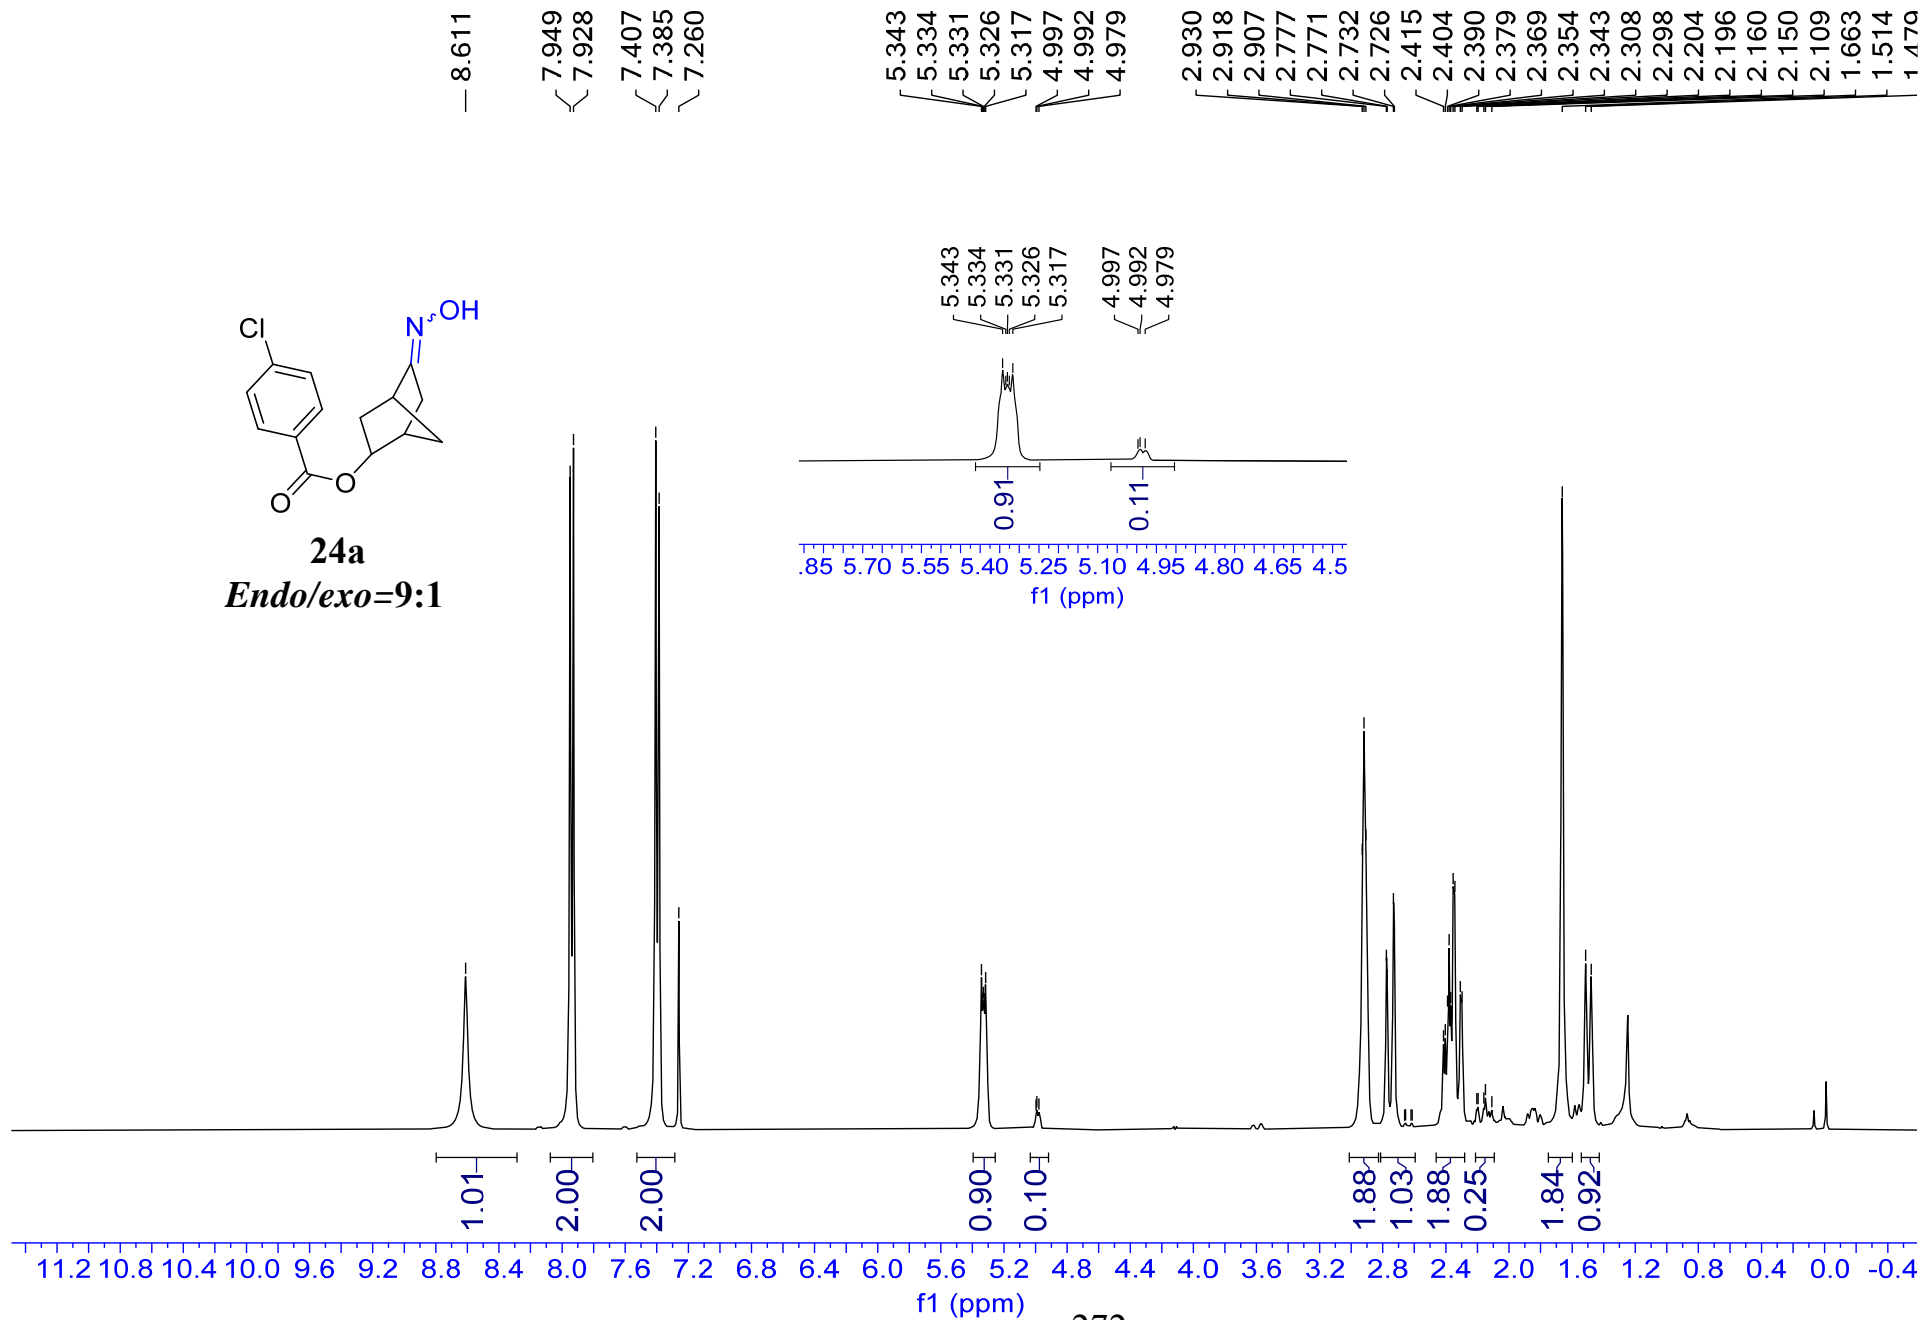

<sup>13</sup>C NMR 101 MHz, CDCl<sub>3</sub>

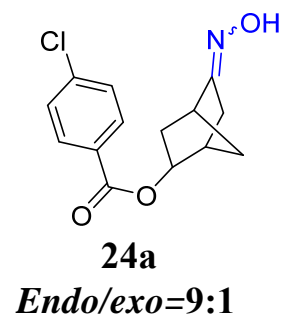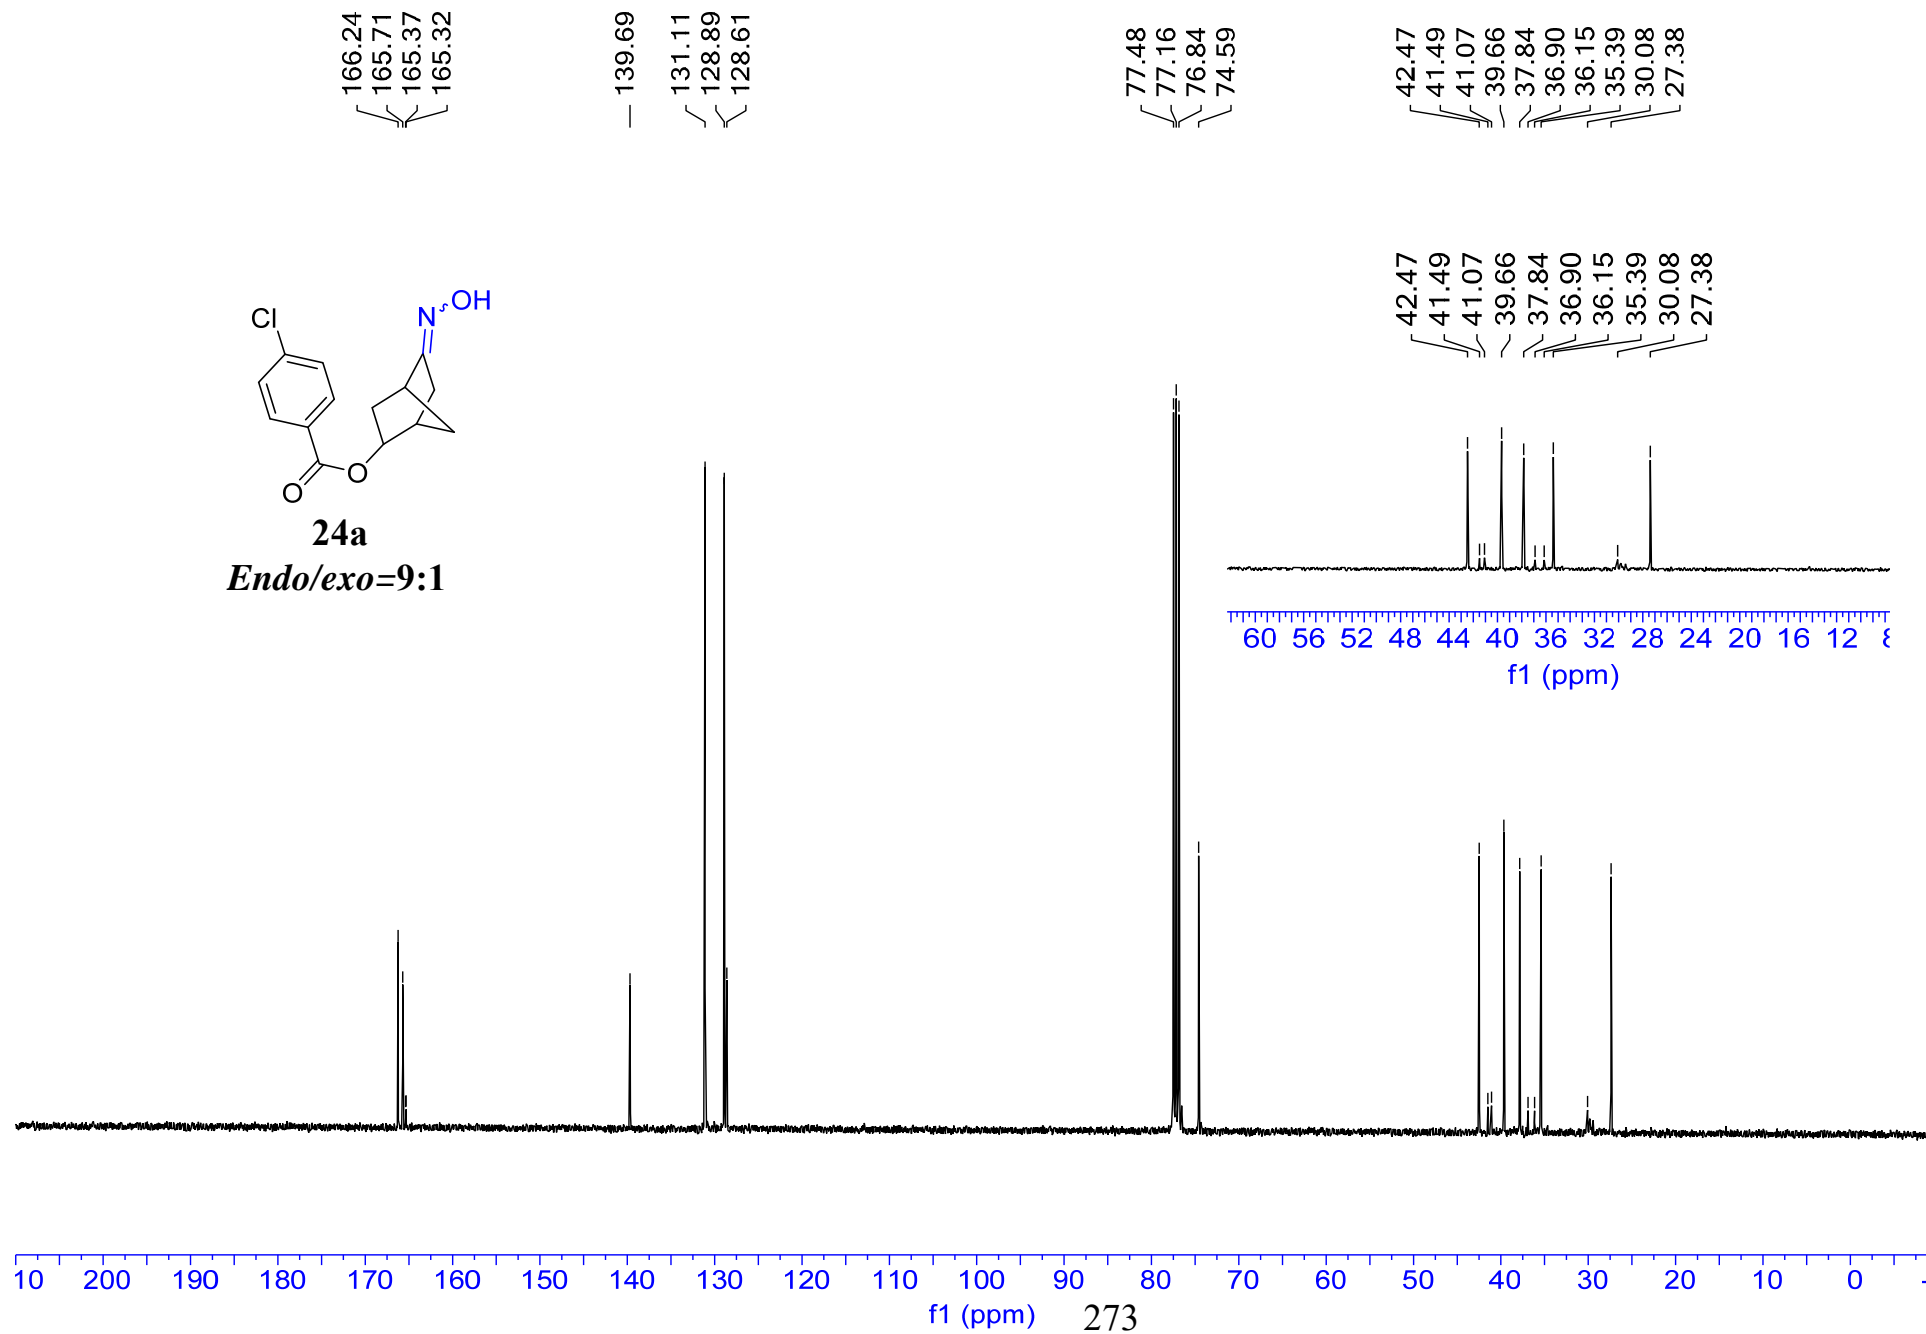

<sup>1</sup>H NMR, 400 MHz, CDCl<sub>3</sub>

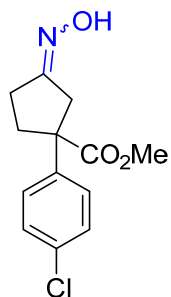

**25a**  
*E/Z*=1.2:1

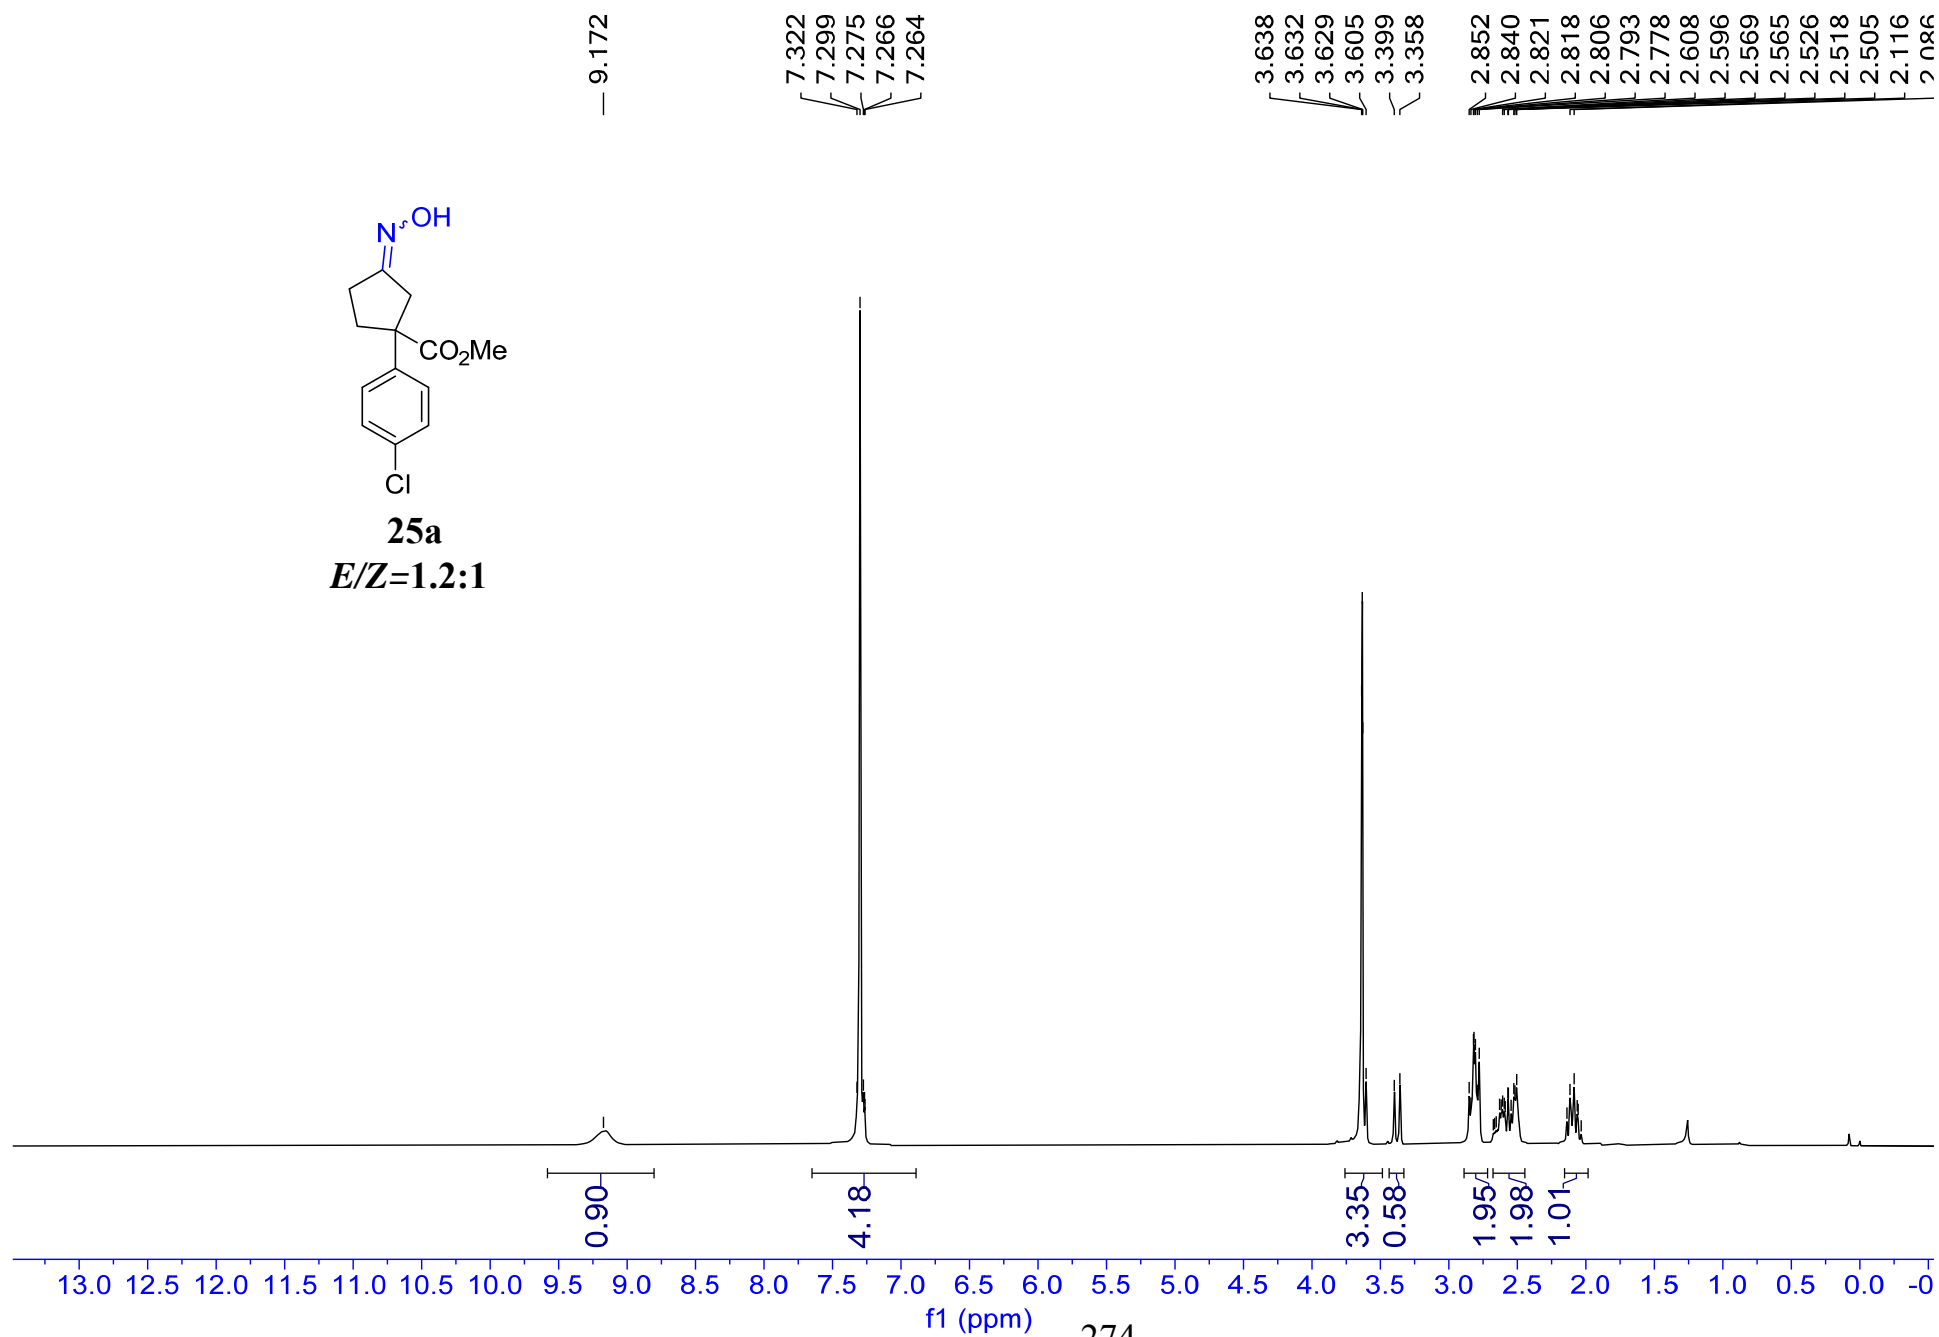

<sup>13</sup>C NMR 101 MHz, CDCl<sub>3</sub>

174.70  
174.46

163.48  
163.14

140.10  
139.60  
133.53  
133.46  
128.86  
128.83  
128.14

77.48  
77.16  
76.84

56.27  
56.23  
52.99  
52.96

40.16  
37.37  
34.52  
34.07  
28.90  
25.91



**25a**  
*E/Z*=1.2:1

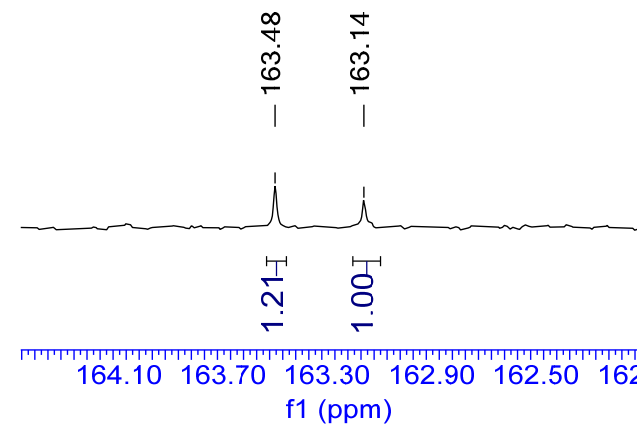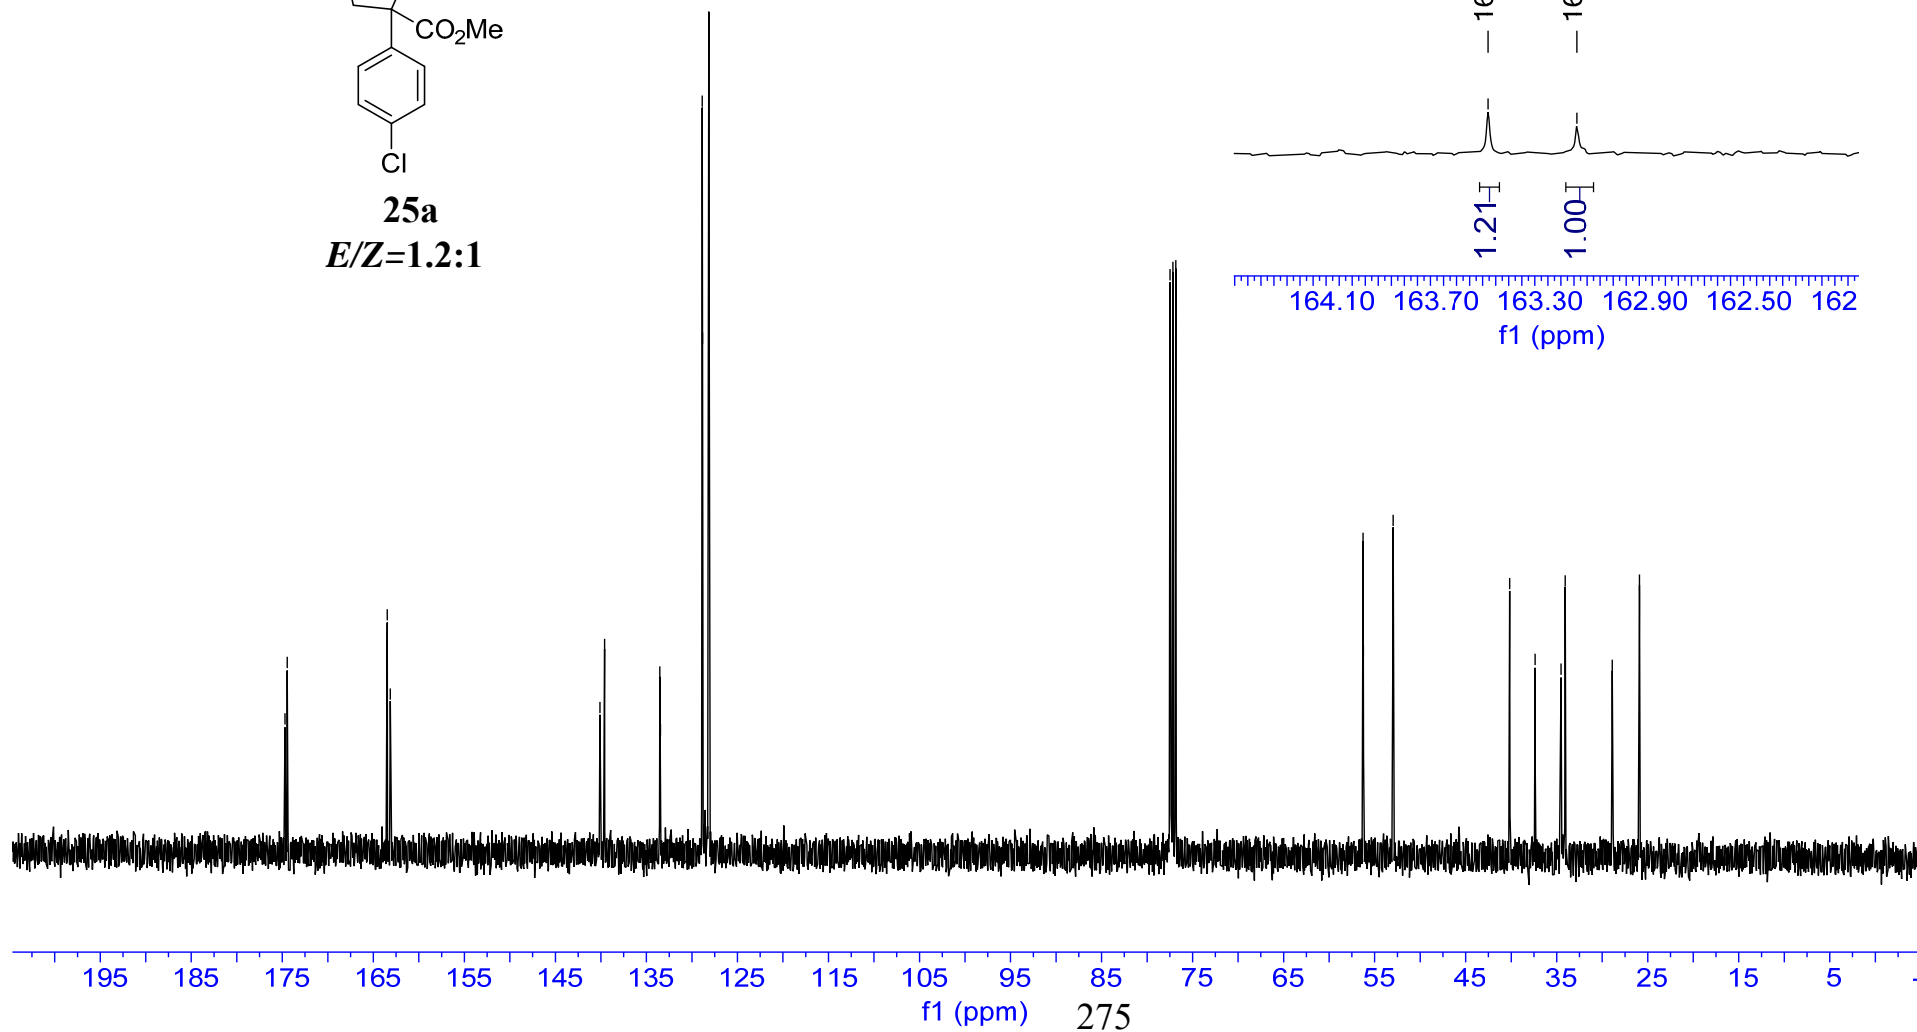

<sup>1</sup>H NMR, 400 MHz, CDCl<sub>3</sub>

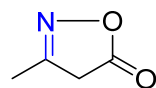

**26a'**

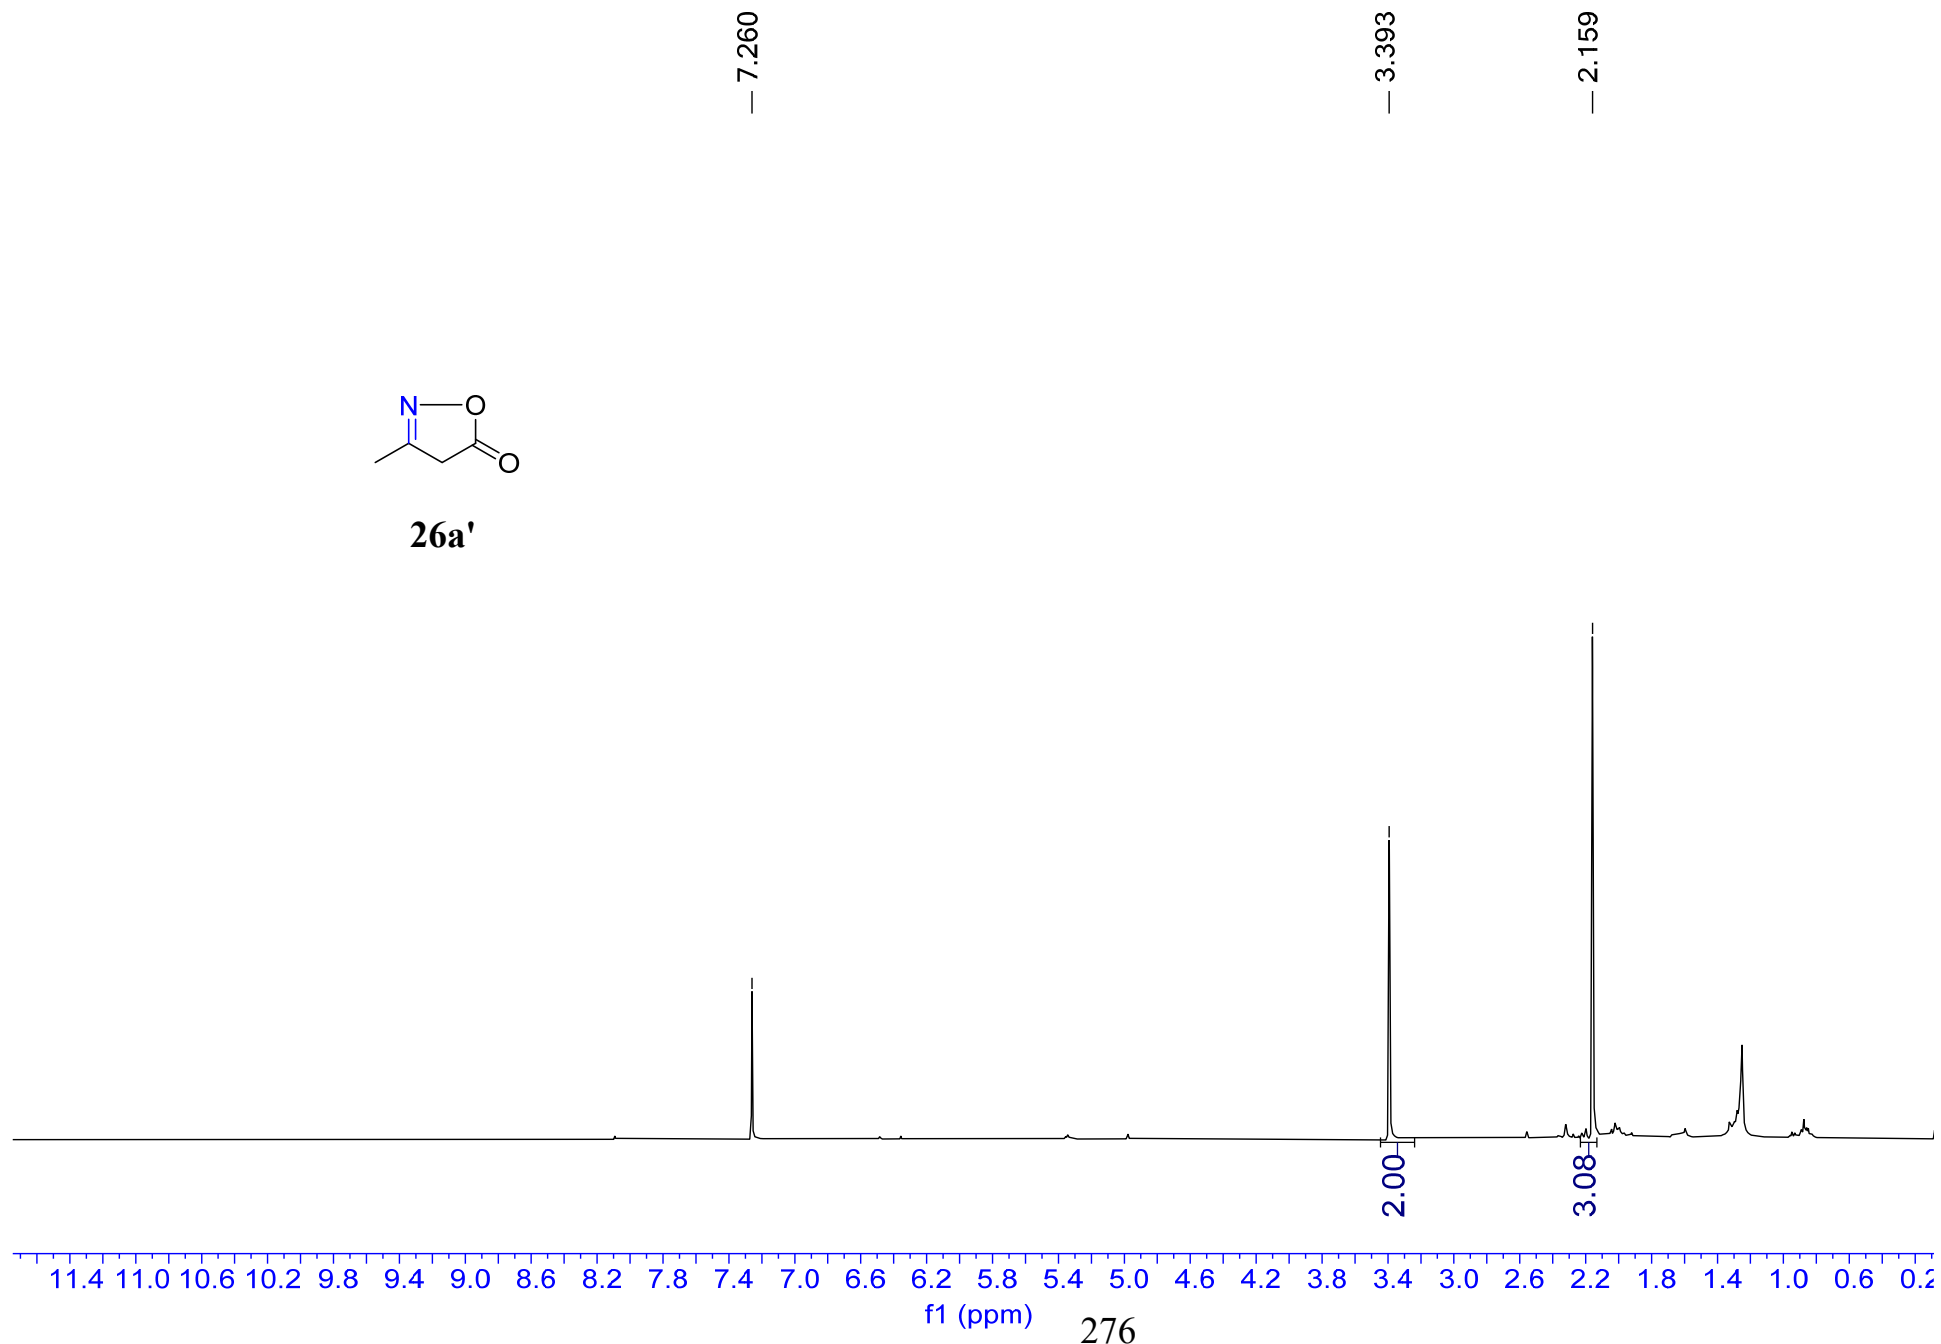



$^{13}\text{C}$  NMR 101 MHz,  $\text{CDCl}_3$



**26a'**

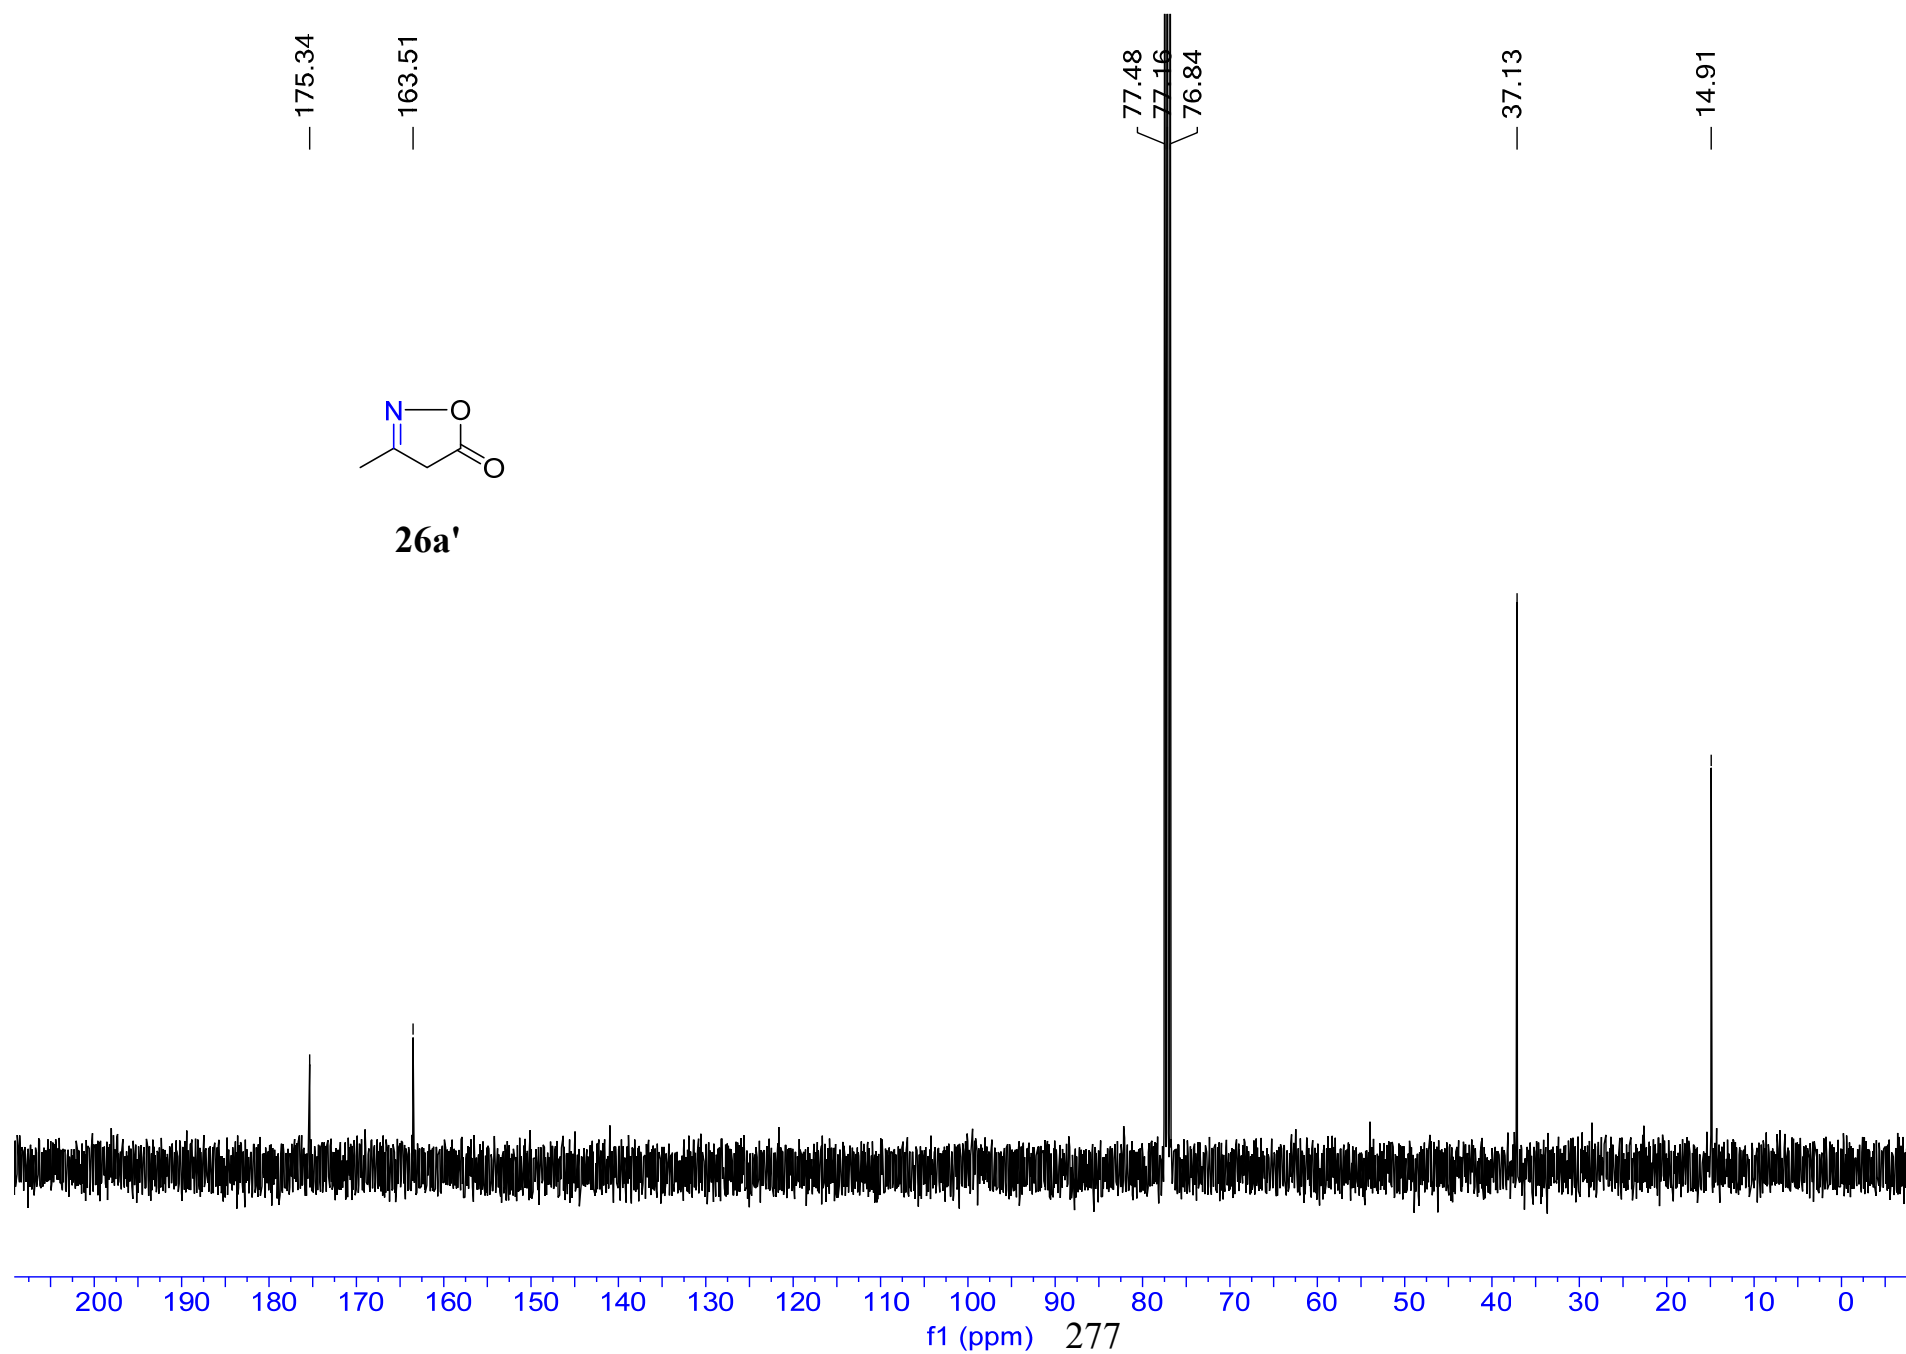

<sup>1</sup>H NMR, 400 MHz, CDCl<sub>3</sub>

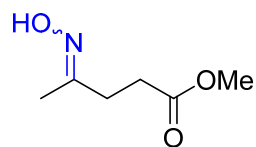

— 8.142

— 7.260

3.689  
3.680  
2.678  
2.656  
2.653  
2.640  
2.636  
2.594  
2.590  
2.577  
2.565  
2.551  
2.550  
2.548  
2.540  
2.536  
2.529  
1.894  
1.890

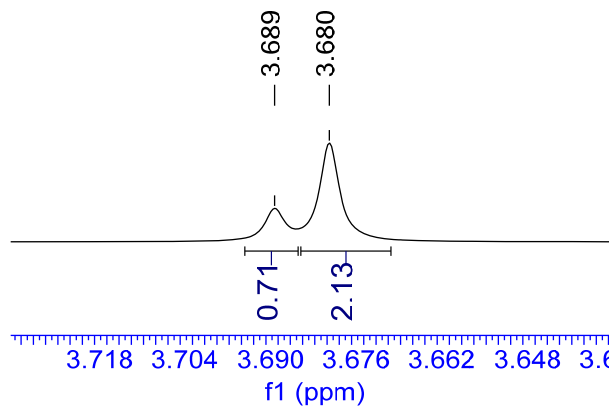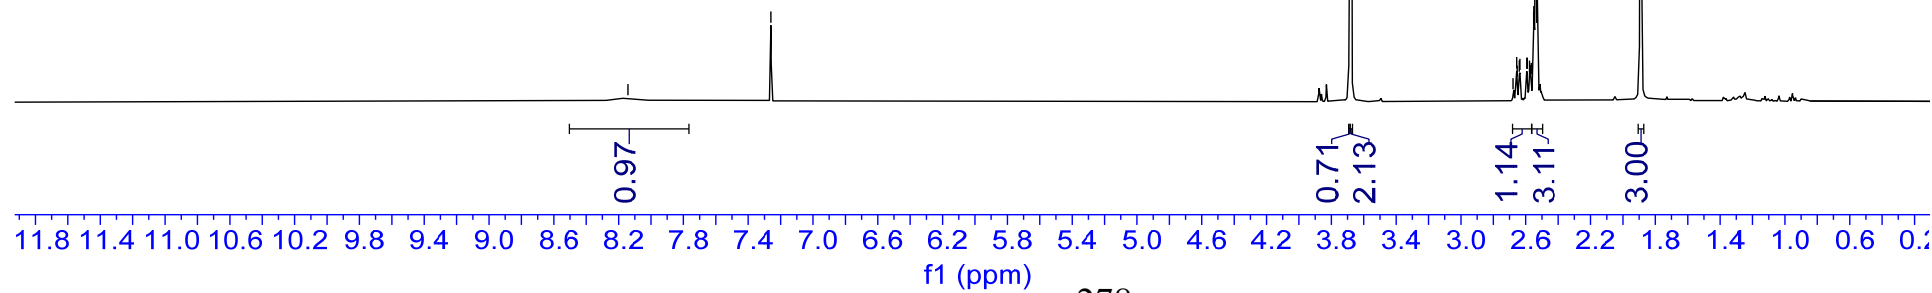

<sup>13</sup>C NMR 101 MHz, CDCl<sub>3</sub>



**27a**  
*E/Z*=3:1

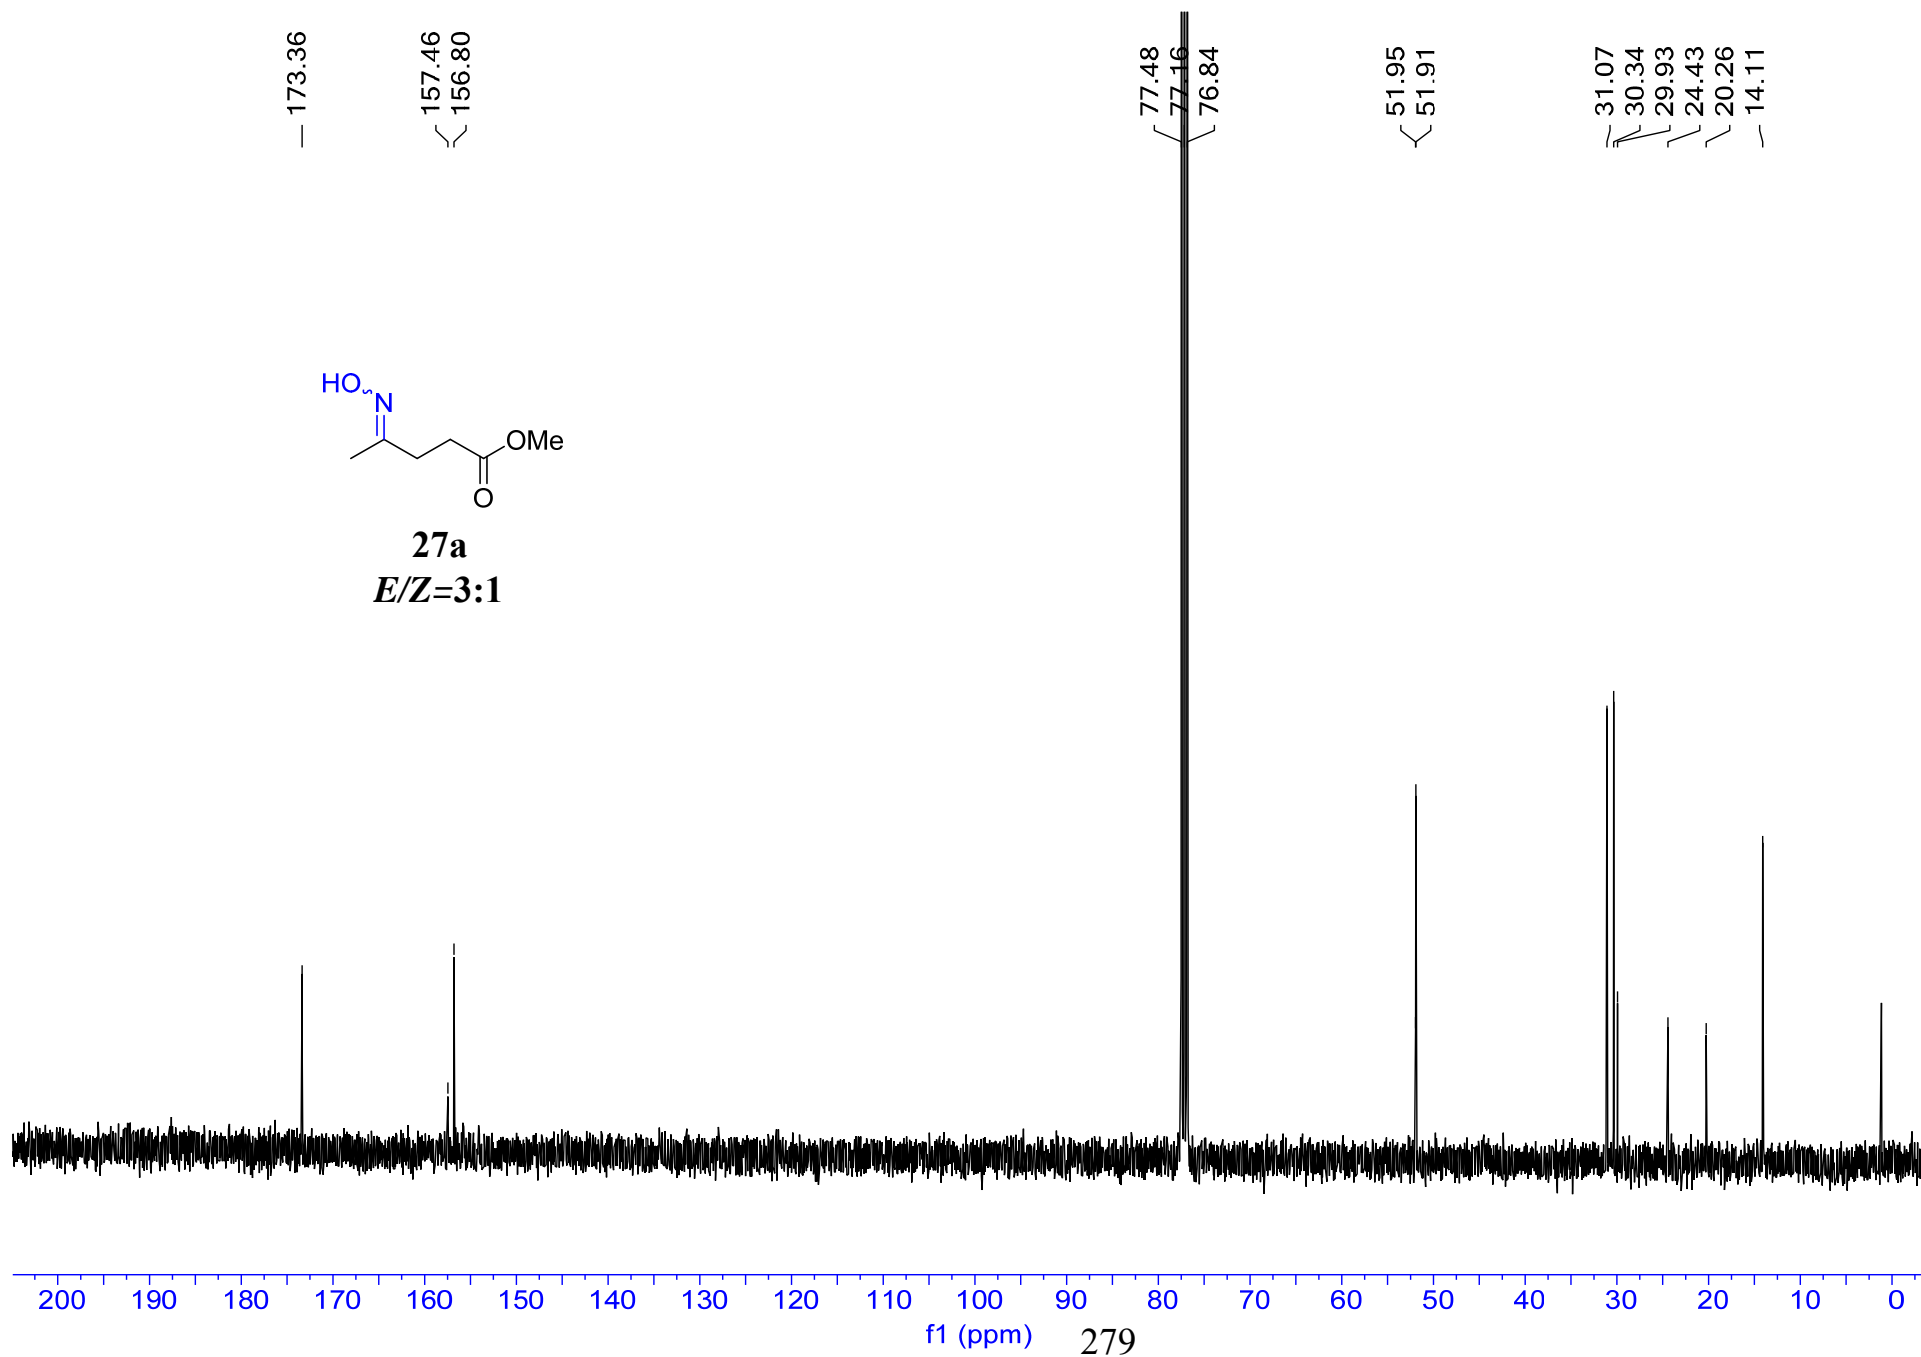

<sup>1</sup>H NMR, 400 MHz, CDCl<sub>3</sub>

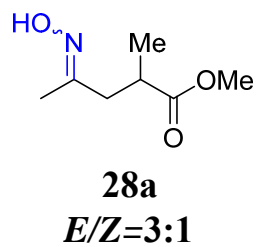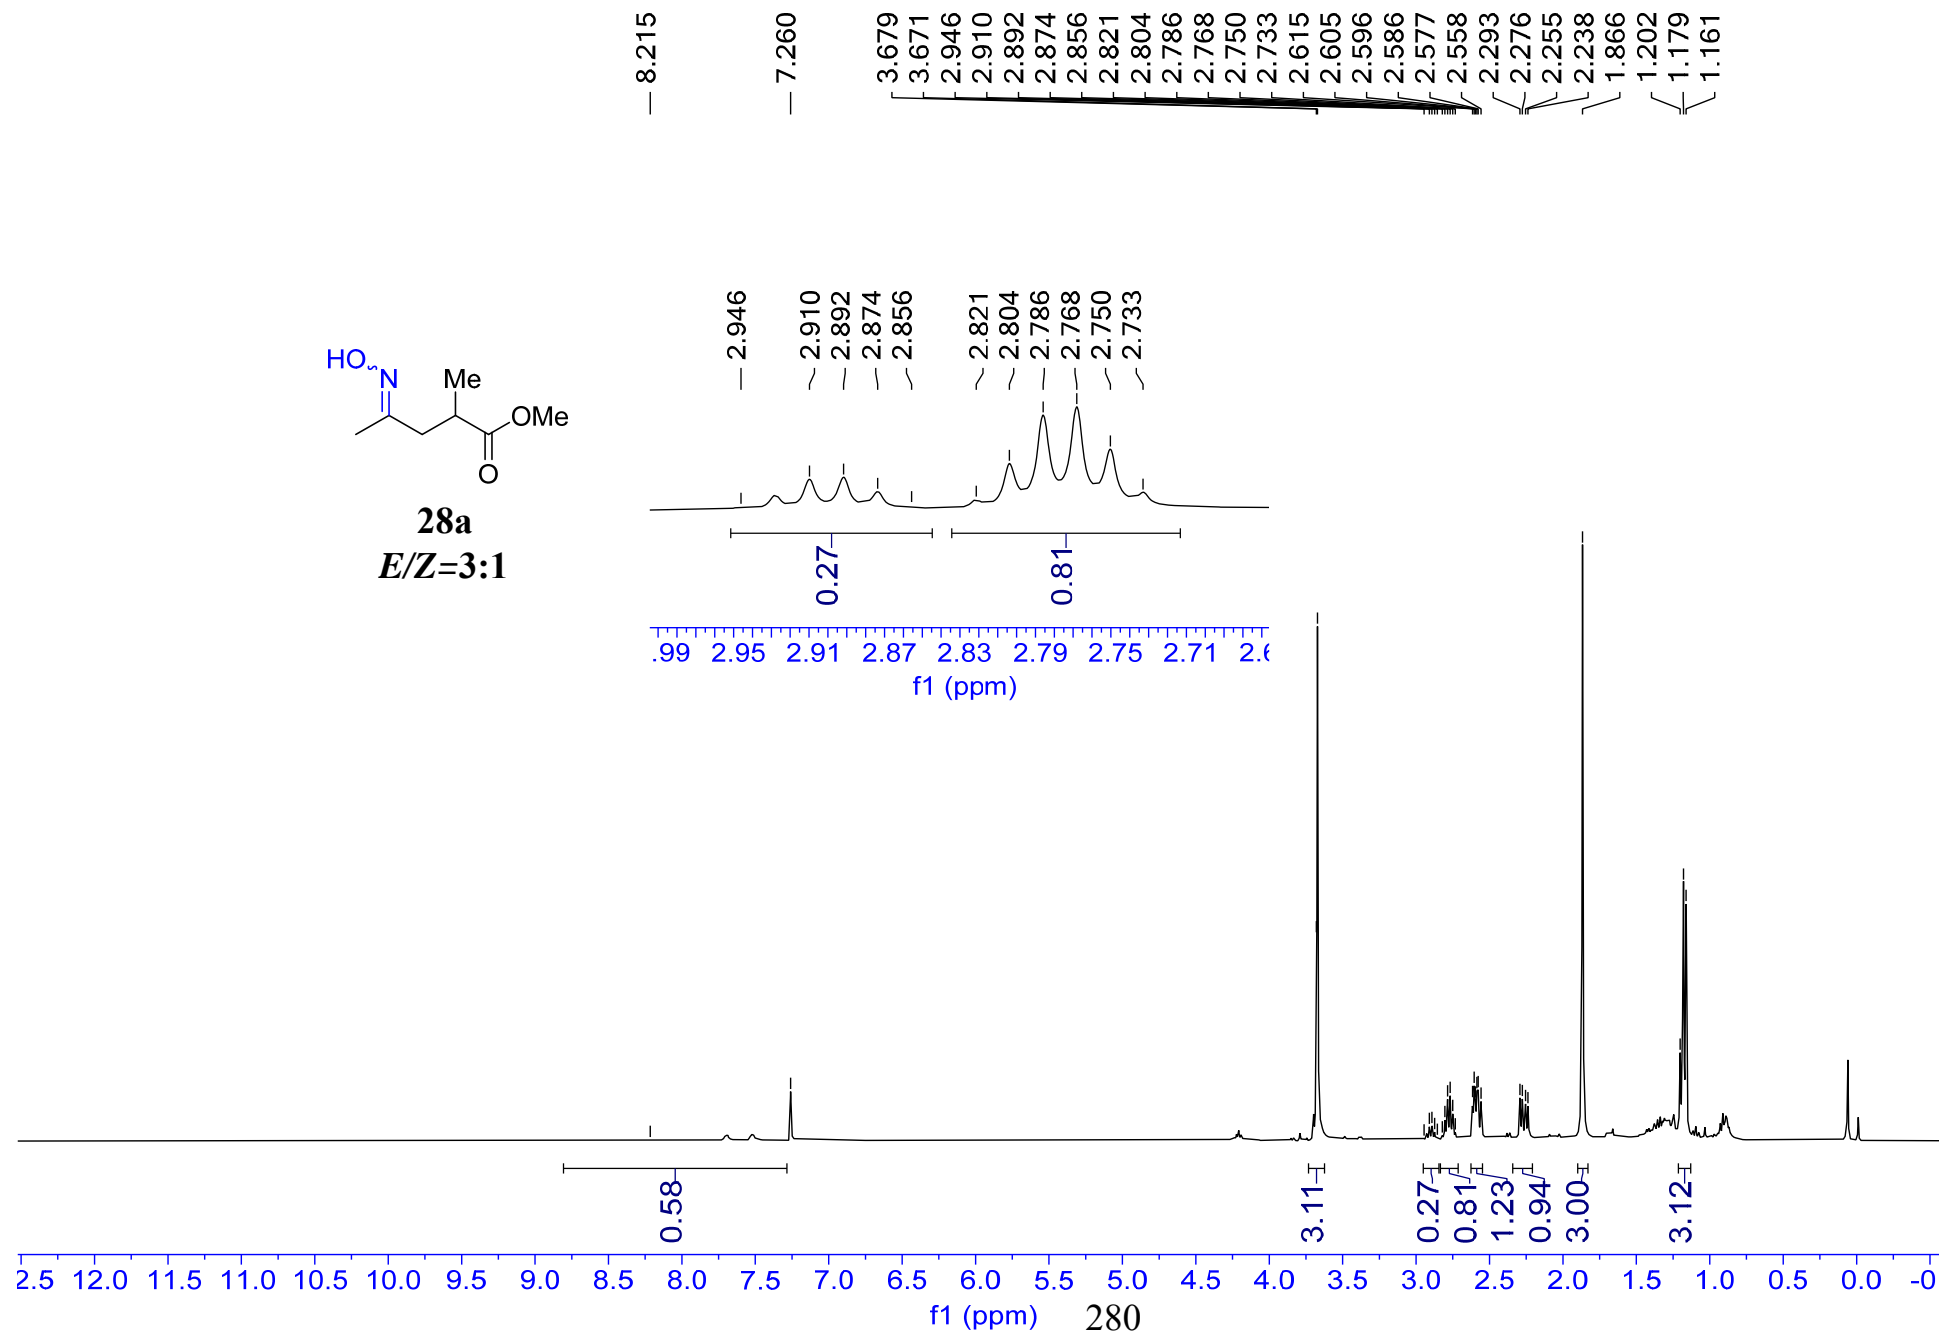

$^{13}\text{C}$  NMR 101 MHz,  $\text{CDCl}_3$

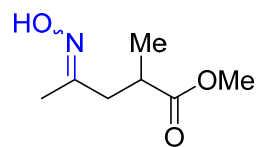

**28a**  
*E/Z*=3:1

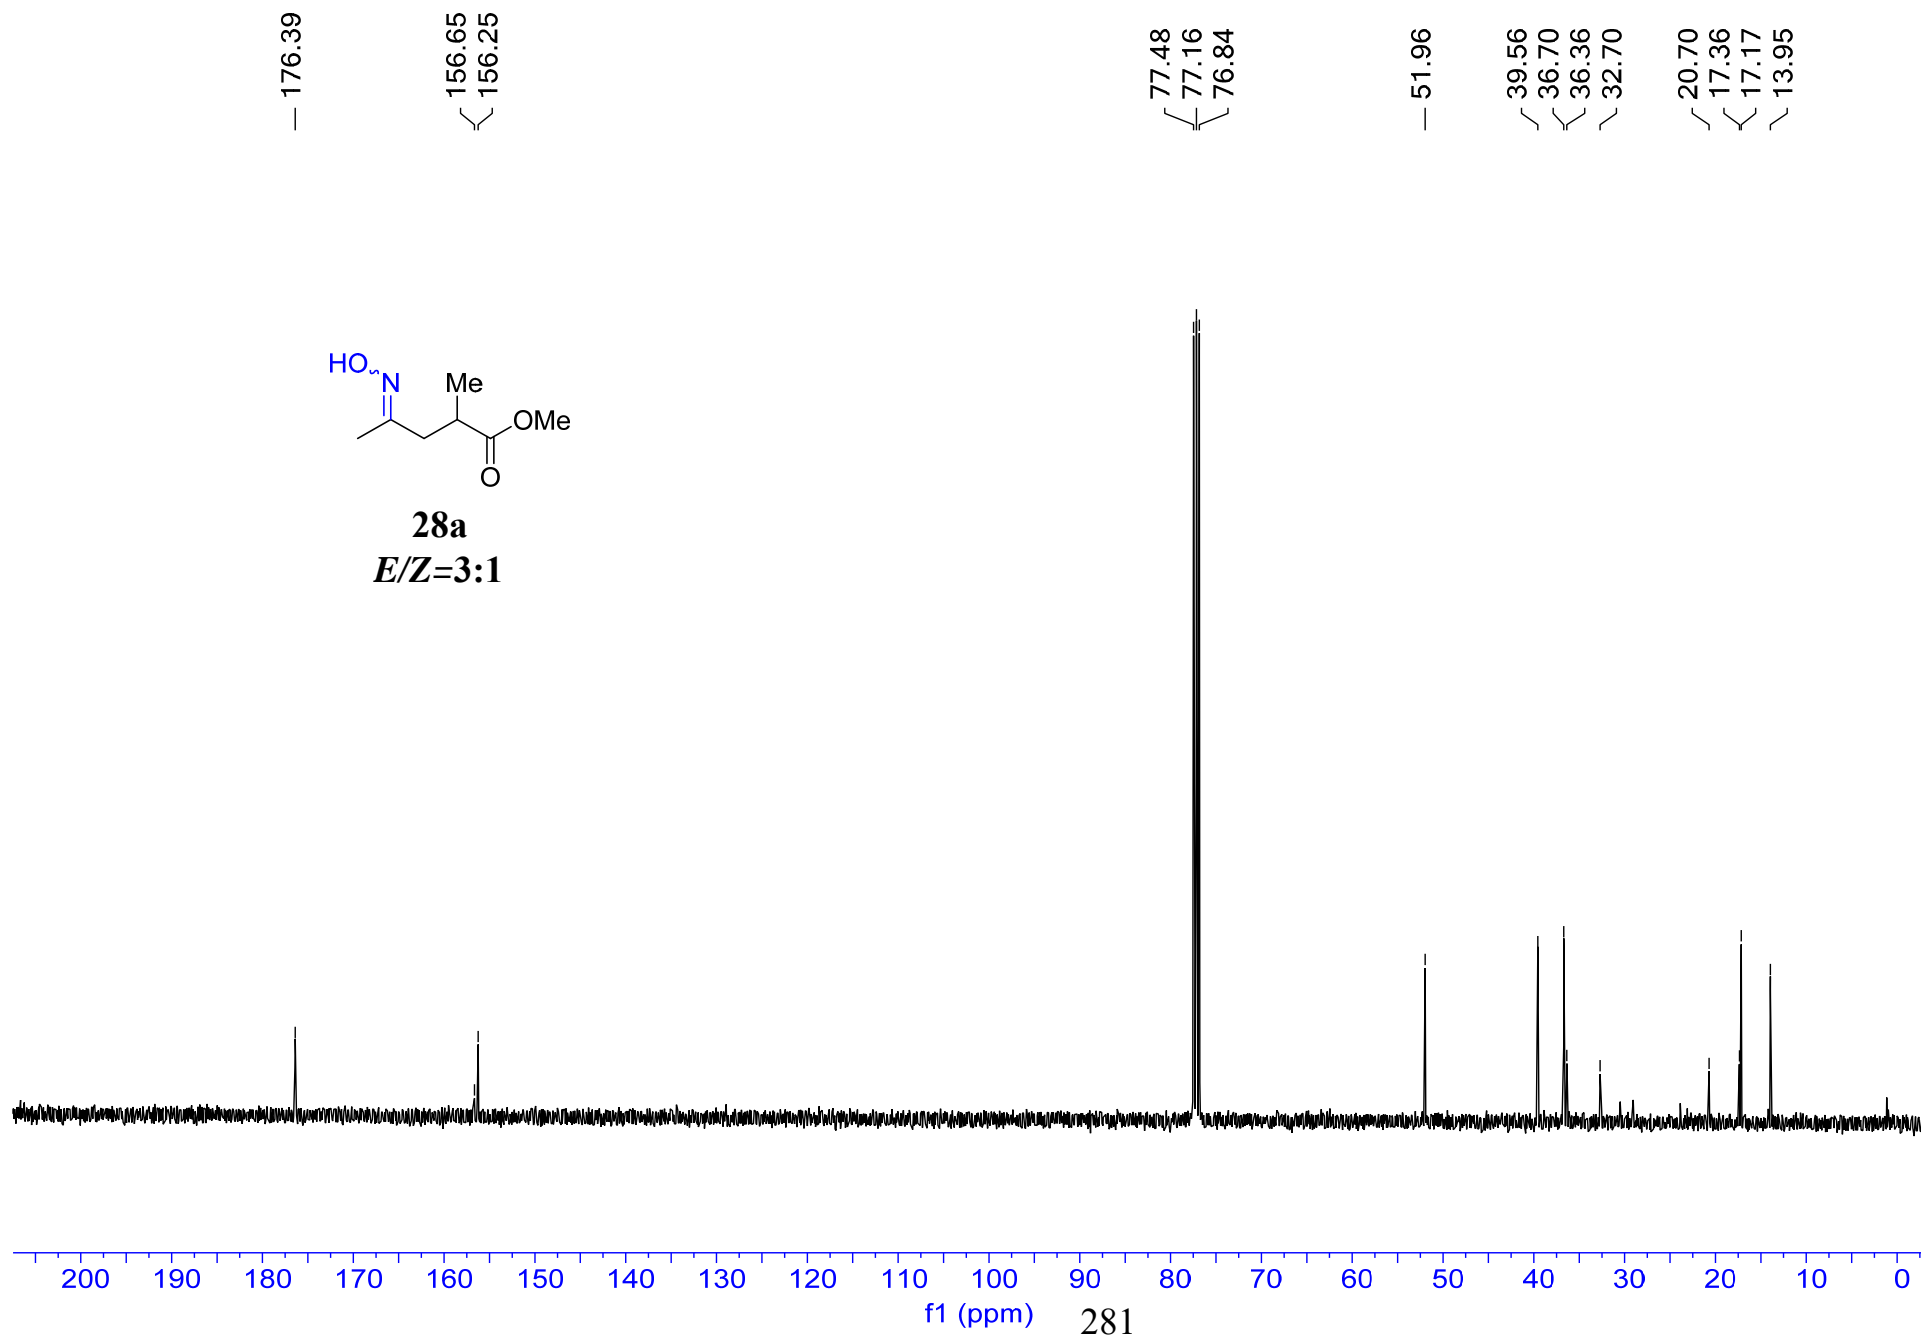

<sup>1</sup>H NMR, 400 MHz, CDCl<sub>3</sub>

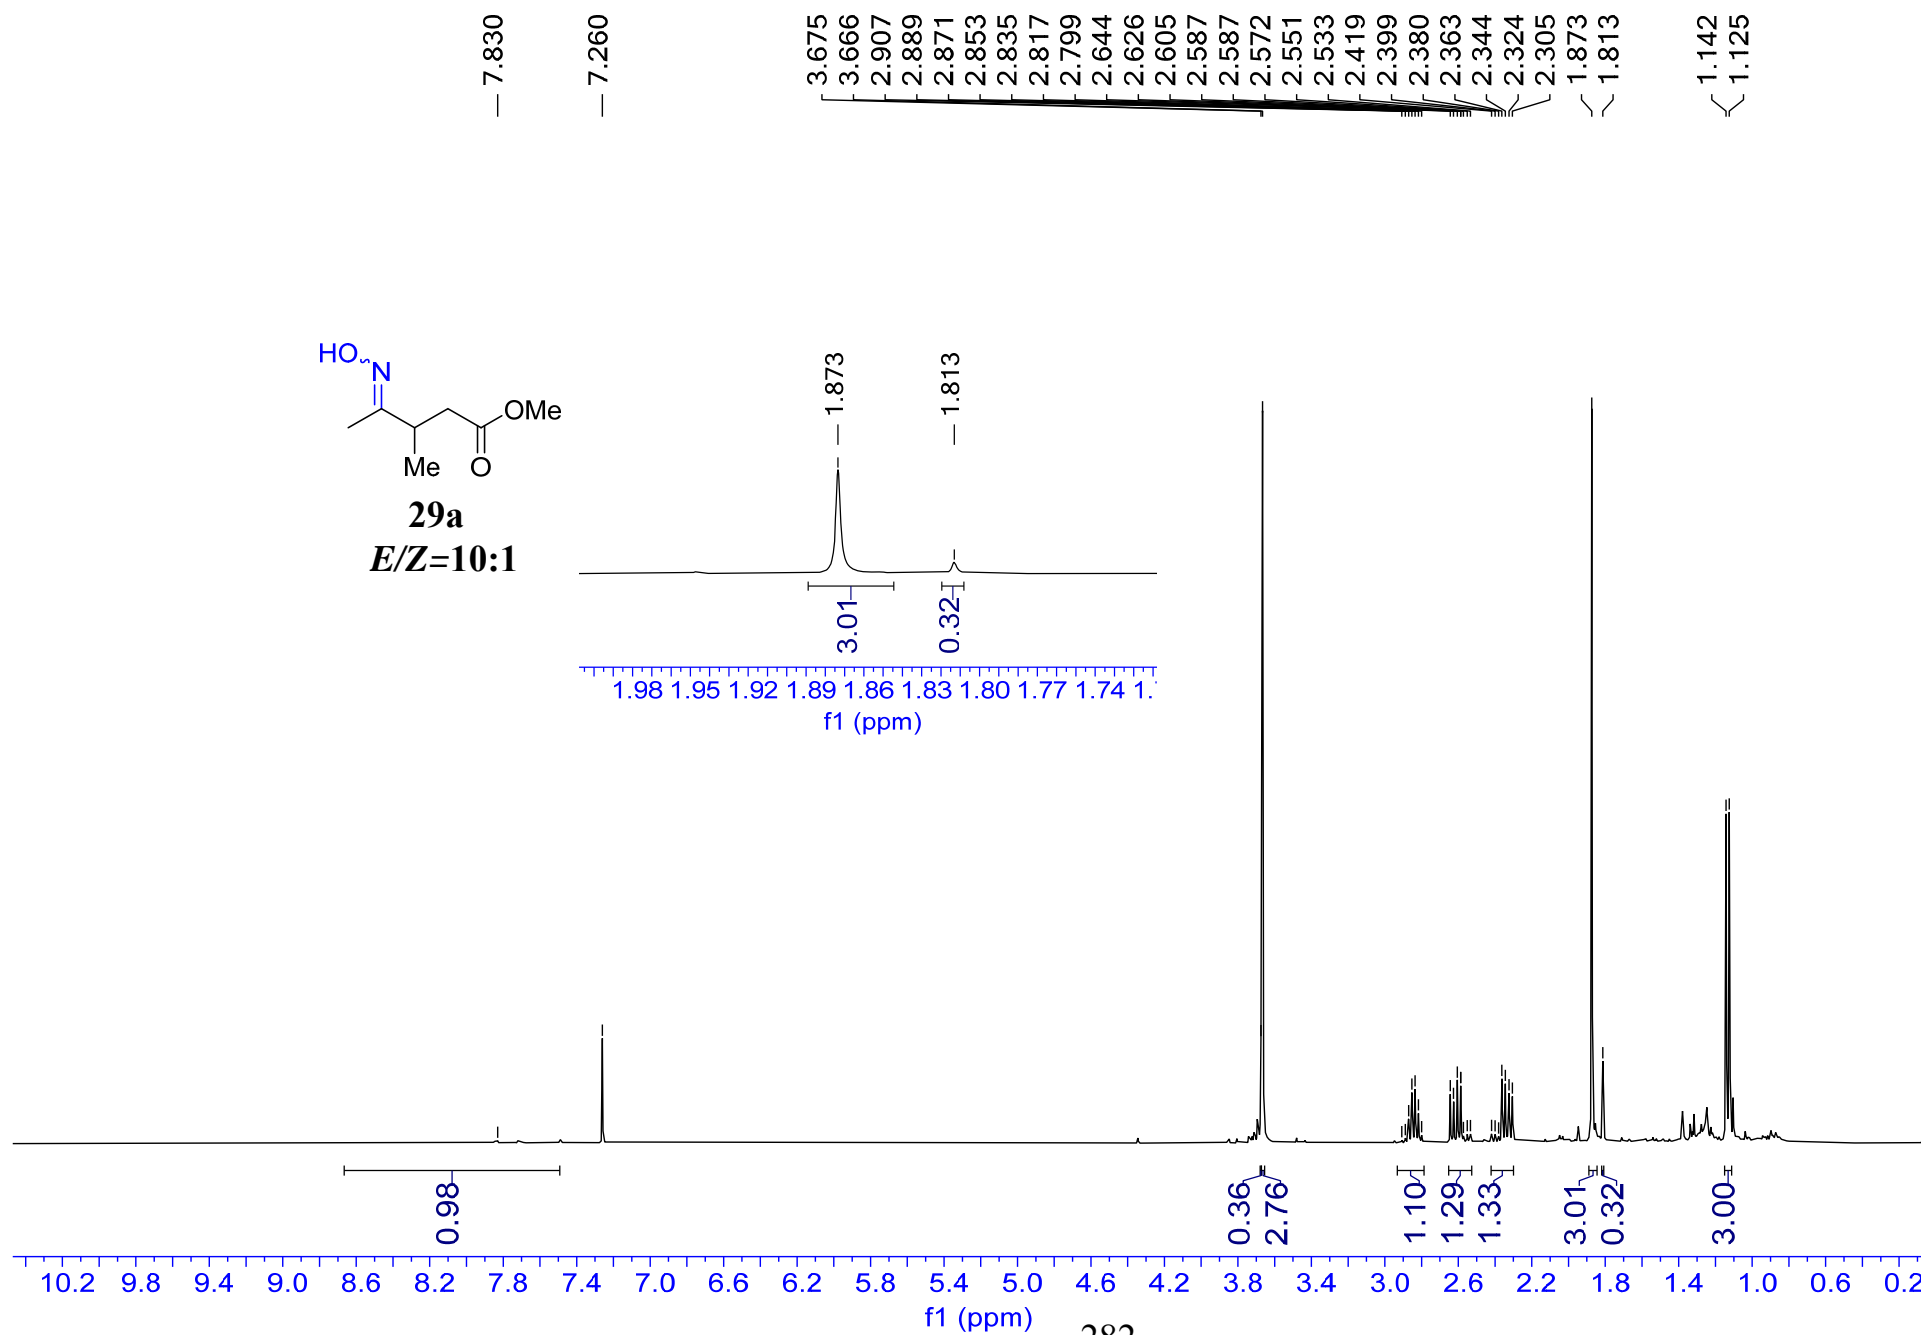

<sup>13</sup>C NMR 101 MHz, CDCl<sub>3</sub>

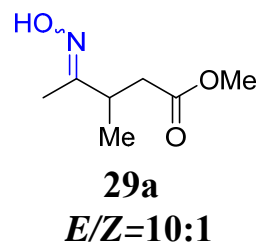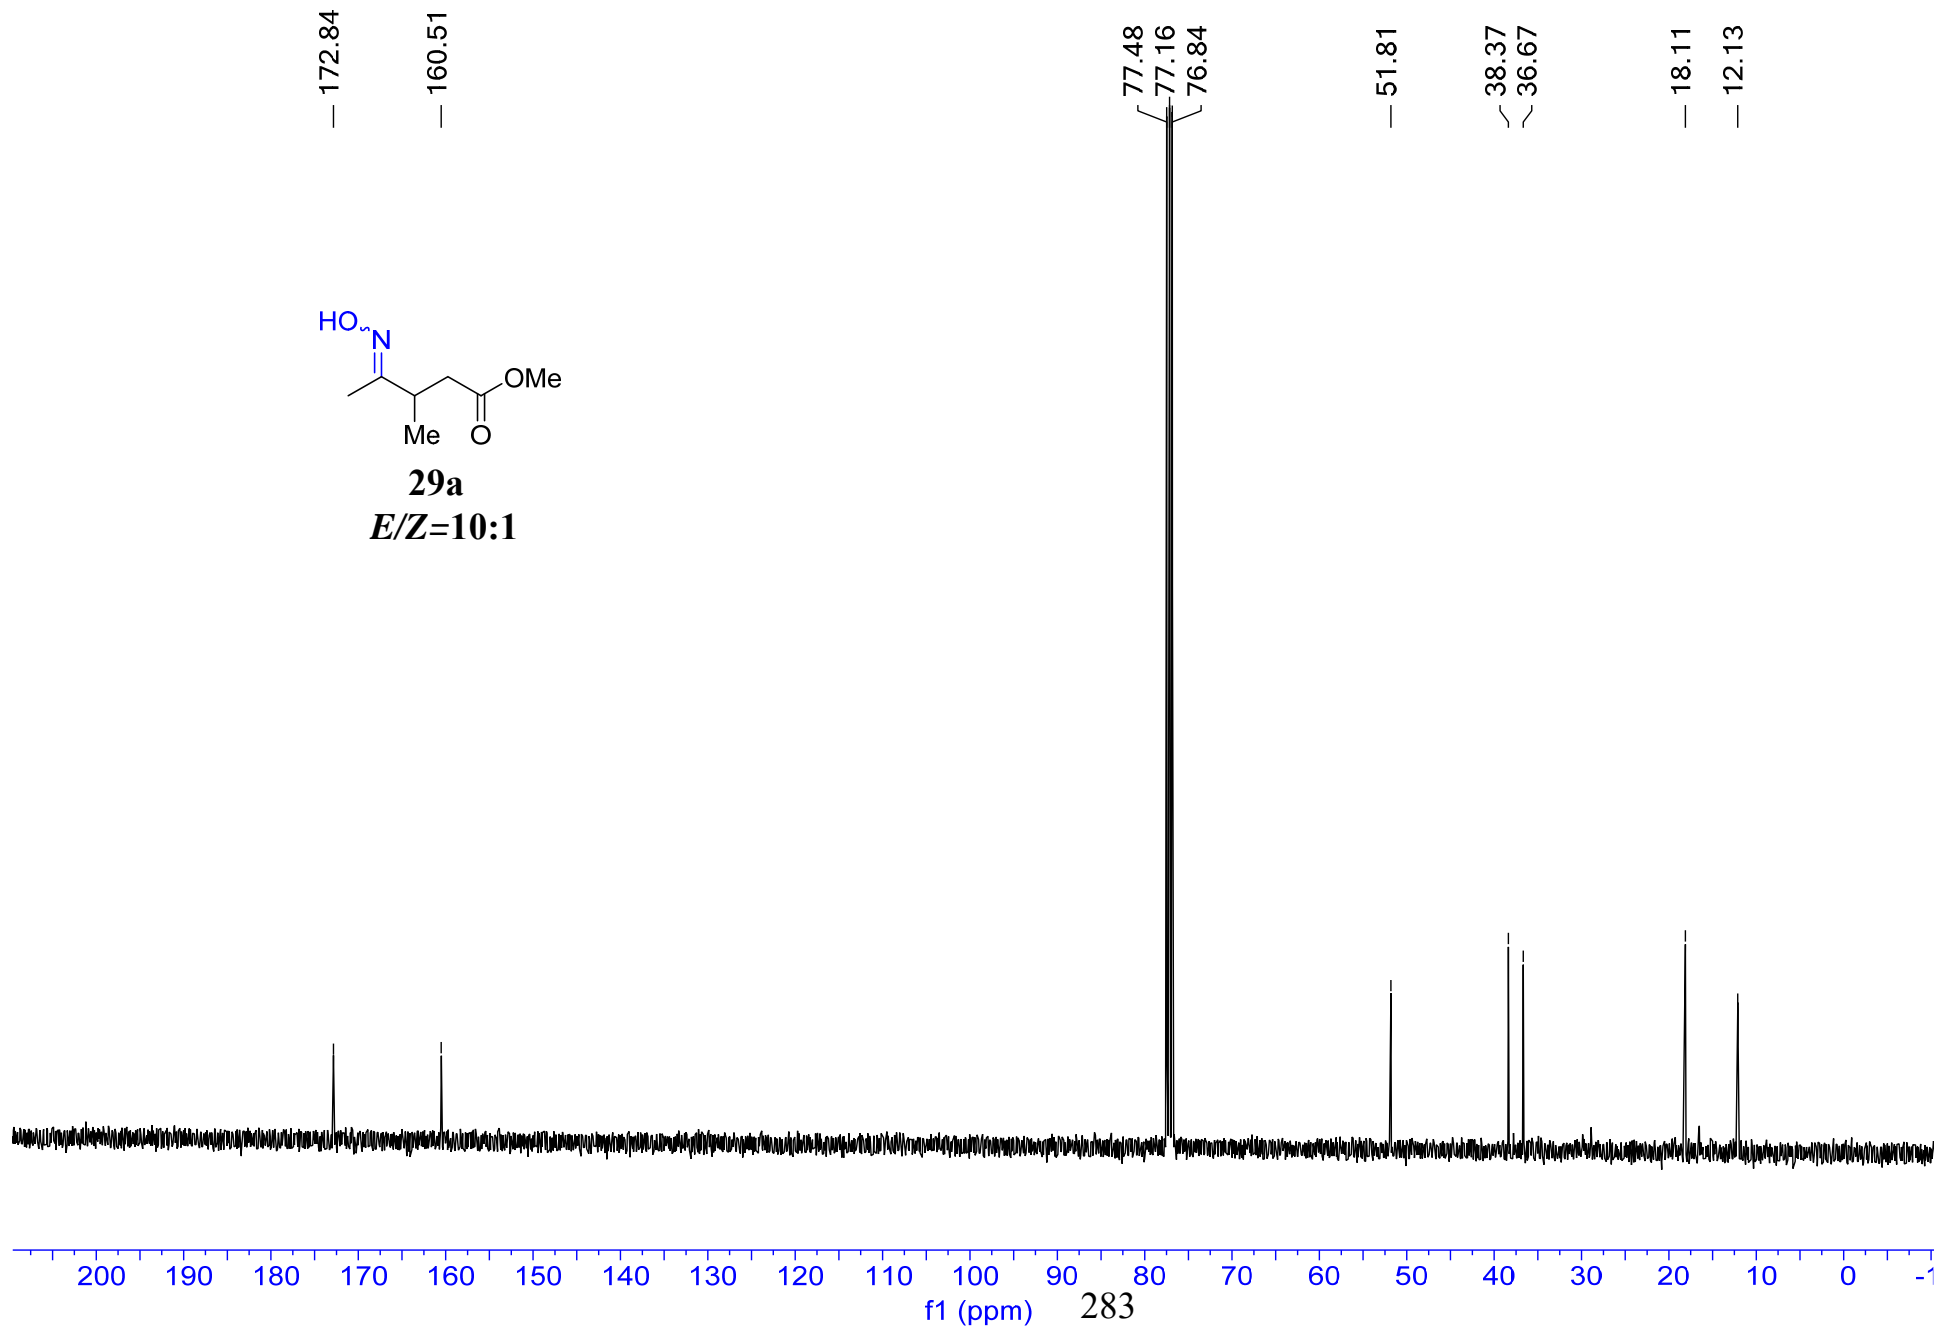

<sup>1</sup>H NMR, 400 MHz, CDCl<sub>3</sub>

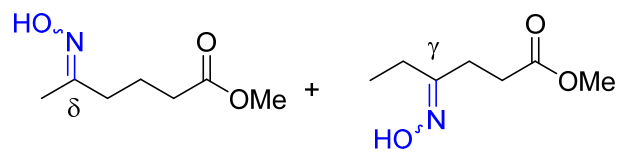

**30a**

$\gamma:\delta=1:5$

$\delta, E/Z=3:1$

$\gamma, E/Z=1:1$

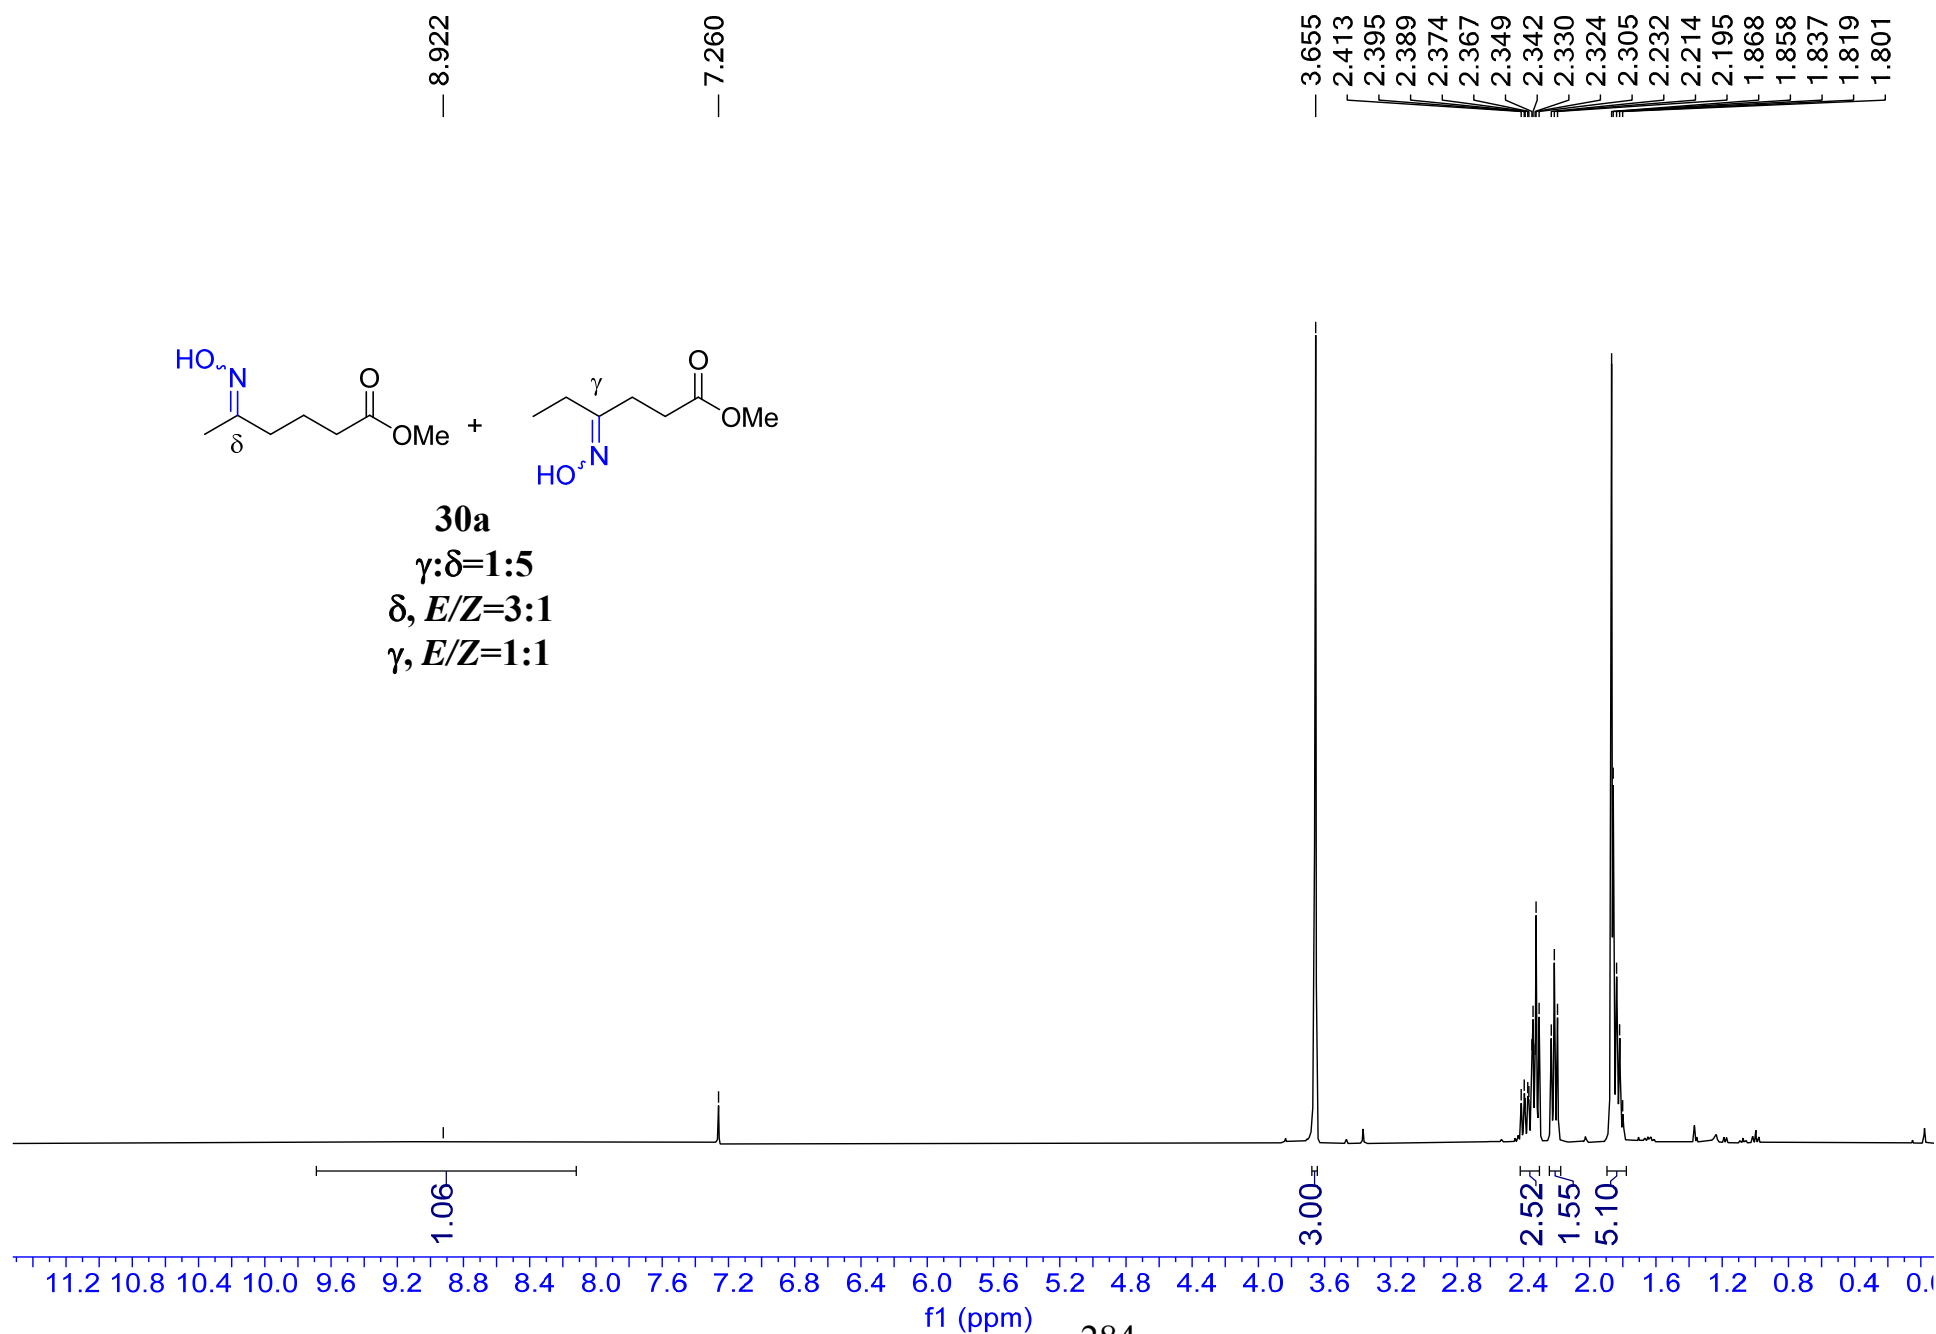



$^{13}\text{C}$  NMR 101 MHz,  $\text{CDCl}_3$

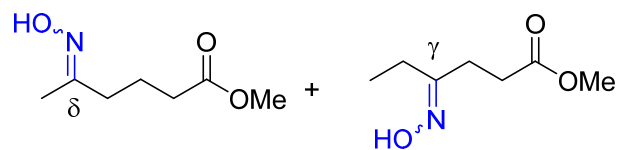

**30a**

$\gamma:\delta=1:5$

$\delta, E/Z=3:1$

$\gamma, E/Z=1:1$

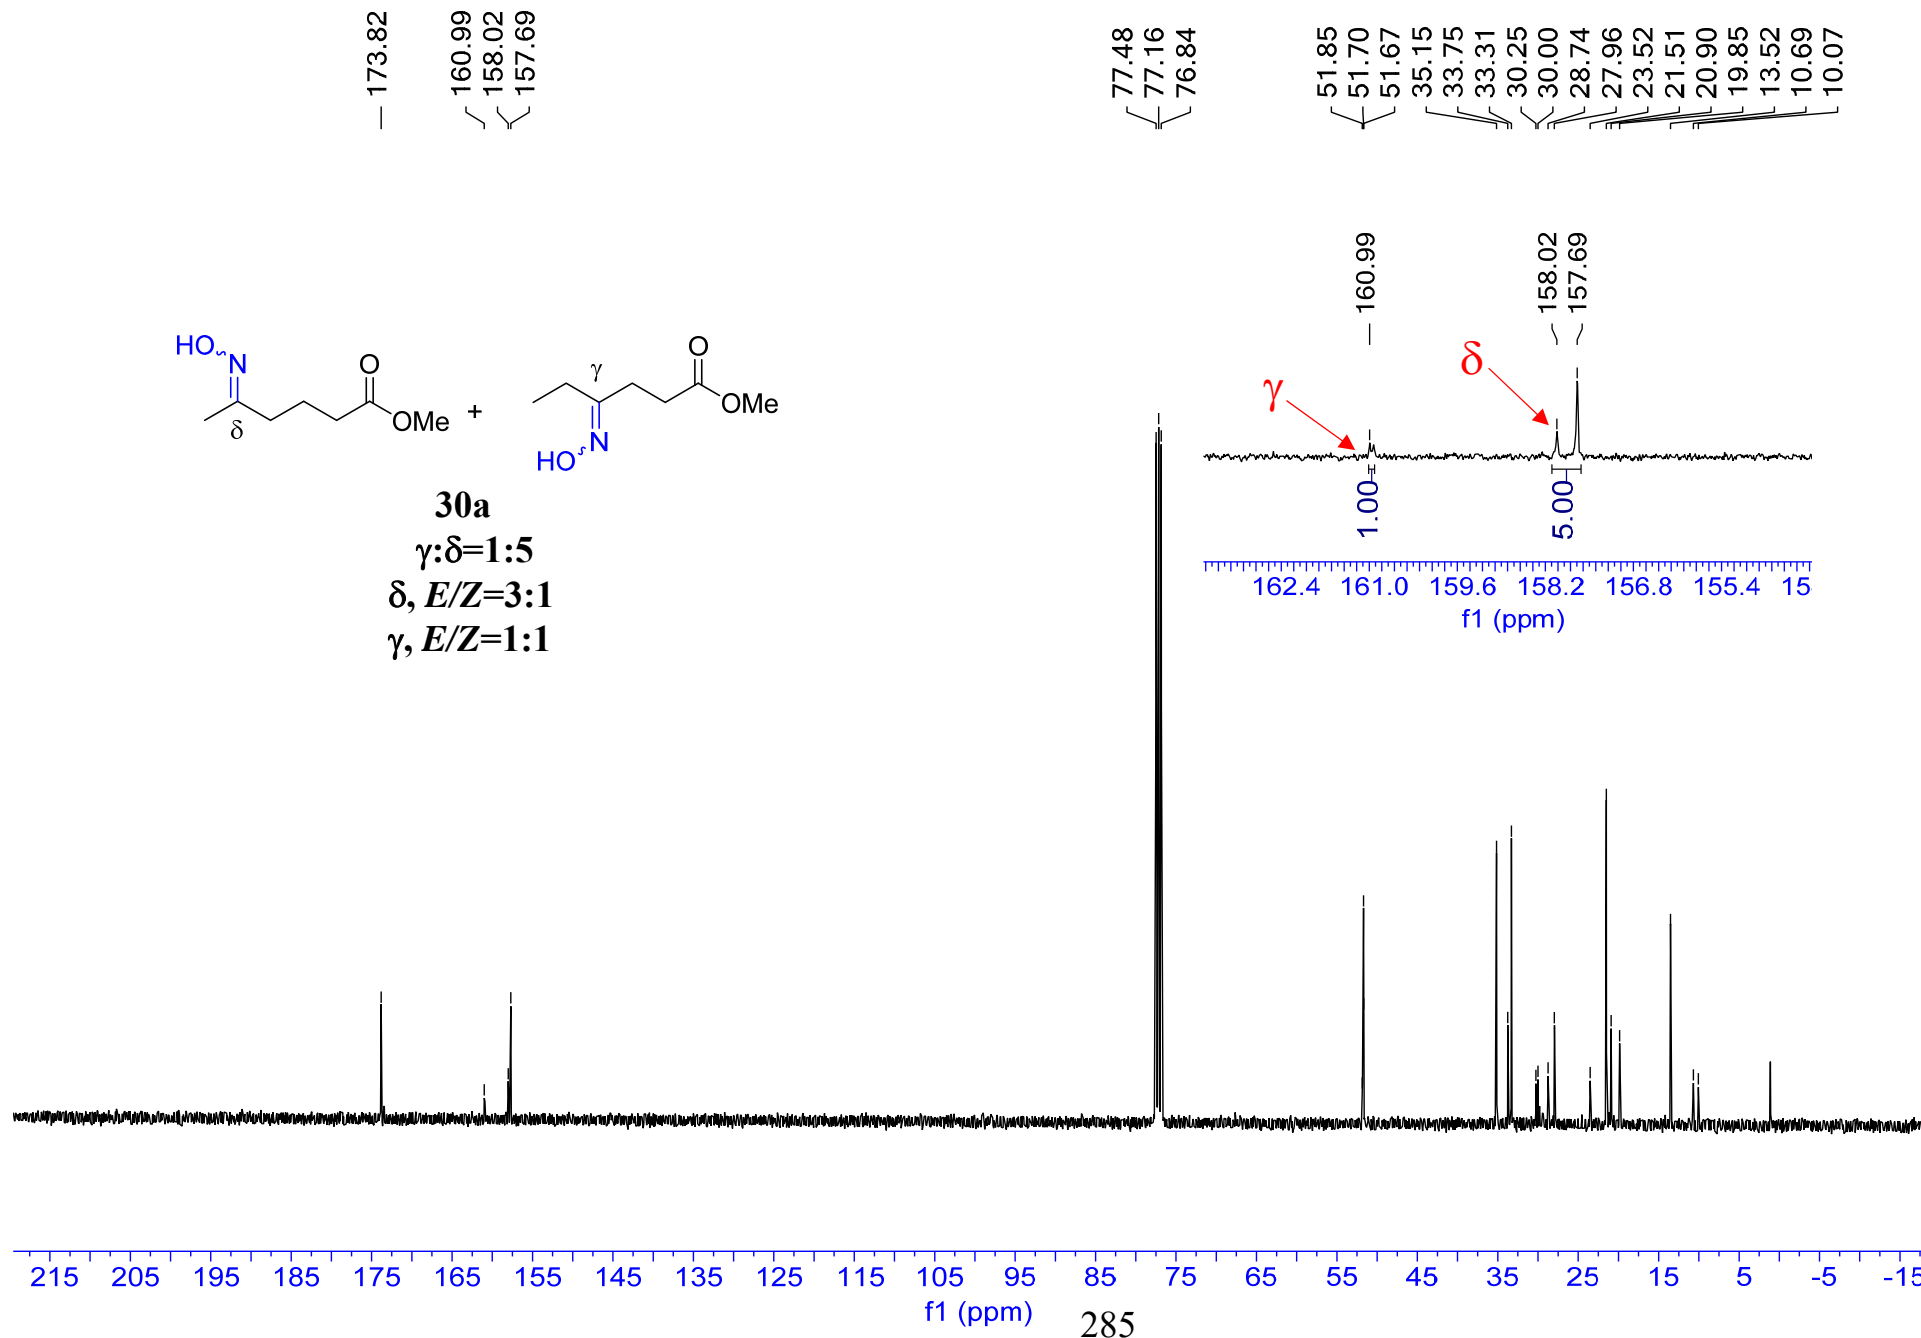

<sup>1</sup>H NMR, 400 MHz, CDCl<sub>3</sub>

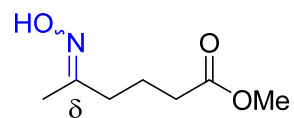

**30a (δ-product)**  
*E/Z=3:1*

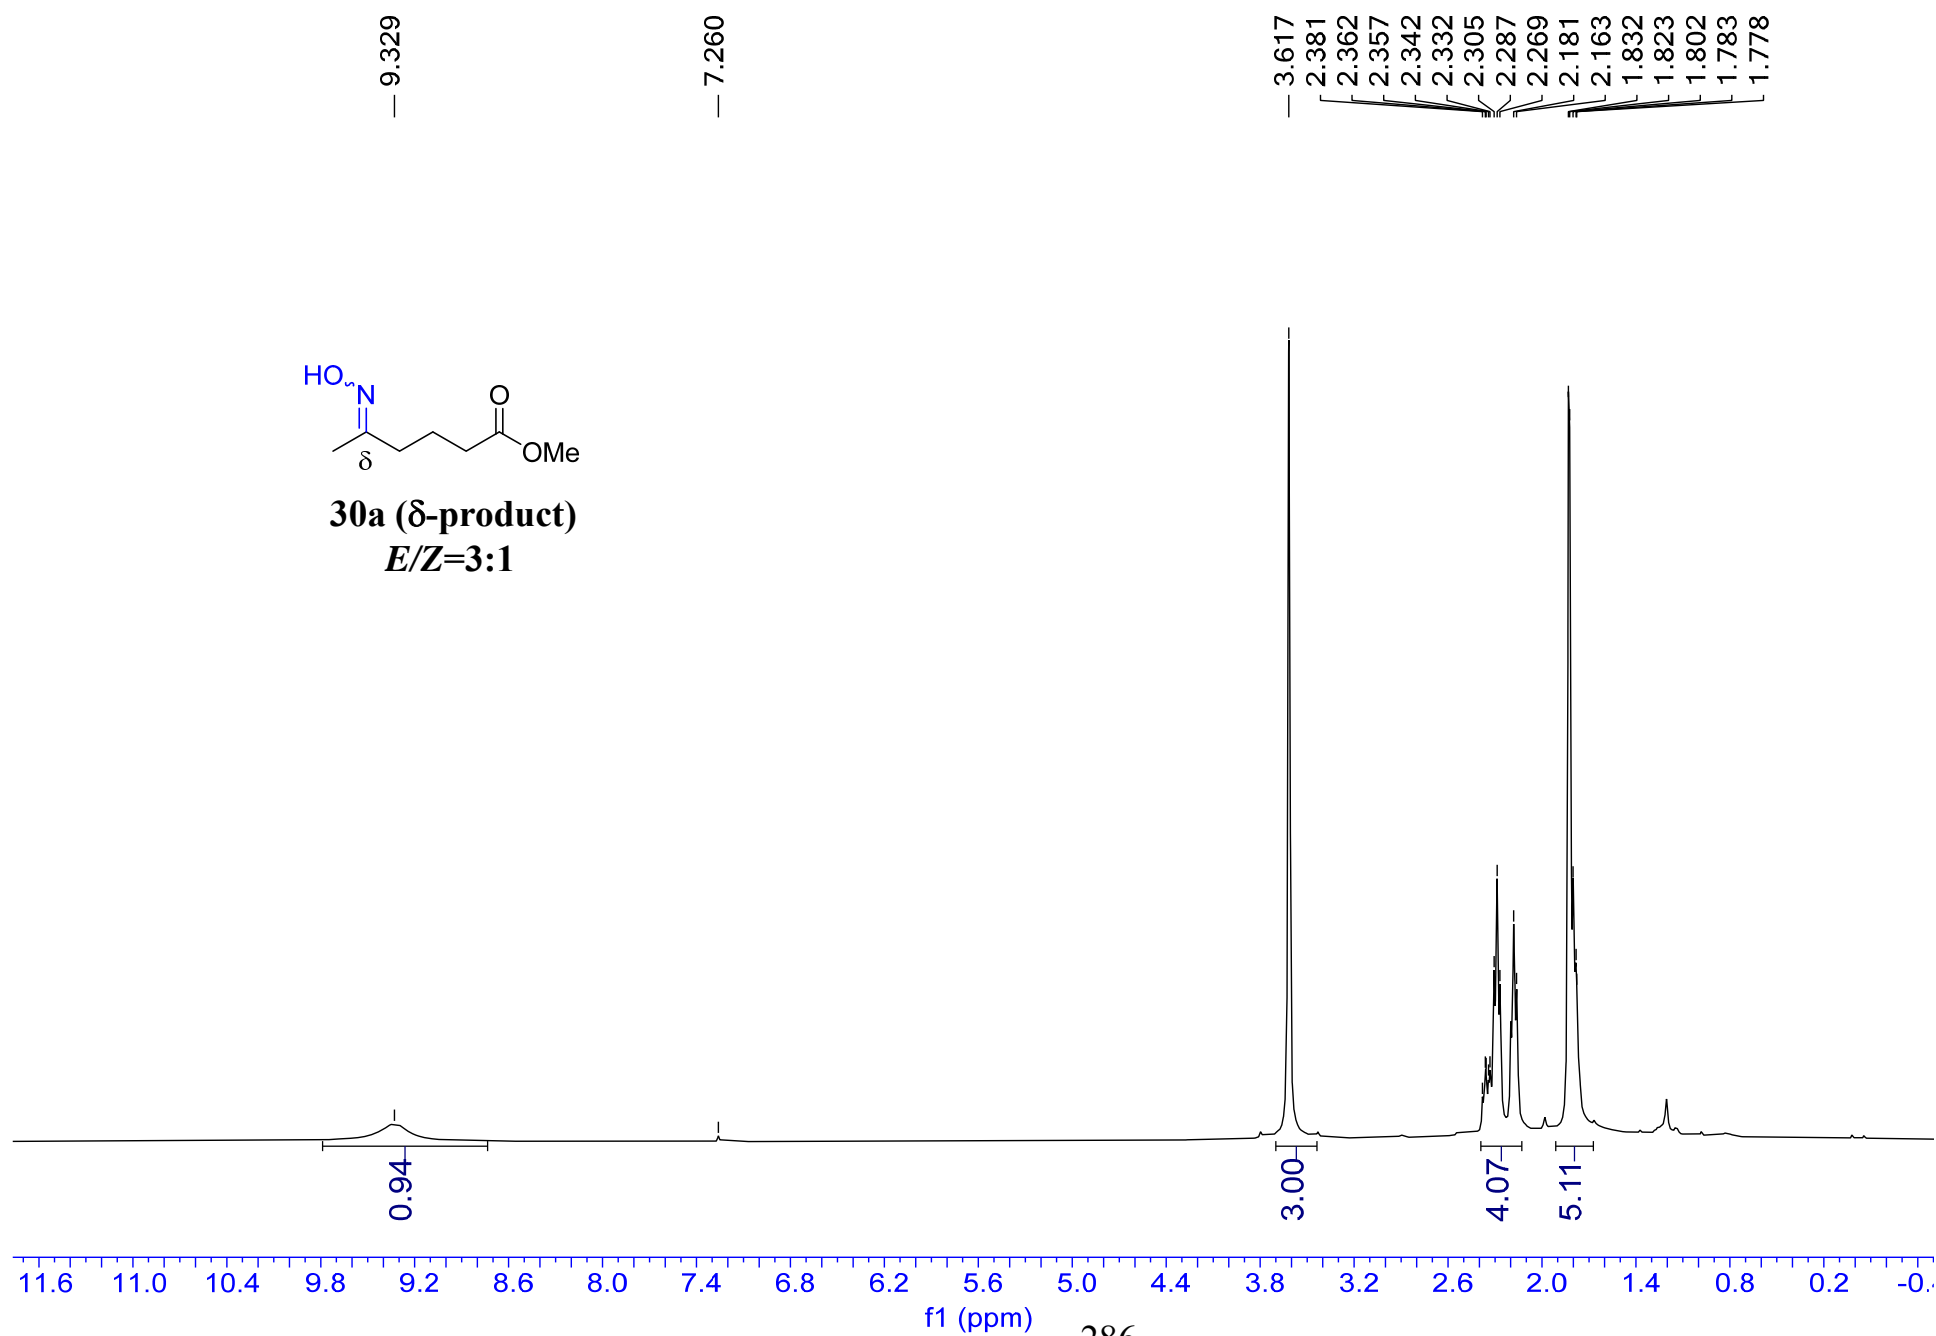

<sup>13</sup>C NMR 101 MHz, CDCl<sub>3</sub>

— 173.75

157.84  
157.53

77.48  
77.16  
76.84

— 51.58

35.04  
33.68  
33.23  
27.92  
21.49  
20.83  
19.70  
13.42

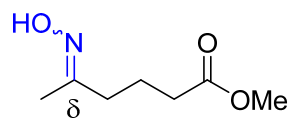

**30a (δ-product)**  
*E/Z=3:1*

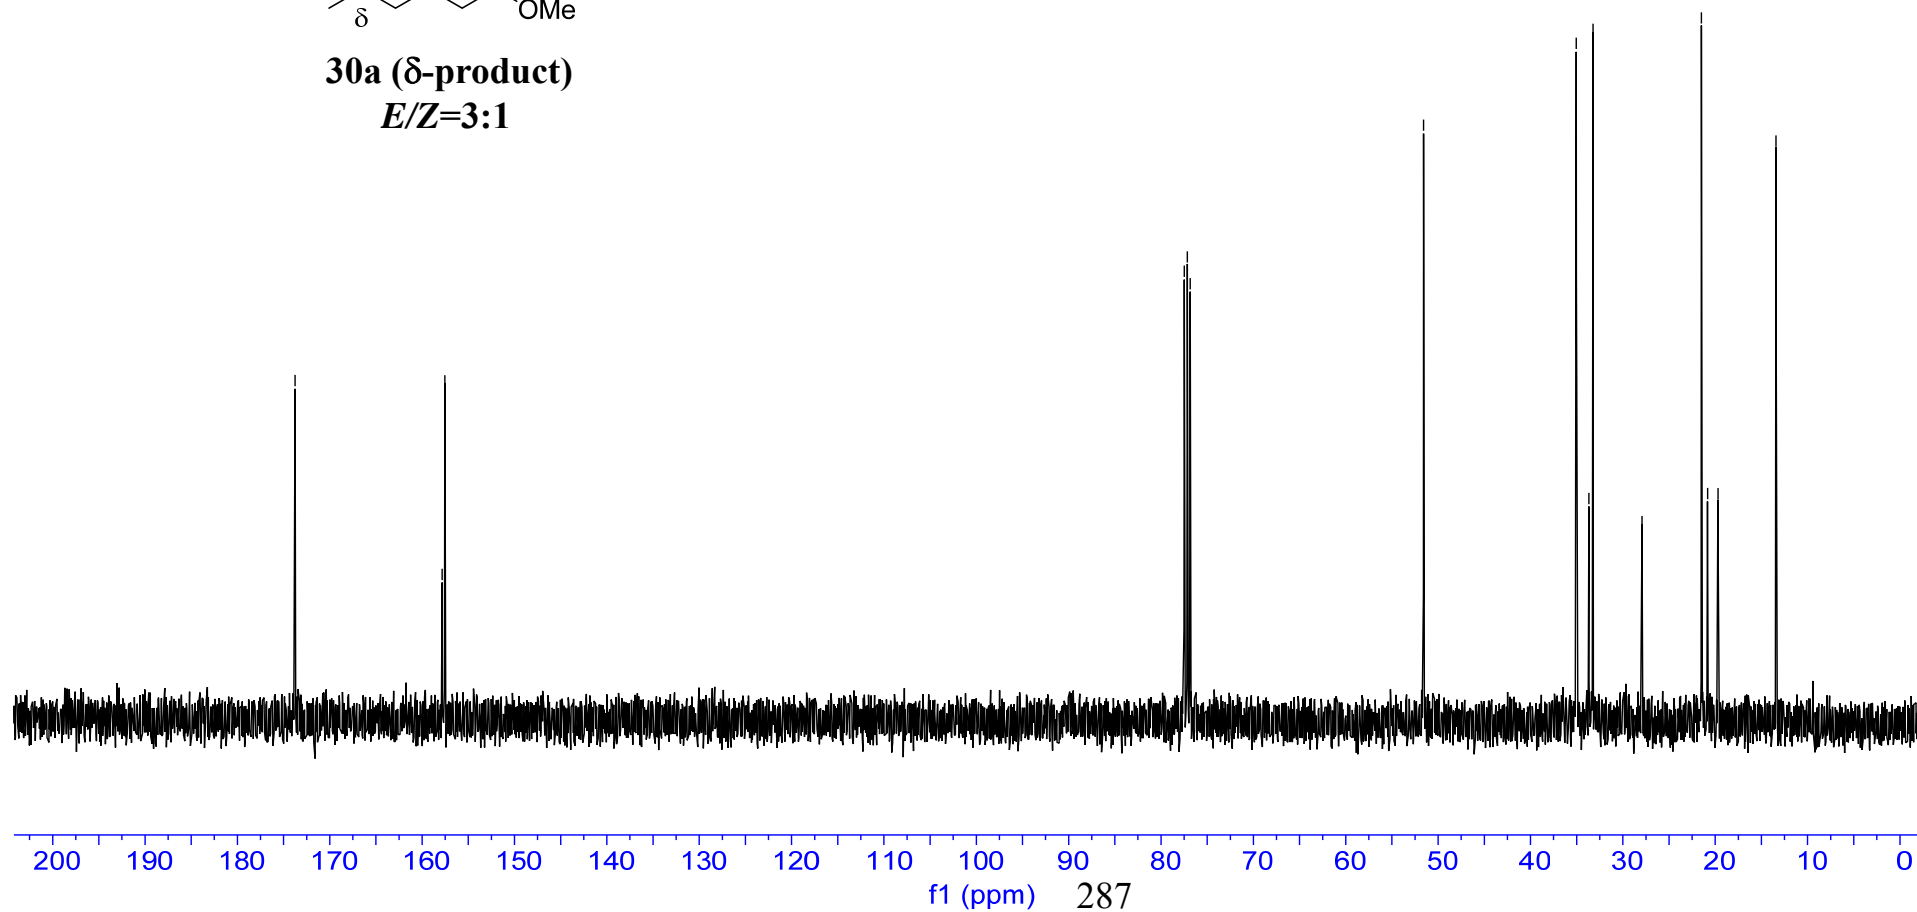

<sup>1</sup>H NMR, 400 MHz, CDCl<sub>3</sub>

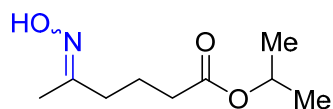

**31a**  
*E/Z*=3:1

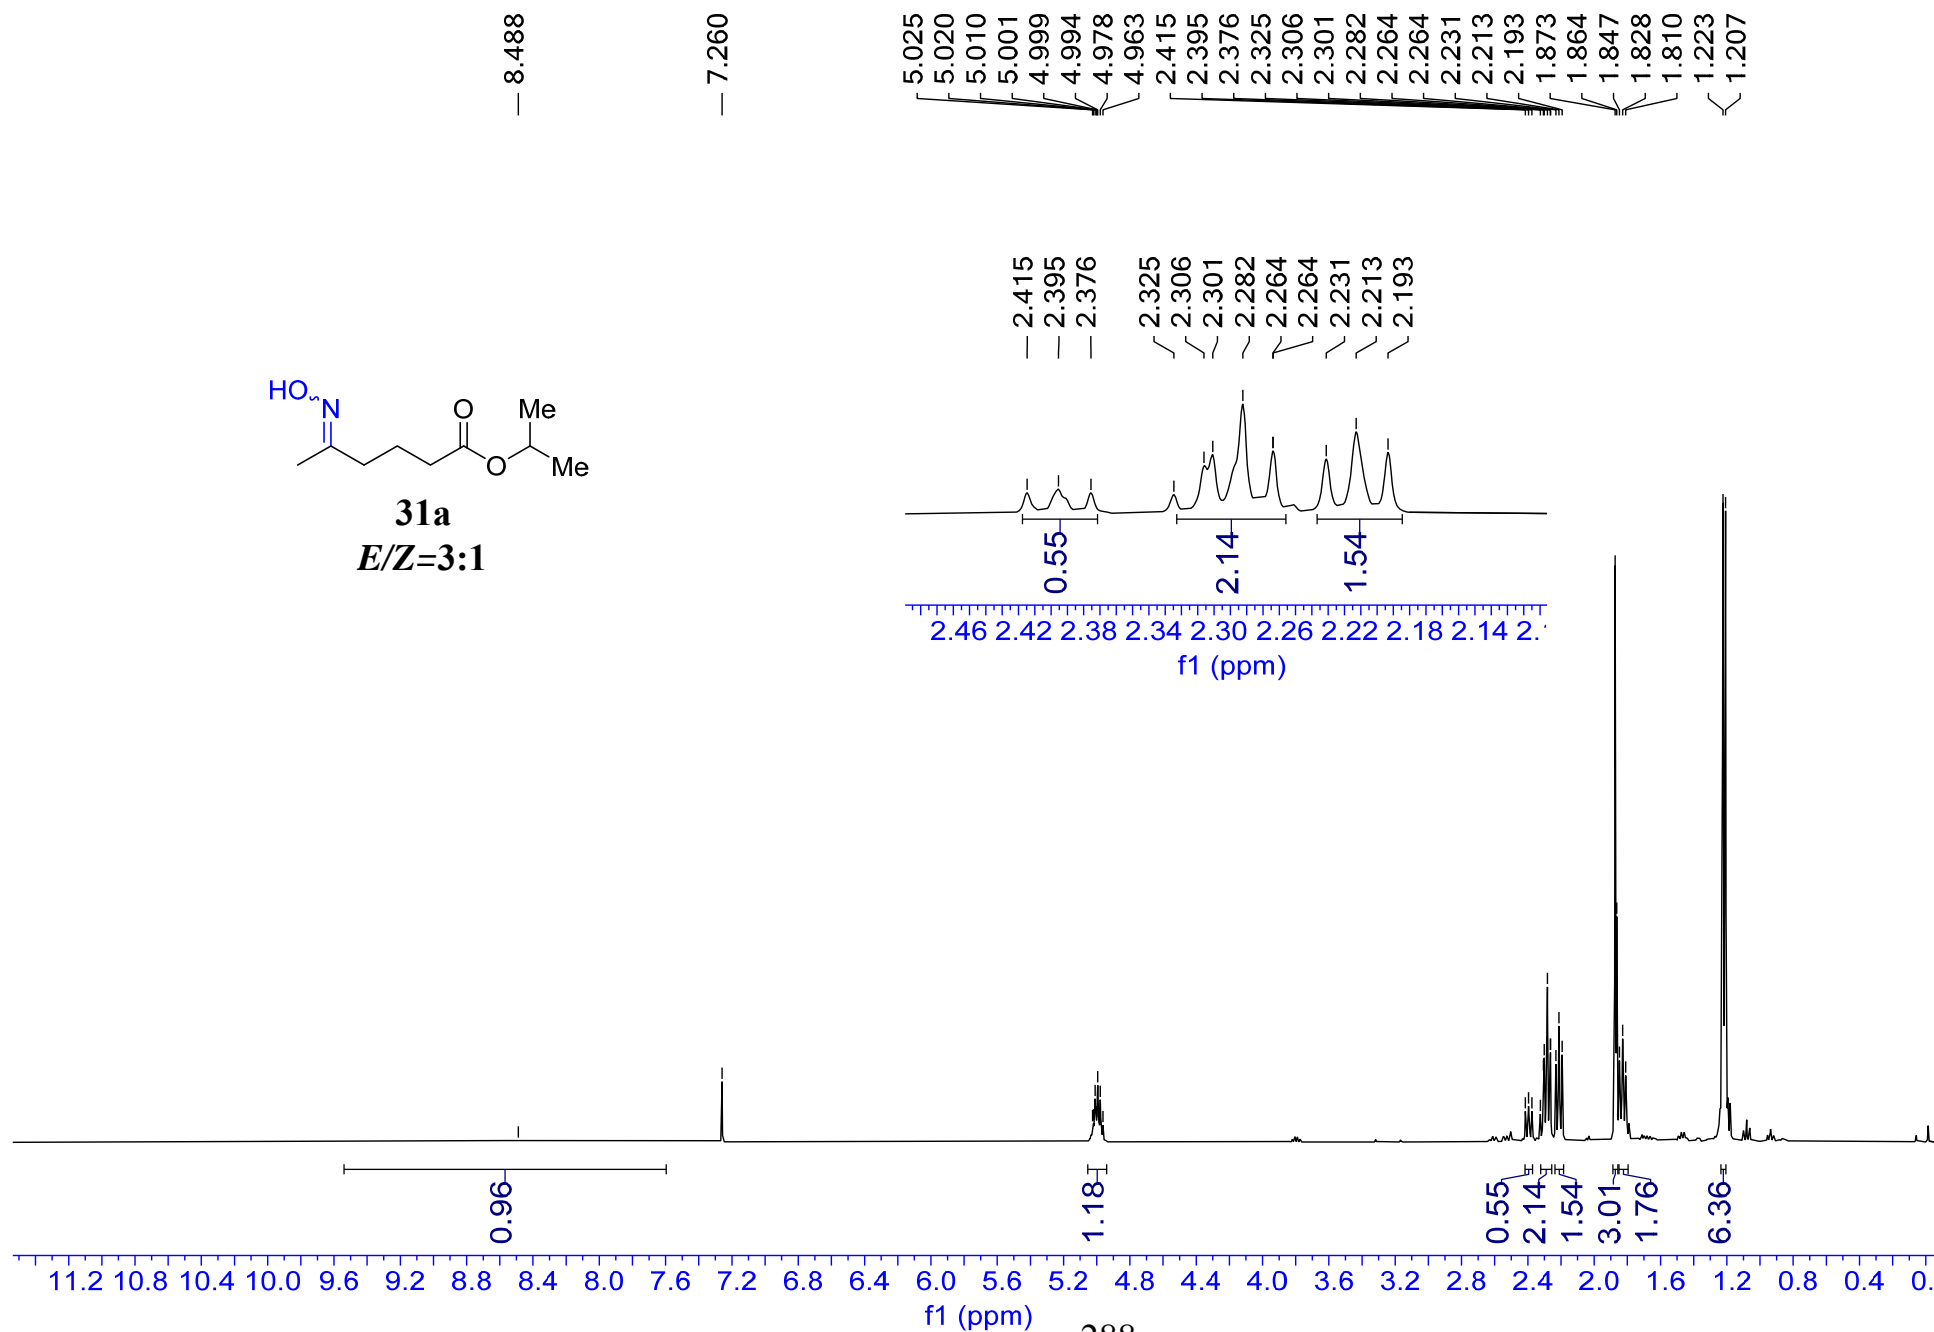

$^{13}\text{C}$  NMR 101 MHz,  $\text{CDCl}_3$

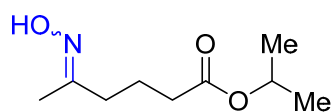

**31a**

*E/Z*=3:1

— 172.90

158.23  
157.84

77.48  
77.16  
76.84  
67.80  
67.78

35.22  
34.41  
34.00  
27.97  
21.96  
21.67  
21.21  
21.02  
19.93  
13.51

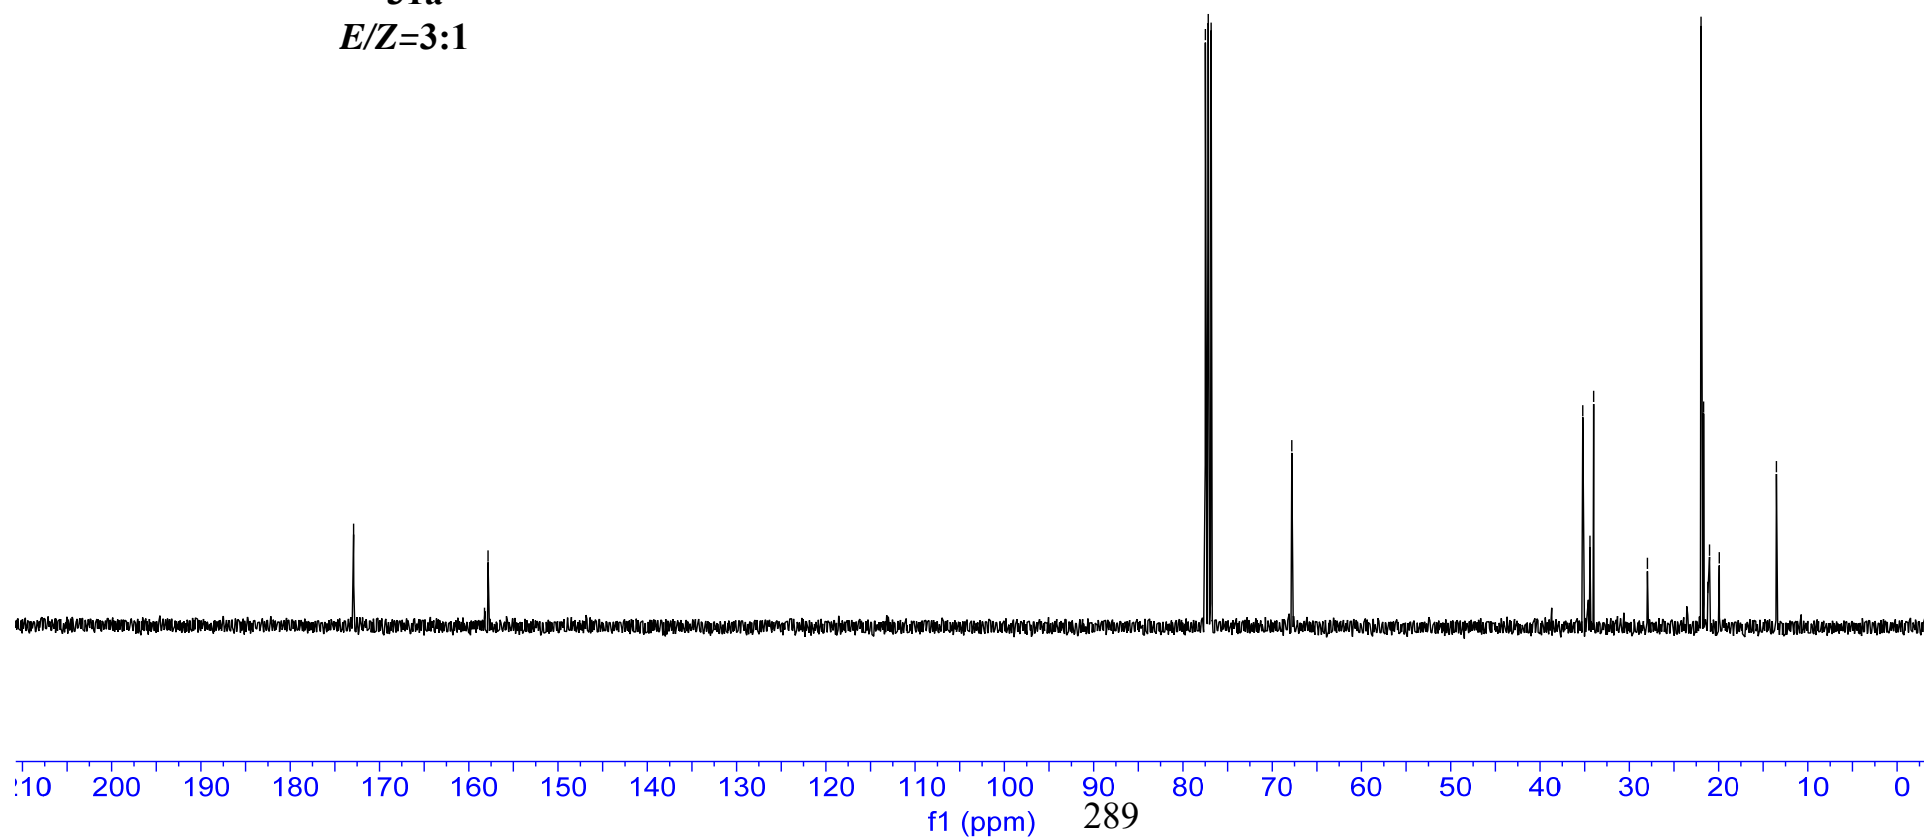

<sup>1</sup>H NMR, 400 MHz, CDCl<sub>3</sub>

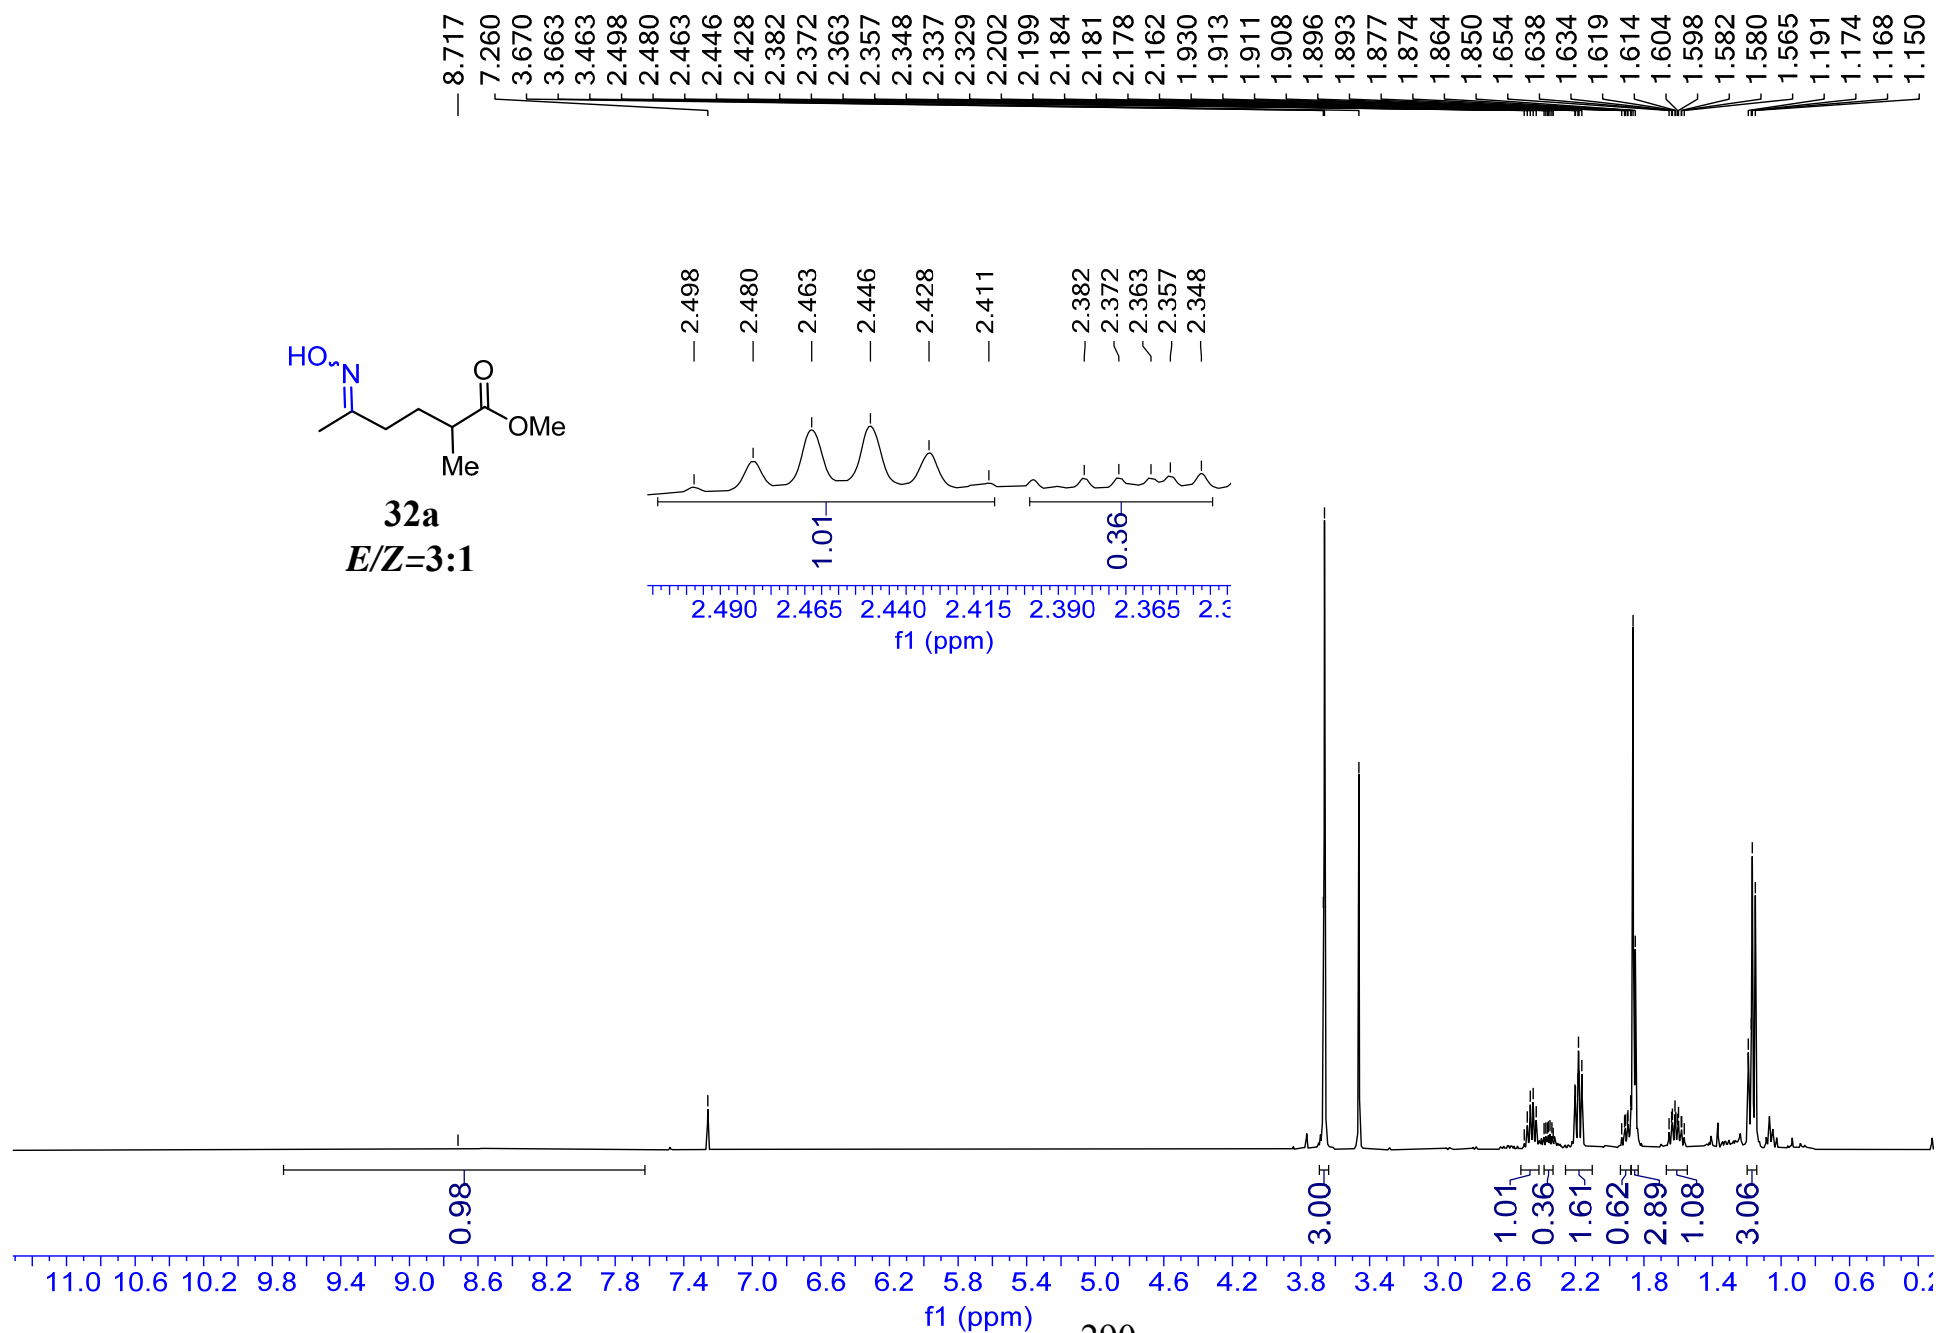

$^{13}\text{C}$  NMR 101 MHz,  $\text{CDCl}_3$

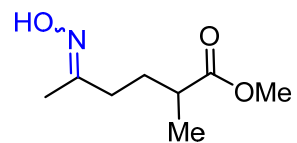

**32a**  
*E/Z*=3:1

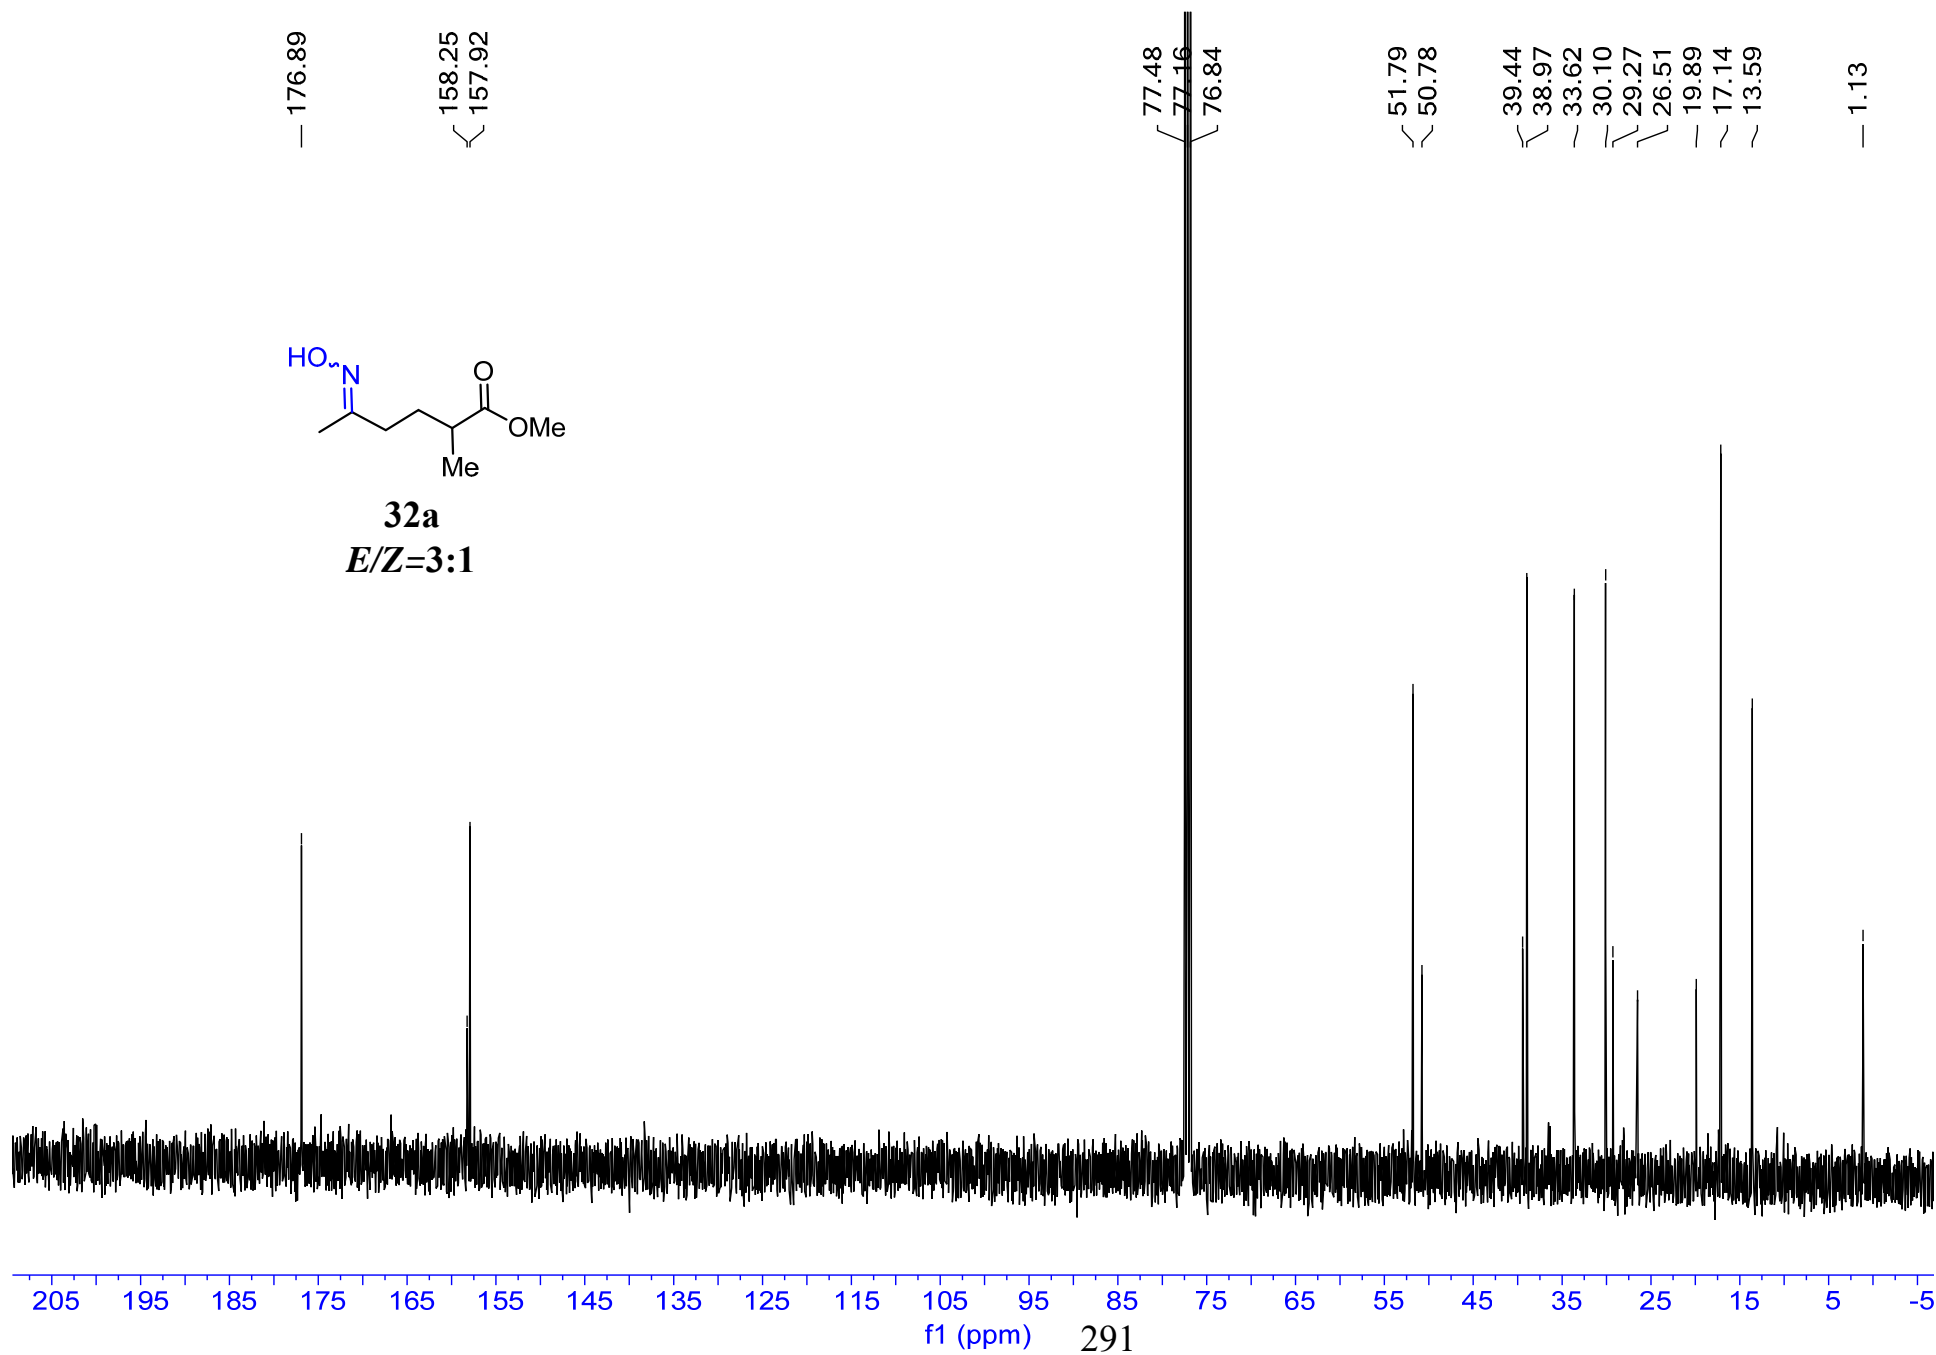

<sup>1</sup>H NMR, 400 MHz, CDCl<sub>3</sub>

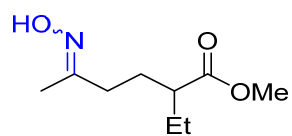

**33a**  
*E/Z*=3:1

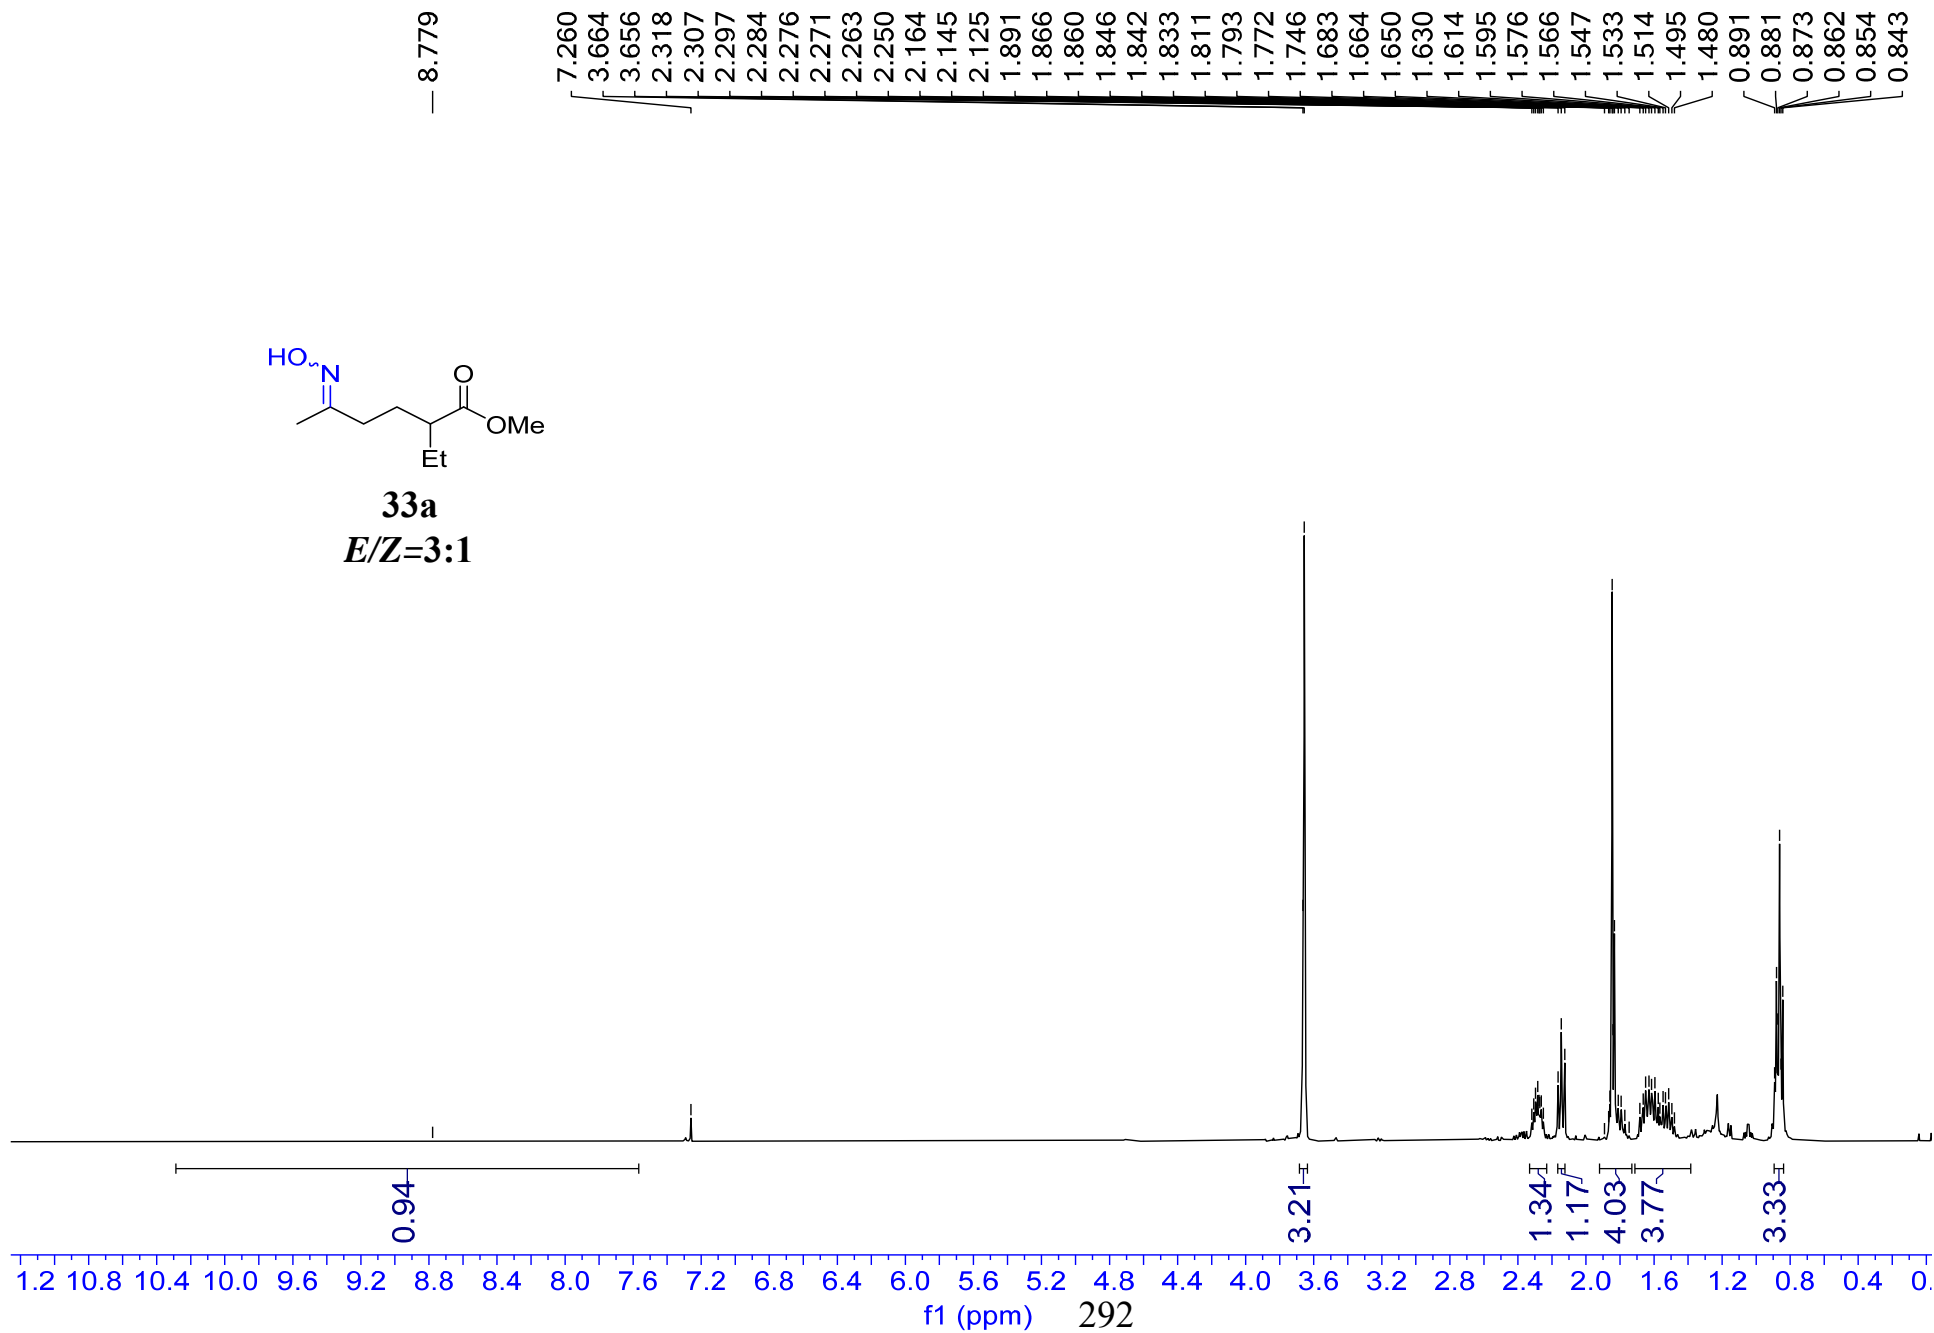



<sup>13</sup>C NMR 101 MHz, CDCl<sub>3</sub>

— 176.40

158.17  
157.84

77.48  
77.16  
76.84

51.58  
51.55  
46.97  
46.58

33.79  
28.31  
27.40  
26.70  
25.44  
25.35  
19.87  
13.59  
11.72  
11.70

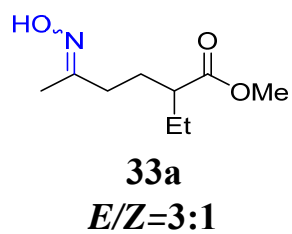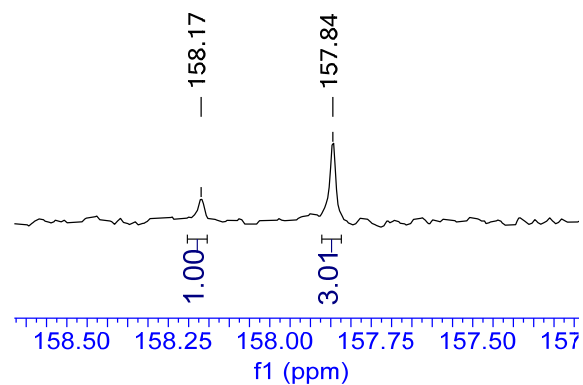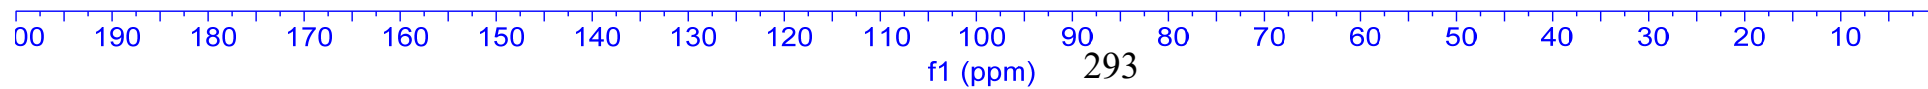

<sup>1</sup>H NMR, 400 MHz, CDCl<sub>3</sub>

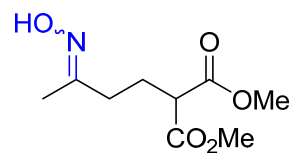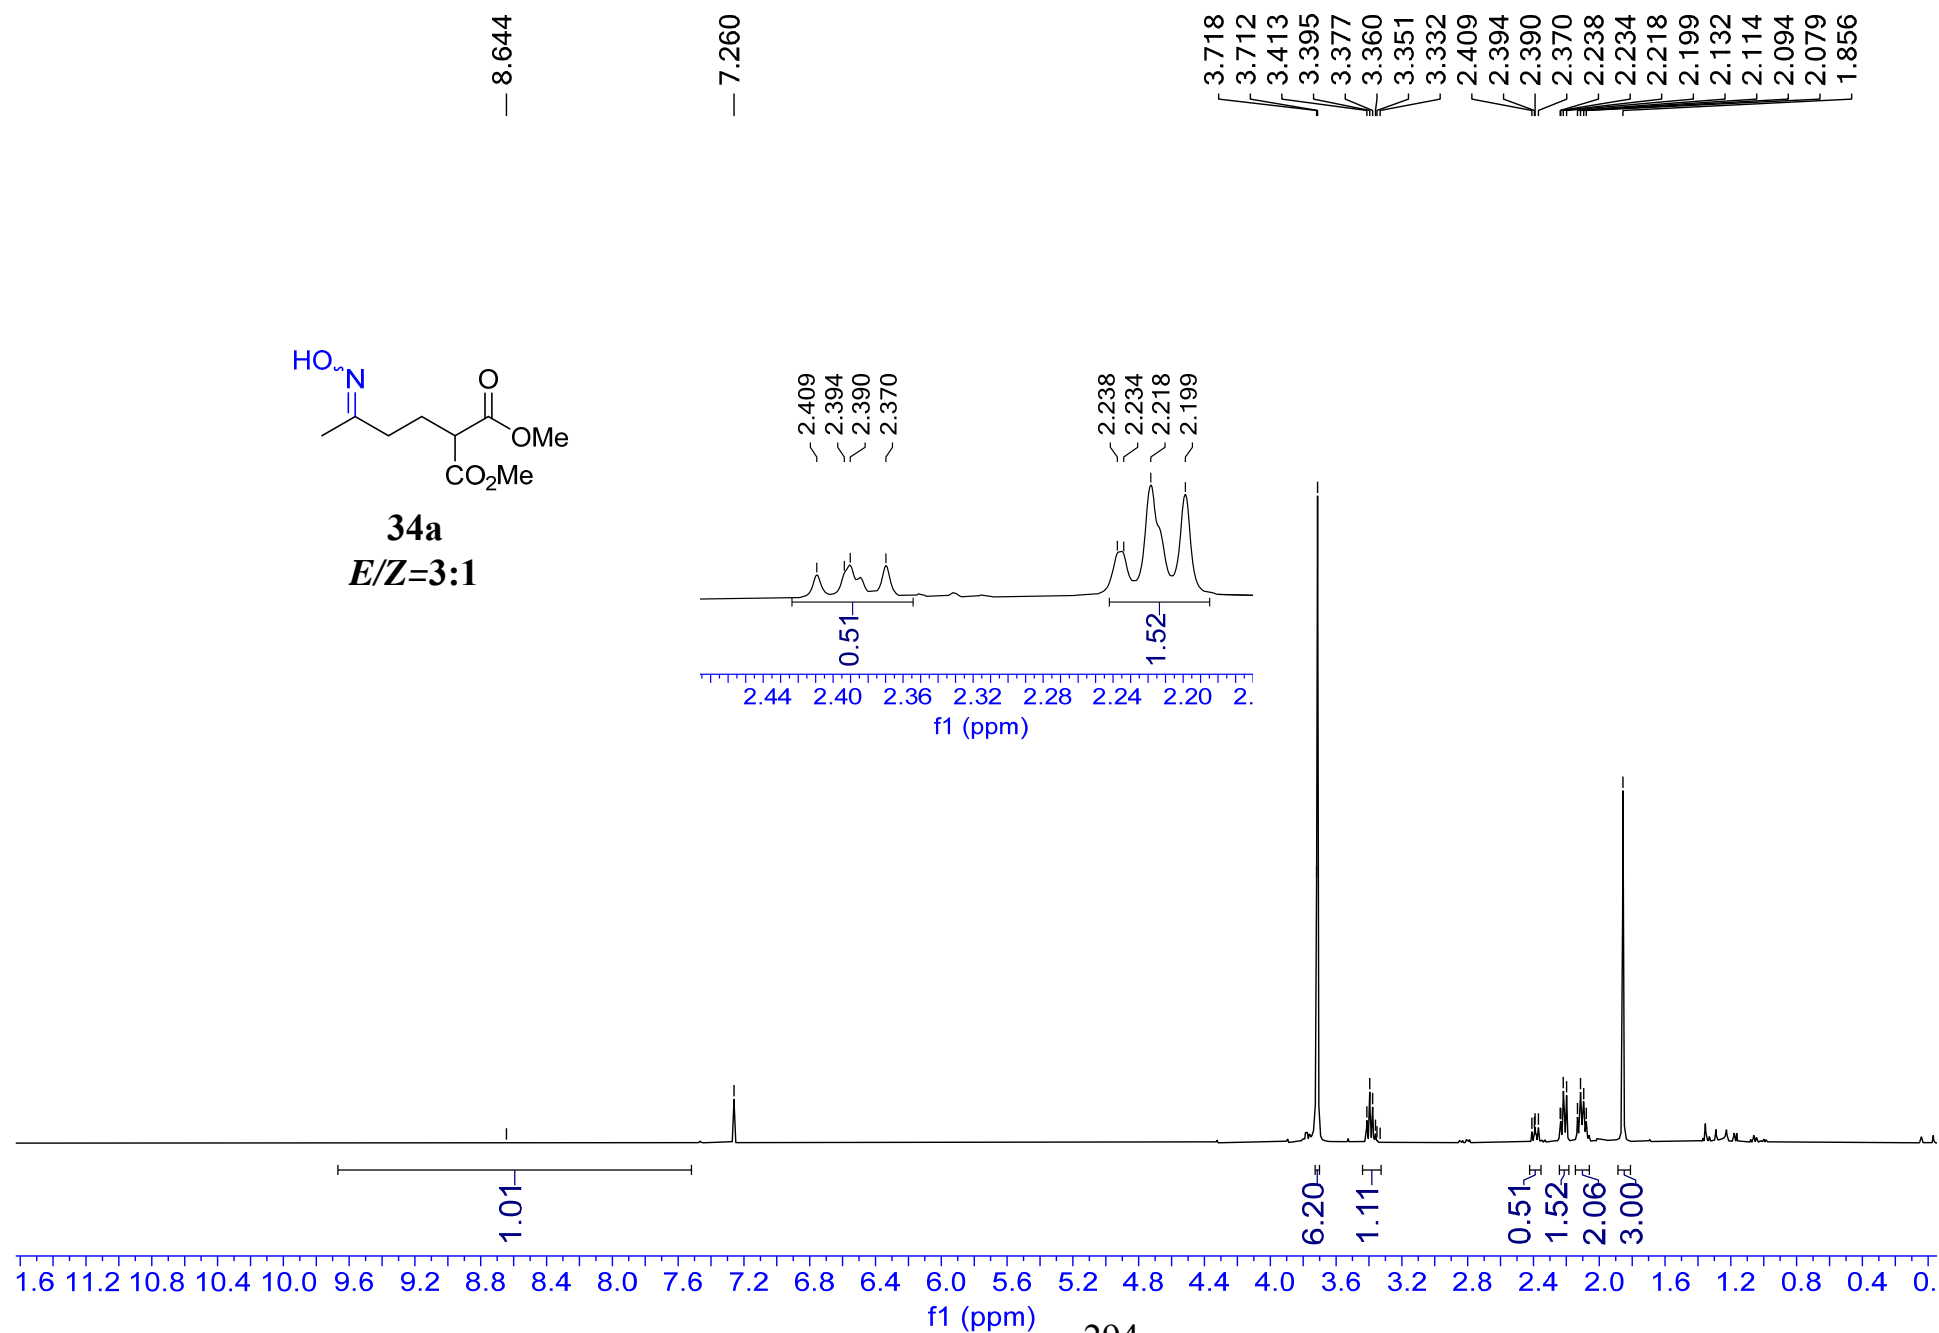

$^{13}\text{C}$  NMR 101 MHz,  $\text{CDCl}_3$

169.63  
169.58  
157.33  
157.02

77.48  
77.16  
76.84

52.67  
52.65  
51.34  
50.87

33.46  
26.44  
25.32  
24.70  
19.80  
13.61



**34a**  
*E/Z=3:1*

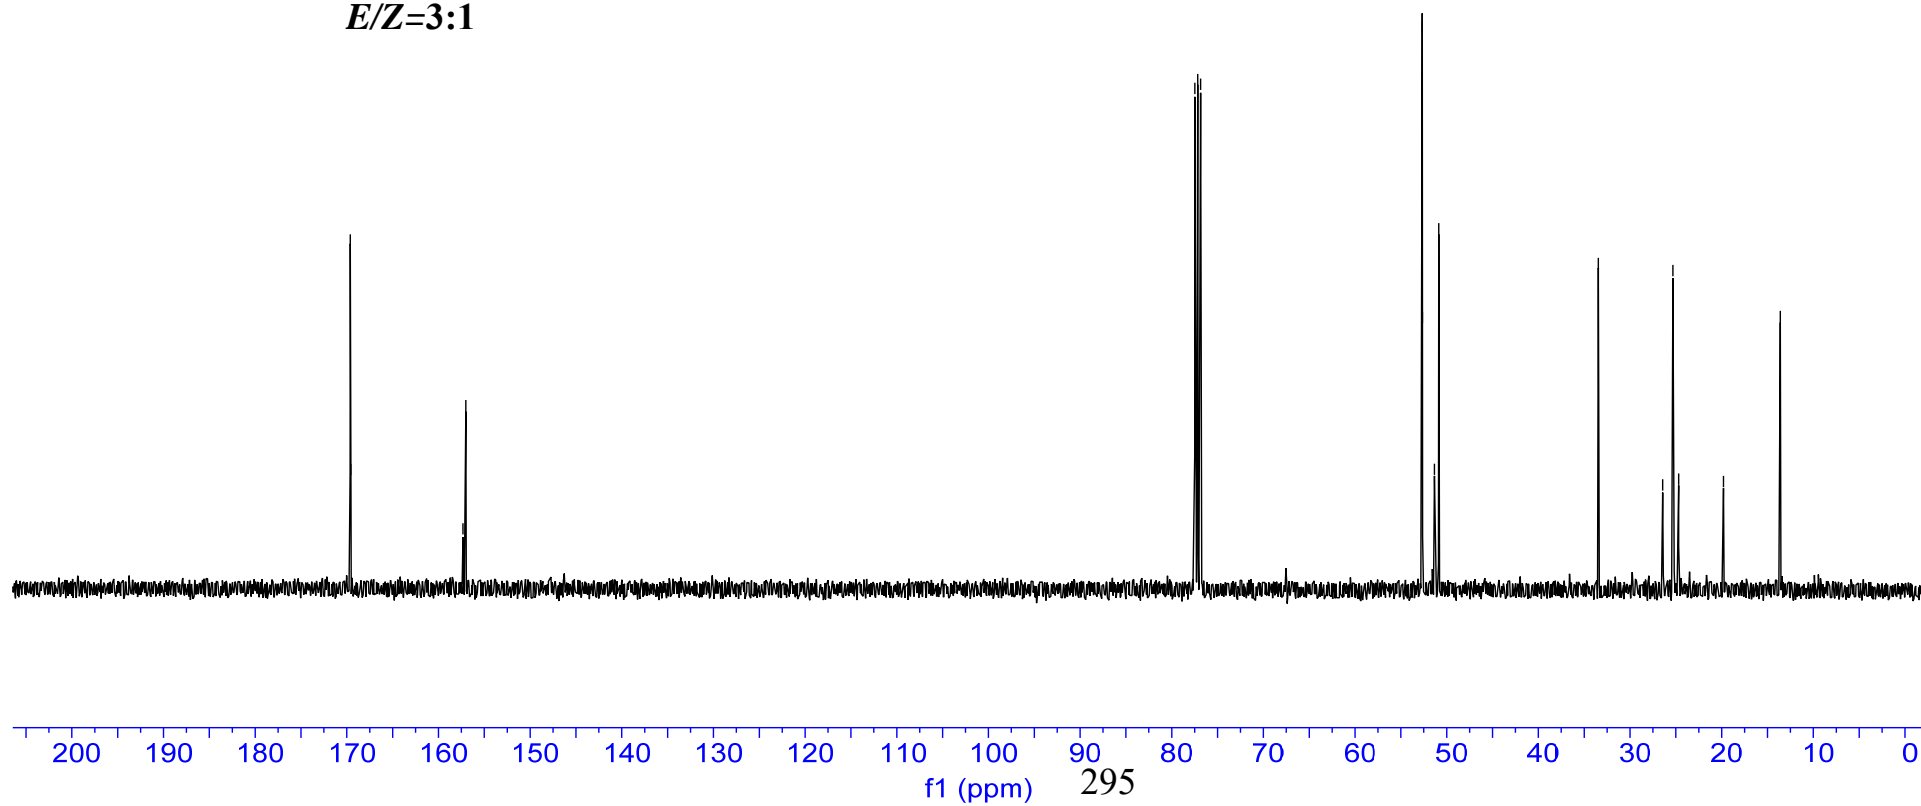

<sup>1</sup>H NMR, 400 MHz, CDCl<sub>3</sub>

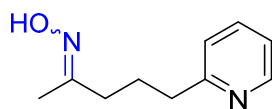

**35a**  
*E/Z*=3:1

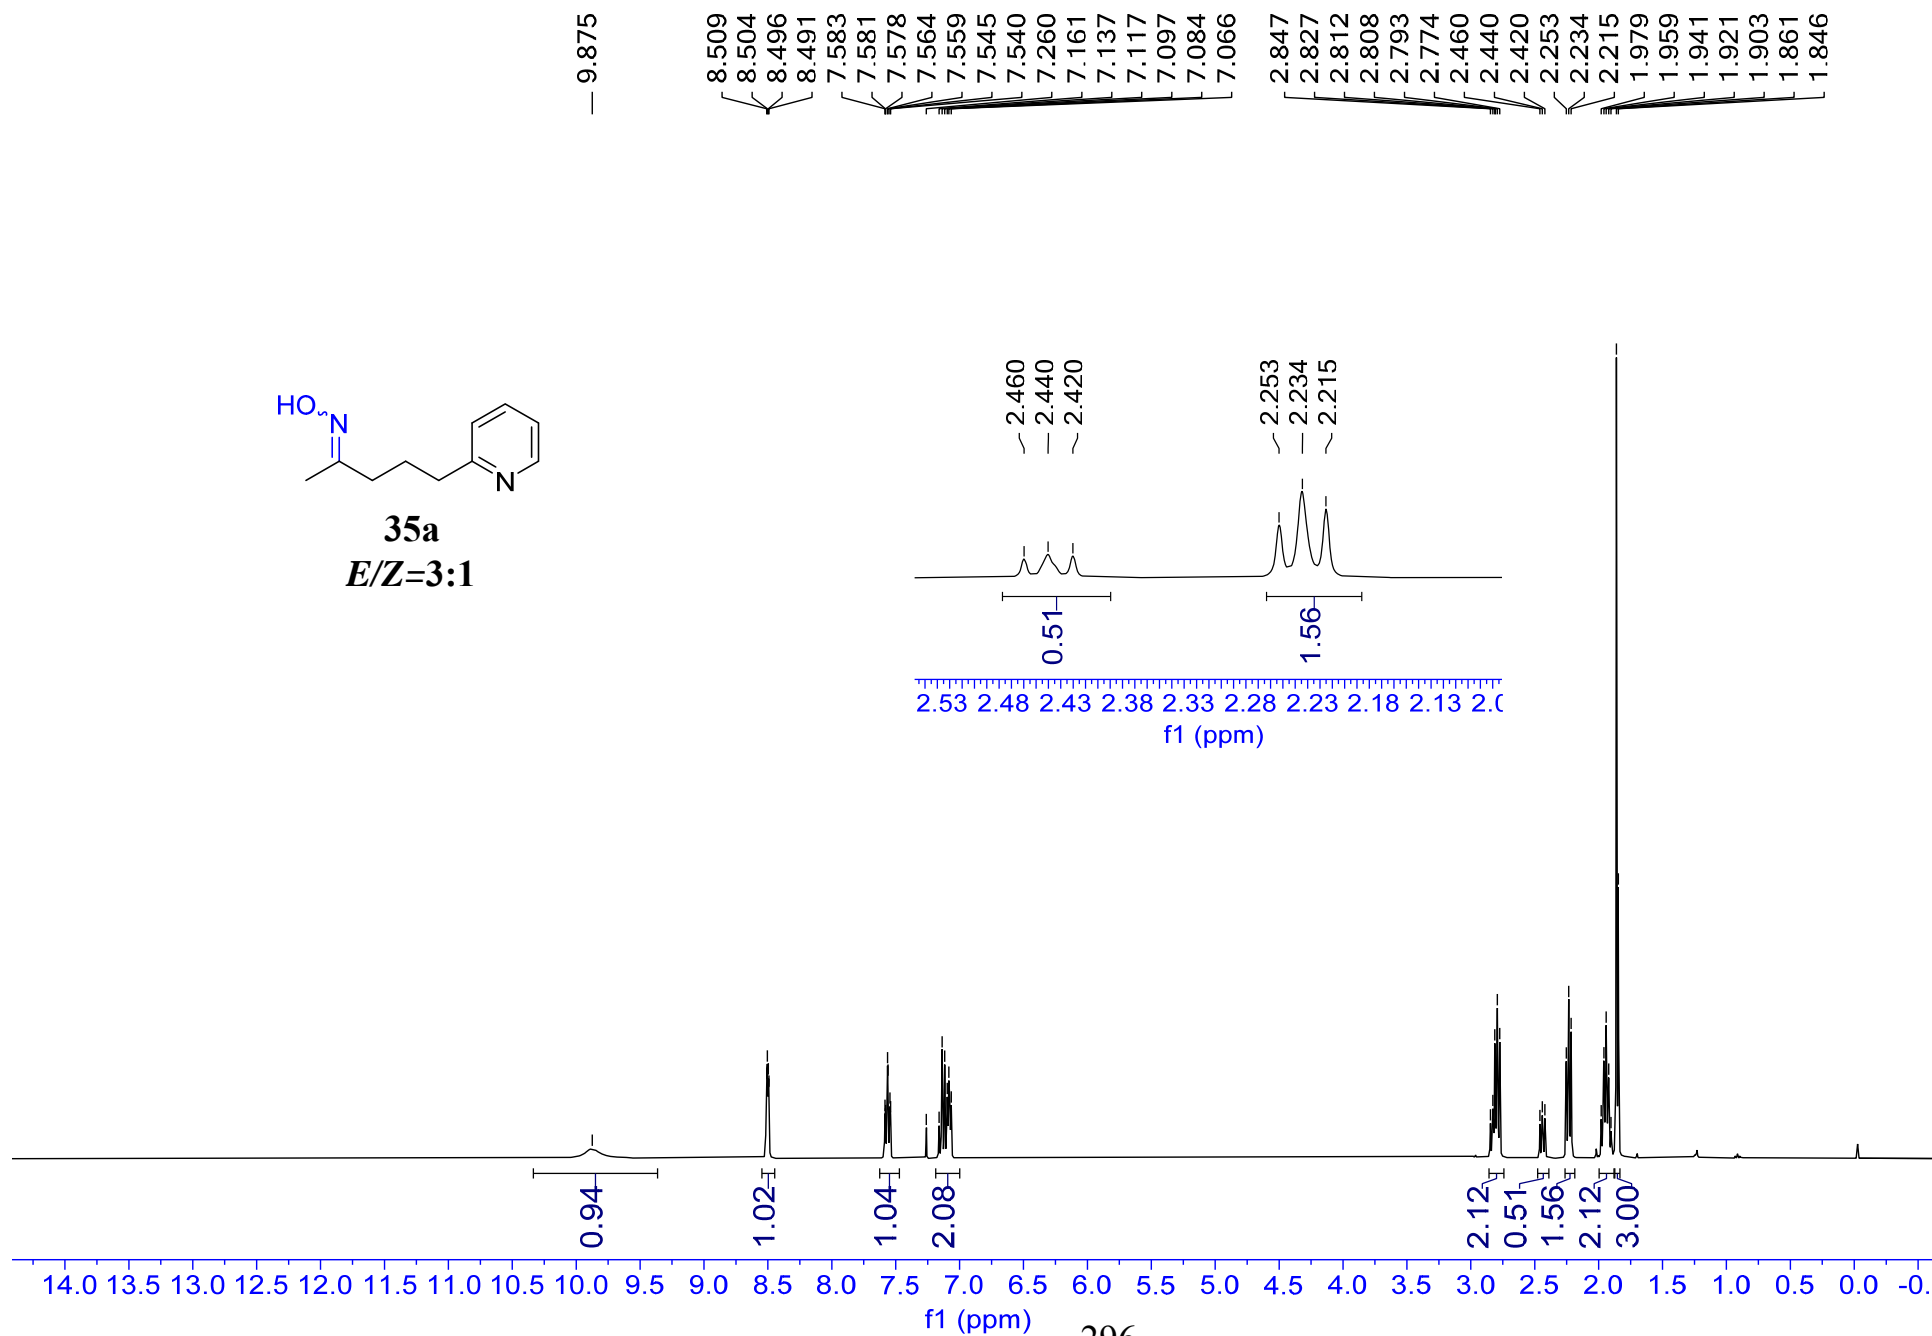

<sup>13</sup>C NMR 101 MHz, CDCl<sub>3</sub>



**35a**  
*E/Z=3:1*

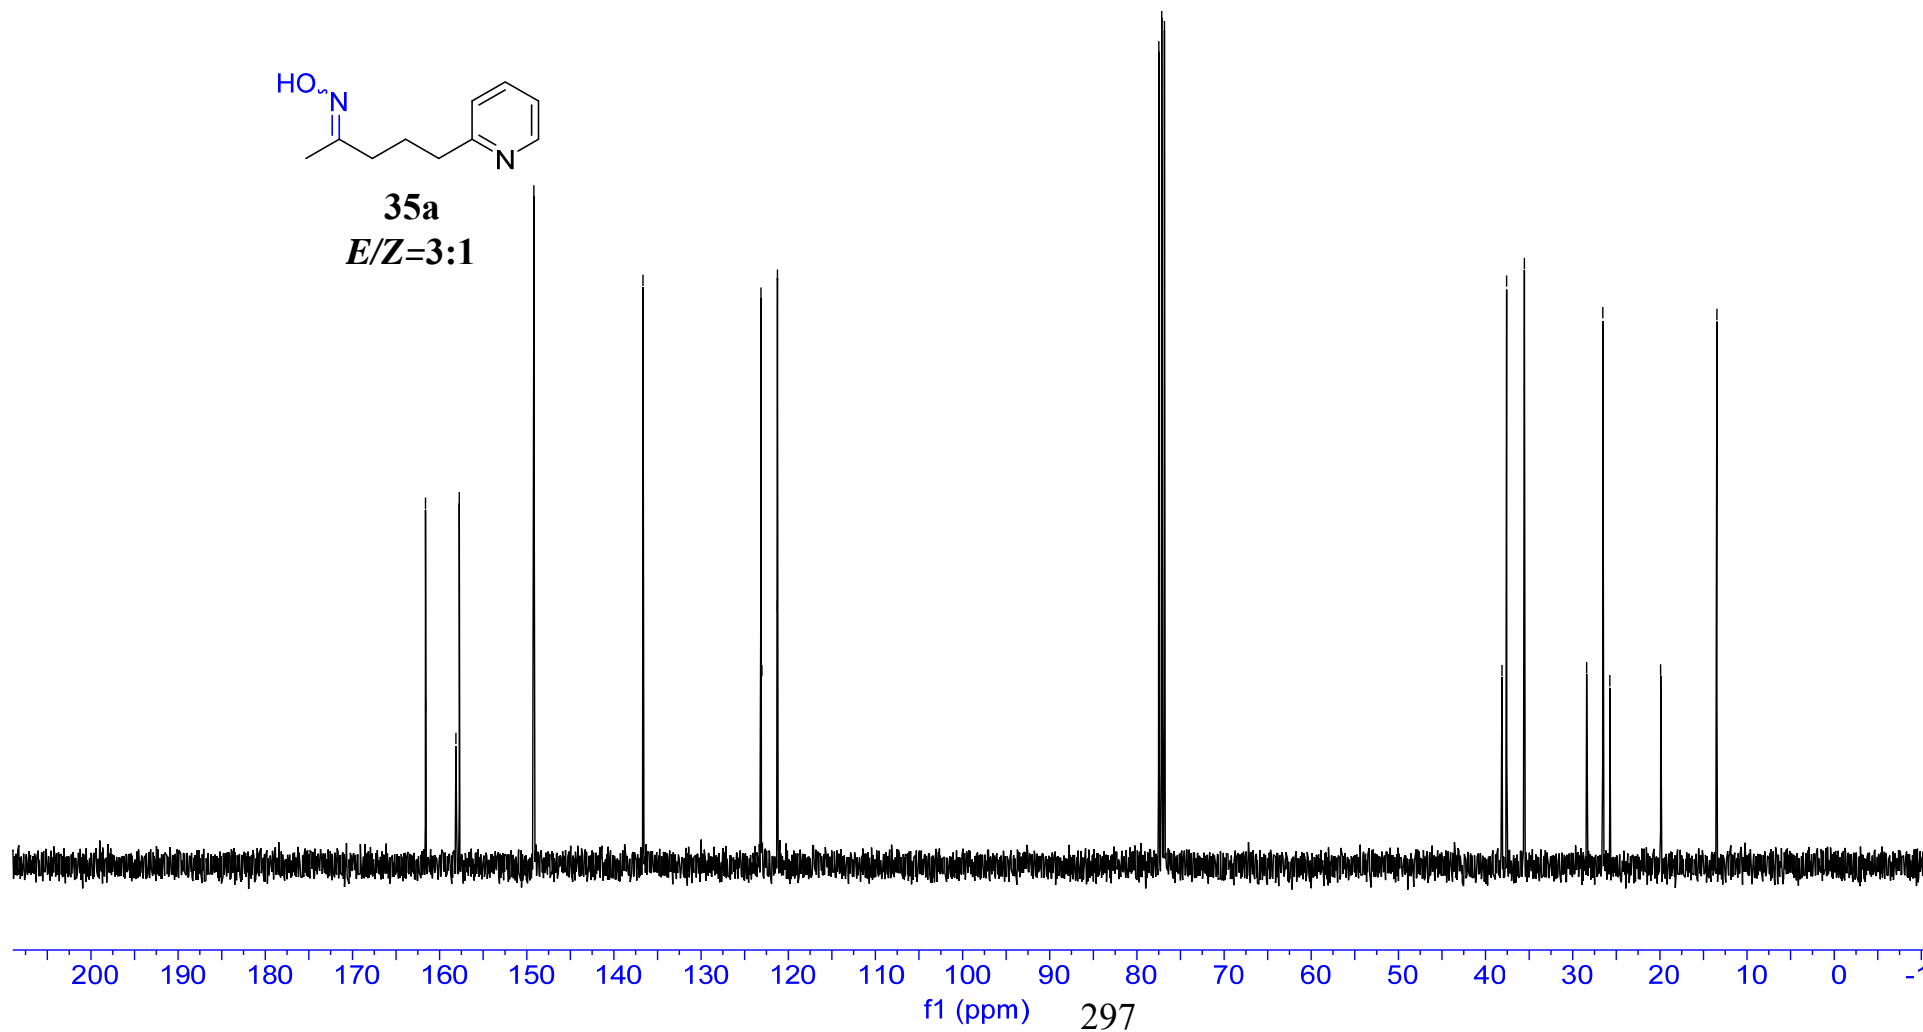

<sup>1</sup>H NMR, 400 MHz, CDCl<sub>3</sub>

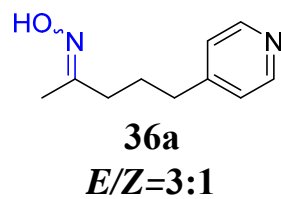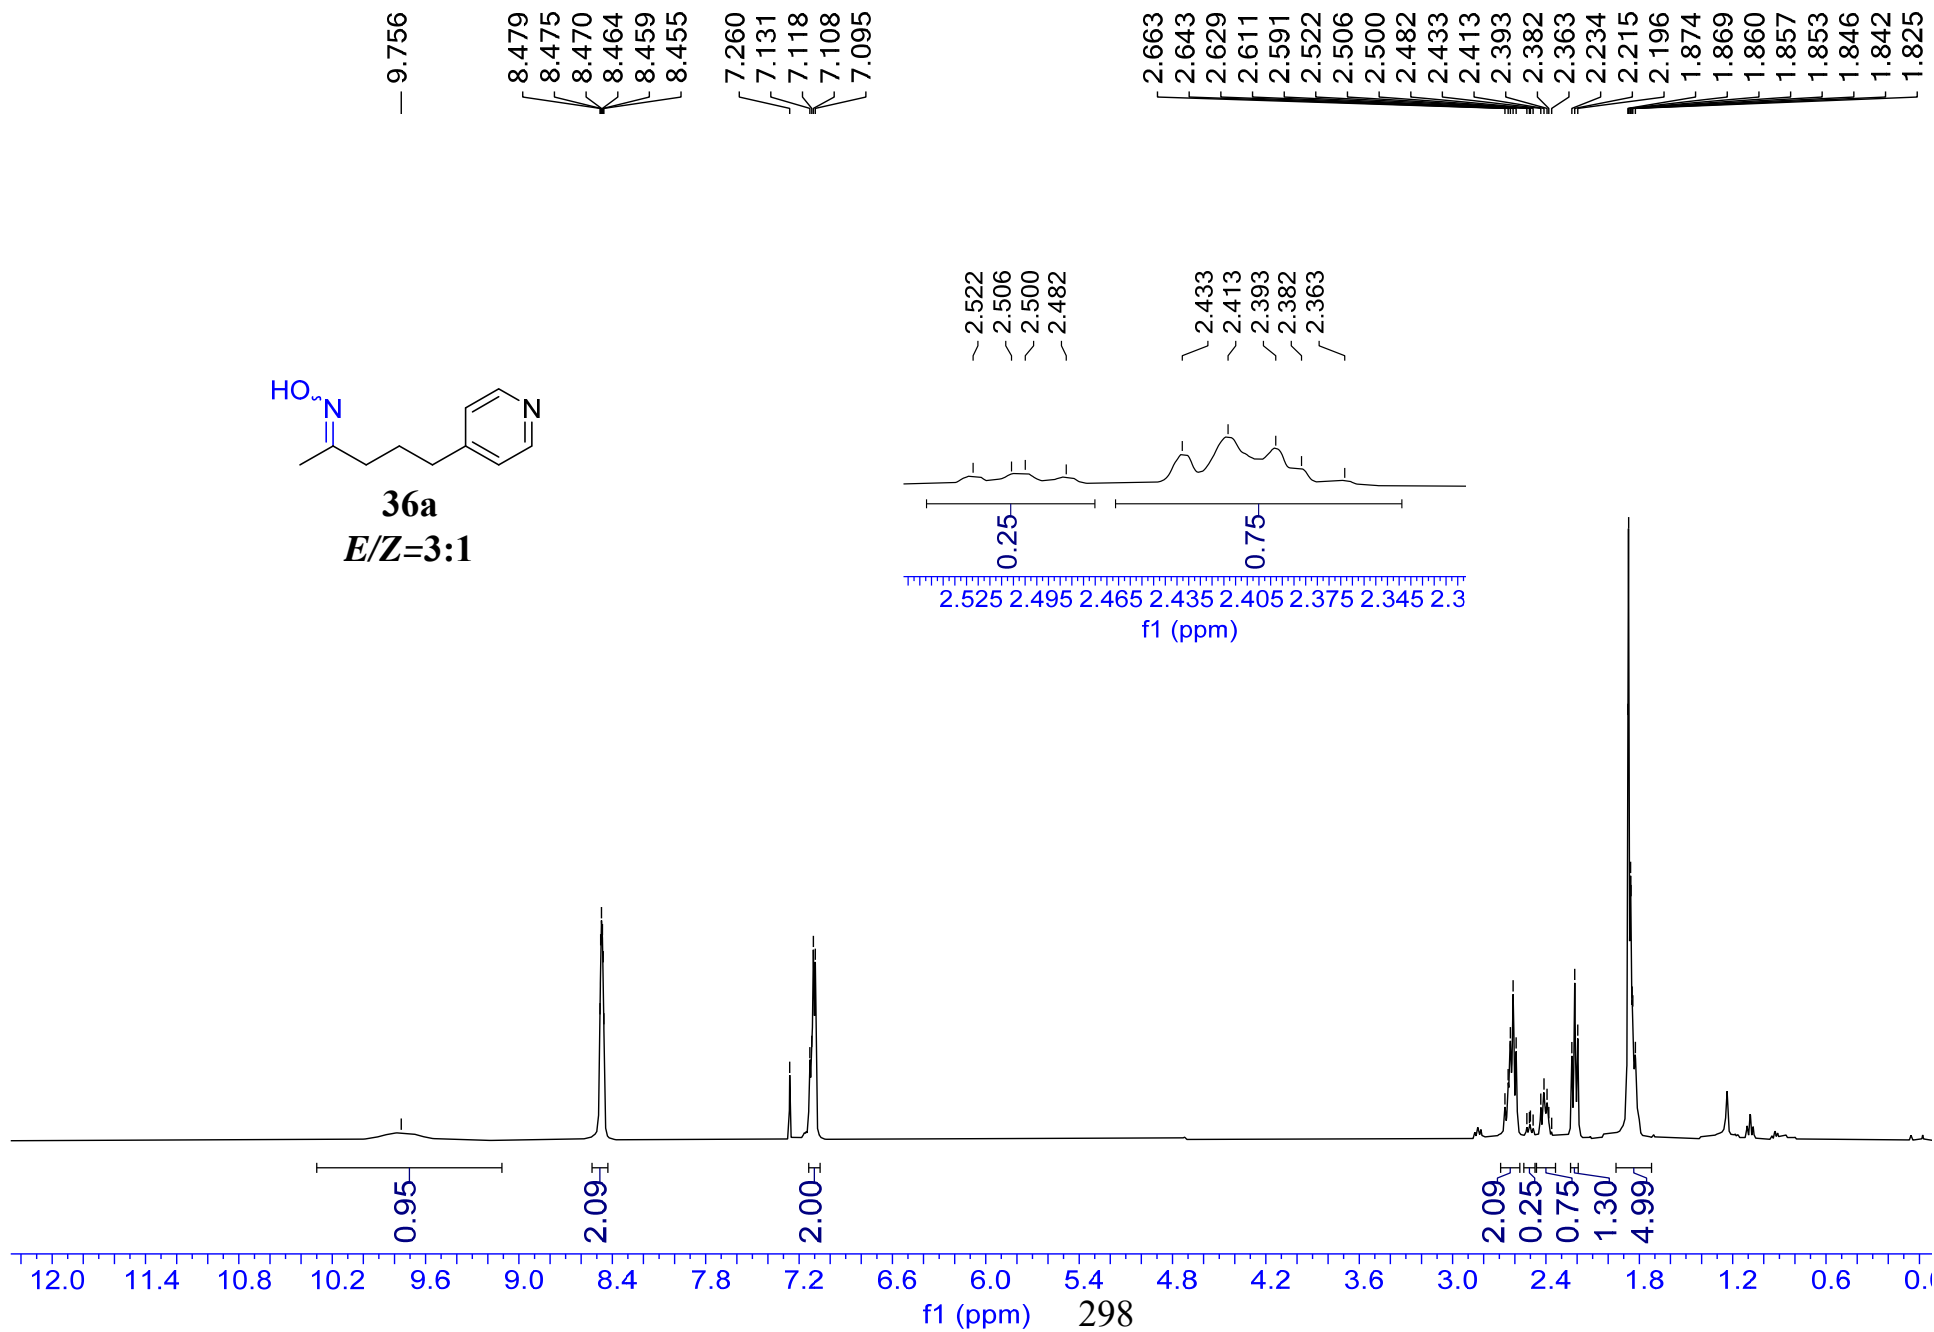

<sup>13</sup>C NMR 101 MHz, CDCl<sub>3</sub>

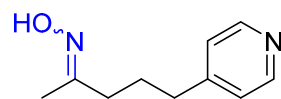

**36a**  
*E/Z*=3:1

157.36  
151.22  
149.57

124.10  
124.04

77.48  
77.16  
76.84

35.28  
35.19  
34.60  
28.32  
26.82  
26.14  
20.01  
13.57

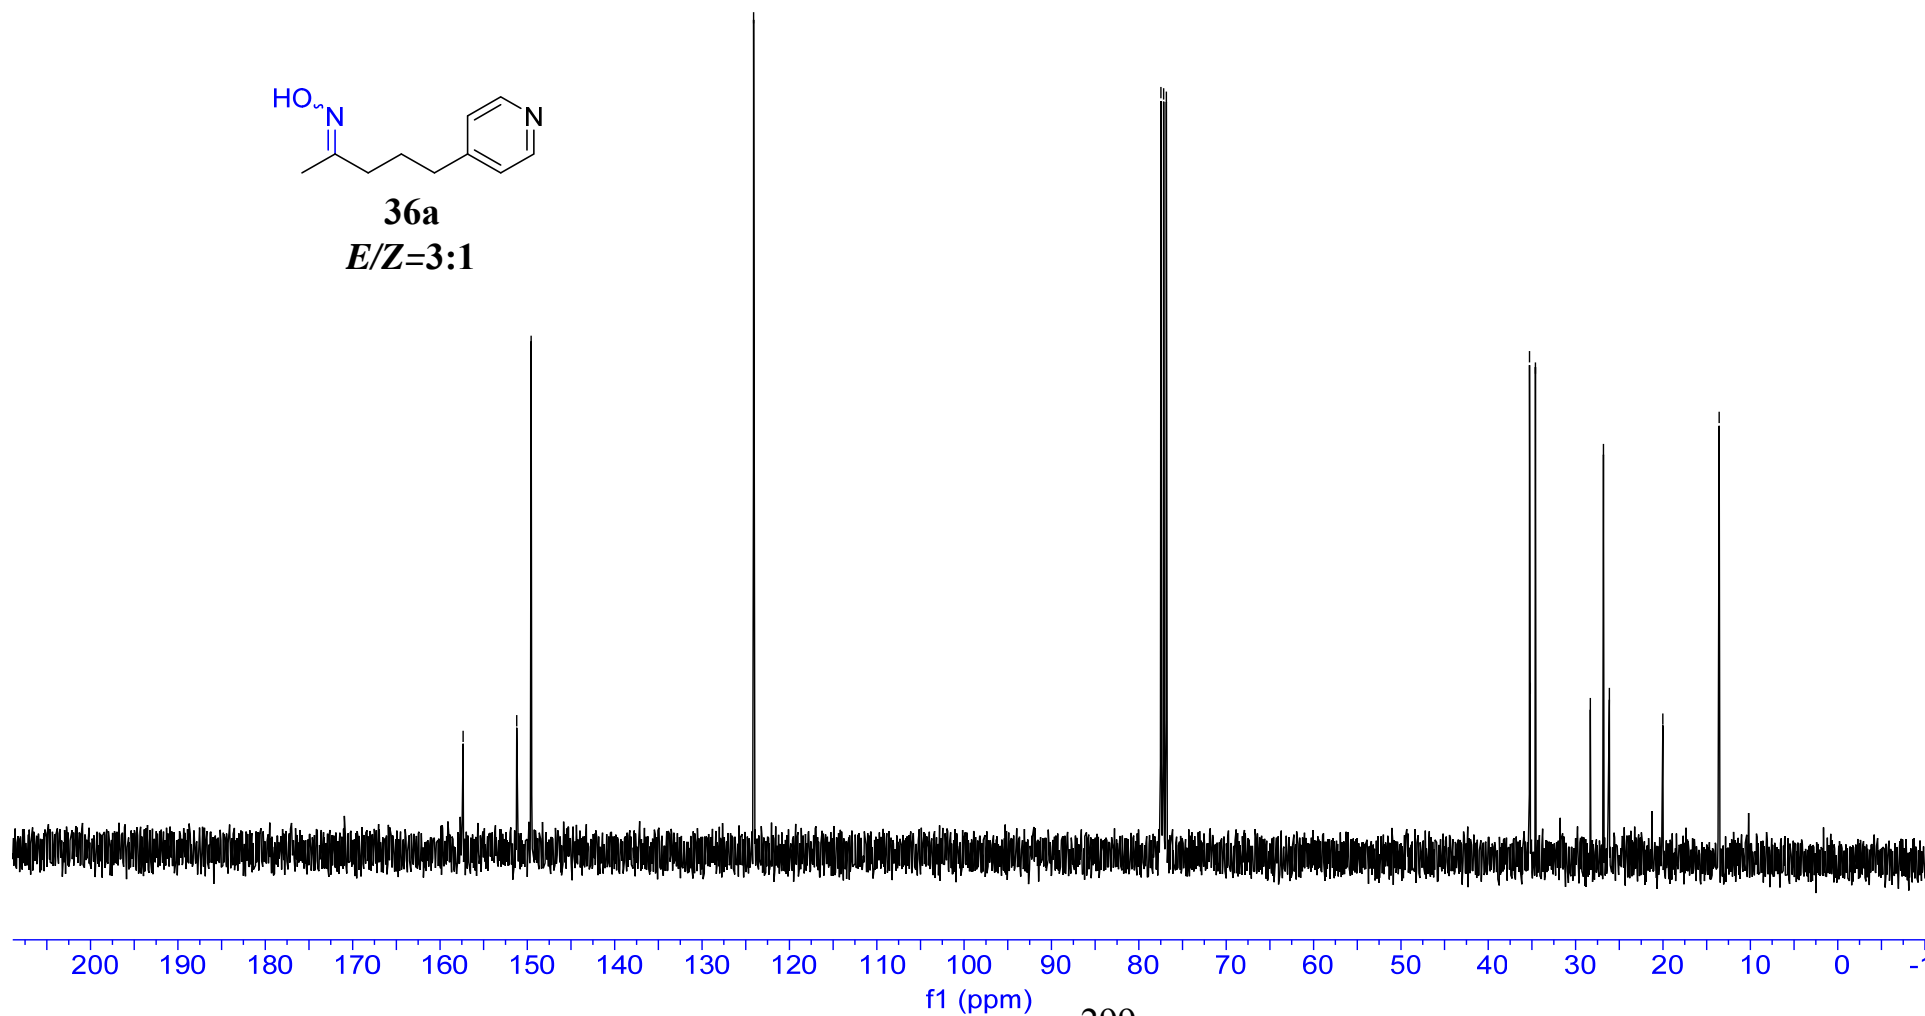

<sup>1</sup>H NMR, 400 MHz, CDCl<sub>3</sub>

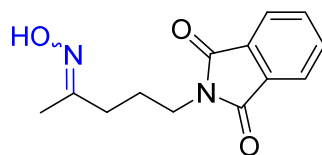

**37a**  
*E/Z*=3:1

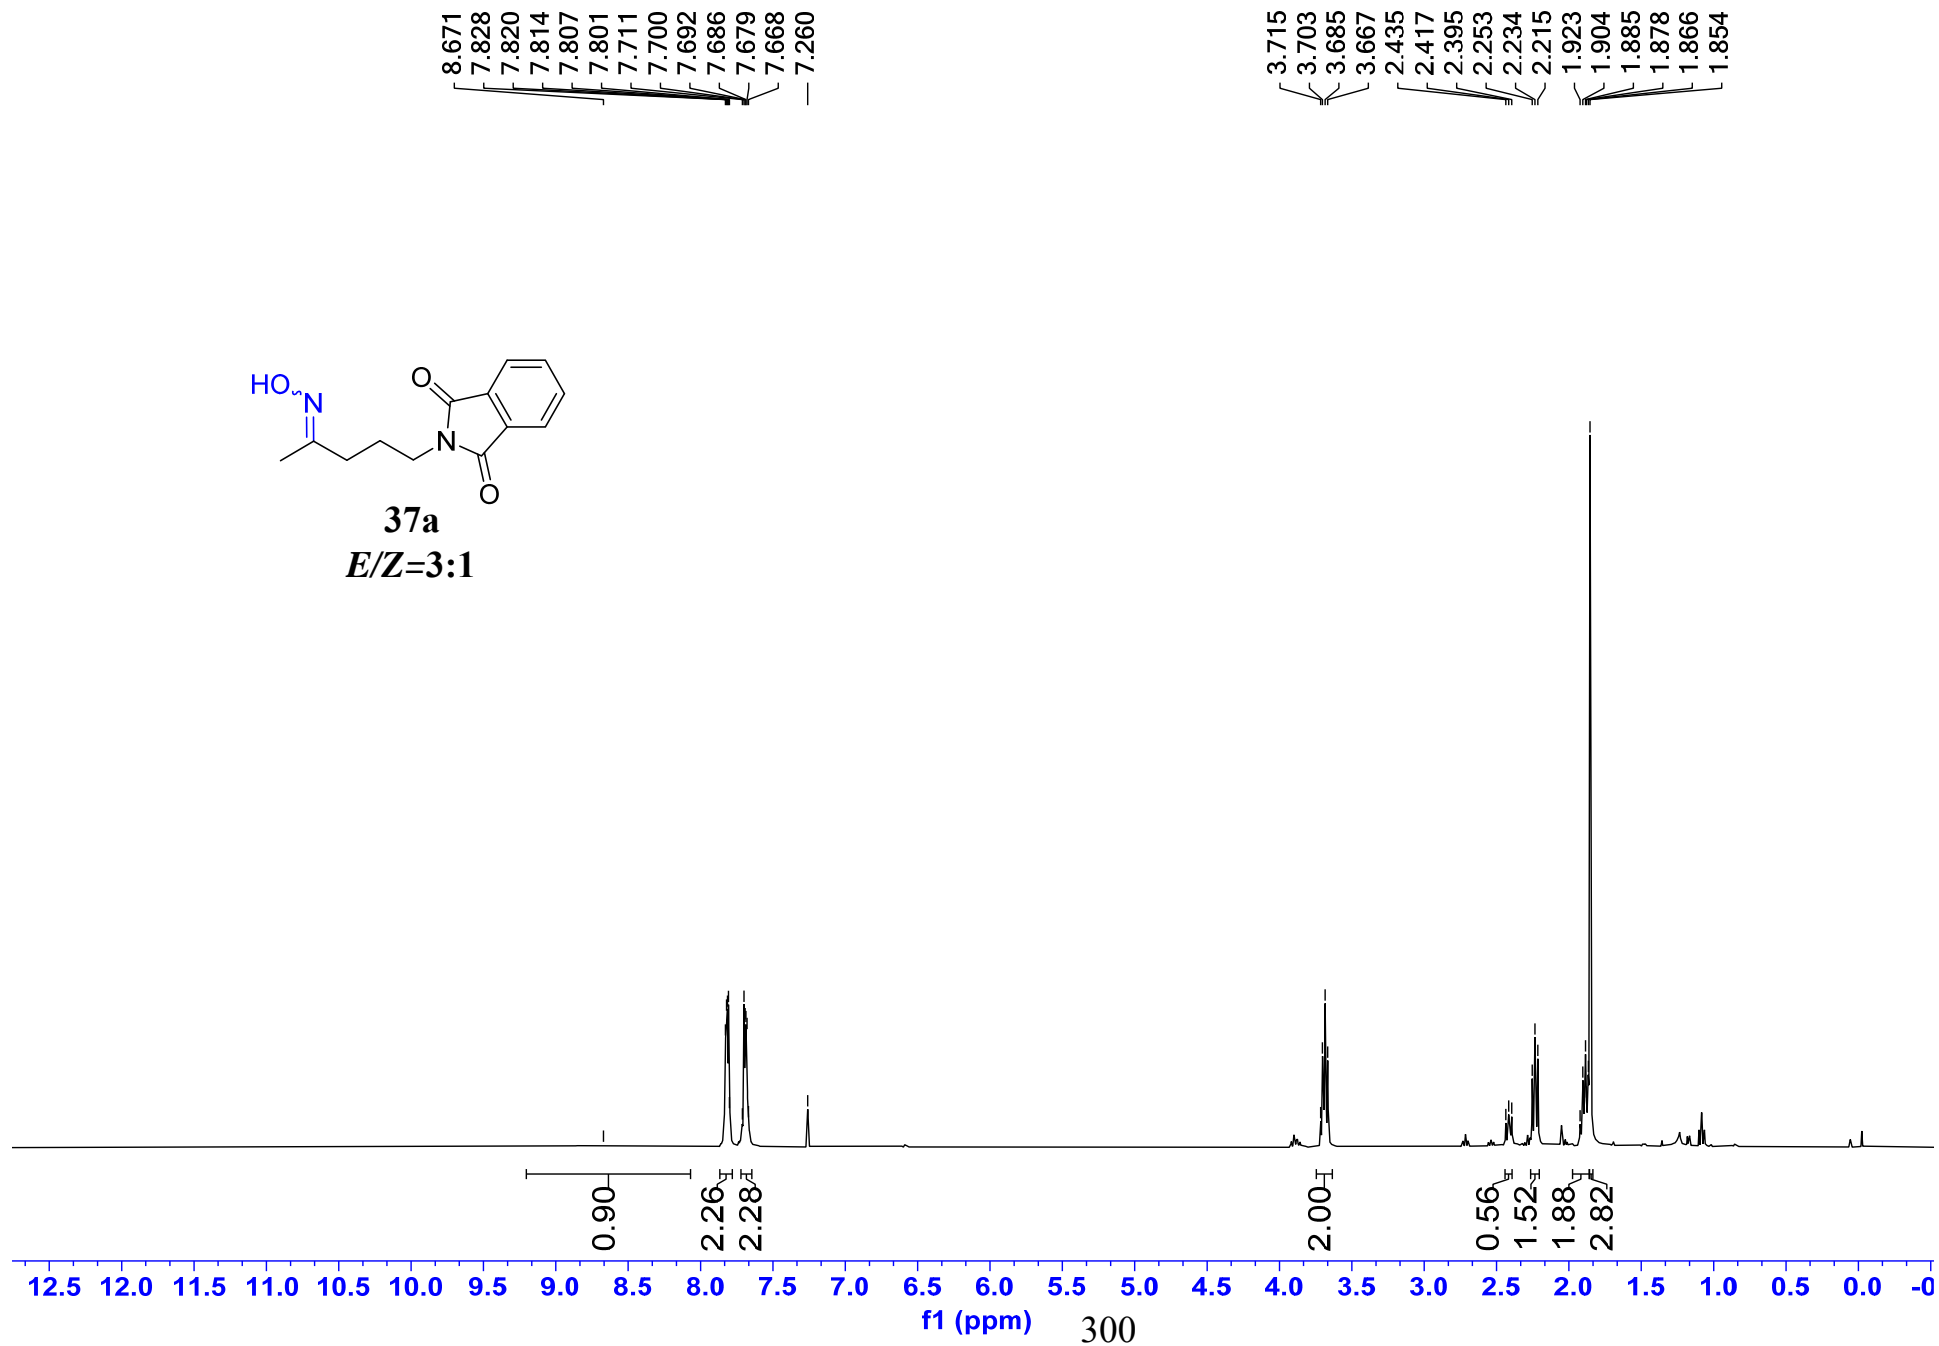



$^{13}\text{C}$  NMR 101 MHz,  $\text{CDCl}_3$



**37a**  
*E/Z*=3:1

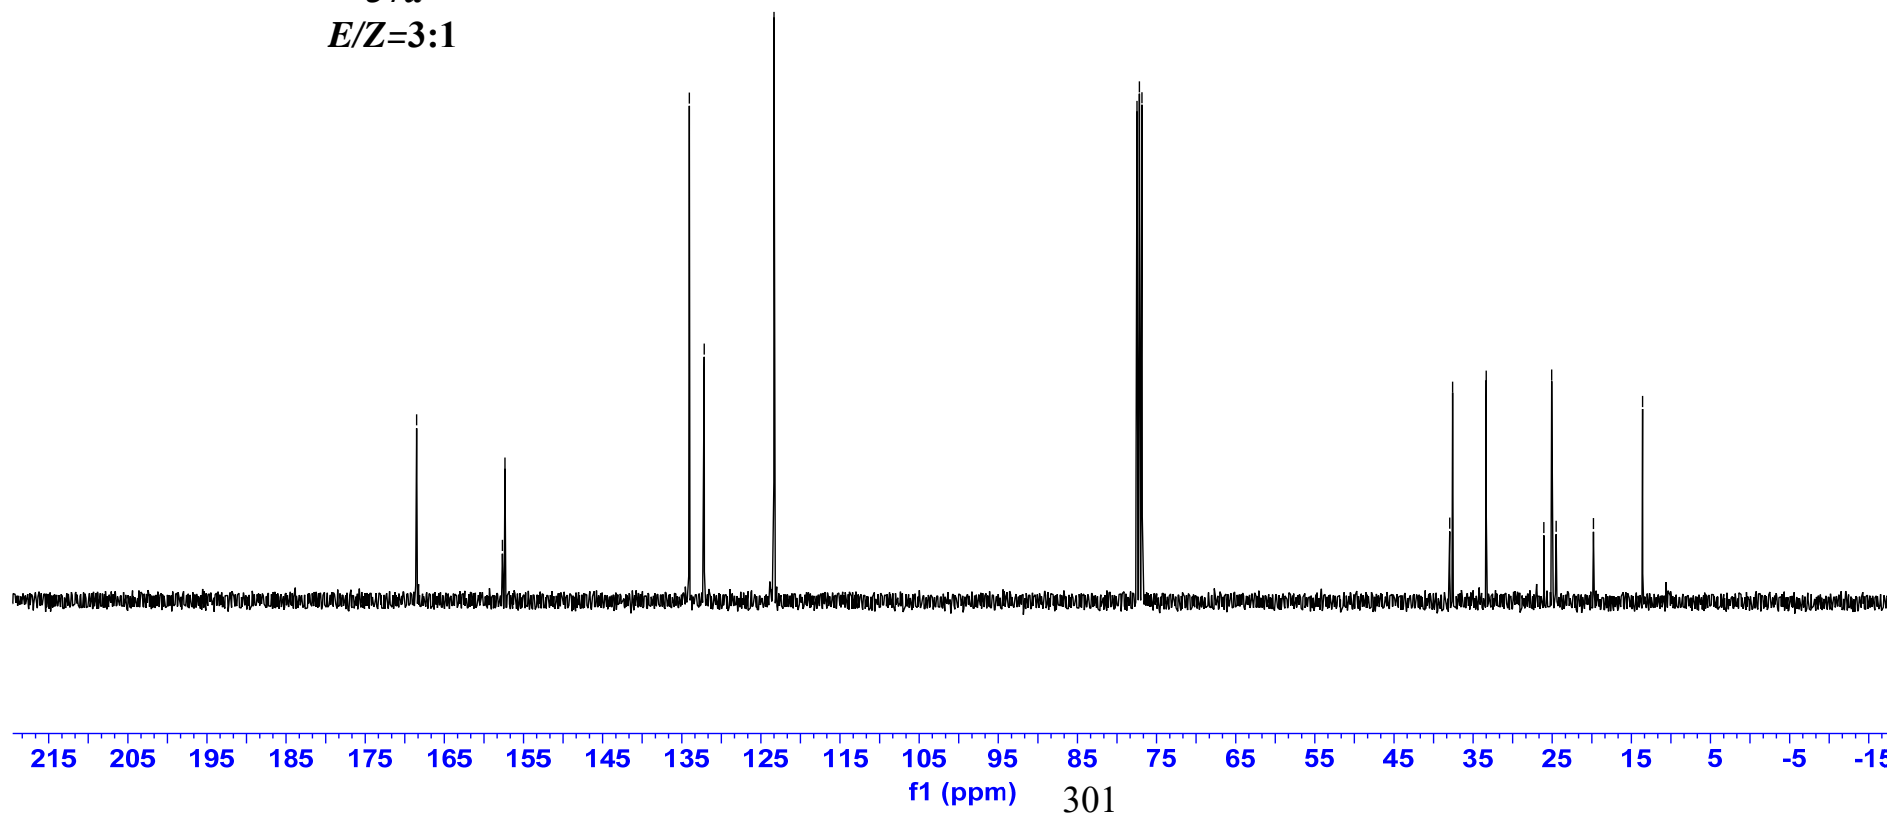

<sup>1</sup>H NMR, 400 MHz, CDCl<sub>3</sub>

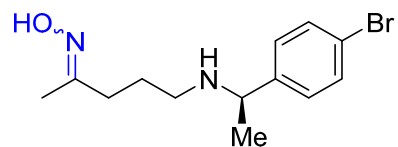

**38a**  
*E/Z*=3:1

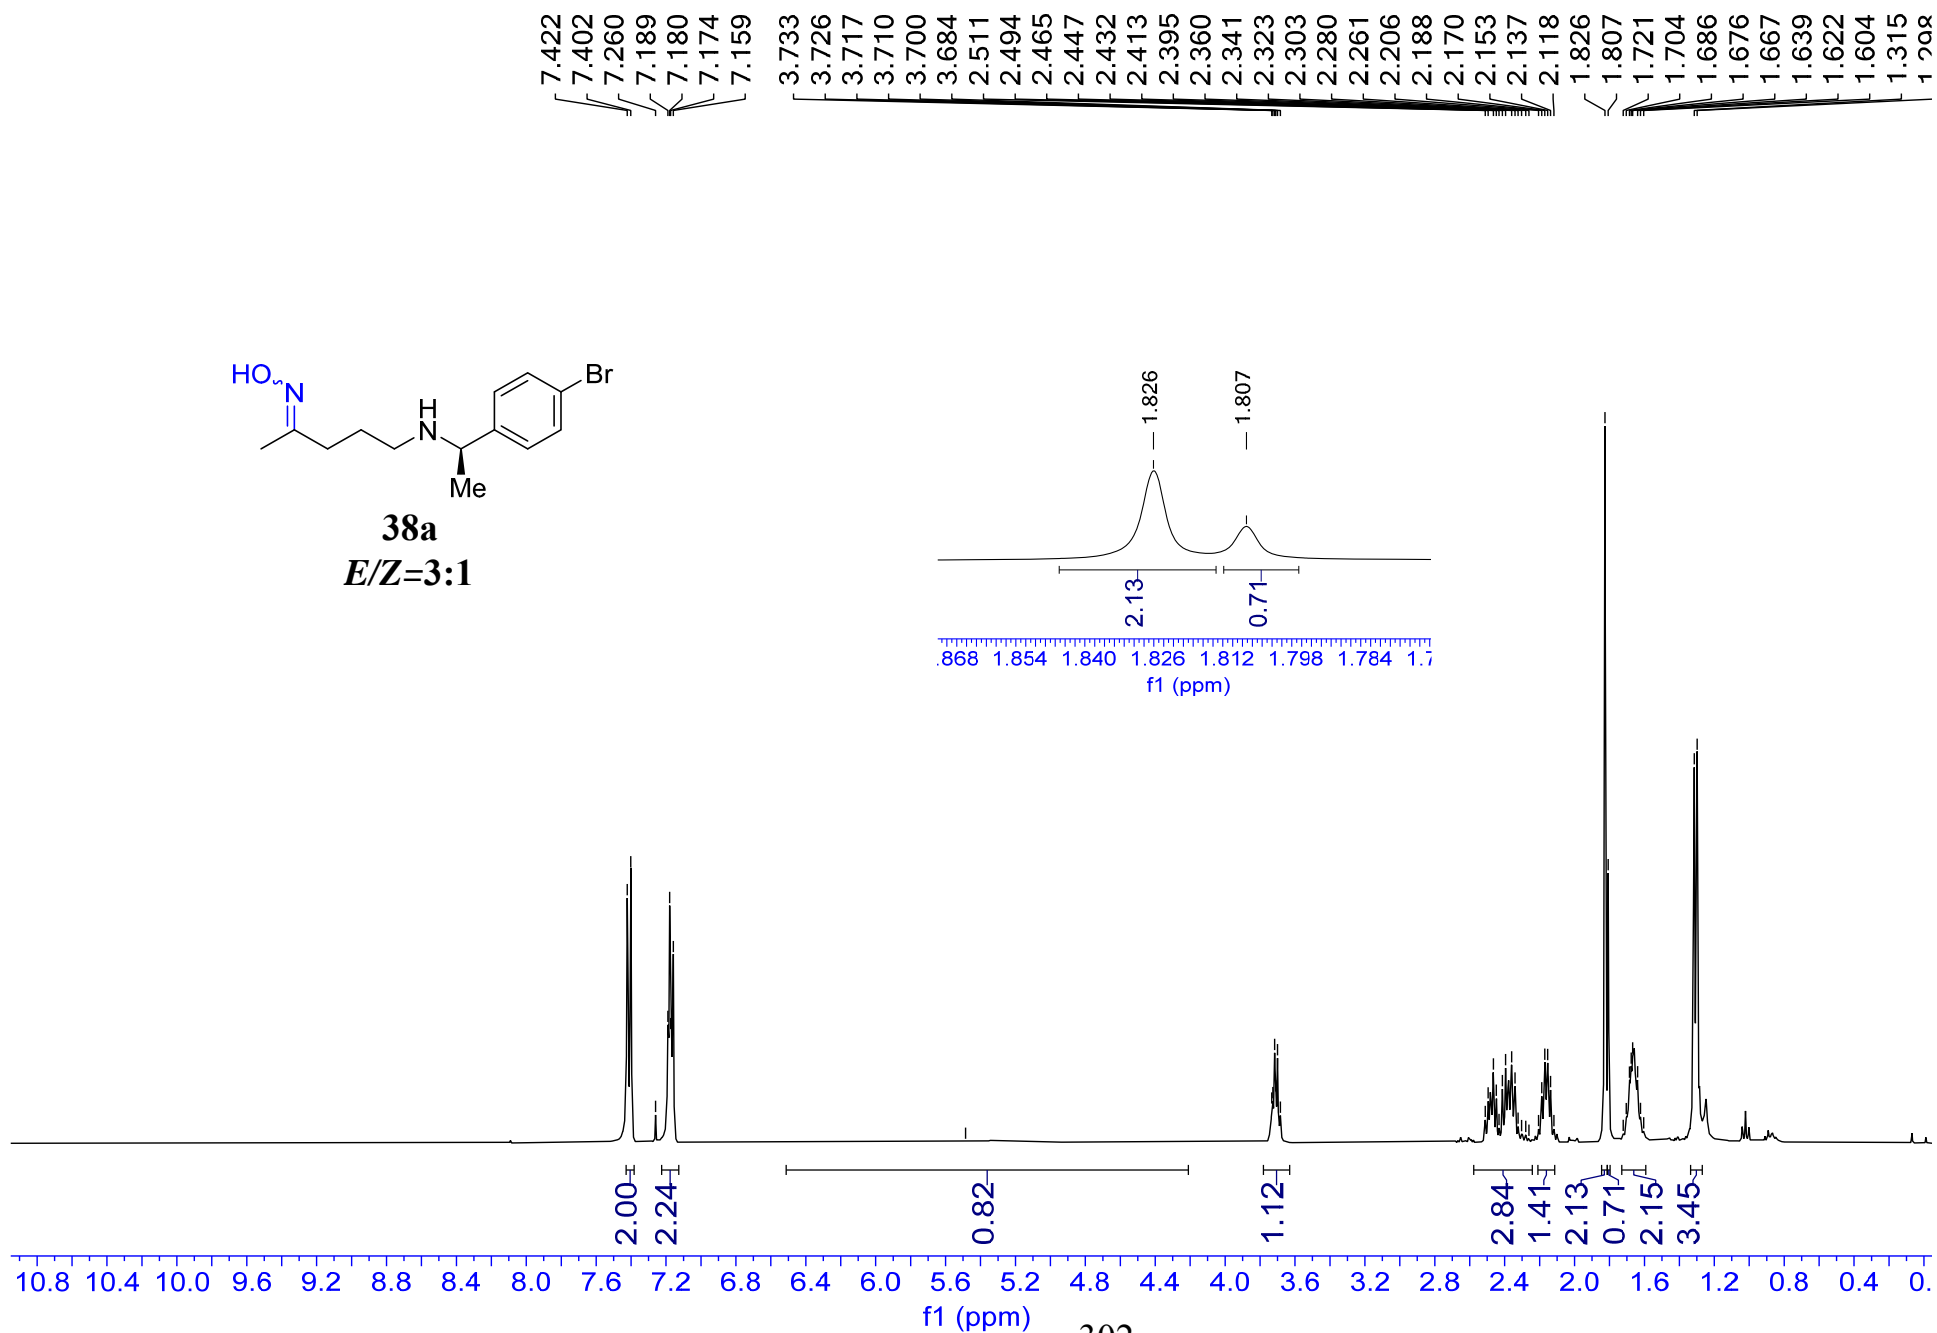

<sup>13</sup>C NMR 101 MHz, CDCl<sub>3</sub>

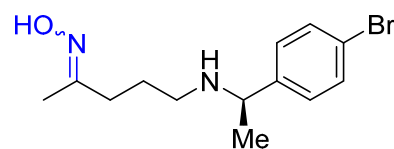

**38a**  
*E/Z=3:1*

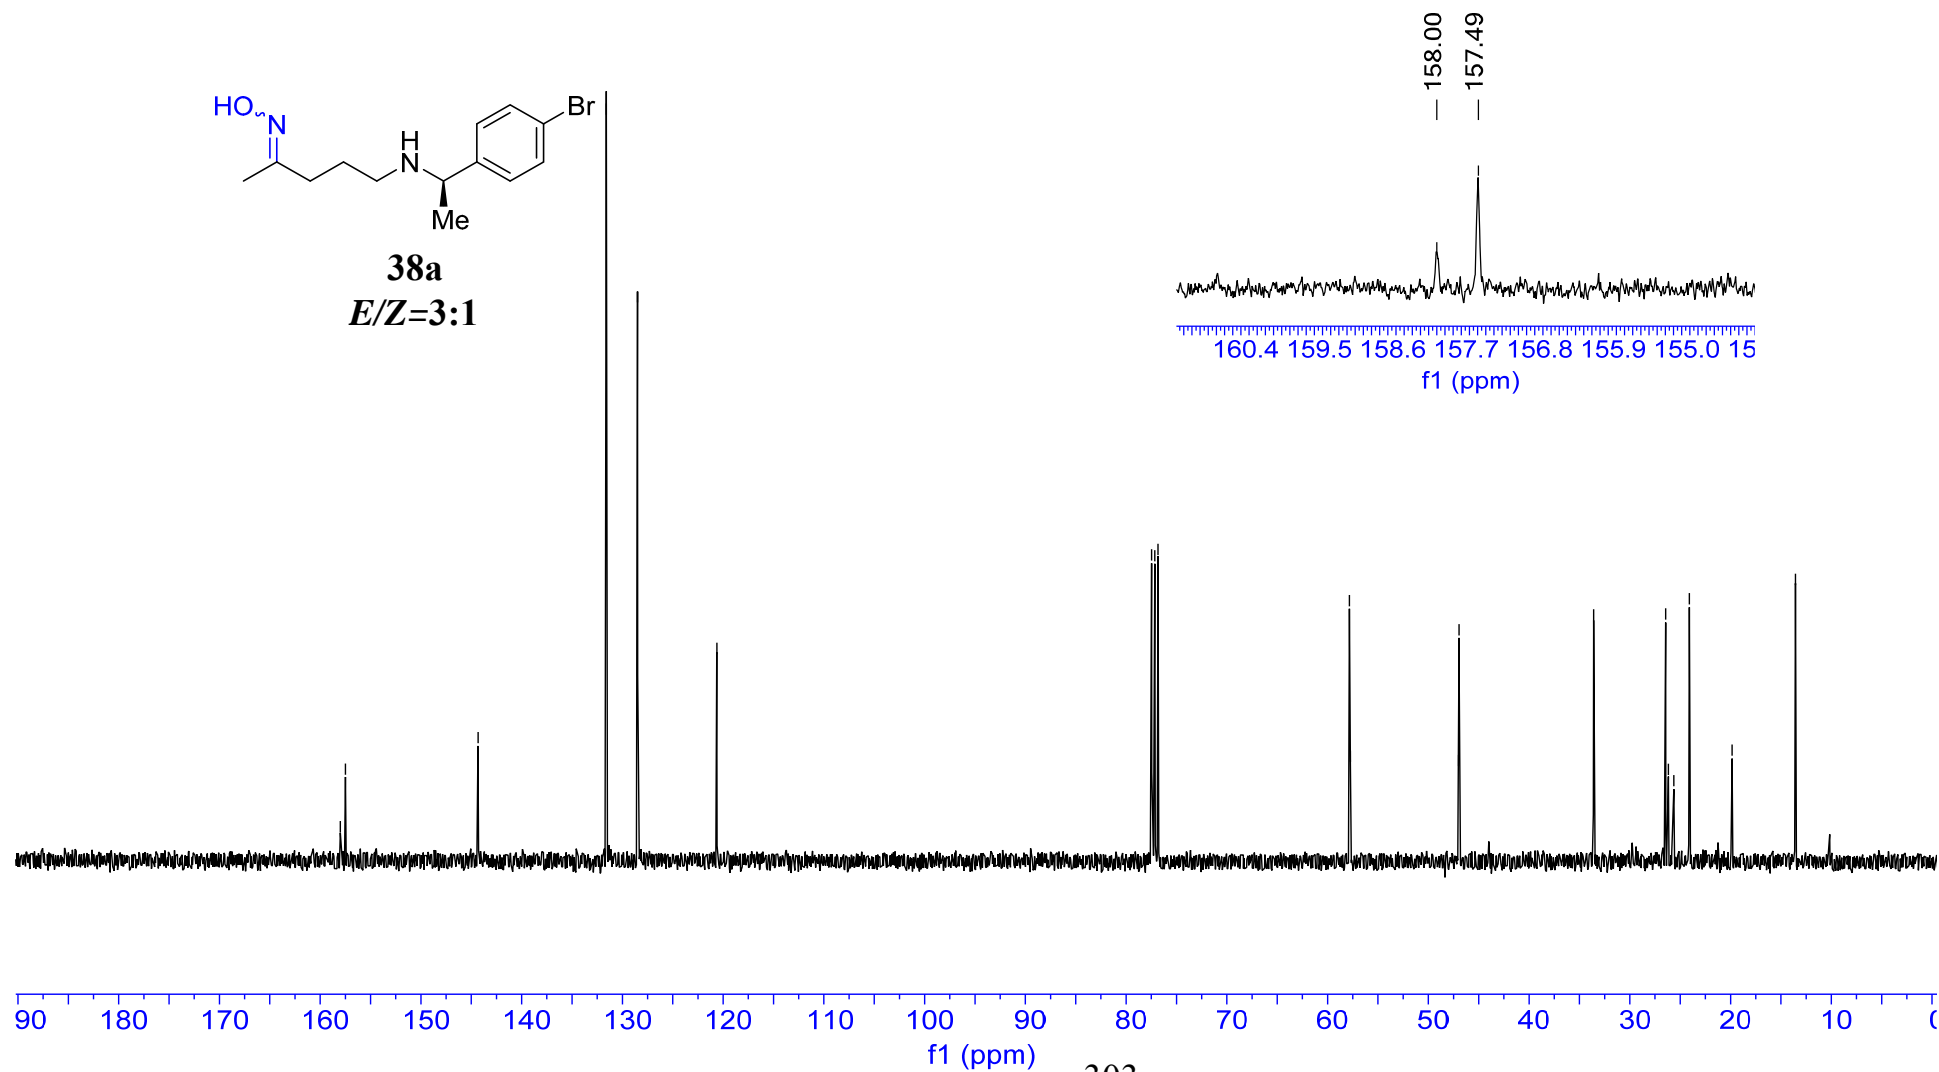

<sup>1</sup>H NMR, 400 MHz, CDCl<sub>3</sub>

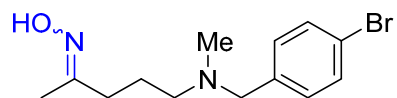

**39a**  
*E/Z*=3:1

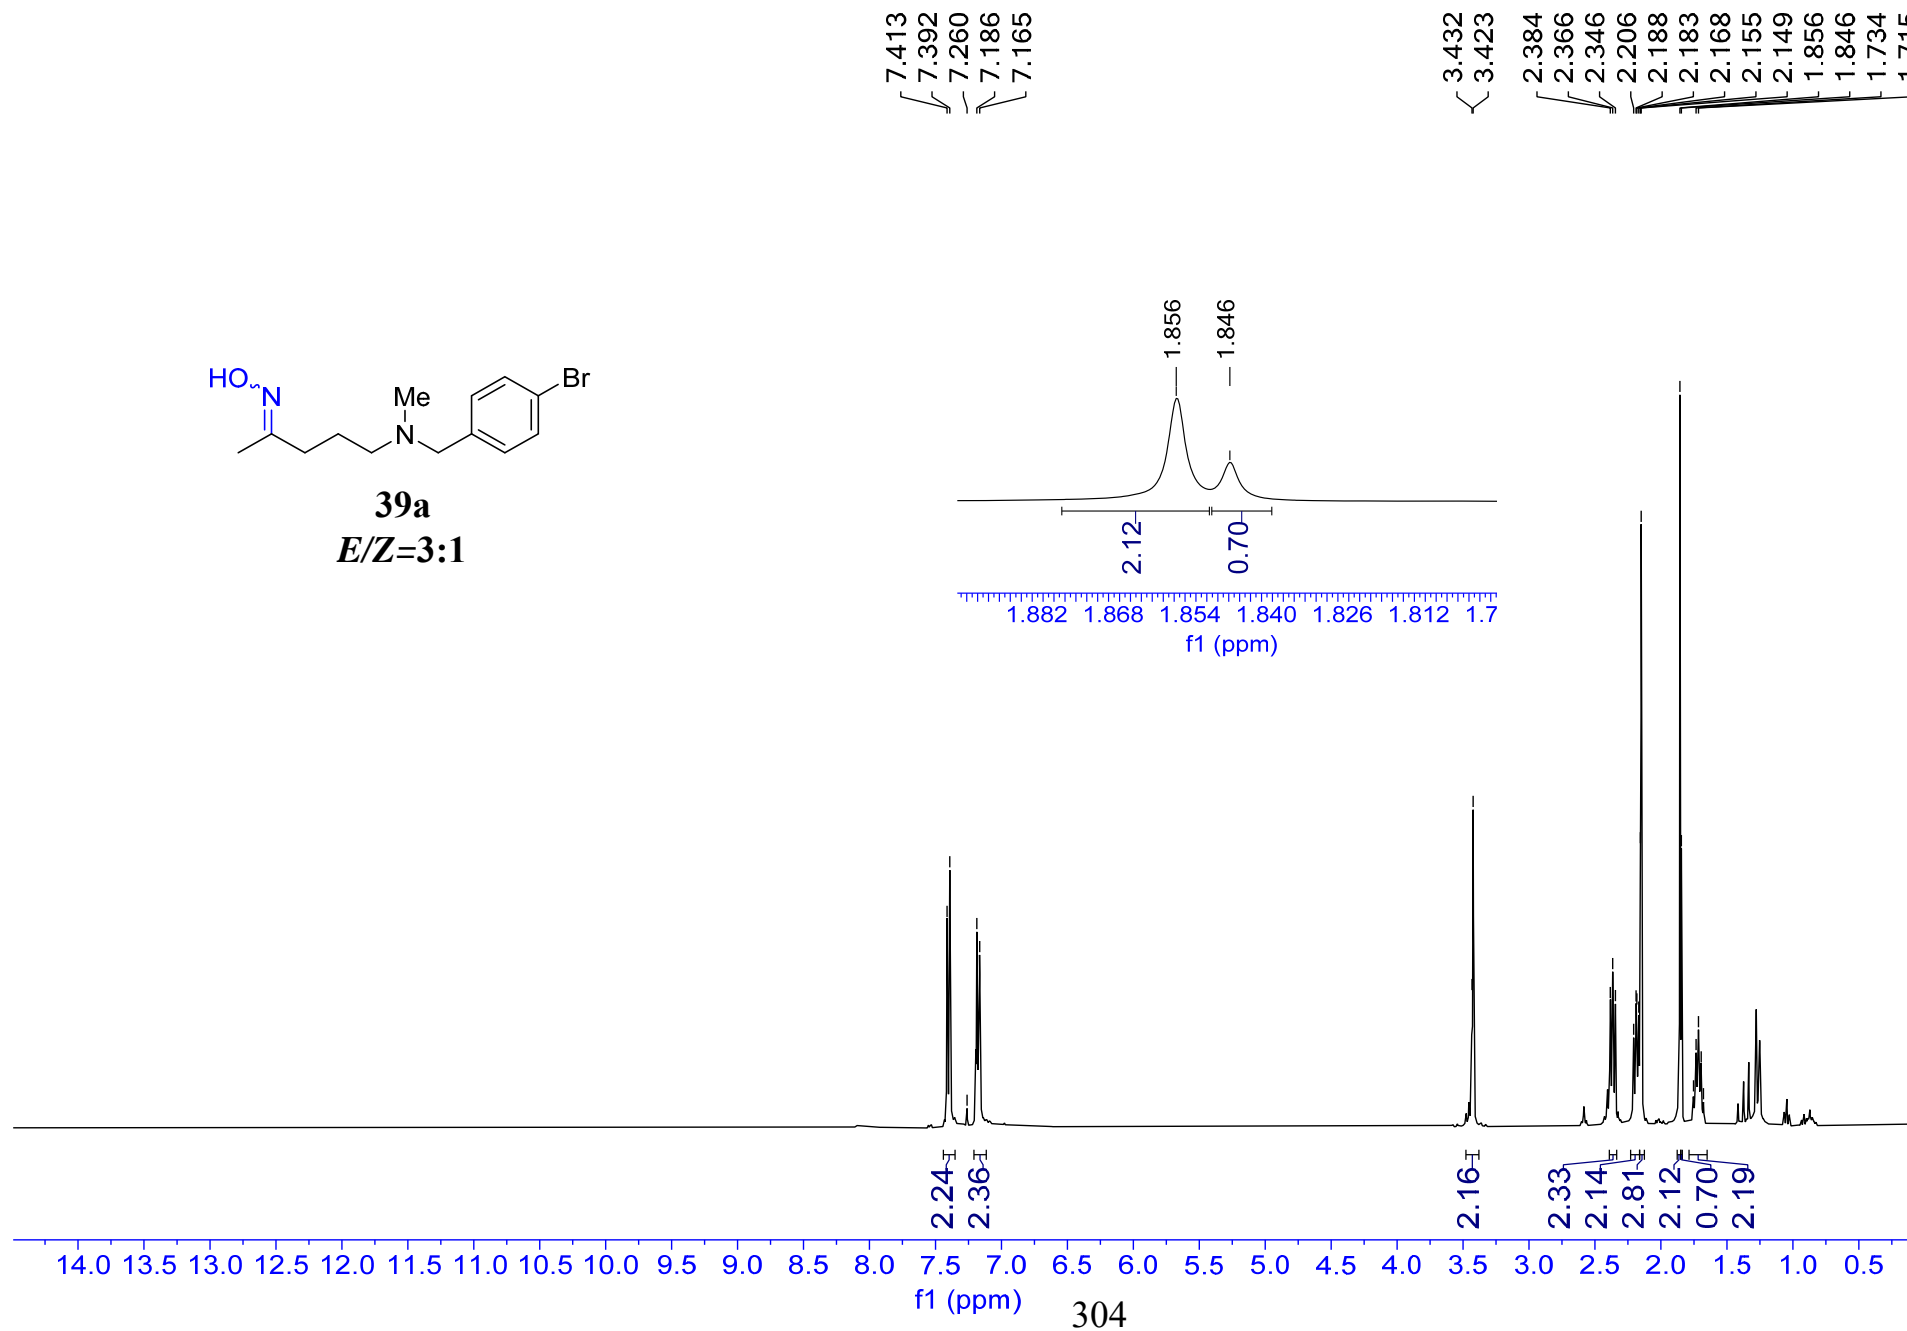

<sup>13</sup>C NMR 101 MHz, CDCl<sub>3</sub>

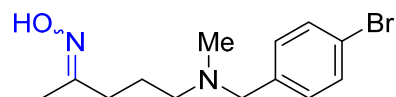

**39a**  
*E/Z=3:1*

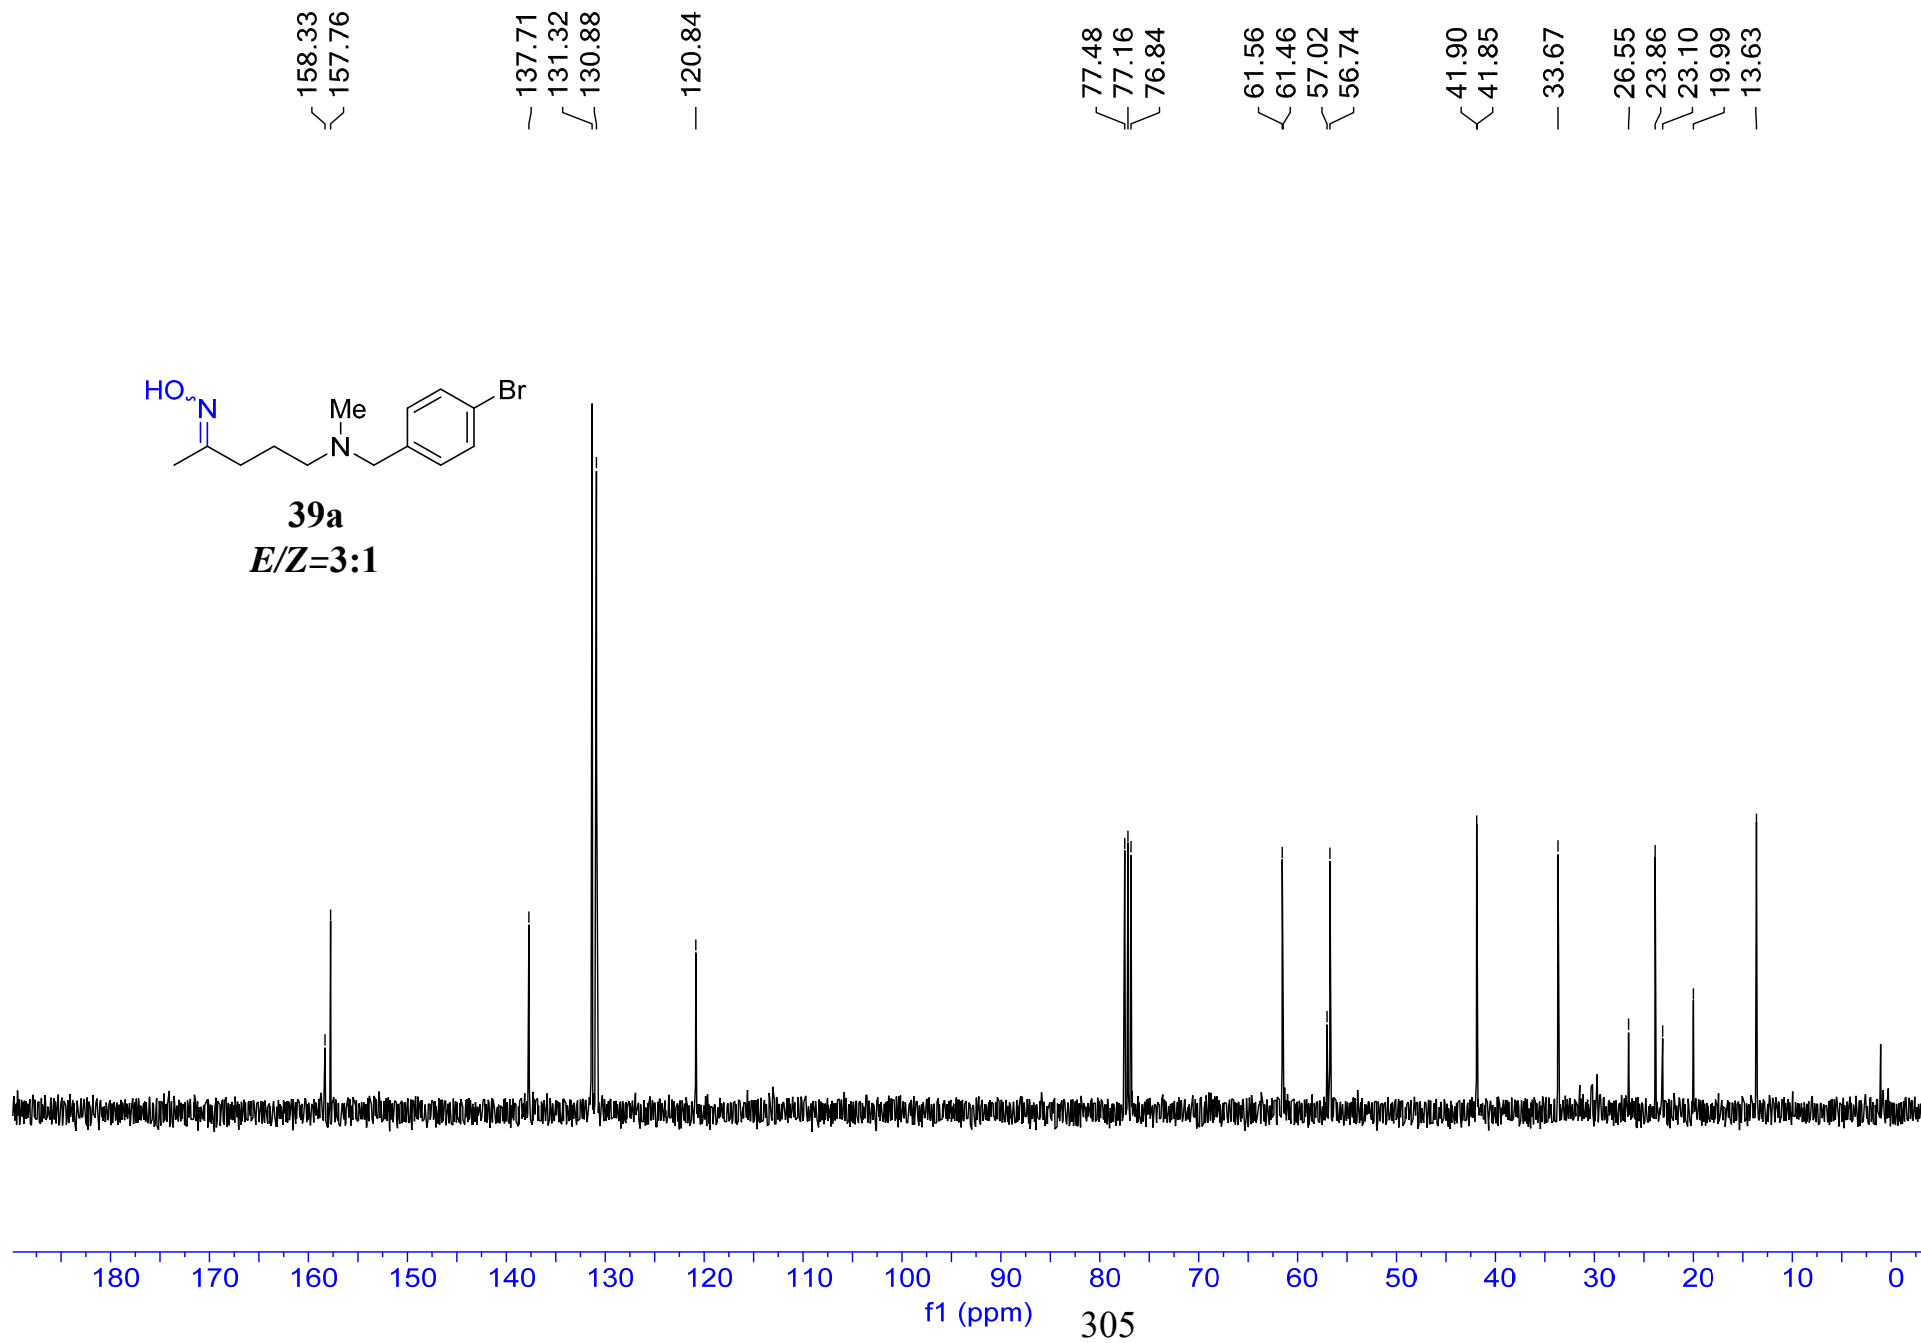

<sup>1</sup>H NMR, 400 MHz, CDCl<sub>3</sub>

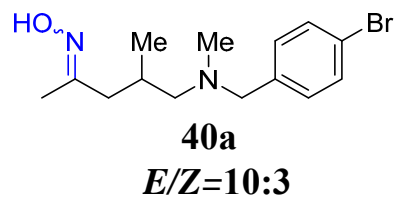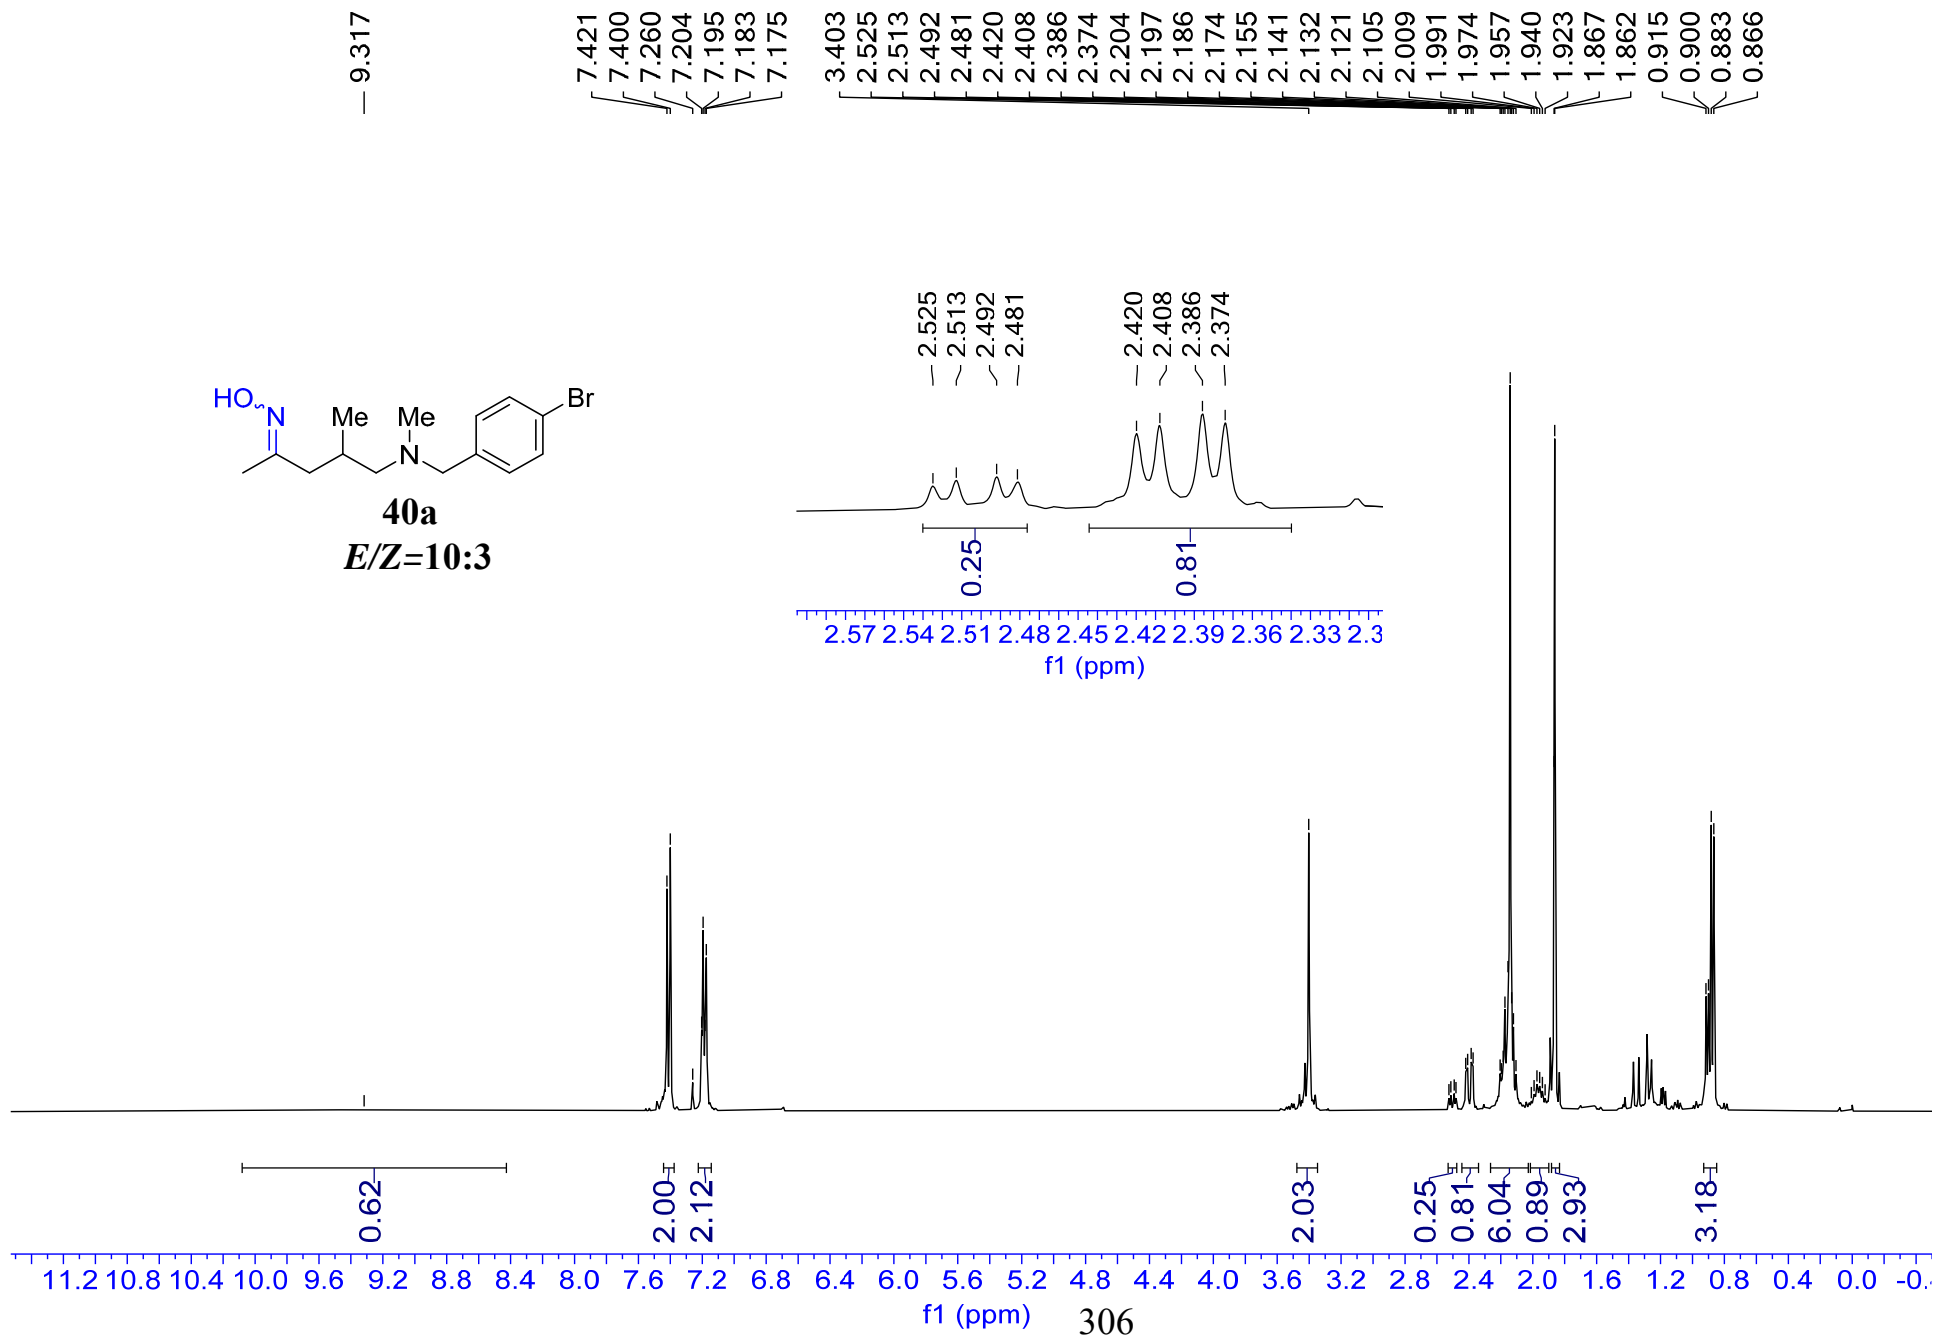

<sup>13</sup>C NMR 101 MHz, CDCl<sub>3</sub>

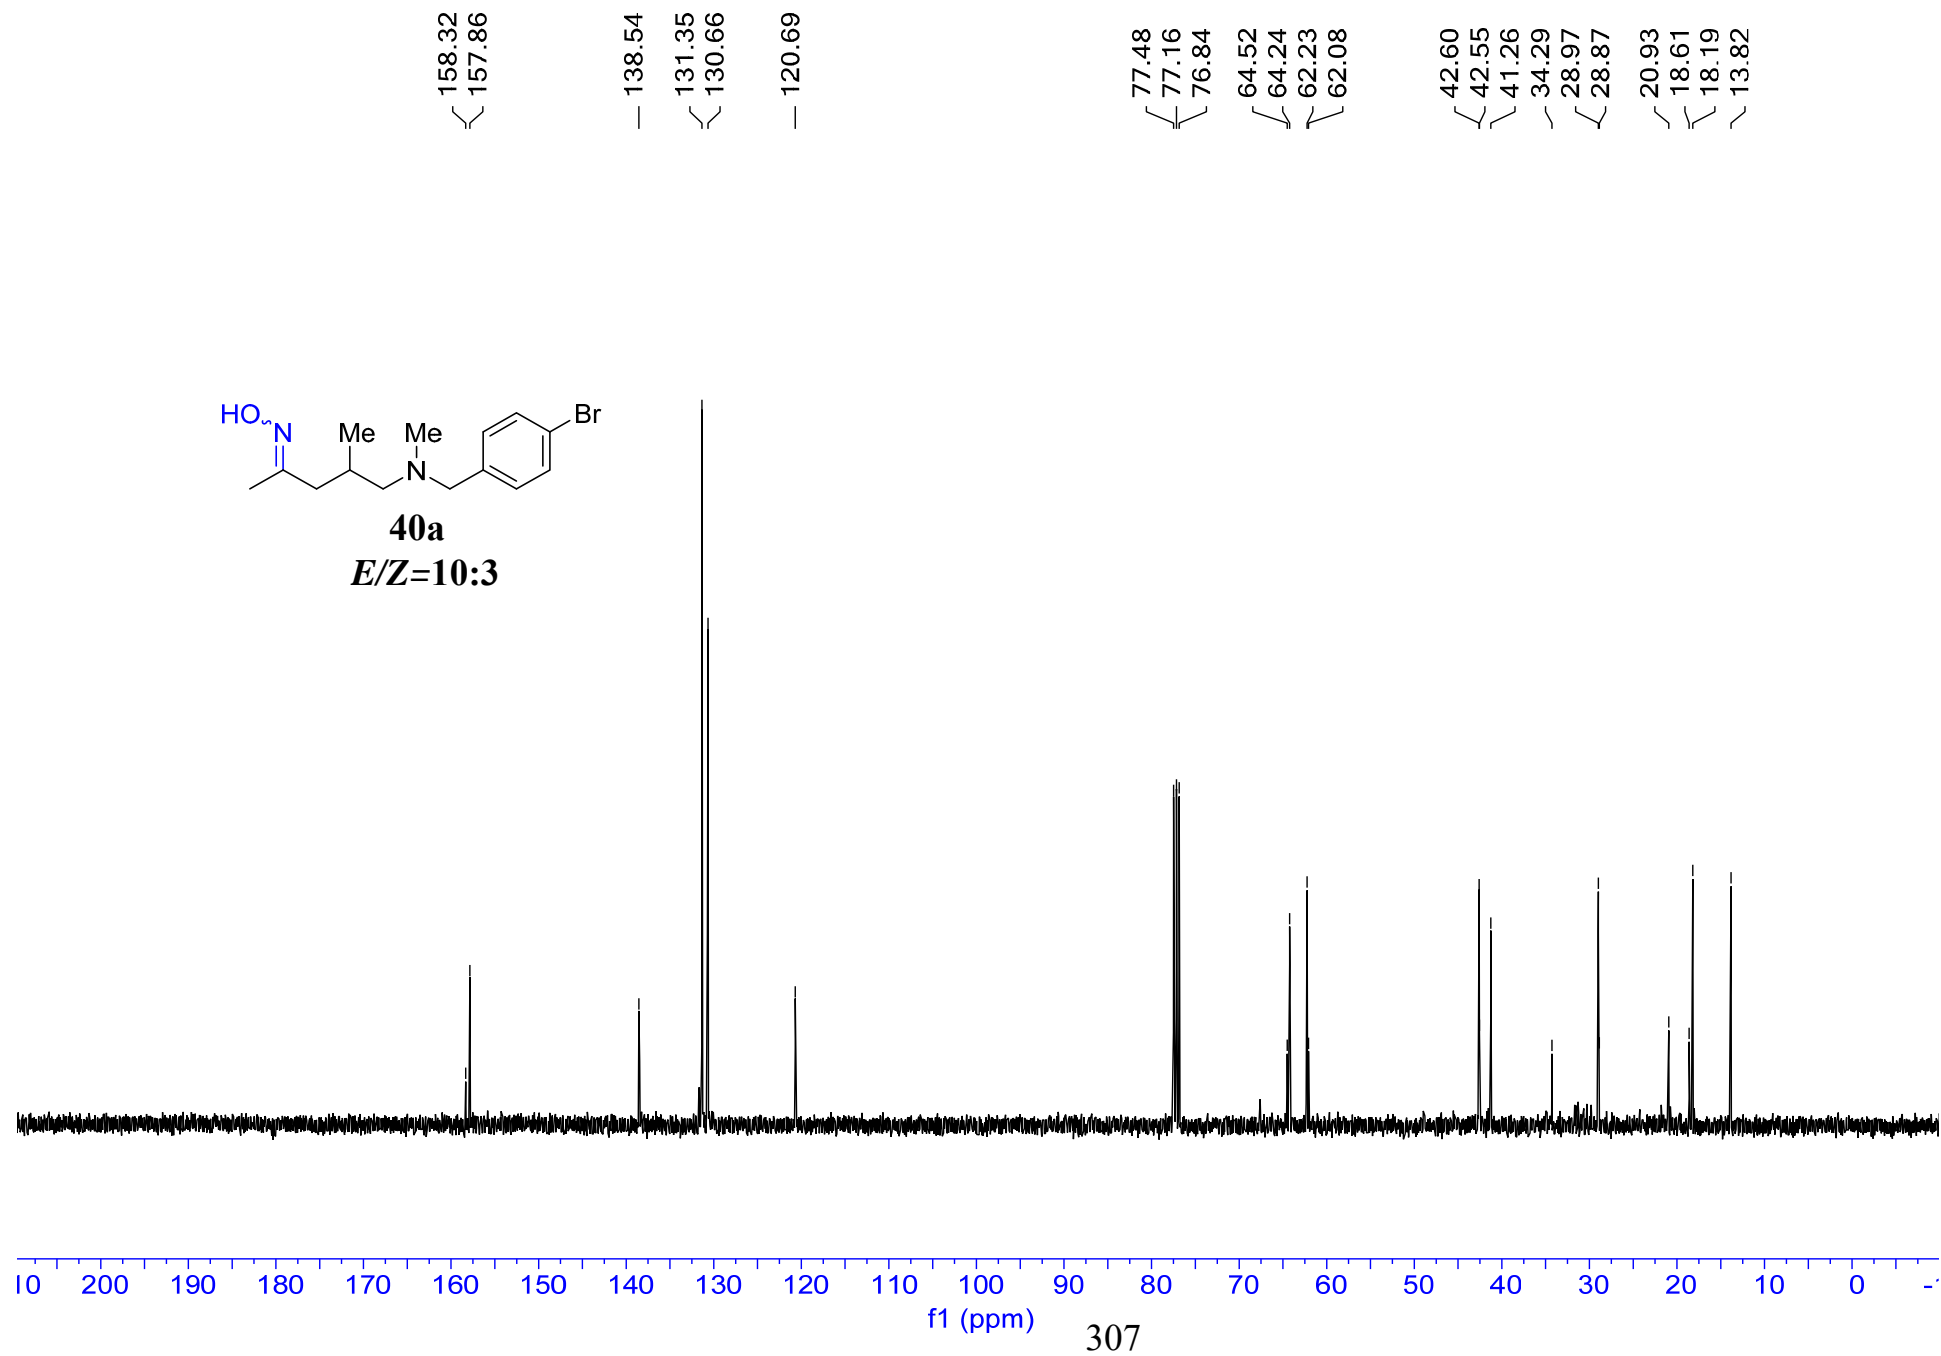

<sup>1</sup>H NMR, 400 MHz, CDCl<sub>3</sub>

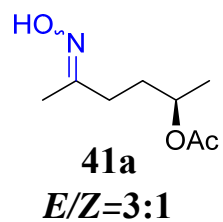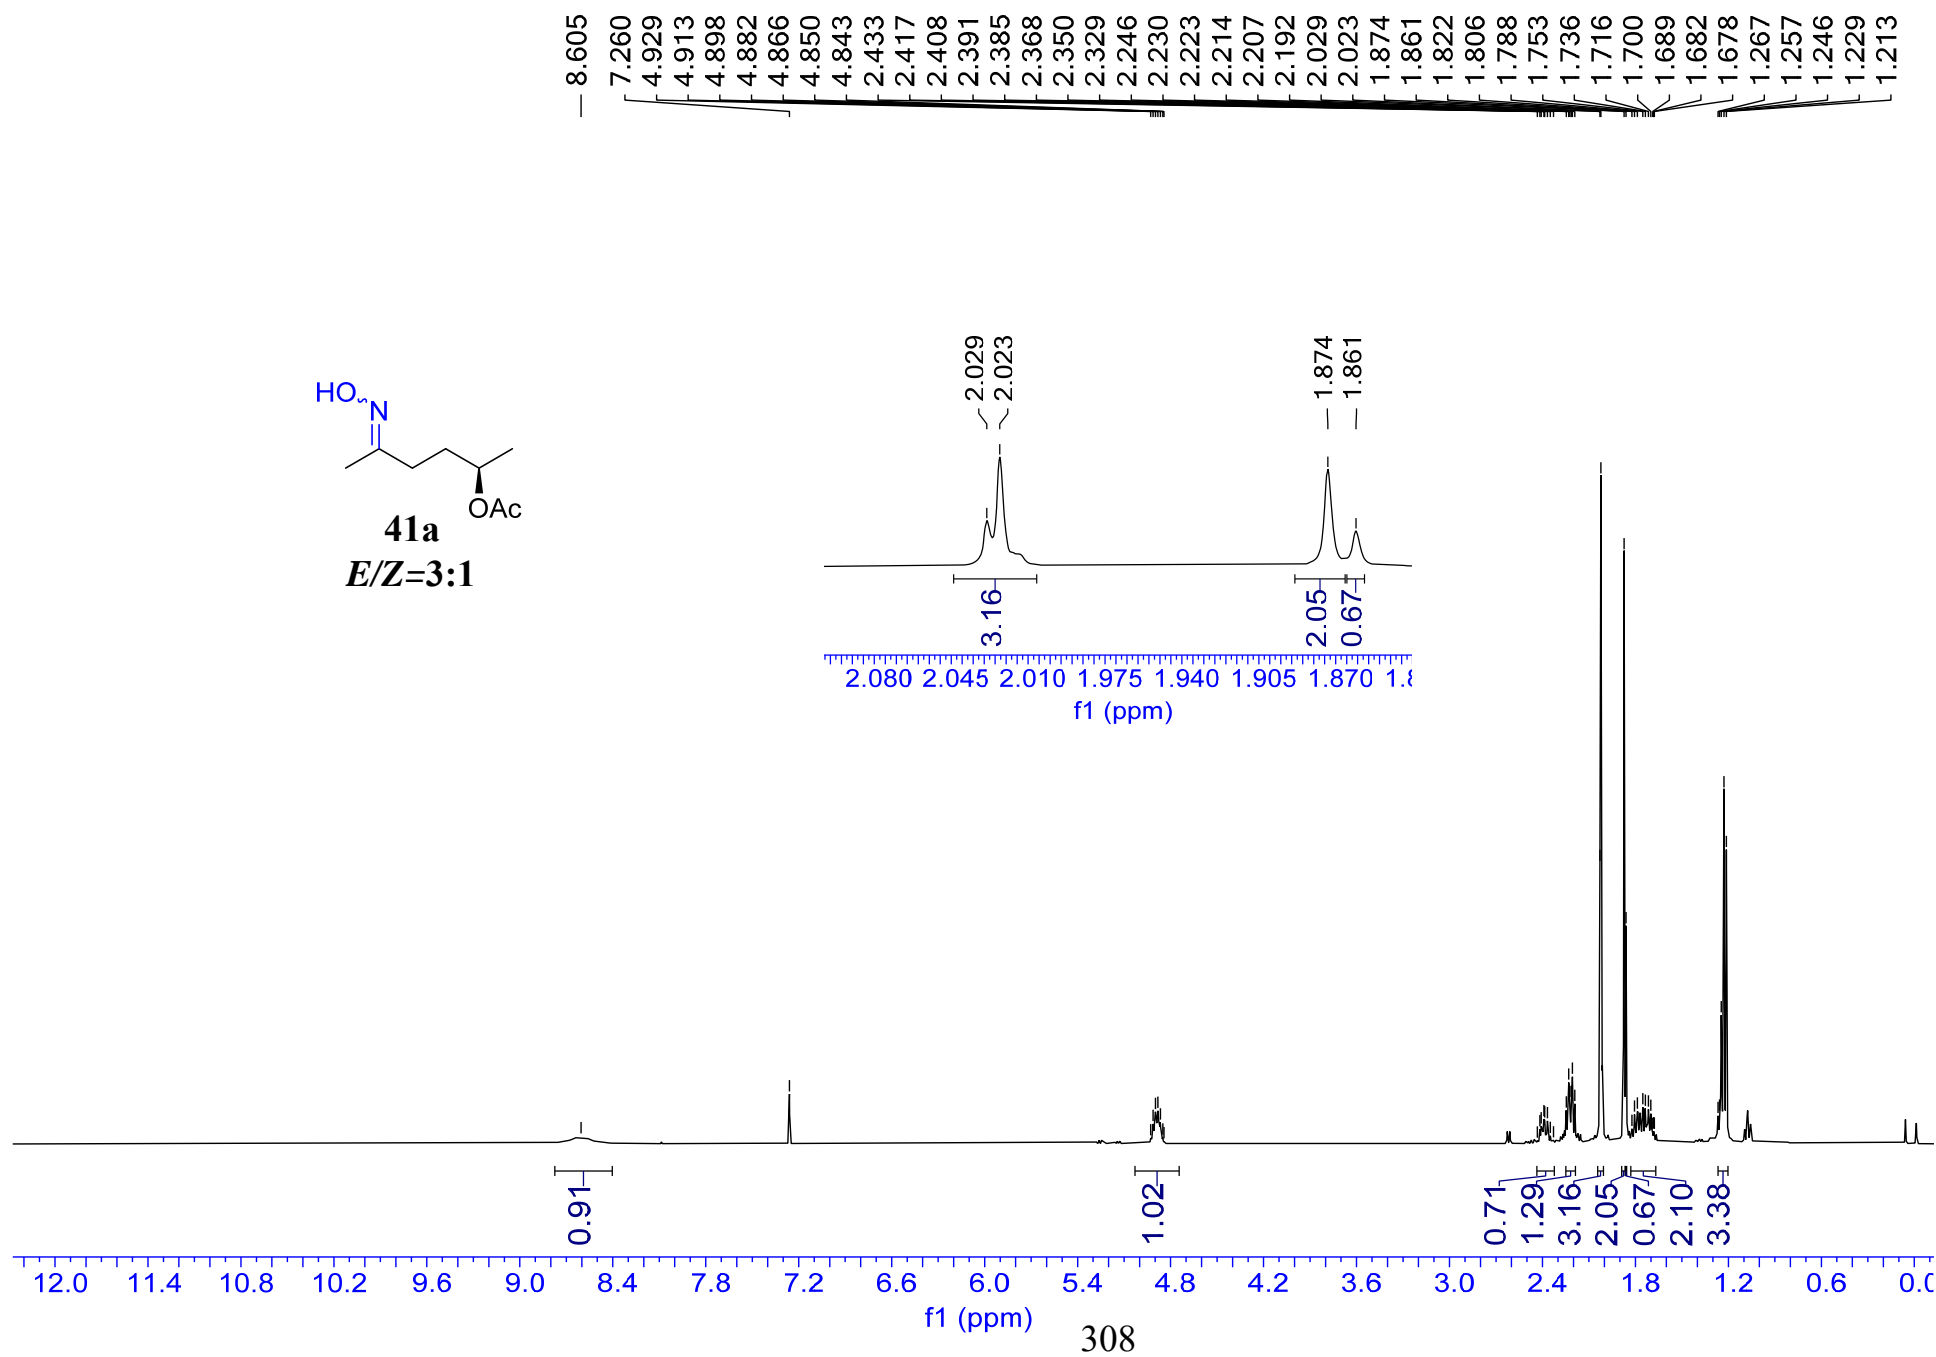



$^{13}\text{C}$  NMR 101 MHz,  $\text{CDCl}_3$

170.97  
170.93

158.11  
157.80

77.48  
77.16  
76.84  
70.80  
70.49

32.25  
32.08  
31.53  
24.85  
21.43  
20.01  
19.96  
19.94  
13.67

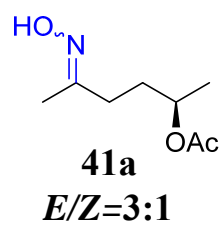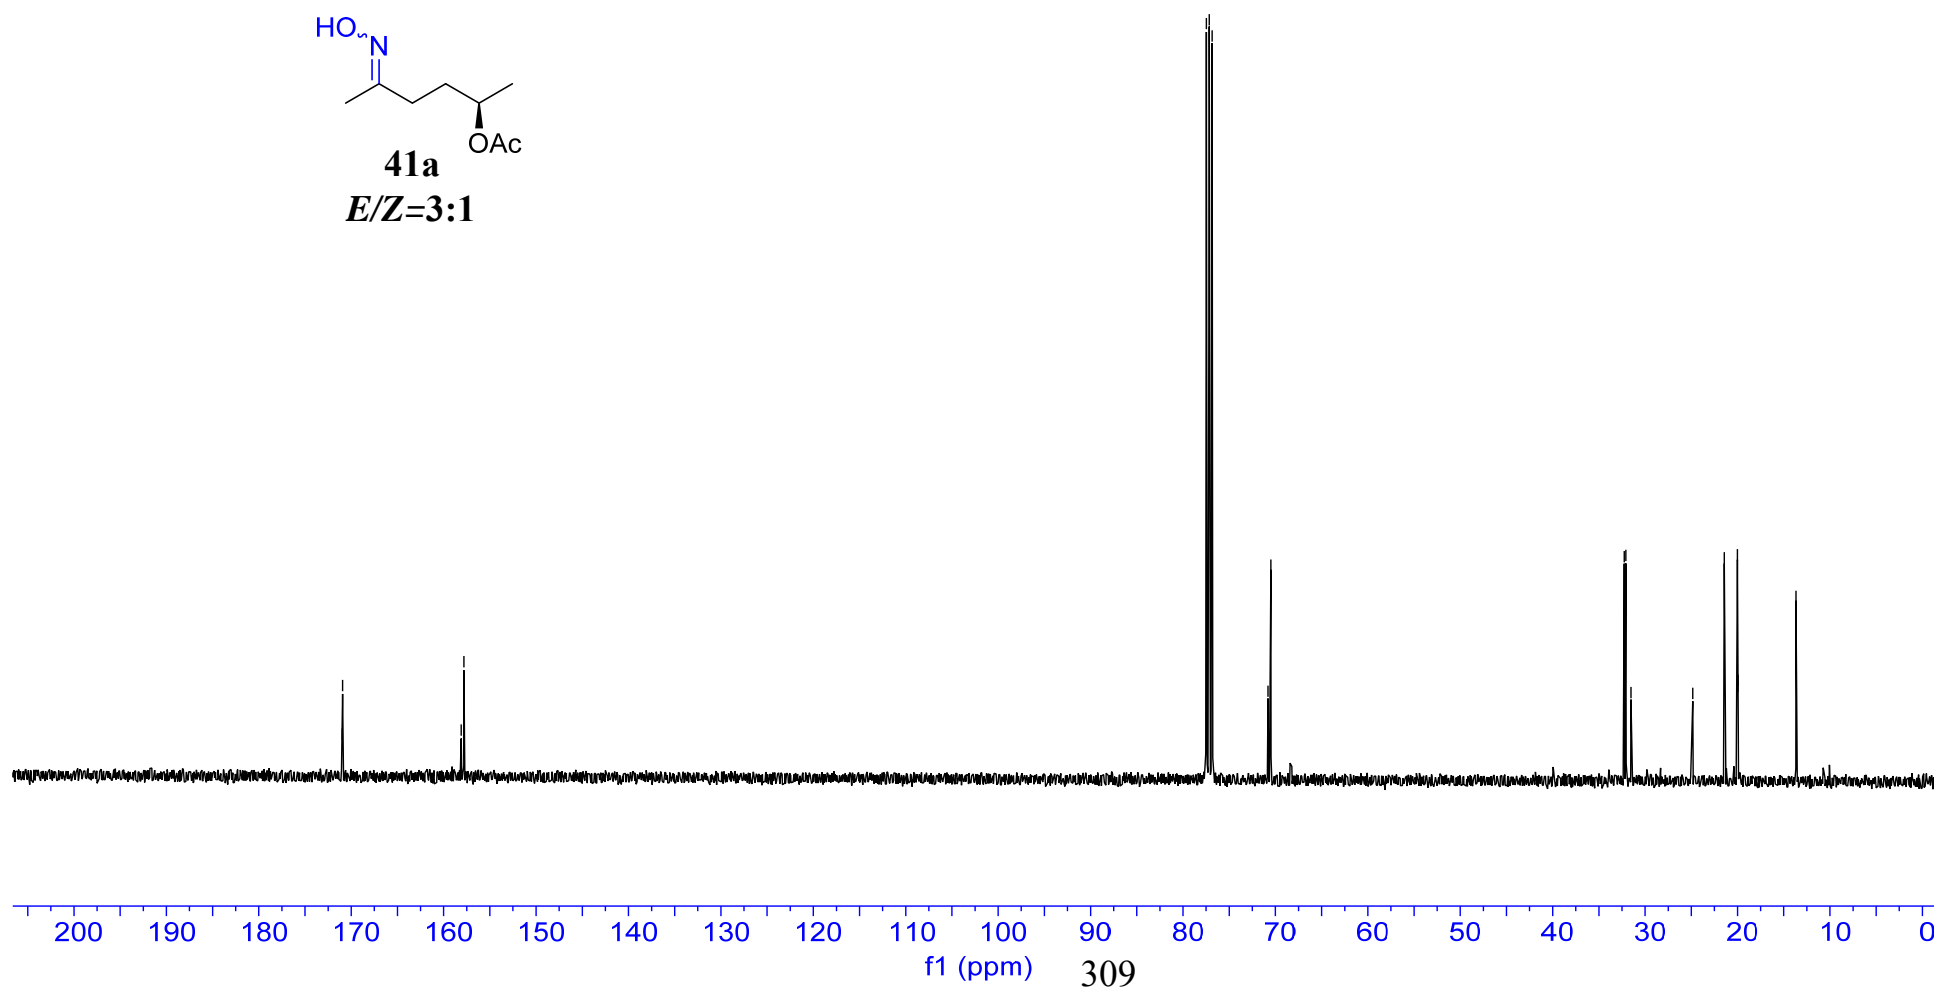

<sup>1</sup>H NMR, 400 MHz, CDCl<sub>3</sub>

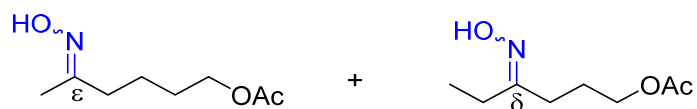

**42a**

$\delta:\epsilon=1:9$

$\epsilon, E/Z=3:1$

$\delta, E/Z=1:1$

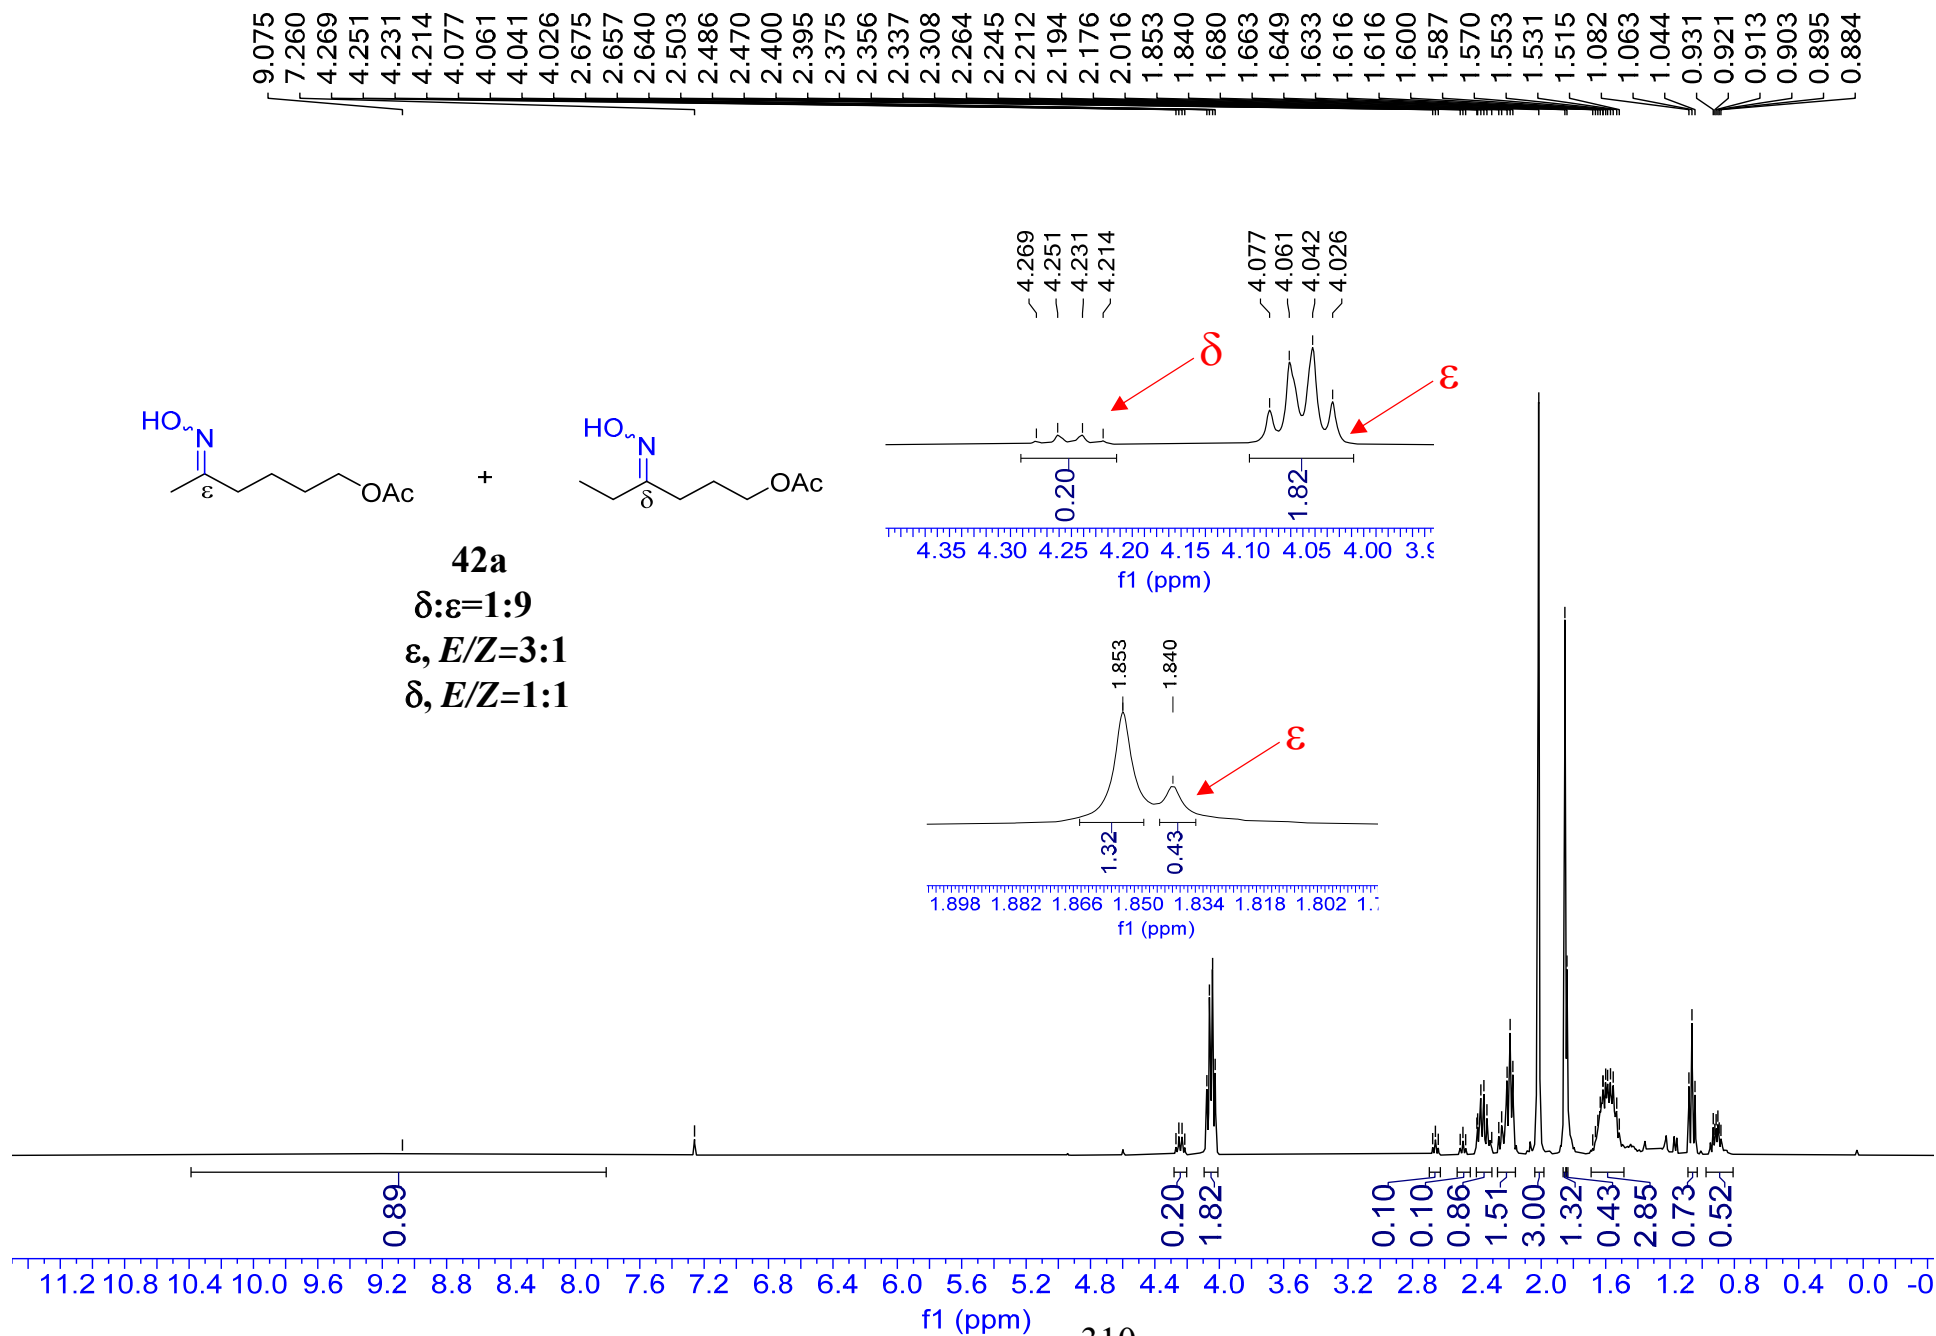

$^{13}\text{C}$  NMR 101 MHz,  $\text{CDCl}_3$

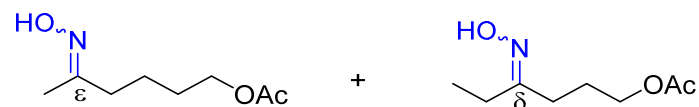

**42a**

$\delta:\epsilon=1:9$

$\epsilon, E/Z=3:1$

$\delta, E/Z=1:1$

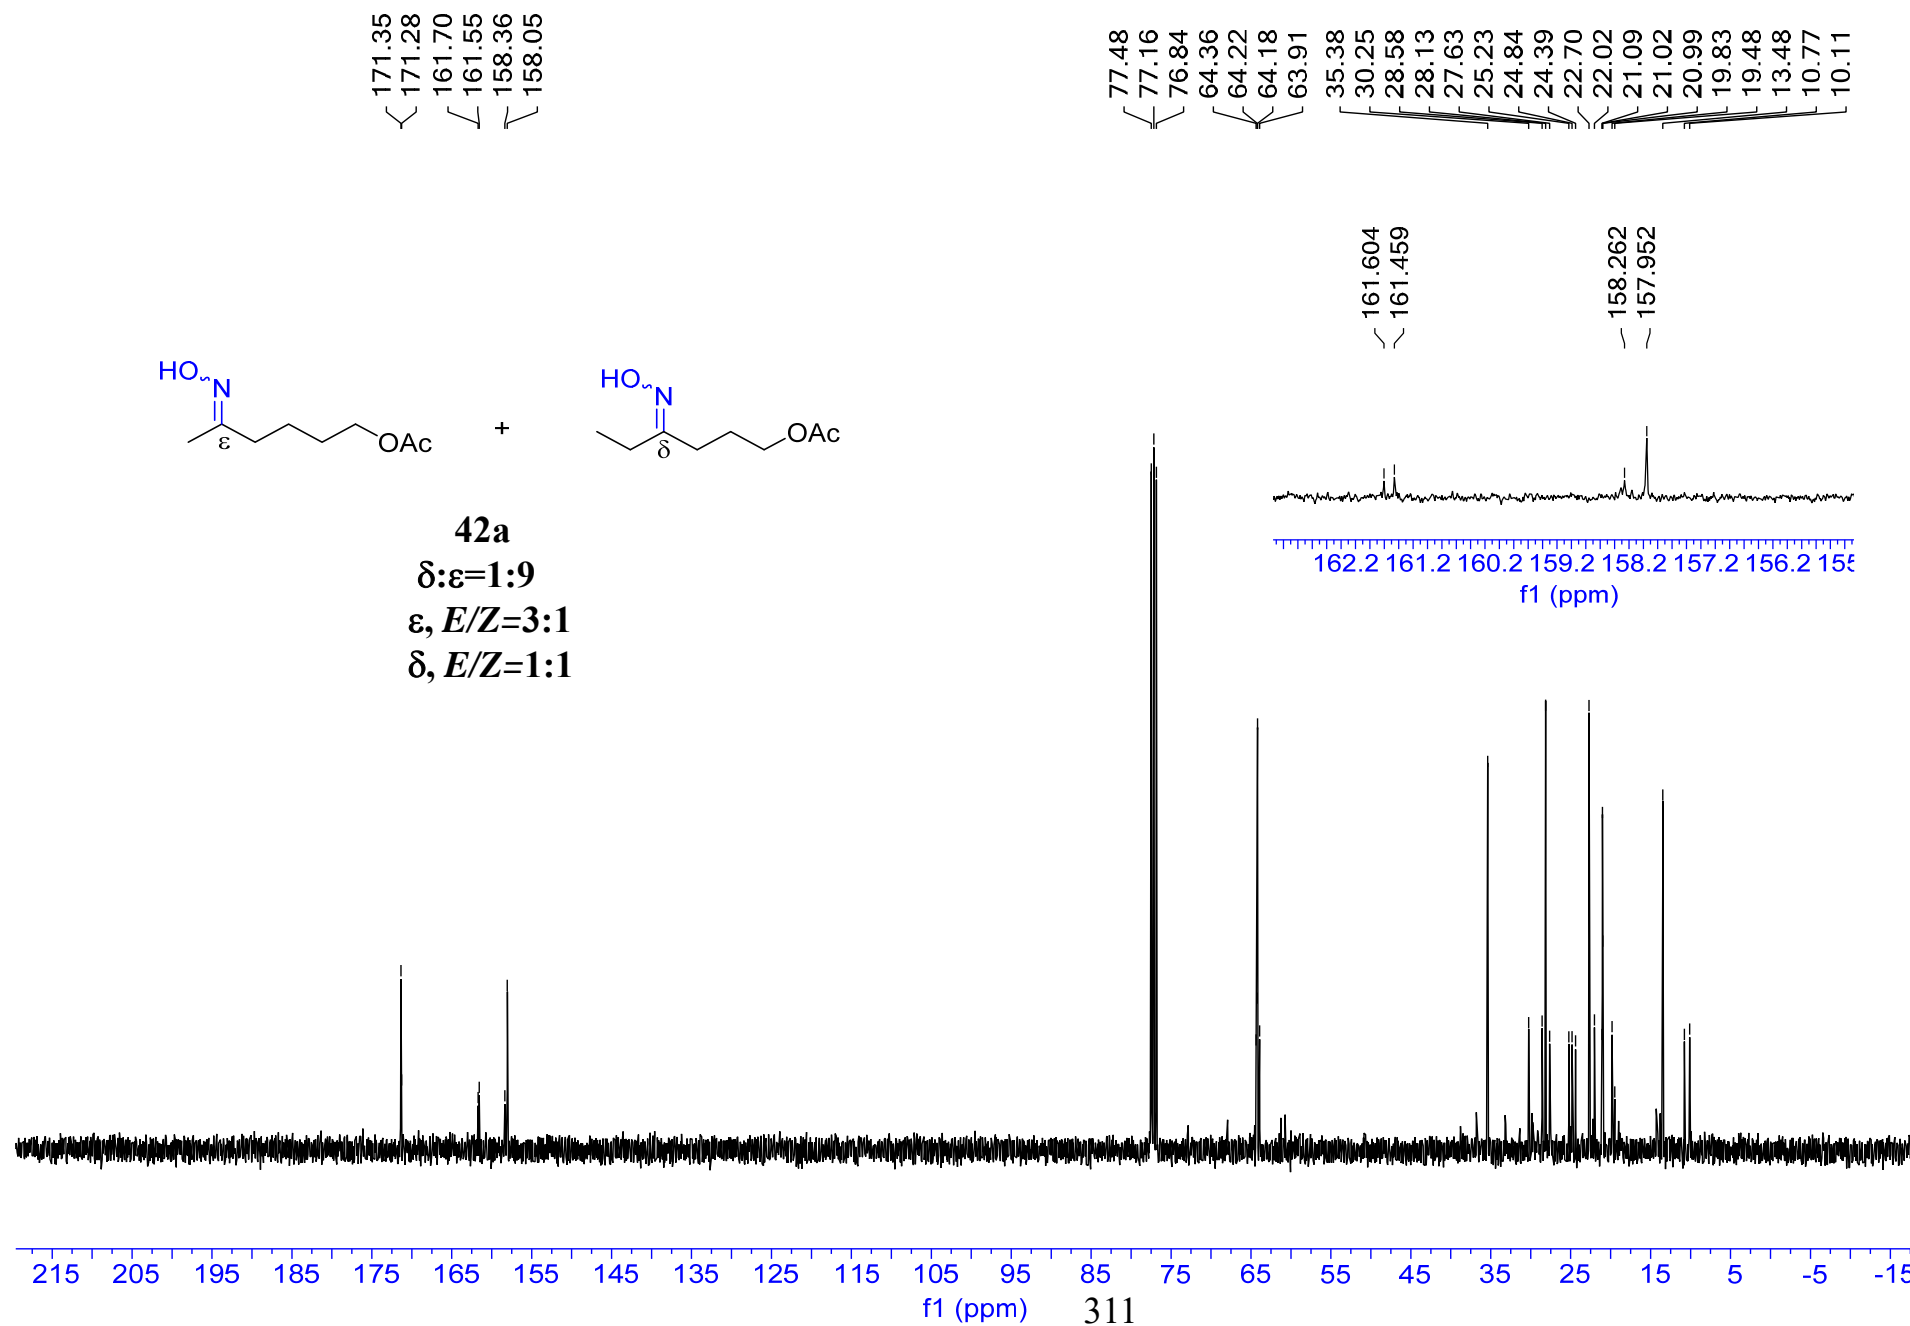

<sup>1</sup>H NMR, 400 MHz, CDCl<sub>3</sub>

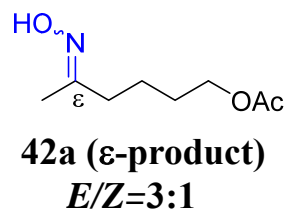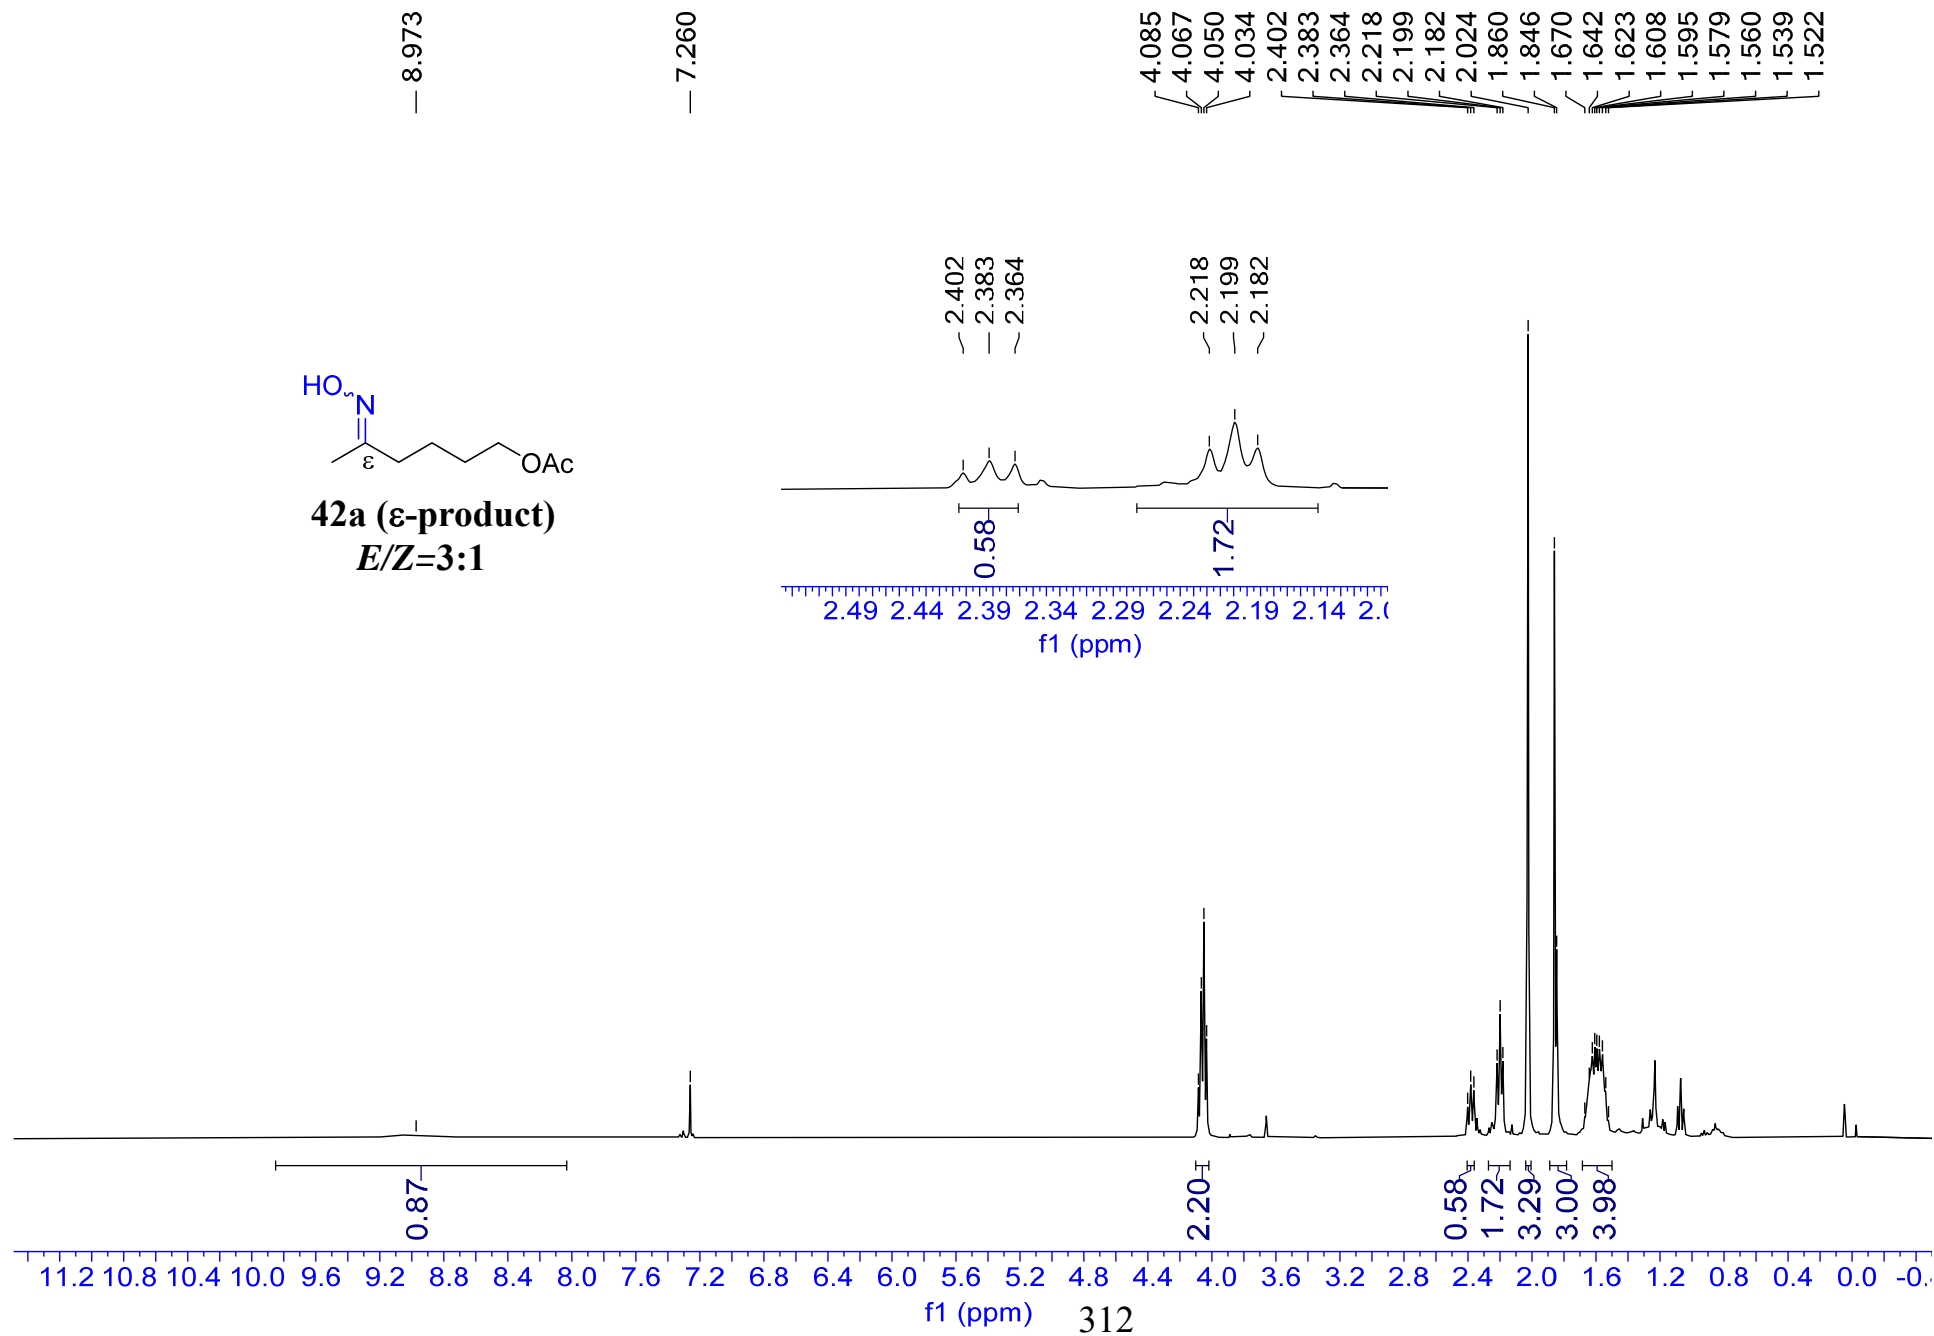

<sup>13</sup>C NMR 101 MHz, CDCl<sub>3</sub>

171.39  
158.44  
158.14

77.48  
77.16  
76.84

64.24  
64.20

35.38  
28.59  
28.14  
22.72  
22.04  
21.05  
19.84  
13.49

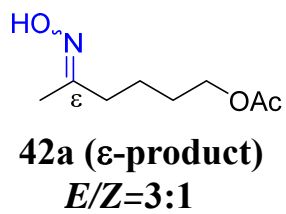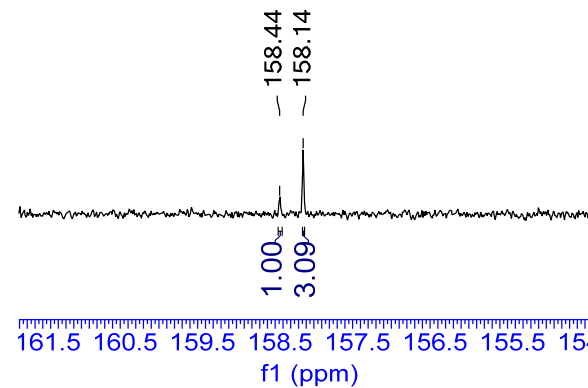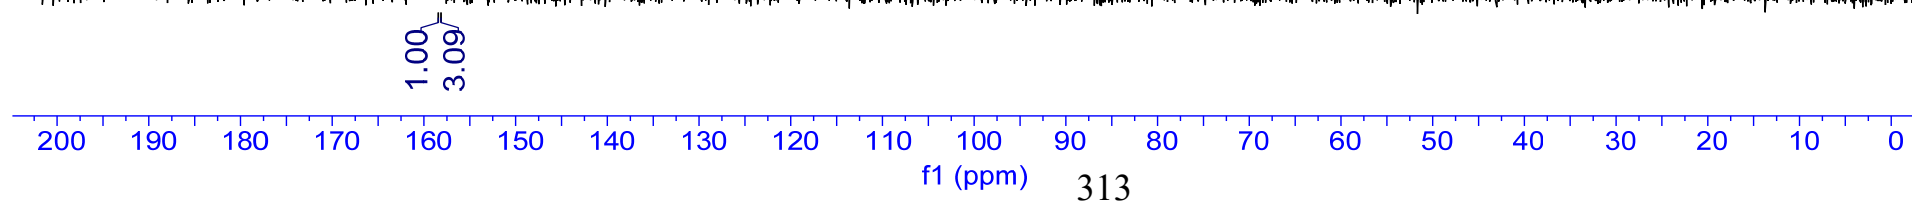

<sup>1</sup>H NMR, 400 MHz, CDCl<sub>3</sub>

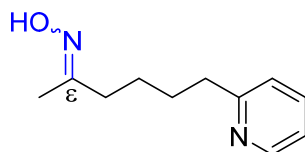

**43a (ε-product)**  
*E/Z*=3:1

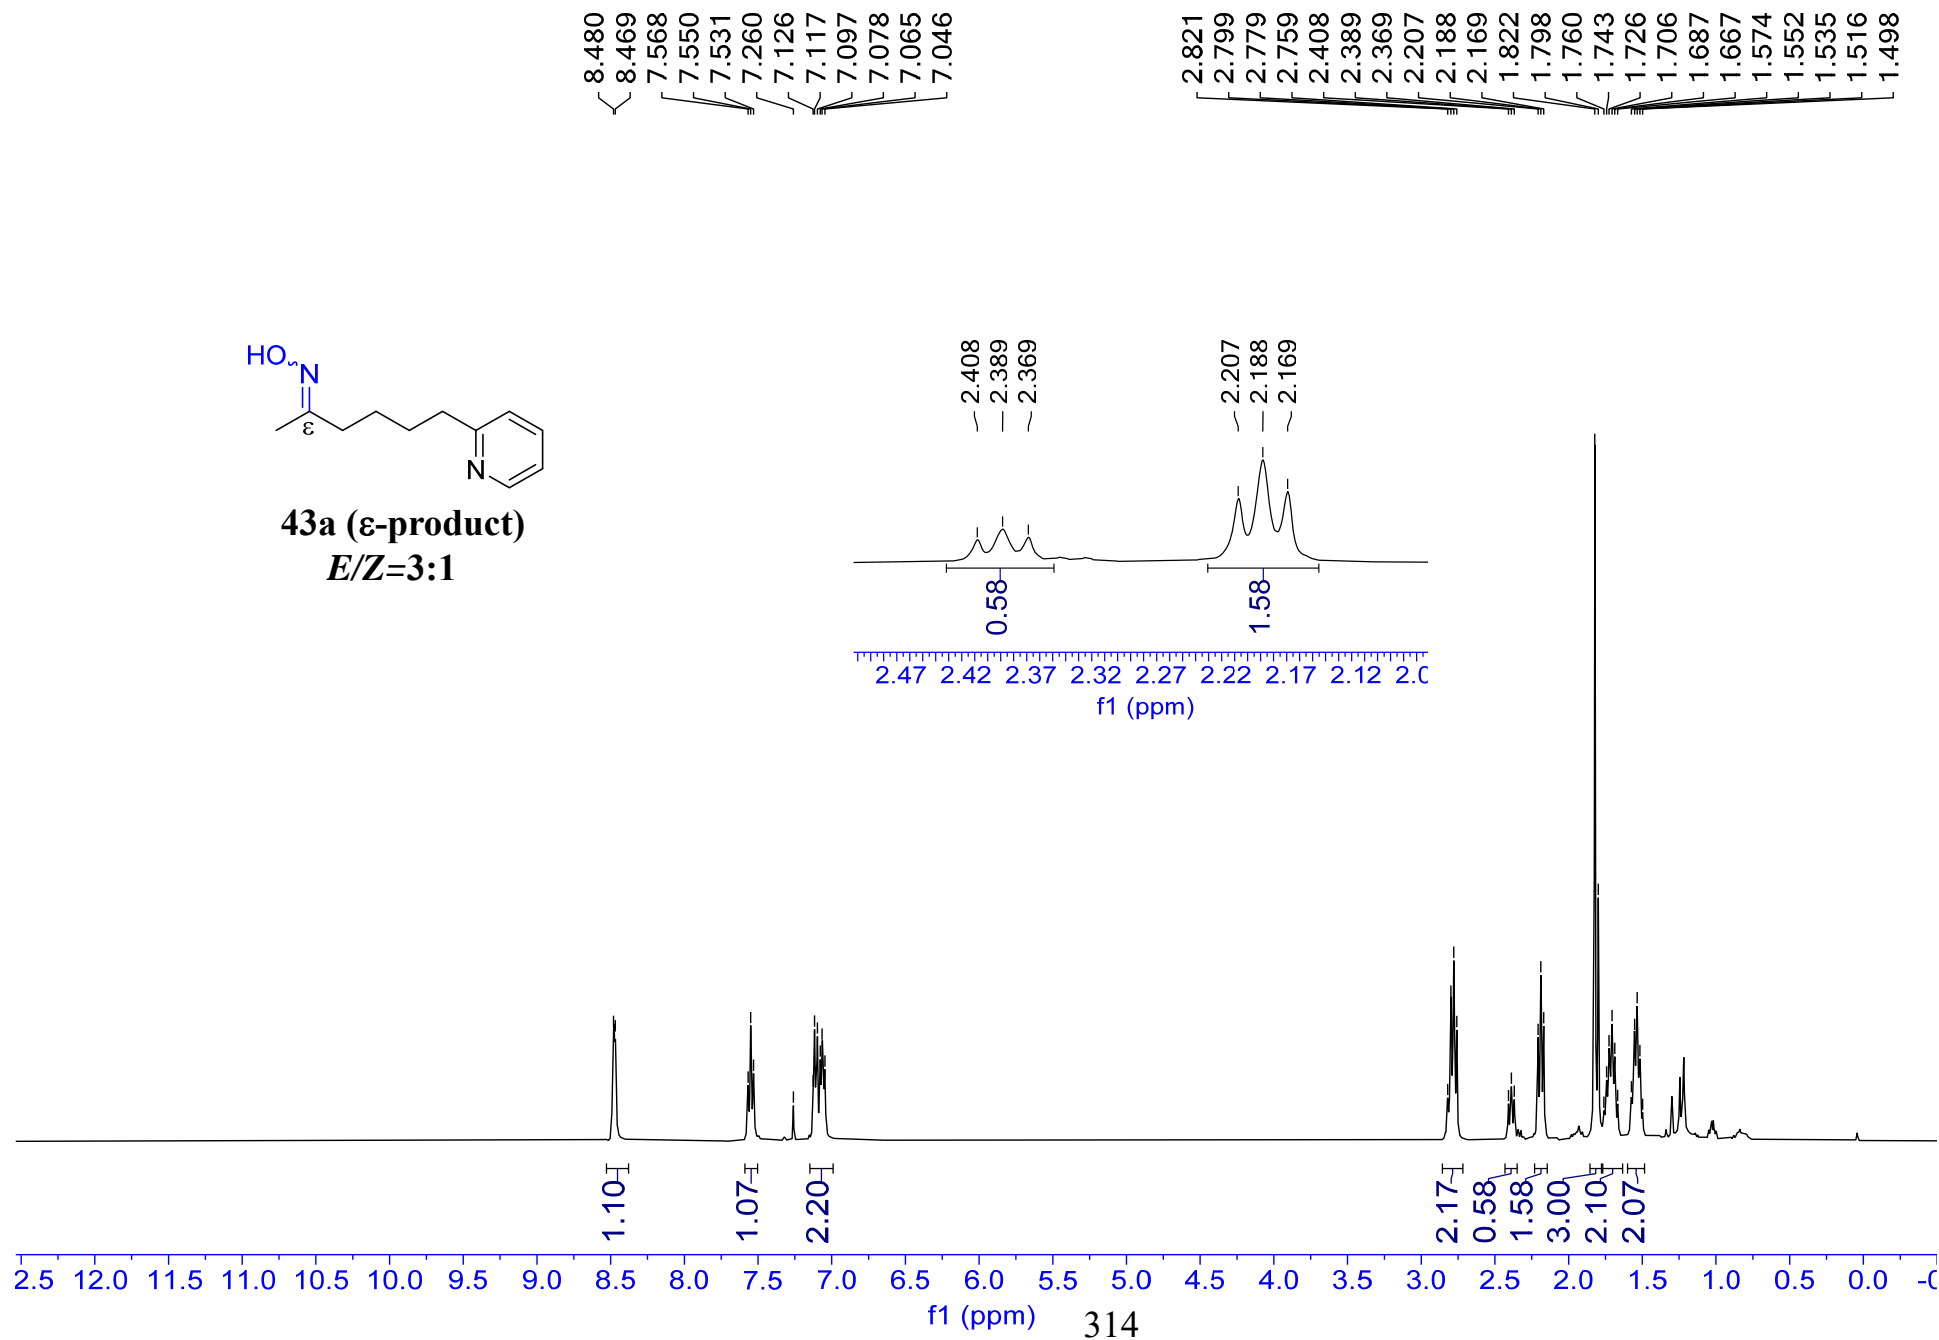

<sup>13</sup>C NMR 101 MHz, CDCl<sub>3</sub>

161.96  
161.92  
158.28  
157.90  
— 148.94

— 136.70

122.96  
121.13

77.48  
77.16  
76.84

37.80  
37.74  
35.59  
29.89  
29.40  
28.39  
26.01  
25.24  
19.88  
13.38

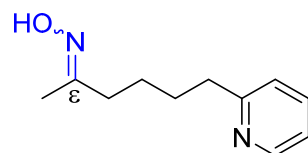

**43a (ε-product)**  
*E/Z=3:1*

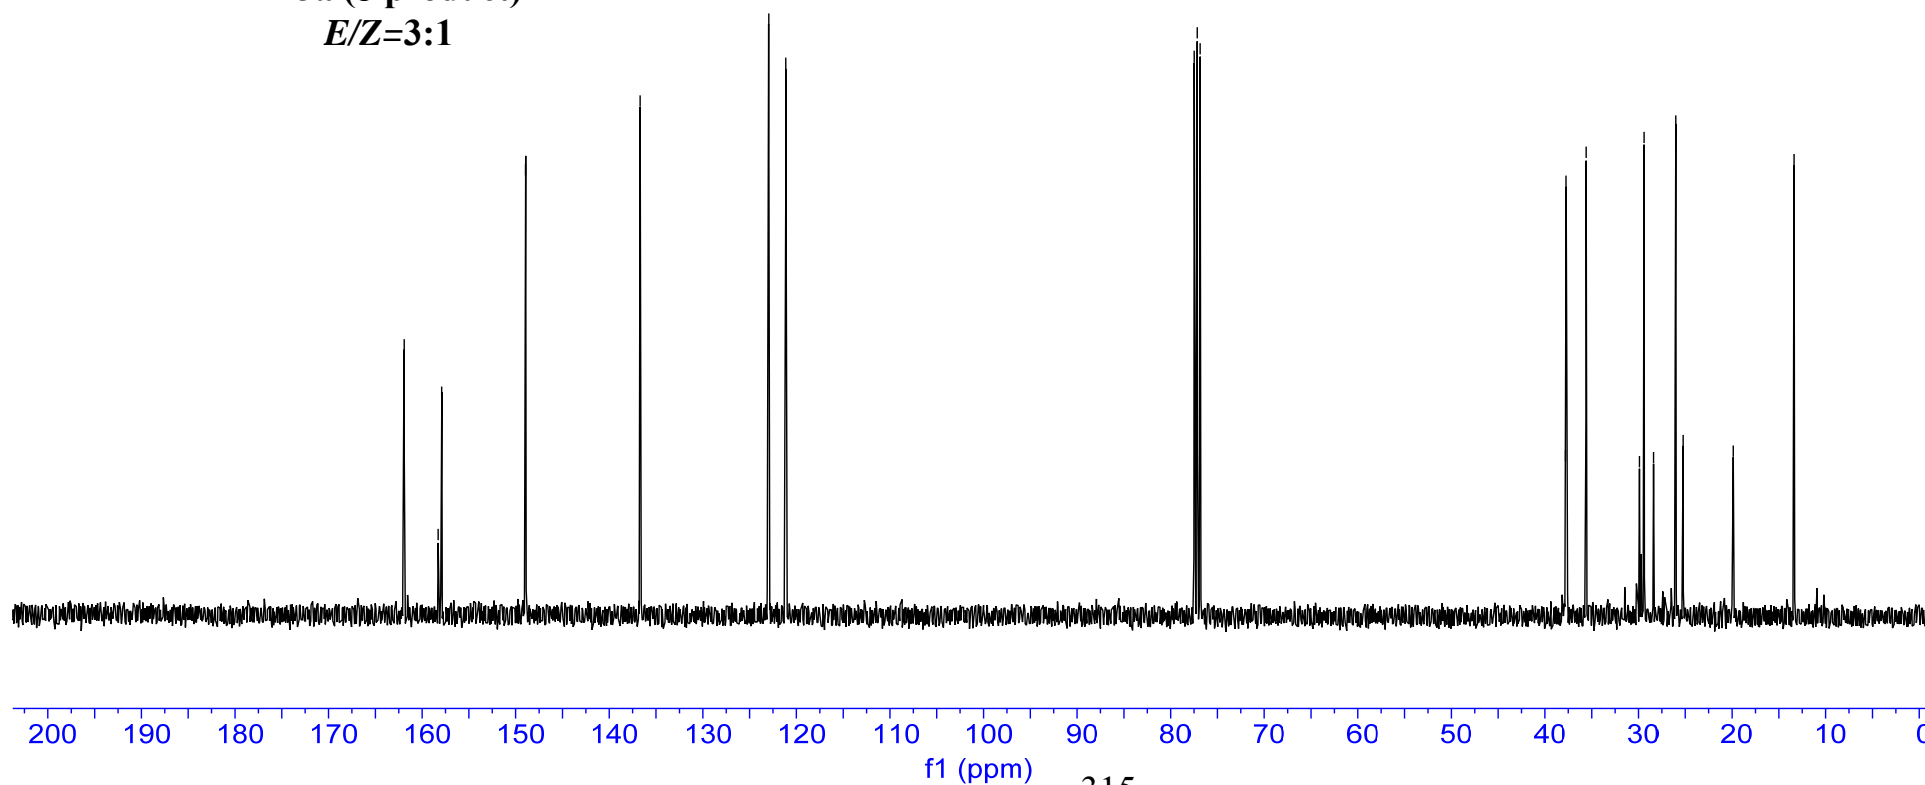

<sup>1</sup>H NMR, 400 MHz, CDCl<sub>3</sub>

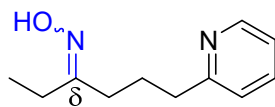

**43a (δ-product)**  
*E/Z*=1:1

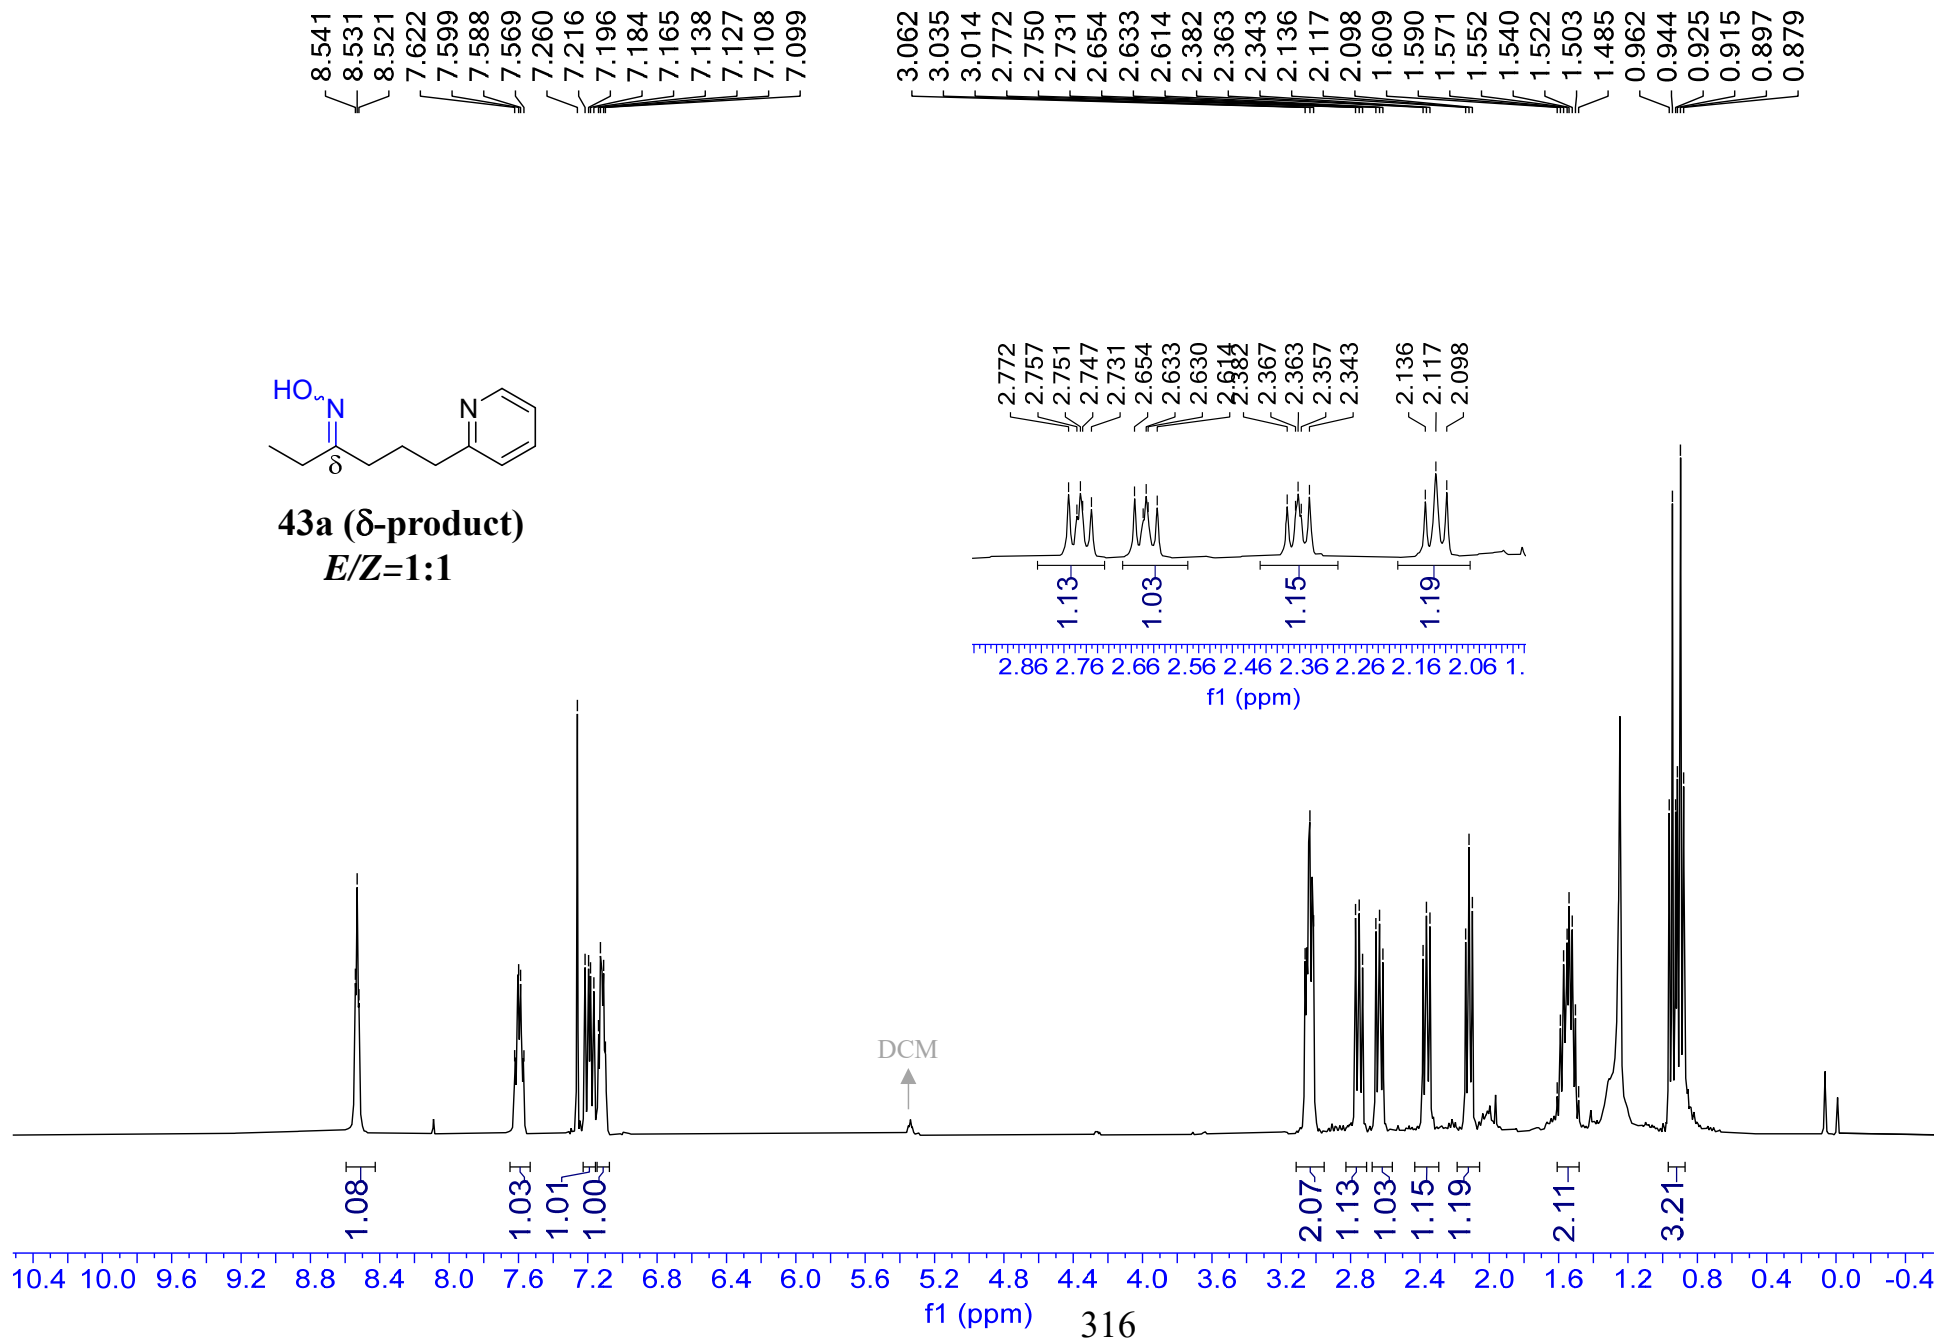



<sup>13</sup>C NMR 101 MHz, CDCl<sub>3</sub>

161.19  
161.09  
160.91

— 149.30

136.74  
136.68

123.14  
123.03  
121.47  
121.40

77.48  
77.16  
76.84

36.58  
34.74  
34.11  
34.01  
30.03  
27.96  
19.70  
19.24  
14.45  
13.95

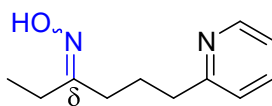

**43a (δ-product)**  
*E/Z=1:1*

161.19  
161.09  
160.91

162.6 162.1 161.6 161.1 160.6 160.1 159.6 15  
f1 (ppm)

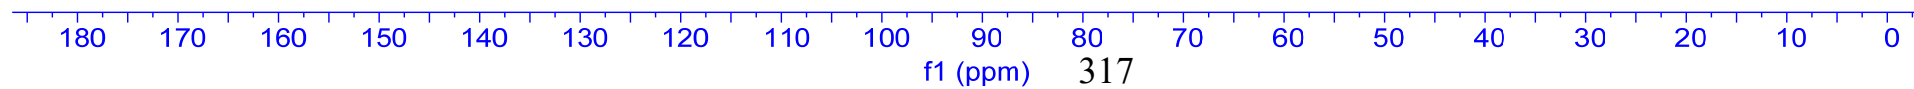

<sup>1</sup>H NMR, 400 MHz, CDCl<sub>3</sub>

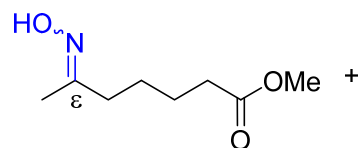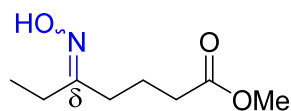

+

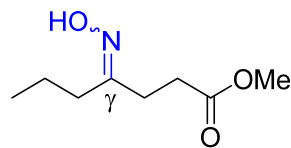

**44a**

$\gamma:\delta:\epsilon = 1:6.7:16.7$

$\epsilon, E/Z=3:1$

$\delta, E/Z=1:1$

$\gamma, E/Z=1:1$

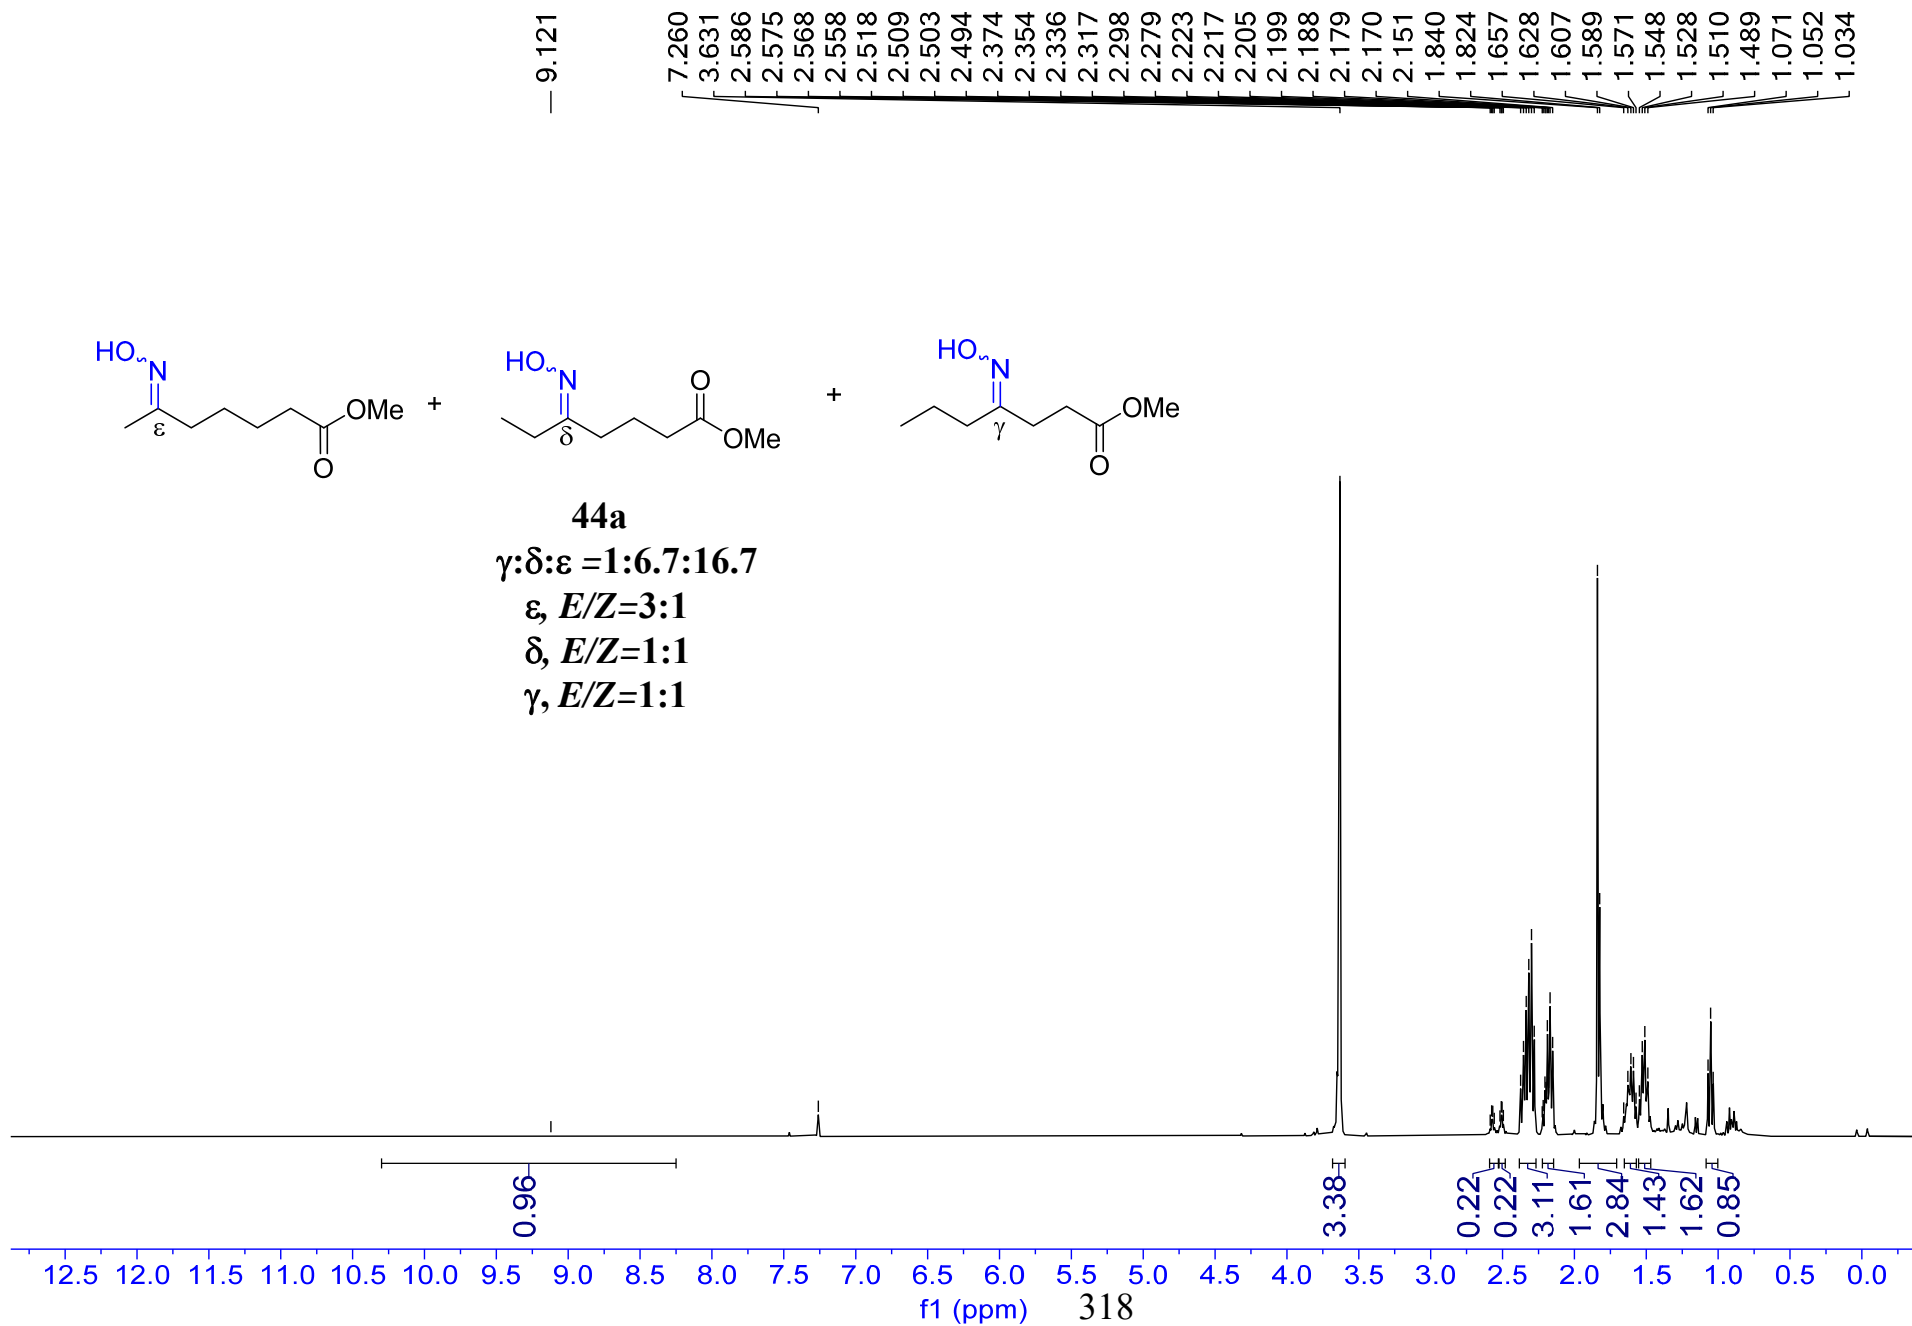

**$^{13}\text{C}$  NMR 101 MHz,  $\text{CDCl}_3$**

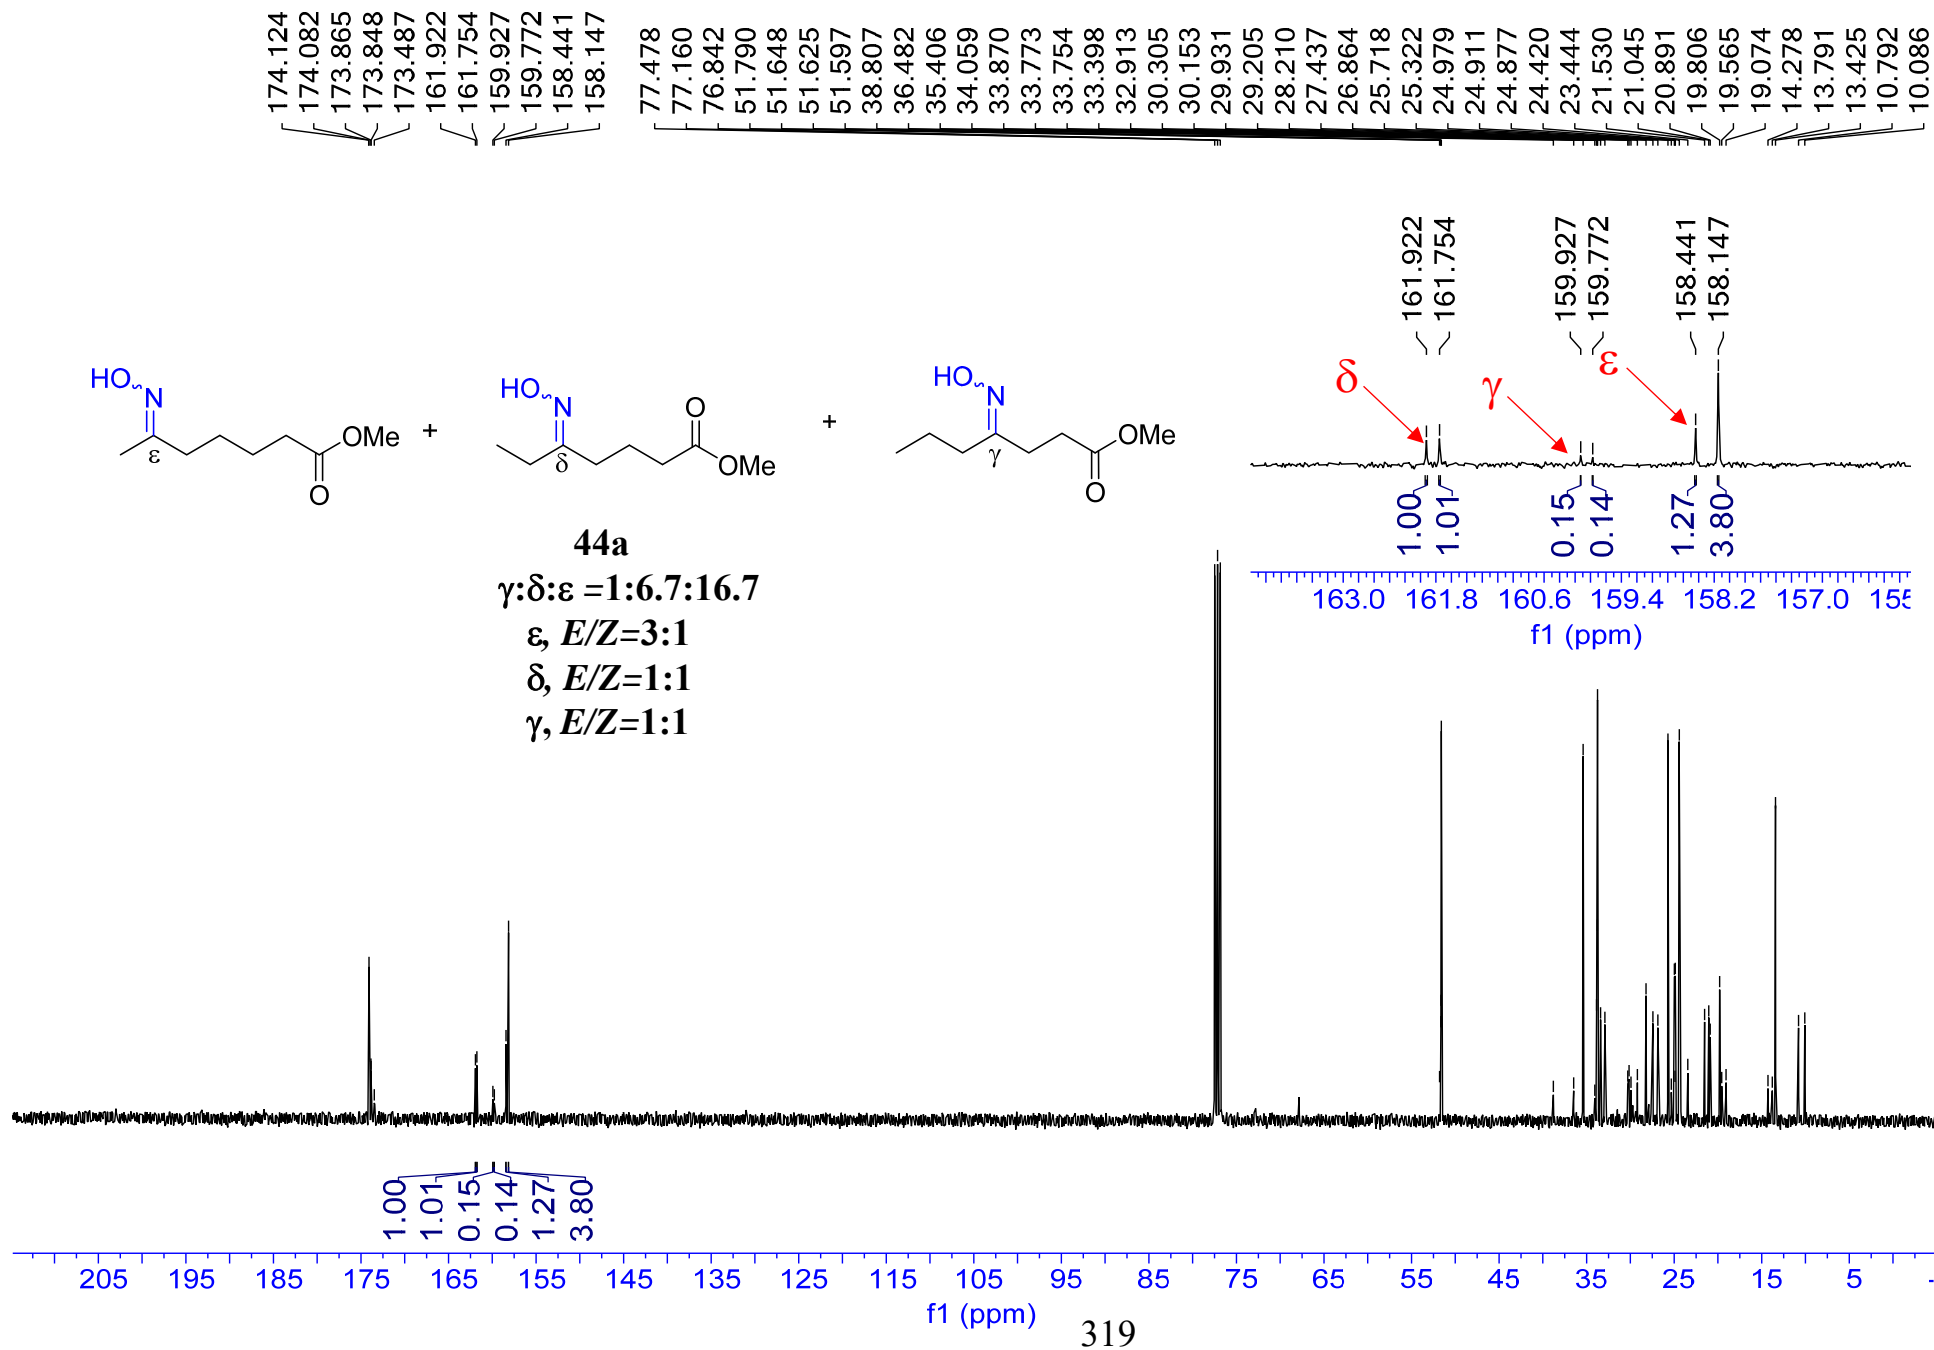

<sup>1</sup>H NMR, 400 MHz, CDCl<sub>3</sub>

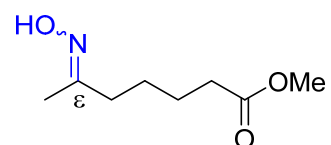

**44a (ε-product)**  
*E/Z*=3:1

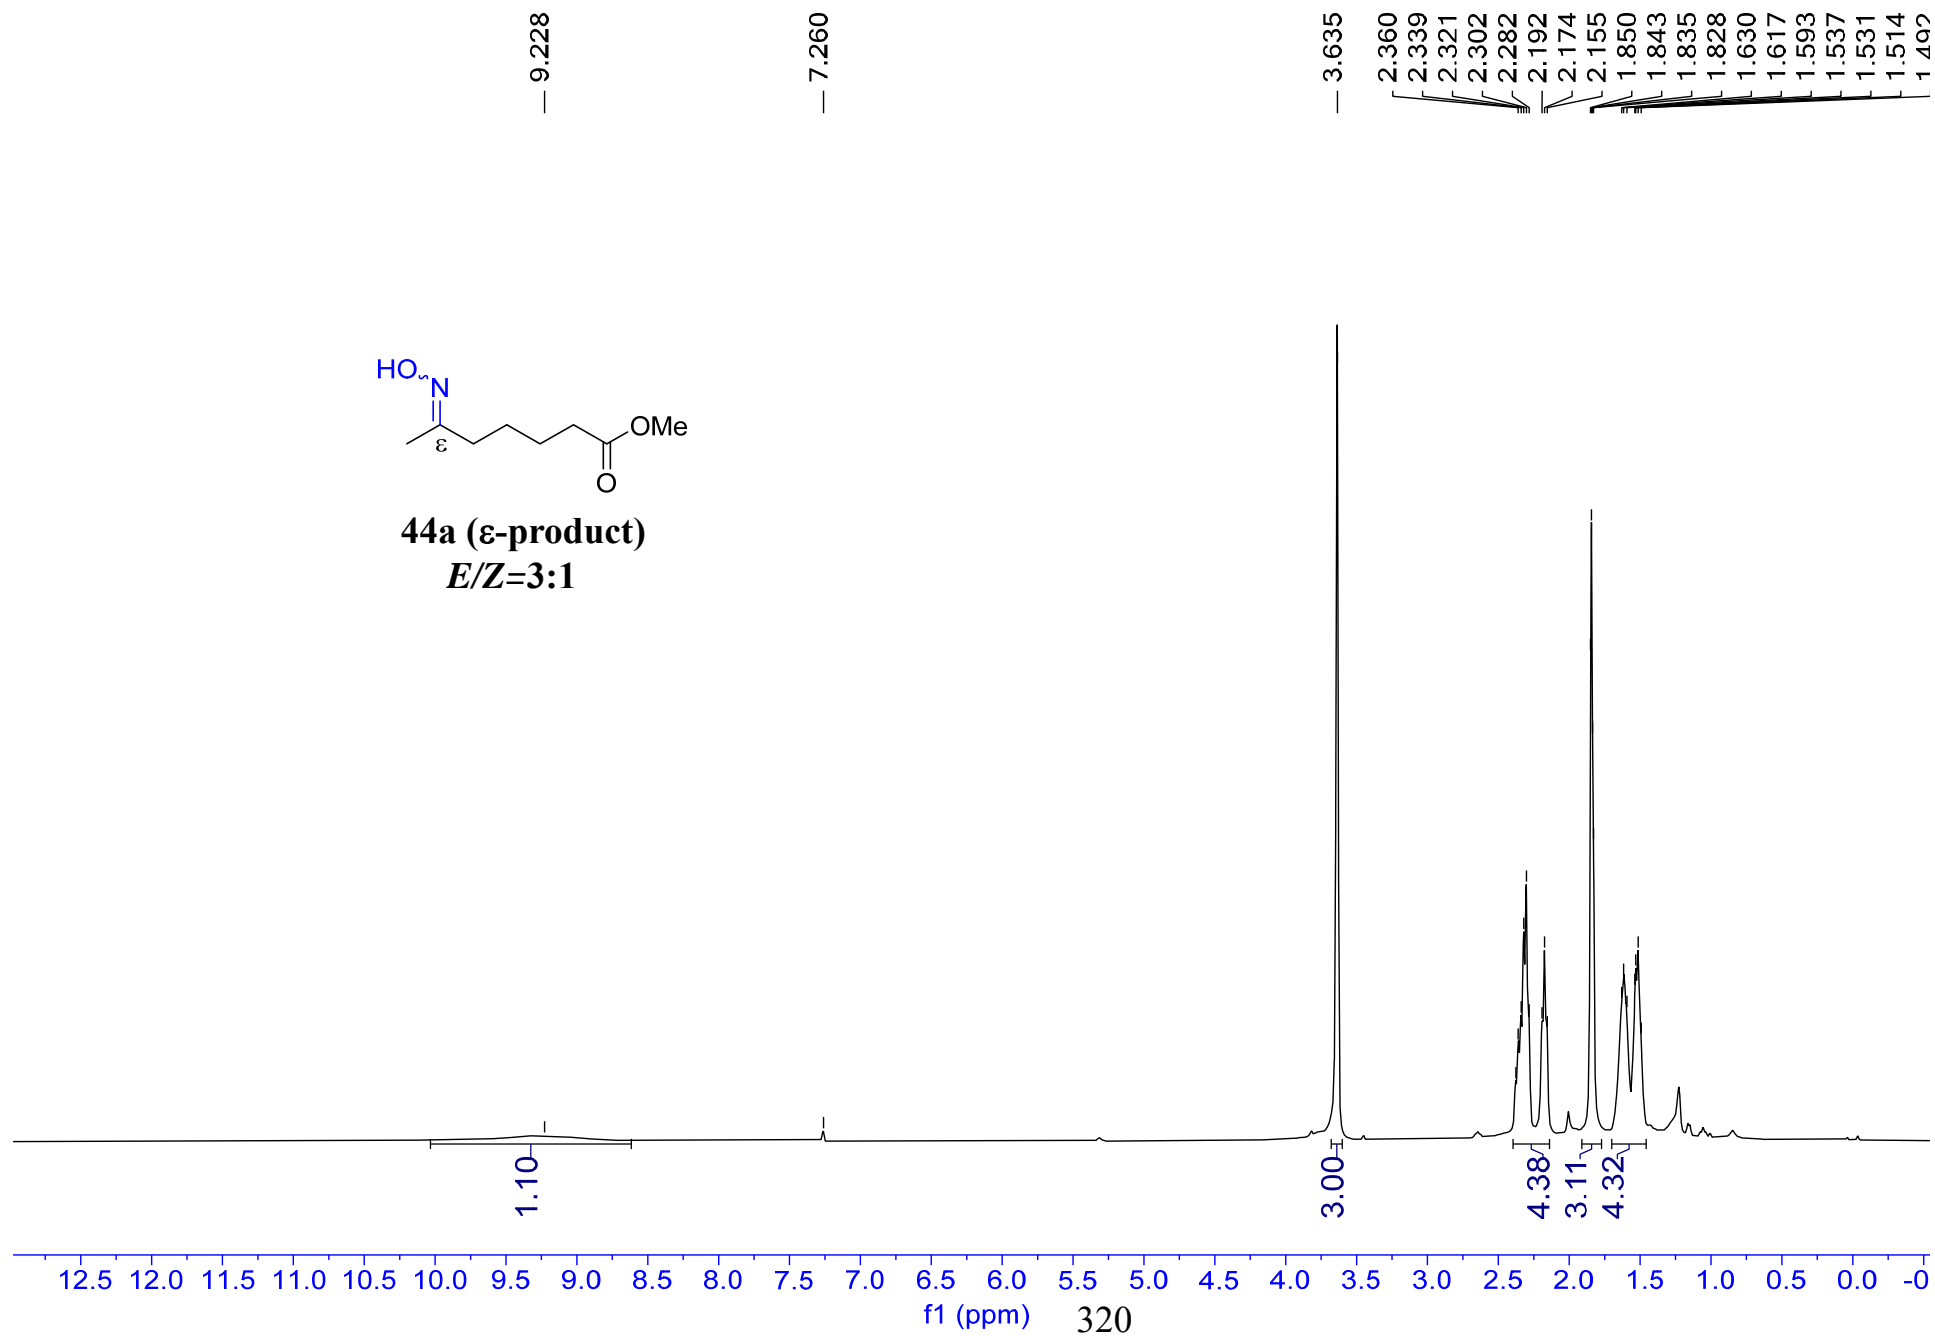

$^{13}\text{C}$  NMR 101 MHz,  $\text{CDCl}_3$

— 174.08

158.45  
158.15

77.48  
77.16  
76.84

— 51.61

35.41  
33.77  
33.75  
28.22  
25.72  
24.98  
24.88  
24.42  
19.82  
13.44

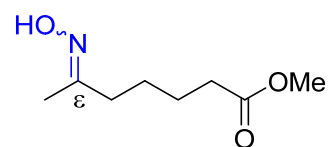

**44a ( $\epsilon$ -product)**  
*E/Z=3:1*

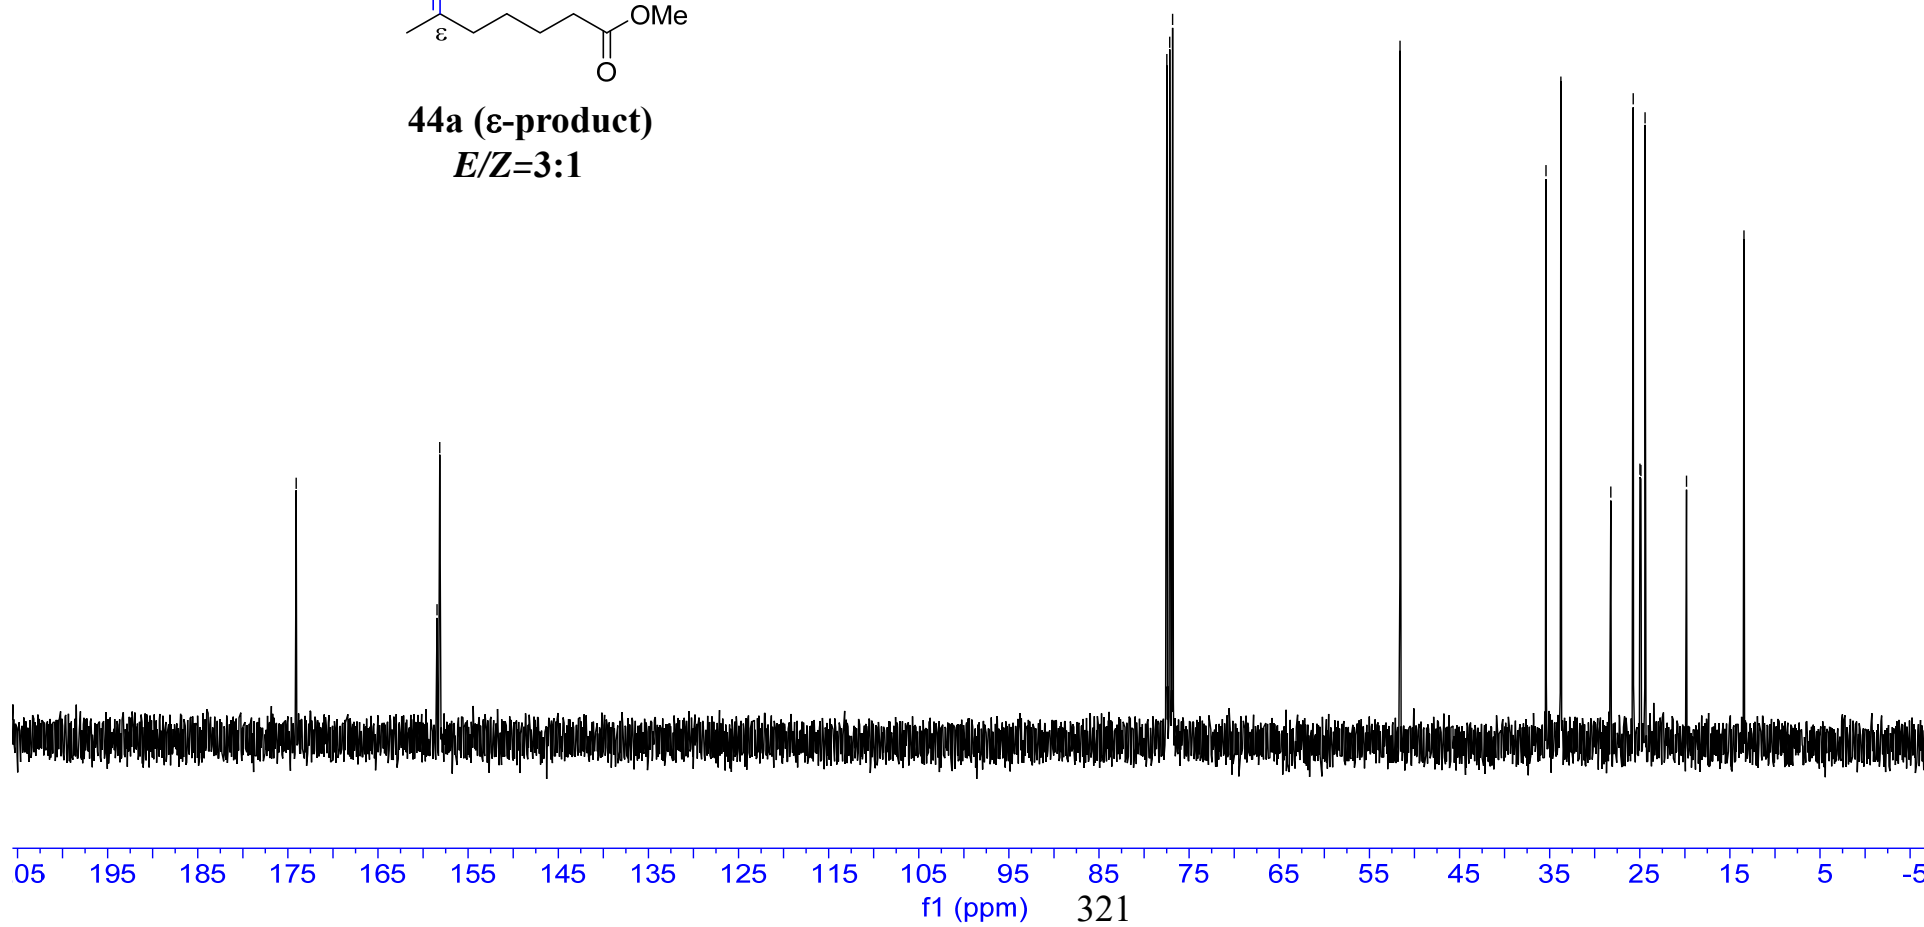

$^1\text{H}$  NMR, 400 MHz,  $\text{CDCl}_3$

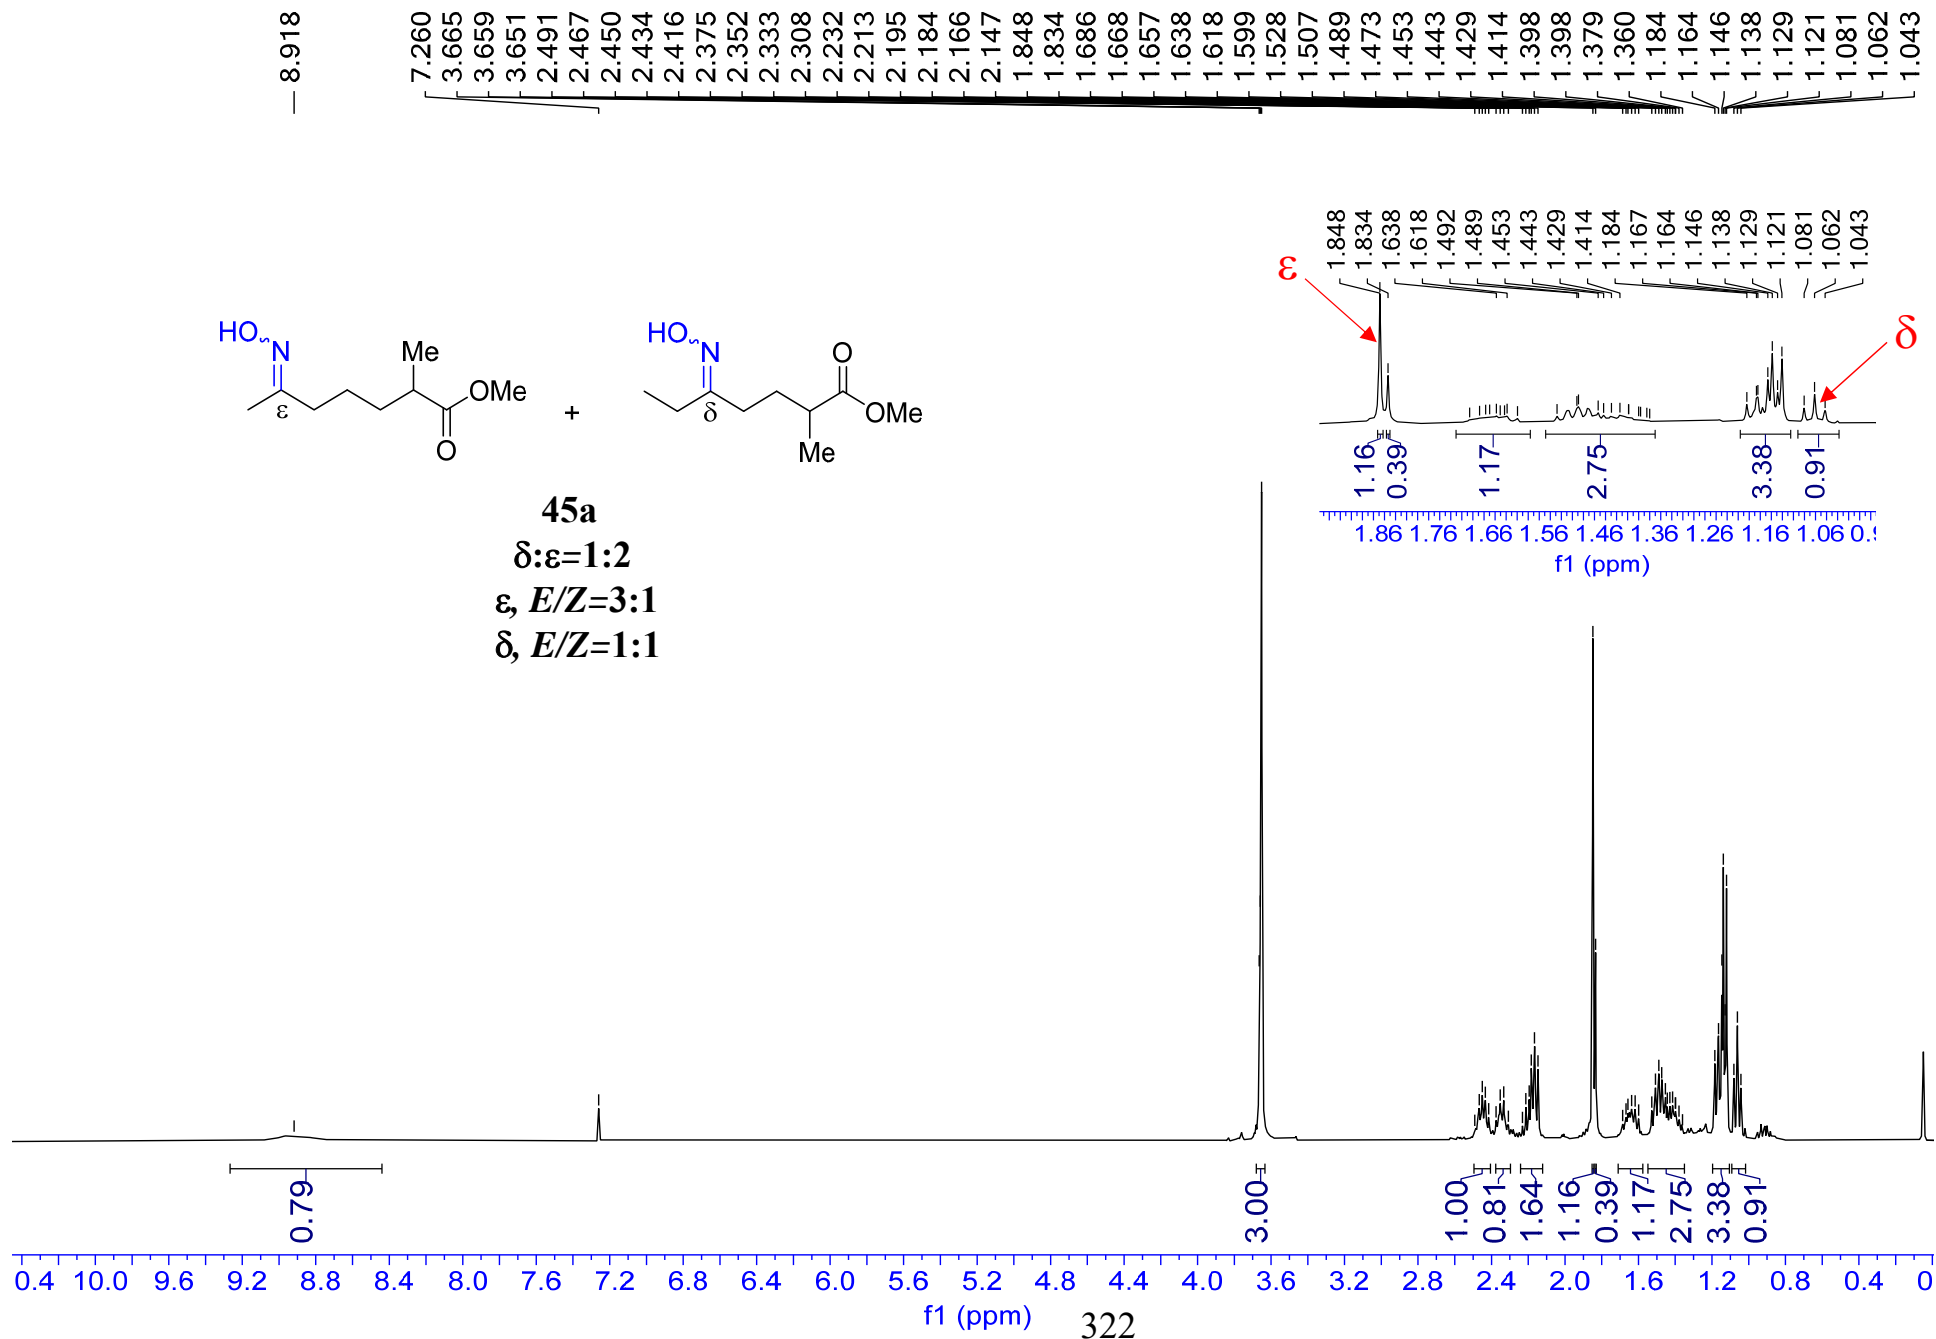

$^{13}\text{C}$  NMR 101 MHz,  $\text{CDCl}_3$

177.21  
177.17  
176.91  
162.14  
161.97  
158.53  
158.23

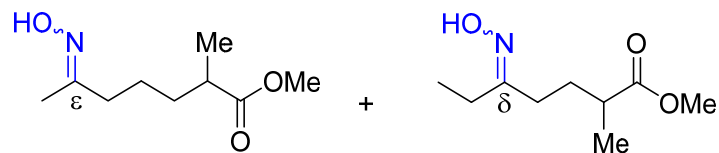

45a

$\delta:\epsilon=1:2$

$\epsilon$ ,  $E/Z=3:1$

$\delta$ ,  $E/Z=1:1$

77.48  
77.16  
76.84  
51.75  
51.72  
51.67  
39.58  
39.30  
39.03  
35.68  
33.67  
33.24  
31.37  
30.11  
29.42  
28.39  
27.54  
25.45  
23.97  
23.22  
20.98  
19.88  
19.53  
18.23  
17.17  
17.13  
13.42  
10.78  
10.16

$\delta$

$\epsilon$

162.2  
161.4  
160.6  
159.8  
159.0  
158.2  
157.0  
f1 (ppm)

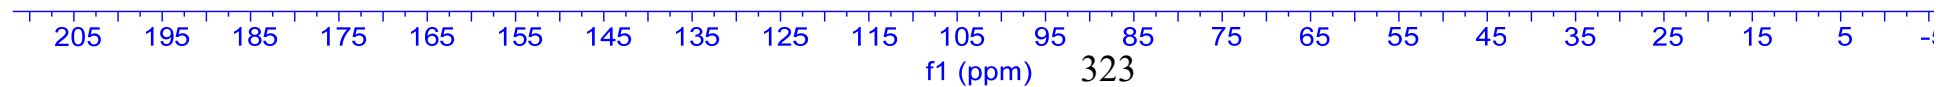

<sup>1</sup>H NMR, 400 MHz, CDCl<sub>3</sub>

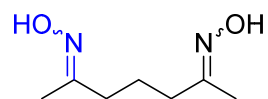

**46a**

*EE/ZE/ZZ=3.6:1.2:1*

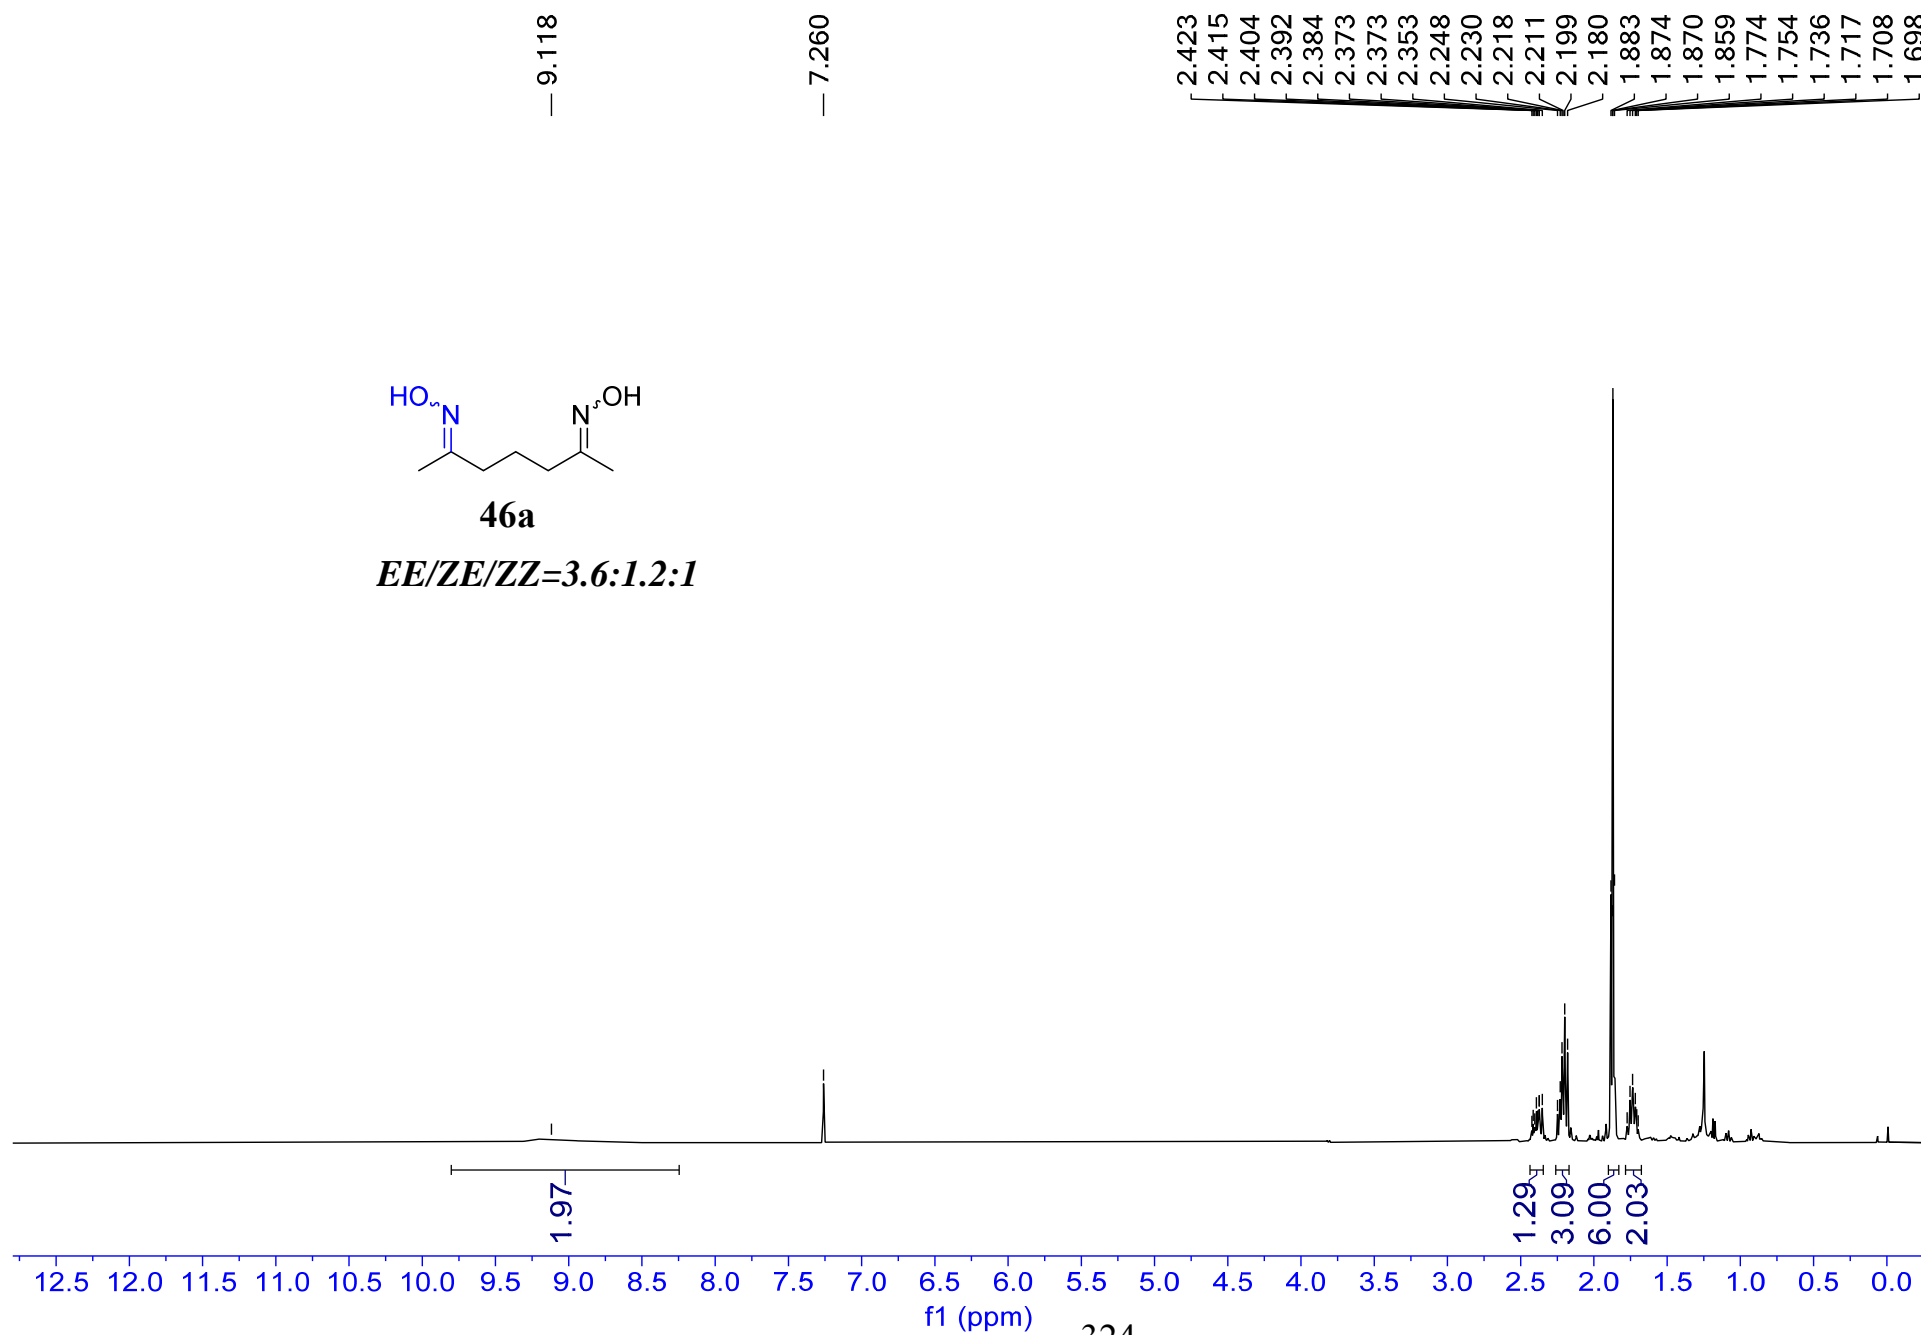



<sup>13</sup>C NMR 101 MHz, CDCl<sub>3</sub>

158.43  
158.13  
158.05

77.48  
77.16  
76.84

35.75  
35.16  
29.84  
28.25  
22.79  
22.21  
19.96  
13.59

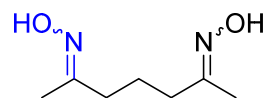

**46a**

*EE/ZE/ZZ=3.6:1.2:1*

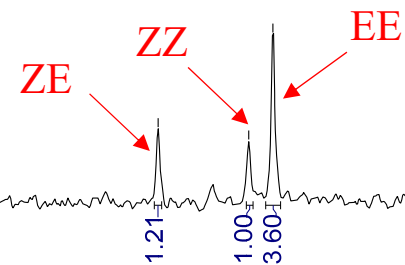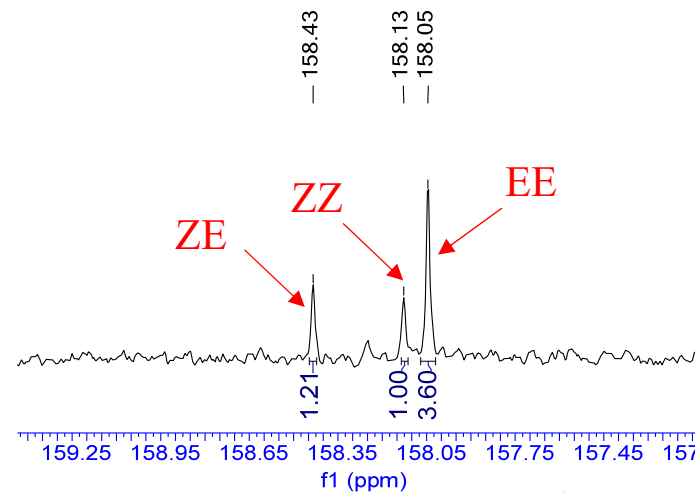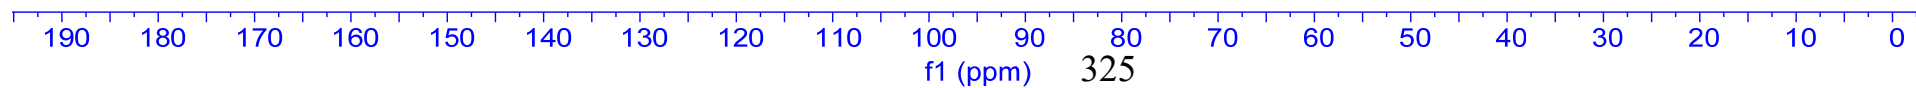

<sup>1</sup>H NMR, 400 MHz, CDCl<sub>3</sub>

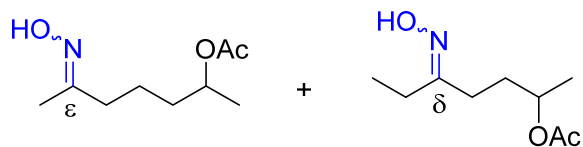

**47a**

δ:ε=1:3

ε, *E/Z*=3:1

δ, *E/Z*=1:1

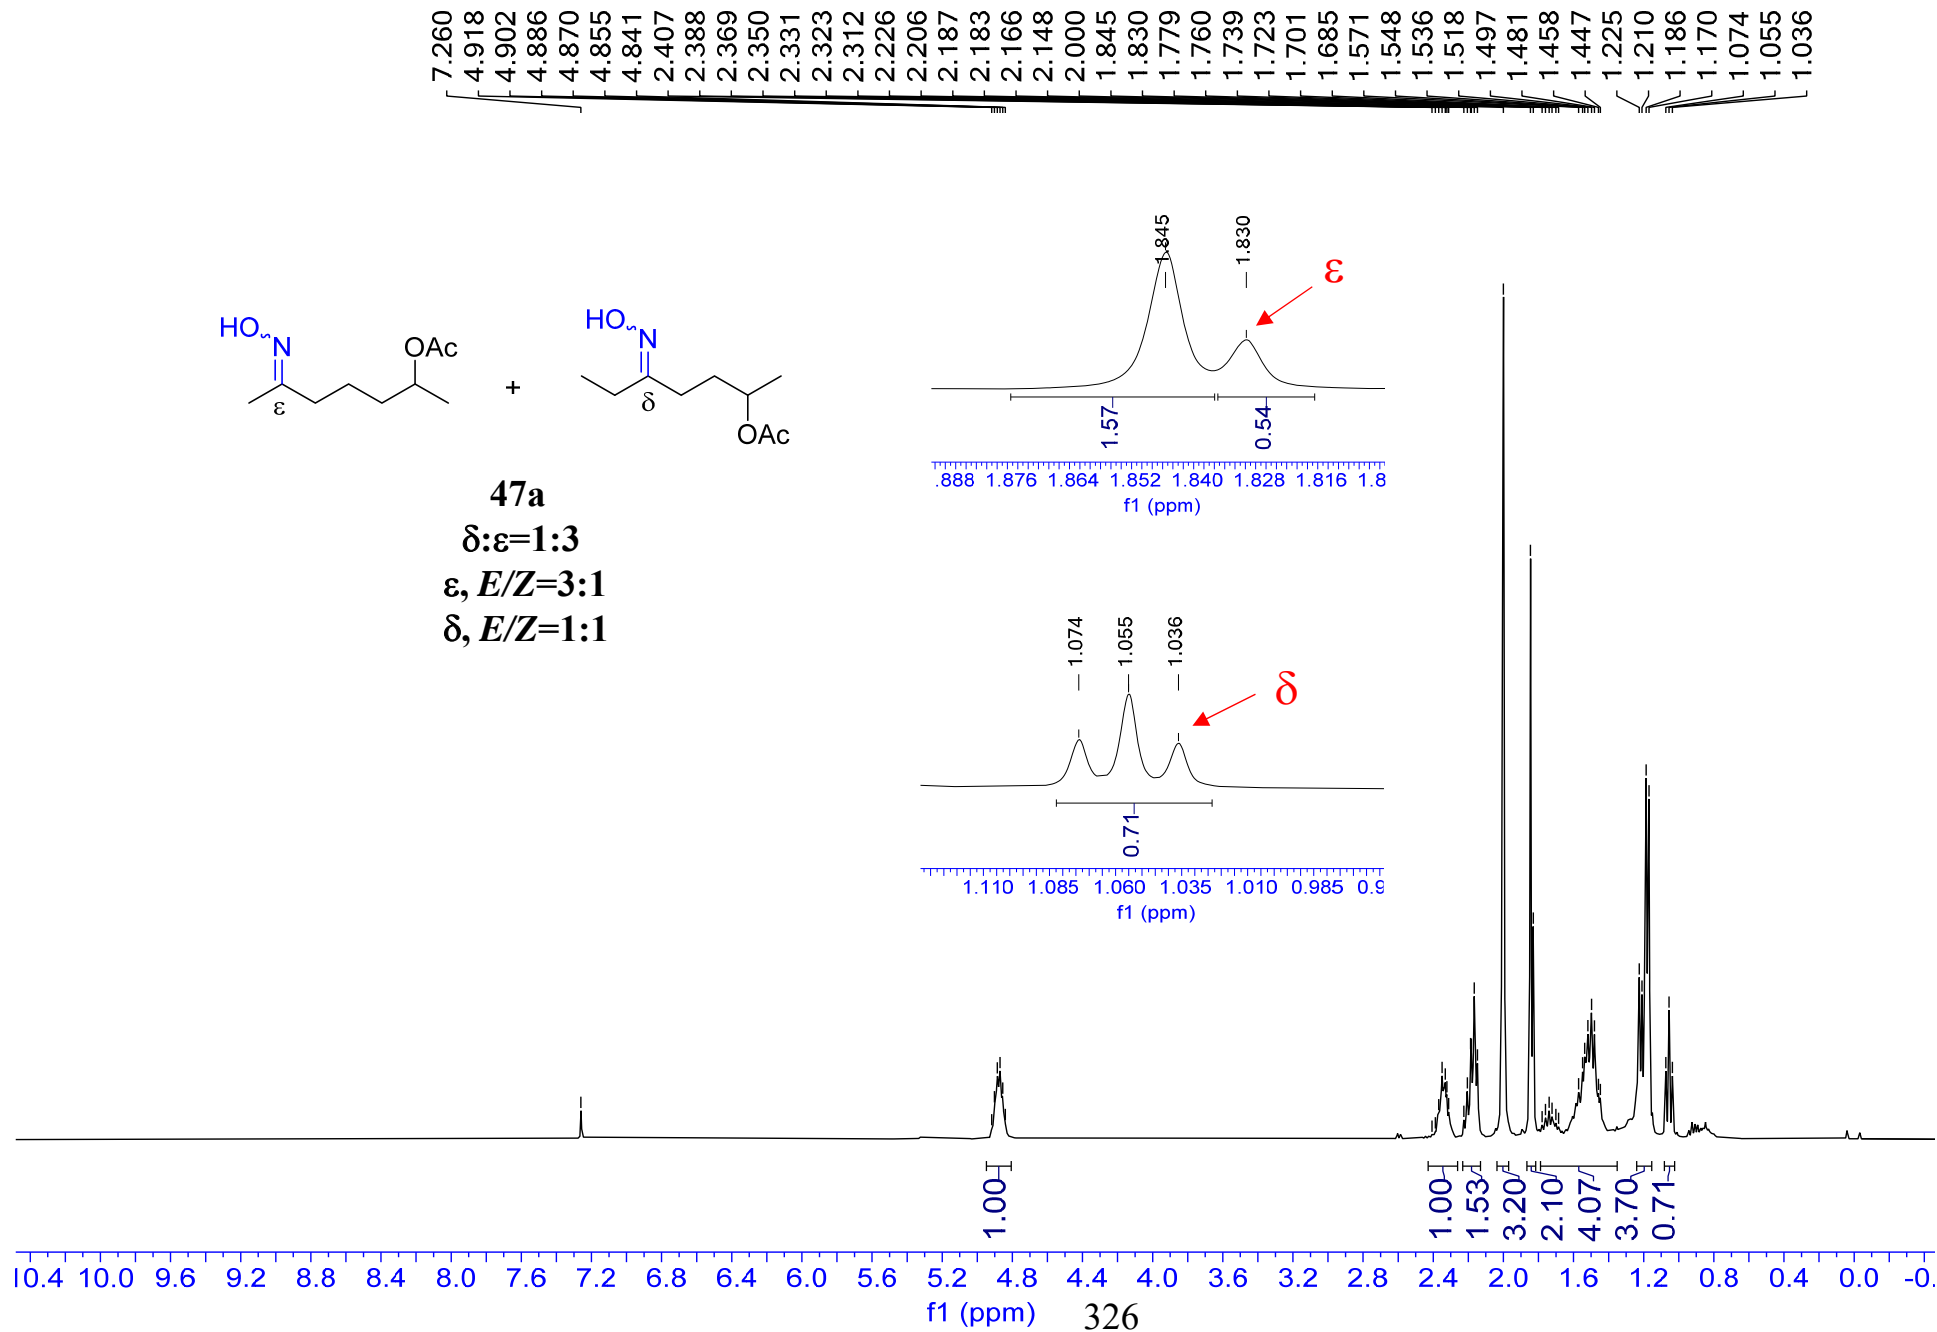

$^{13}\text{C}$  NMR 101 MHz,  $\text{CDCl}_3$

— 170.96  
 161.96  
 161.77  
 158.43  
 158.14

77.48  
 77.16  
 76.84  
 70.94  
 70.72  
 70.57  
 35.80  
 35.56  
 35.37  
 32.27  
 31.62  
 29.74  
 29.38  
 28.35  
 27.53  
 23.78  
 22.16  
 21.46  
 21.40  
 21.37  
 21.04  
 20.01  
 19.96  
 19.85  
 19.82  
 13.46  
 10.79  
 10.12

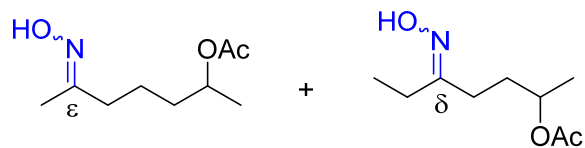

**47a**

$\delta:\epsilon=1:3$

$\epsilon, E/Z=3:1$

$\delta, E/Z=1:1$

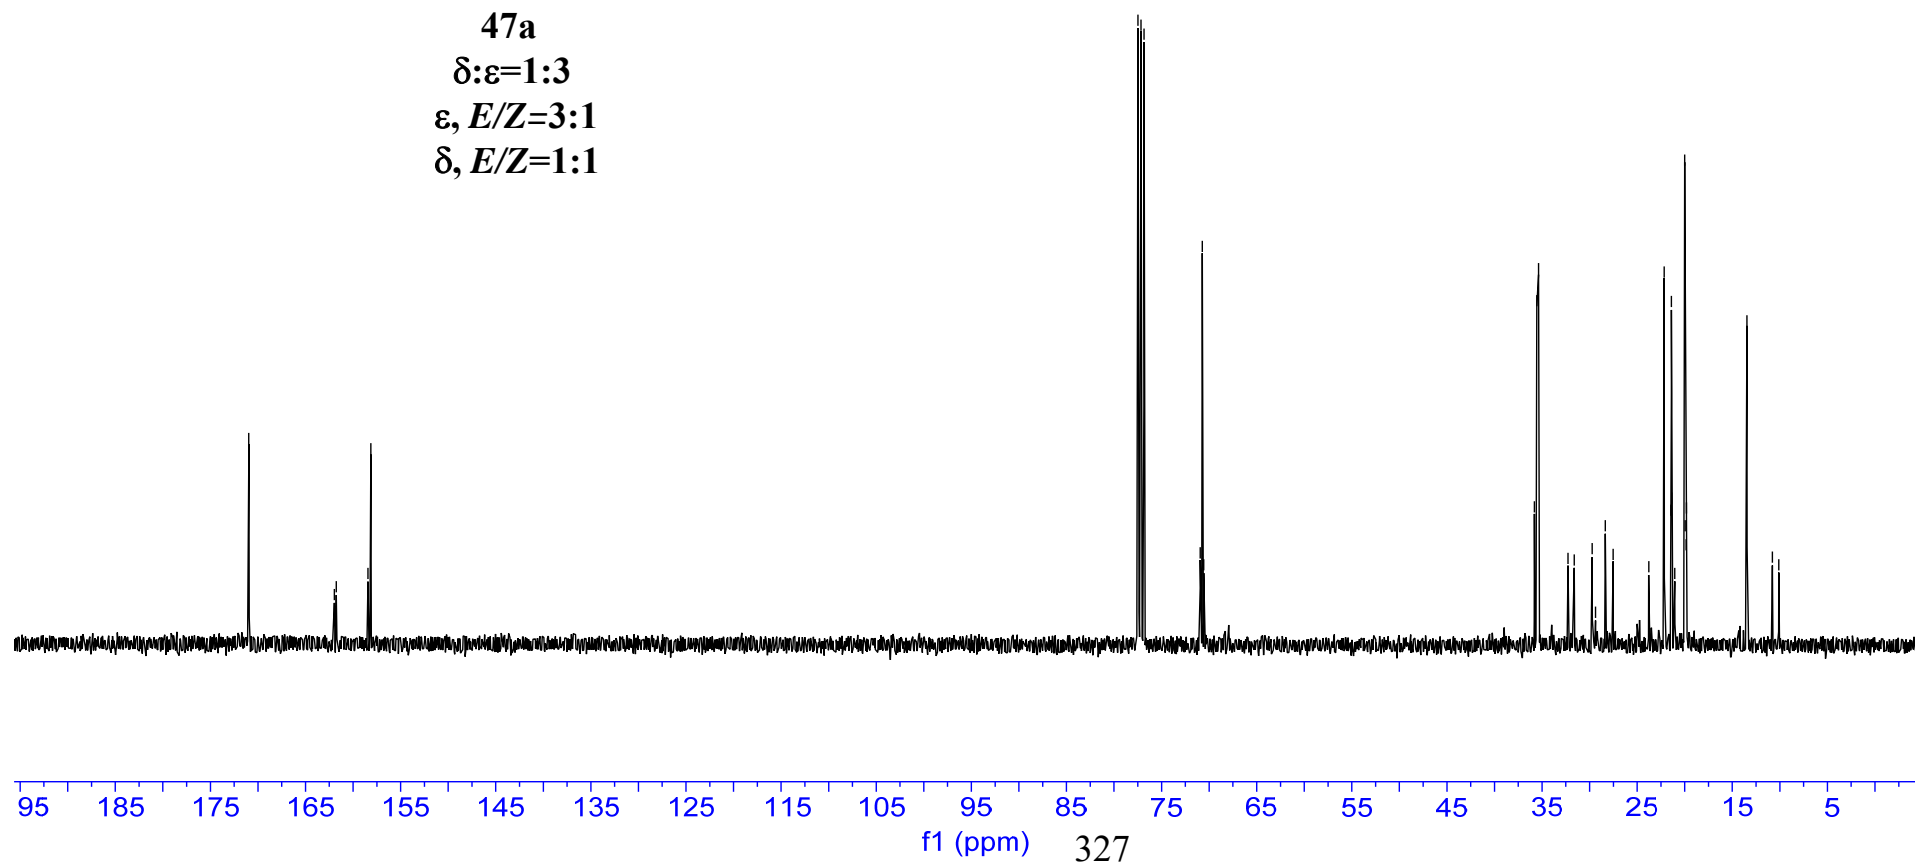

<sup>1</sup>H NMR, 400 MHz, CDCl<sub>3</sub>

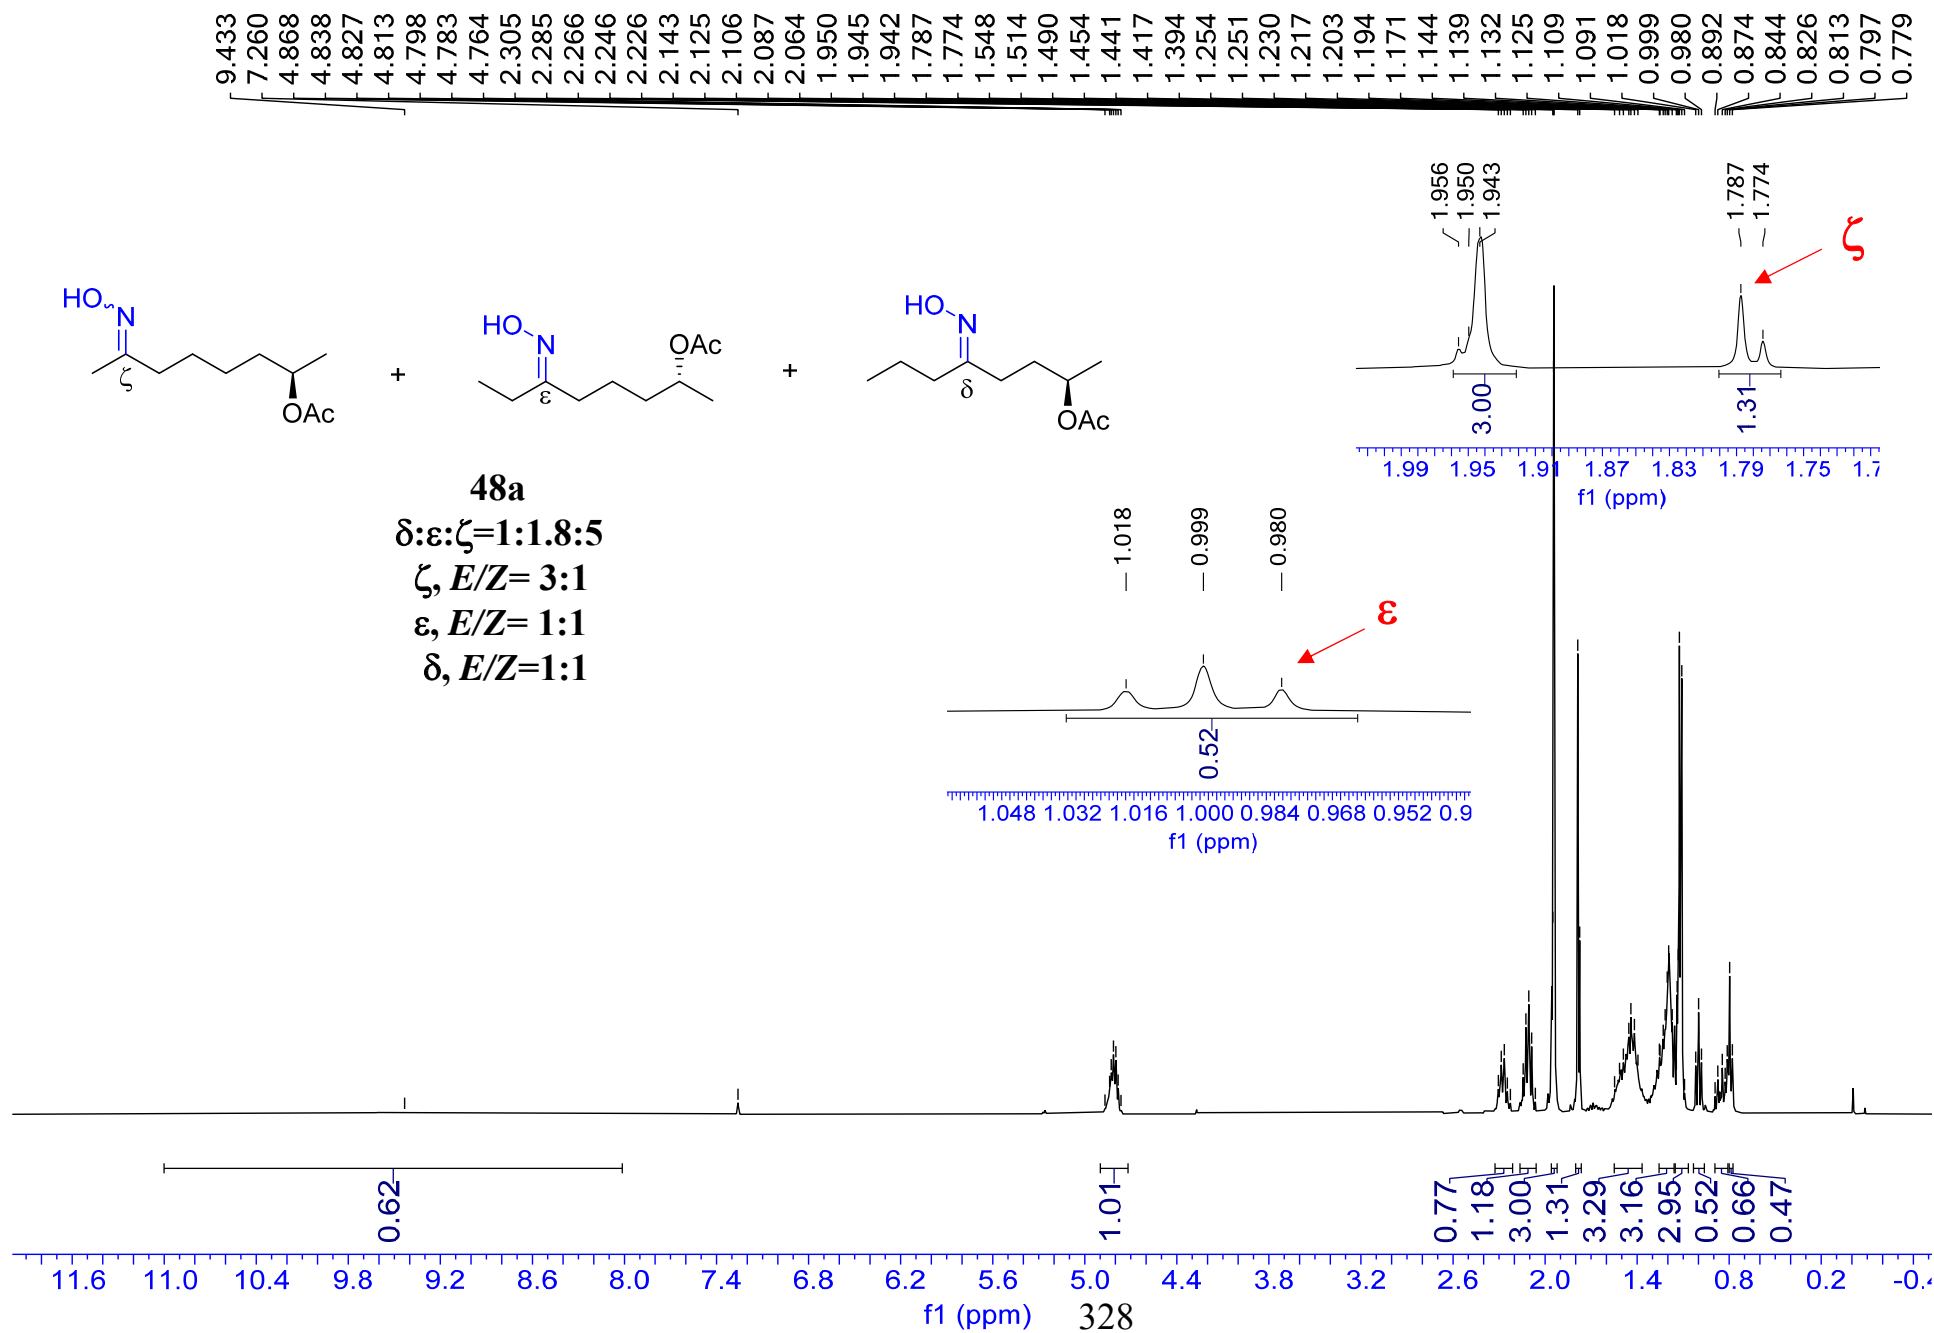

$^{13}\text{C}$  NMR 101 MHz,  $\text{CDCl}_3$

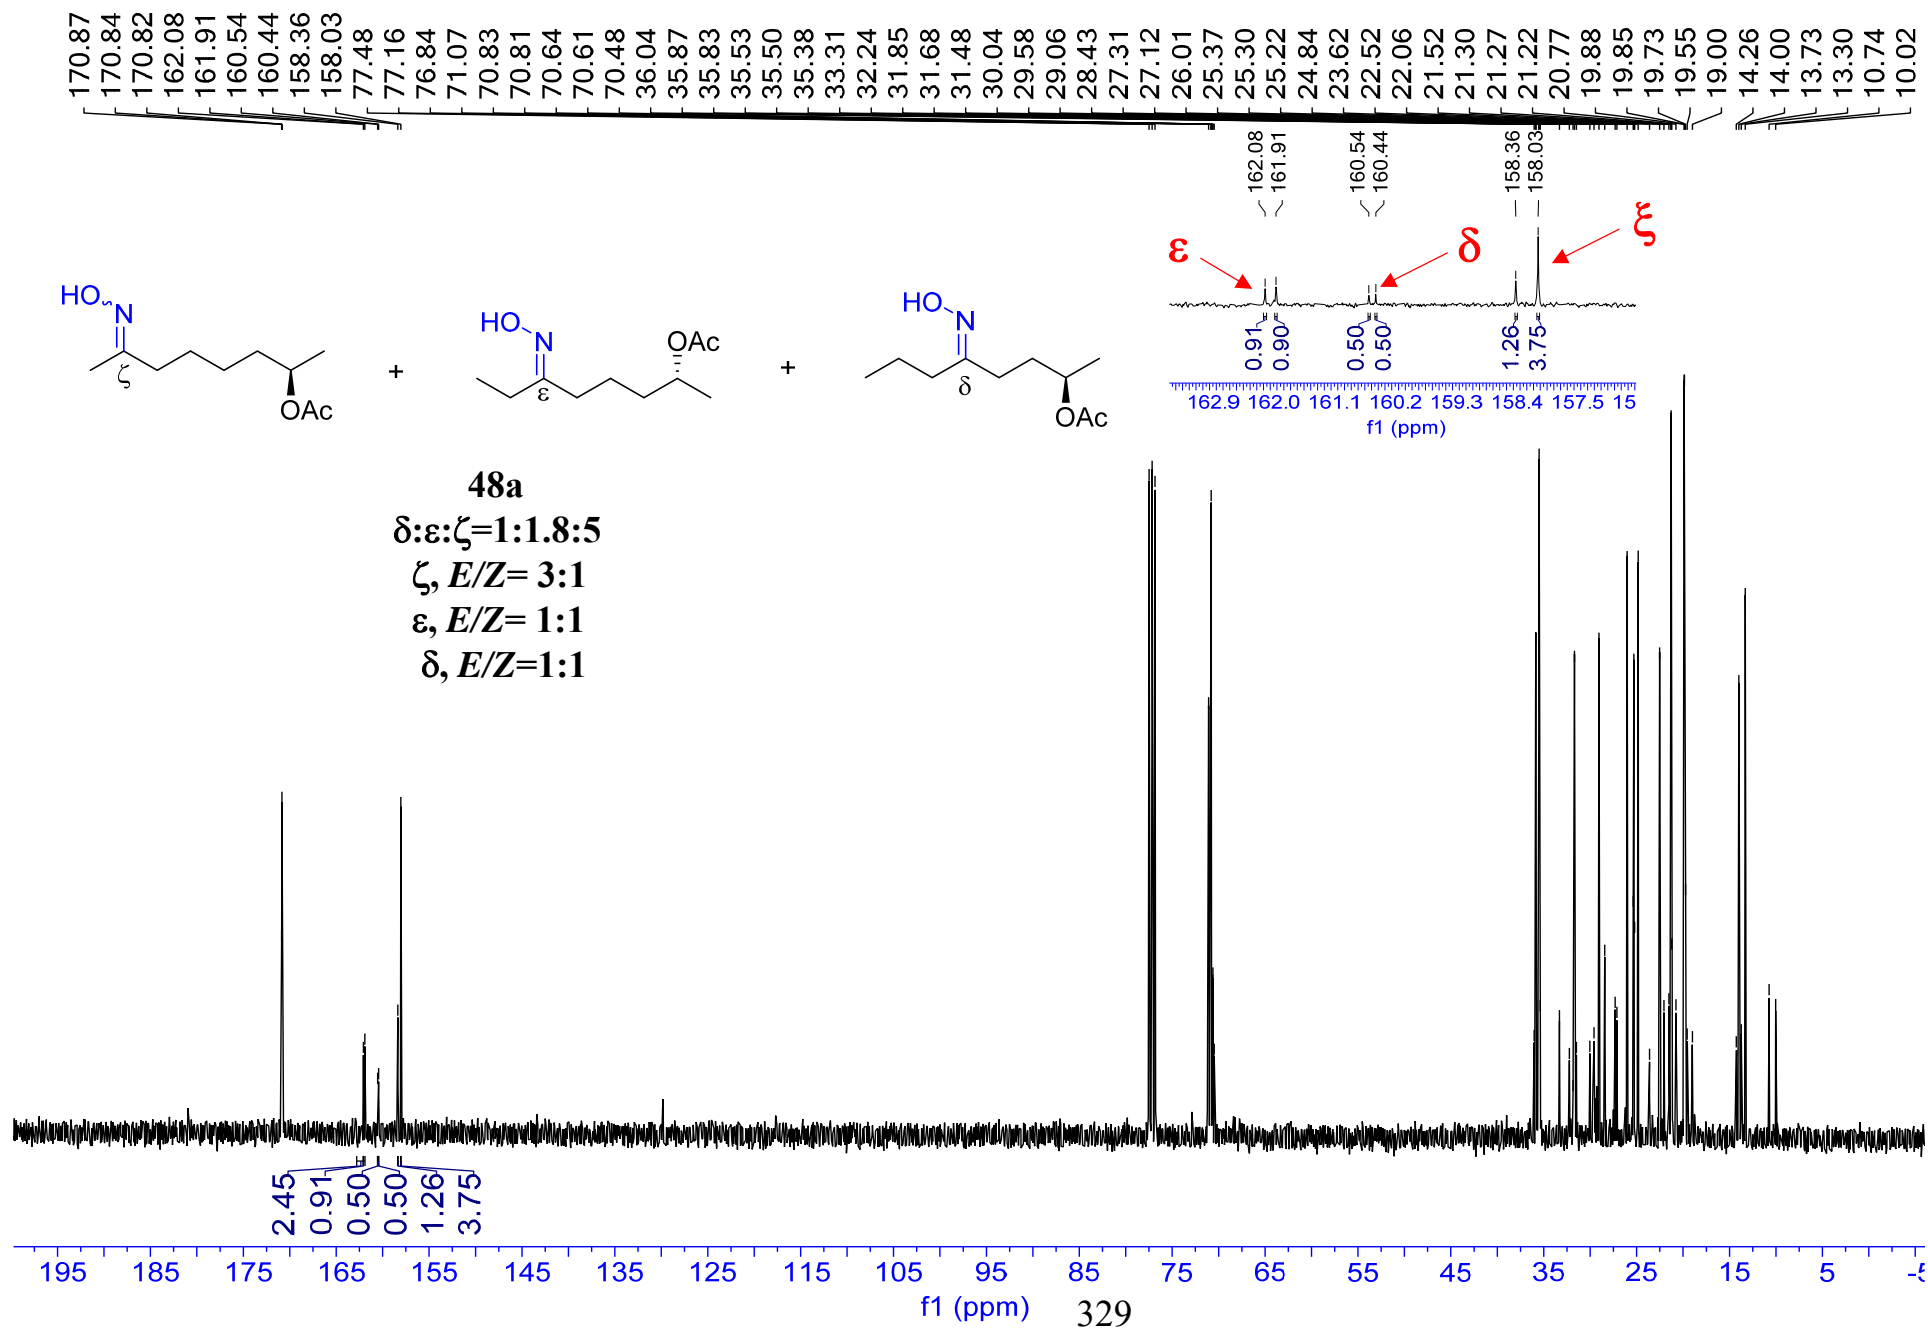

<sup>1</sup>H NMR, 400 MHz, CDCl<sub>3</sub>

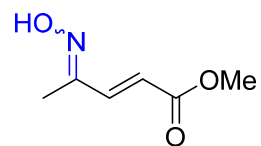

**49a**

(2*E*,4*E*)/(2*E*,4*Z*)=2:1

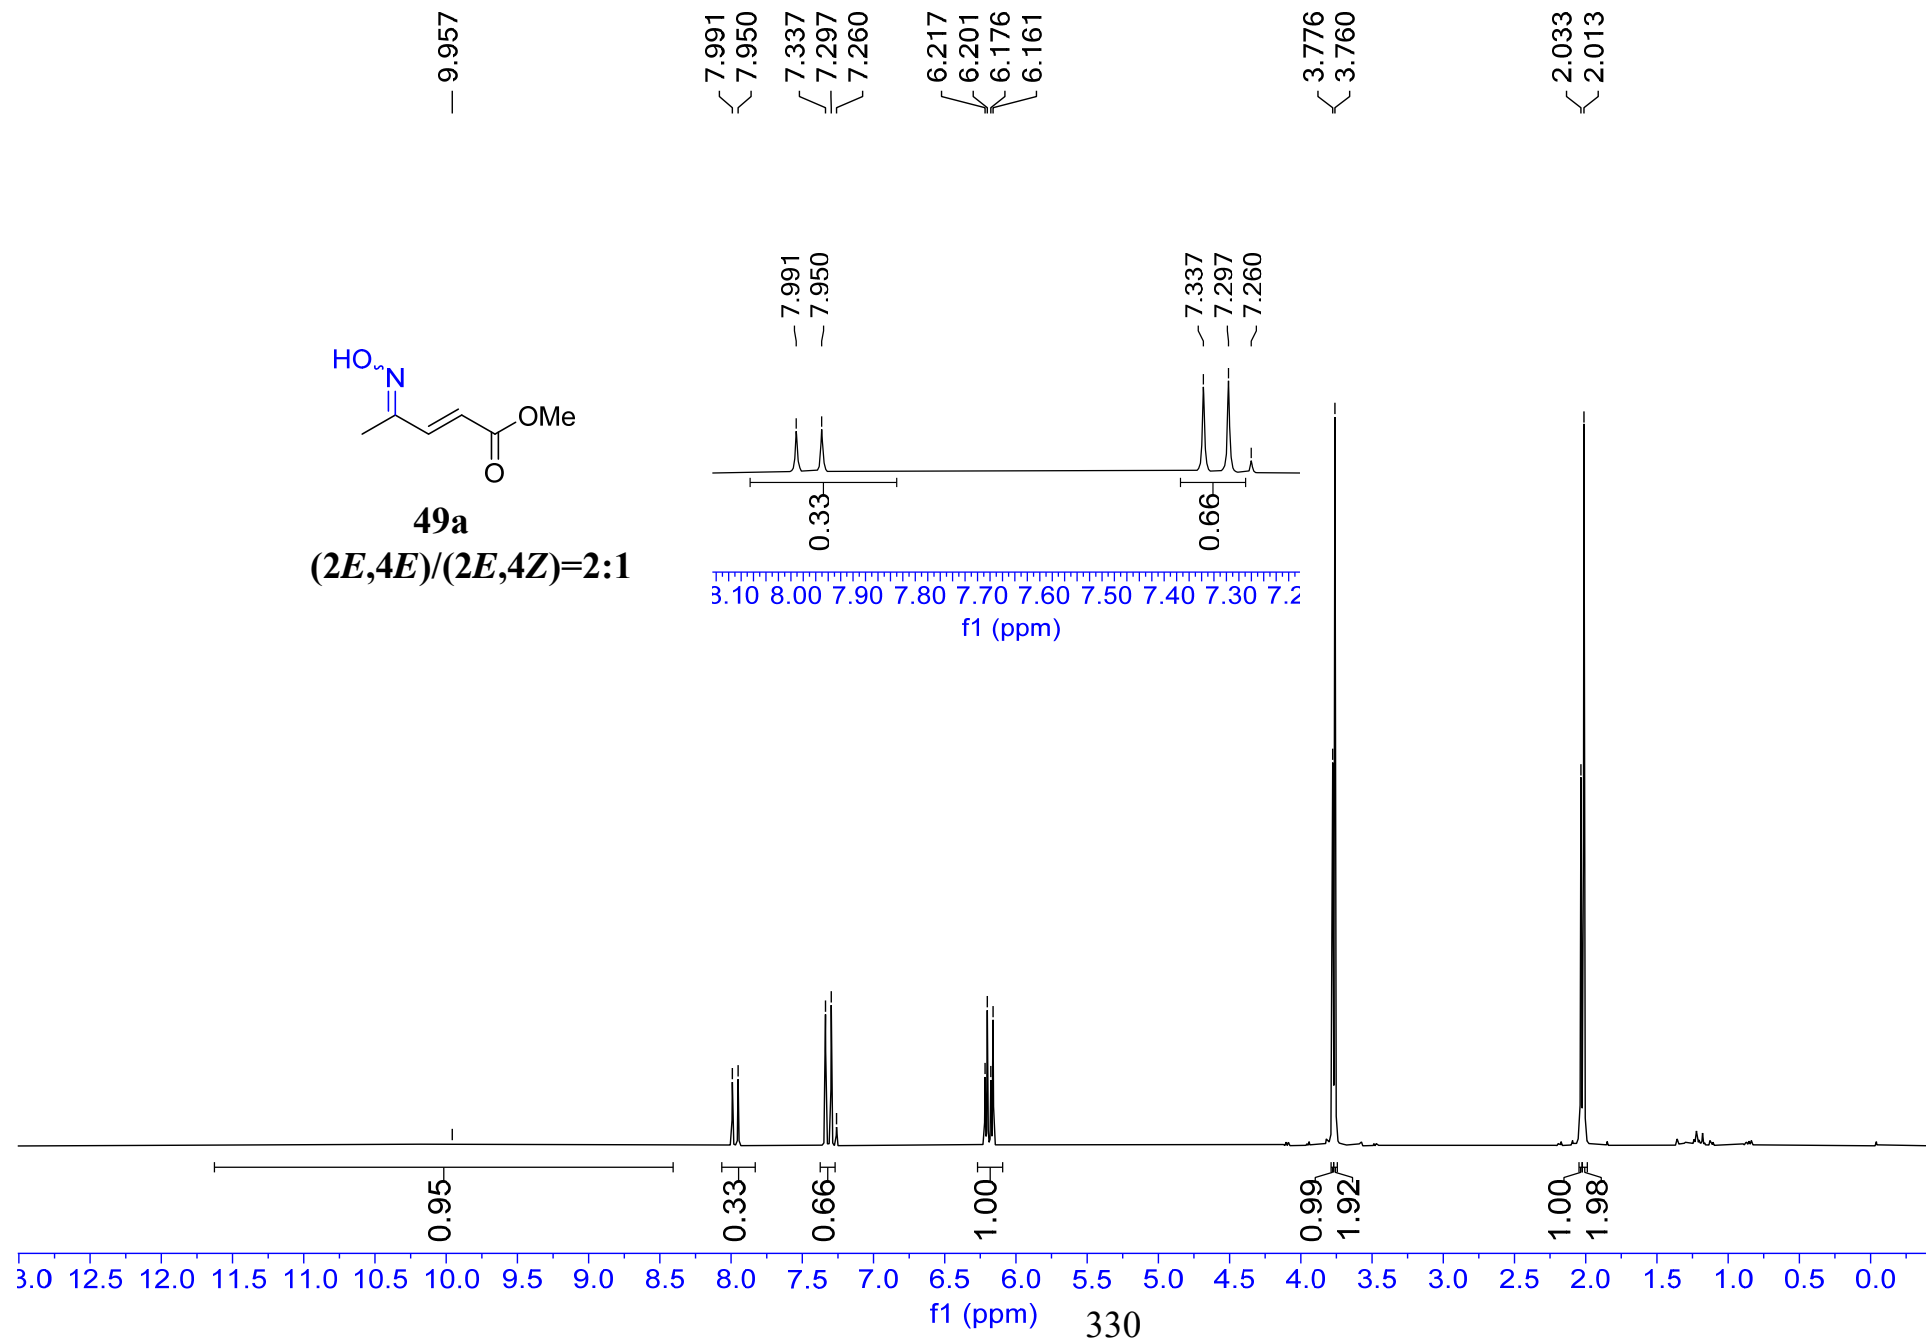

<sup>13</sup>C NMR 101 MHz, CDCl<sub>3</sub>

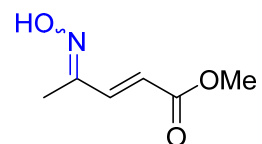

**49a**  
(2*E*,4*E*)/(2*E*,4*Z*)=2:1

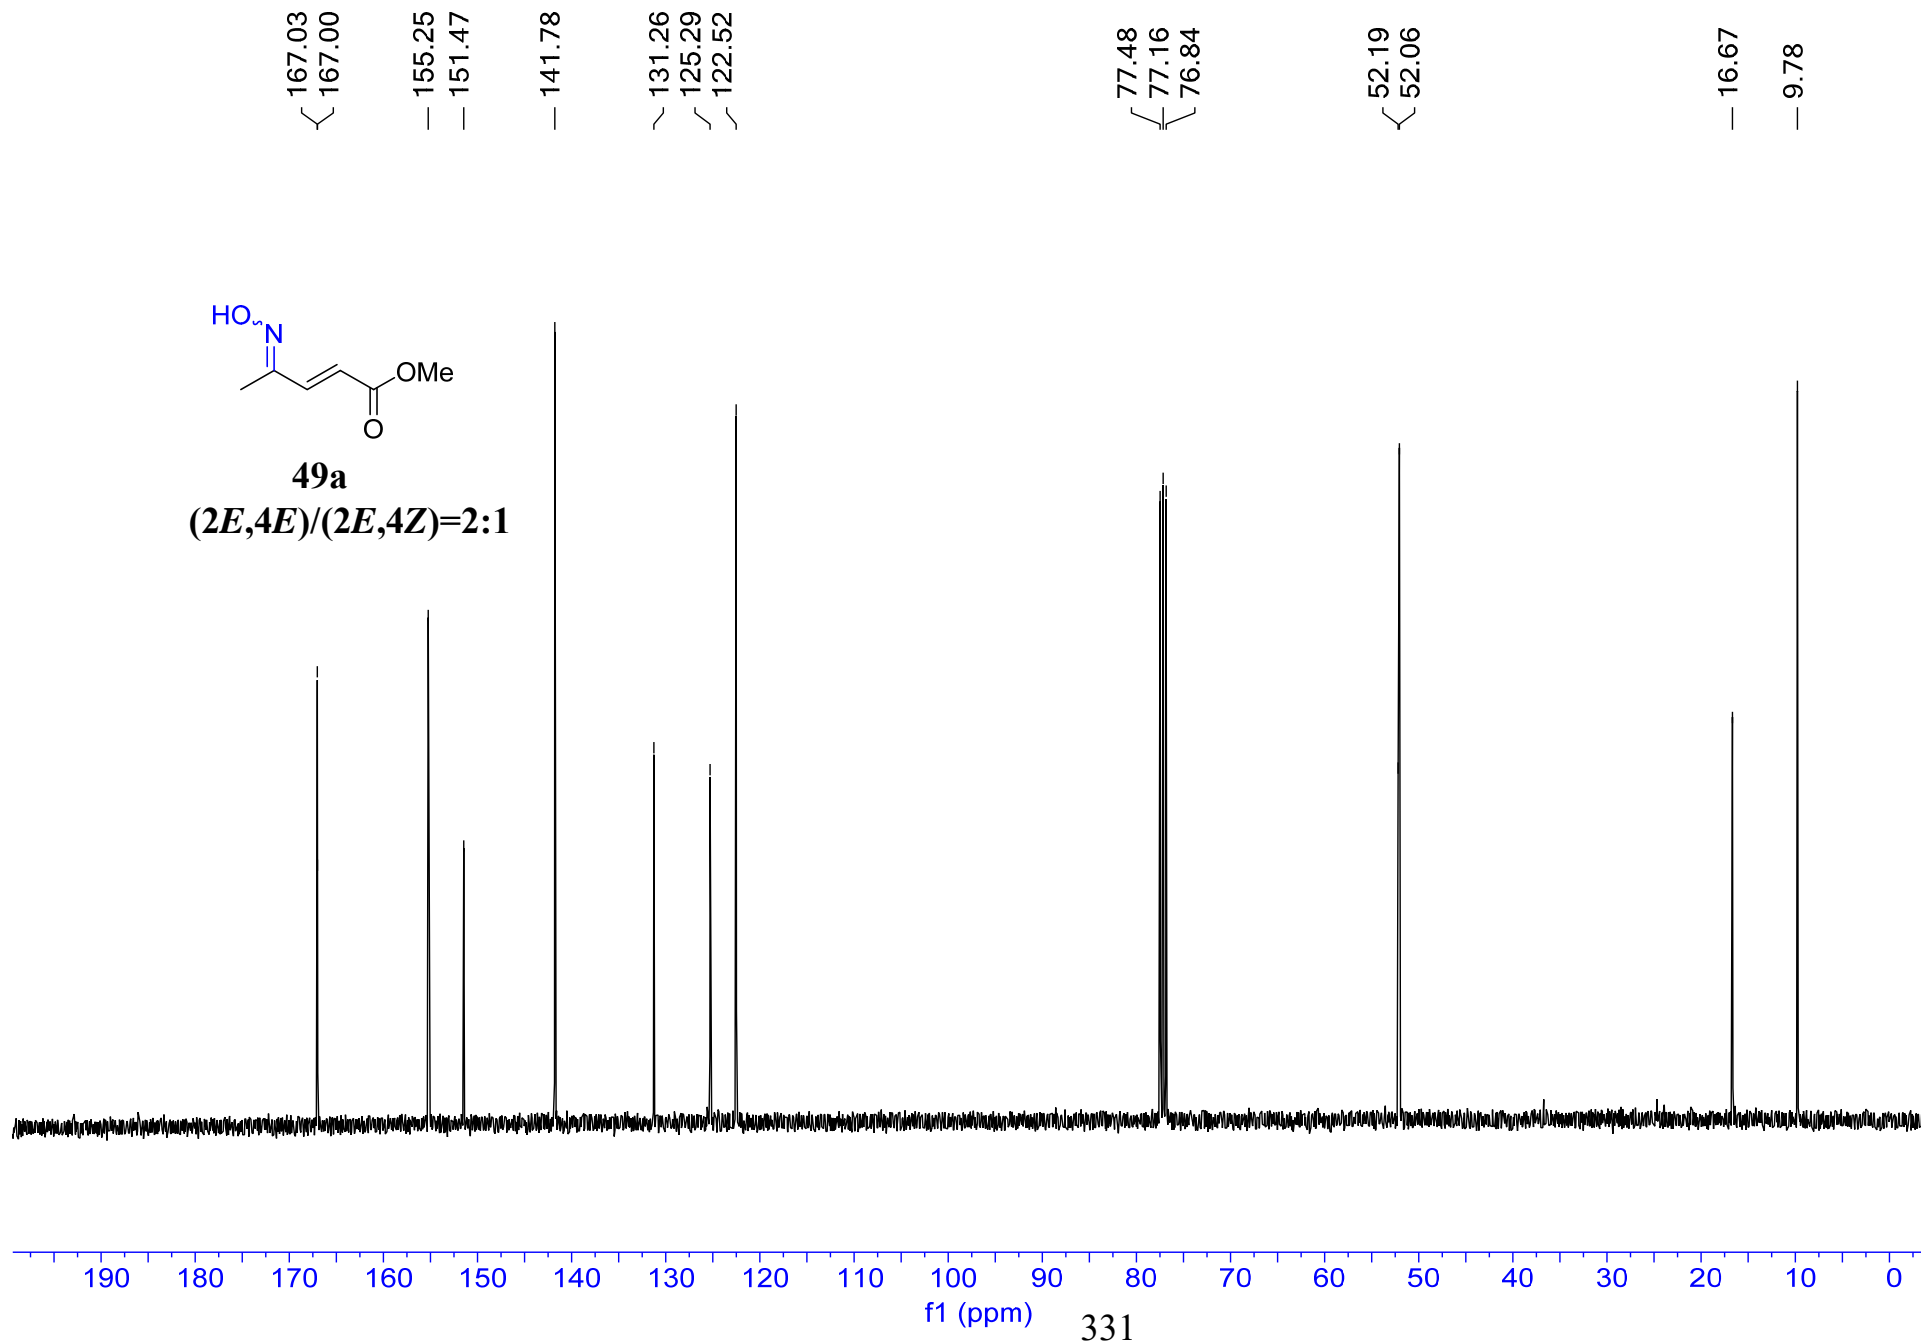

<sup>1</sup>H NMR, 400 MHz, CDCl<sub>3</sub>

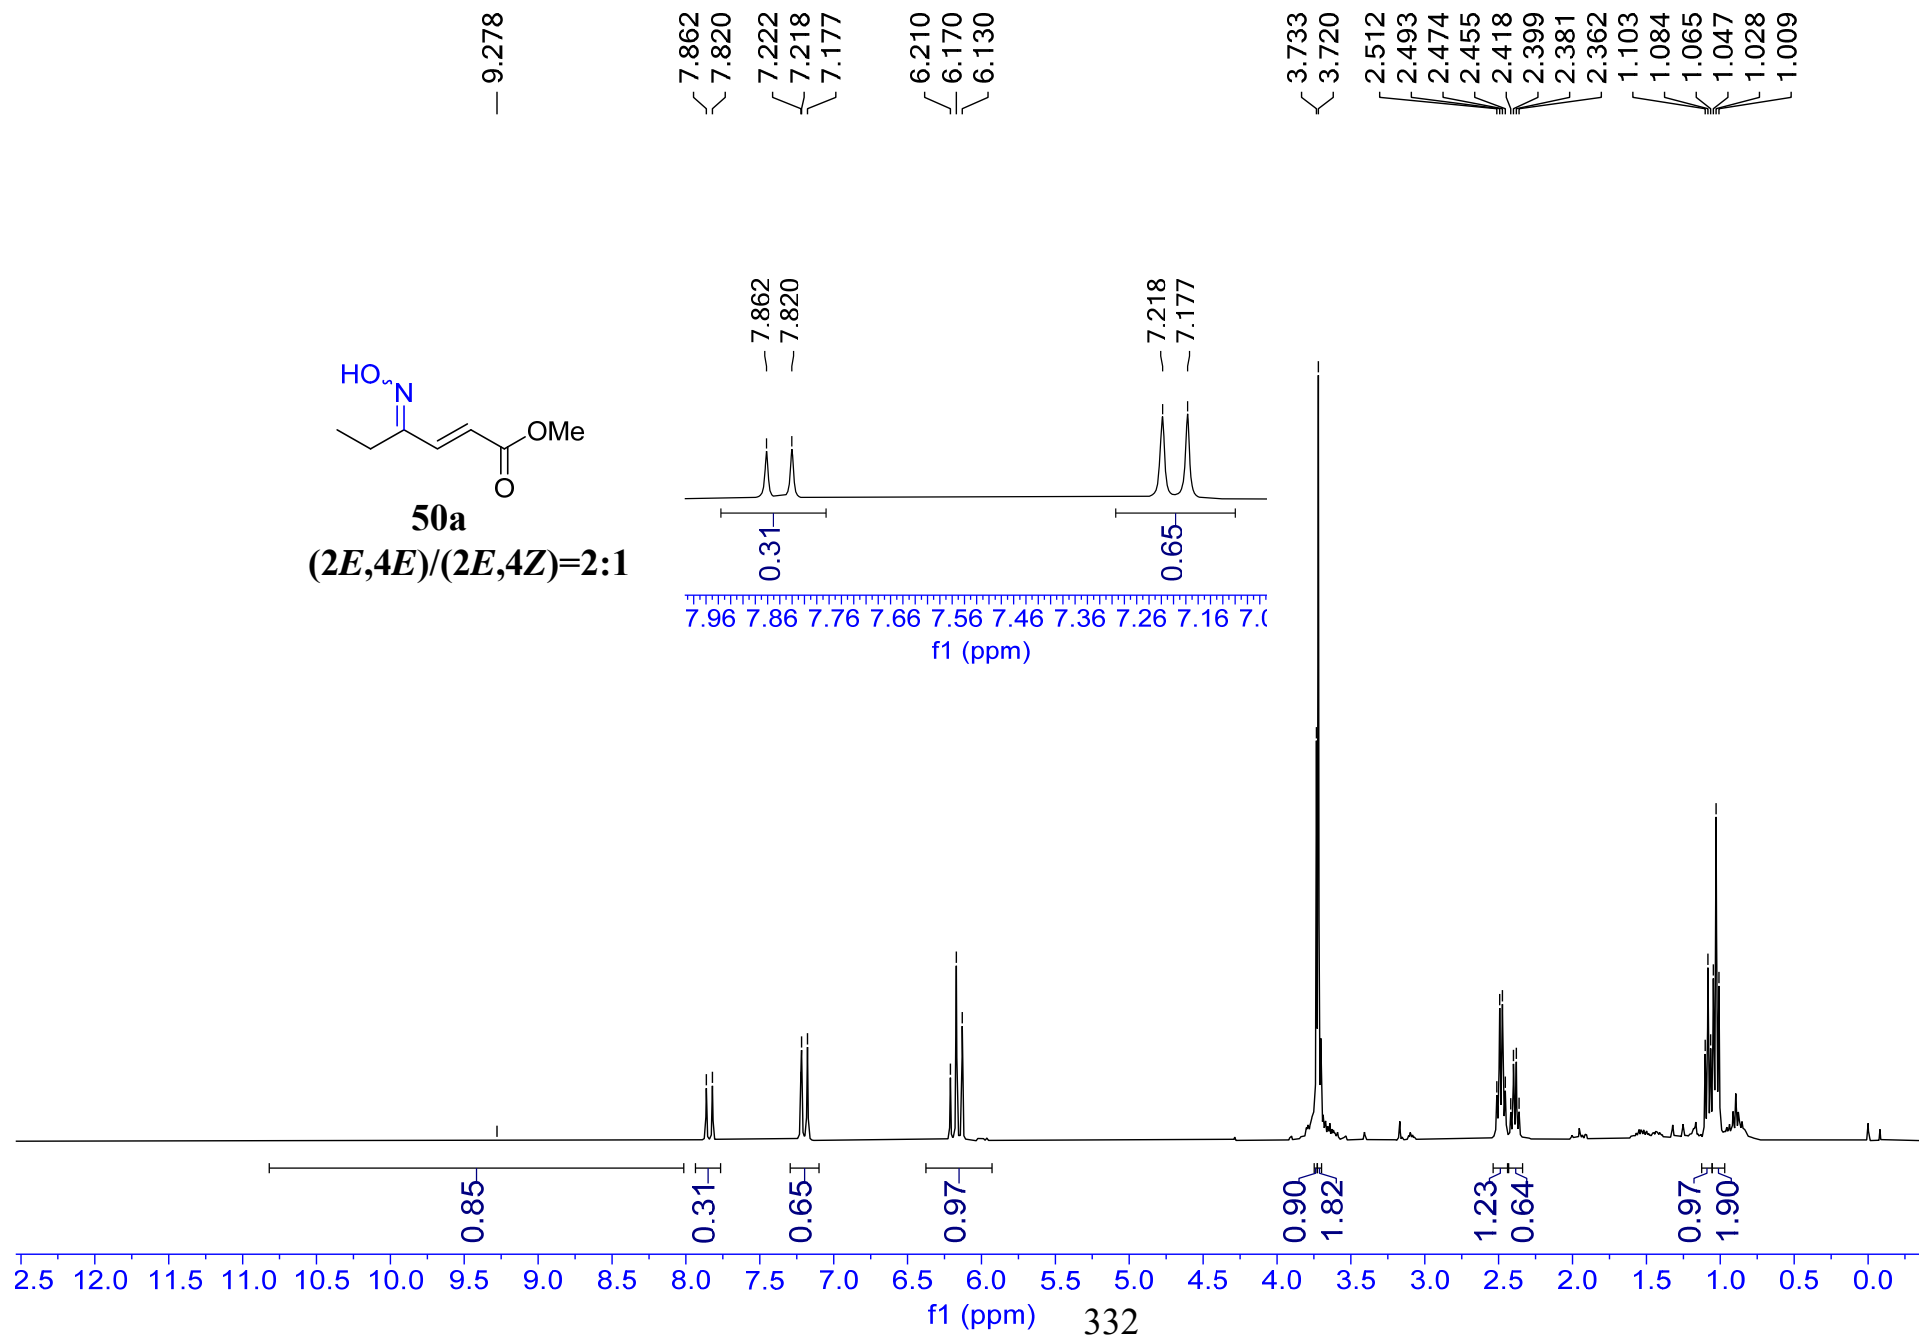



<sup>13</sup>C NMR 101 MHz, CDCl<sub>3</sub>

167.07  
167.06

159.94

155.31

140.86

130.75

124.83

122.08

77.48  
77.16  
76.84

52.17  
52.04

24.31

17.66

11.54

10.64

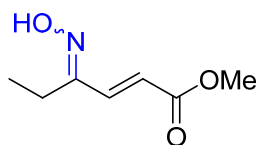

**50a**

(2*E*,4*E*)/(2*E*,4*Z*)=2:1

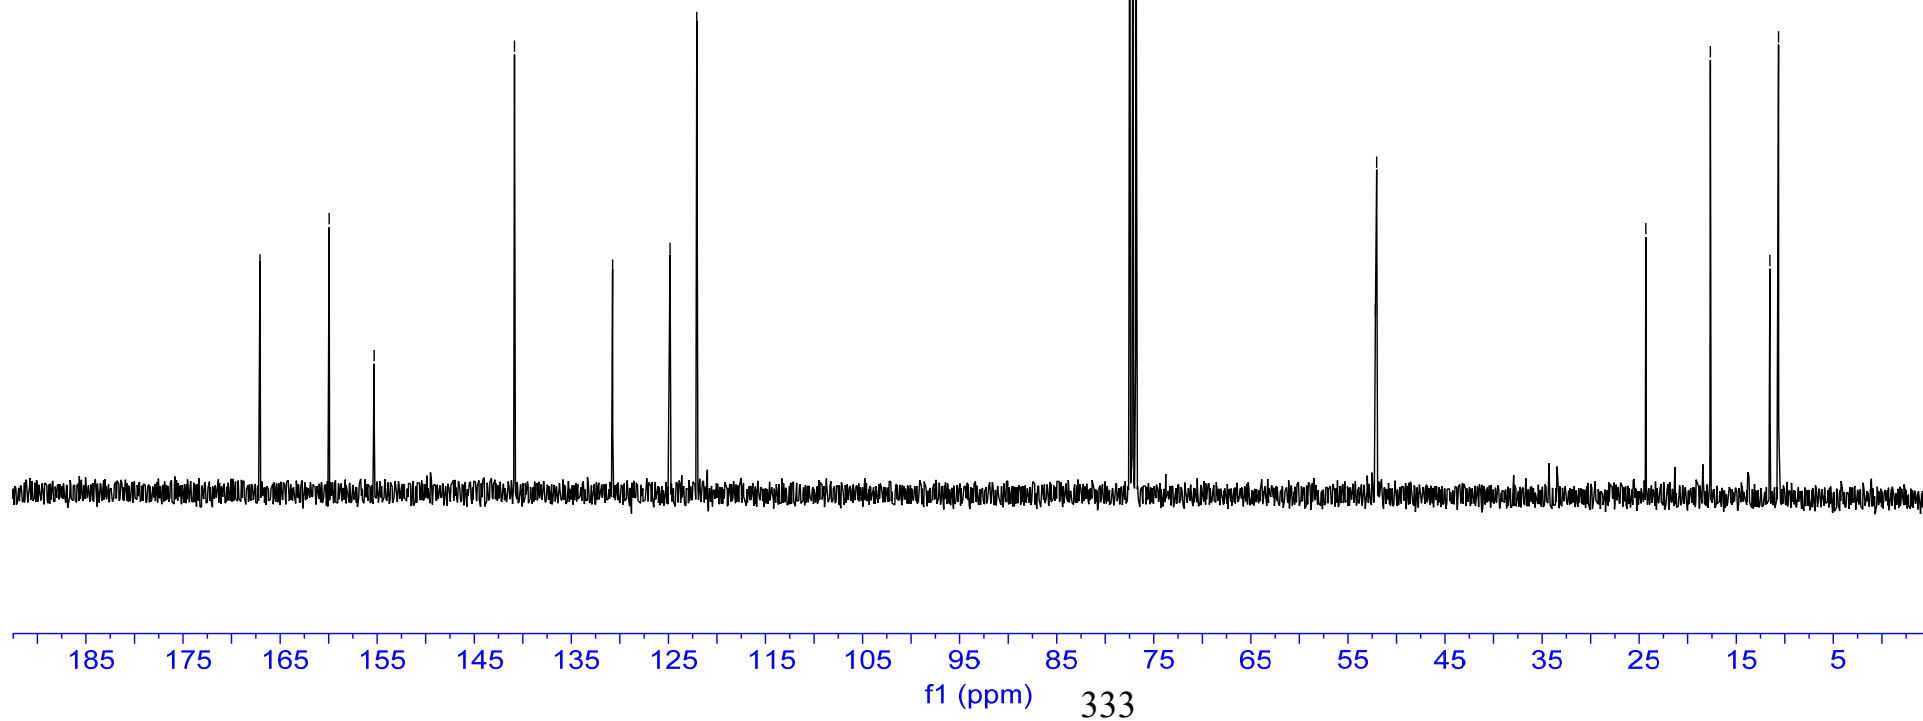

<sup>1</sup>H NMR, 400 MHz, CDCl<sub>3</sub>

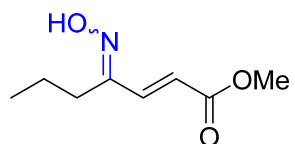

**51a**

(2*E*,4*E*)/(2*E*,4*Z*)=2:1

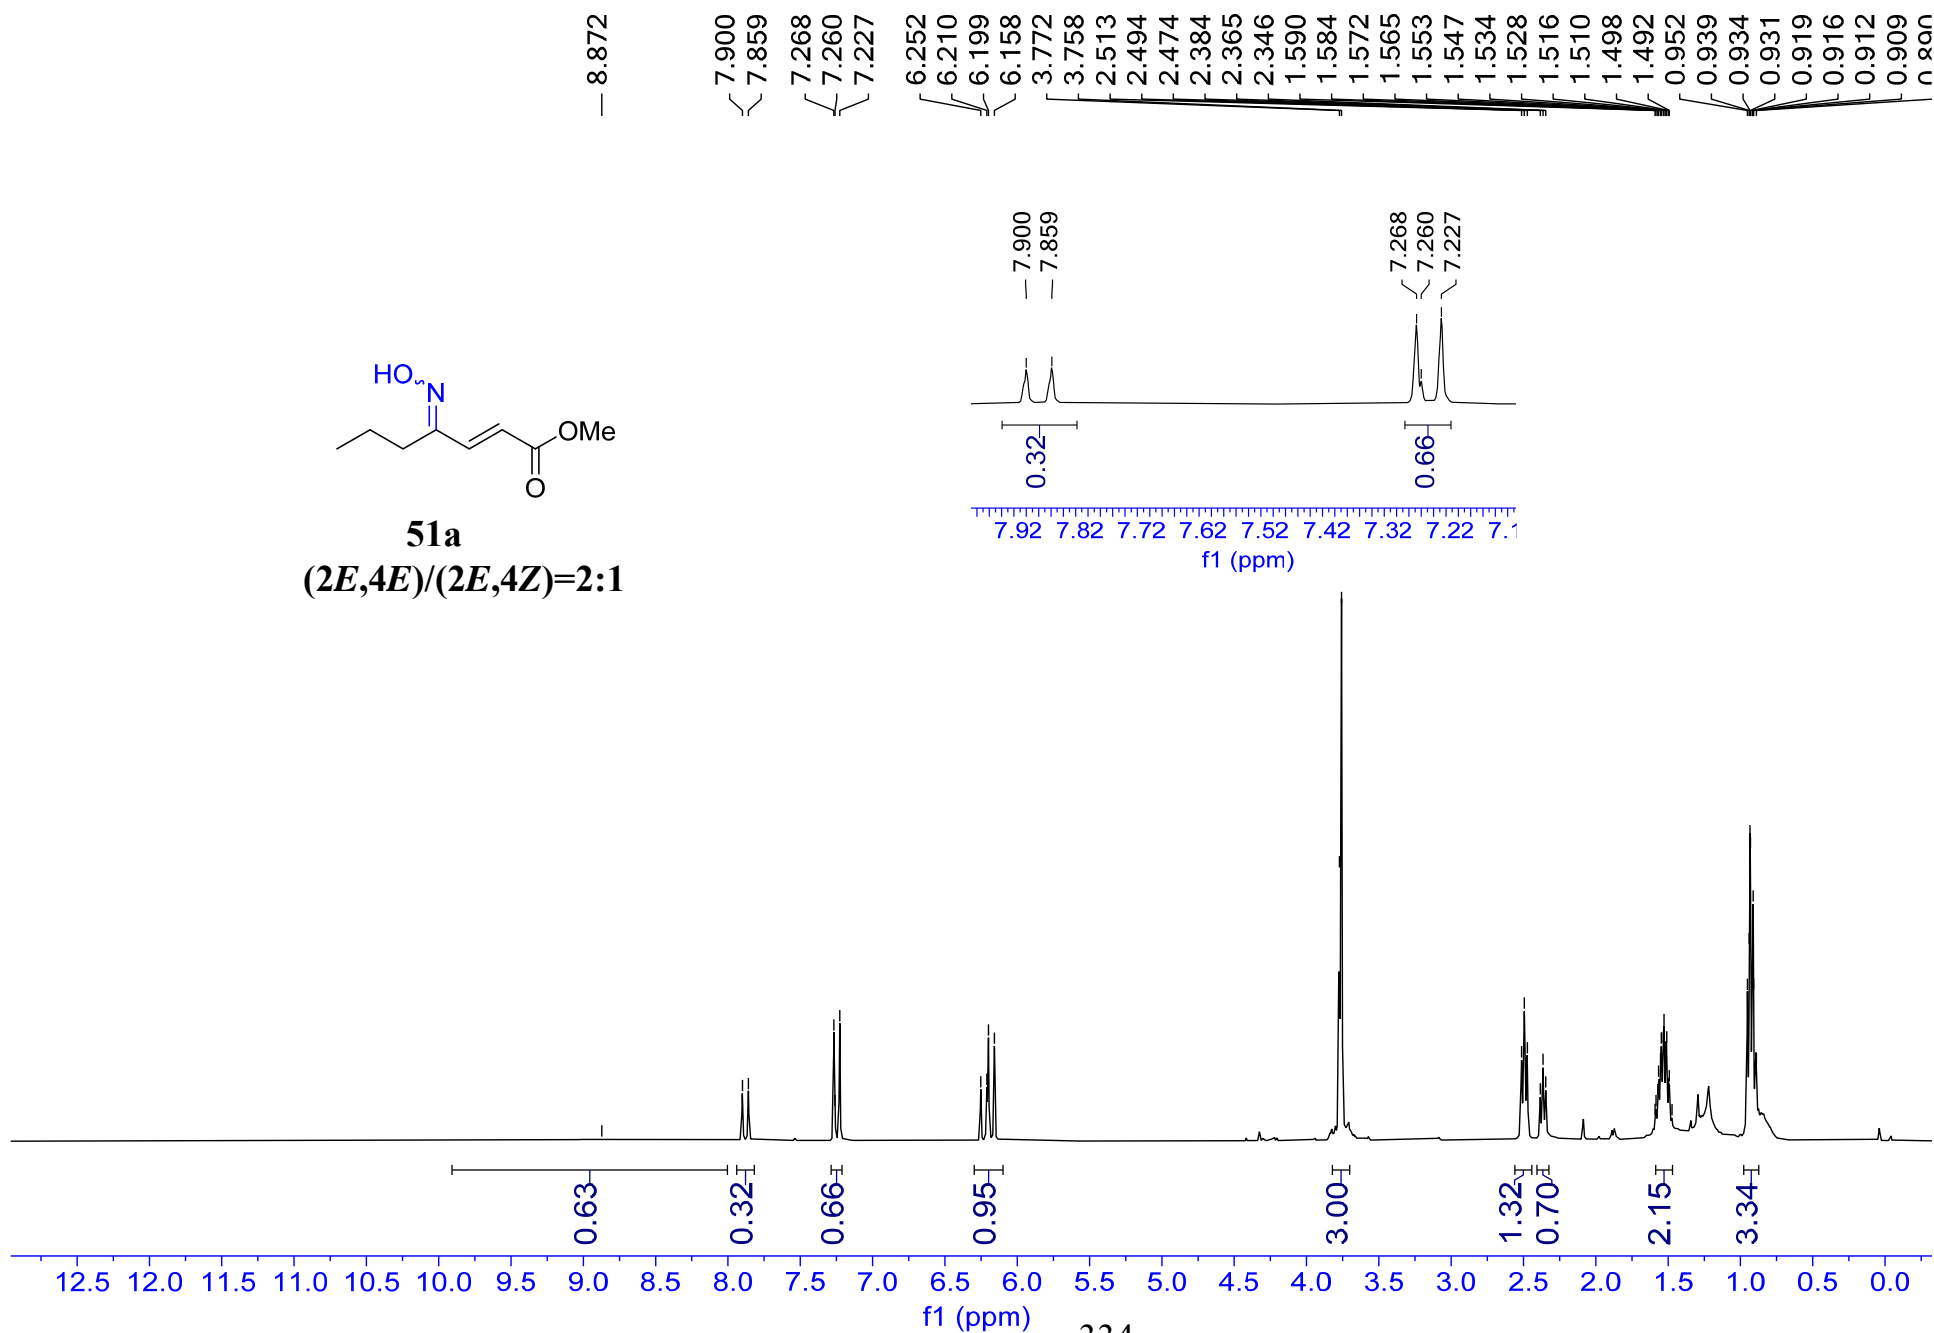

**$^{13}\text{C}$  NMR 101 MHz,  $\text{CDCl}_3$**

— 167.07

— 158.73

— 154.34

— 141.29

130.86

124.93

122.19

77.48

77.16

76.84

52.16

52.02

— 32.84

— 26.17

20.60

19.69

14.26

13.79

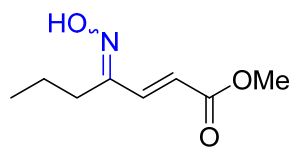

**51a**  
**(2*E*,4*E*)/(2*E*,4*Z*)=2:1**

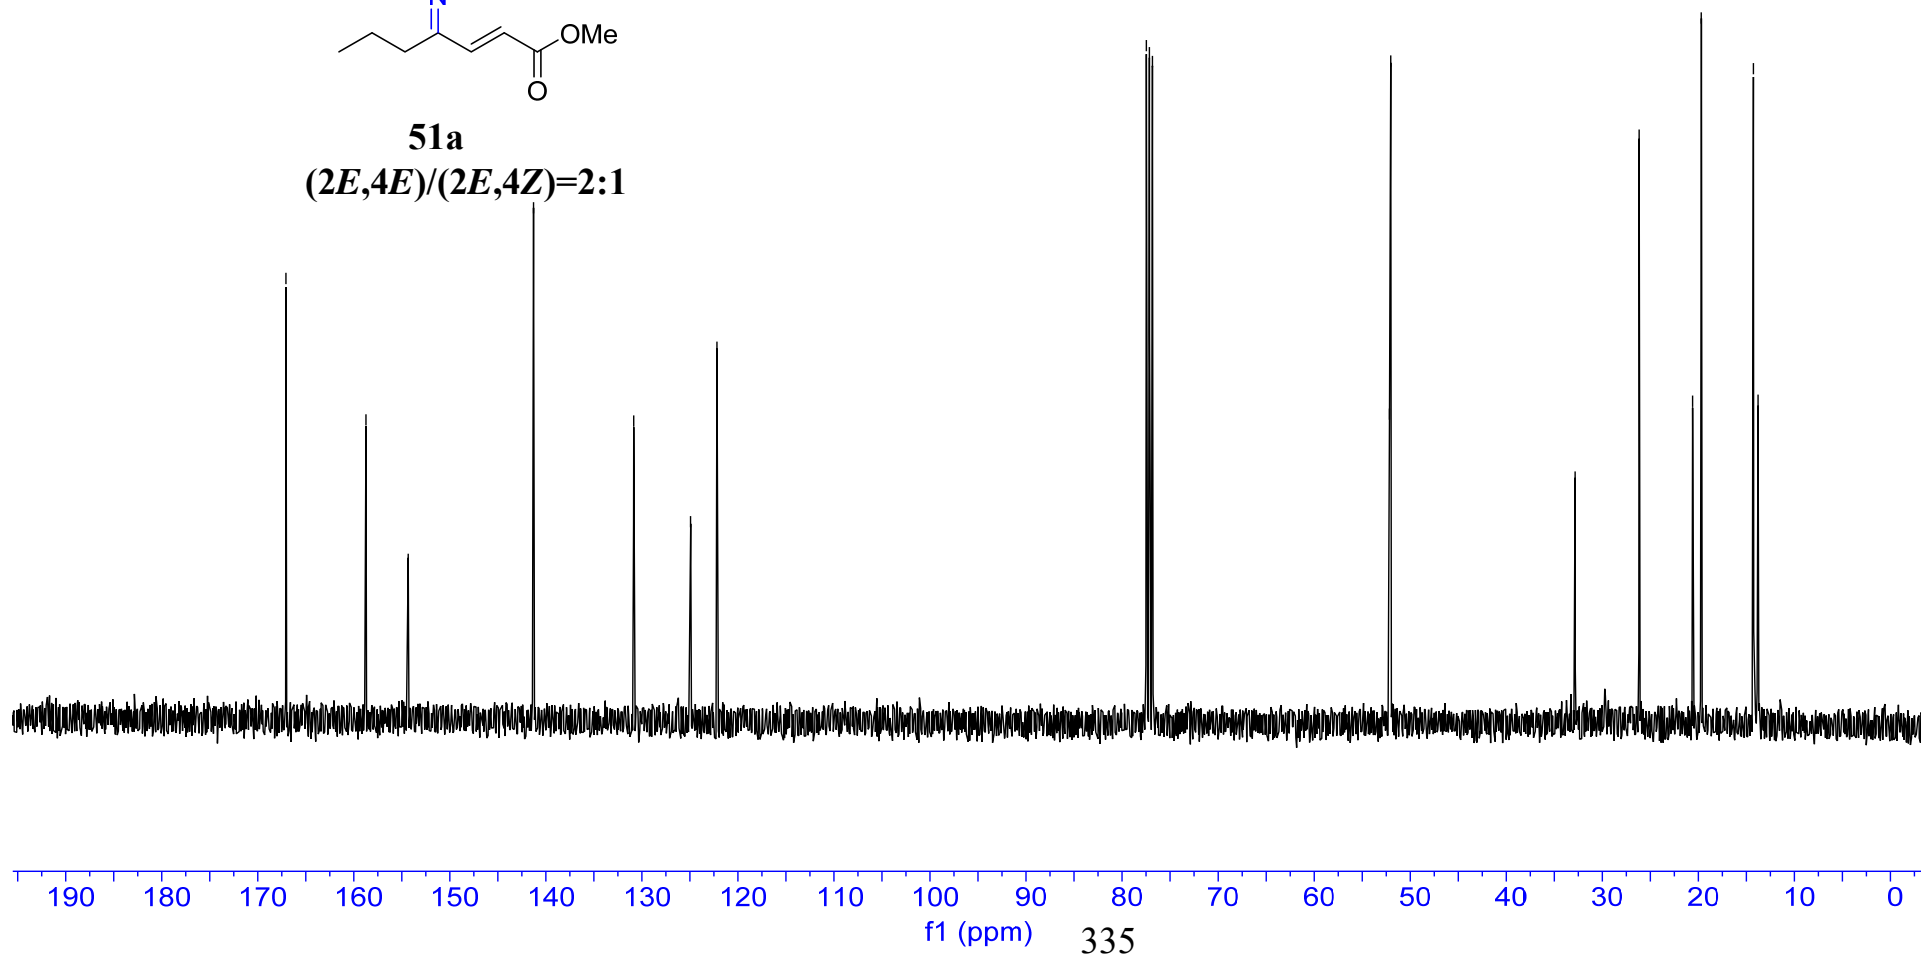

<sup>1</sup>H NMR, 400 MHz, CDCl<sub>3</sub>

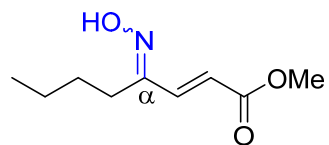

**52a (α-product)**  
(2*E*,4*E*)/(2*E*,4*Z*)=2:1

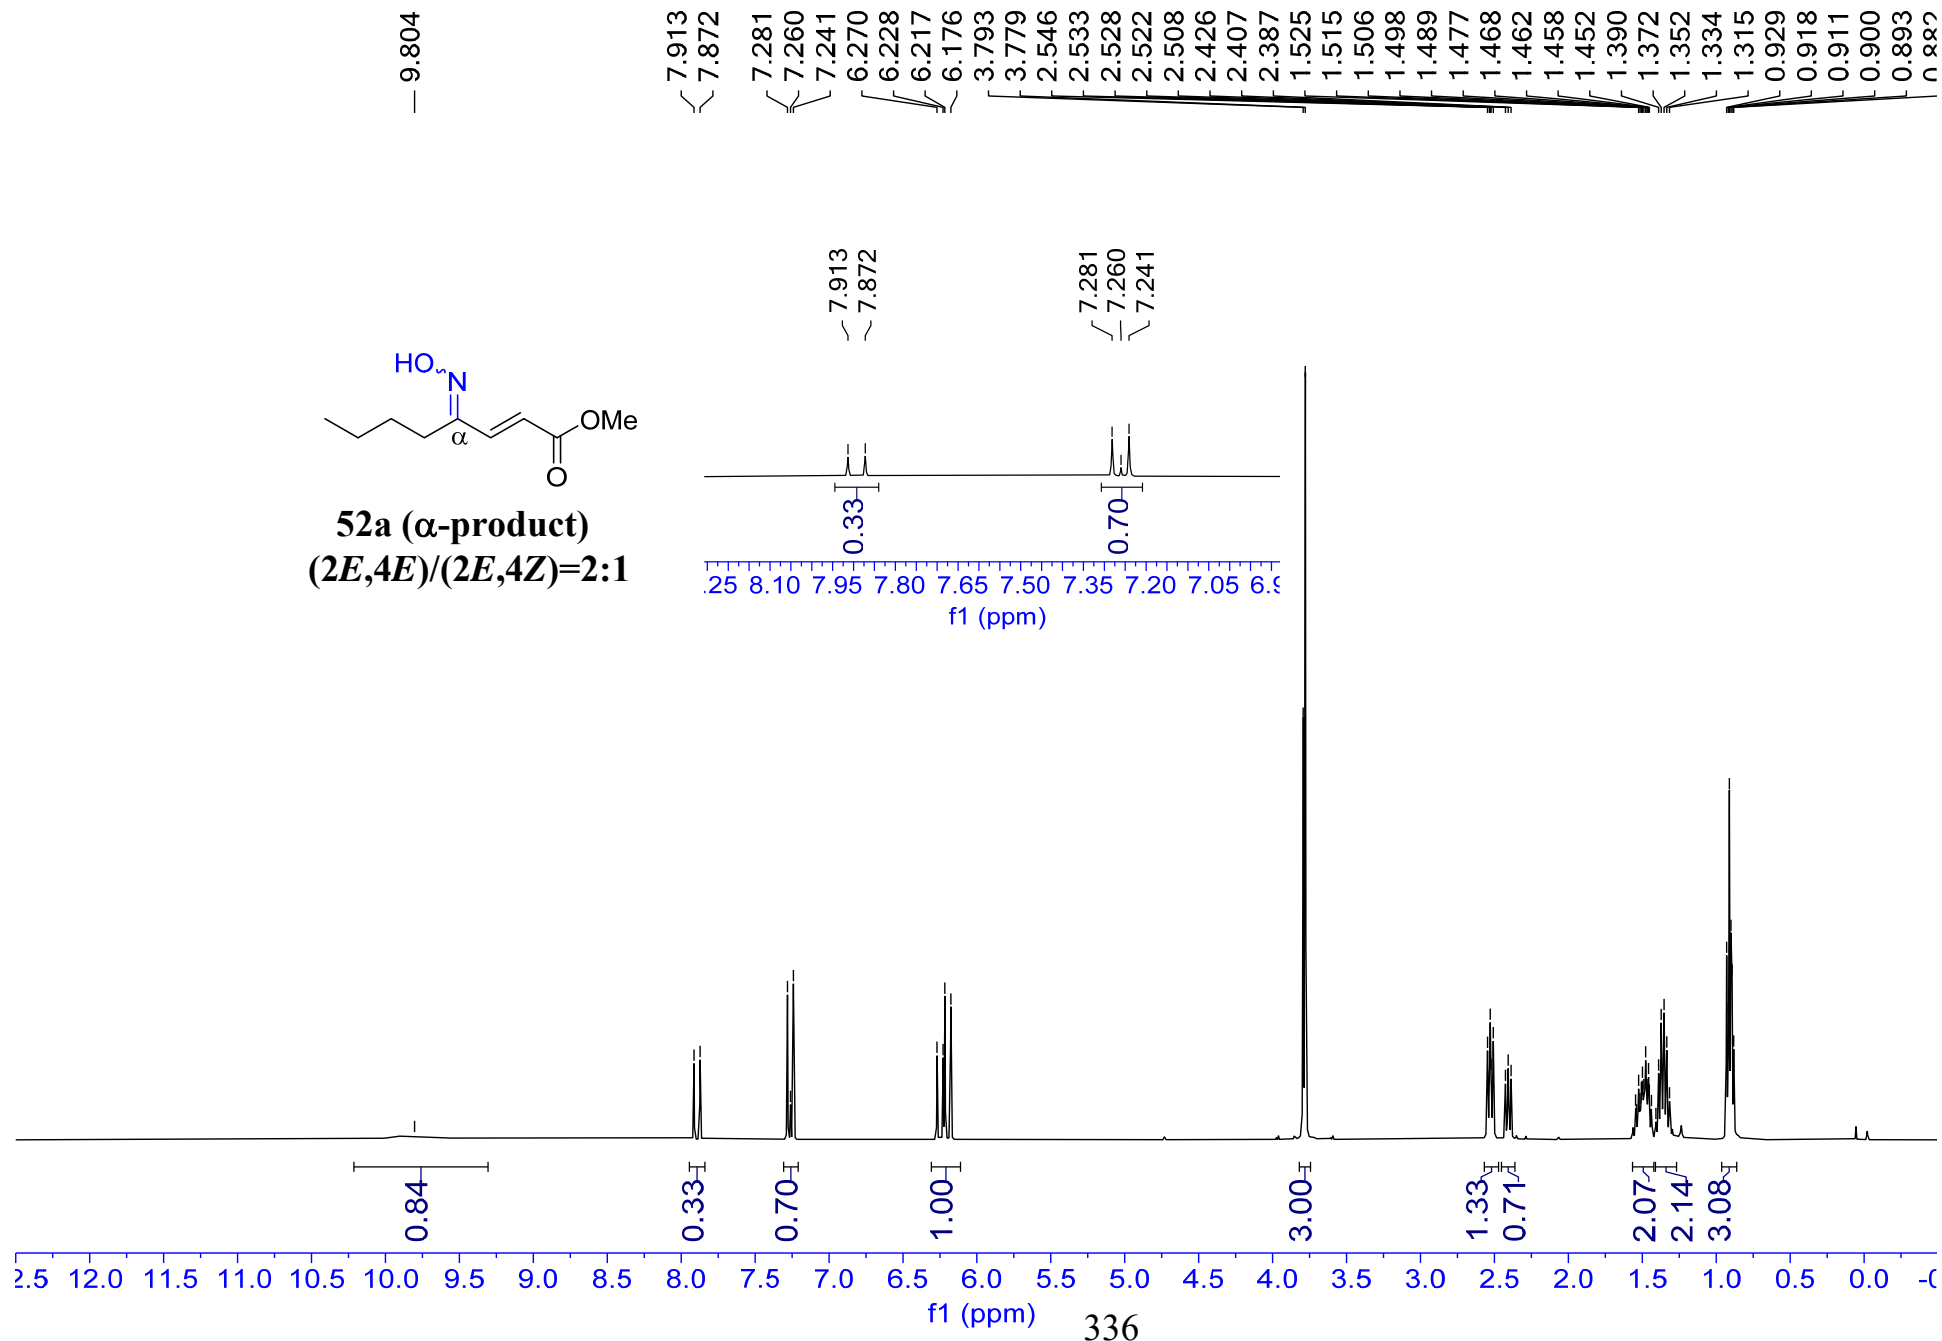

<sup>13</sup>C NMR 101 MHz, CDCl<sub>3</sub>

— 167.04

— 159.06

— 154.68

— 141.25

~ 130.86

~ 125.03

~ 122.30

77.48

77.16

76.84

52.19

52.05

30.71

29.38

28.40

24.14

23.01

22.47

13.88

13.81

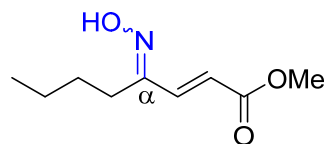

**52a (α-product)**  
**(2*E*,4*E*)/(2*E*,4*Z*)=2:1**

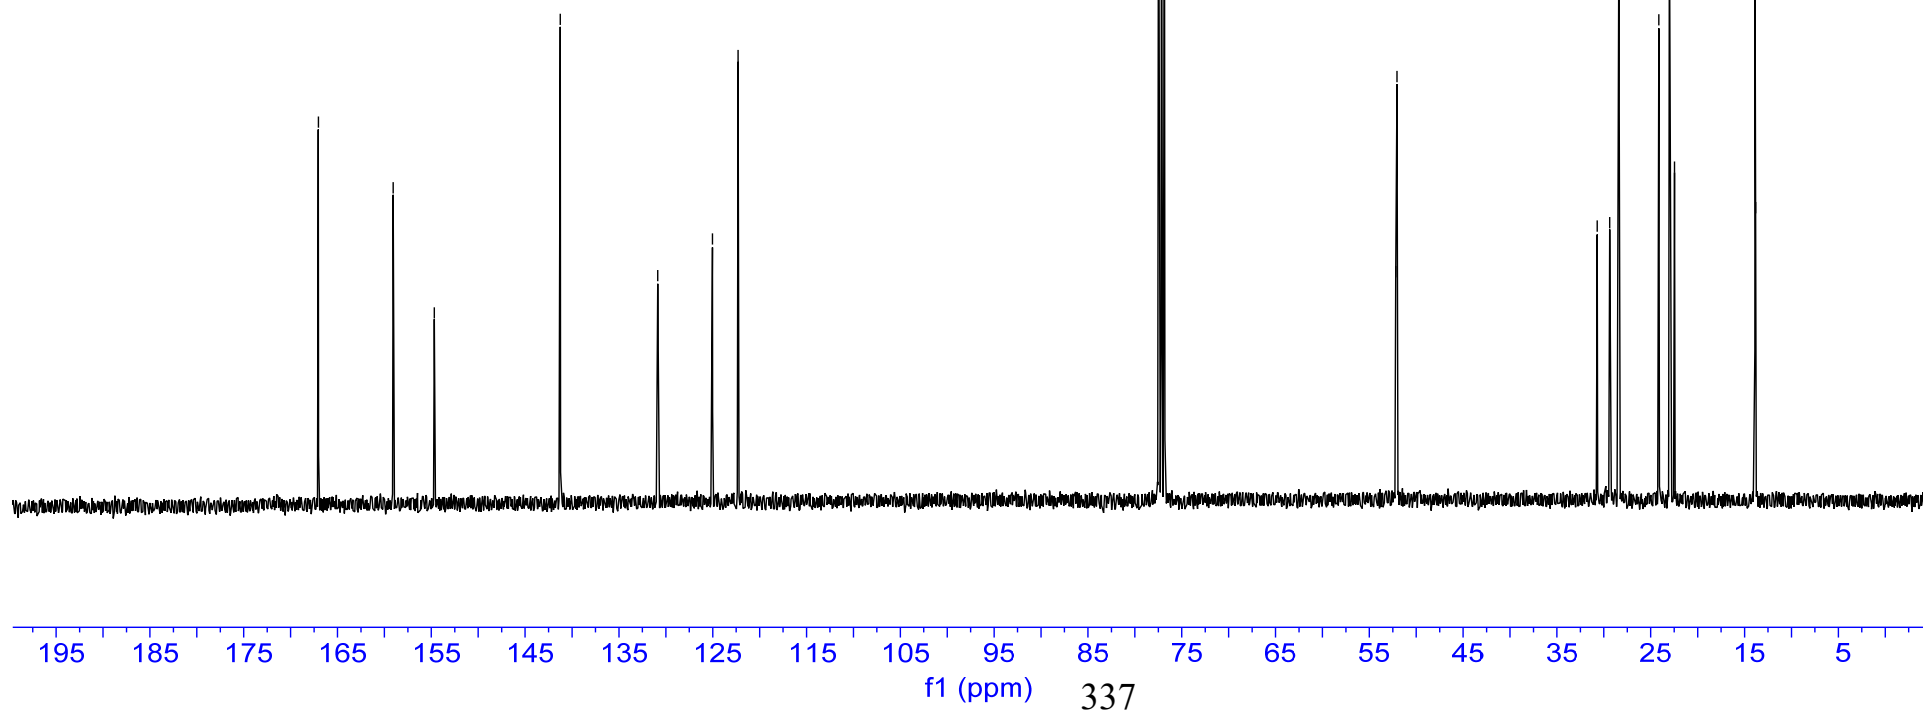

<sup>1</sup>H NMR, 400 MHz, CDCl<sub>3</sub>

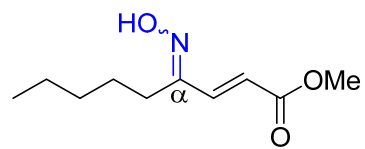

**53a (α-product)**  
(2*E*,4*E*)/(2*E*,4*Z*)=2:1

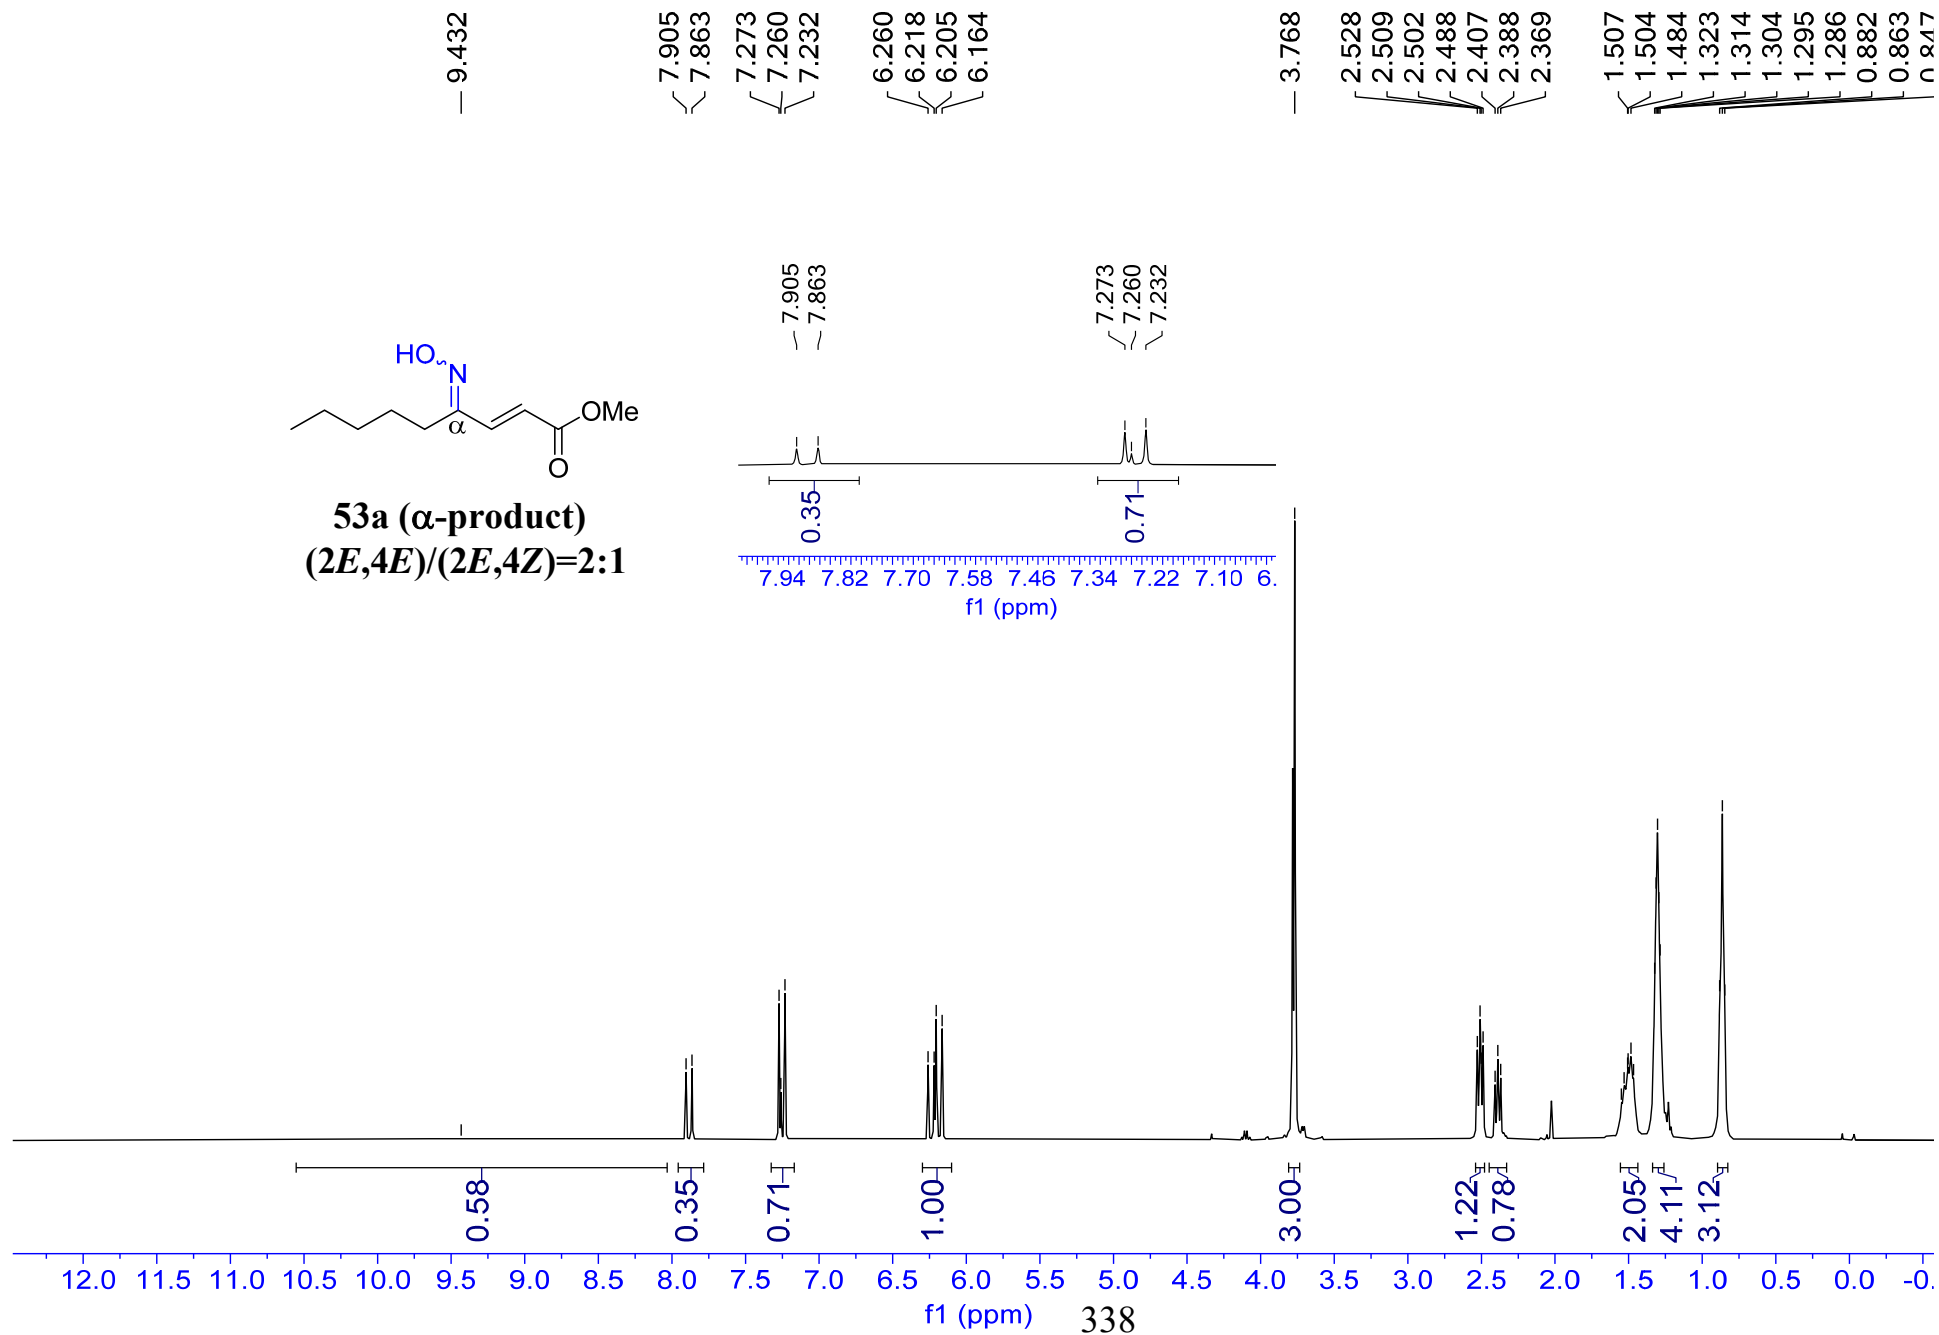

<sup>13</sup>C NMR 101 MHz, CDCl<sub>3</sub>

— 167.04  
— 159.01  
— 154.65  
  
— 141.25  
  
— 130.89  
— 124.99  
— 122.24  
  
  
77.48  
77.16  
76.84  
  
52.15  
52.01  
  
31.99  
31.50  
30.94  
27.00  
25.94  
24.33  
22.45  
22.40  
— 13.97

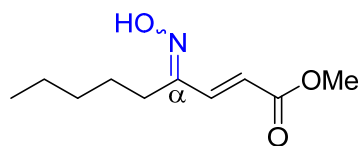

**53a (α-product)**  
**(2*E*,4*E*)/(2*E*,4*Z*)=2:1**

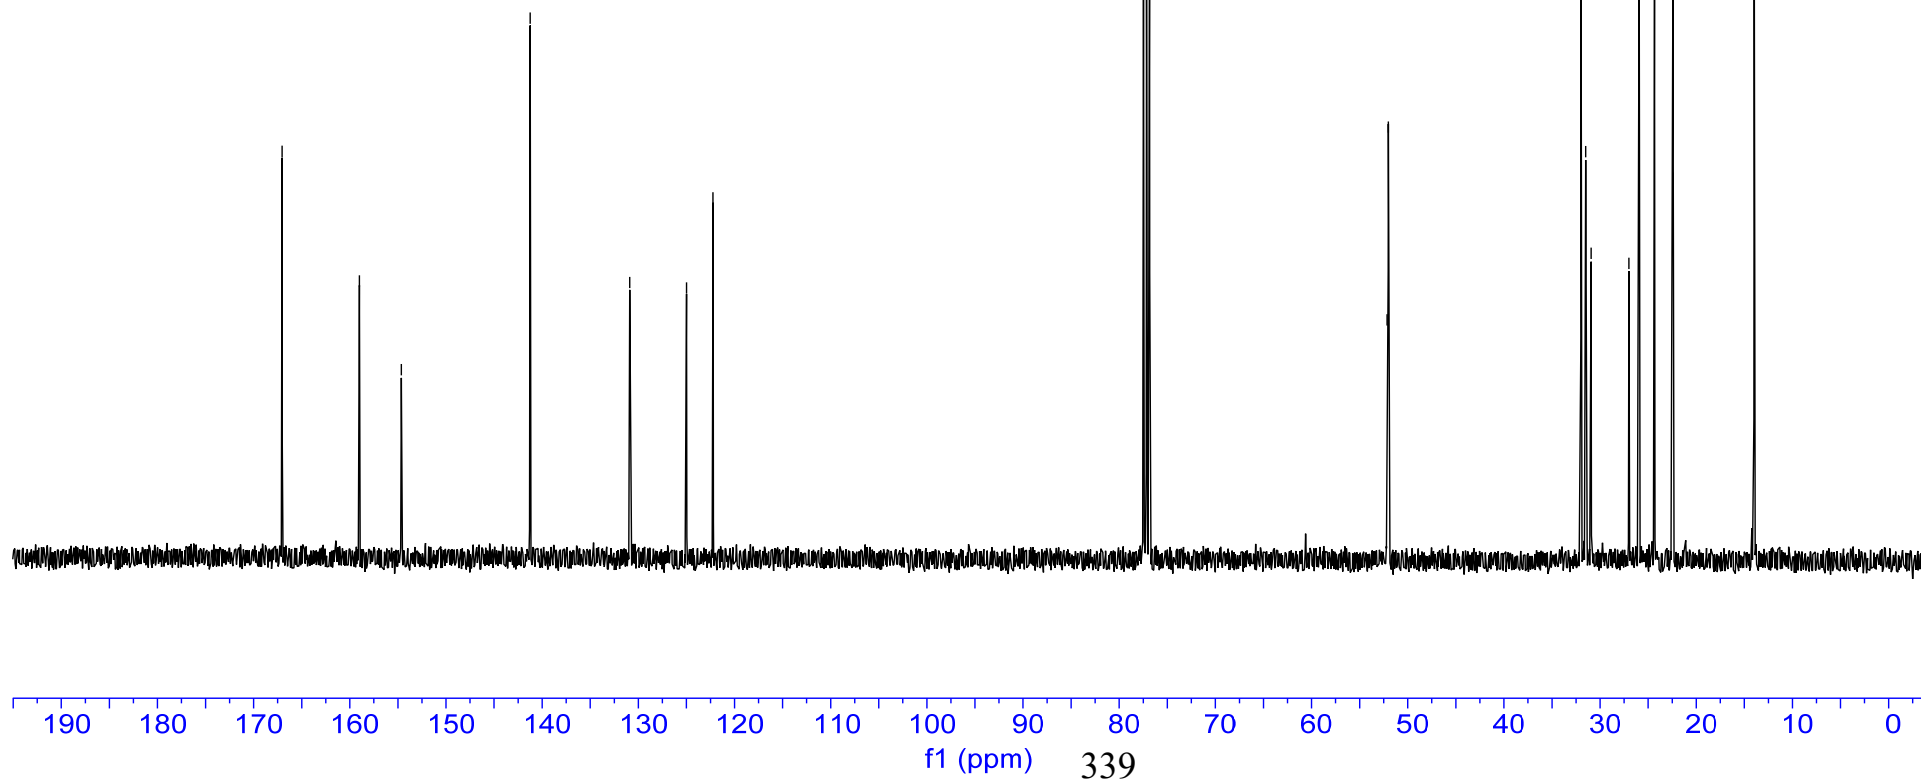

<sup>1</sup>H NMR, 400 MHz, CDCl<sub>3</sub>

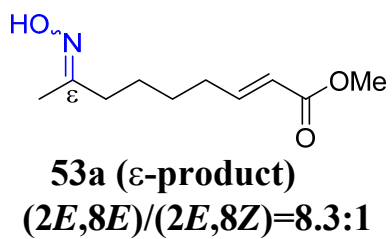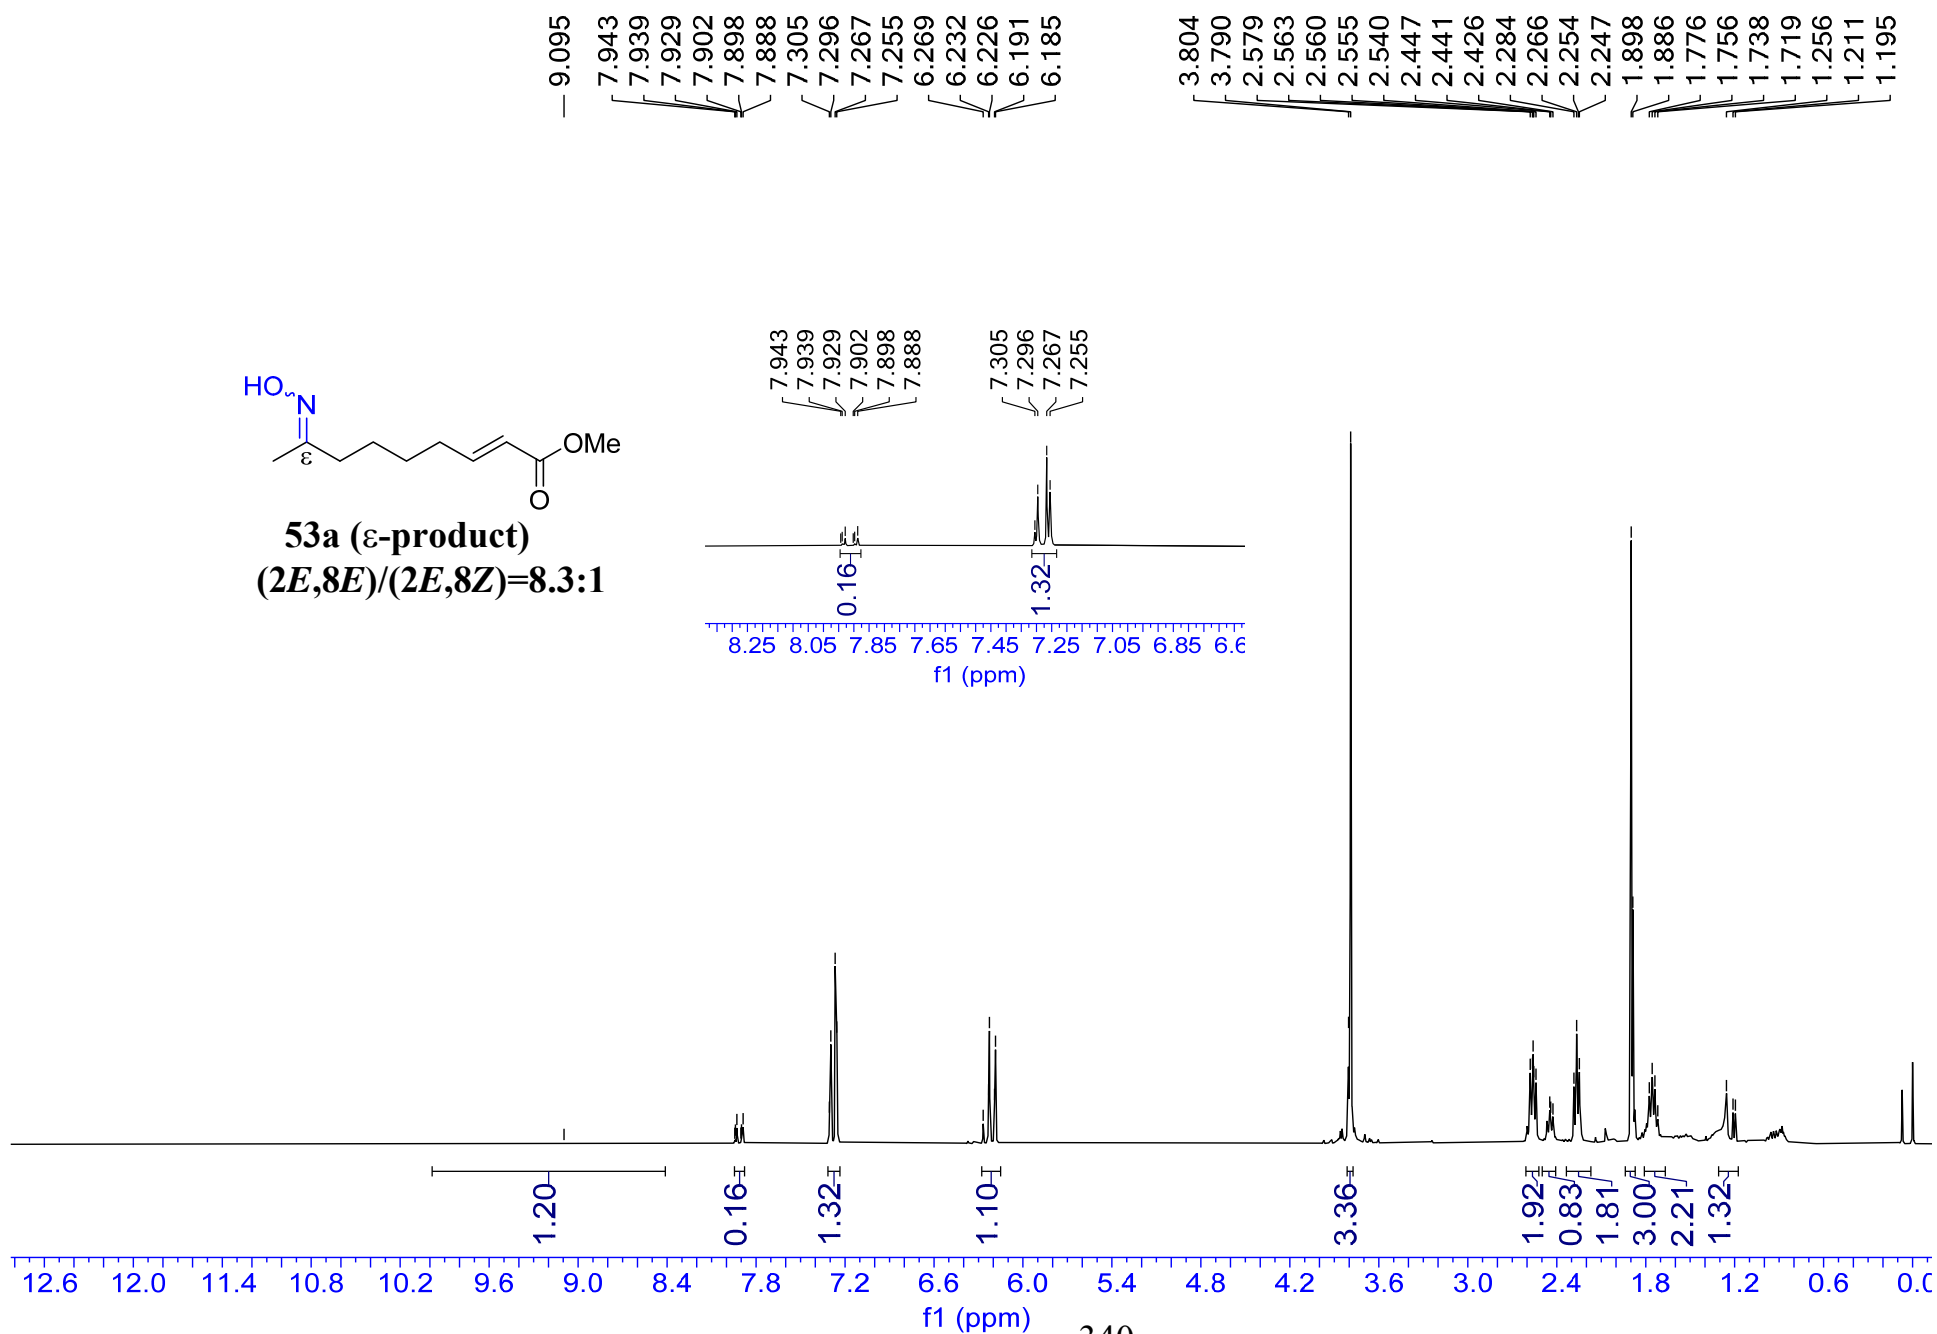



<sup>13</sup>C NMR 101 MHz, CDCl<sub>3</sub>

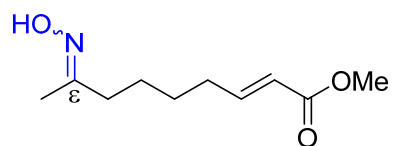

**53a (ε-product)**  
**(2*E*,8*E*)/(2*E*,8*Z*)=8.3:1**

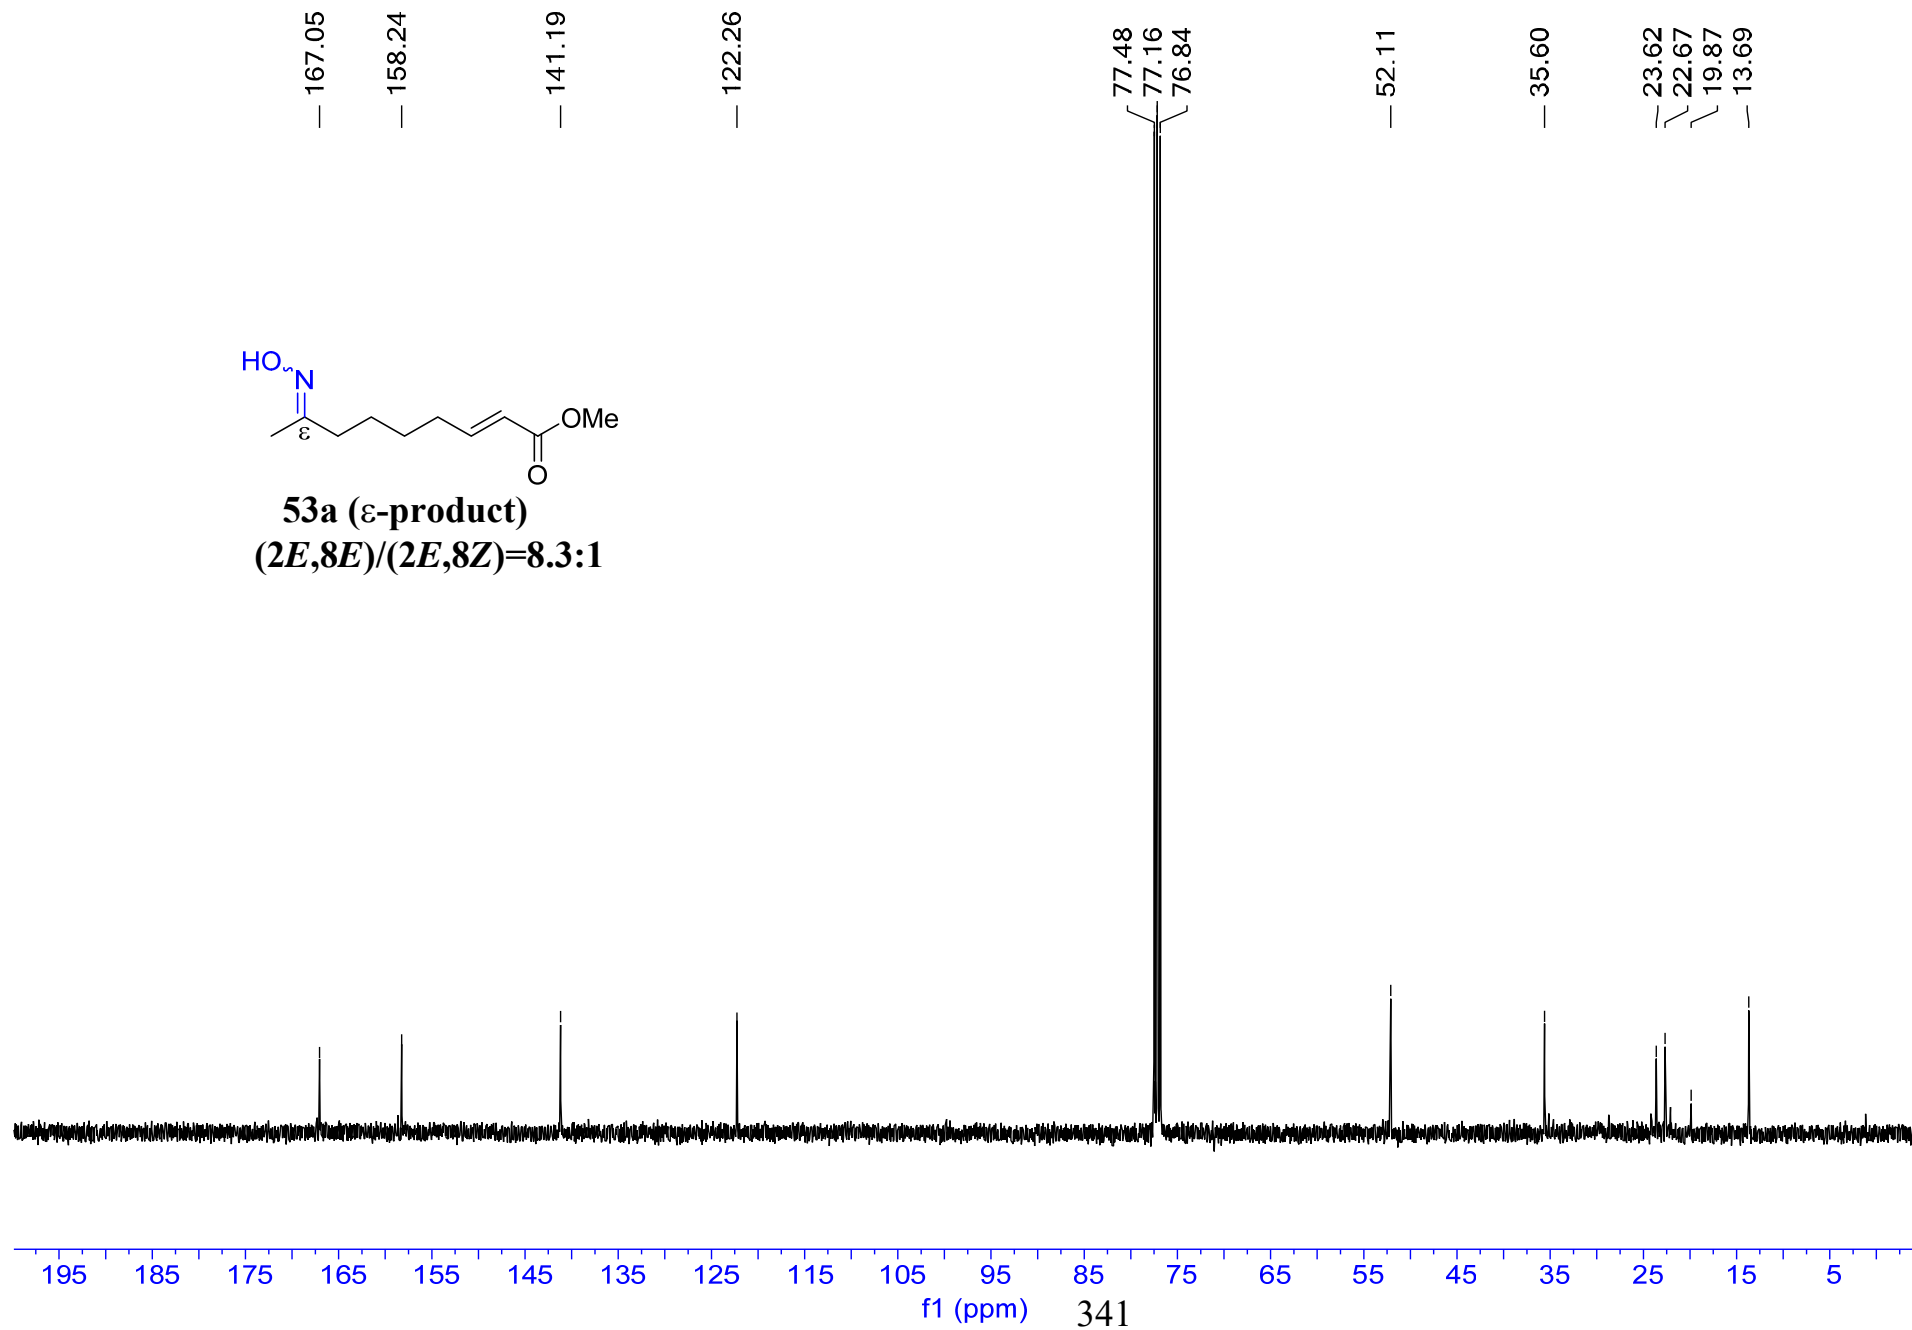

<sup>1</sup>H NMR, 400 MHz, CDCl<sub>3</sub>

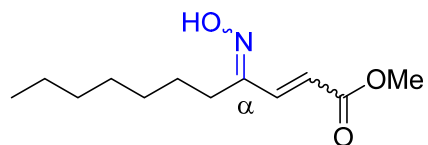

**54a**

$$2E/2Z = [(2E,4E) + (2E,4Z)] / [(2Z,4E) + (2Z,4Z)] = 3:1$$

$$4E/4Z = [(2E,4E) + (2Z,4E)] / [(2E,4Z) + (2Z,4Z)] = 2:1$$

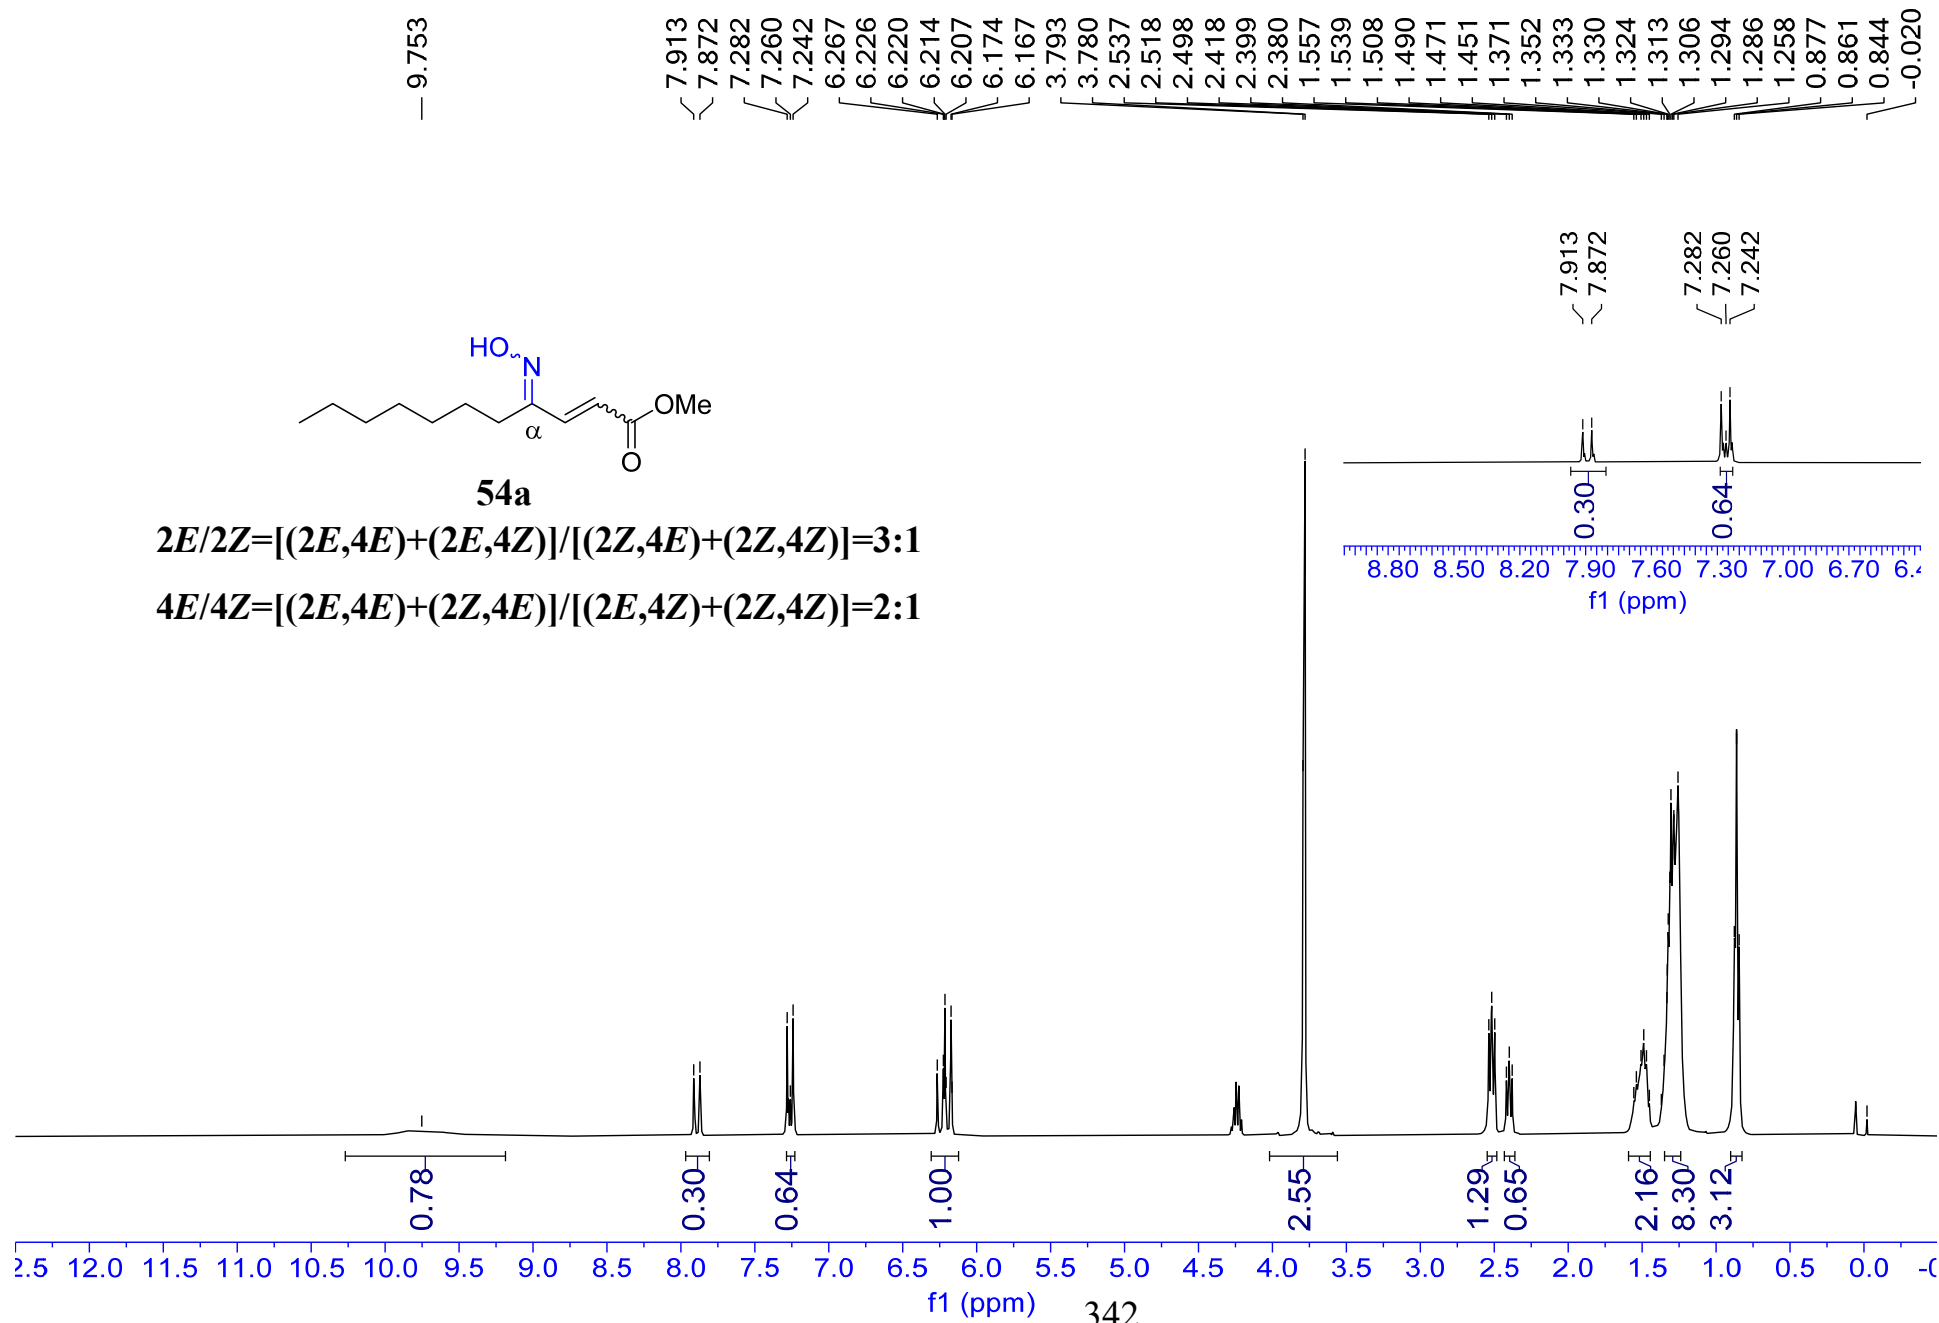

<sup>13</sup>C NMR 101 MHz, CDCl<sub>3</sub>

167.03  
166.60  
159.14  
159.08  
154.78  
154.70

141.29  
140.99  
130.88  
130.61  
125.52  
125.02  
122.77  
122.28

77.48  
77.16  
76.84

61.17  
60.98  
52.17  
52.03  
31.83  
31.03  
29.88  
29.36  
29.11  
29.05  
27.31  
26.33  
24.42  
22.71  
14.31  
14.15

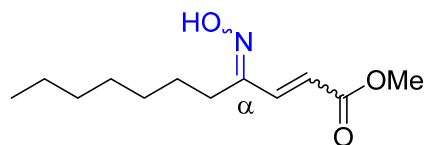

**54a**

$$2E/2Z=[(2E,4E)+(2E,4Z)]/[(2Z,4E)+(2Z,4Z)]=3:1$$

$$4E/4Z=[(2E,4E)+(2Z,4E)]/[(2E,4Z)+(2Z,4Z)]=2:1$$

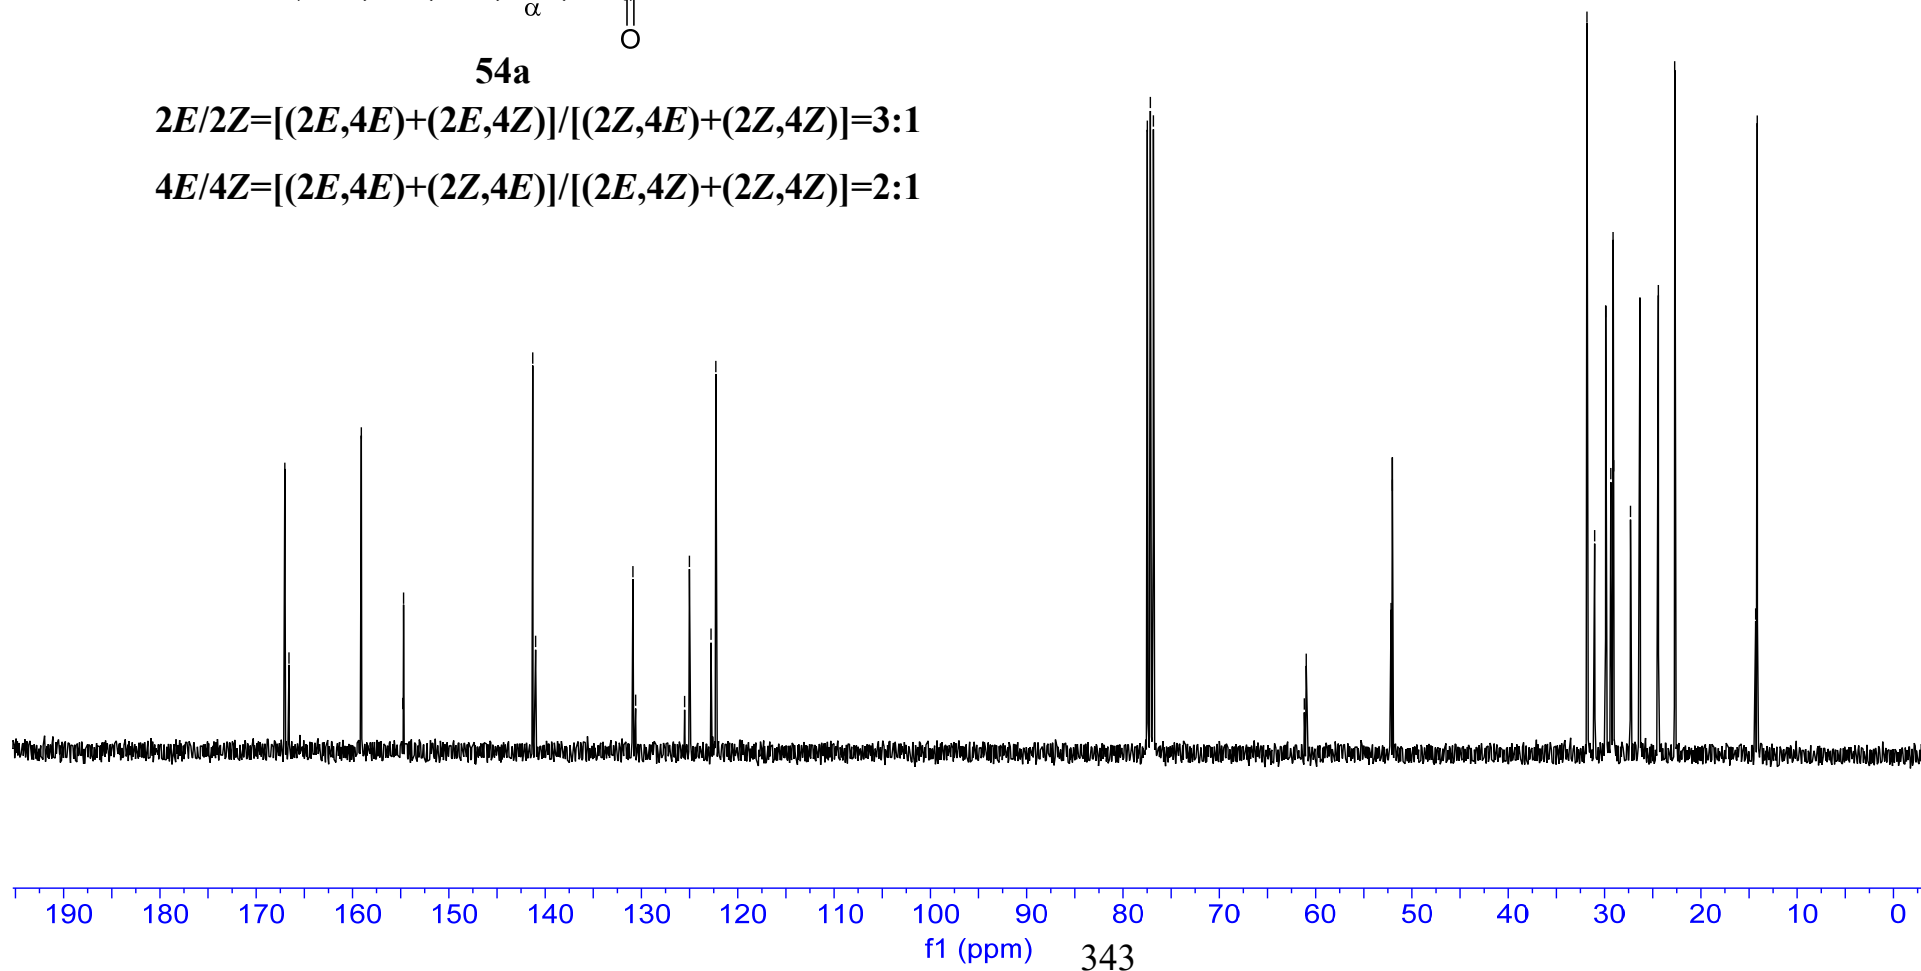

<sup>1</sup>H NMR, 400 MHz, CDCl<sub>3</sub>

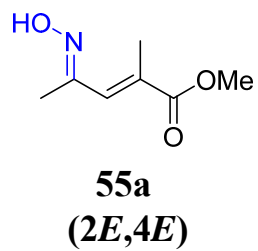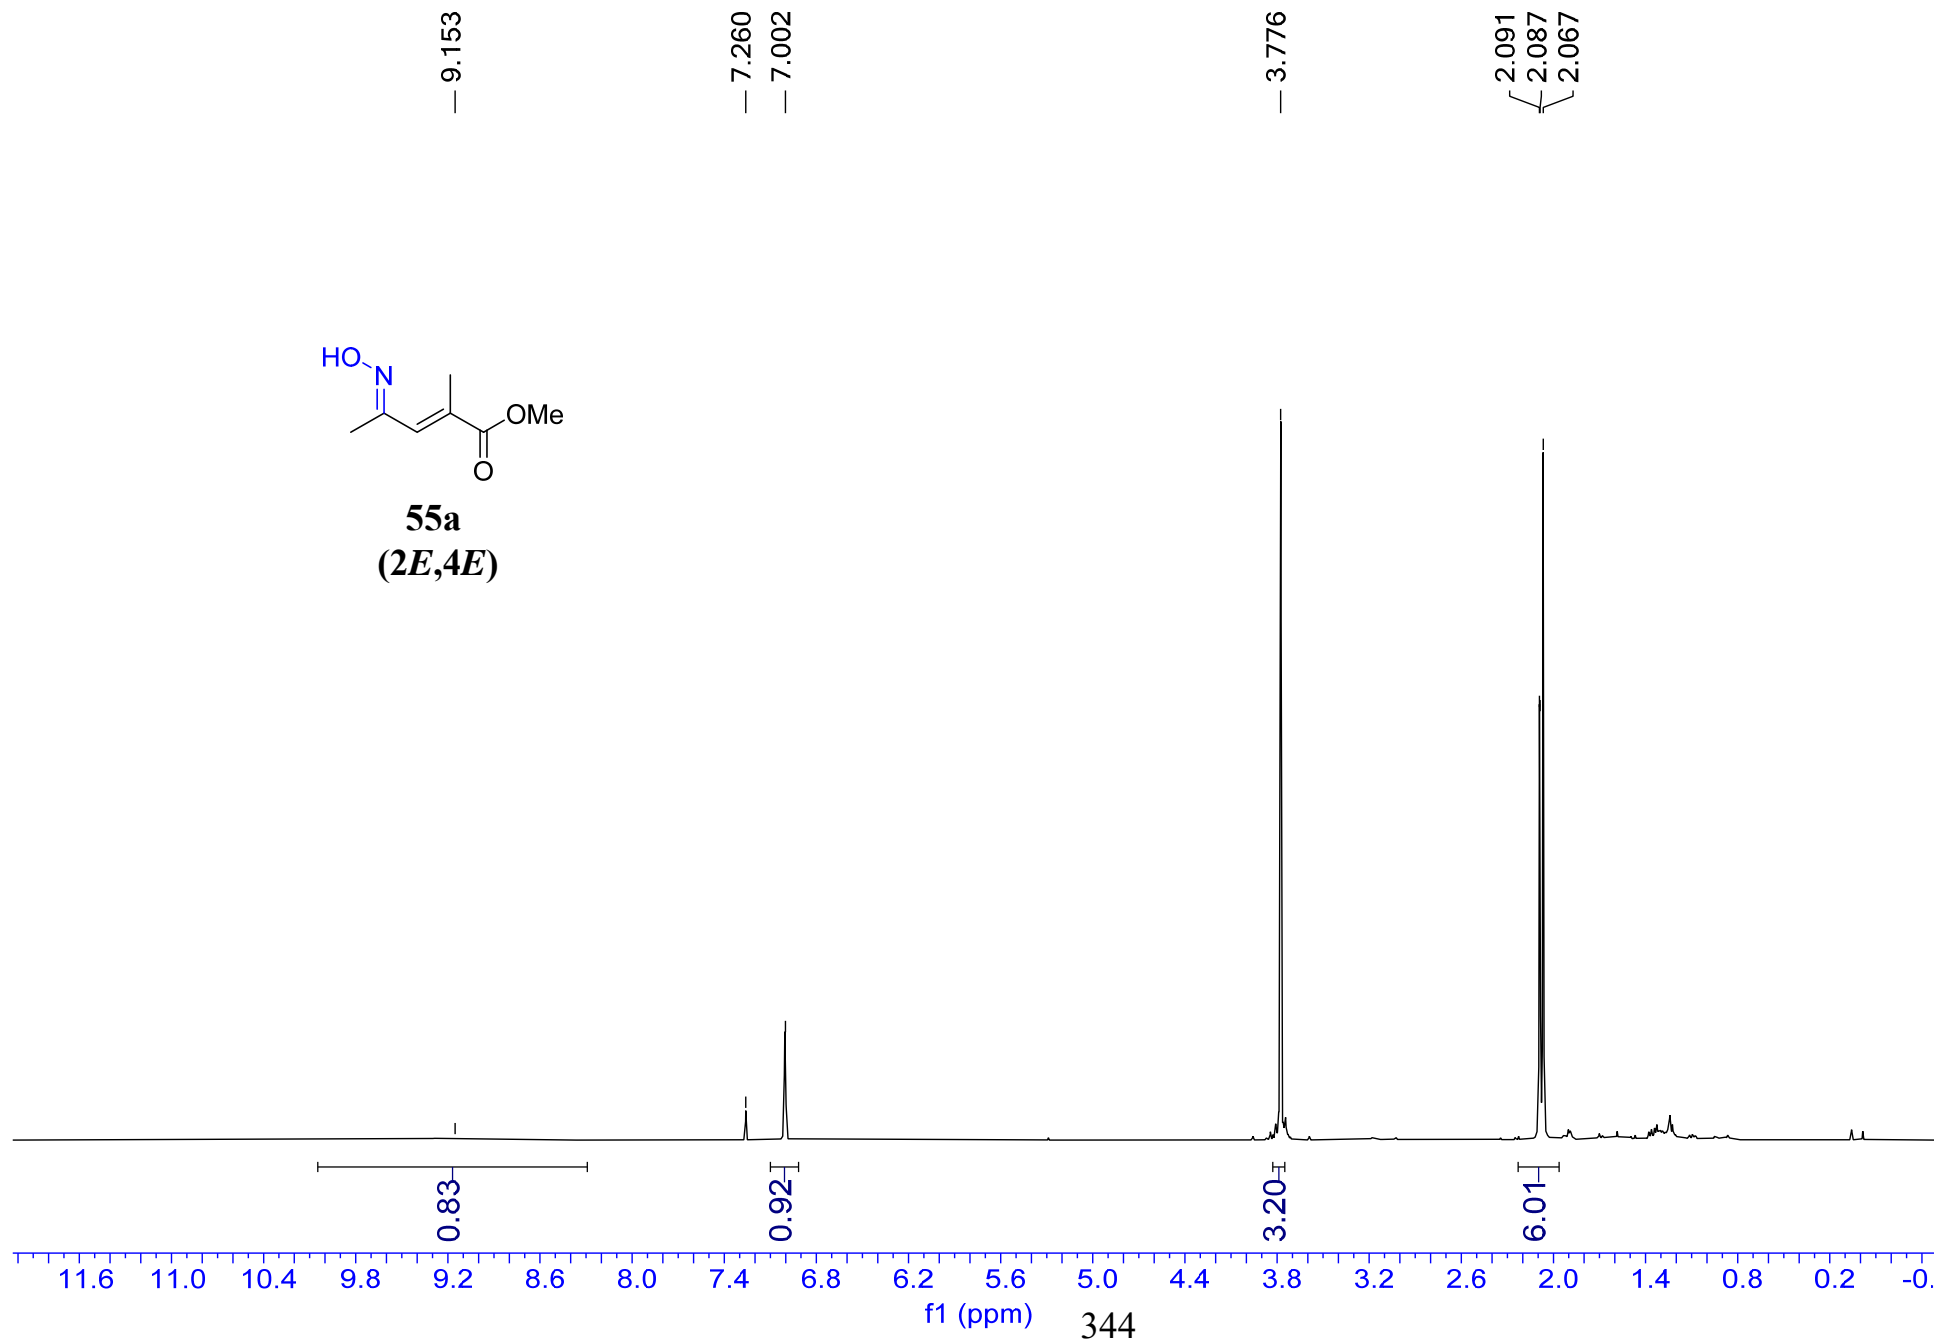

<sup>13</sup>C NMR 101 MHz, CDCl<sub>3</sub>

— 168.74

— 154.83

~ 134.17

~ 132.04

{ 77.48  
77.16  
76.84 }

— 52.39

{ 14.90  
14.86 }

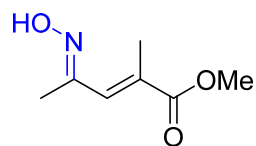

**55a**  
**(2E,4E)**

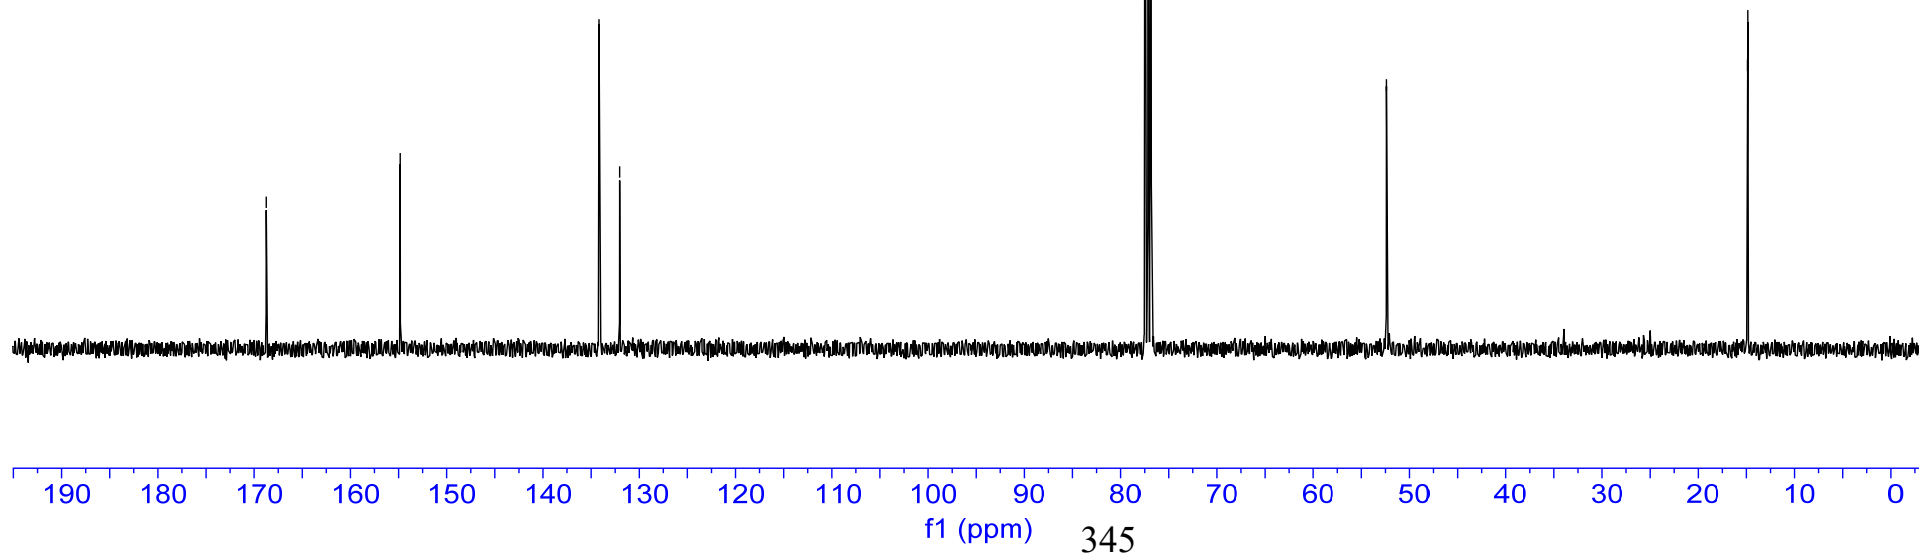

<sup>1</sup>H NMR, 400 MHz, CDCl<sub>3</sub>

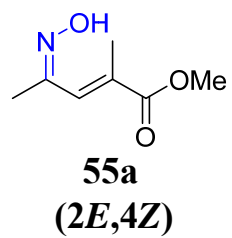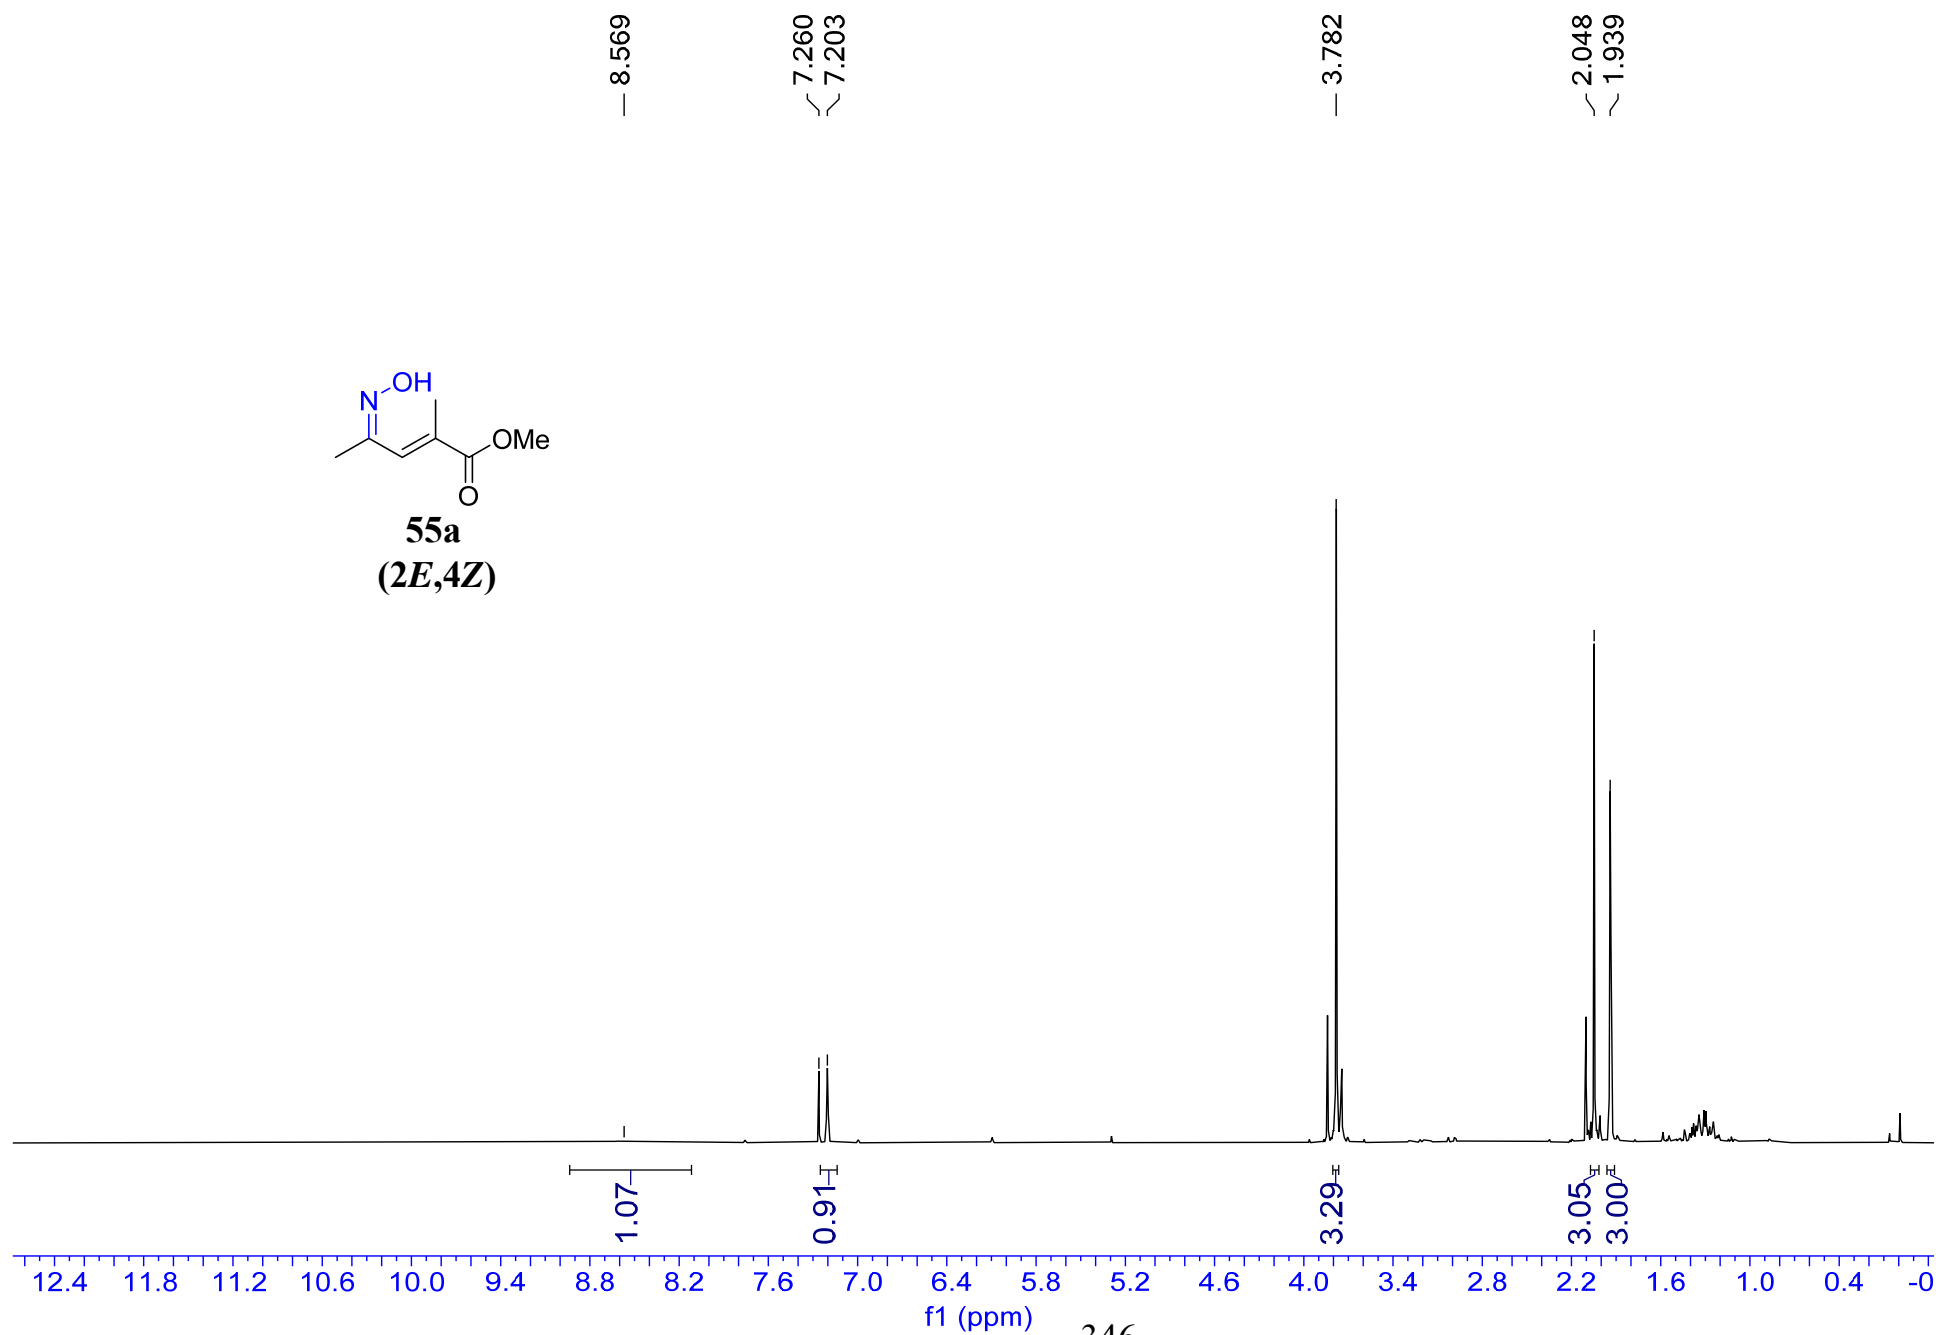

<sup>13</sup>C NMR 101 MHz, CDCl<sub>3</sub>

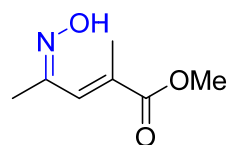

**55a**  
**(2E,4Z)**

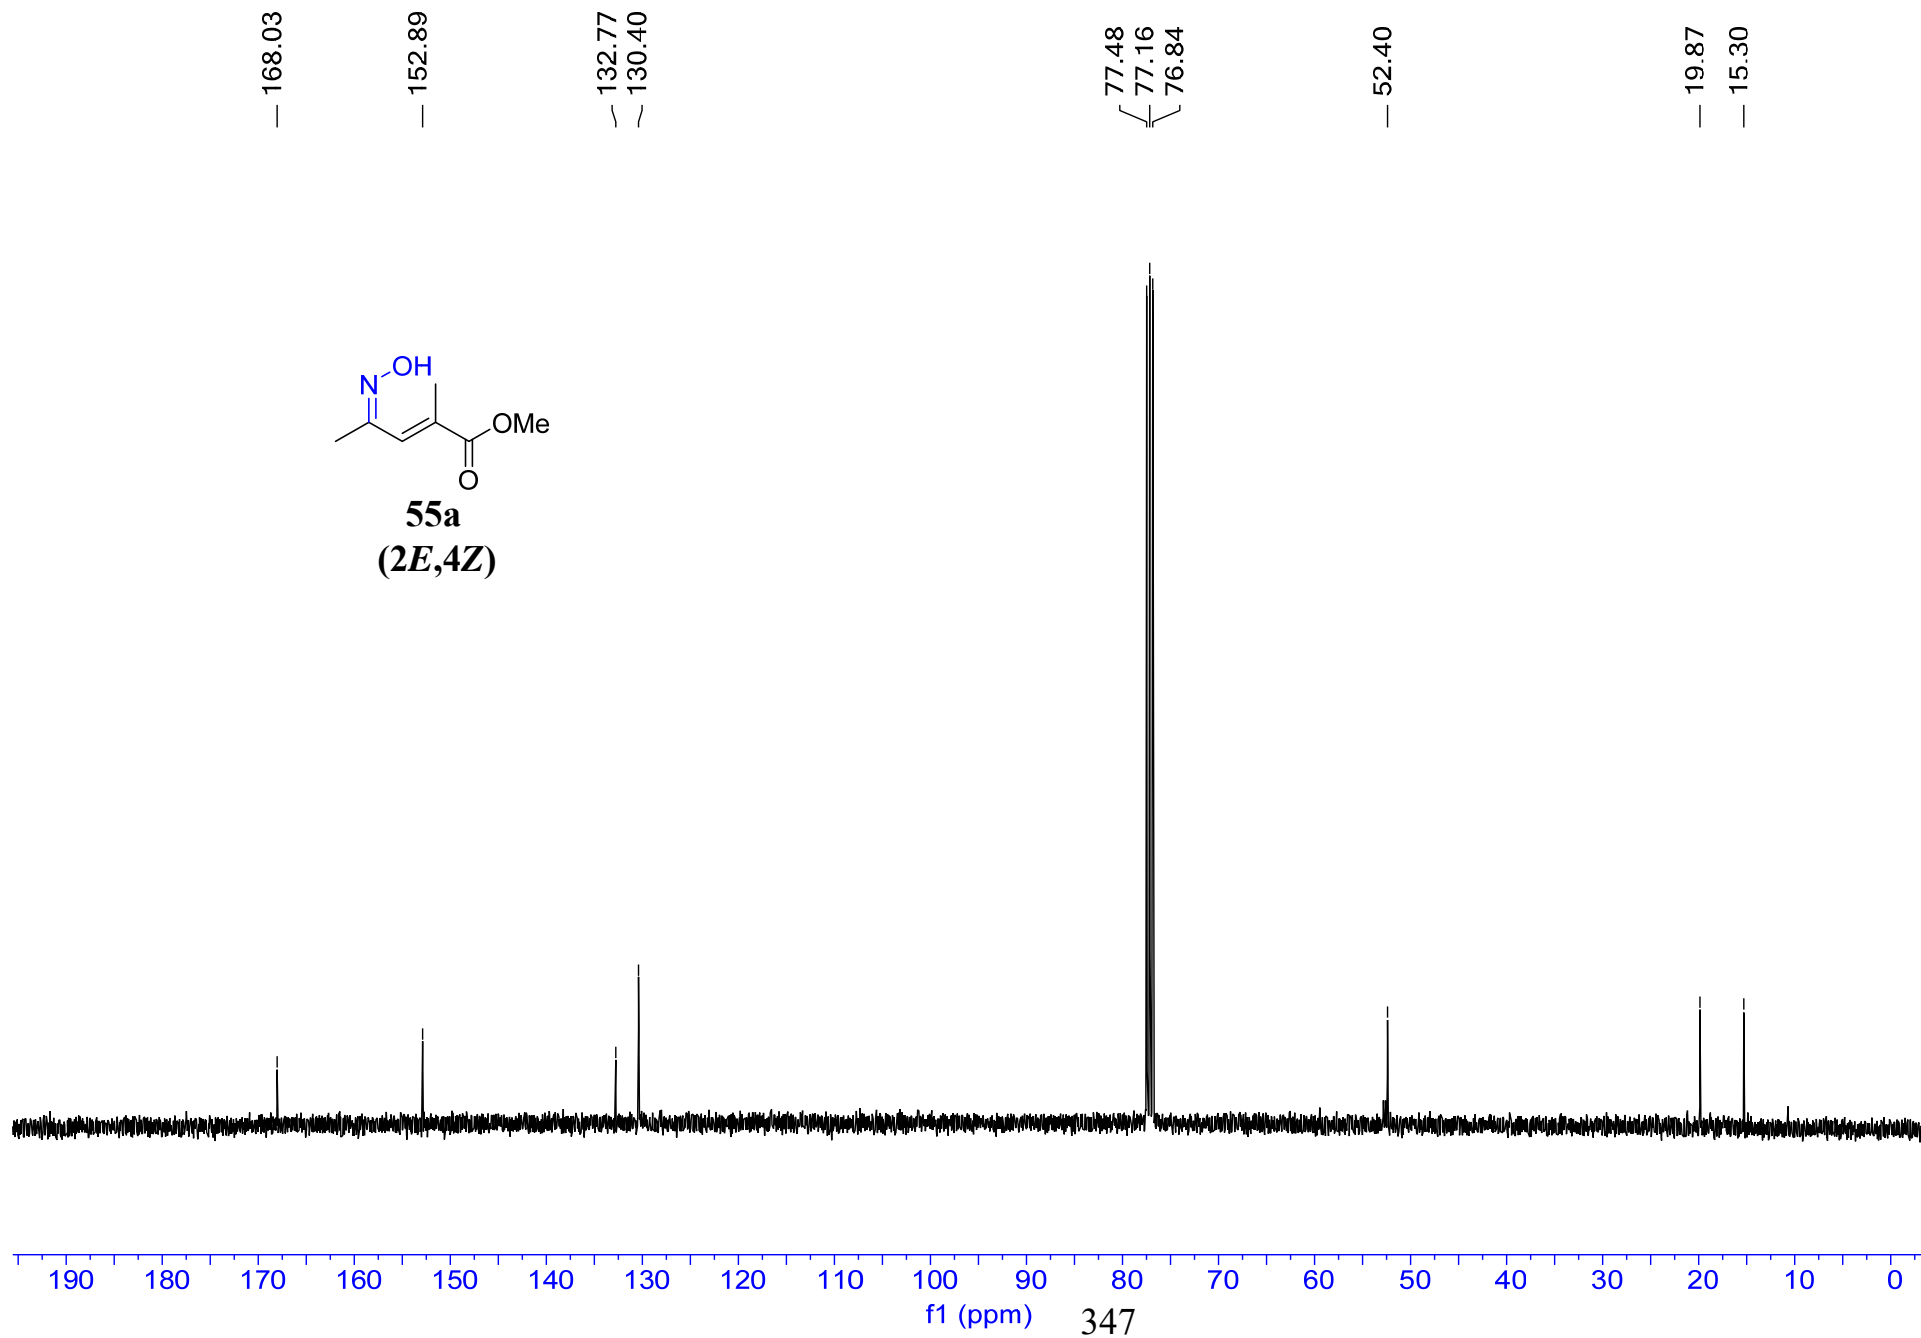

<sup>1</sup>H NMR, 400 MHz, CDCl<sub>3</sub>

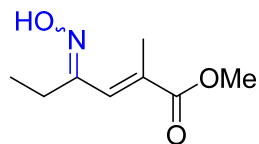

**56a**

(2*E*,4*E*)/(2*E*,4*Z*)=2:1

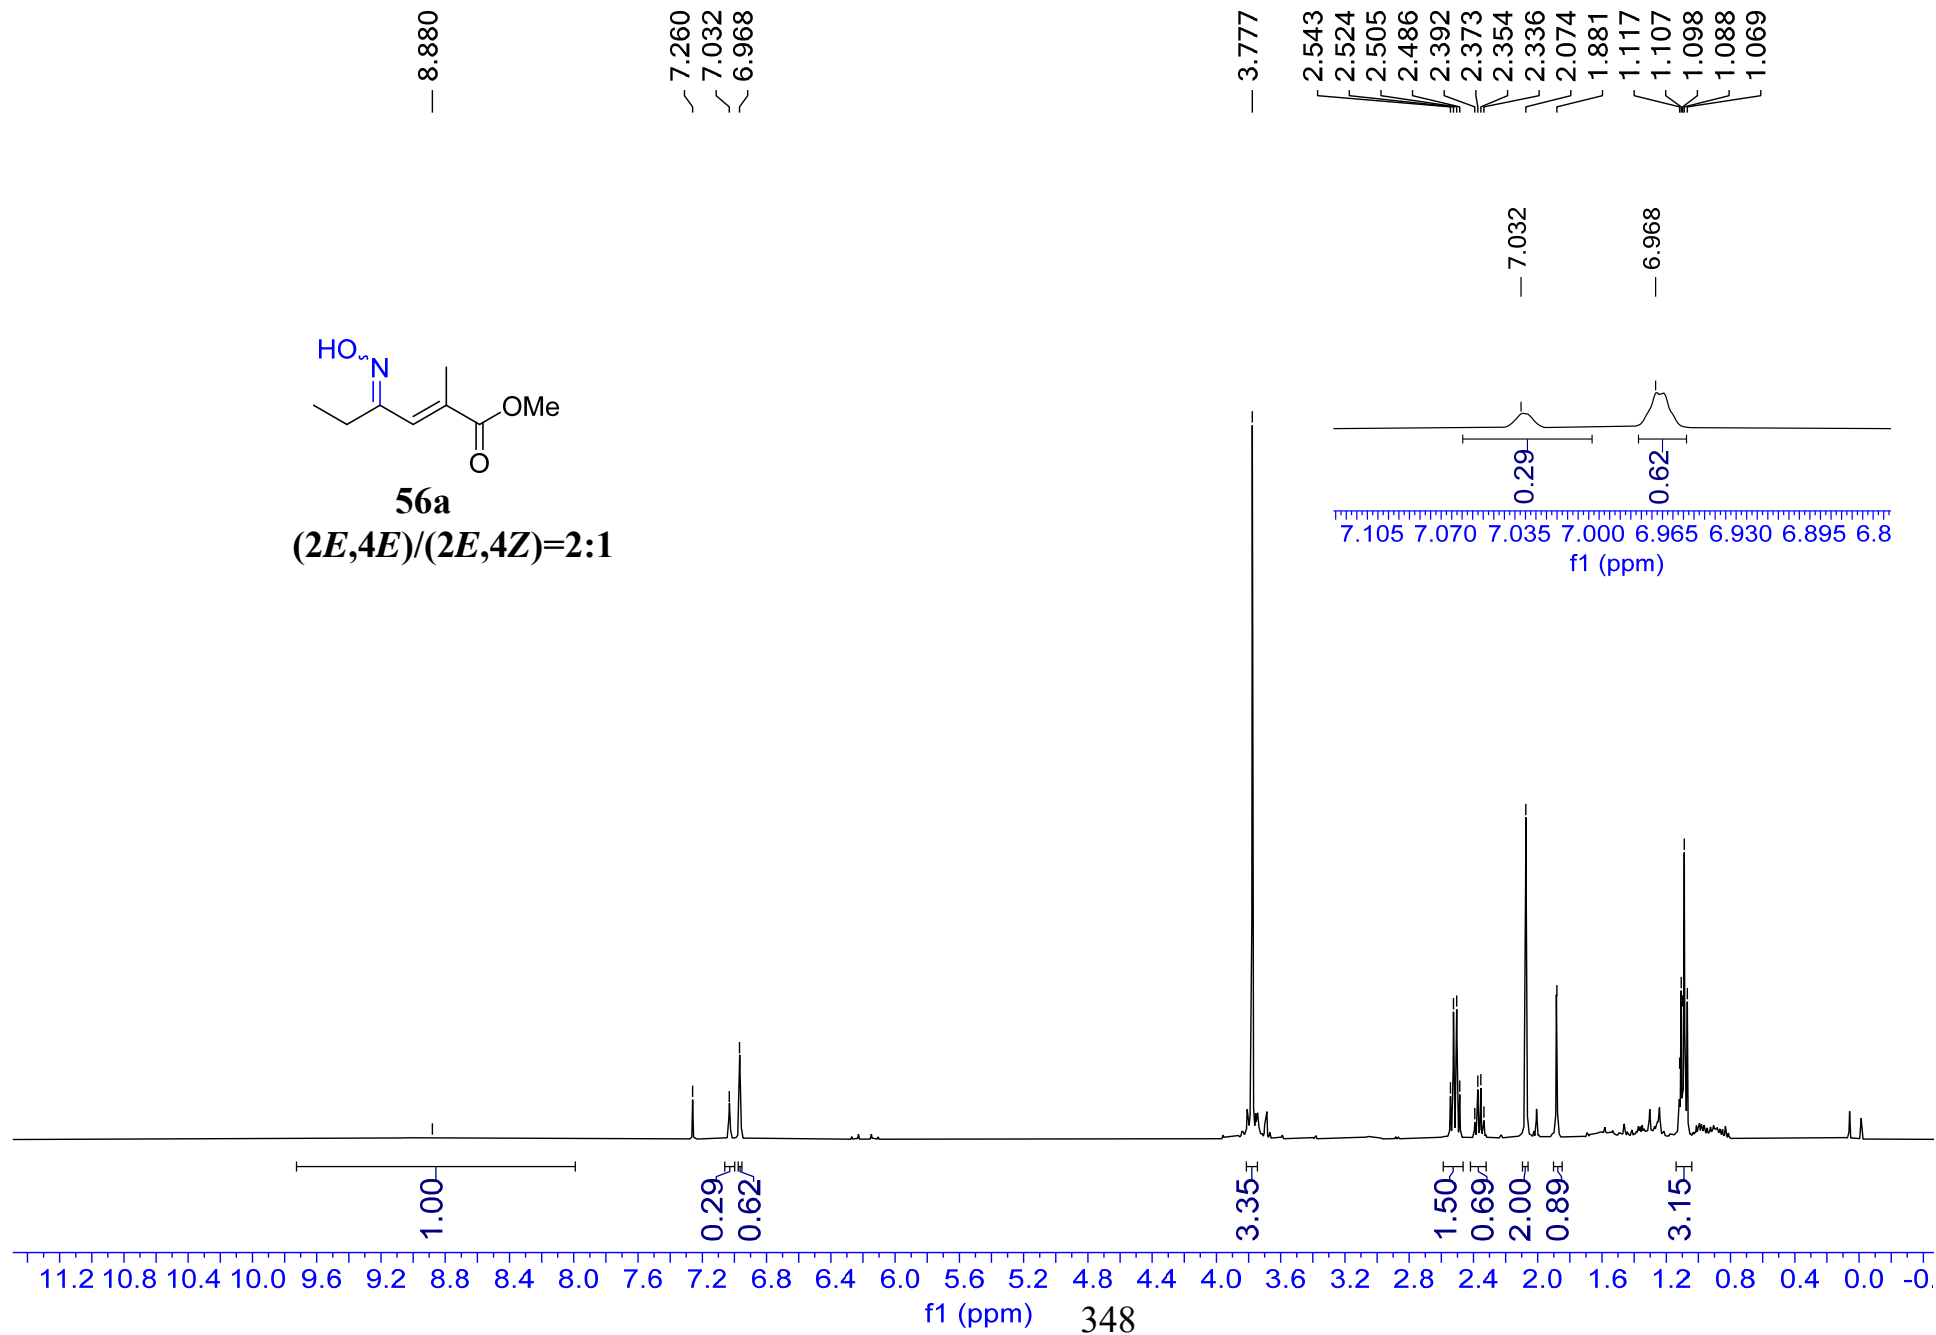



<sup>13</sup>C NMR 101 MHz, CDCl<sub>3</sub>

168.64  
167.79  
159.27  
157.05

133.17  
132.83  
132.66  
130.48

77.48  
77.16  
76.84

52.35  
52.34

27.37  
21.87  
15.50  
14.79  
11.09  
10.25

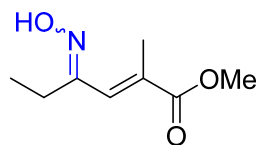

**56a**  
**(2E,4E)/(2E,4Z)=2:1**

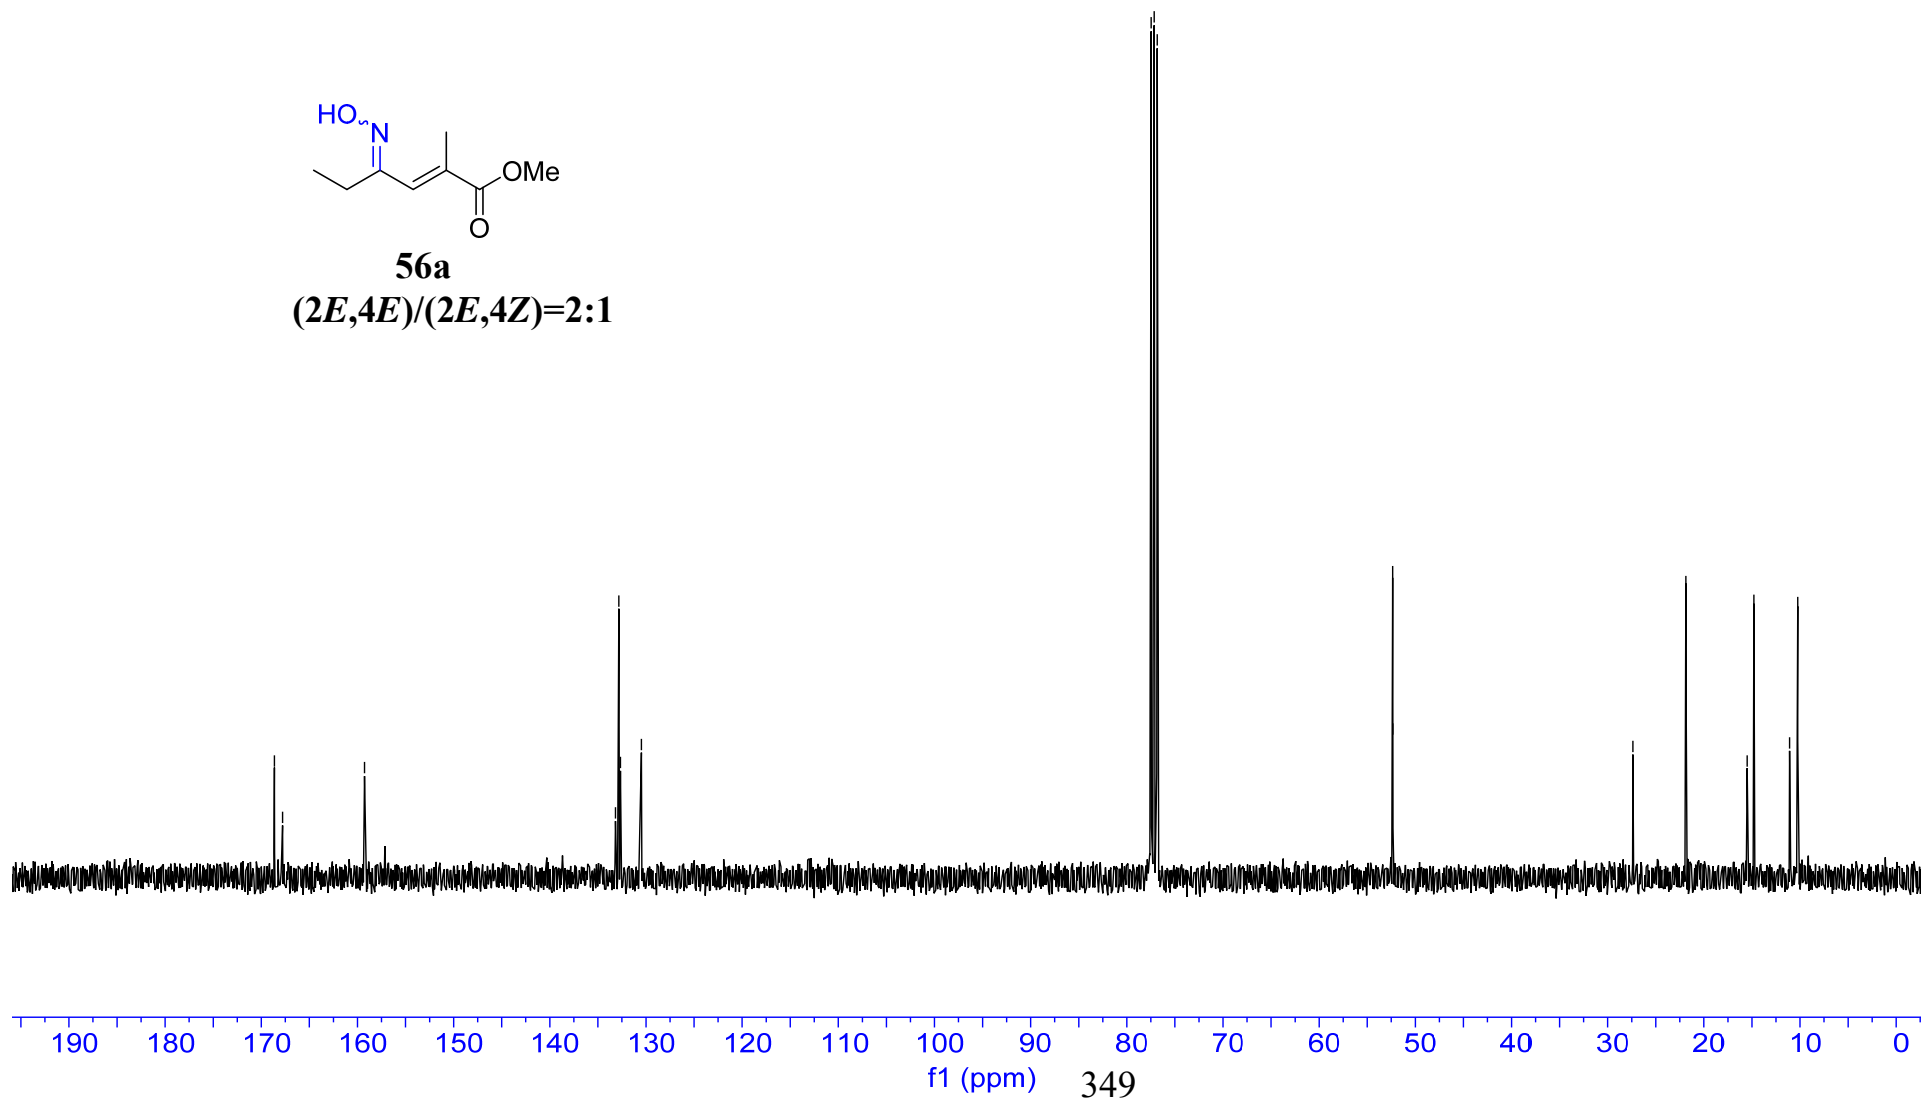

<sup>1</sup>H NMR, 400 MHz, CDCl<sub>3</sub>

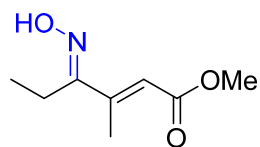

**57a**  
**(2E,4E)**

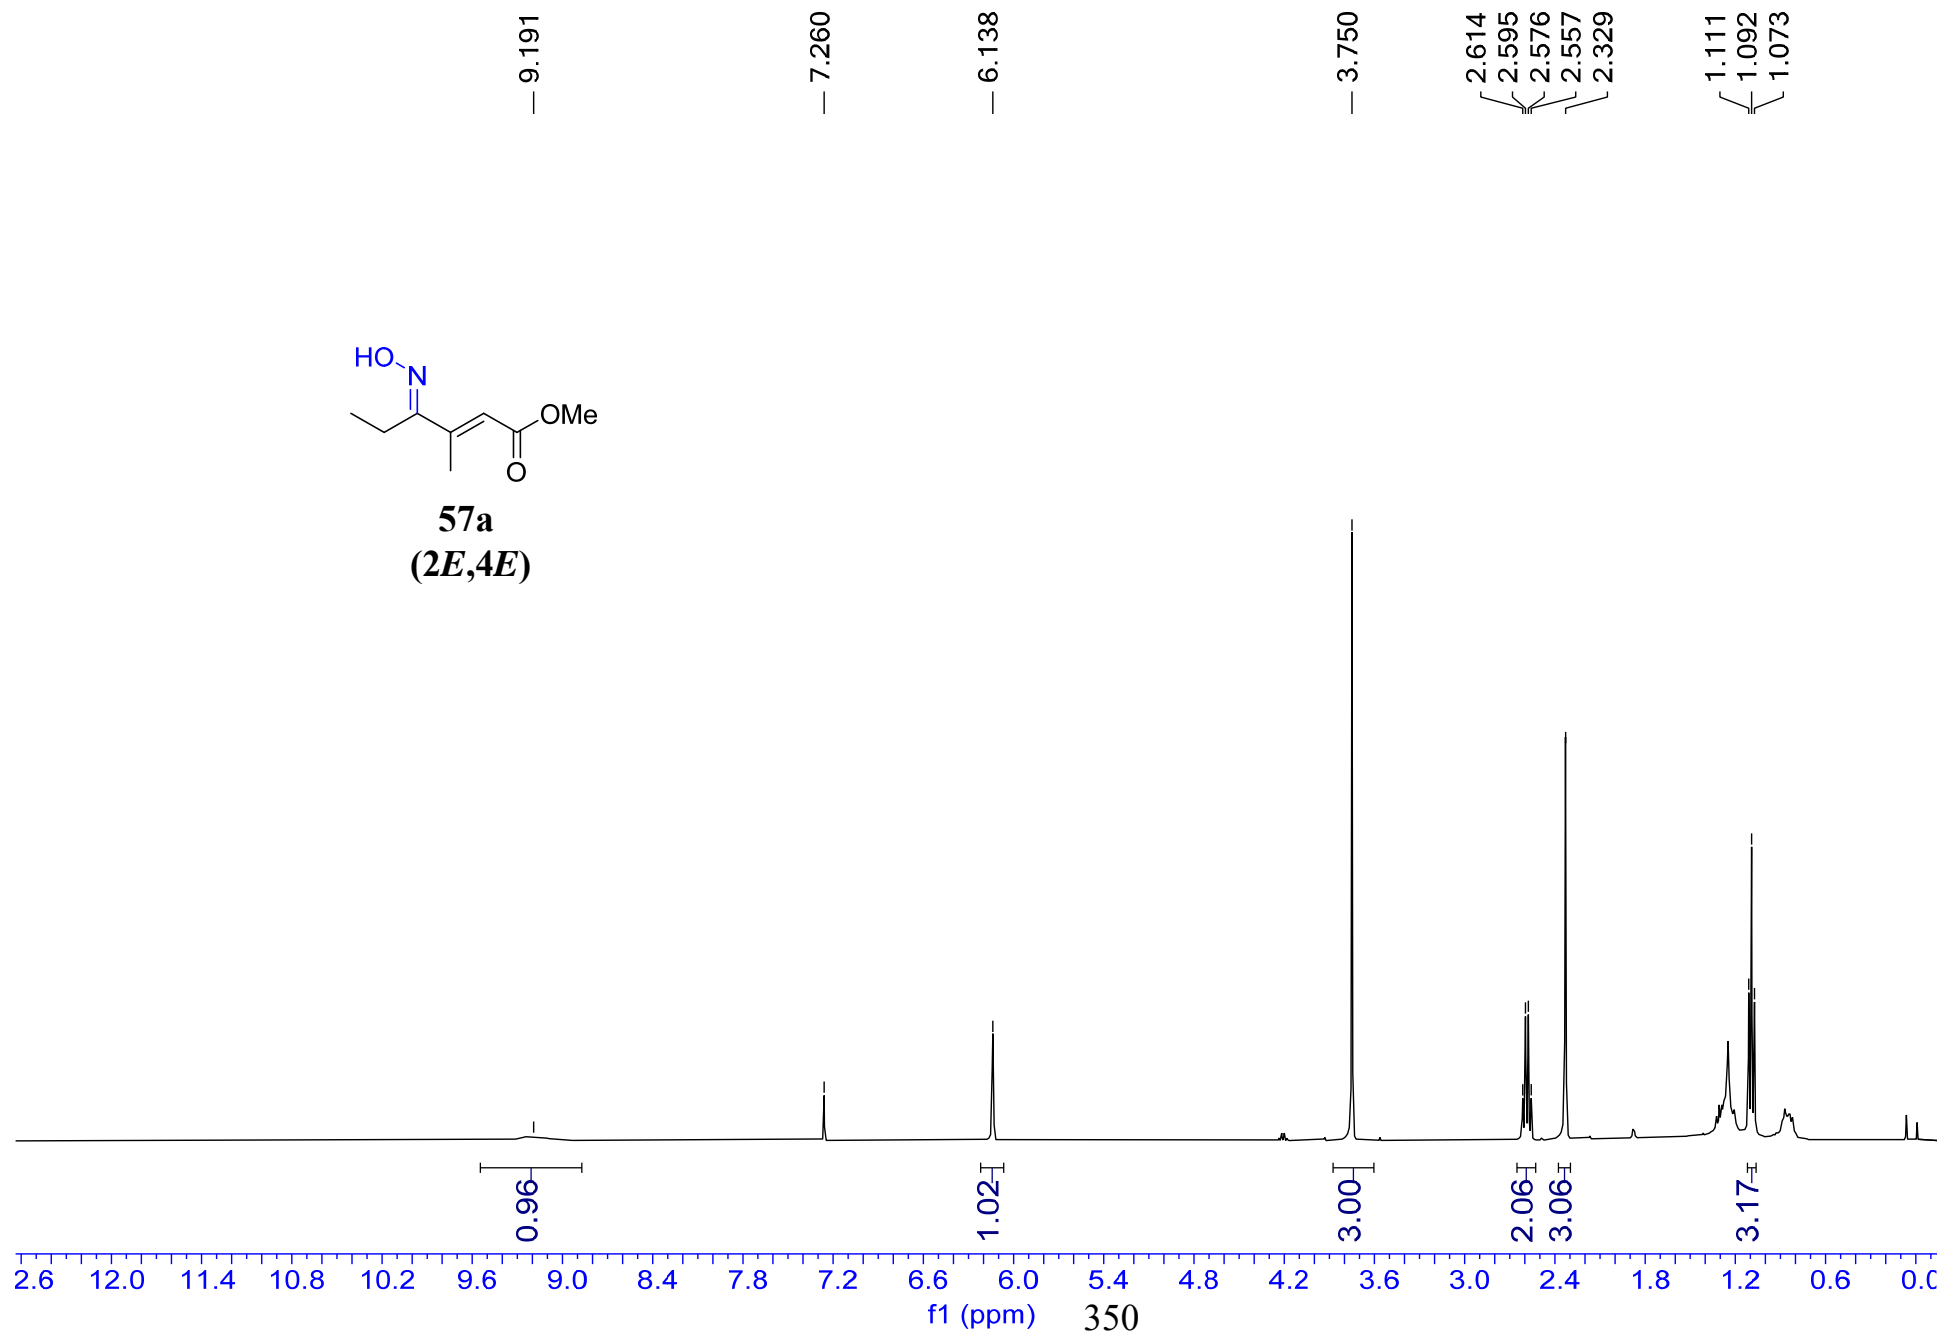

<sup>13</sup>C NMR 101 MHz, CDCl<sub>3</sub>

— 167.19  
— 162.13  
— 149.79

— 119.19

{ 77.48  
77.16  
76.84 }

— 51.52

— 17.98  
— 14.40  
— 11.14



**57a**  
**(2E,4E)**

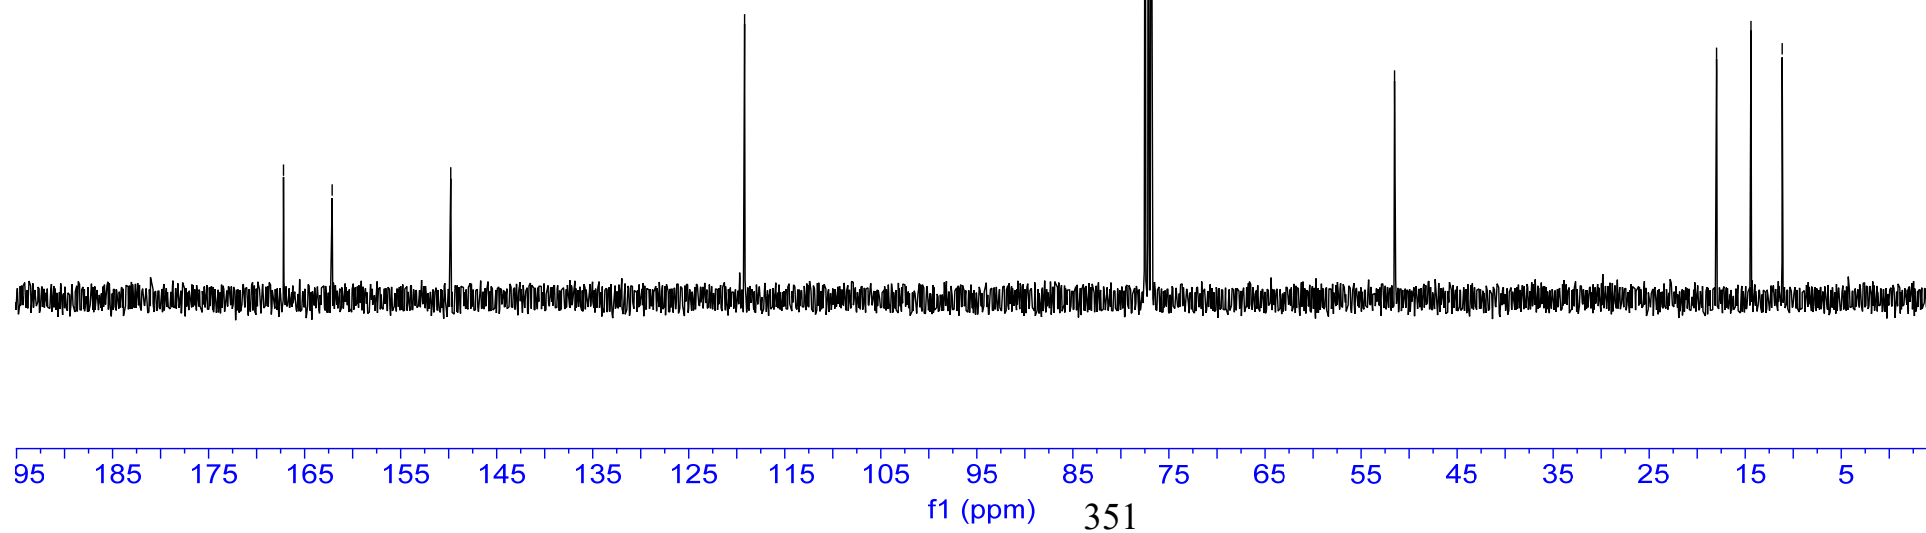

<sup>1</sup>H NMR, 400 MHz, CDCl<sub>3</sub>

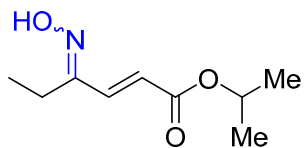

**58a**

(2*E*,4*E*)/(2*E*,4*Z*)=7:3

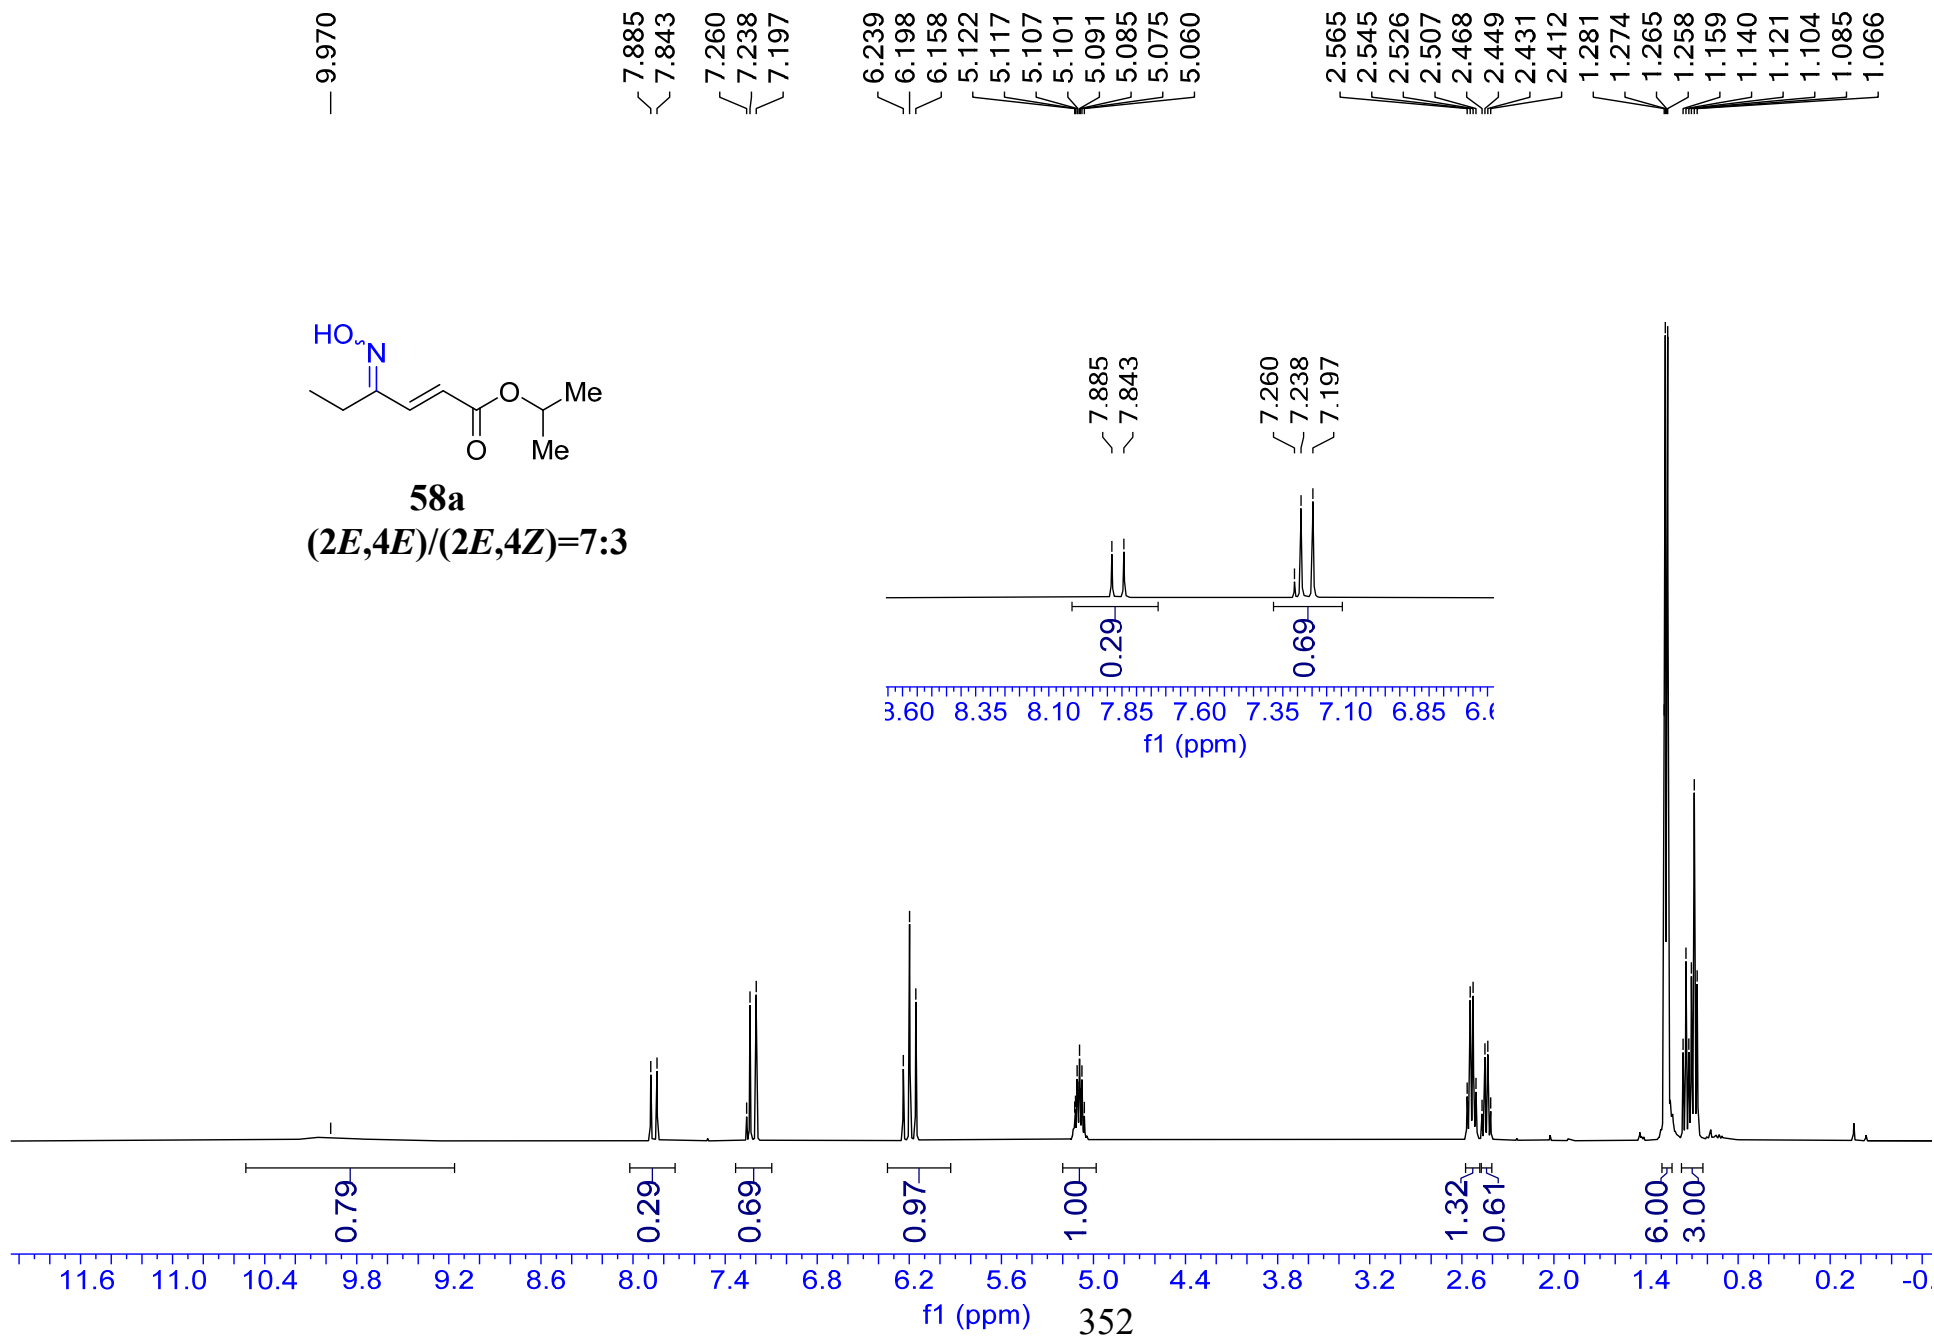

<sup>13</sup>C NMR 101 MHz, CDCl<sub>3</sub>

166.15  
160.03  
155.43

140.25

130.21  
125.90  
123.16

77.48  
77.16  
76.84  
68.70  
68.45

24.34  
21.91  
21.88  
17.67  
11.62  
10.67

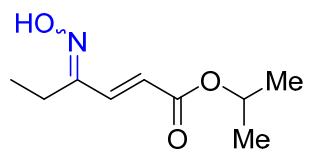

**58a**

**(2*E*,4*E*)/(2*E*,4*Z*)=7:3**

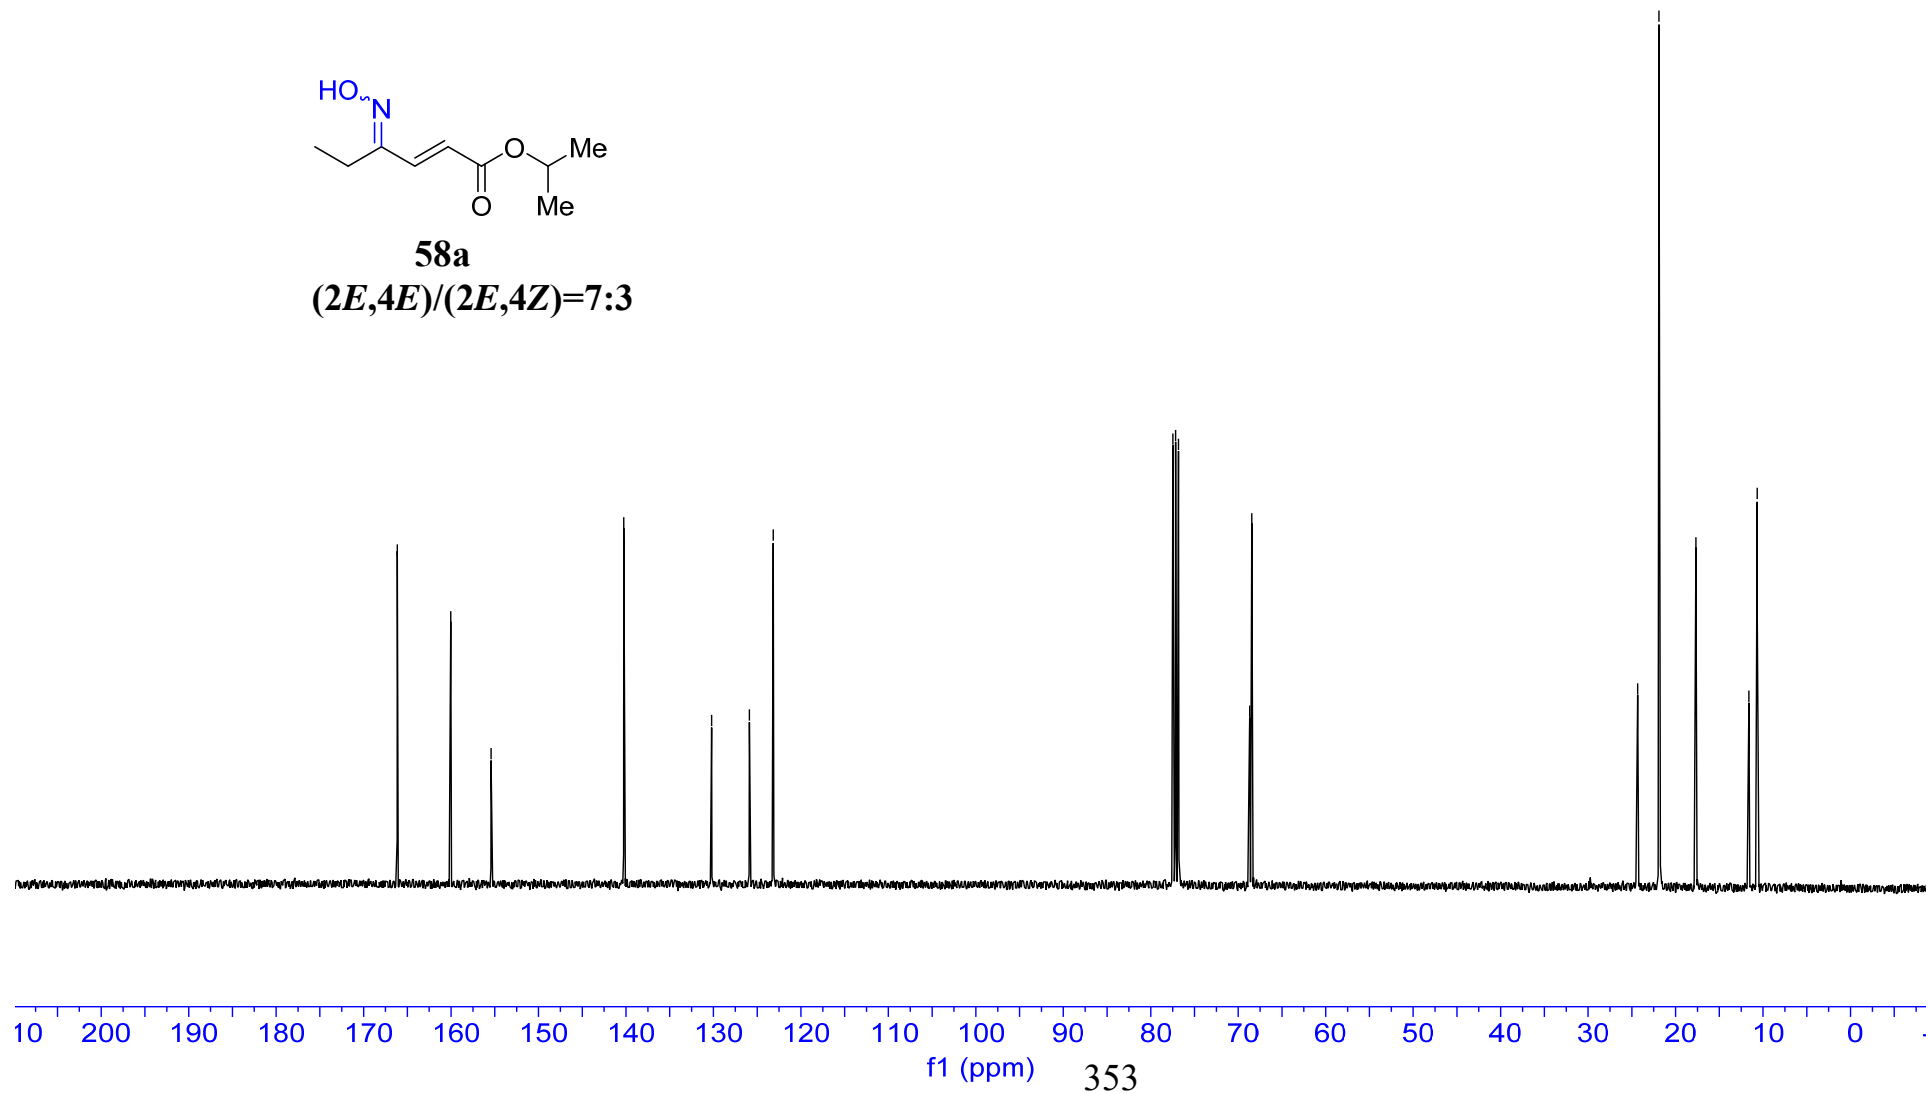

<sup>1</sup>H NMR, 400 MHz, CDCl<sub>3</sub>

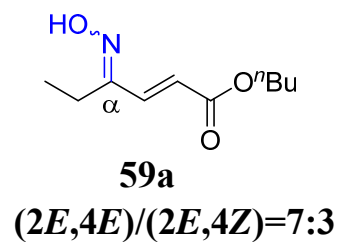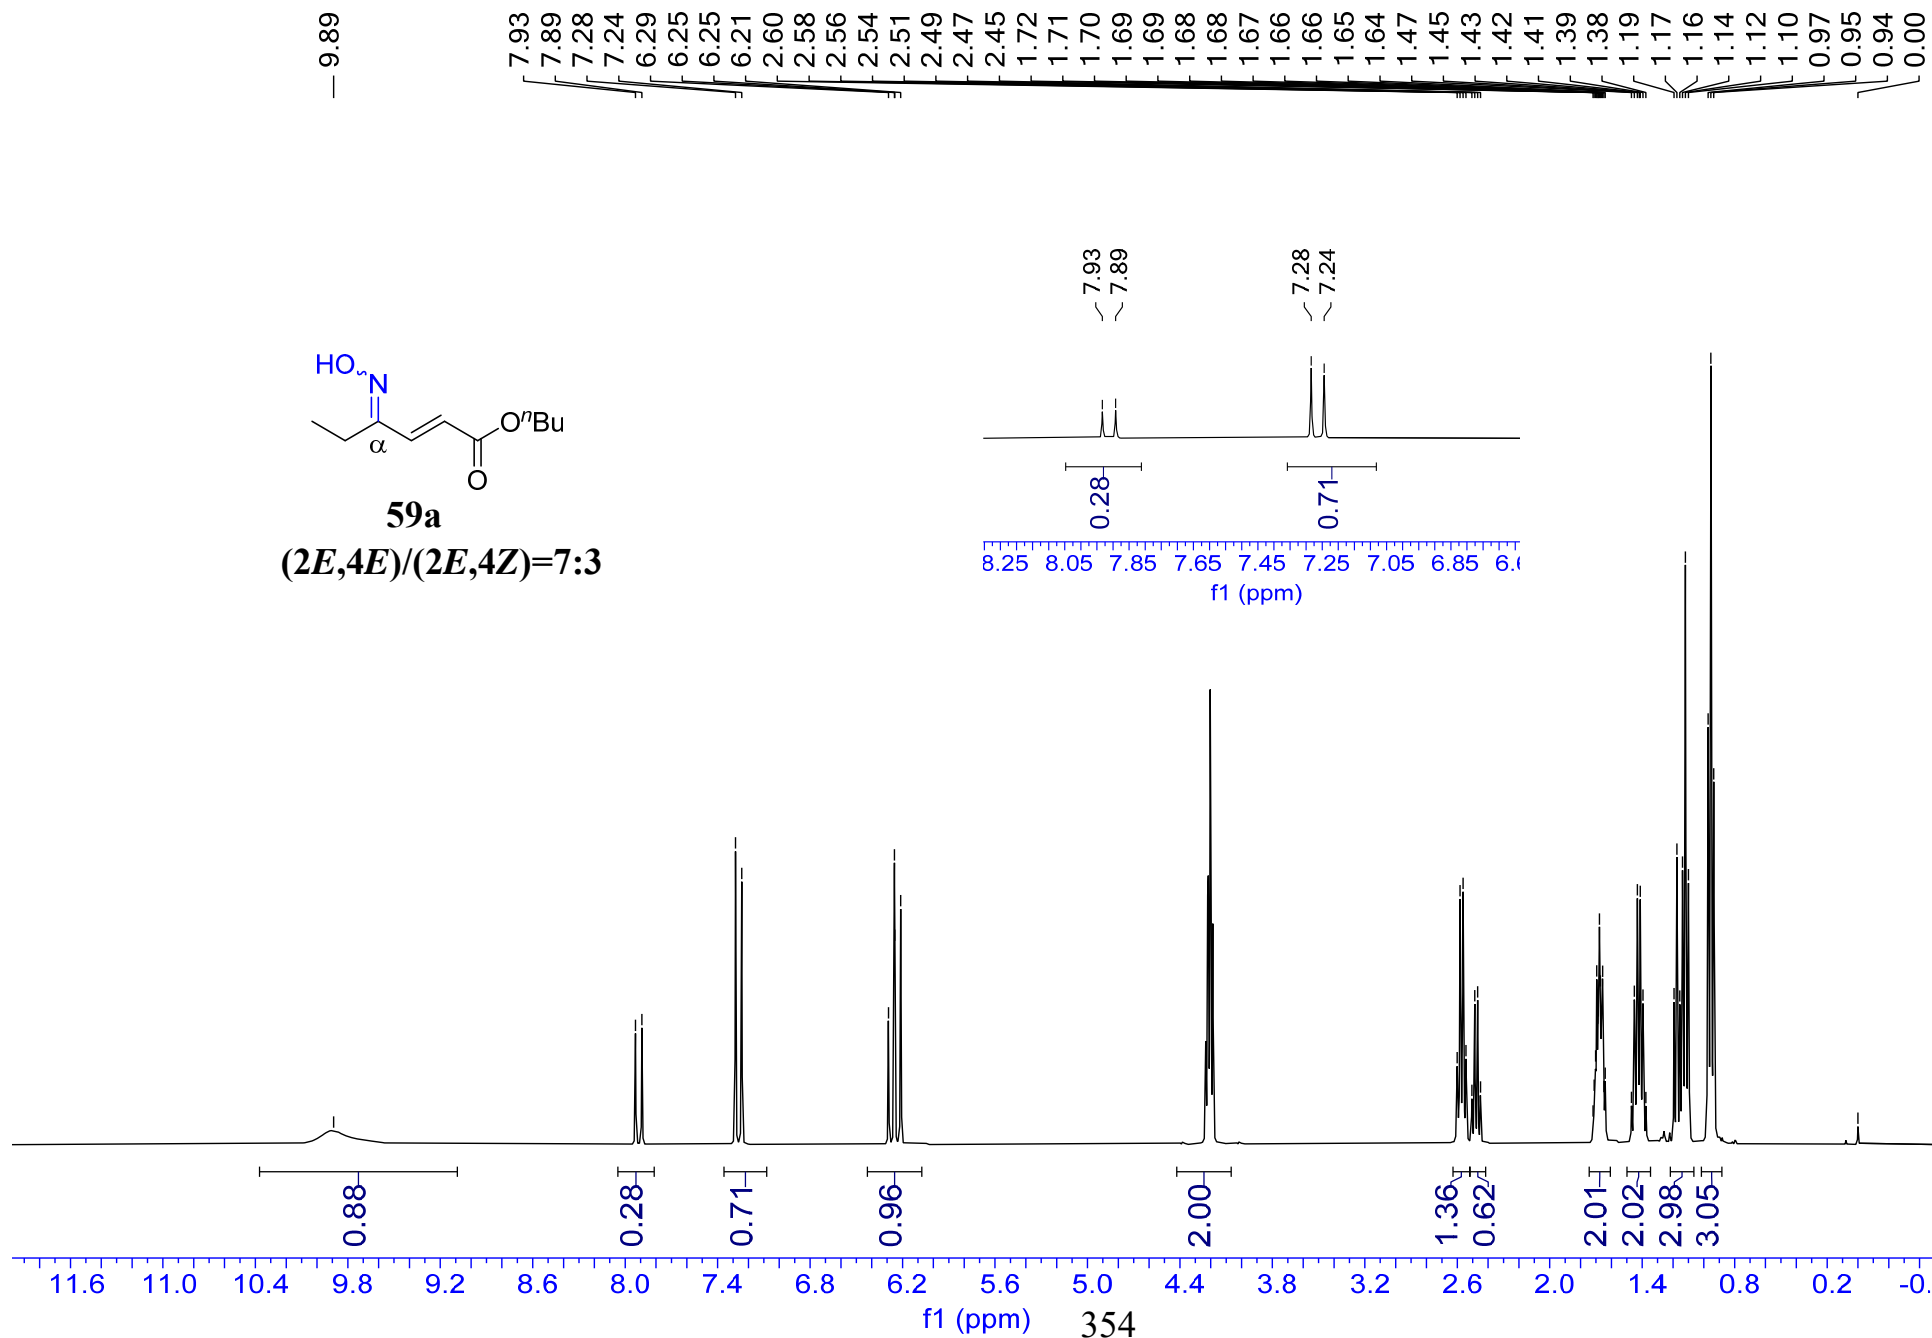

<sup>13</sup>C NMR 101 MHz, CDCl<sub>3</sub>

— 166.72  
— 160.08  
— 155.42

— 140.46

~ 130.45  
/ 125.42  
\ 122.71

77.48  
77.16  
76.84

65.09  
64.91

30.75  
30.72  
24.37  
19.23  
17.69  
13.78  
11.56  
10.68

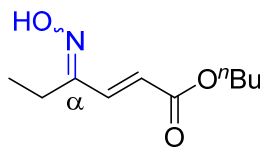

**59a**

(2*E*,4*E*)/(2*E*,4*Z*)=7:3

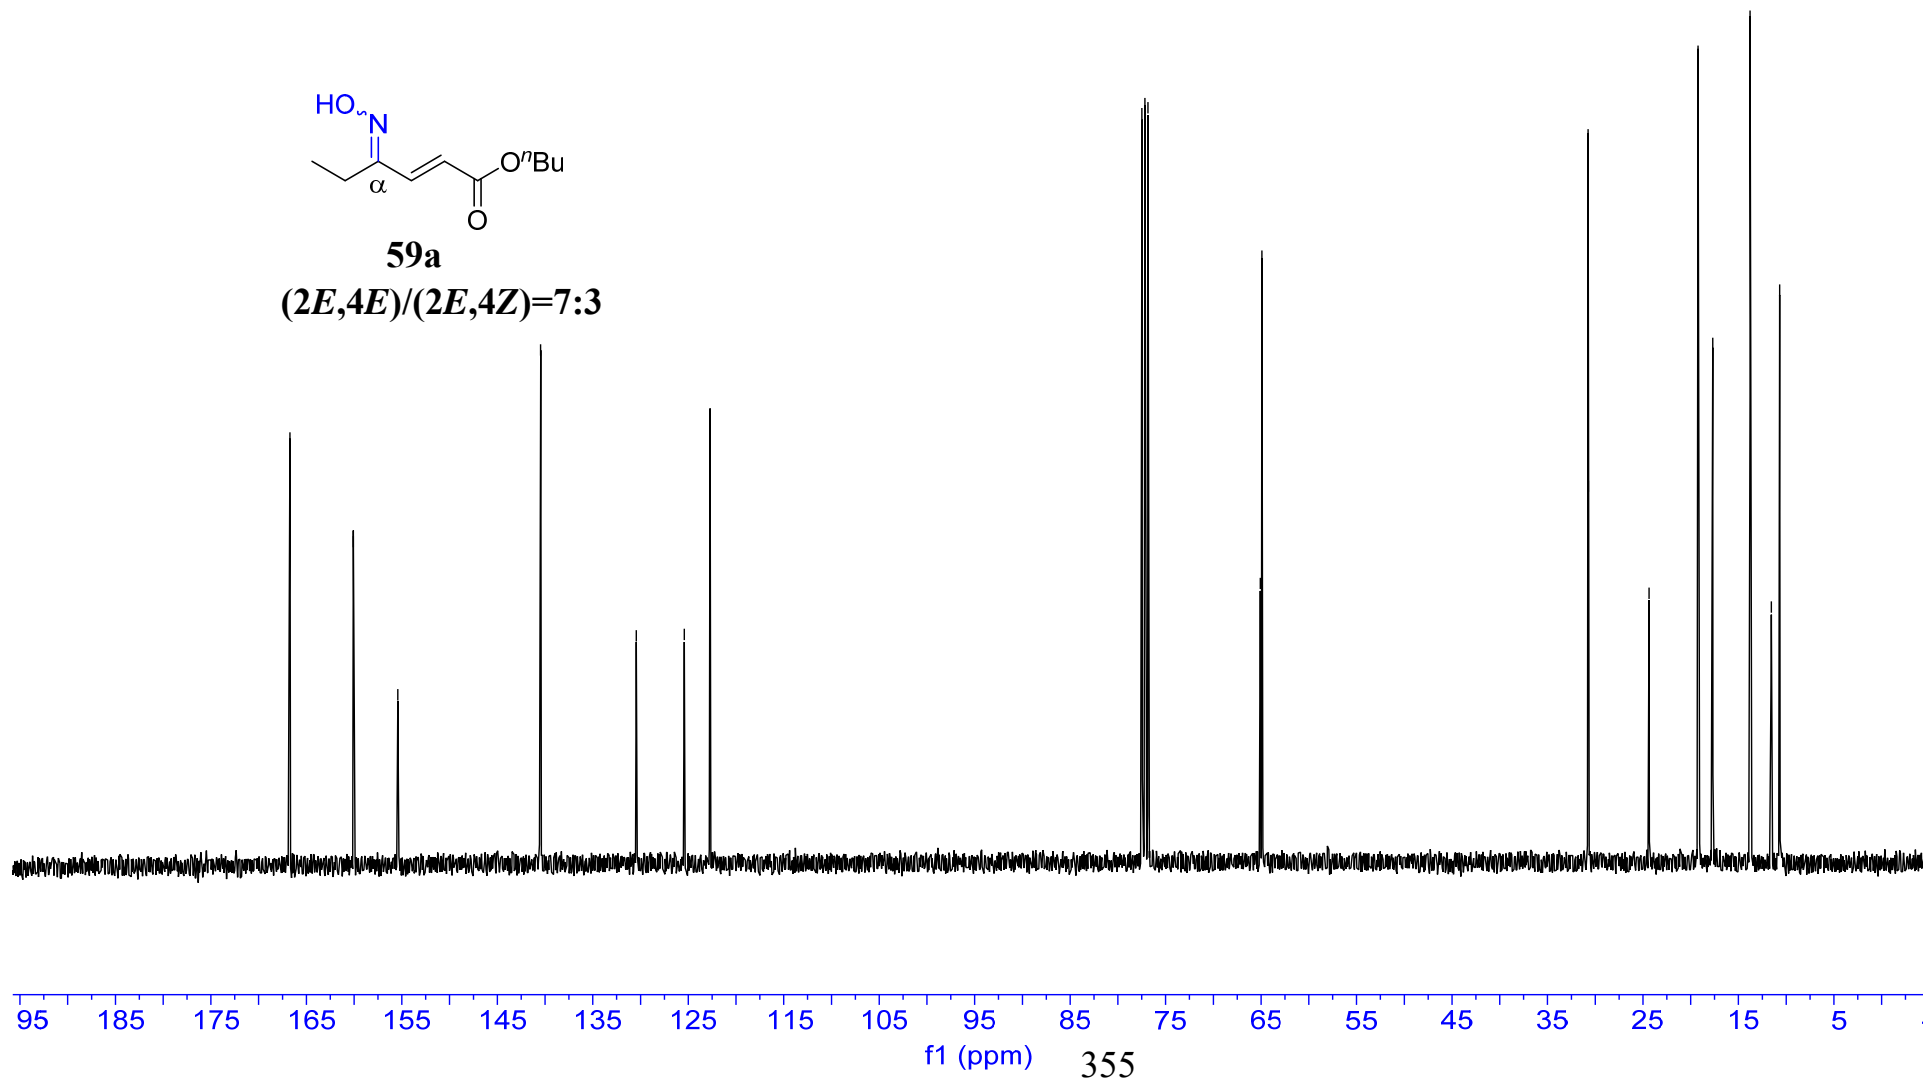

<sup>1</sup>H NMR, 400 MHz, CDCl<sub>3</sub>

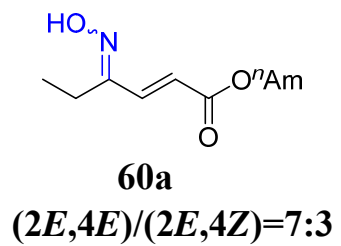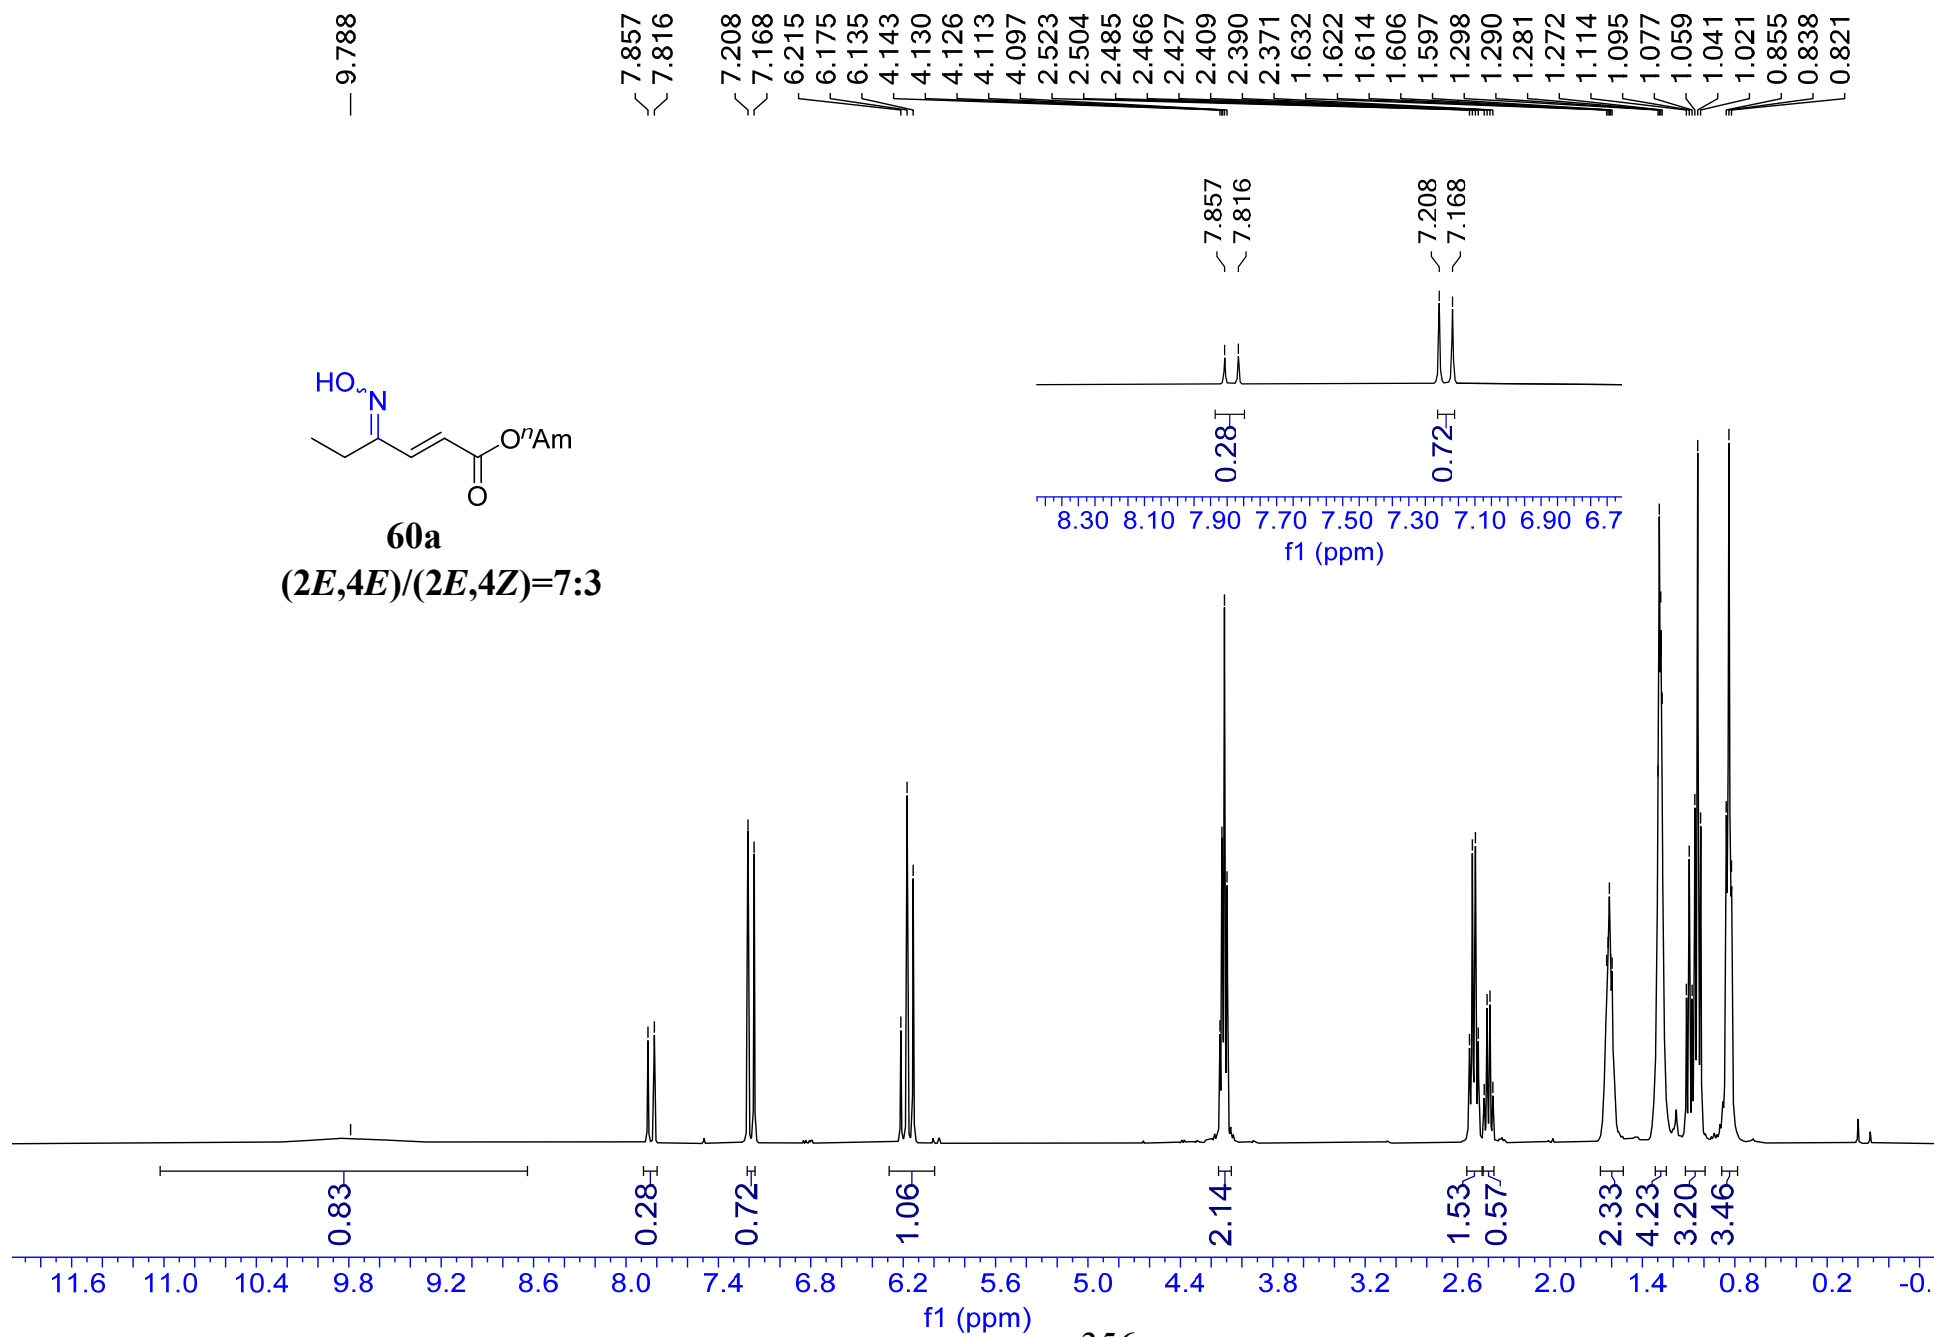



<sup>13</sup>C NMR 101 MHz, CDCl<sub>3</sub>

— 166.73  
— 160.05  
— 155.40

— 140.48

~ 130.47  
/ 125.41  
\ 122.69

77.48  
77.16  
76.84

65.38  
65.21

28.40  
28.37  
28.15  
28.13  
24.36  
22.40  
17.69  
14.01  
11.58  
10.68

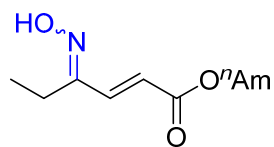

**60a**

(2*E*,4*E*)/(2*E*,4*Z*)=7:3

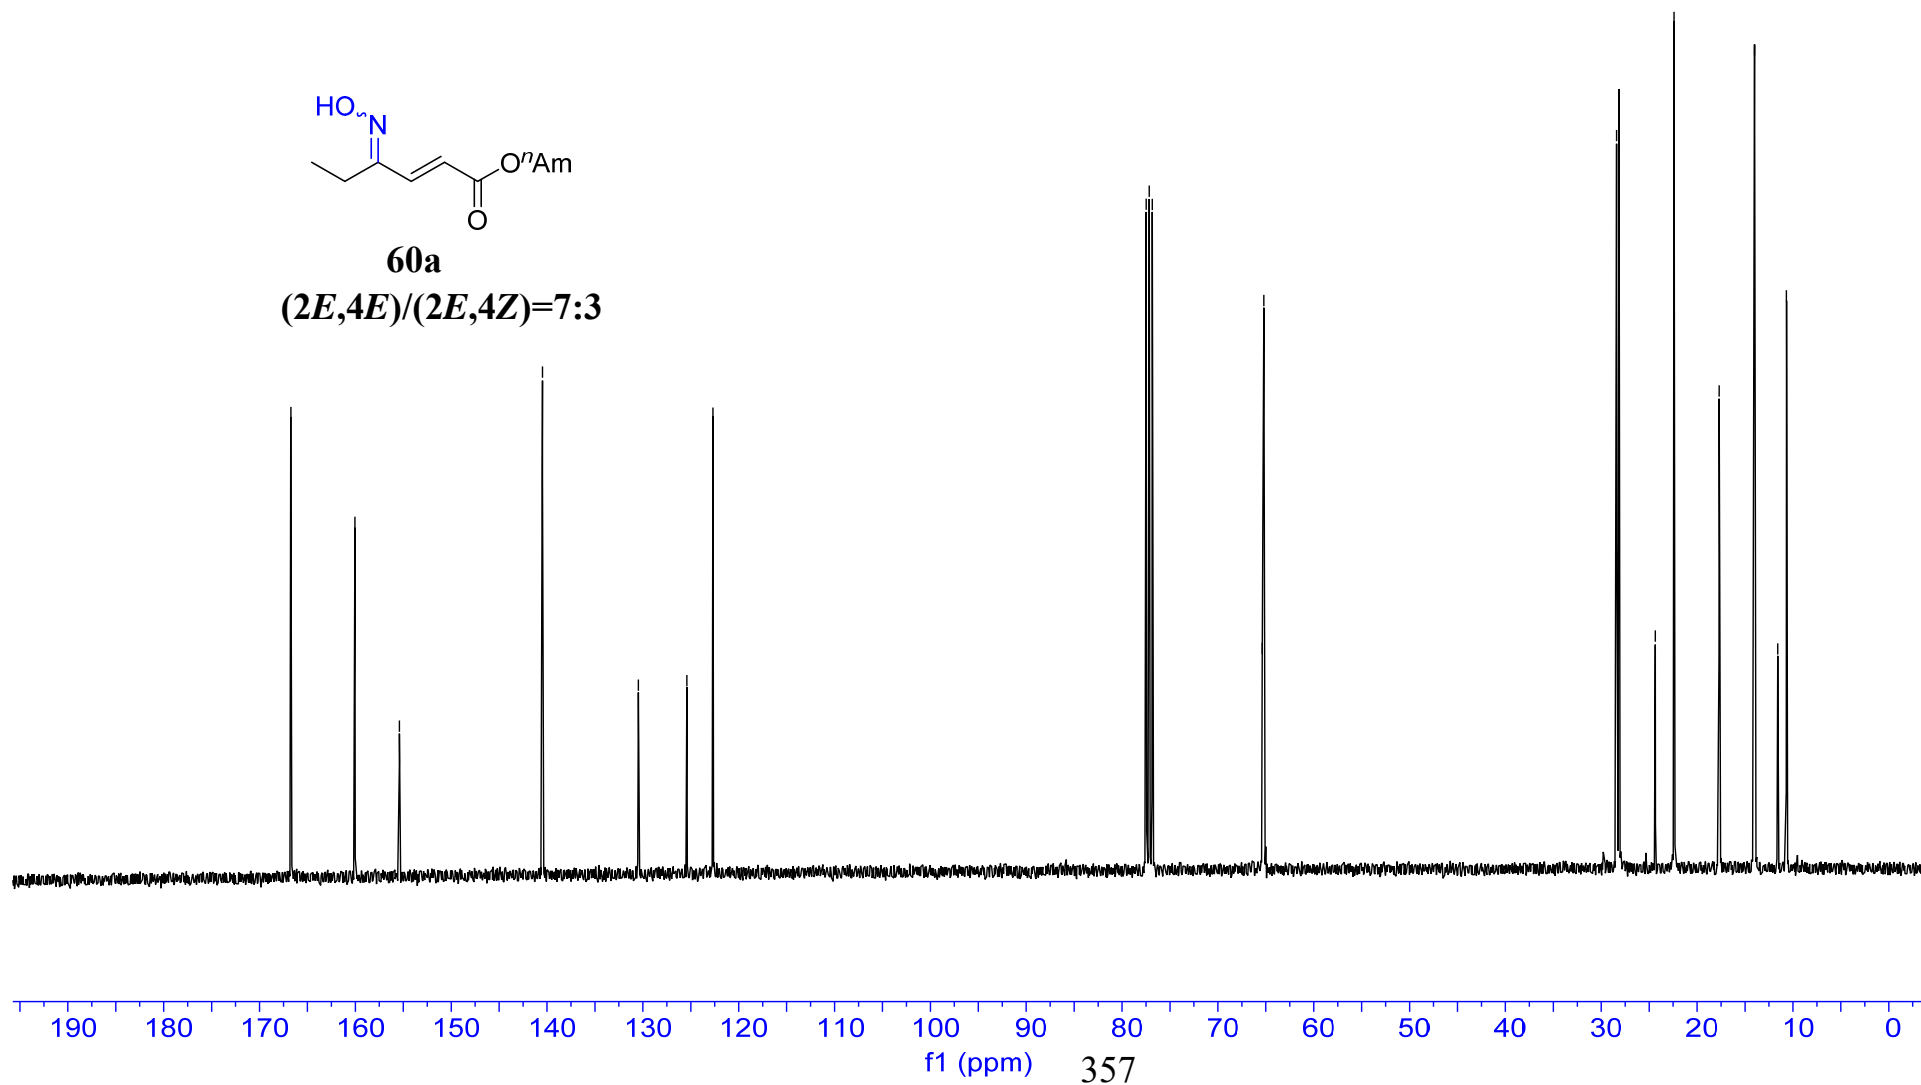

<sup>1</sup>H NMR, 400 MHz, CDCl<sub>3</sub>

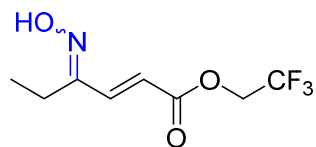

**61a**

(2*E*,4*E*)/(2*E*,4*Z*)=9:1

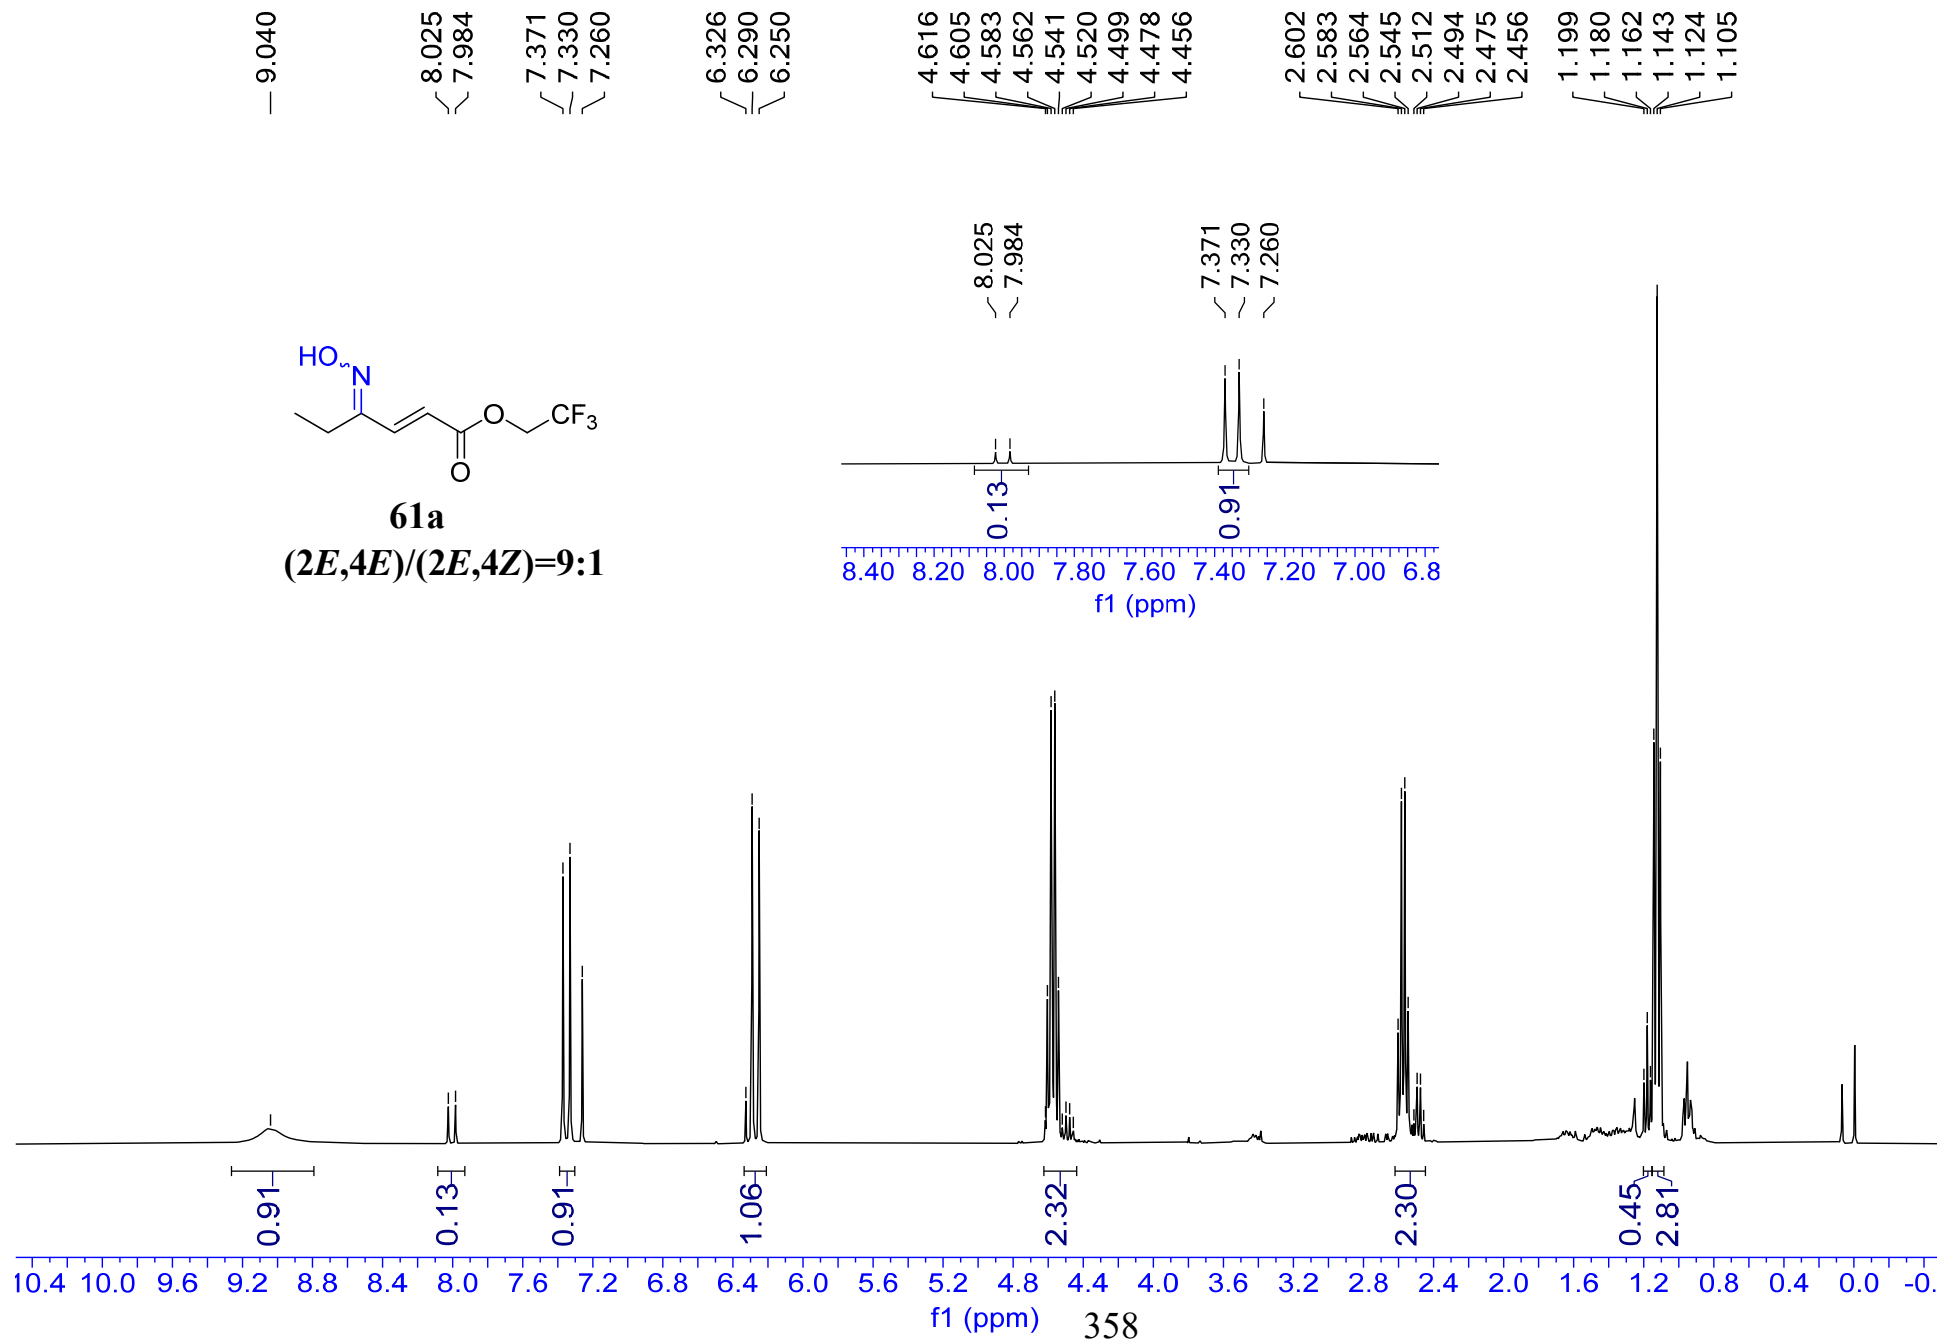

<sup>13</sup>C NMR 101 MHz, CDCl<sub>3</sub>

164.75  
160.14  
155.18

143.02

132.63

124.47

123.04

121.72

120.44

77.47  
77.16  
76.84

61.30  
60.94  
60.57  
60.21

24.40  
17.71  
11.44  
10.67

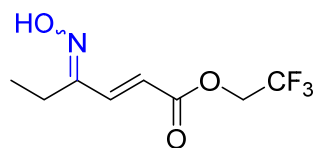

**61a**

(2*E*,4*E*)/(2*E*,4*Z*)=9:1

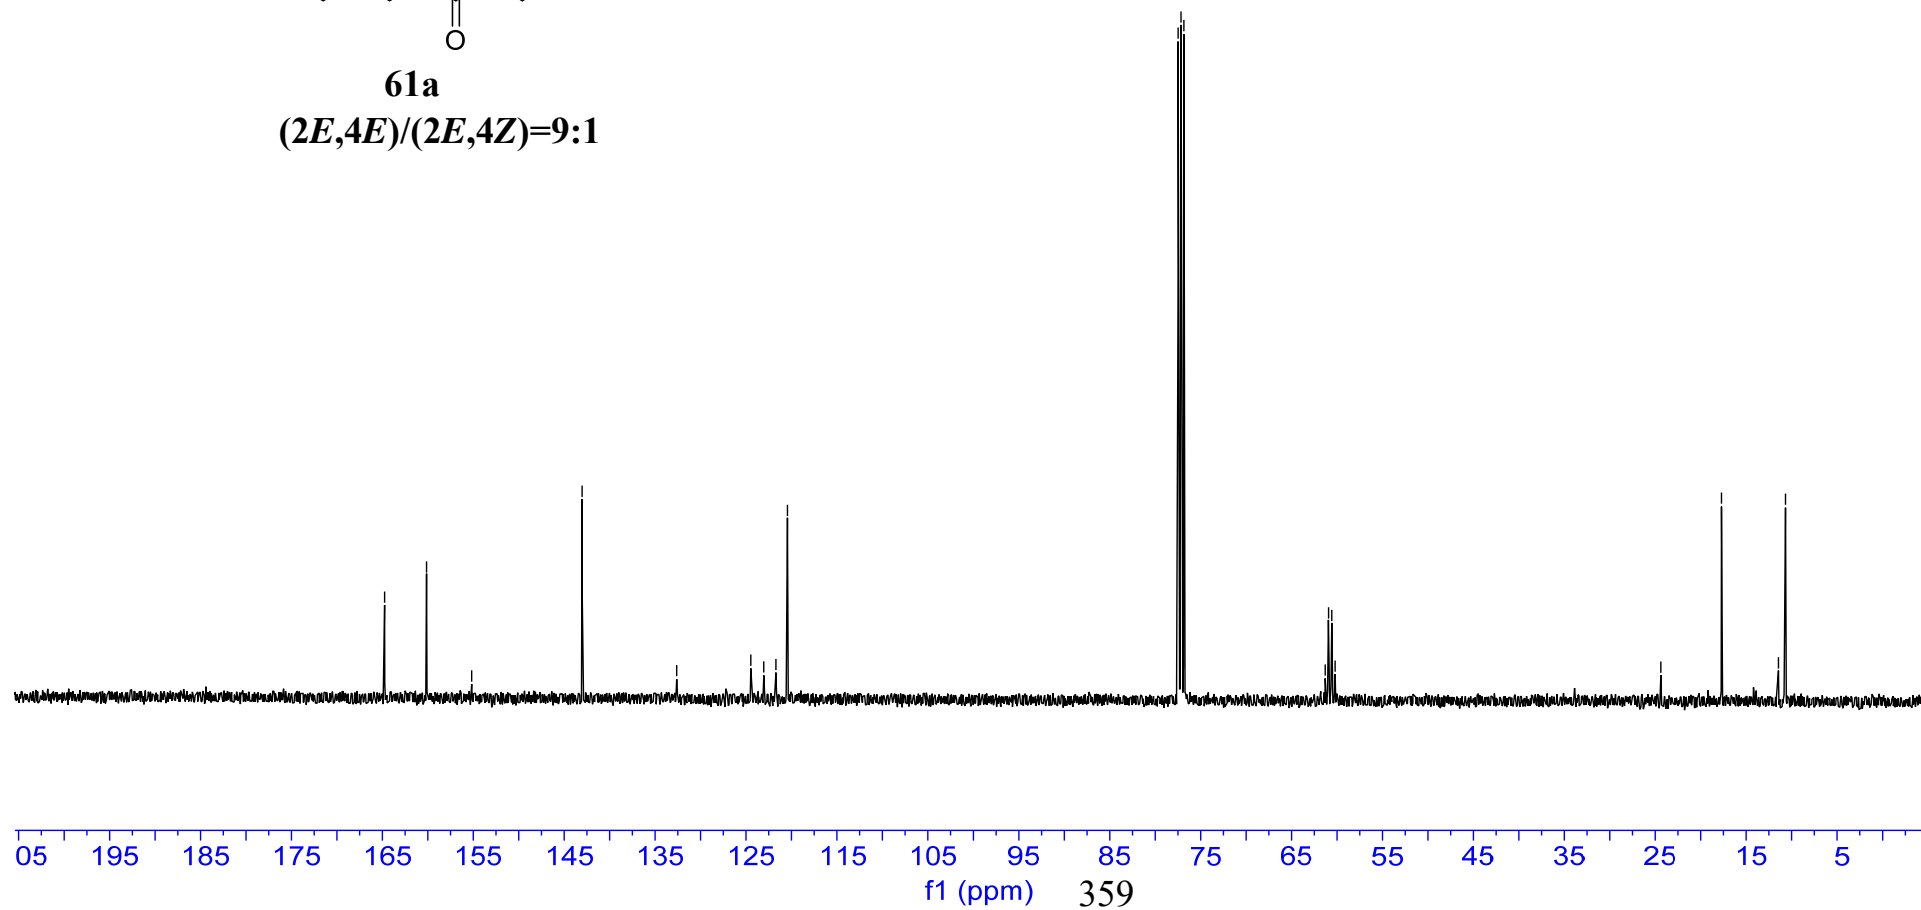

<sup>1</sup>H NMR, 400 MHz, CDCl<sub>3</sub>

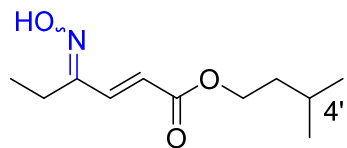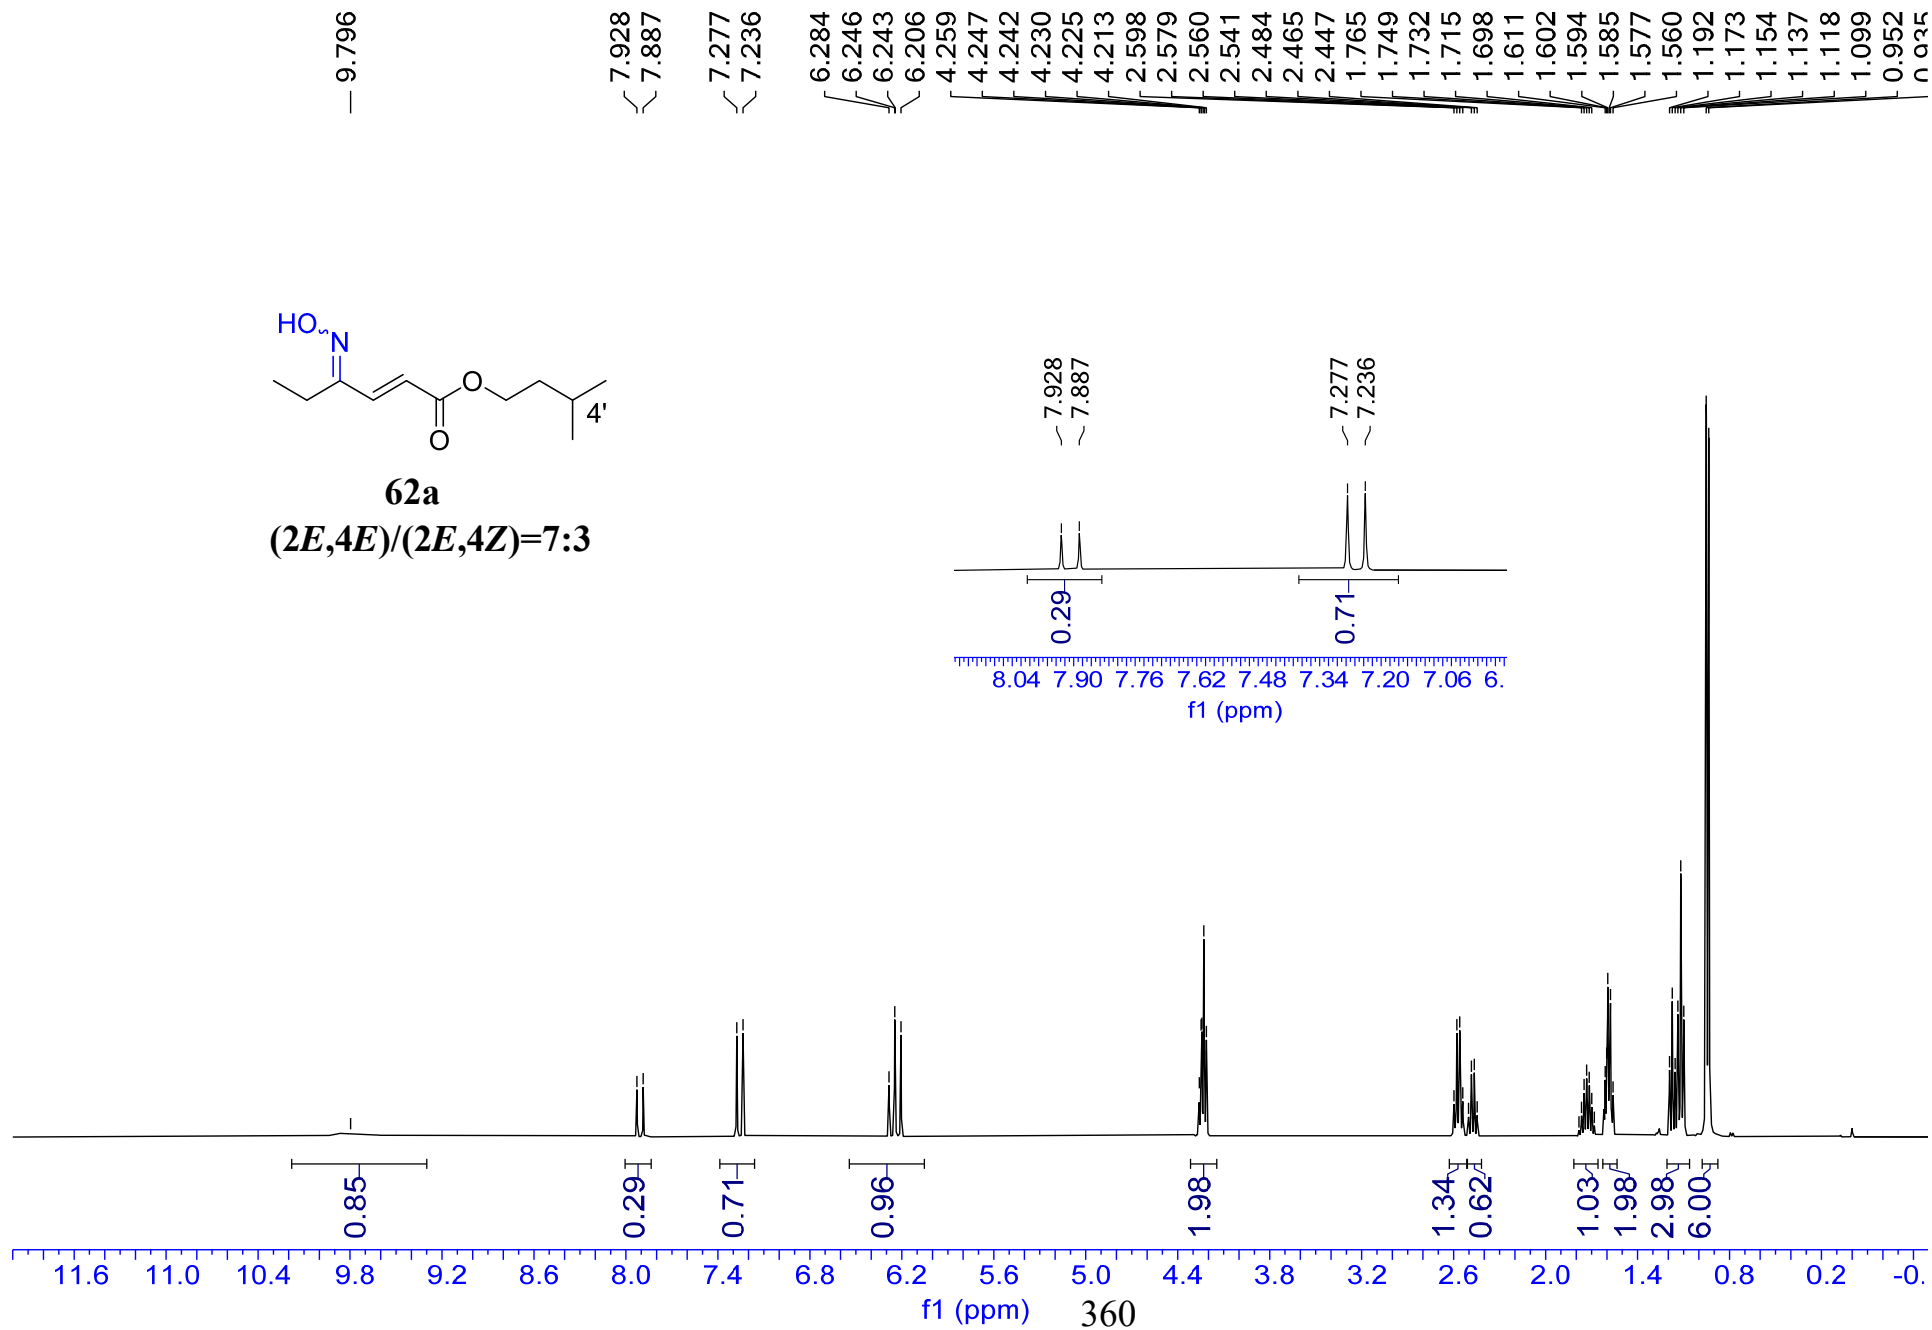

<sup>13</sup>C NMR 101 MHz, CDCl<sub>3</sub>

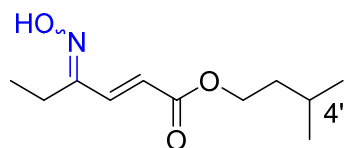

**62a**

**(2*E*,4*E*)/(2*E*,4*Z*)=7:3**

166.70  
160.09  
155.42

140.47

130.46  
125.43  
122.73

77.48  
77.16  
76.84

63.90  
63.71

37.42  
37.39

25.18  
25.16  
24.38  
22.55  
17.70  
11.56  
10.70

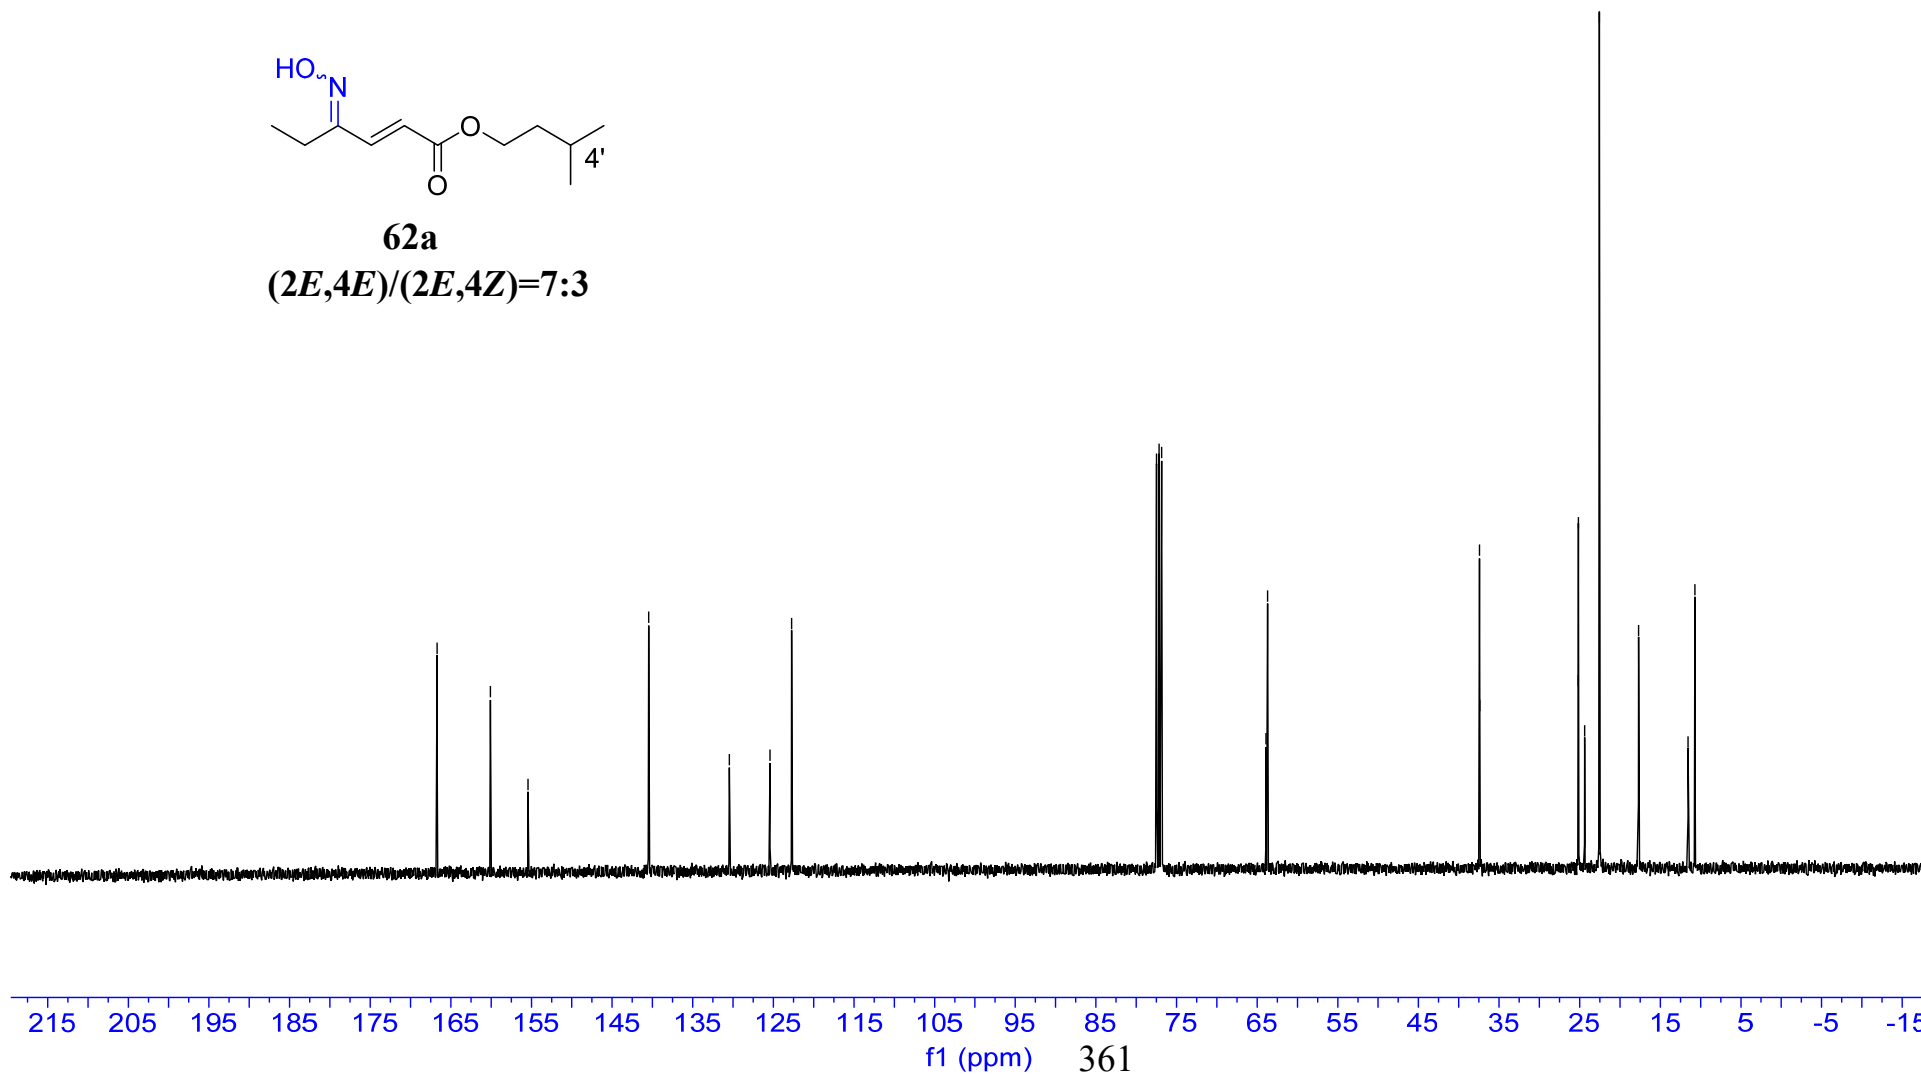

<sup>1</sup>H NMR, 400 MHz, CDCl<sub>3</sub>

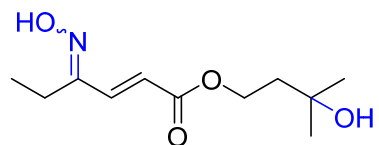

**62a-4'-OH**  
(2*E*,4*E*)/(2*E*,4*Z*)=8:3

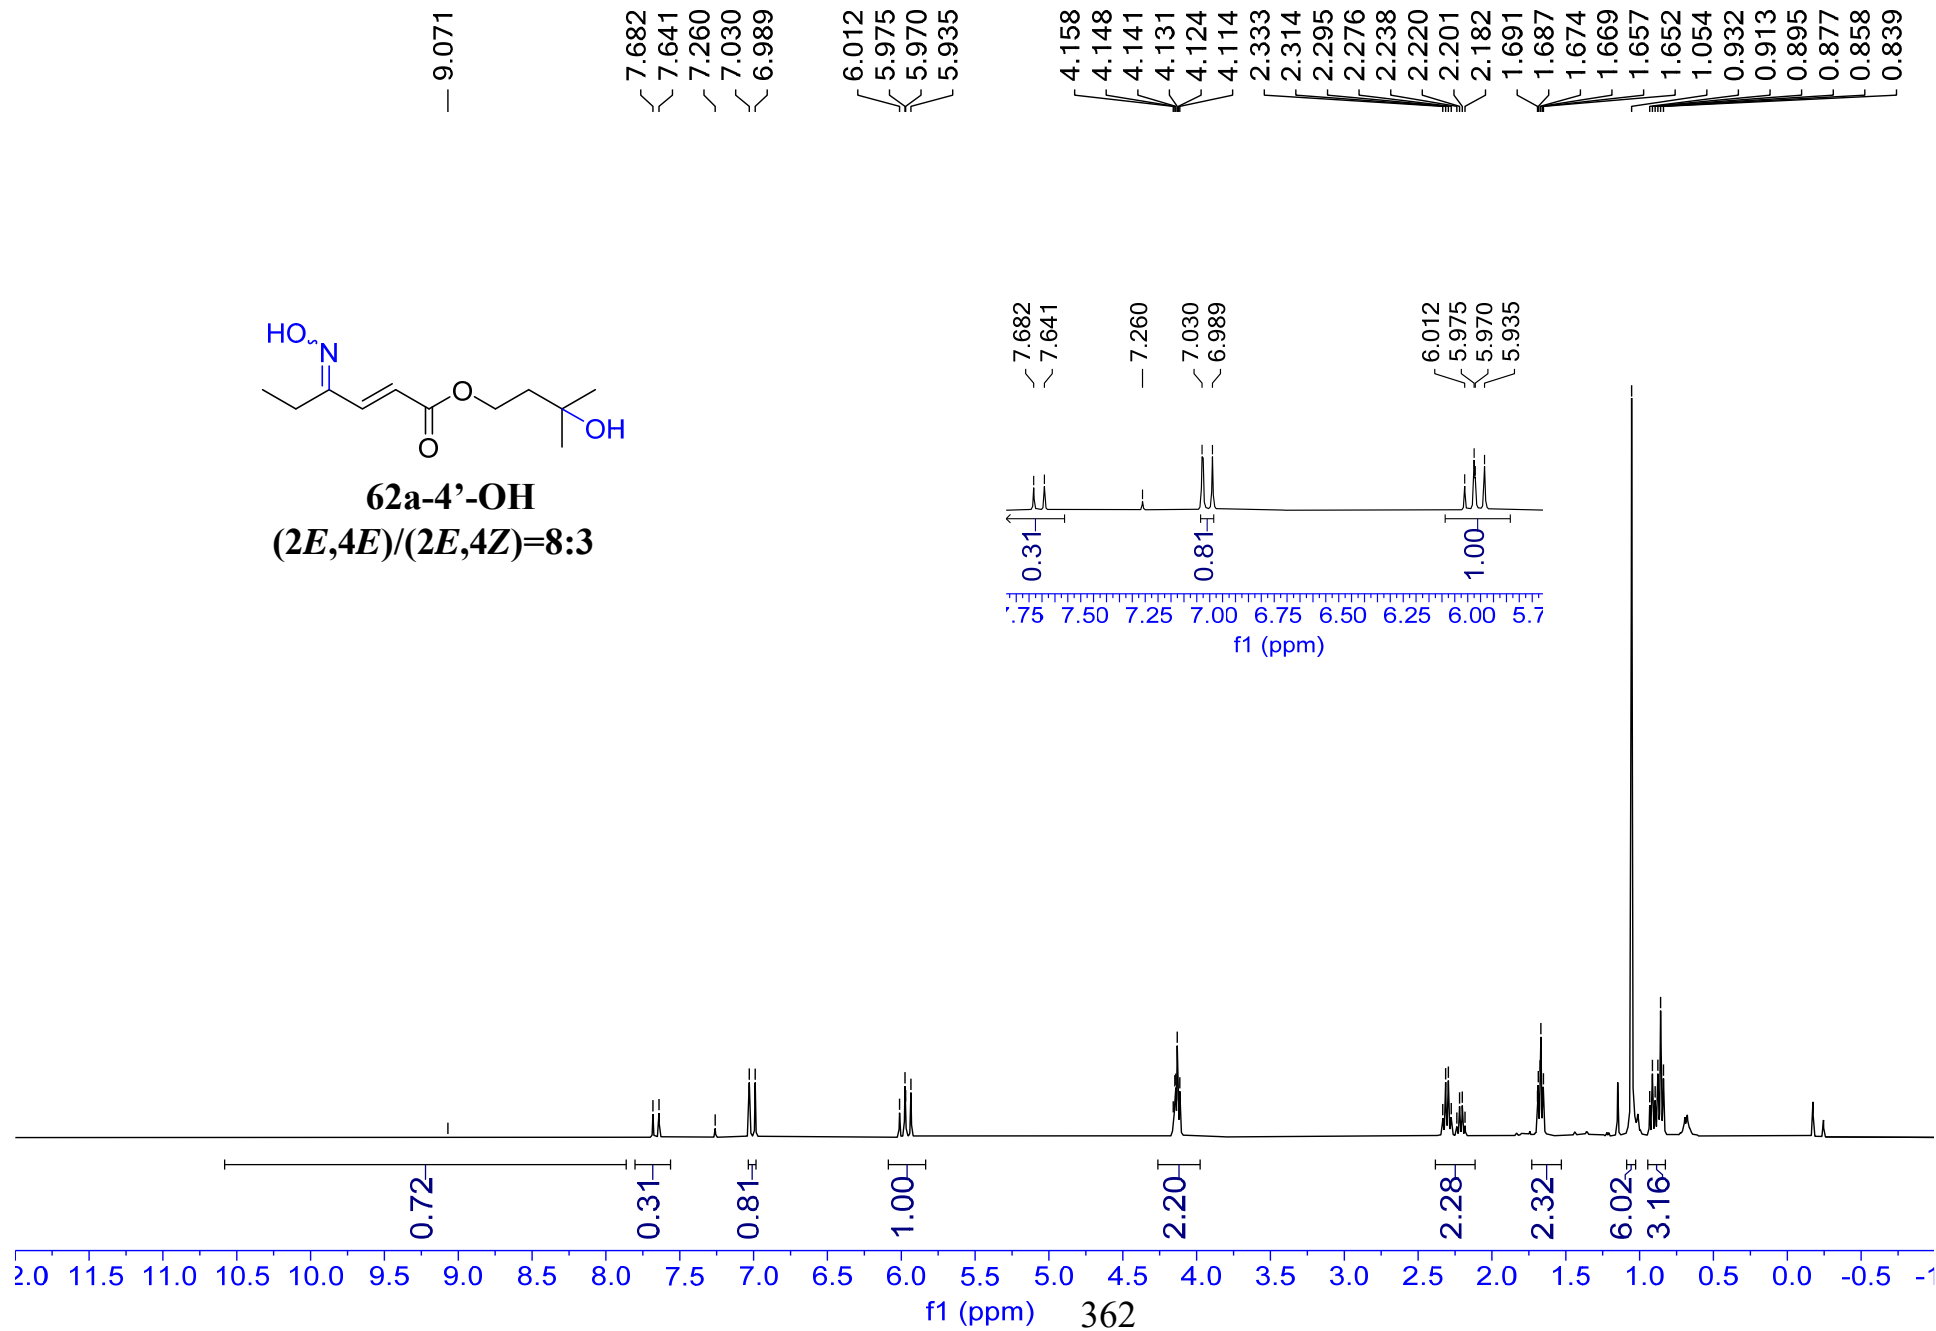

<sup>13</sup>C NMR 101 MHz, CDCl<sub>3</sub>

— 166.61 — 160.07 — 155.44 — 141.02 ~ 130.76 < 124.97 < 122.28  
77.48 { 77.16 { 76.84 — 70.37 { 62.13 { 61.97 — 41.71 { 29.78 { 29.76 { 28.07 { 24.38 { 17.68 { 11.65 { 10.74 {

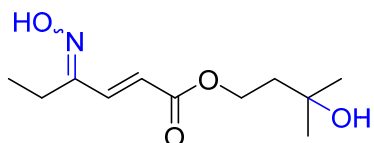

**62a-4'-OH**  
**(2*E*,4*E*)/(2*E*,4*Z*)=8:3**

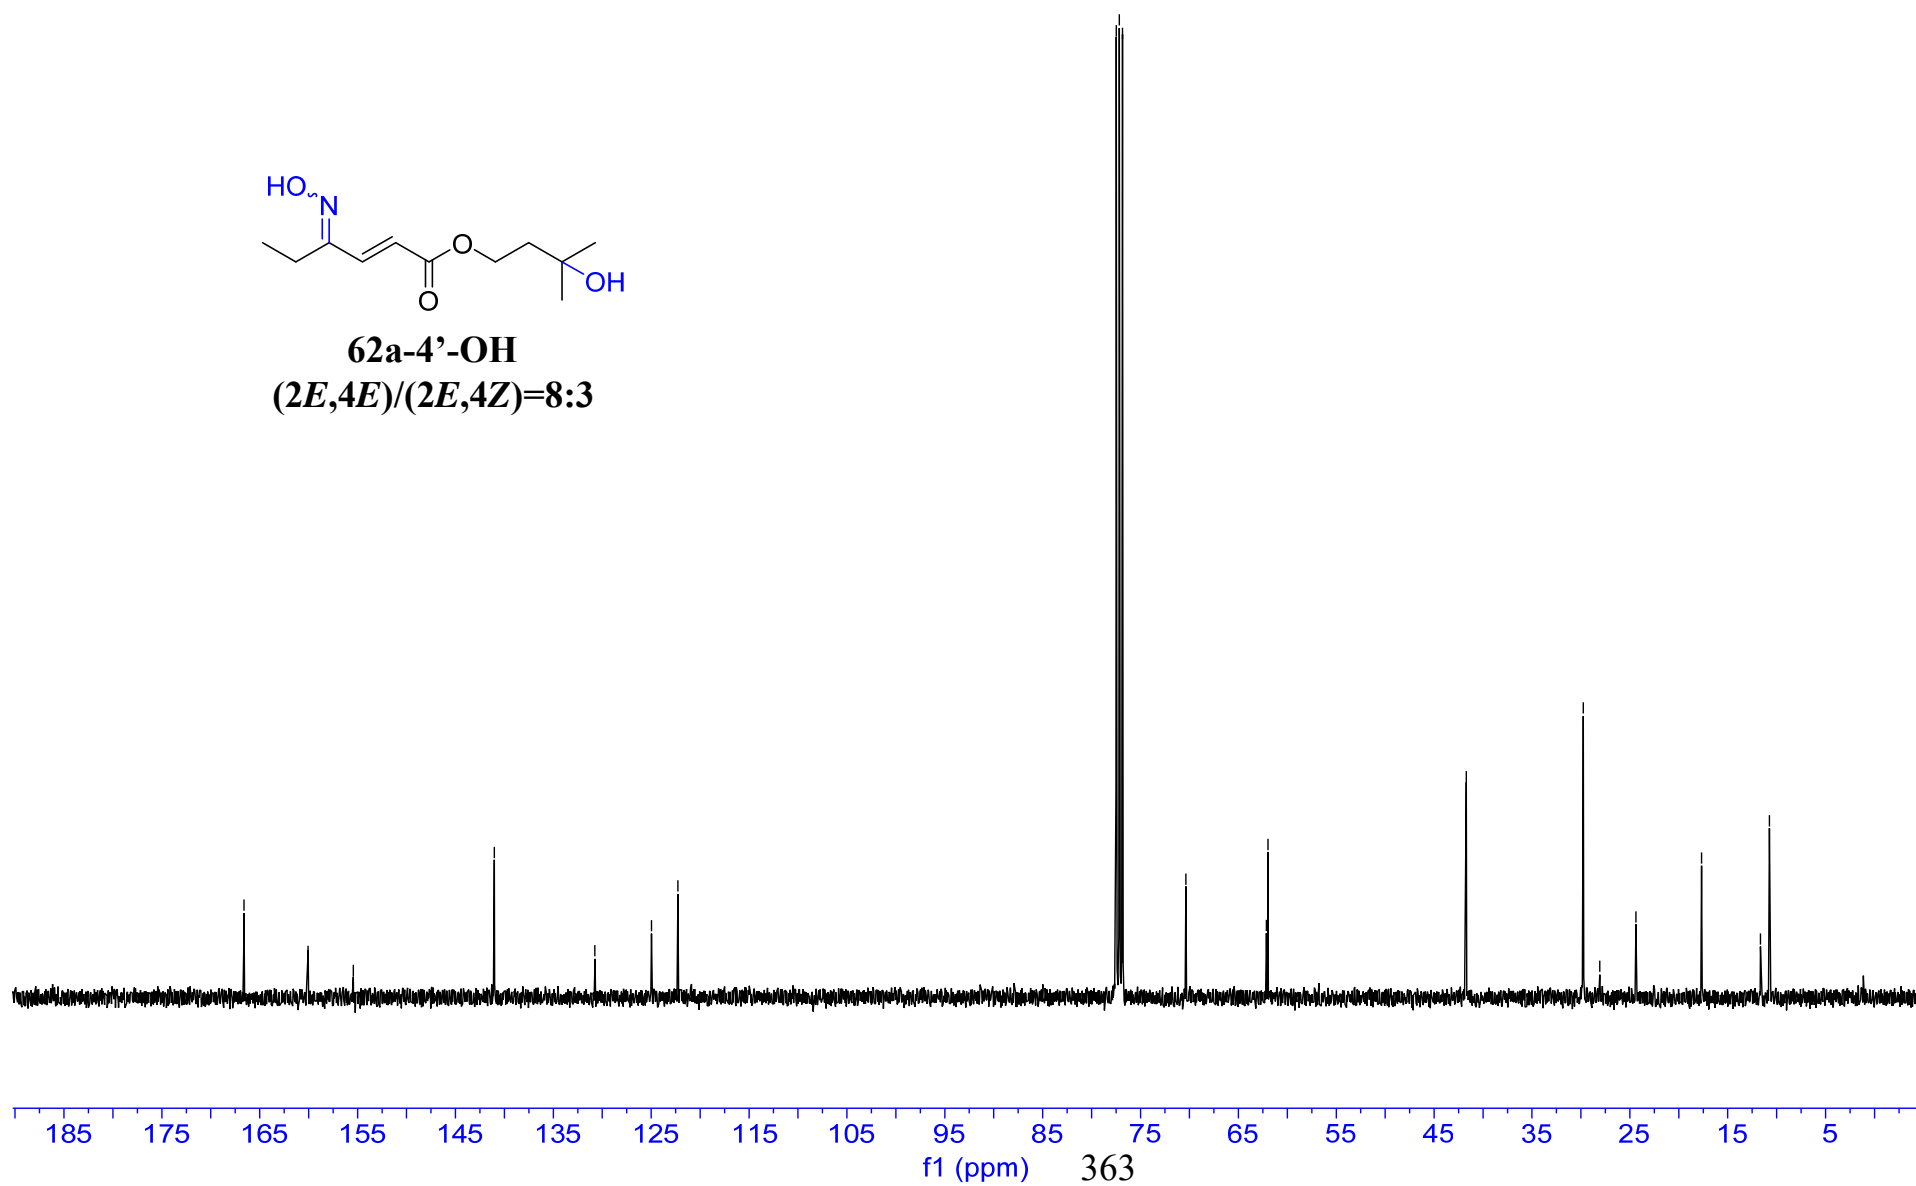

<sup>1</sup>H NMR, 400 MHz, CDCl<sub>3</sub>

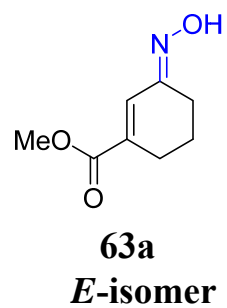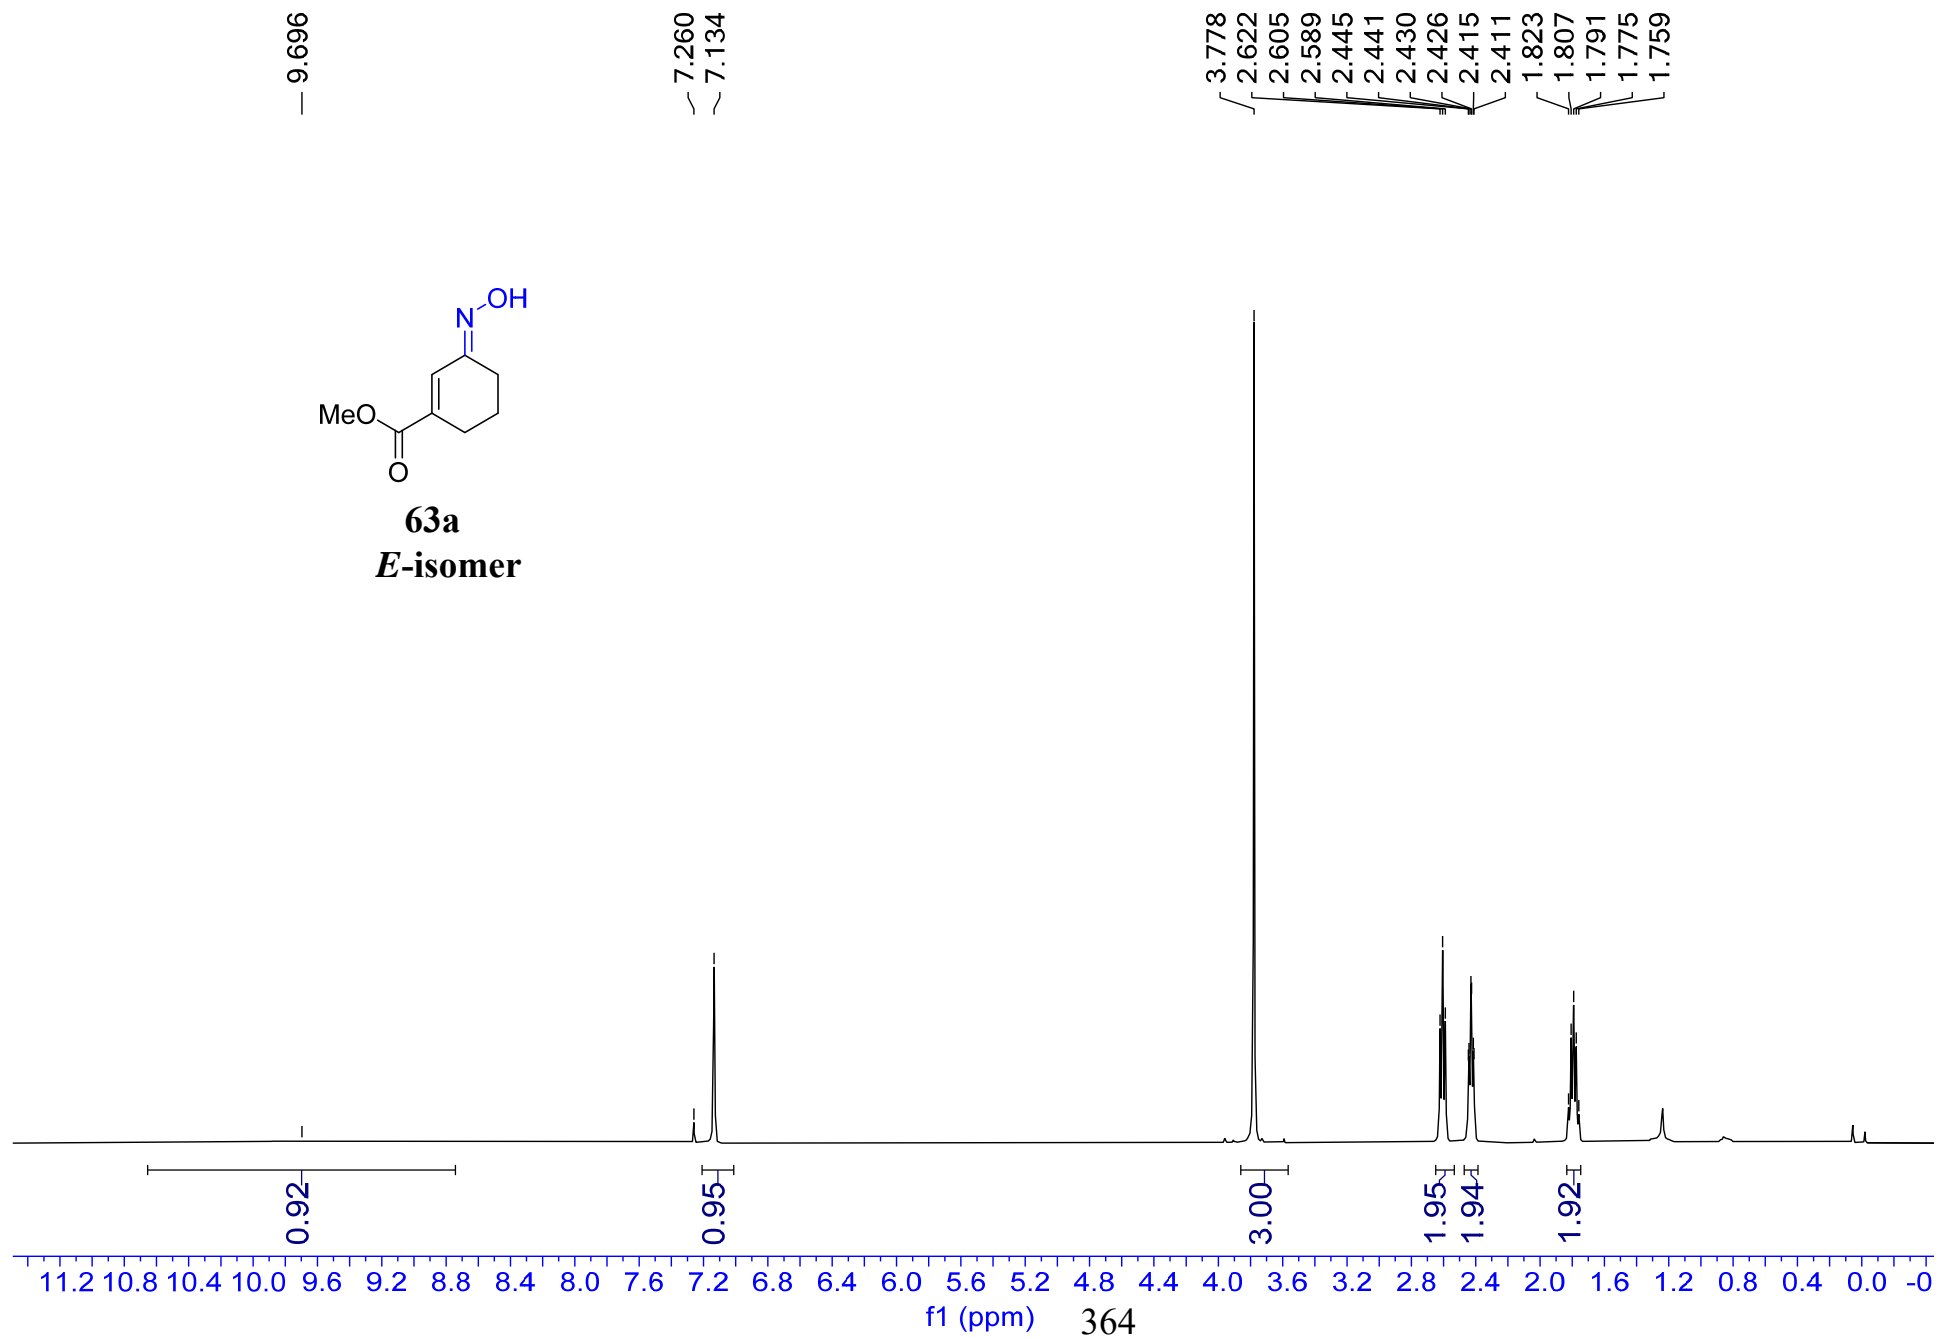



$^{13}\text{C}$  NMR 101 MHz,  $\text{CDCl}_3$

— 167.43

— 156.52

— 136.49

— 132.28

{ 77.48  
77.16  
76.84 }

— 52.17

{ 24.33  
21.99  
20.58 }

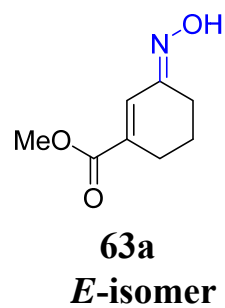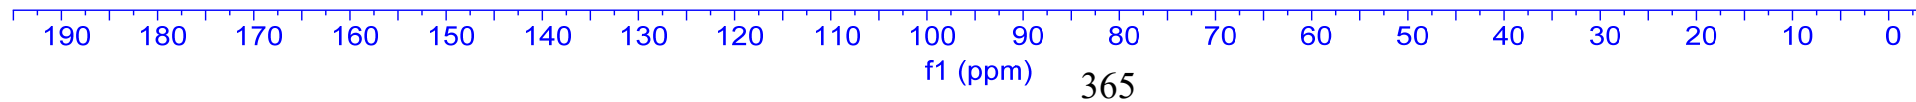

365

<sup>1</sup>H NMR, 400 MHz, CDCl<sub>3</sub>

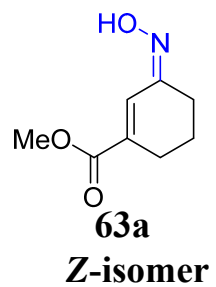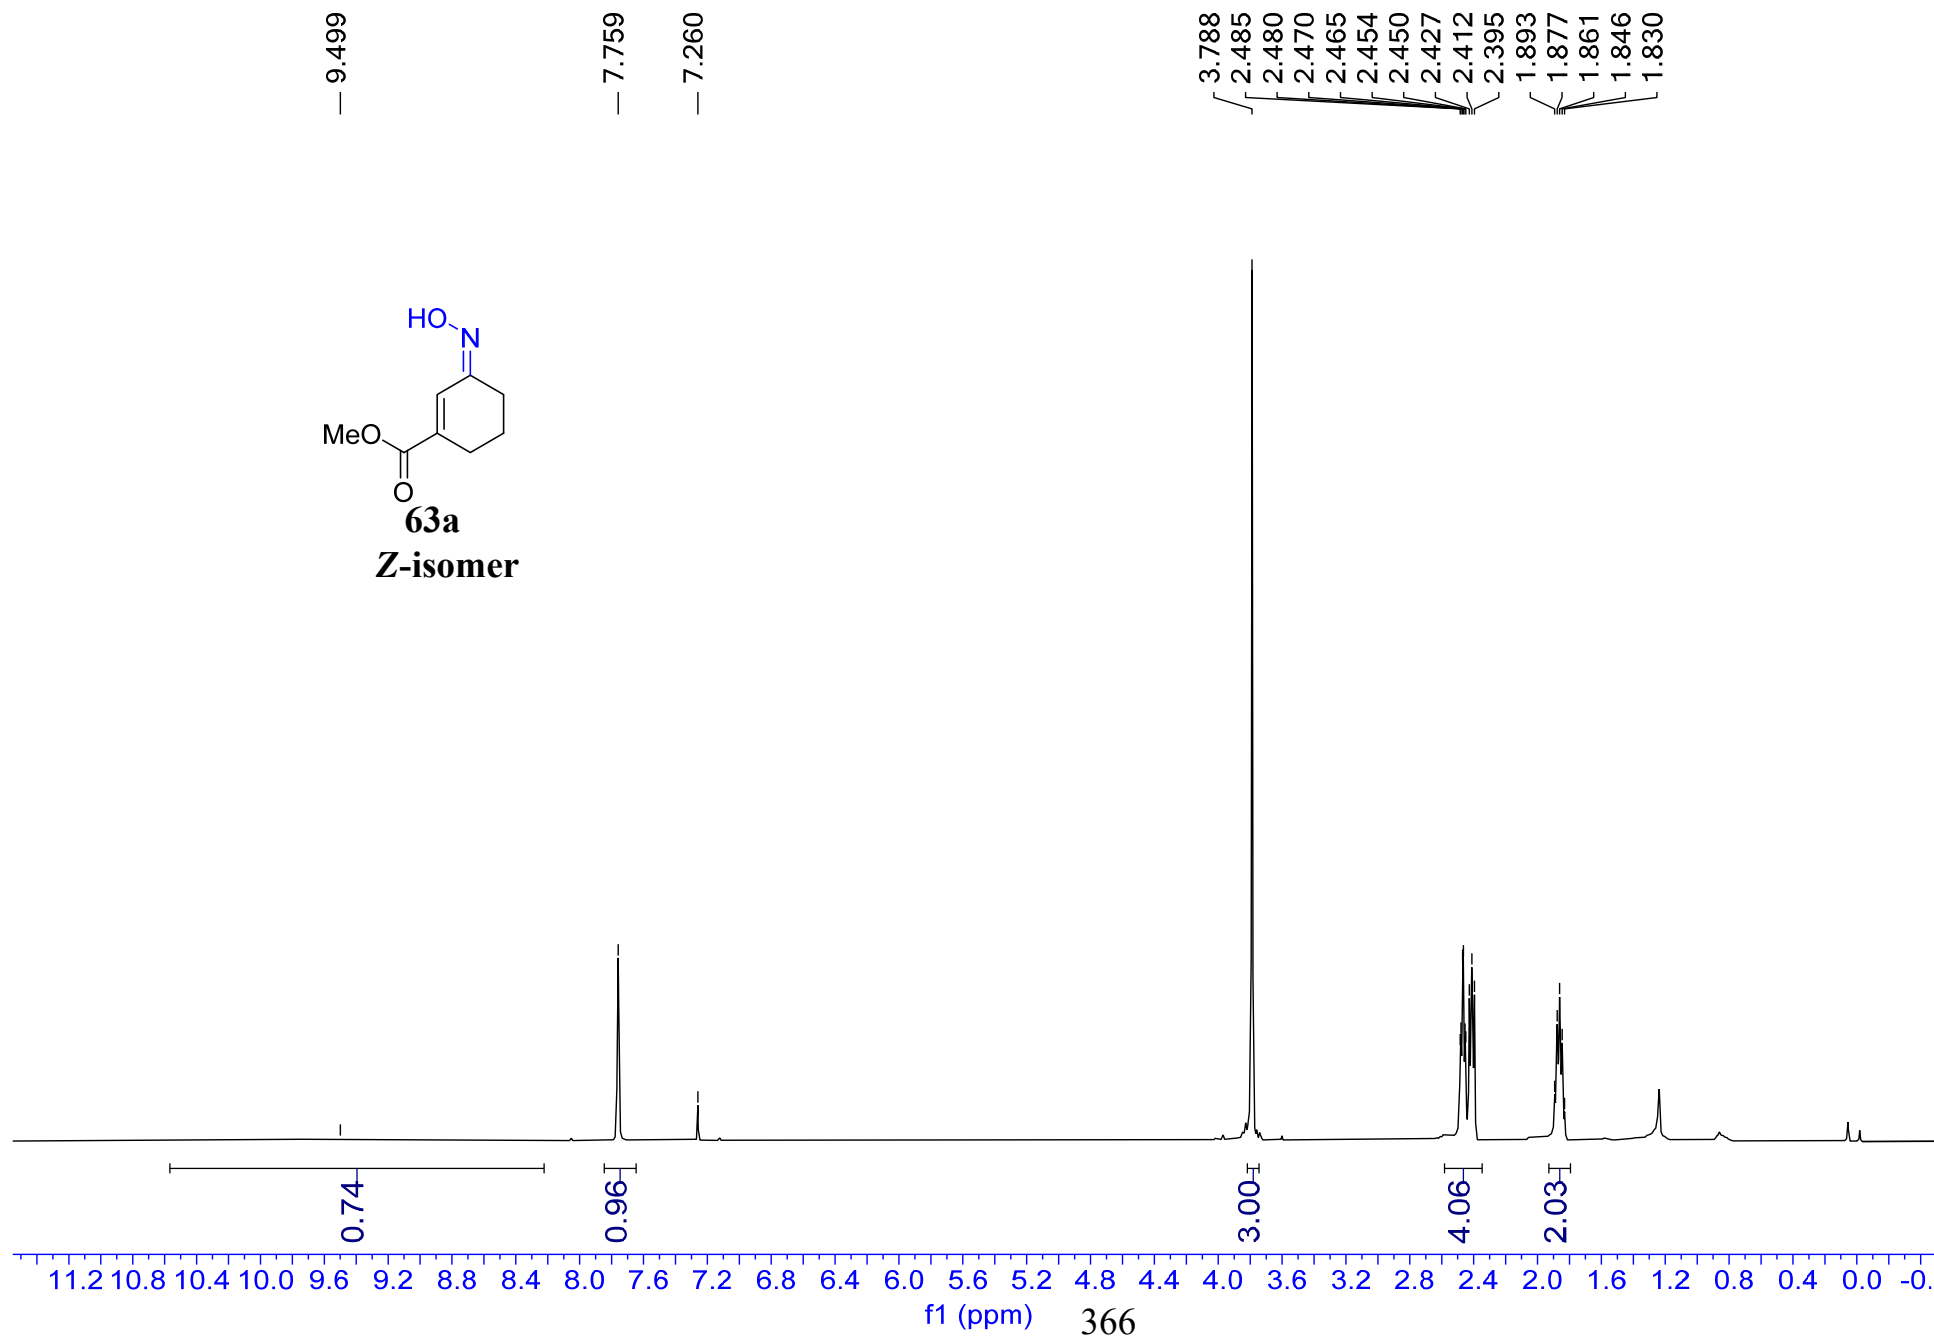

$^{13}\text{C}$  NMR 101 MHz,  $\text{CDCl}_3$

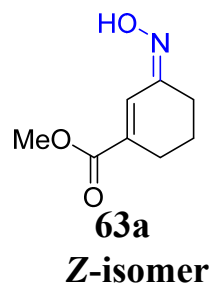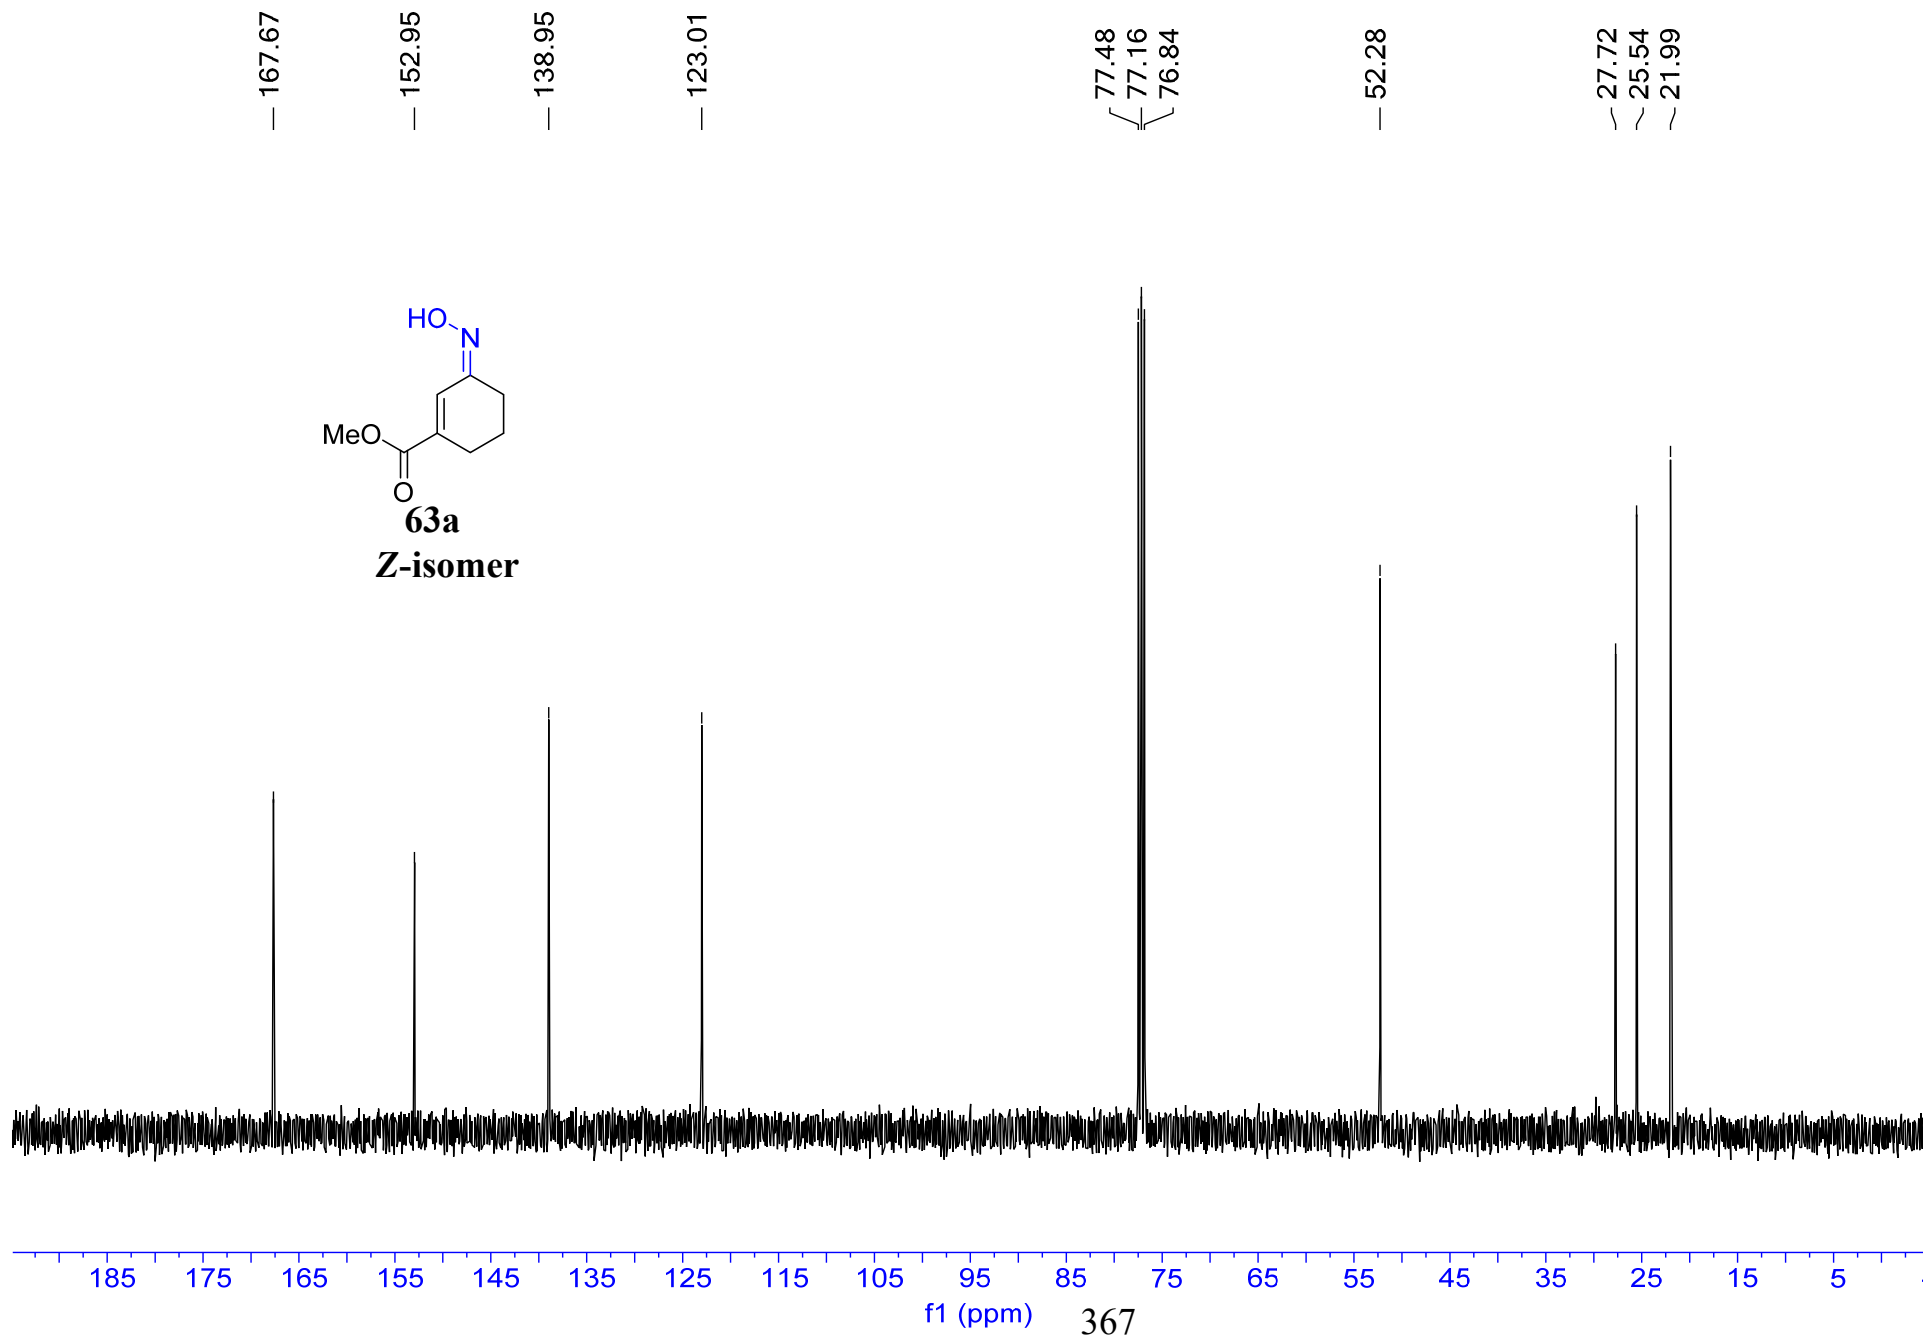

<sup>1</sup>H NMR, 400 MHz, DMSO-d<sub>6</sub>

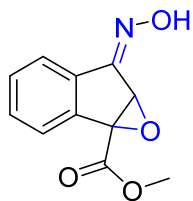

**64a**  
*E/Z*=29:1

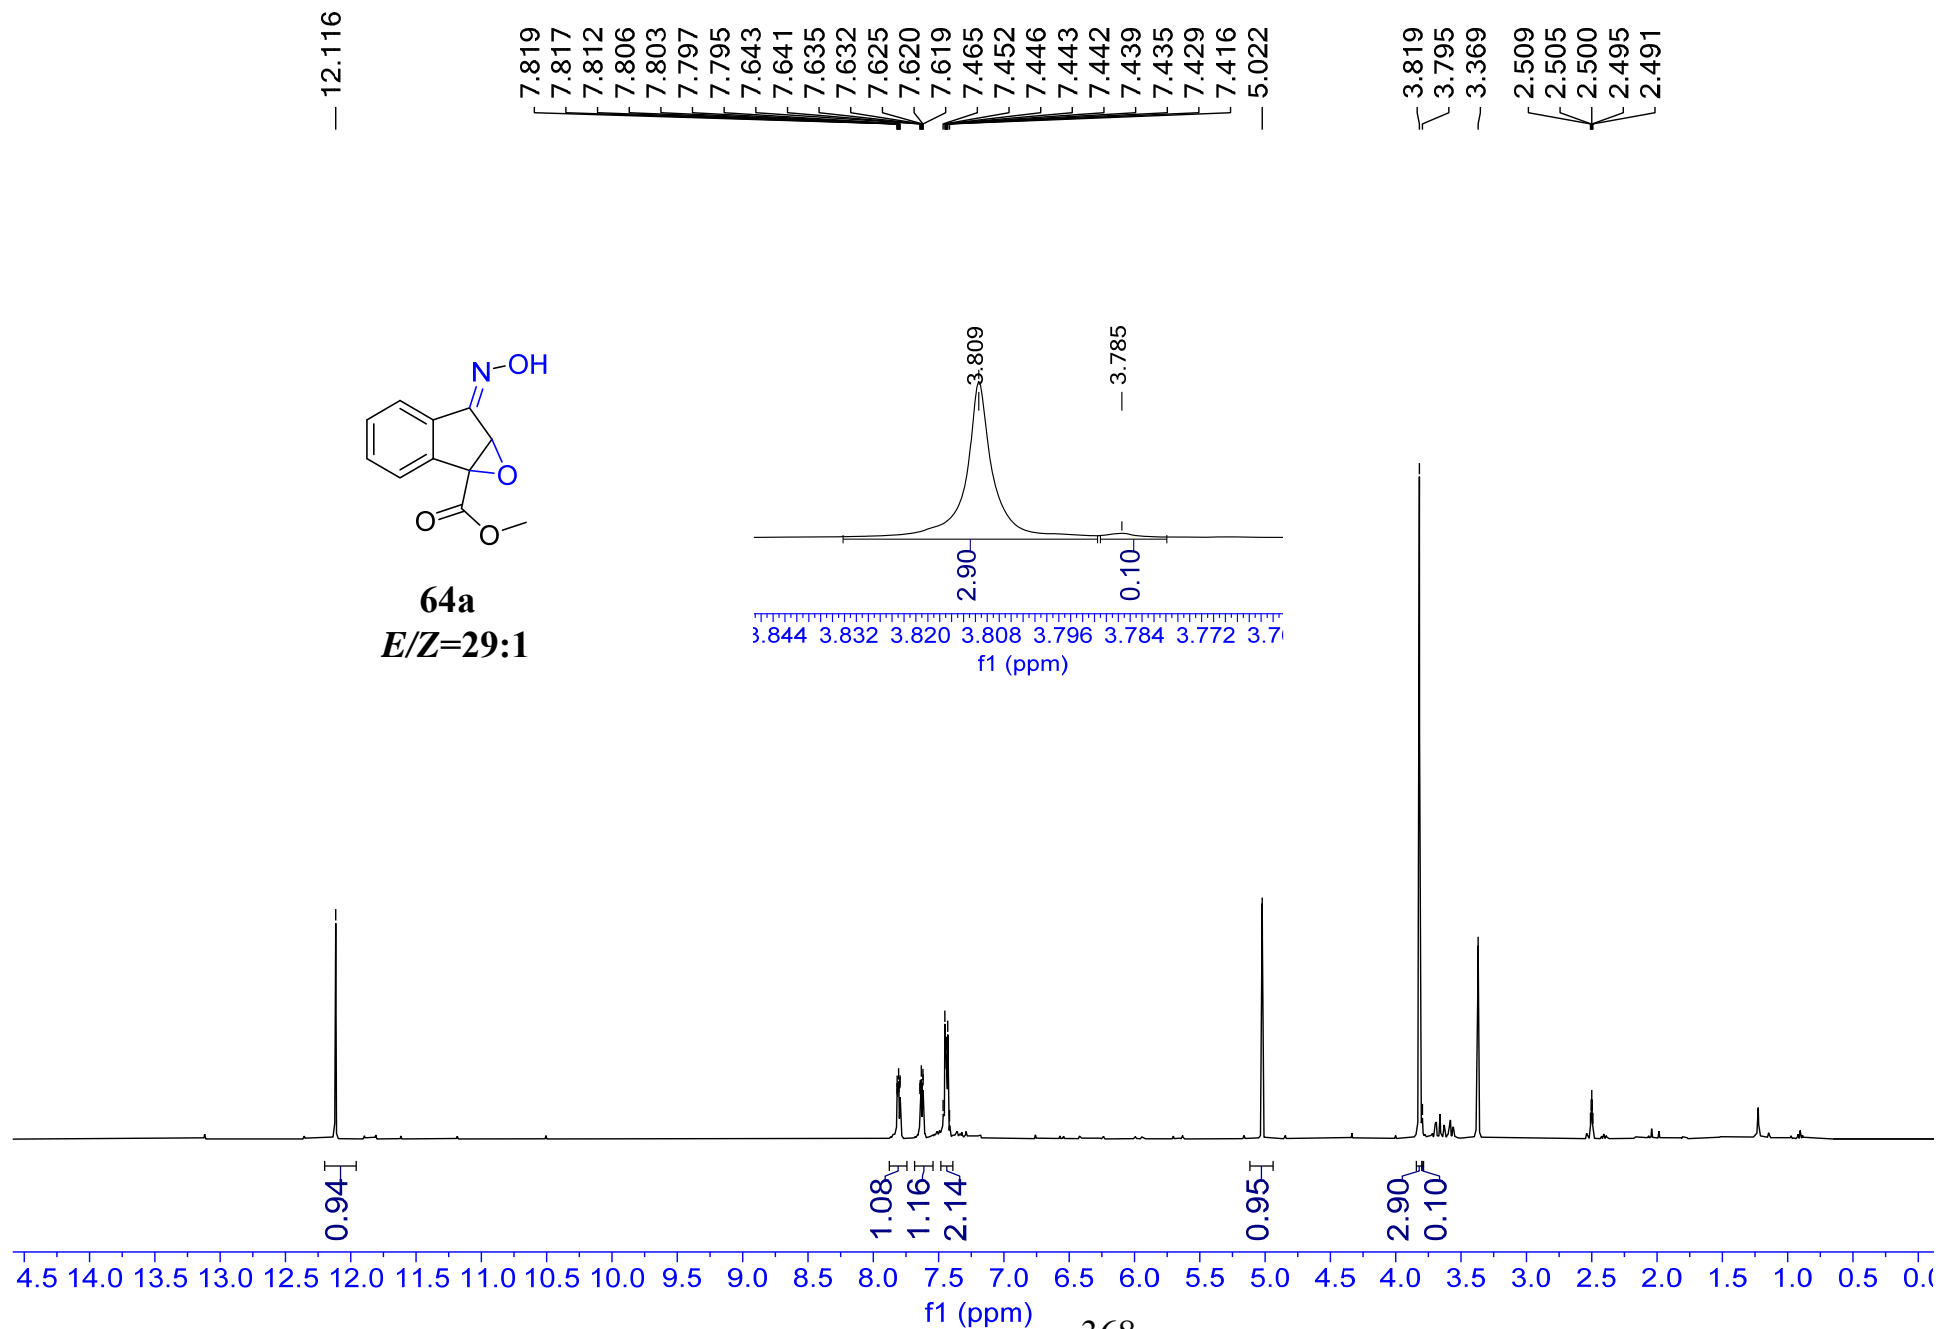

<sup>13</sup>C NMR 101 MHz, DMSO-d<sub>6</sub>

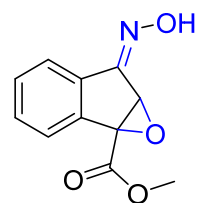

**64a**  
*E/Z*=29:1

— 166.02

— 151.87

~ 138.57  
~ 136.22

~ 129.82  
~ 129.57  
~ 126.73  
~ 121.72

~ 61.11  
~ 55.28  
~ 52.87

39.94  
39.73  
39.52  
39.31  
39.10

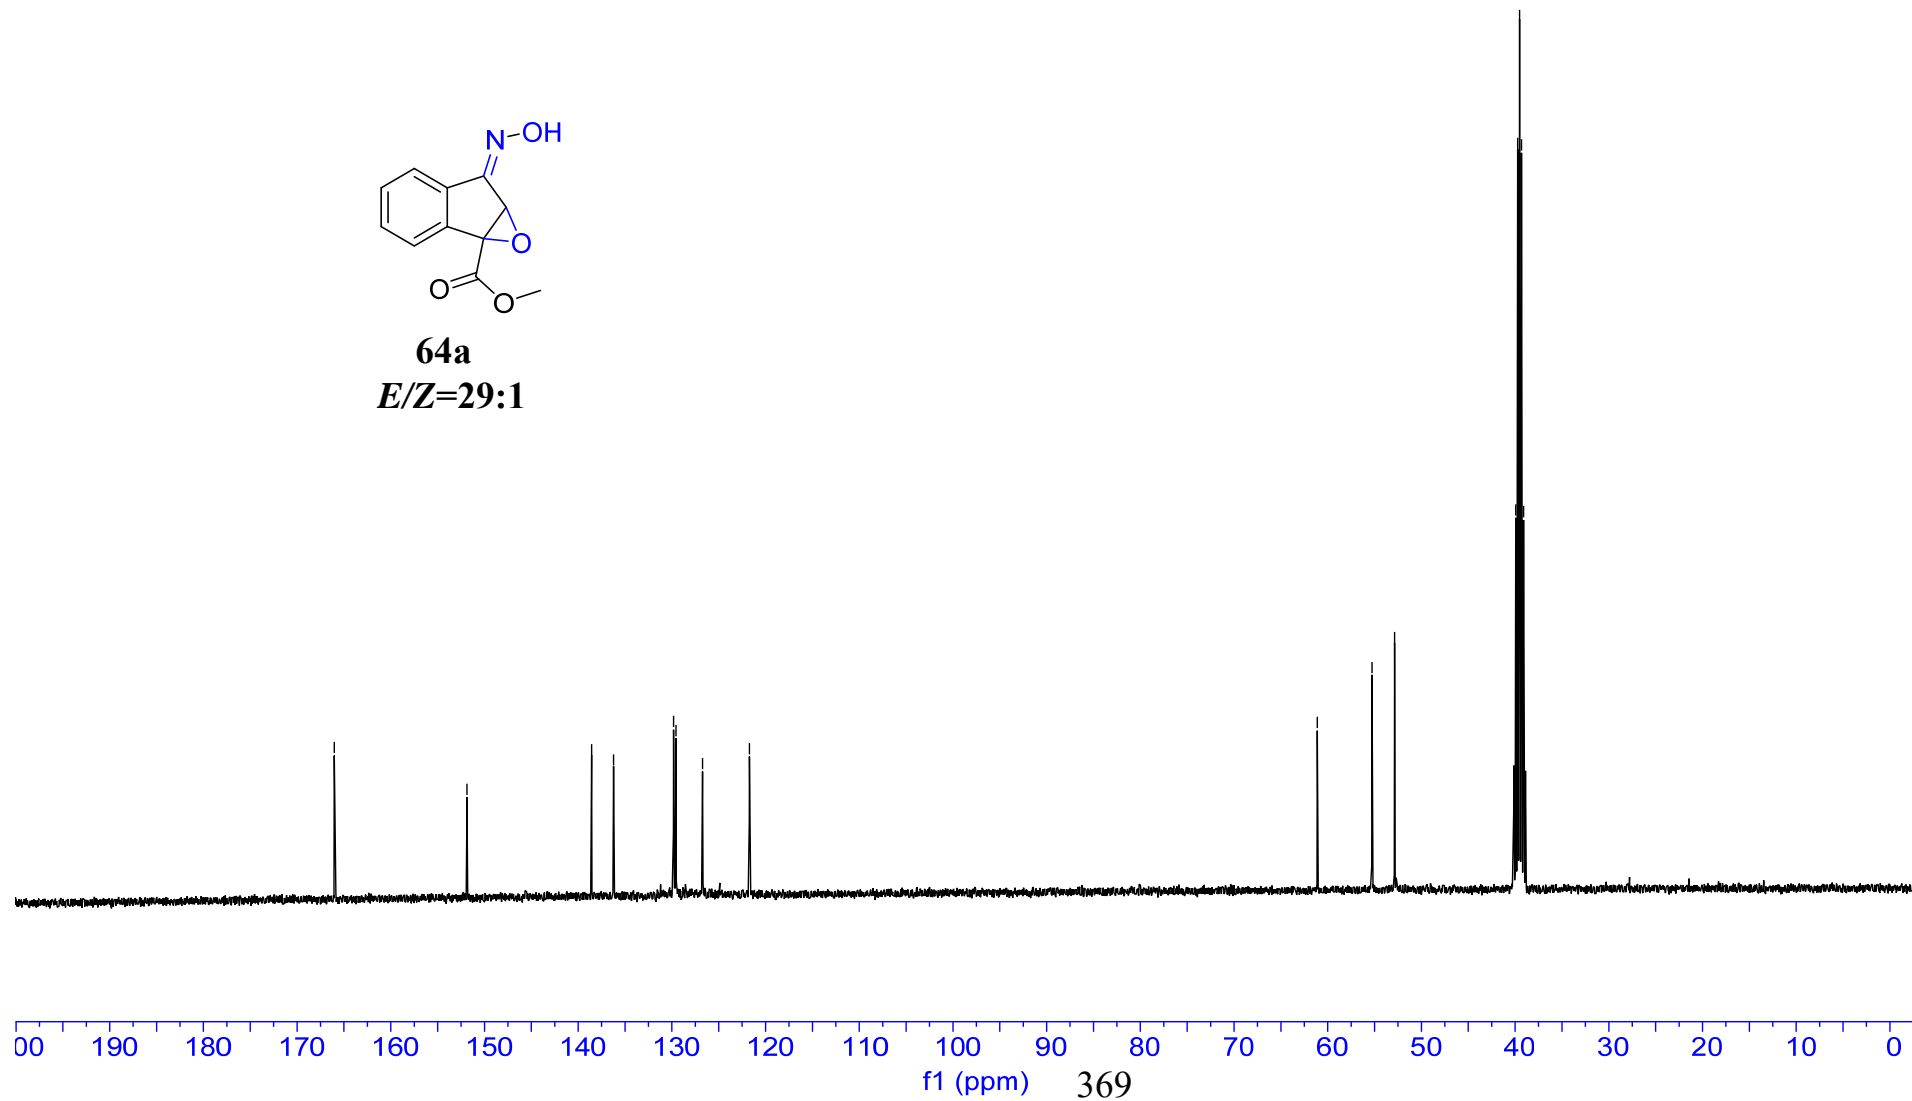

<sup>1</sup>H NMR, 400 MHz, CDCl<sub>3</sub>

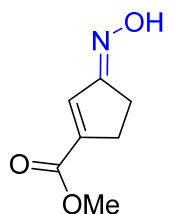

**65a**

*E*-isomer

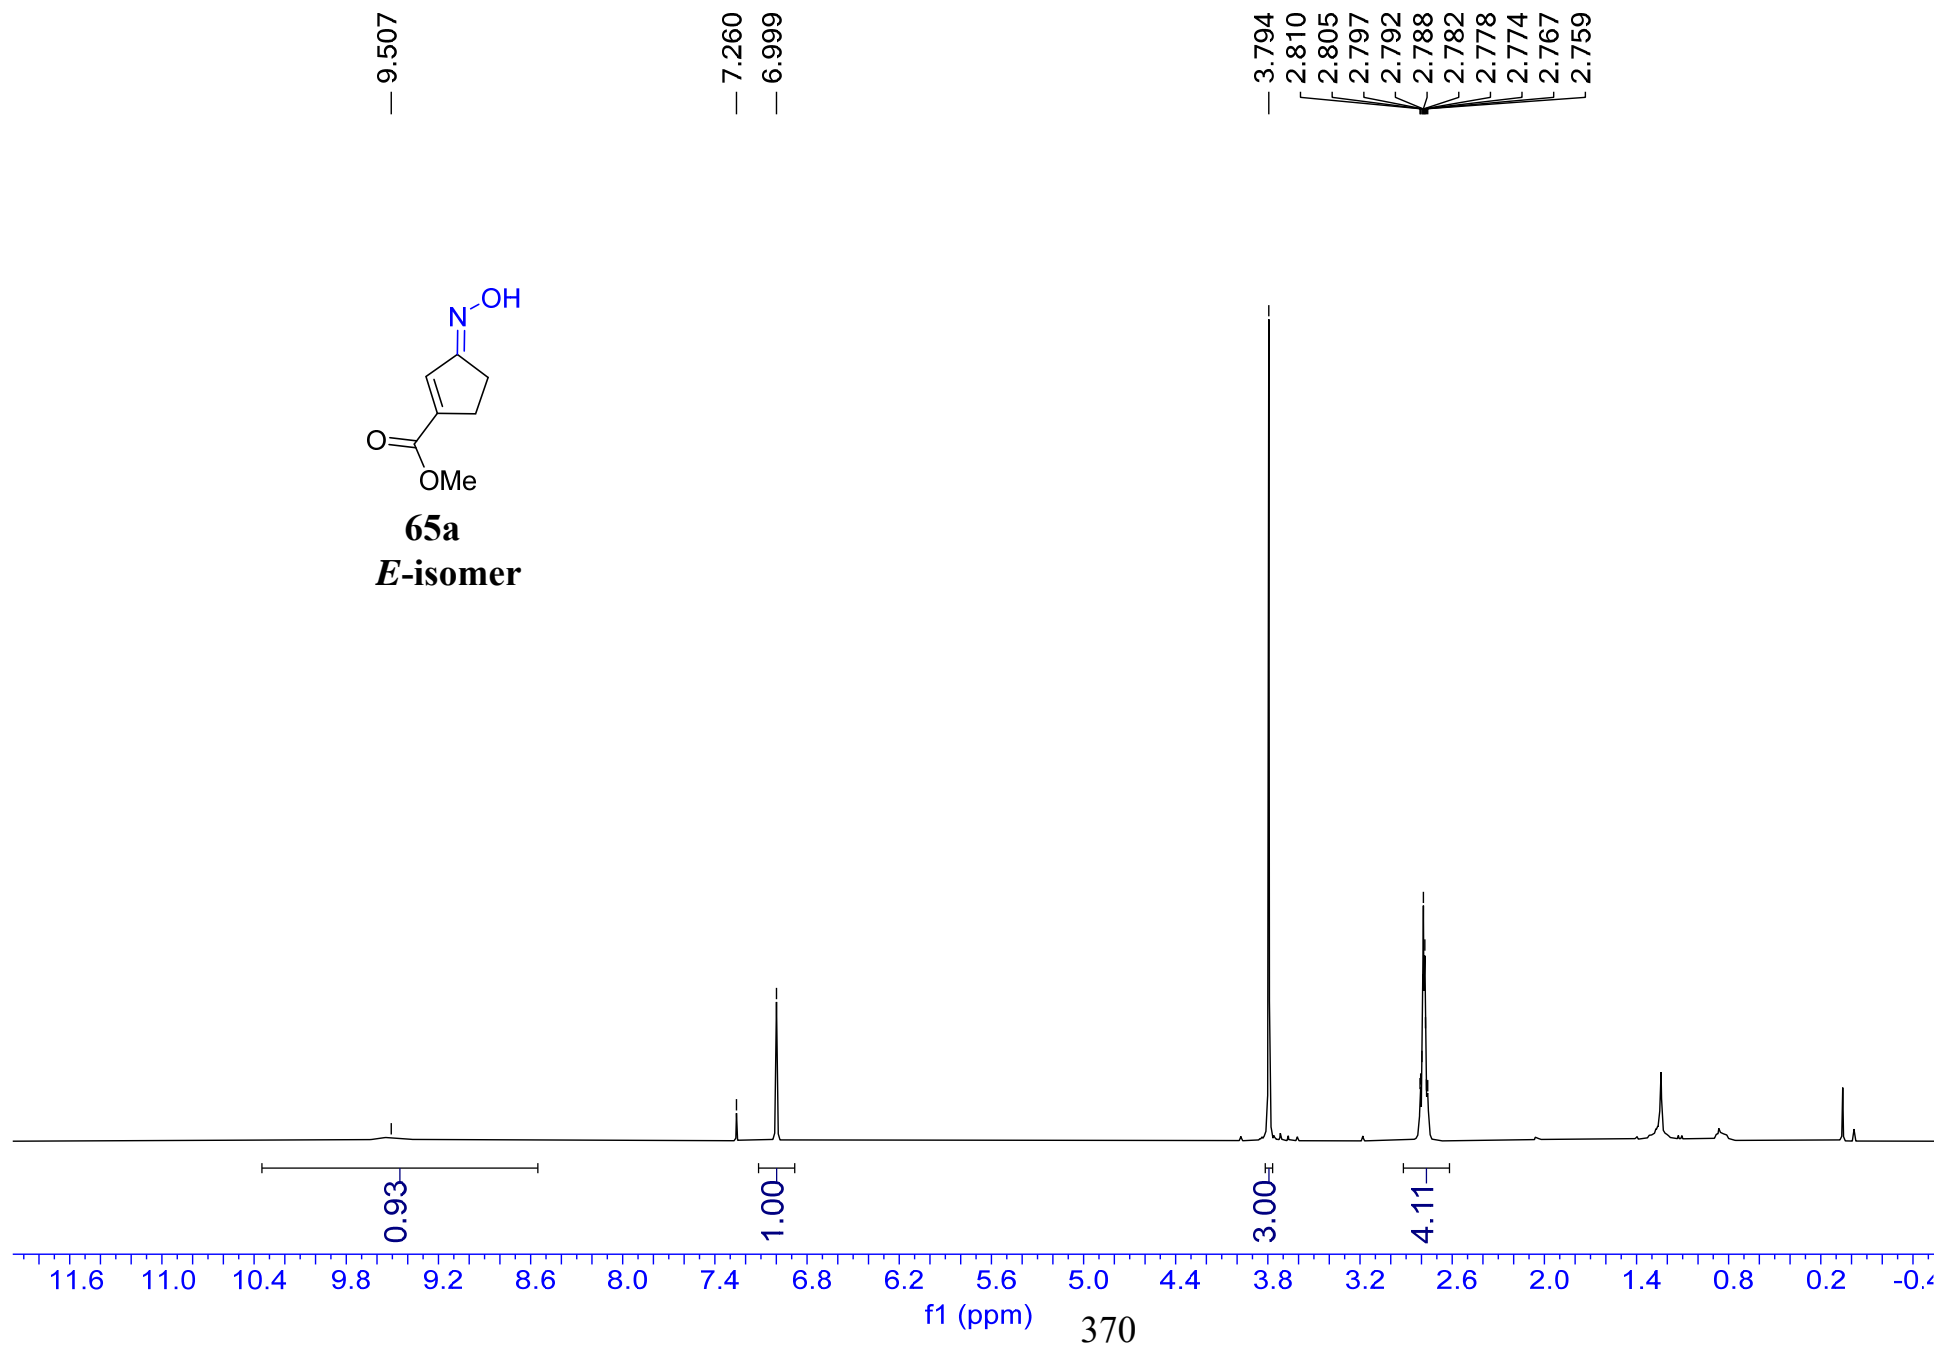

$^{13}\text{C}$  NMR 101 MHz,  $\text{CDCl}_3$



**65a**

*E*-isomer

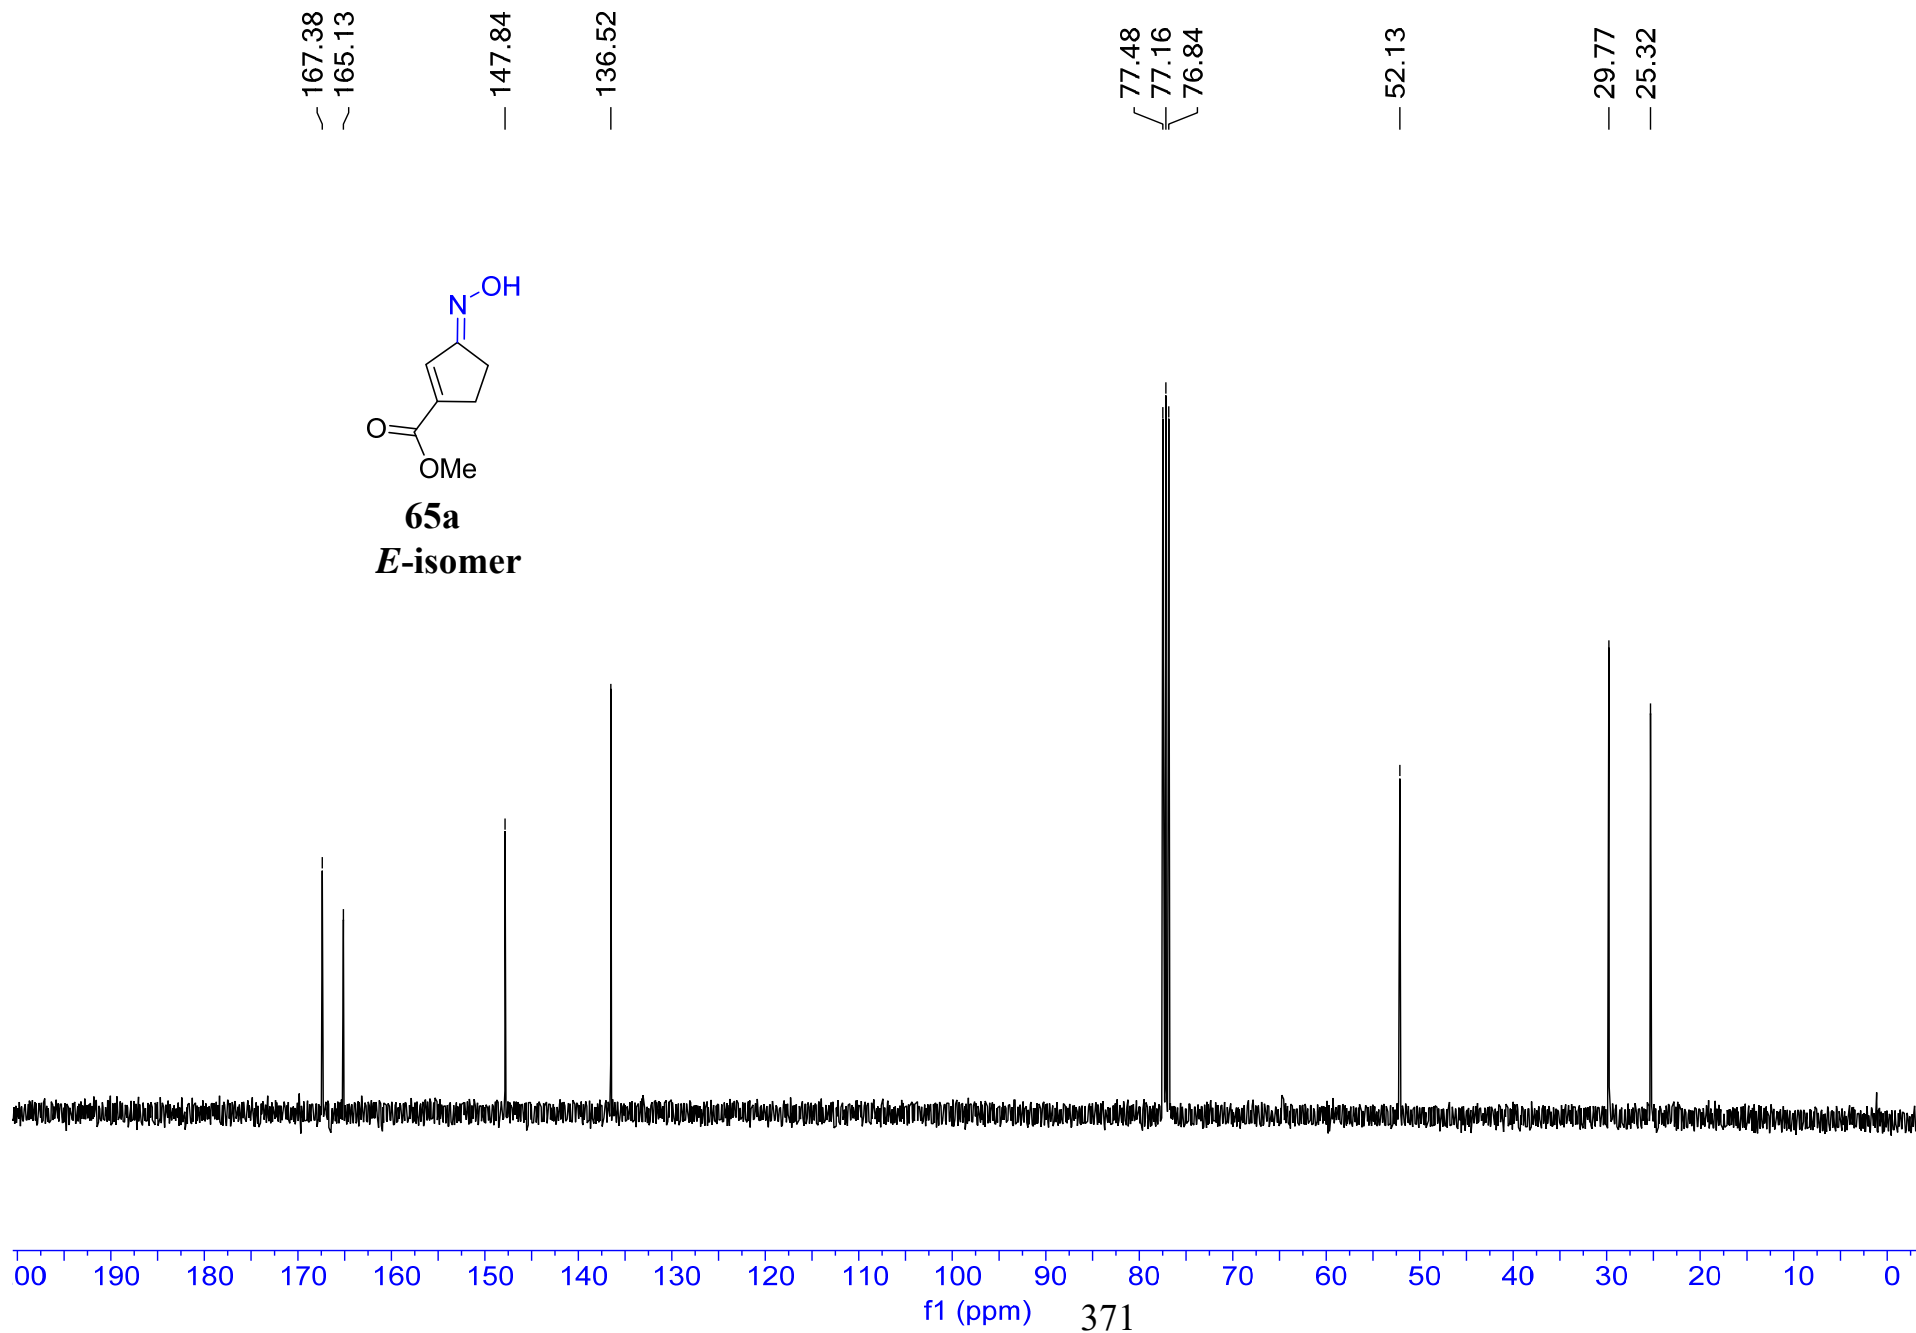

<sup>1</sup>H NMR, 400 MHz, CDCl<sub>3</sub>

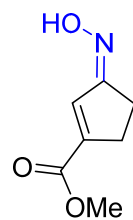

**65a**

**Z-isomer**

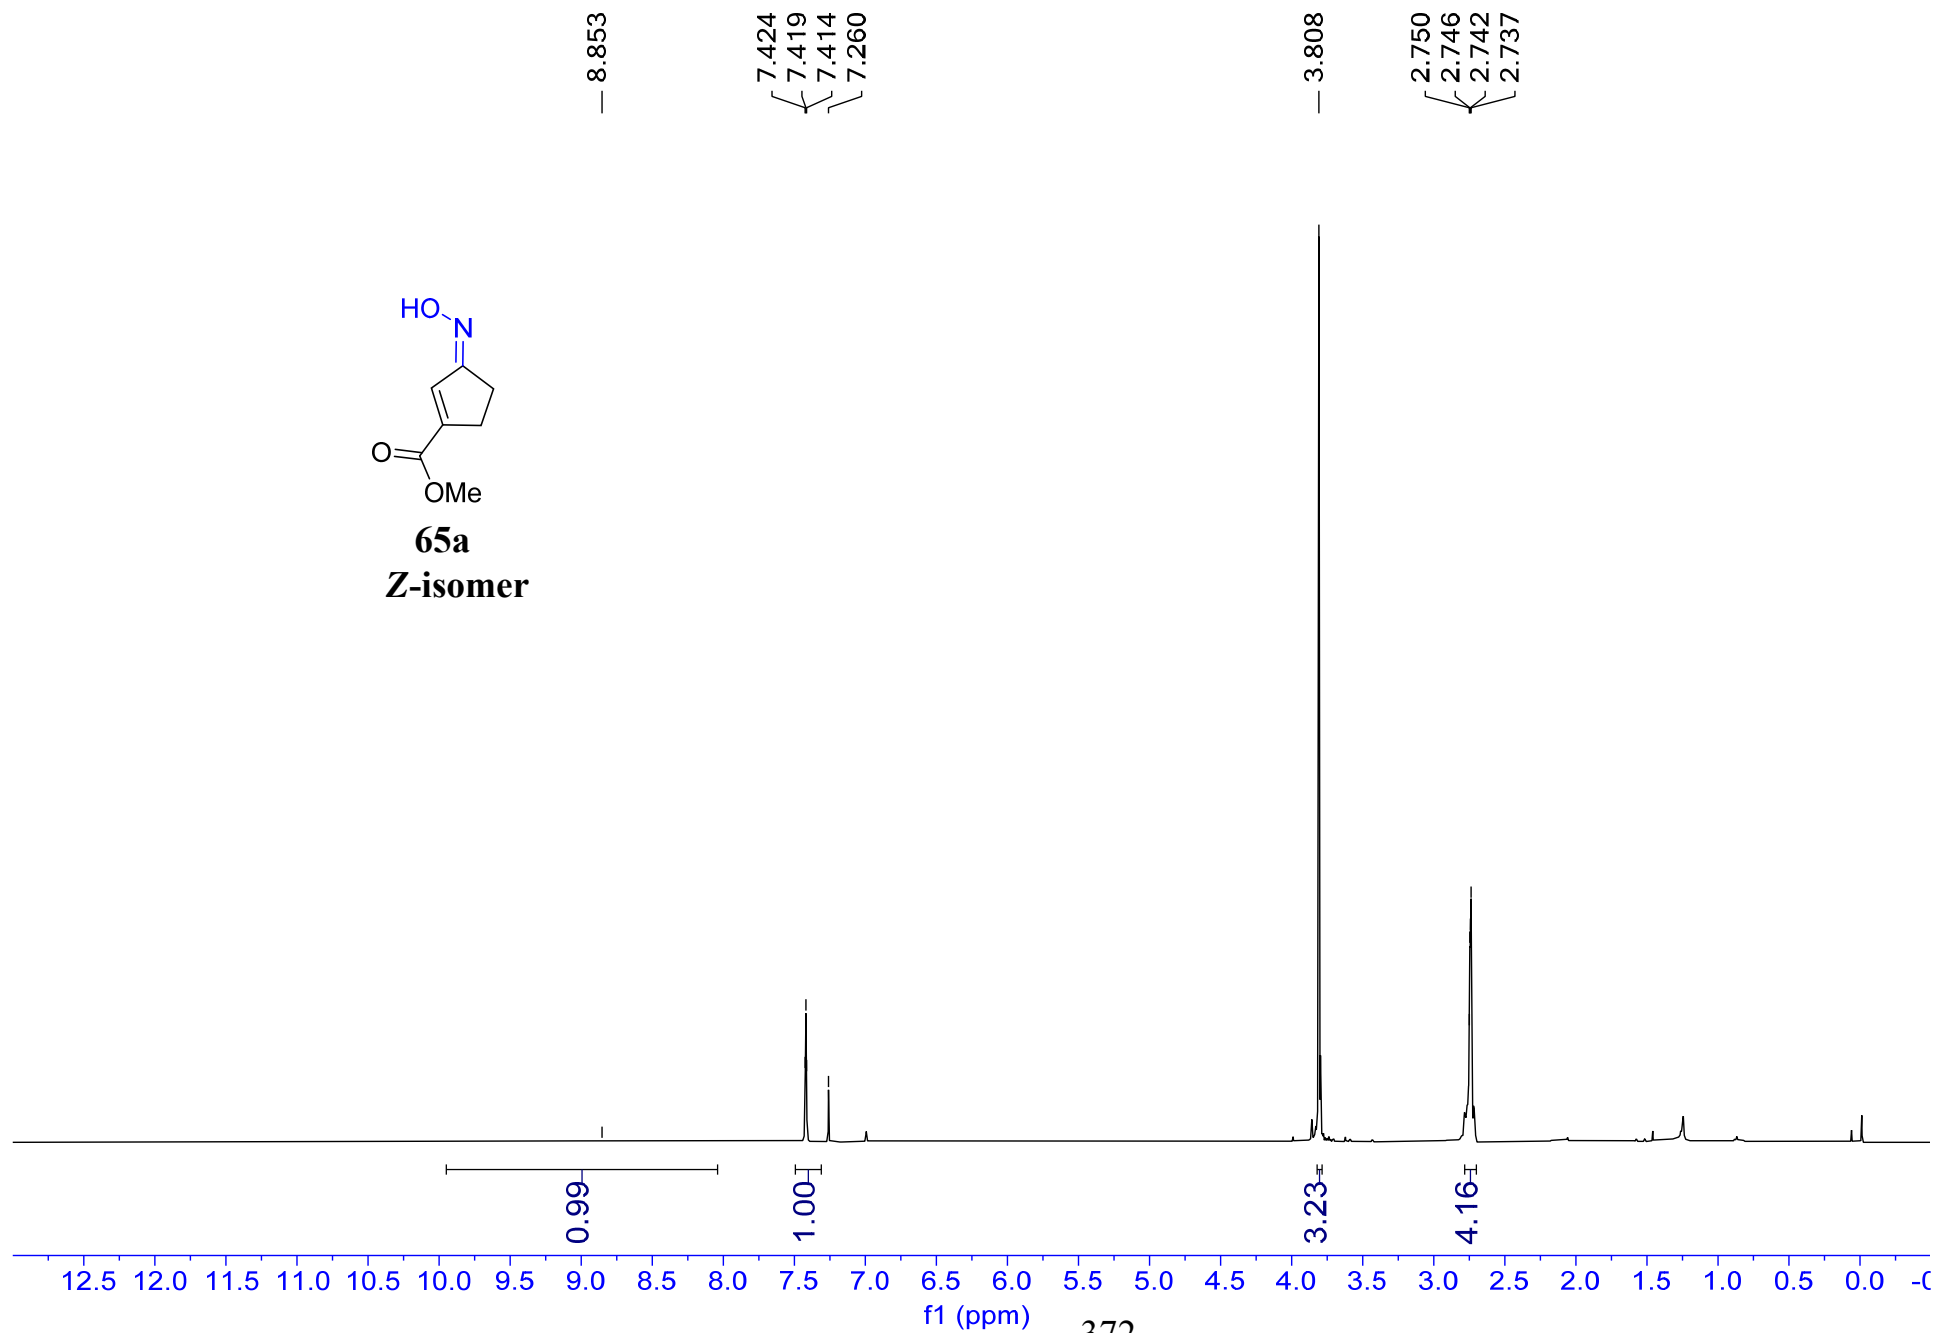



$^{13}\text{C}$  NMR 101 MHz,  $\text{CDCl}_3$

~ 165.50  
~ 164.10

— 148.82

— 129.72

77.48  
77.16  
76.85

— 52.26

~ 28.96  
~ 26.95

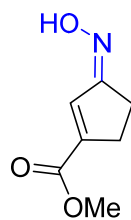

**65a**  
**Z-isomer**

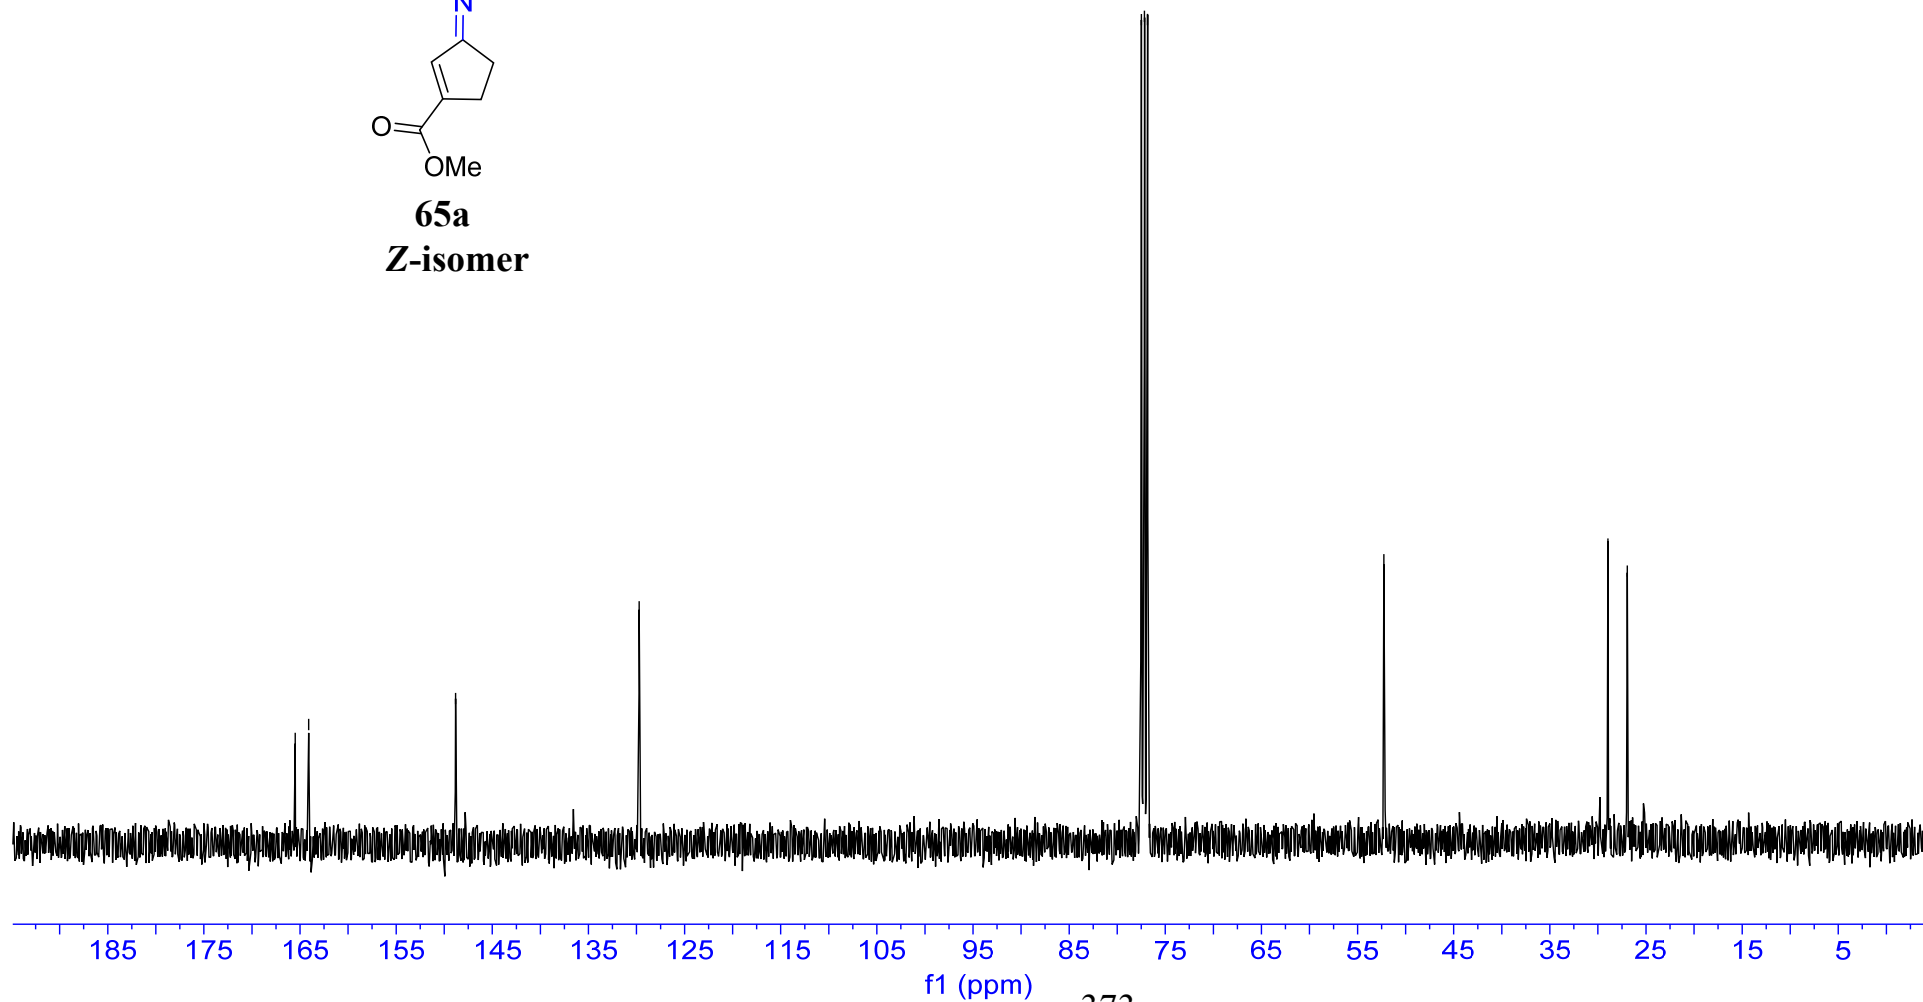

373

<sup>1</sup>H NMR, 400 MHz, DMSO-d<sub>6</sub>

— 11.577  
— 11.235

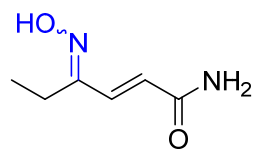

**66a**

(2*E*,4*E*)/(2*E*,4*Z*)=3:1

7.650  
7.571  
7.560  
7.530  
7.245  
7.150  
6.913  
6.873  
6.382  
6.351  
6.341  
6.311

3.359  
2.509  
2.505  
2.500  
2.495  
2.491  
2.449  
2.430  
2.411  
2.392  
2.387  
2.368  
2.350  
2.331  
1.084  
1.065  
1.046  
1.008  
0.989  
0.970

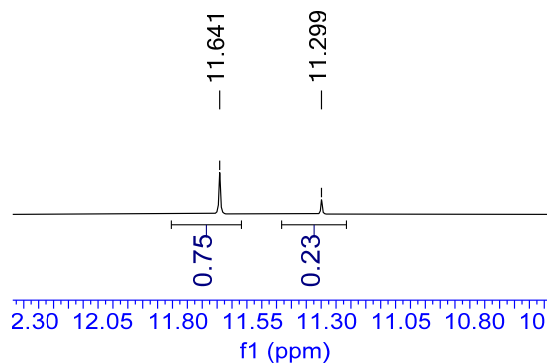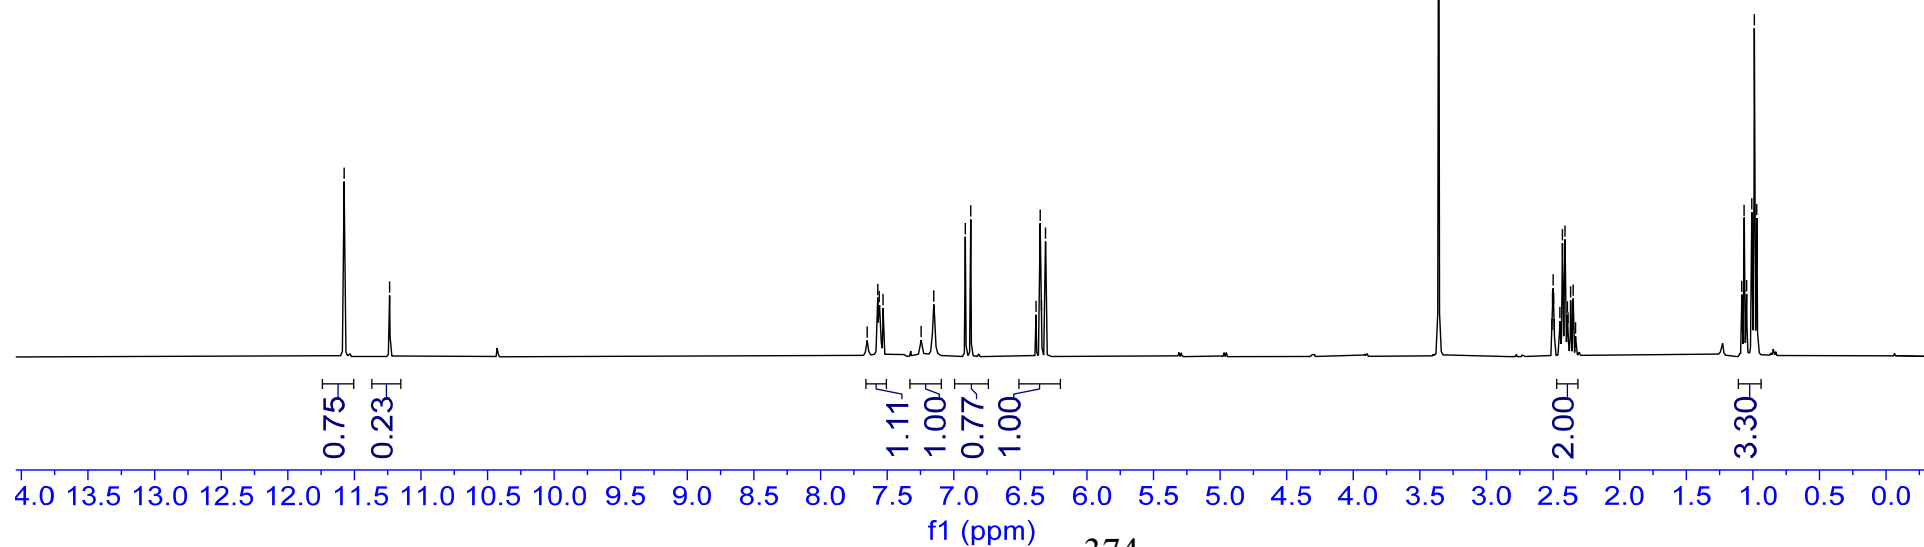

<sup>13</sup>C NMR 101 MHz, DMSO-d<sub>6</sub>

166.16  
166.07

157.75  
153.21

135.82

127.22  
125.65  
124.70

39.62  
39.41  
39.20  
38.99  
38.78

23.53

16.77  
11.46  
10.33



**66a**

(2*E*,4*E*)/(2*E*,4*Z*)=3:1

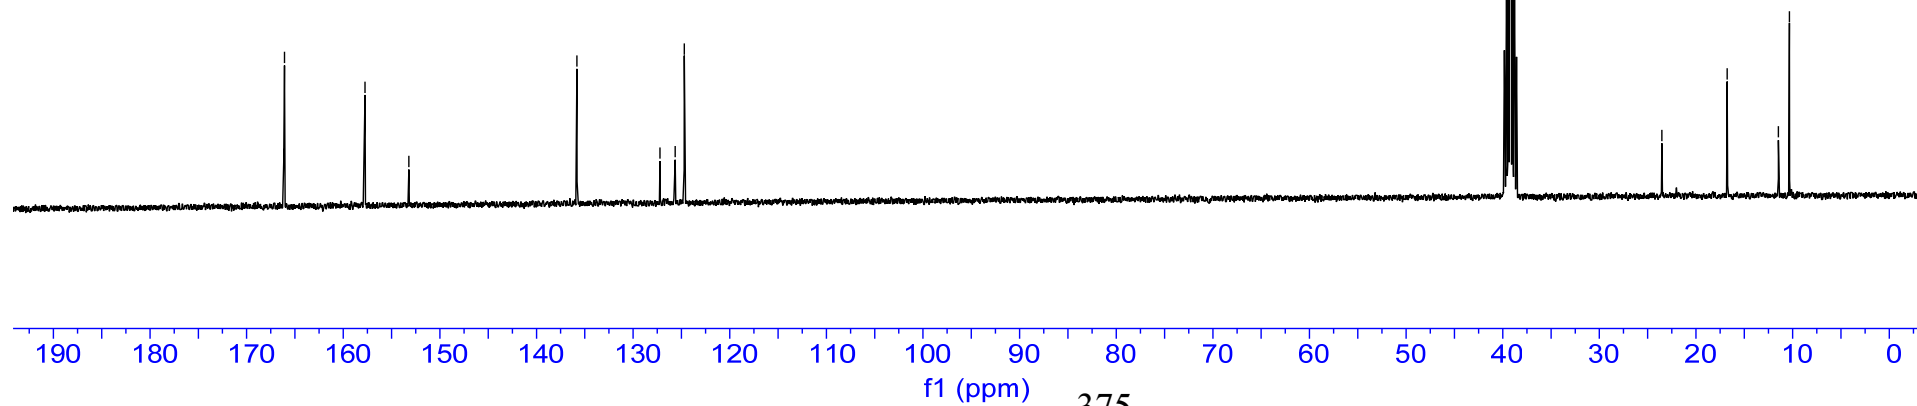

**67a**  
(2*E*,4*E*)/(2*E*,4*Z*)=4:1

CC(C)NC(=O)/C=C/C(=N)CC

**1H NMR (400 MHz, CDCl<sub>3</sub>)**

Chemical structure of 67a is shown. The spectrum displays peaks corresponding to the compound, with integration values provided for several signals.

Integration values (from left to right): 0.79, 0.19, 0.97, 0.20, 0.76, 0.98, 0.99, 1.92, 6.00, 2.26.

Chemical shift range (ppm): 13.0 to 0.0.

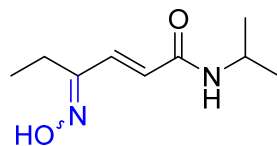

**67a**  
**(2*E*,4*E*)/(2*E*,4*Z*)=4:1**

<sup>13</sup>C NMR 101 MHz, DMSO-d<sub>6</sub>

163.41  
163.31  
157.77  
153.27

134.98  
127.46  
124.95  
124.88

40.32  
40.21  
39.83  
39.62  
39.41  
39.20  
38.99  
38.78  
38.57  
23.55  
22.07  
22.01  
16.79  
11.53  
10.34

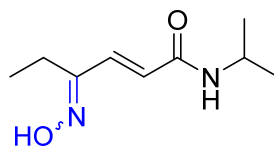

**67a**

(2*E*,4*E*)/(2*E*,4*Z*)=4:1

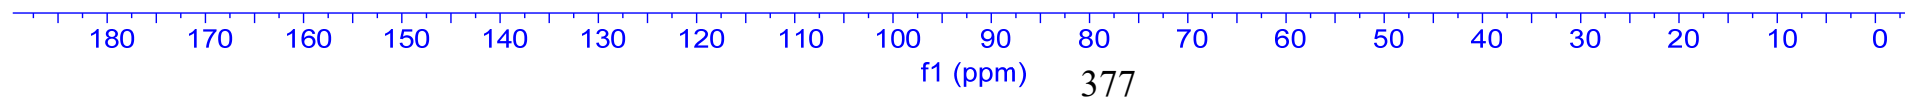

<sup>1</sup>H NMR, 400 MHz, DMSO-d<sub>6</sub>

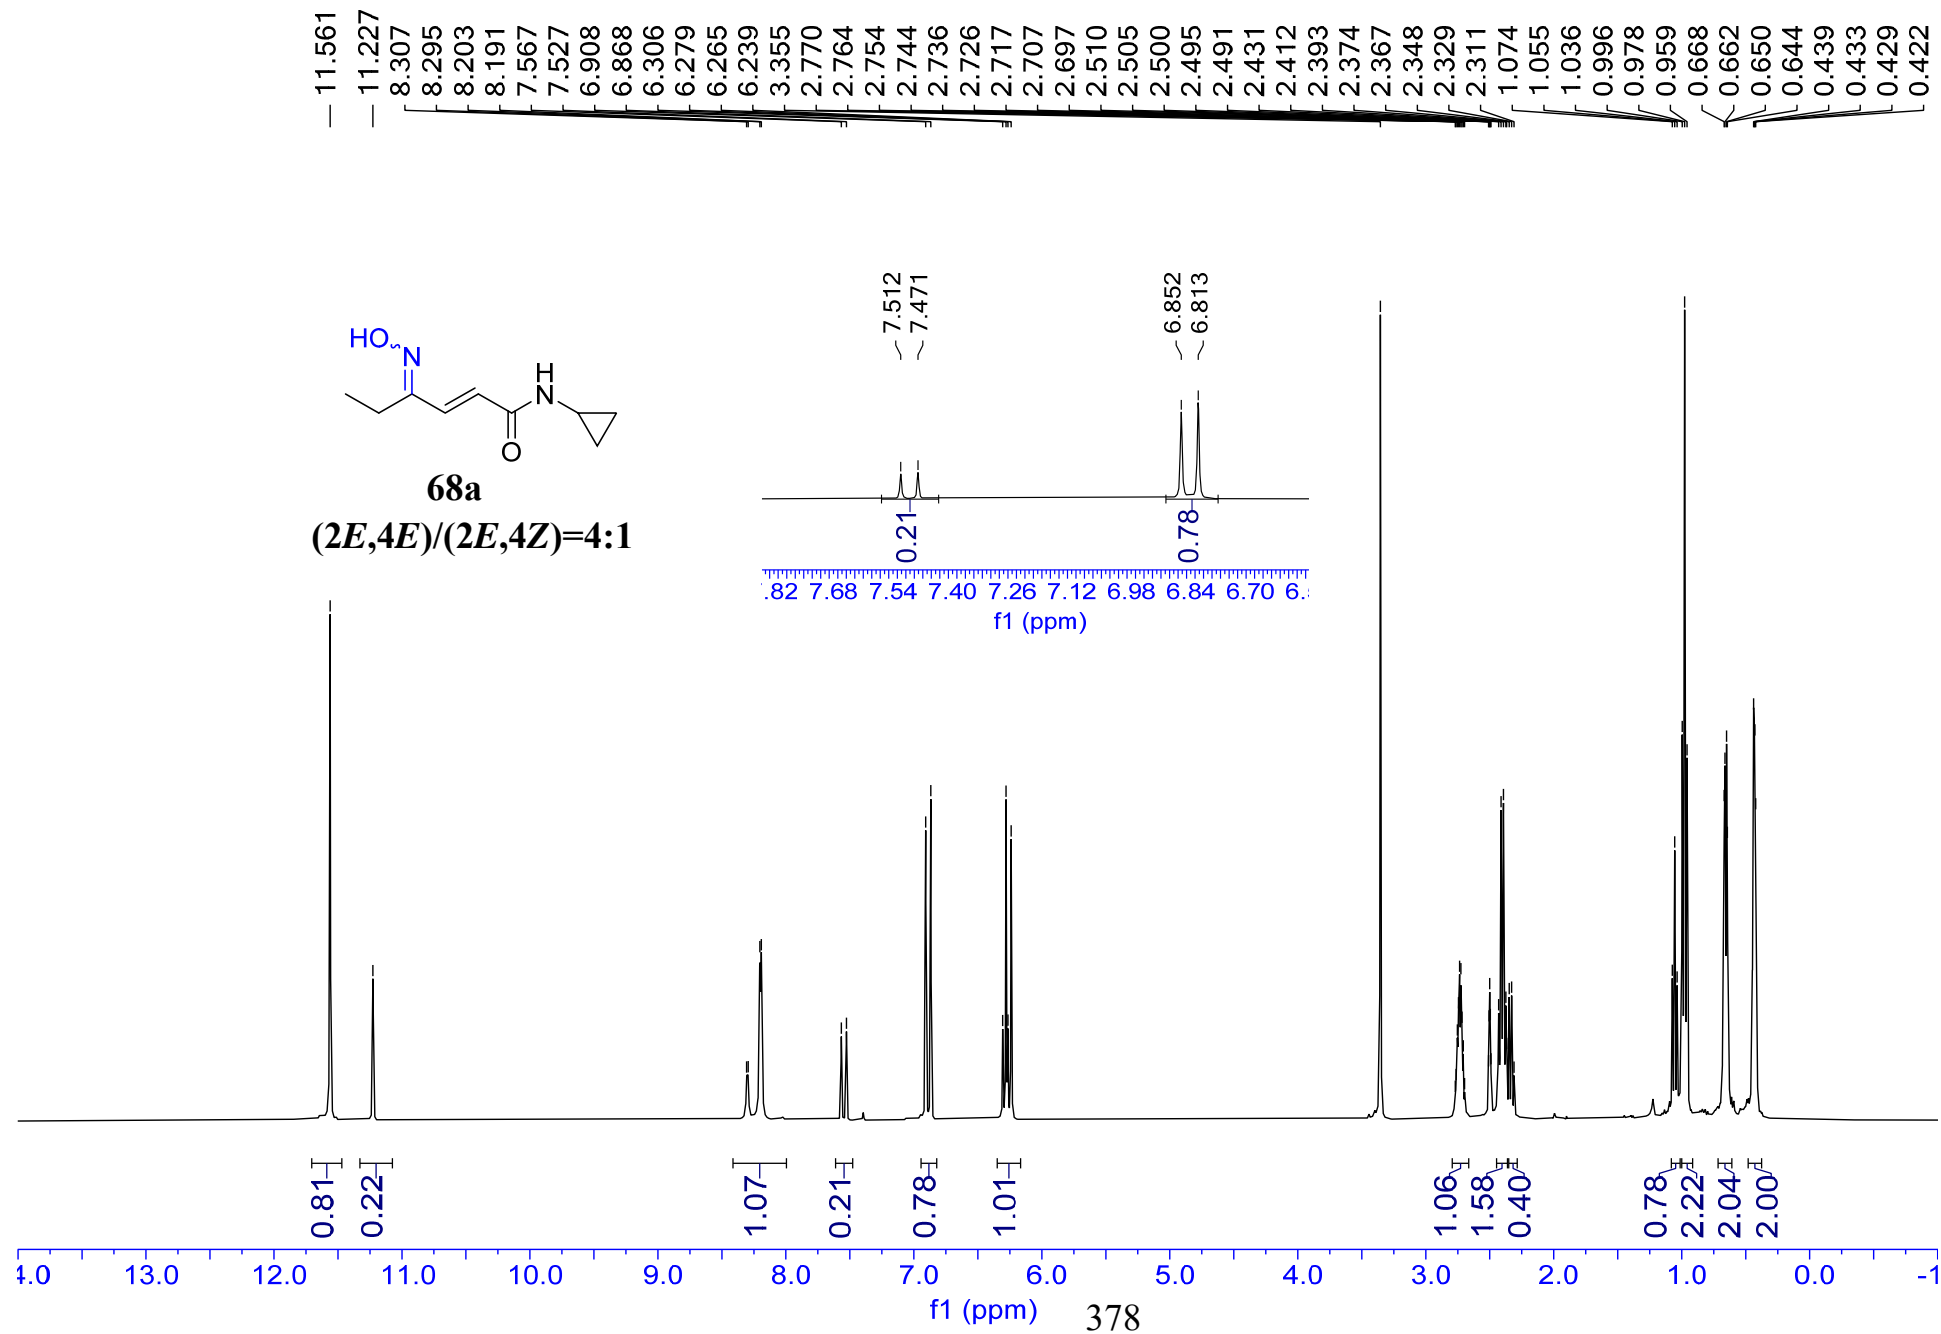

<sup>13</sup>C NMR 101 MHz, DMSO-d<sub>6</sub>

165.46  
165.36

157.68  
153.16

134.99

126.87  
124.86  
124.34

39.82  
39.62  
39.41  
39.20  
38.99  
38.78  
38.57

23.50  
22.23  
22.15  
16.74  
11.44  
10.26  
5.48

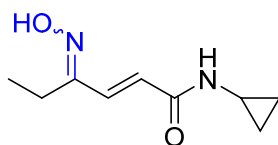

**68a**

(2E,4E)/(2E,4Z)=4:1

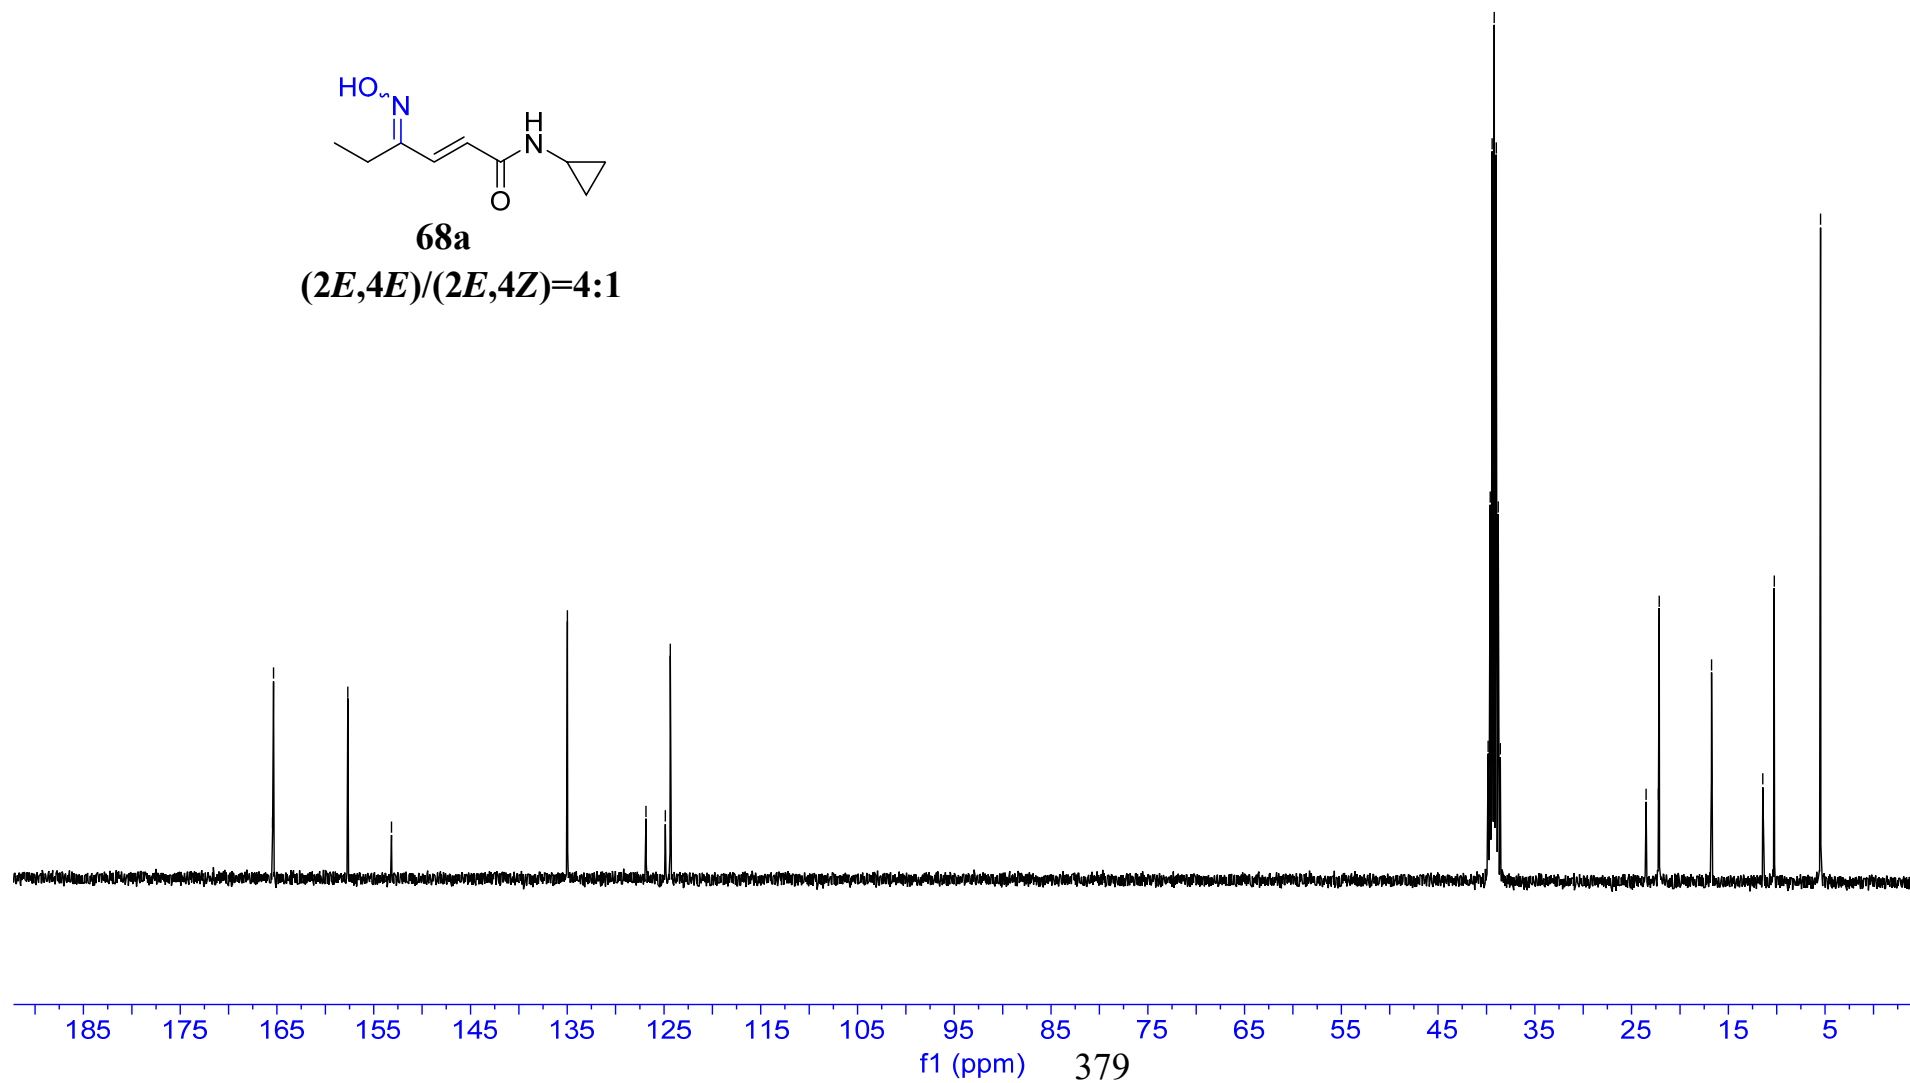

<sup>1</sup>H NMR, 400 MHz, CDCl<sub>3</sub>

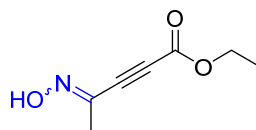

**69a**  
*E/Z* = 1:1

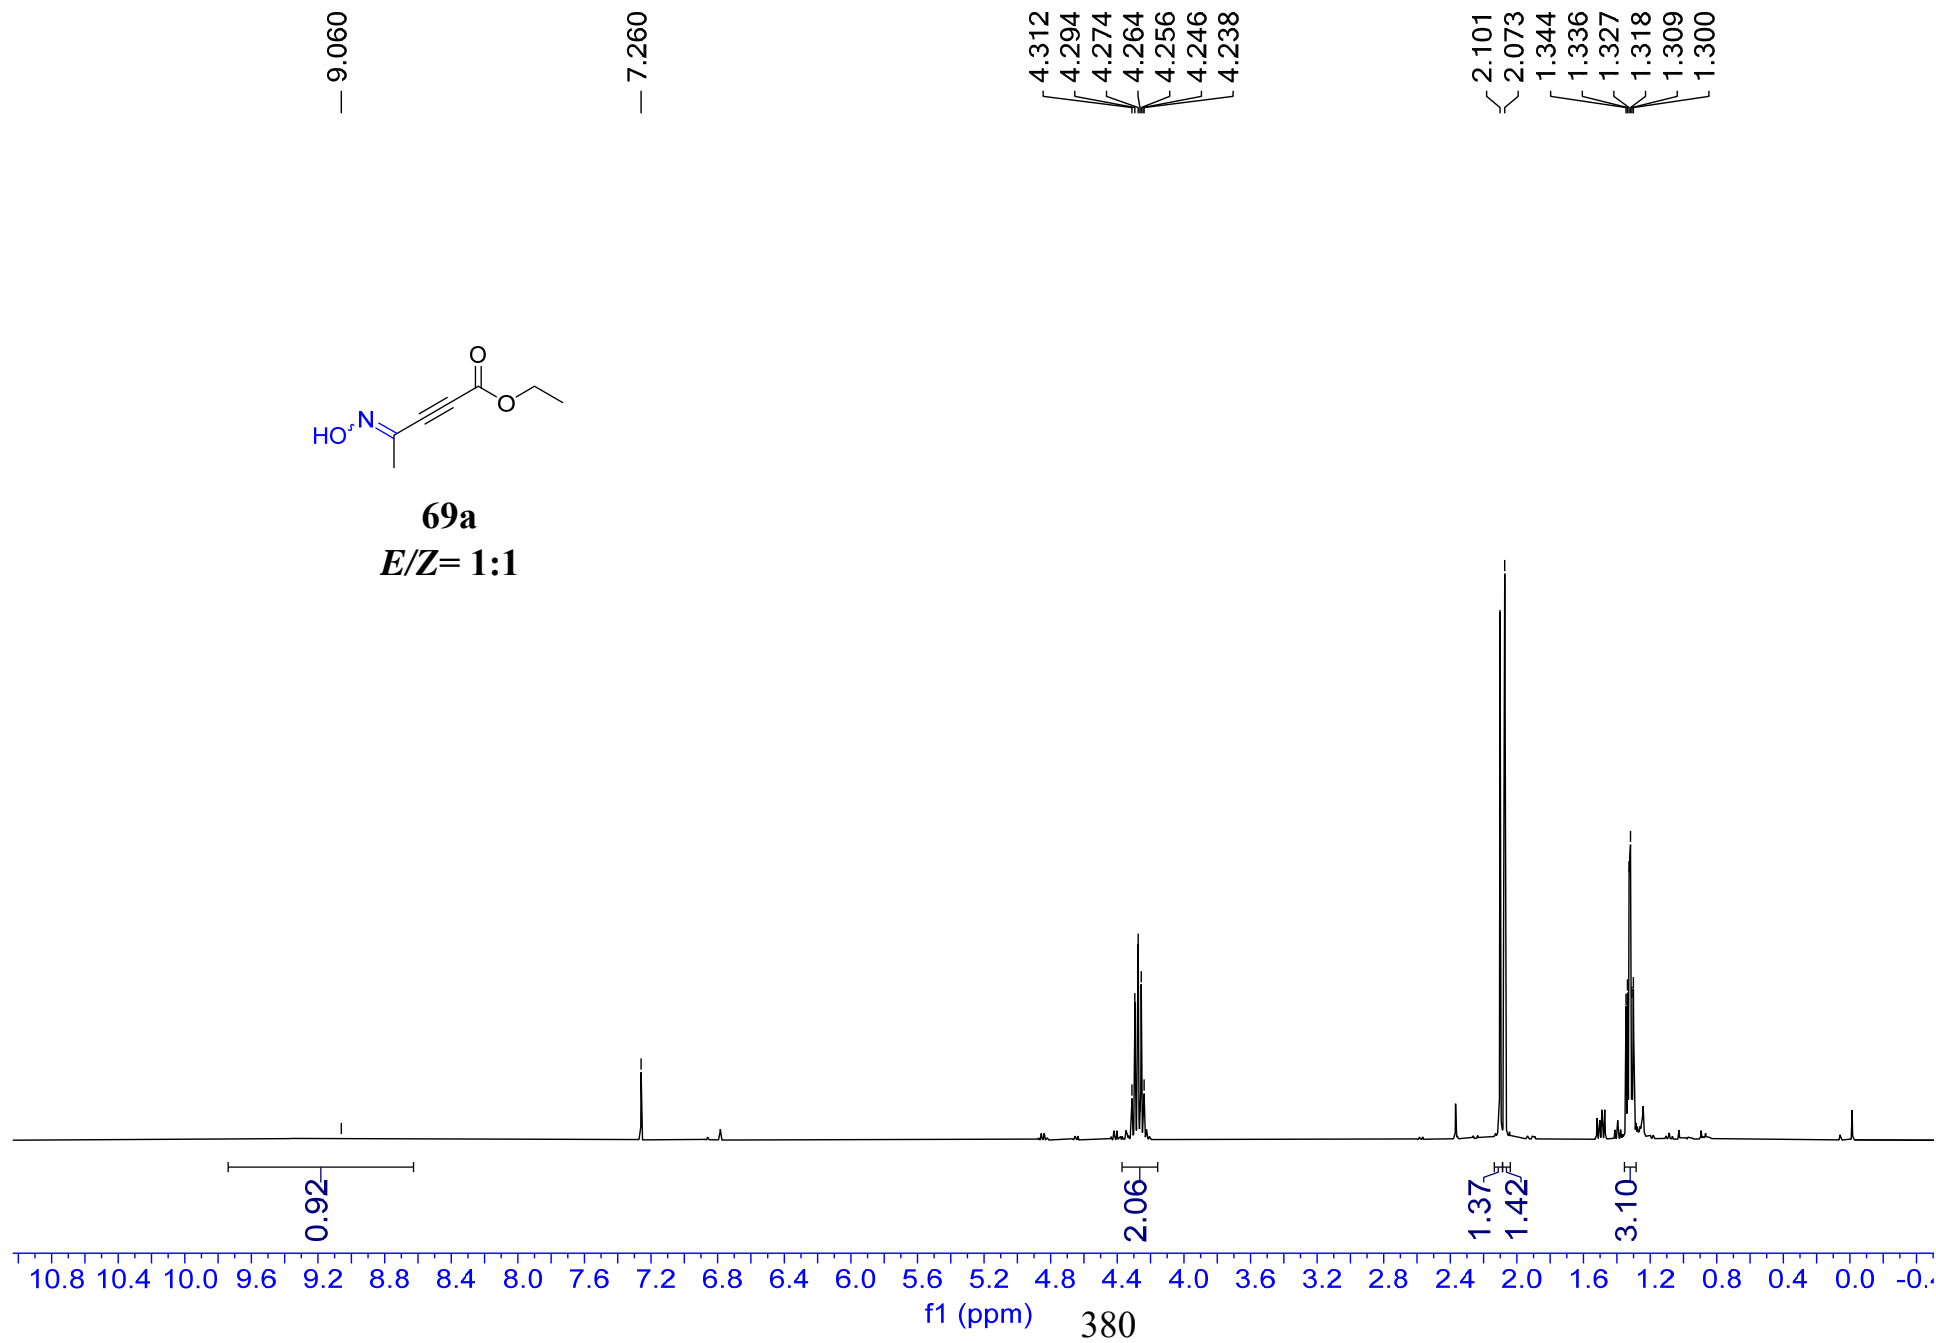



<sup>13</sup>C NMR 101 MHz, CDCl<sub>3</sub>



**69a**  
*E/Z*= 1:1

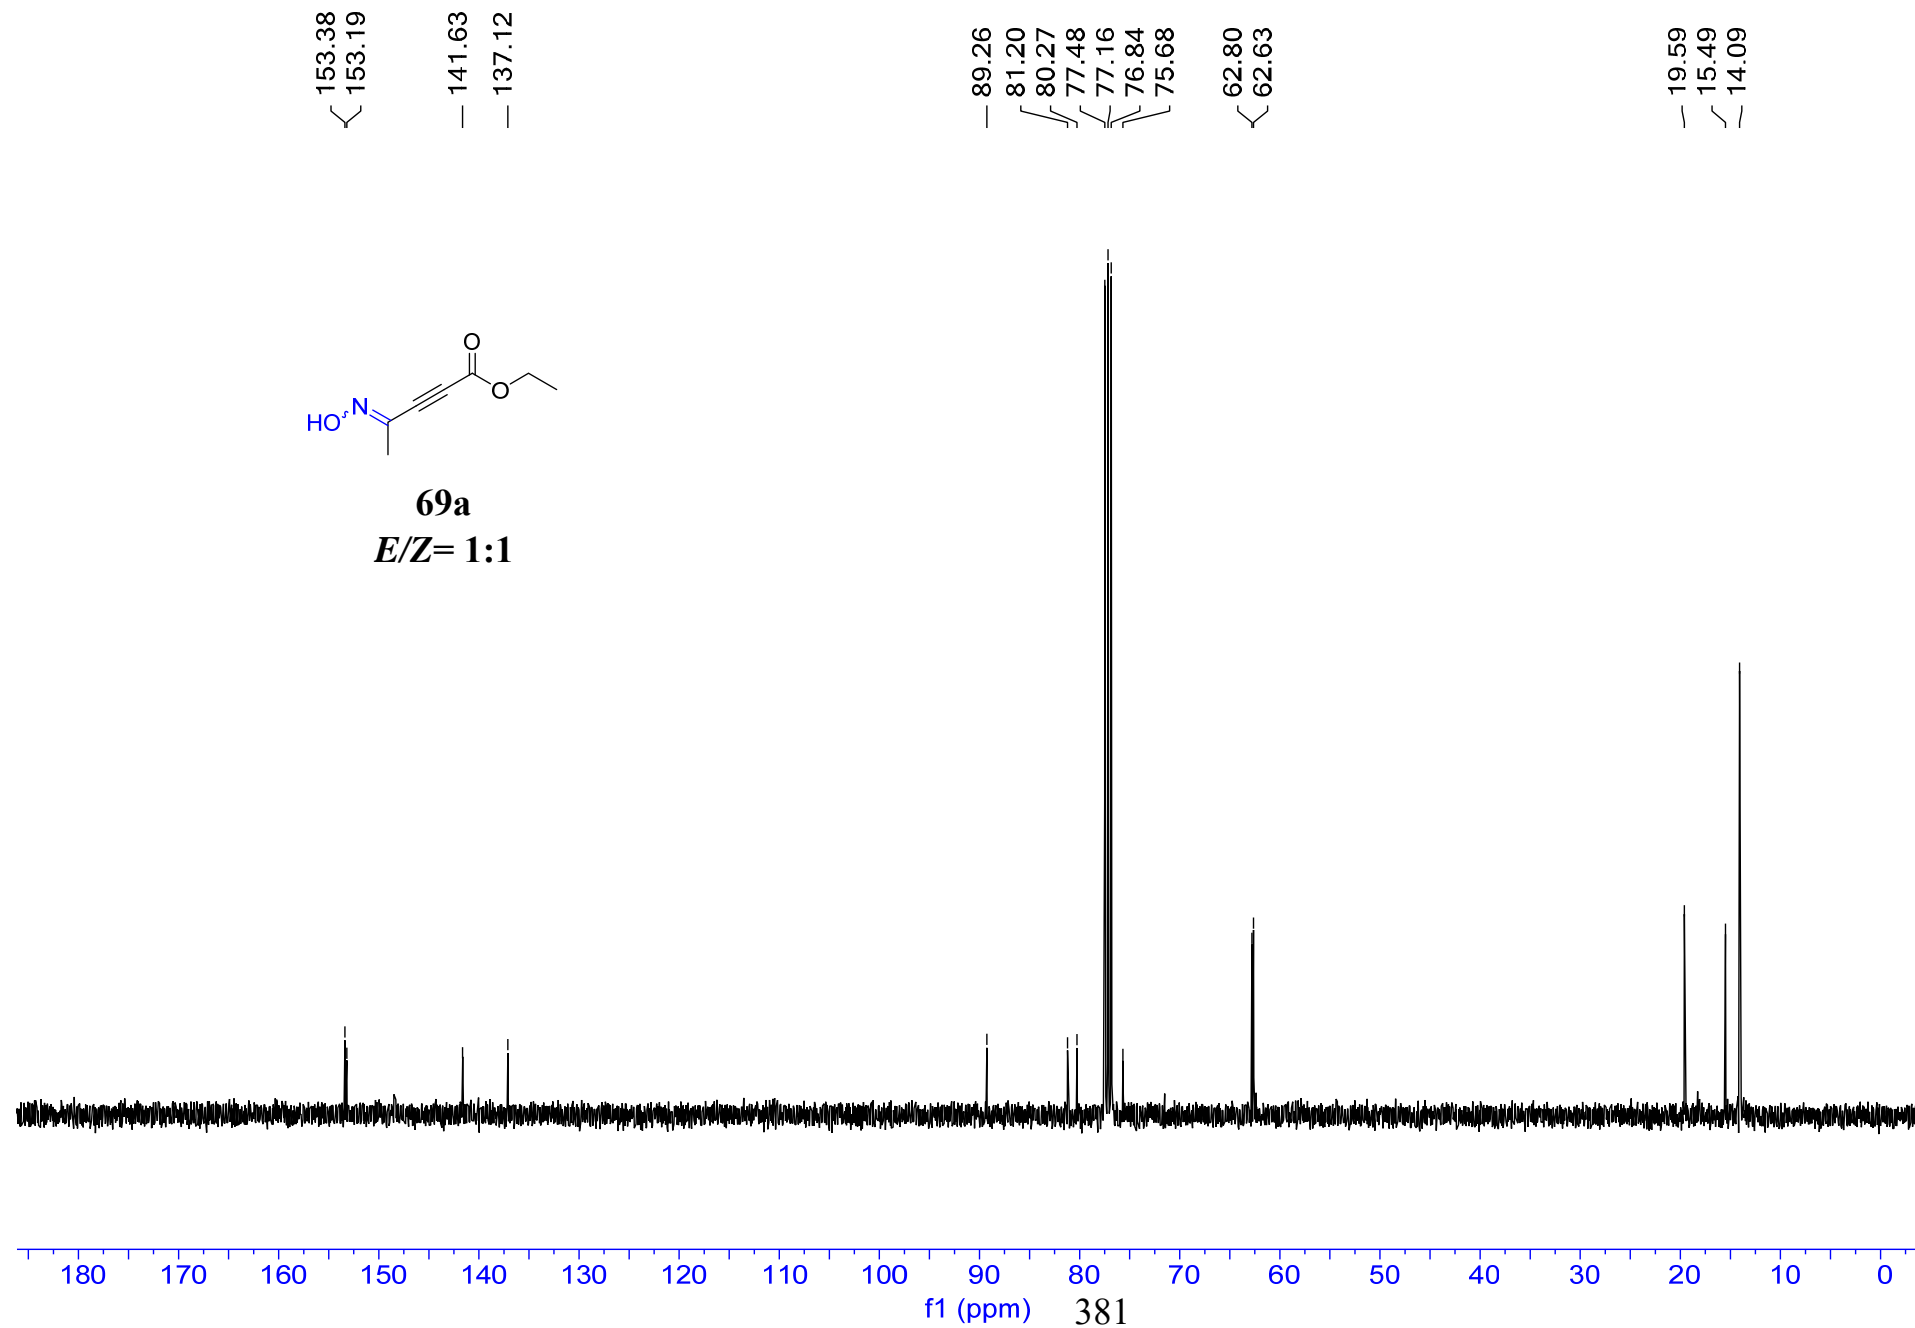

<sup>1</sup>H NMR, 400 MHz, CDCl<sub>3</sub>

— 8.759  
7.643  
7.634  
7.625  
7.619  
7.396  
7.386  
7.380  
7.260

— 2.308

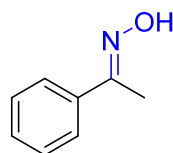

**70a**

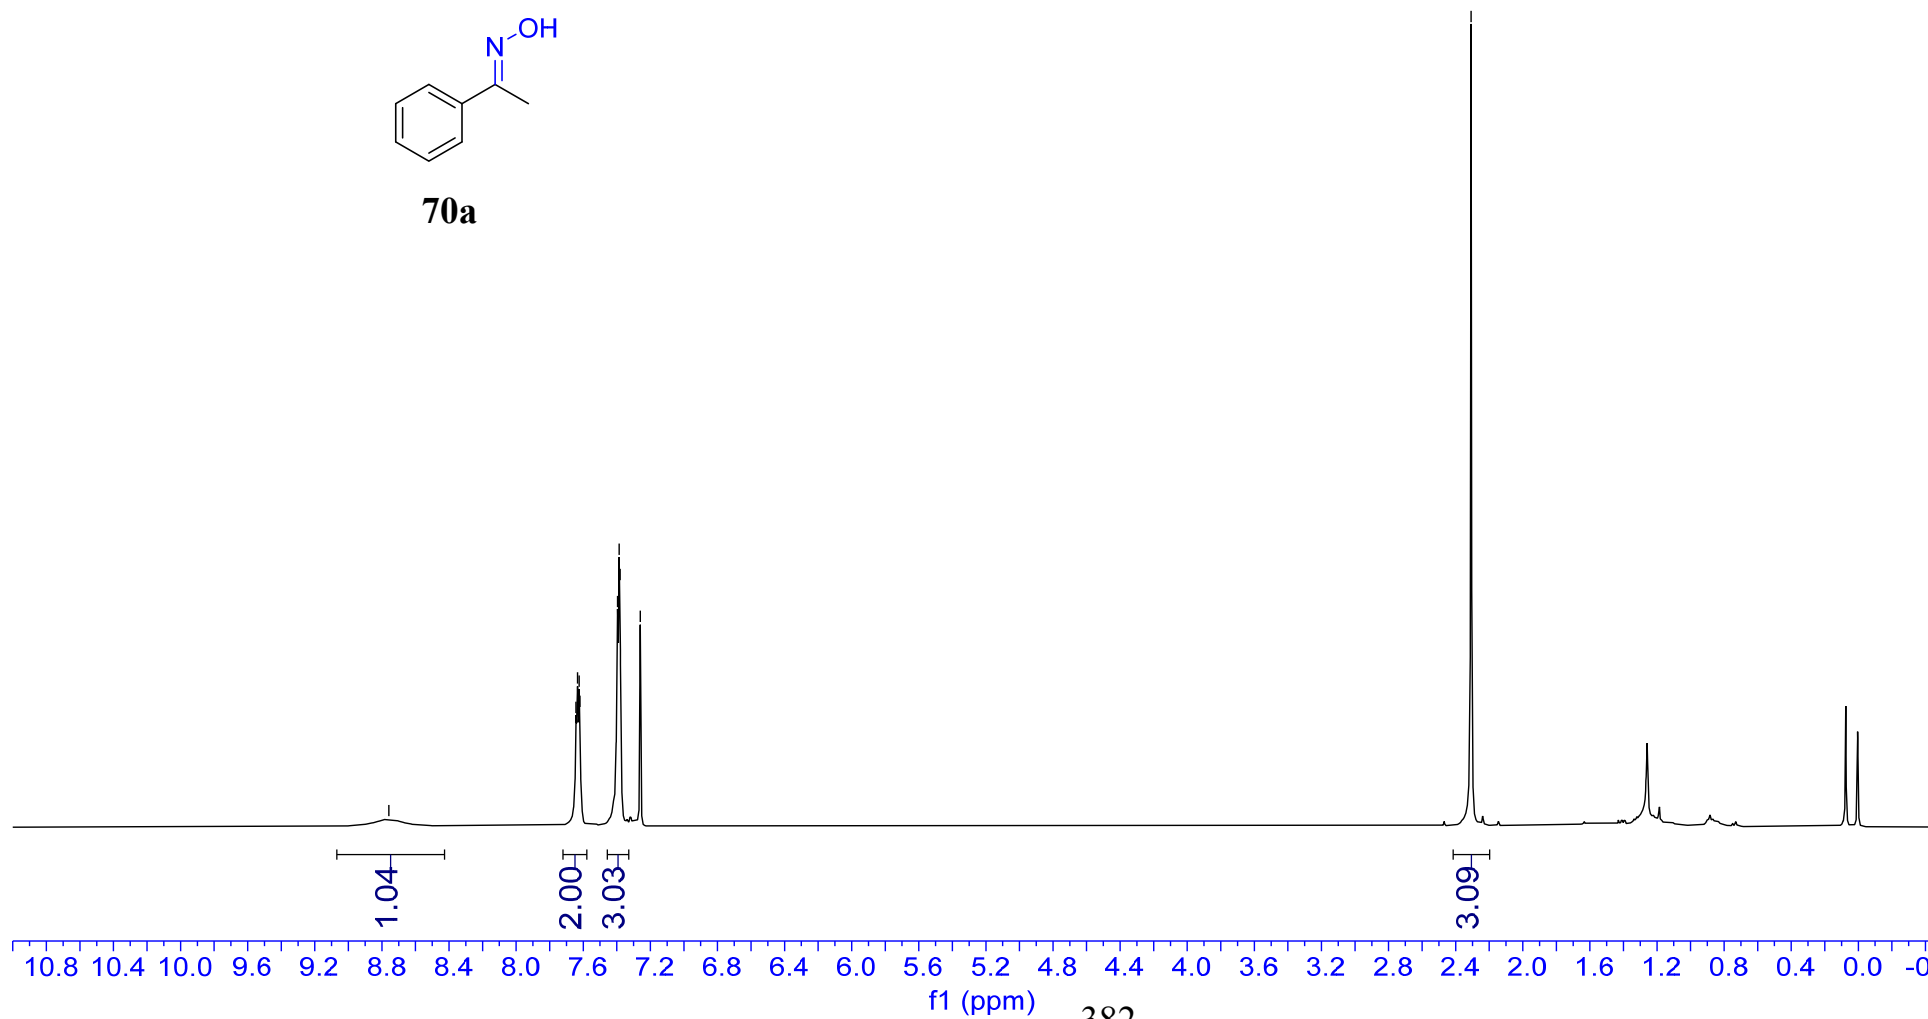

$^{13}\text{C}$  NMR 101 MHz,  $\text{CDCl}_3$

— 156.11

— 136.61

— 129.40

— 128.66

— 126.18

77.48  
77.16  
76.84

— 12.52

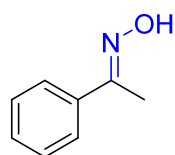

**70a**

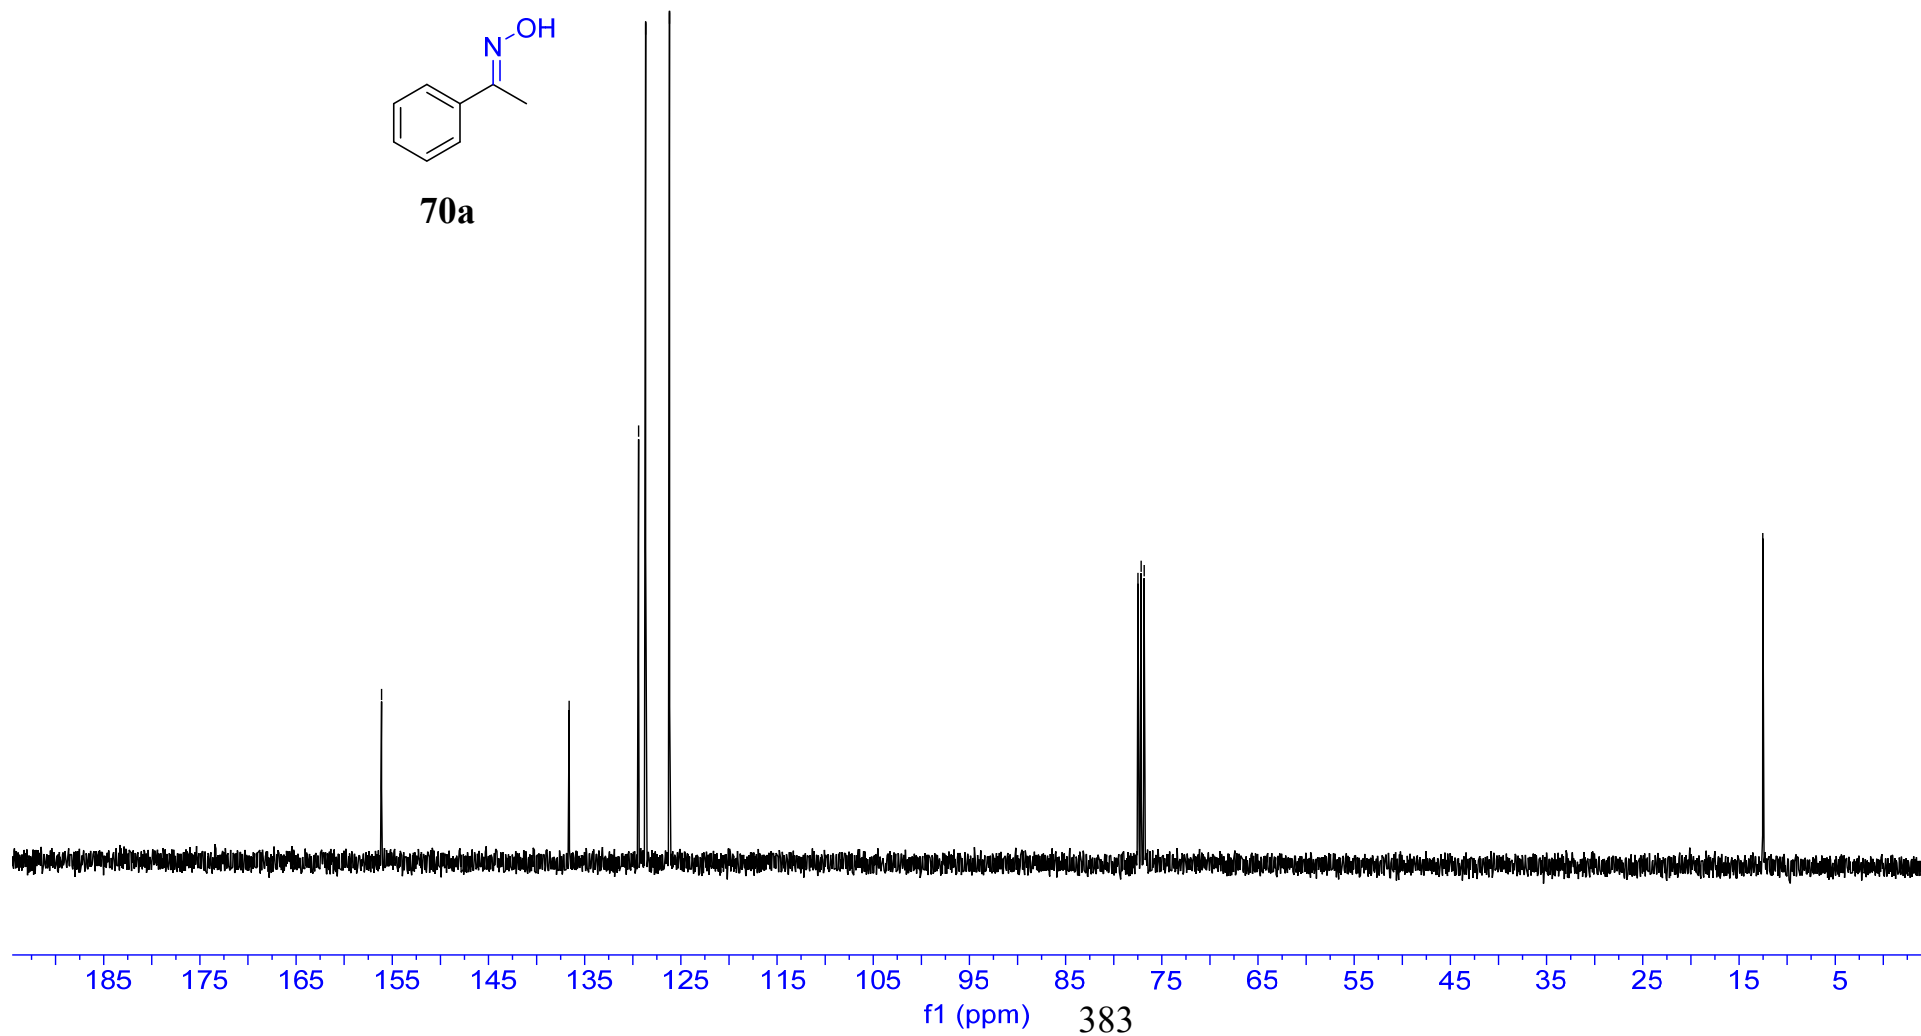

<sup>1</sup>H NMR, 400 MHz, CDCl<sub>3</sub>

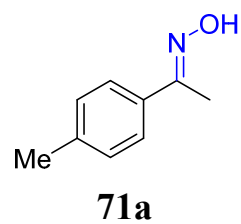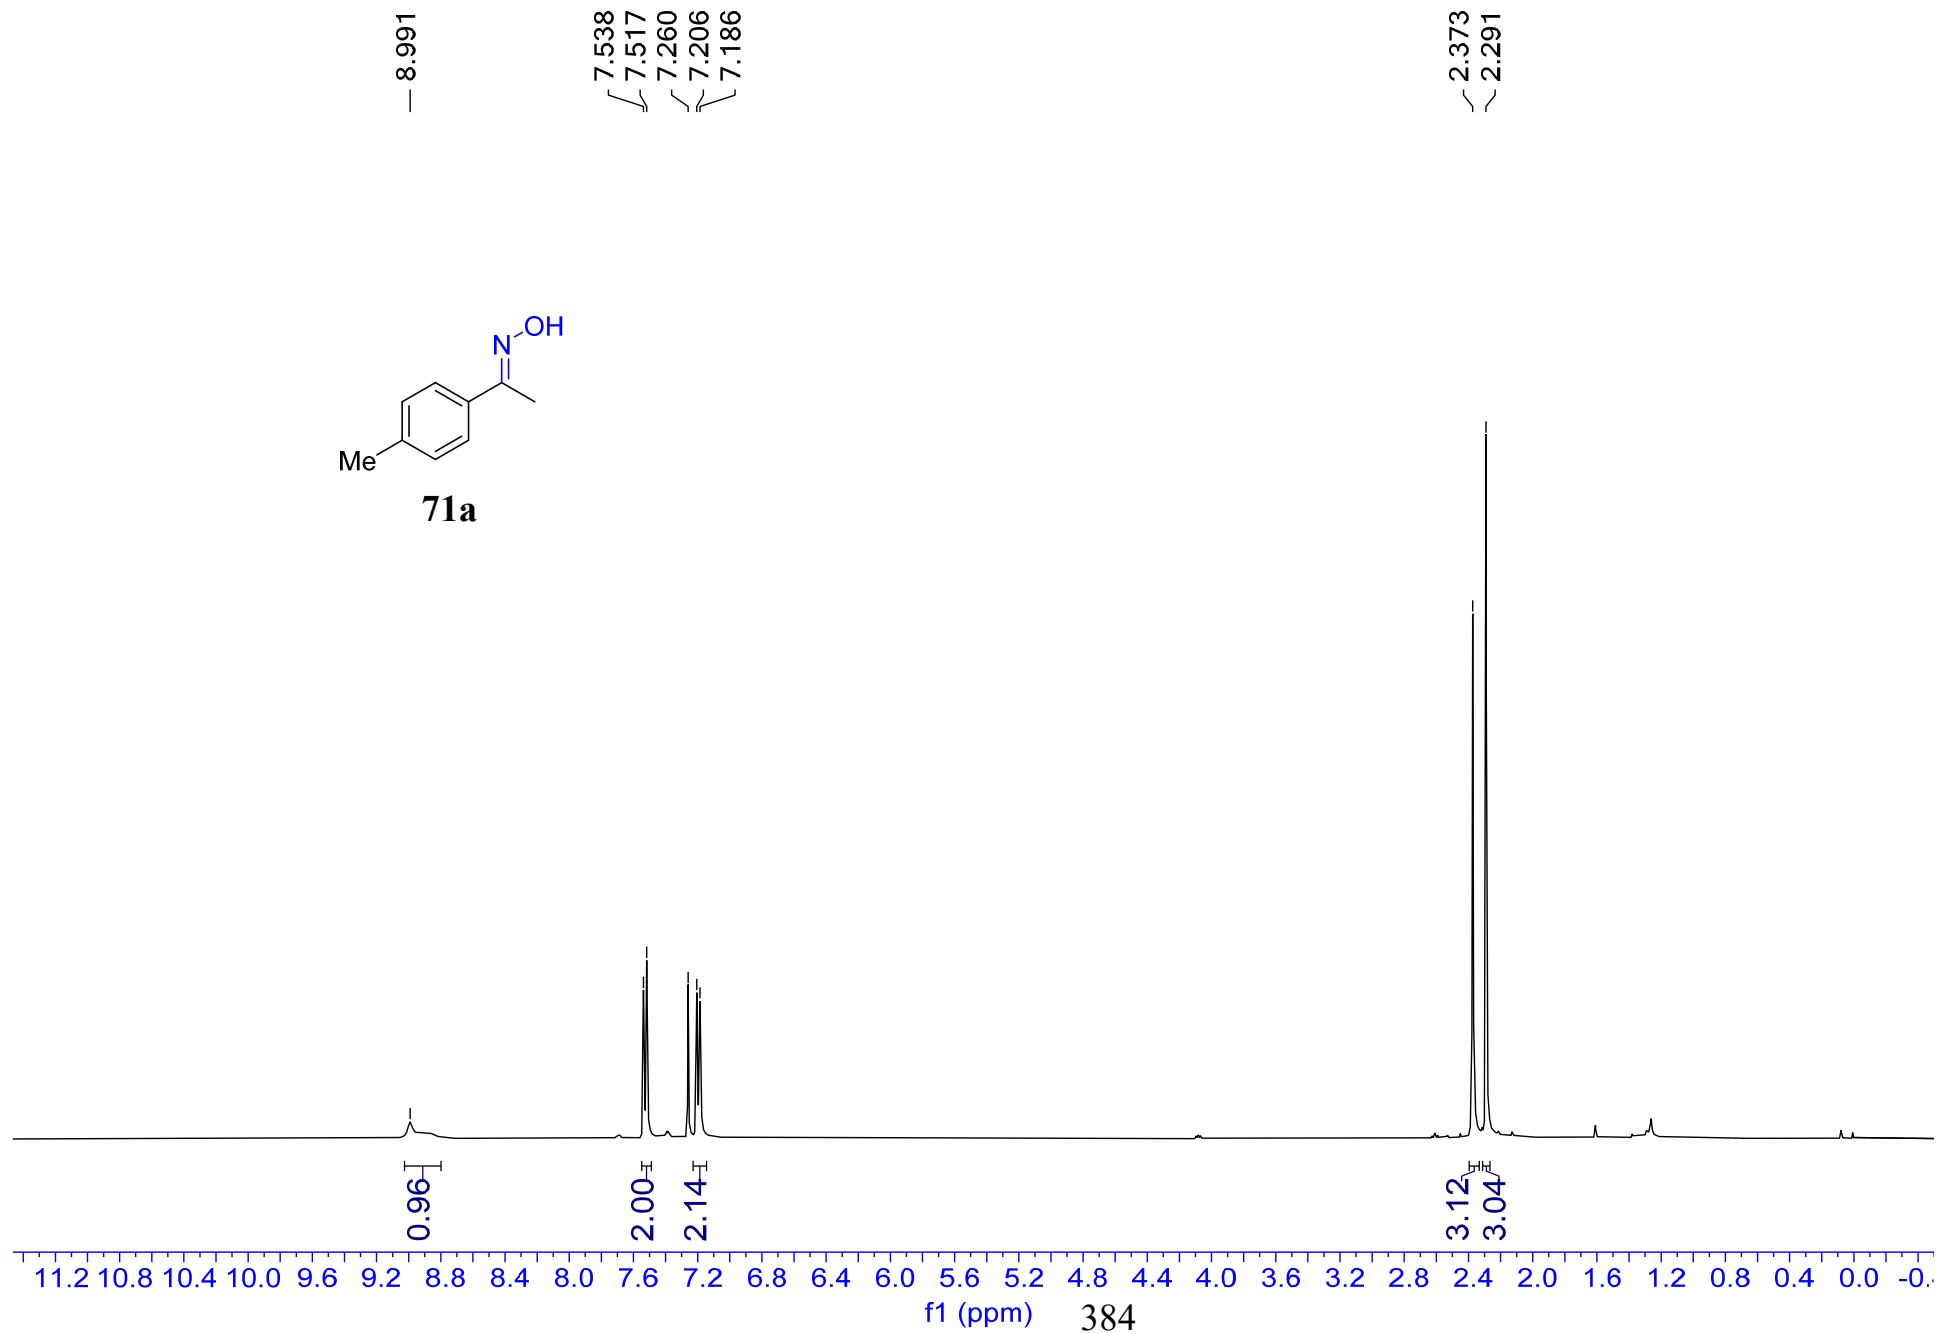

$^{13}\text{C}$  NMR 101 MHz,  $\text{CDCl}_3$

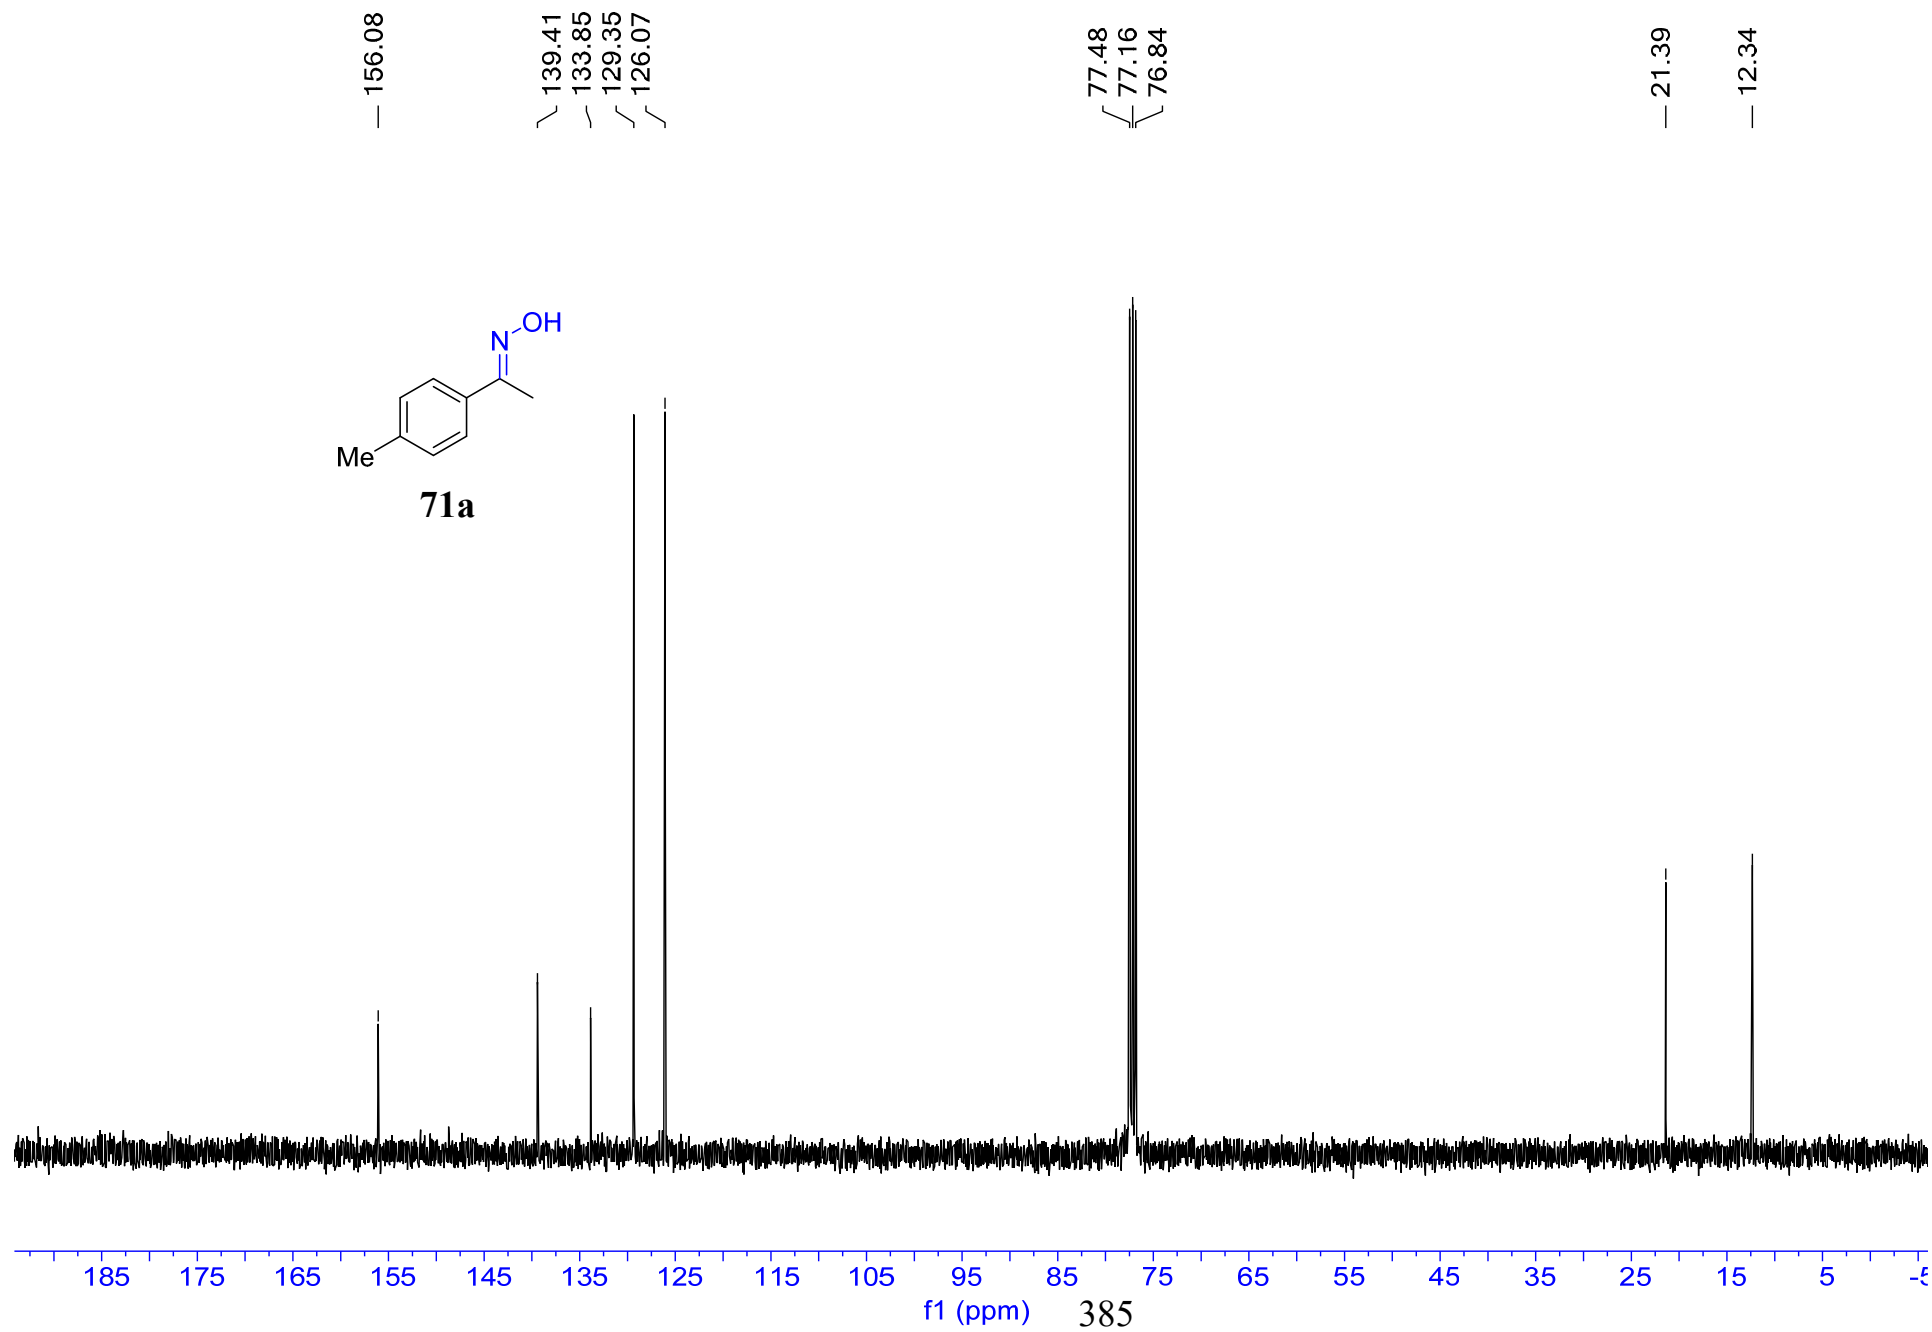

<sup>1</sup>H NMR, 400 MHz, CDCl<sub>3</sub>

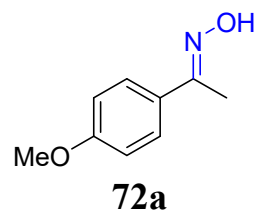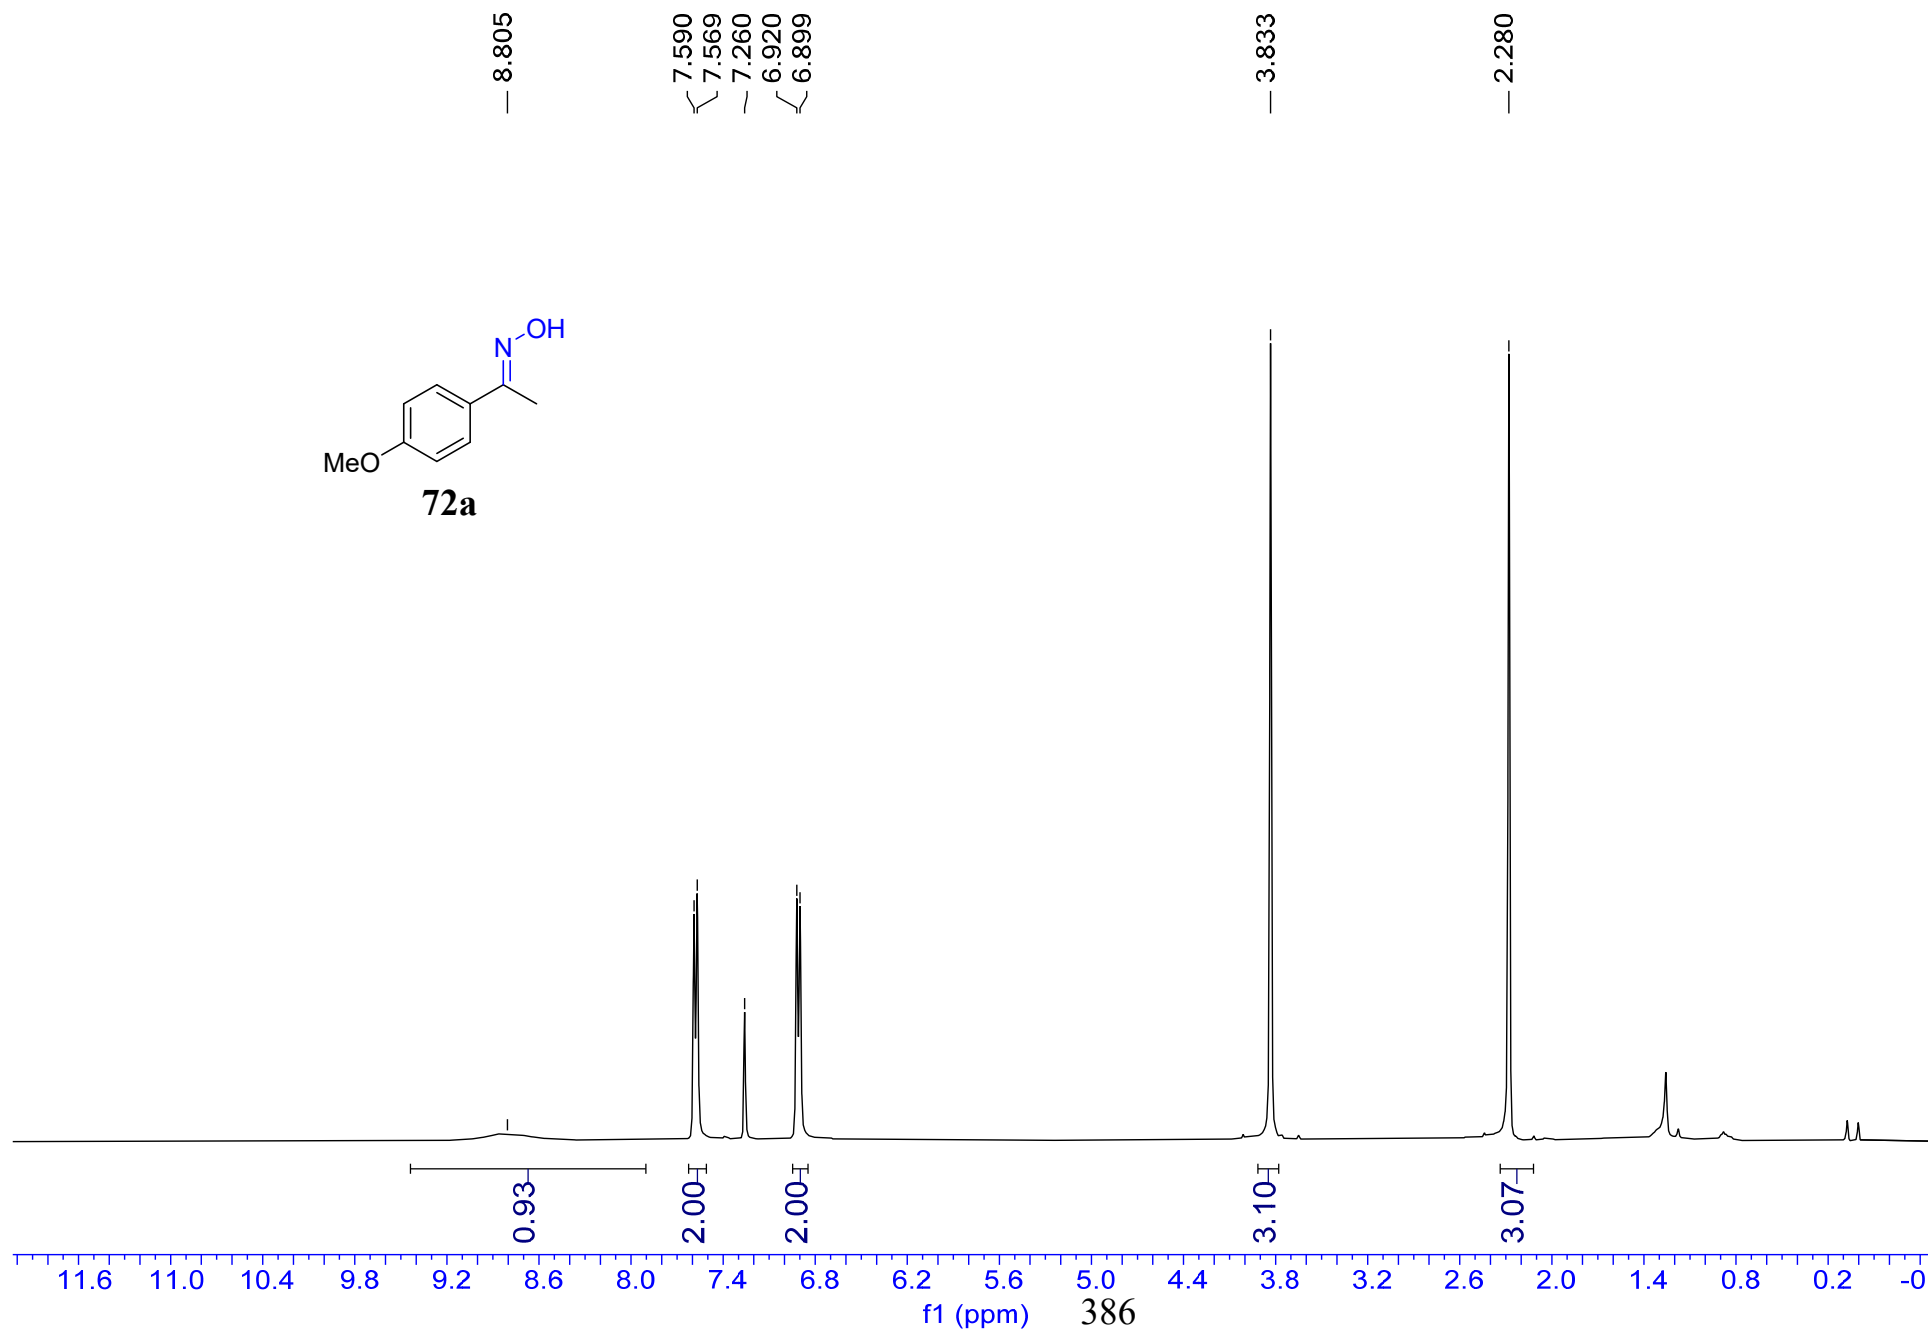

<sup>13</sup>C NMR 101 MHz, CDCl<sub>3</sub>

— 160.60  
— 155.65

~ 129.15  
~ 127.50

— 114.00

{ 77.48  
77.16  
76.84 }

— 55.45

— 12.31

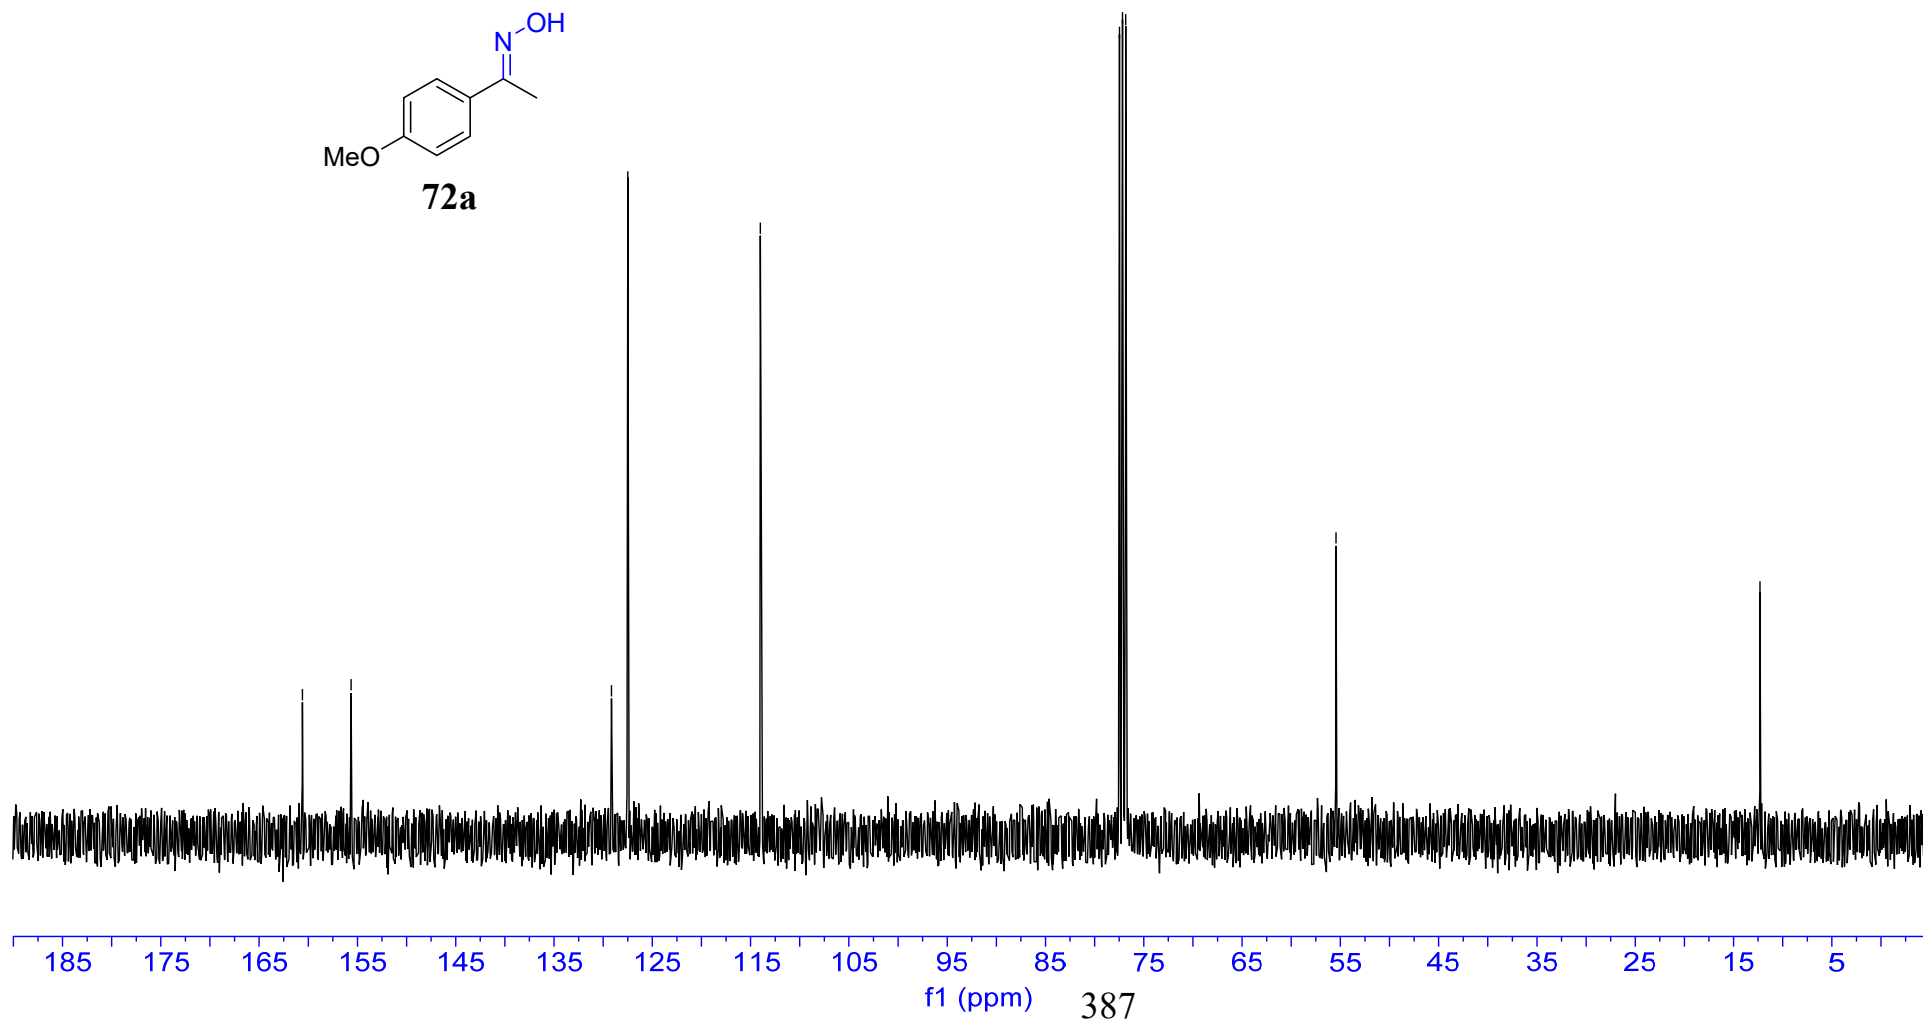

<sup>1</sup>H NMR, 400 MHz, CDCl<sub>3</sub>

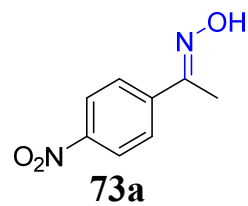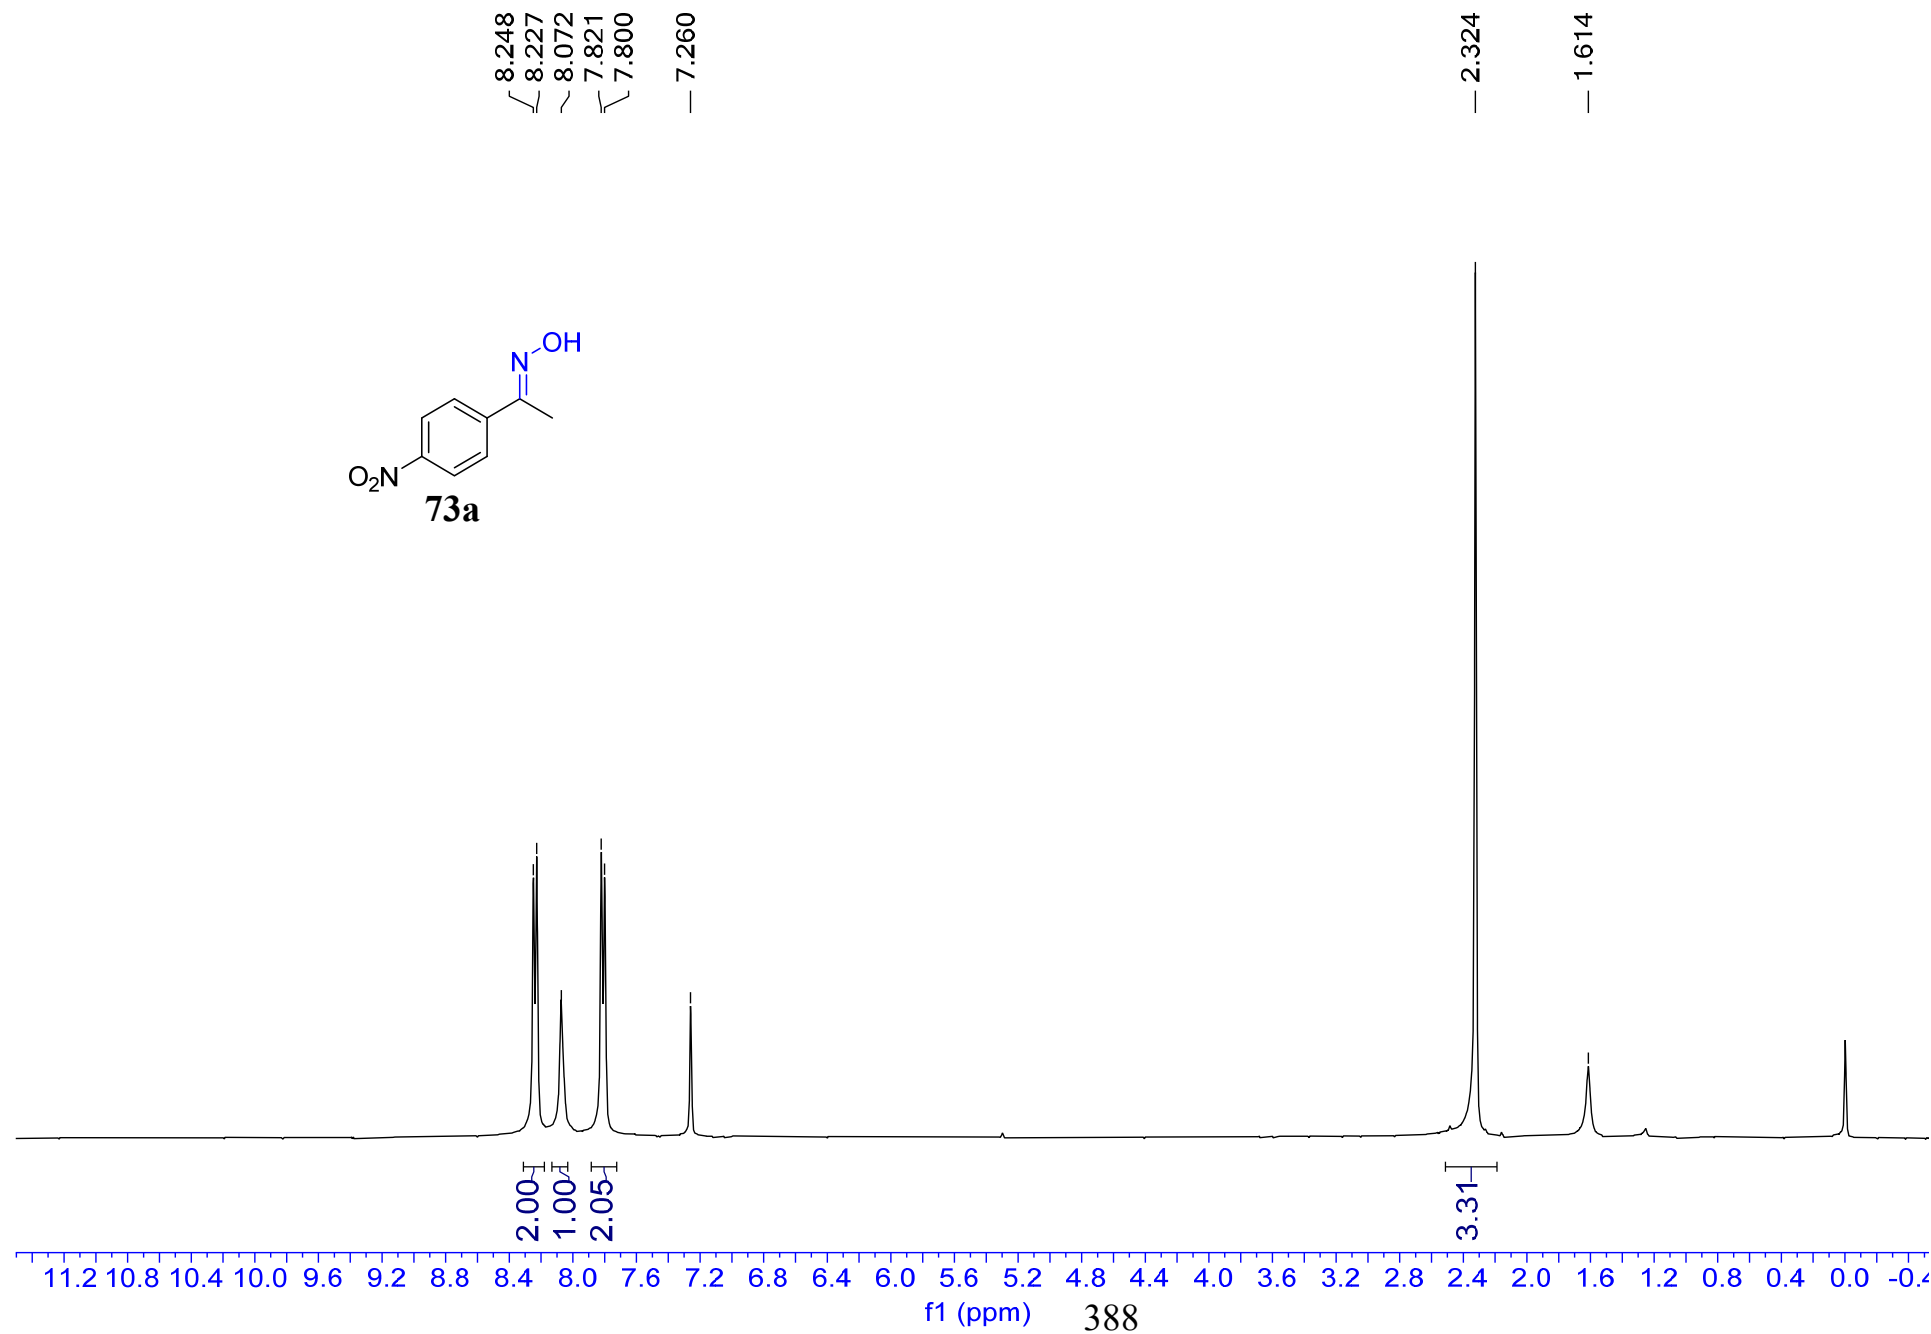



<sup>13</sup>C NMR 101 MHz, CD<sub>3</sub>OD

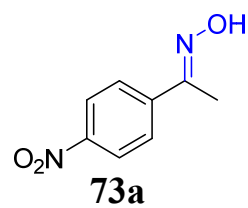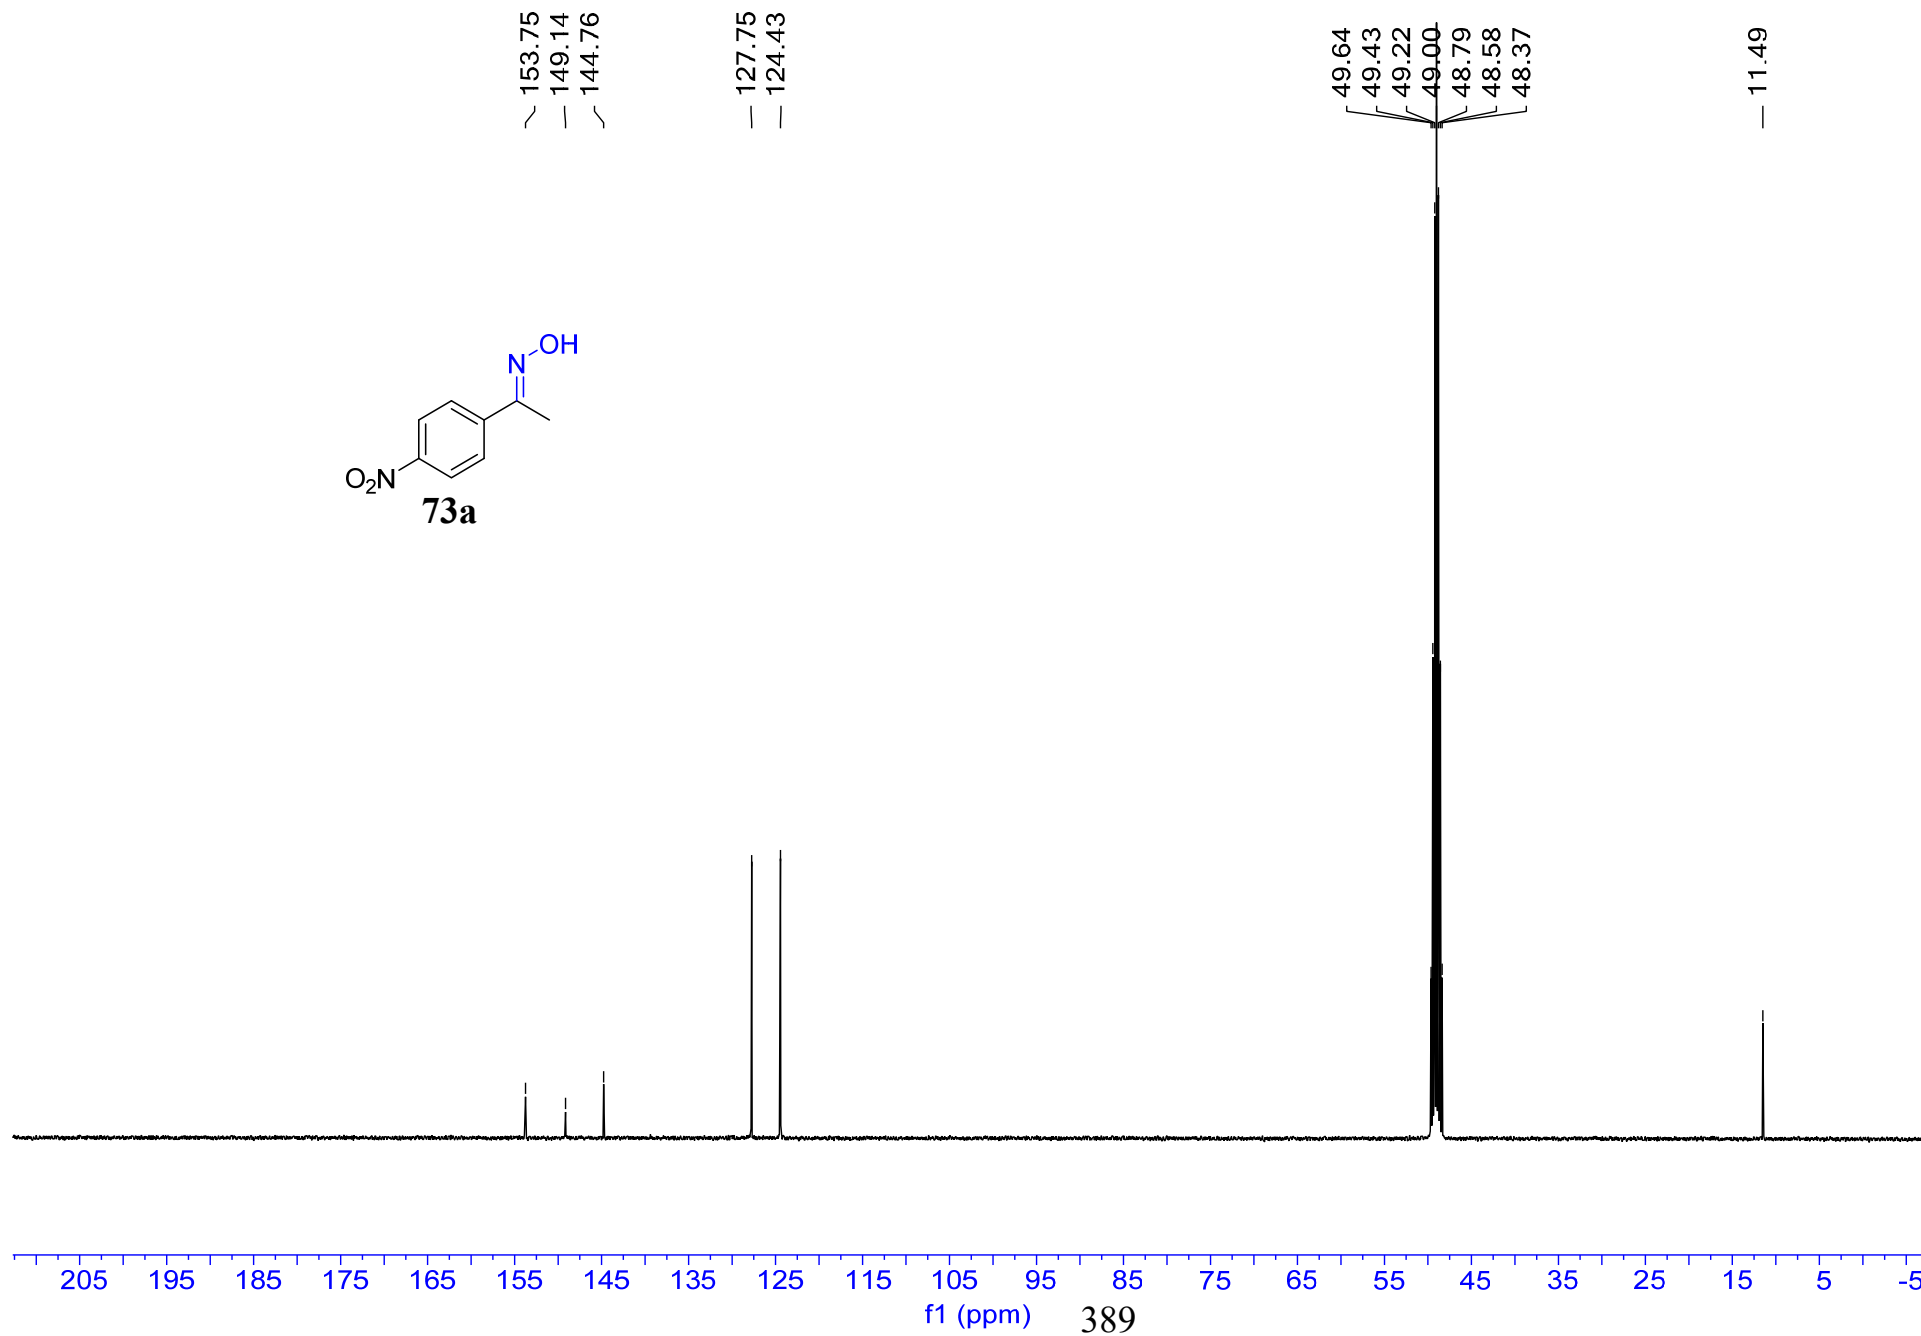

<sup>1</sup>H NMR, 400 MHz, CDCl<sub>3</sub>

8.424  
7.629  
7.615  
7.608  
7.594  
7.260  
7.090  
7.069  
7.047

2.280

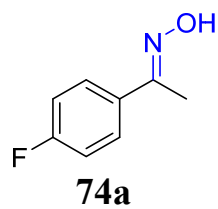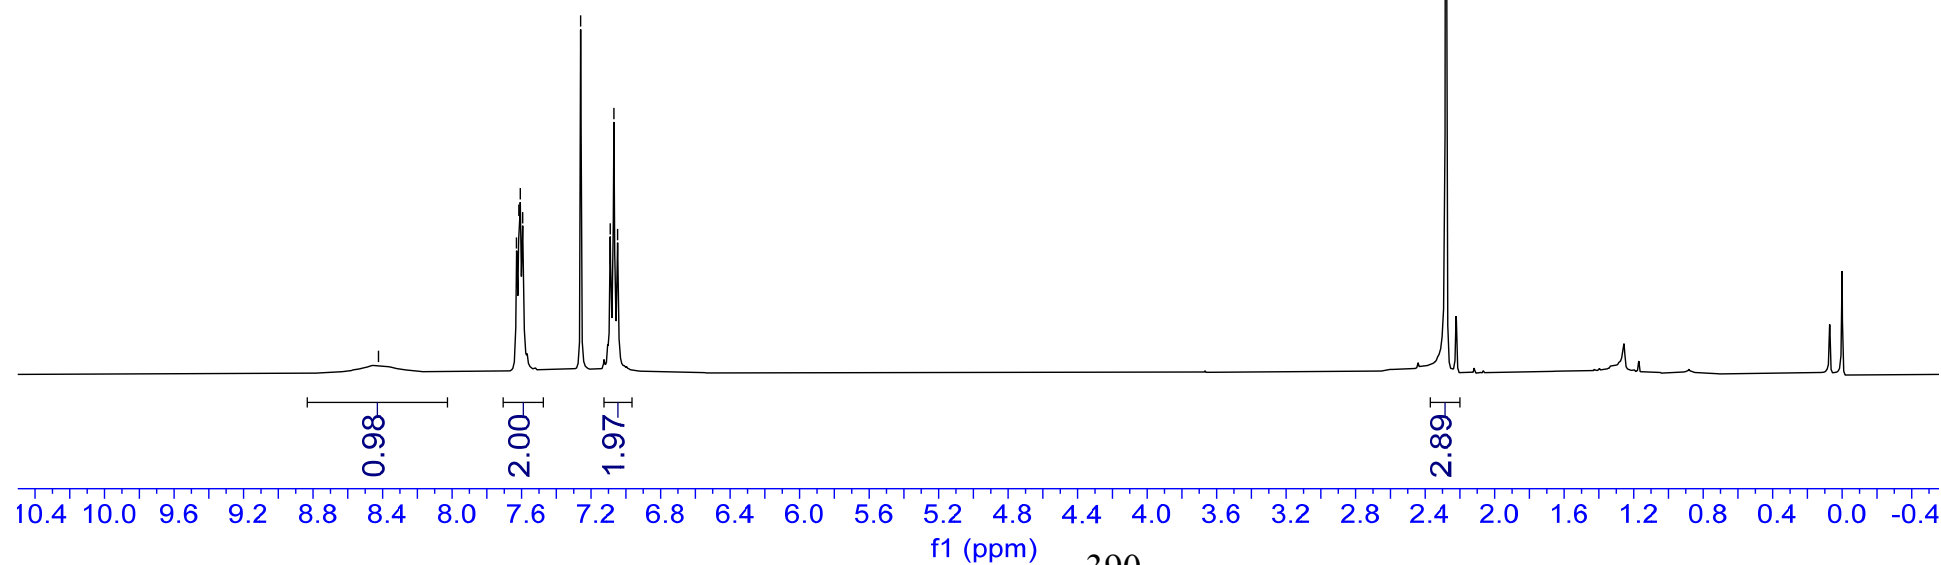

$^{13}\text{C}$  NMR 101 MHz,  $\text{CDCl}_3$

— 164.81  
— 162.34  
— 155.34

— 132.75  
— 132.71  
— 128.08  
— 128.00

— 115.75  
— 115.54

— 77.48  
— 77.16  
— 76.84

— 12.51

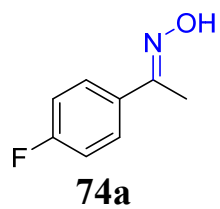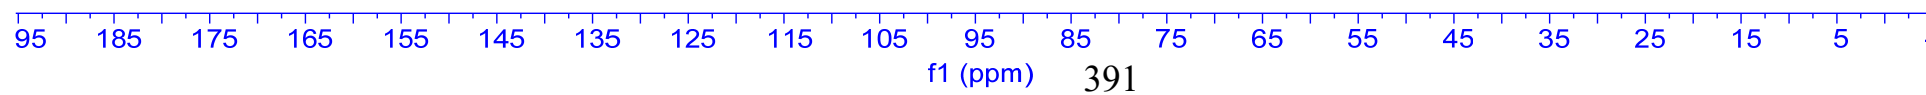

$^{19}\text{F}$  NMR 376 MHz,  $\text{CDCl}_3$



— -112.152

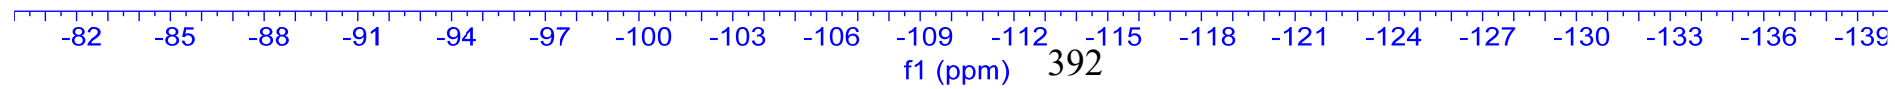

<sup>1</sup>H NMR, 400 MHz, CDCl<sub>3</sub>

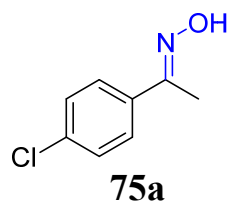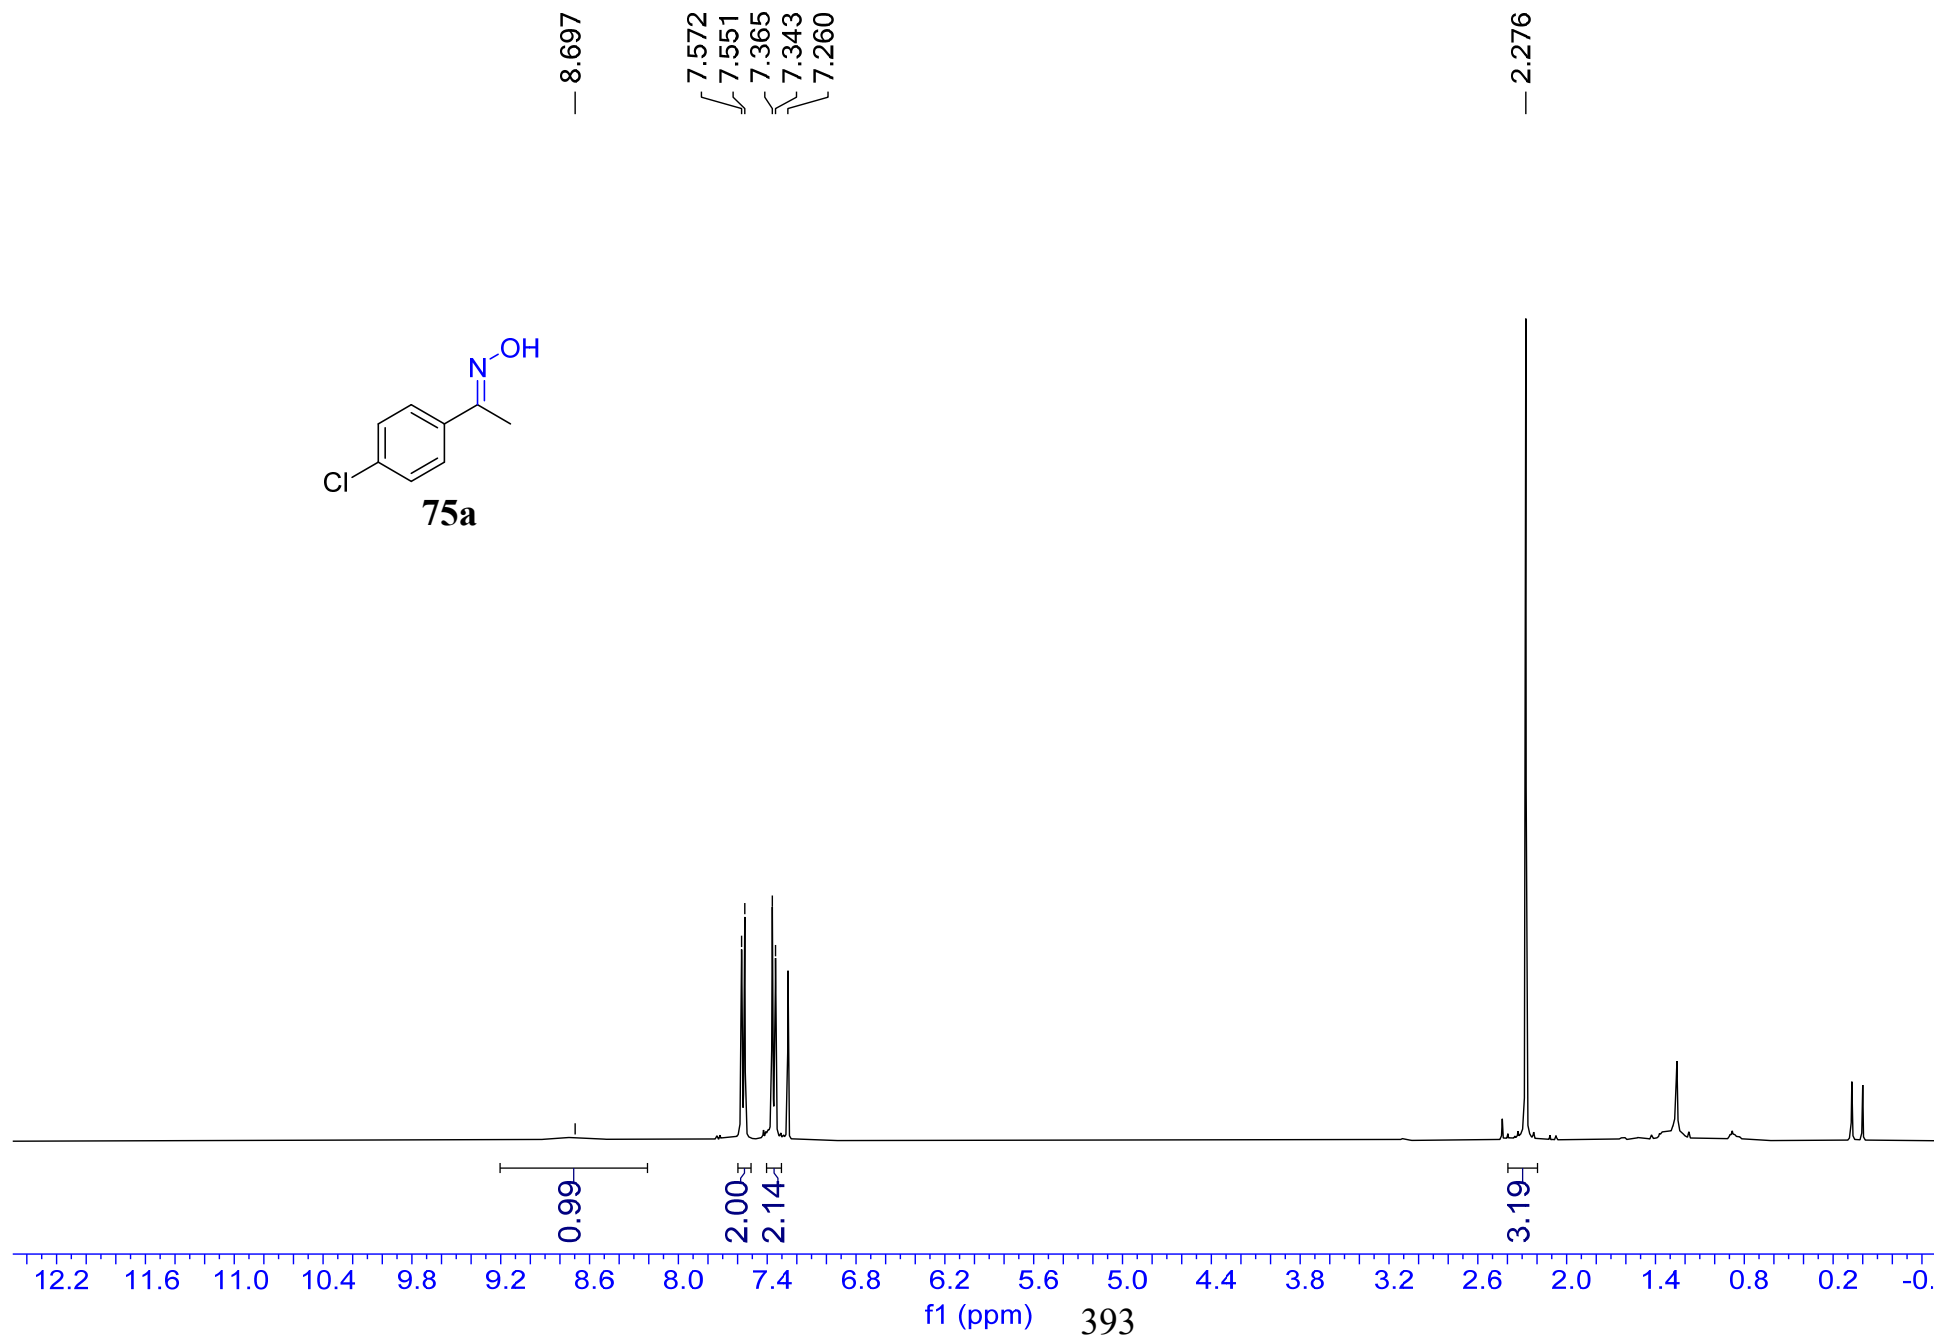

$^{13}\text{C}$  NMR 101 MHz,  $\text{CDCl}_3$

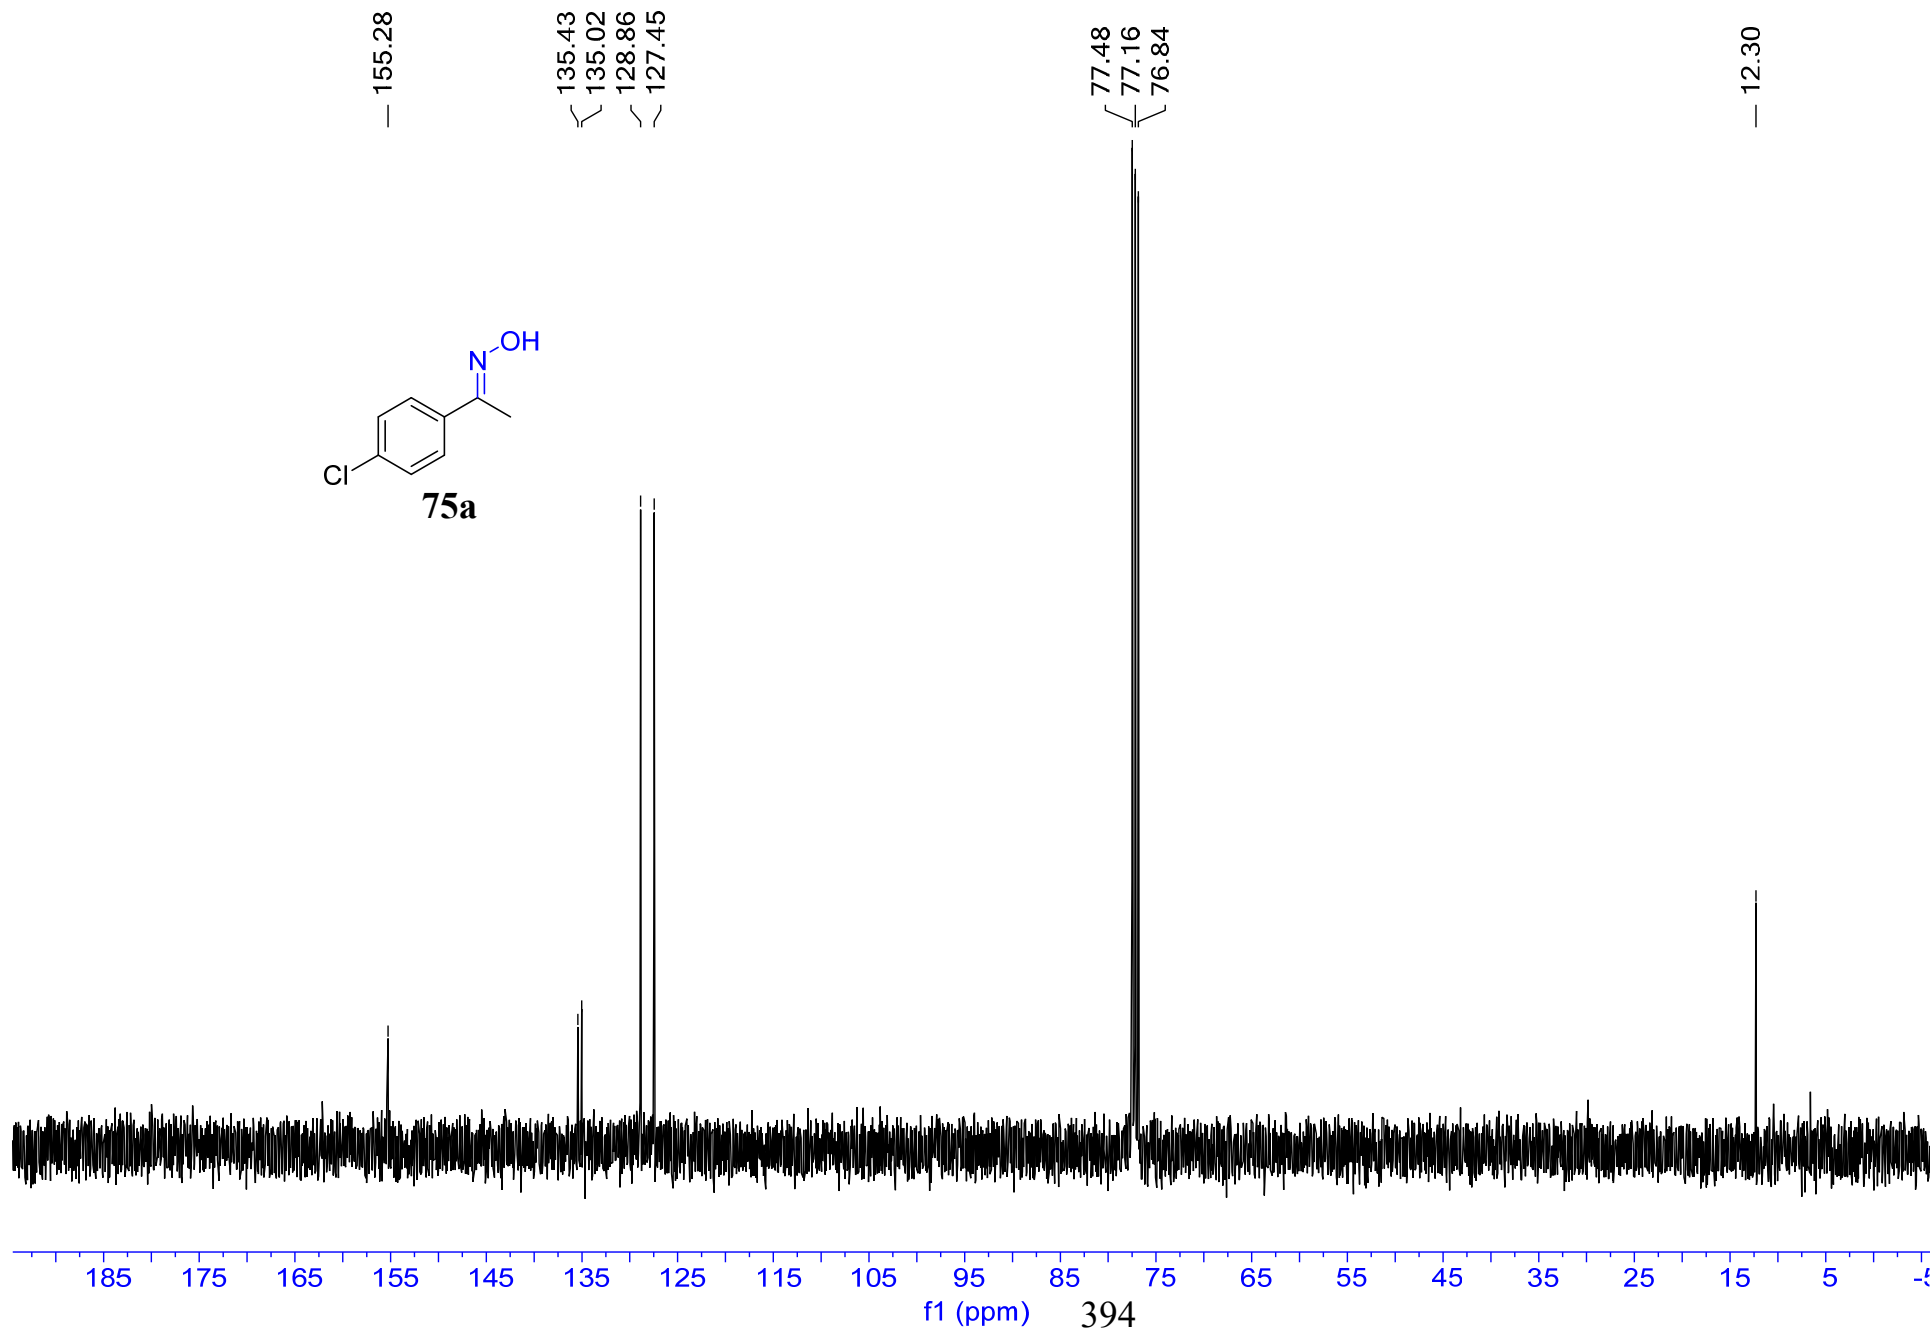

<sup>1</sup>H NMR, 400 MHz, CDCl<sub>3</sub>

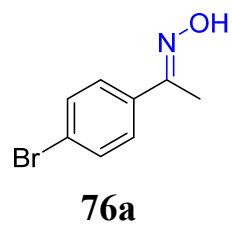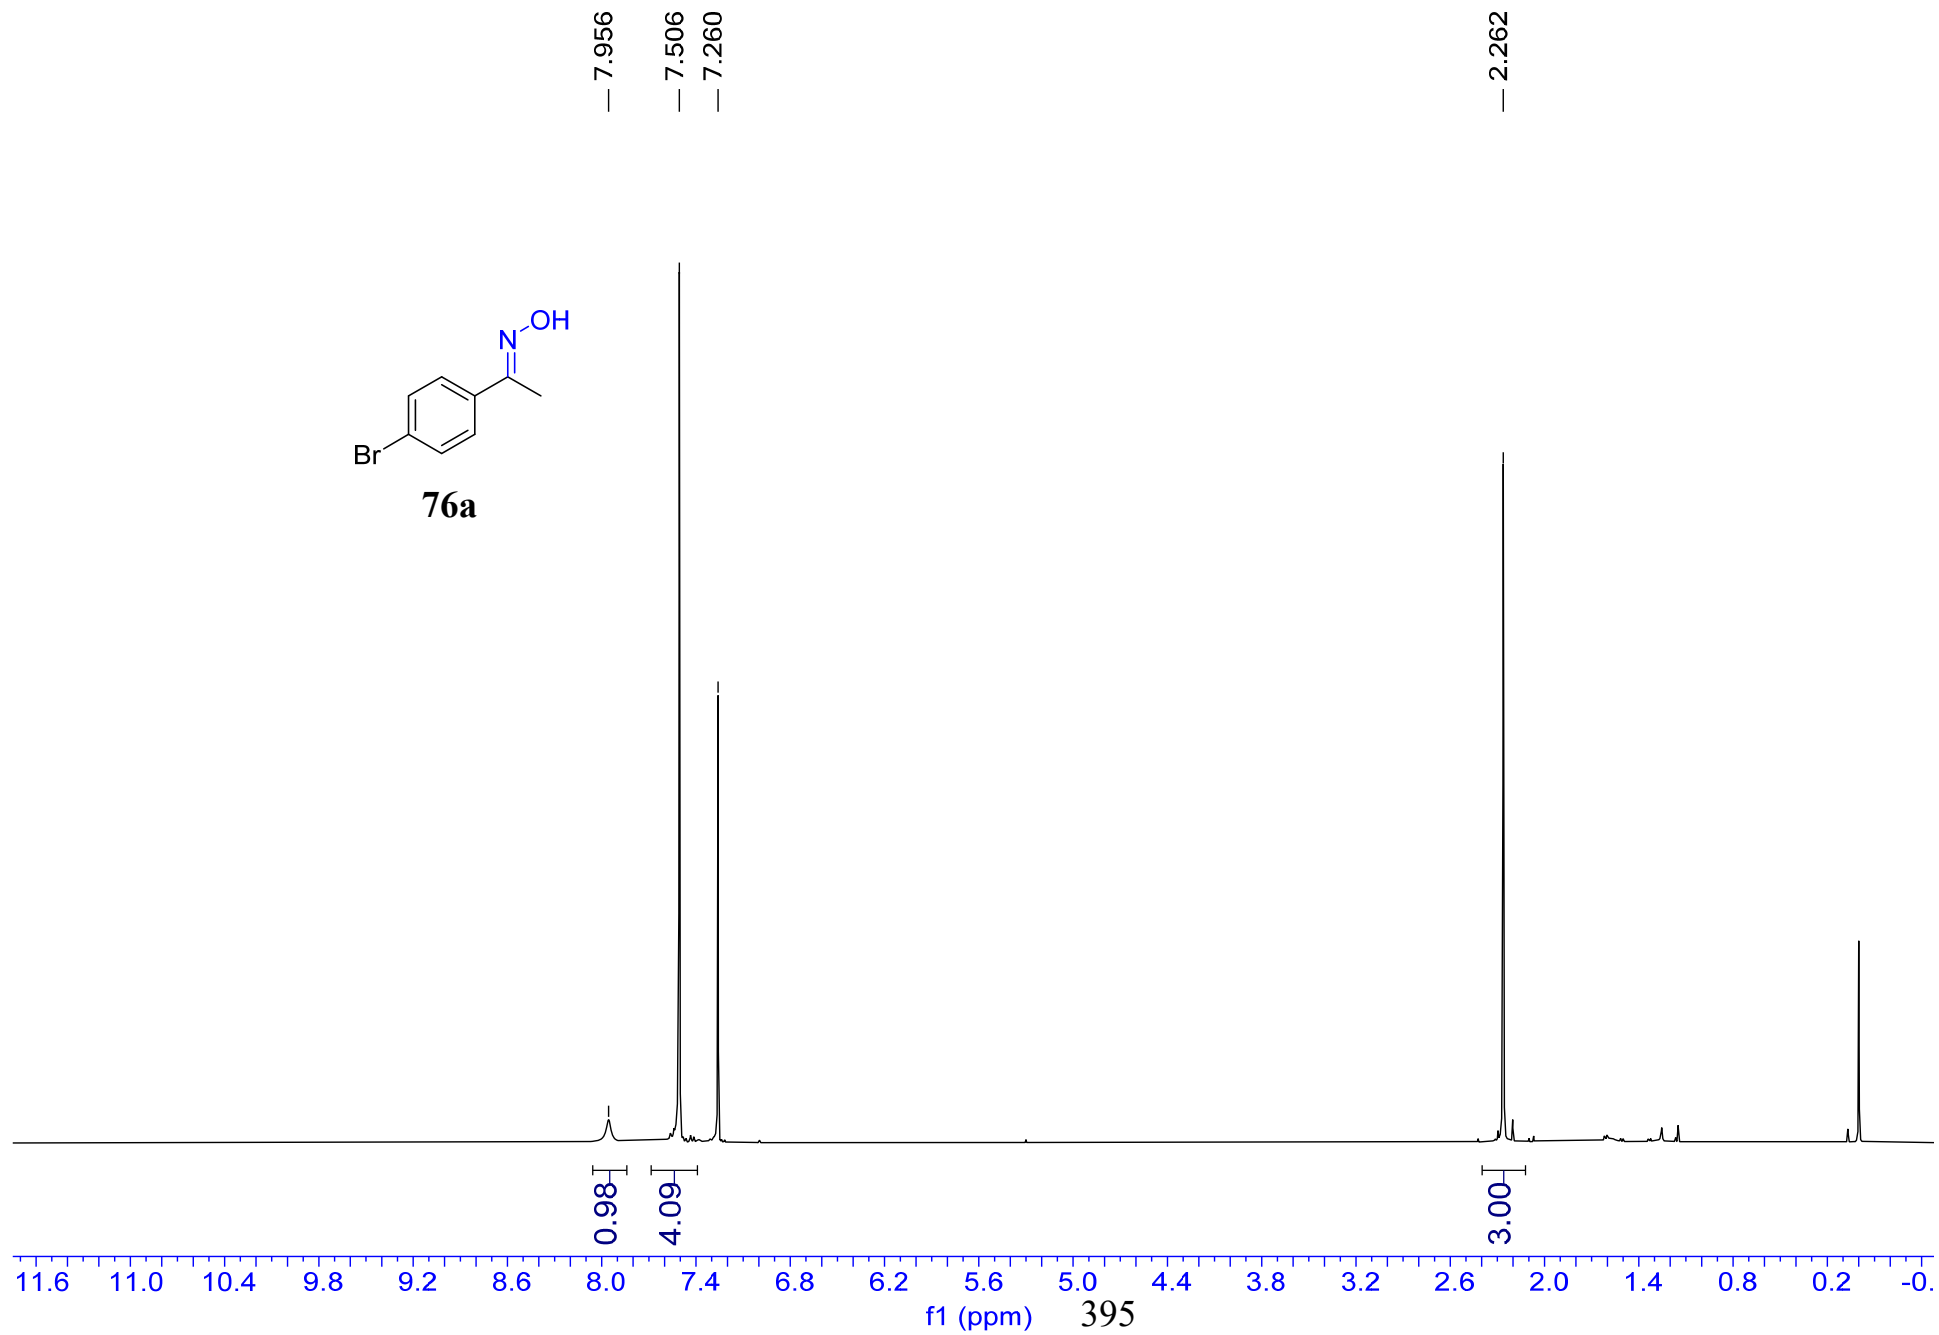

$^{13}\text{C}$  NMR 101 MHz,  $\text{CDCl}_3$

— 155.34

— 135.45

— 131.81

— 127.71

— 123.71

— 77.48

— 77.16

— 76.85

— 12.31

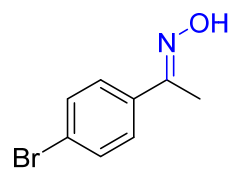

**76a**

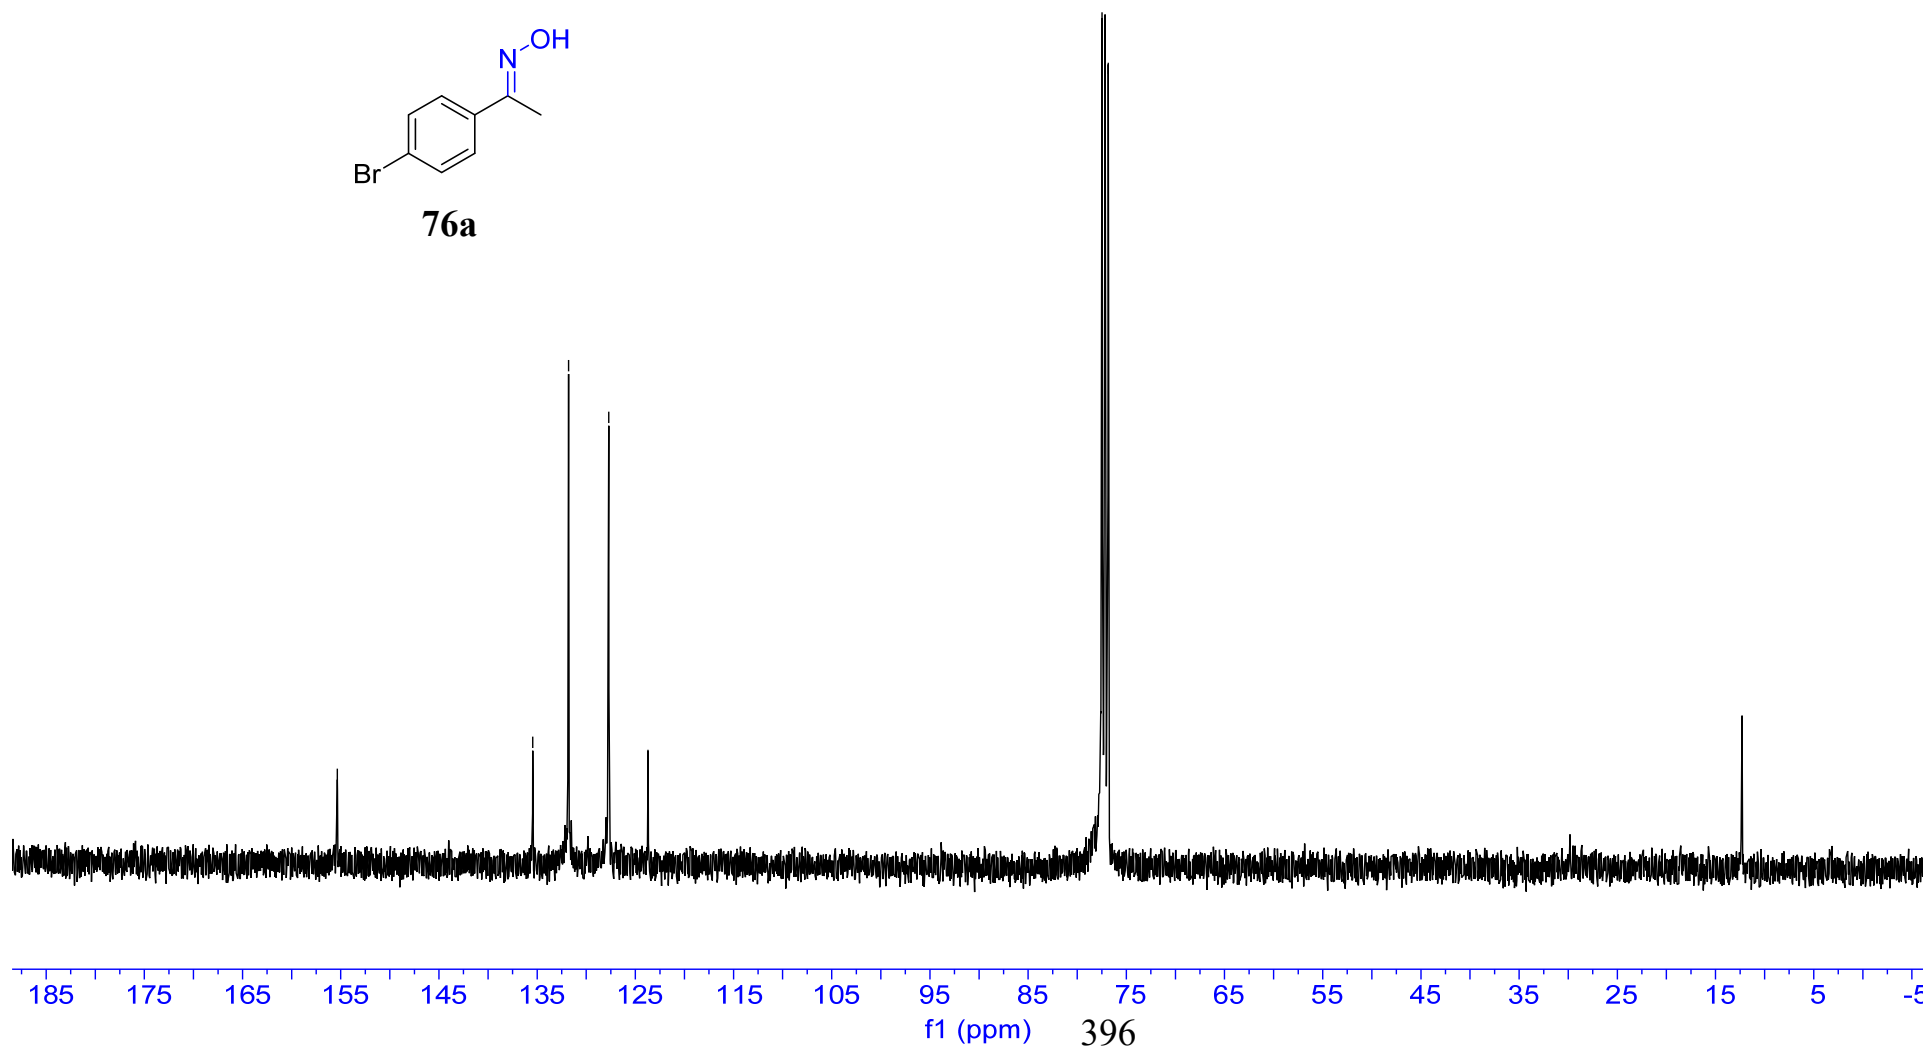



<sup>1</sup>H NMR, 400 MHz, CDCl<sub>3</sub>

8.523  
7.805  
7.800  
7.796  
7.588  
7.568  
7.565  
7.541  
7.523  
7.521  
7.518  
7.300  
7.286  
7.280  
7.260

2.295

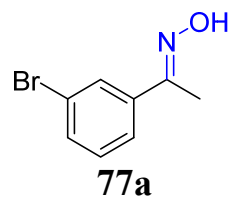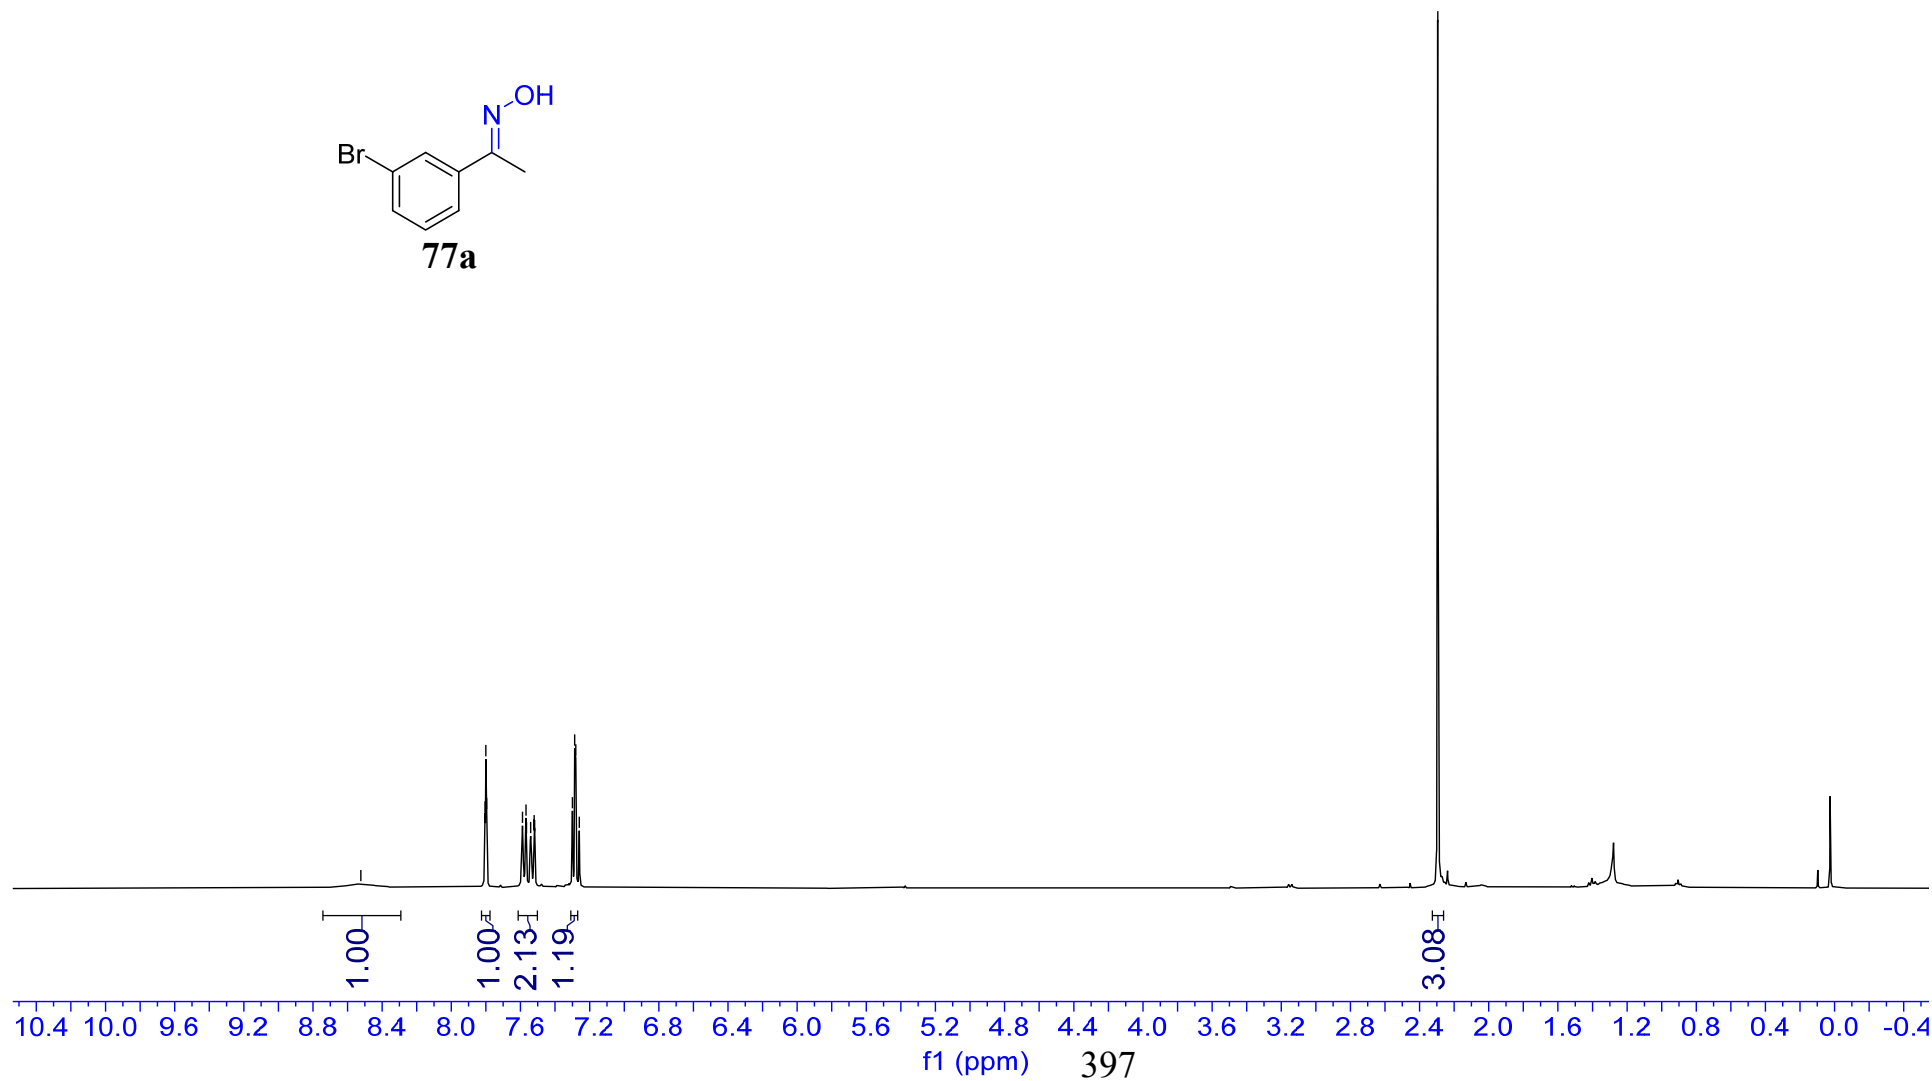

$^{13}\text{C}$  NMR 101 MHz,  $\text{CDCl}_3$

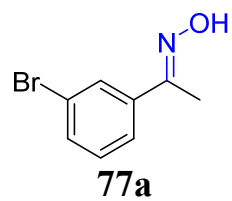

— 155.07

— 138.62

— 132.30

— 130.14

— 129.29

— 124.76

— 122.82

{ 77.48  
77.16  
76.84 }

— 12.39

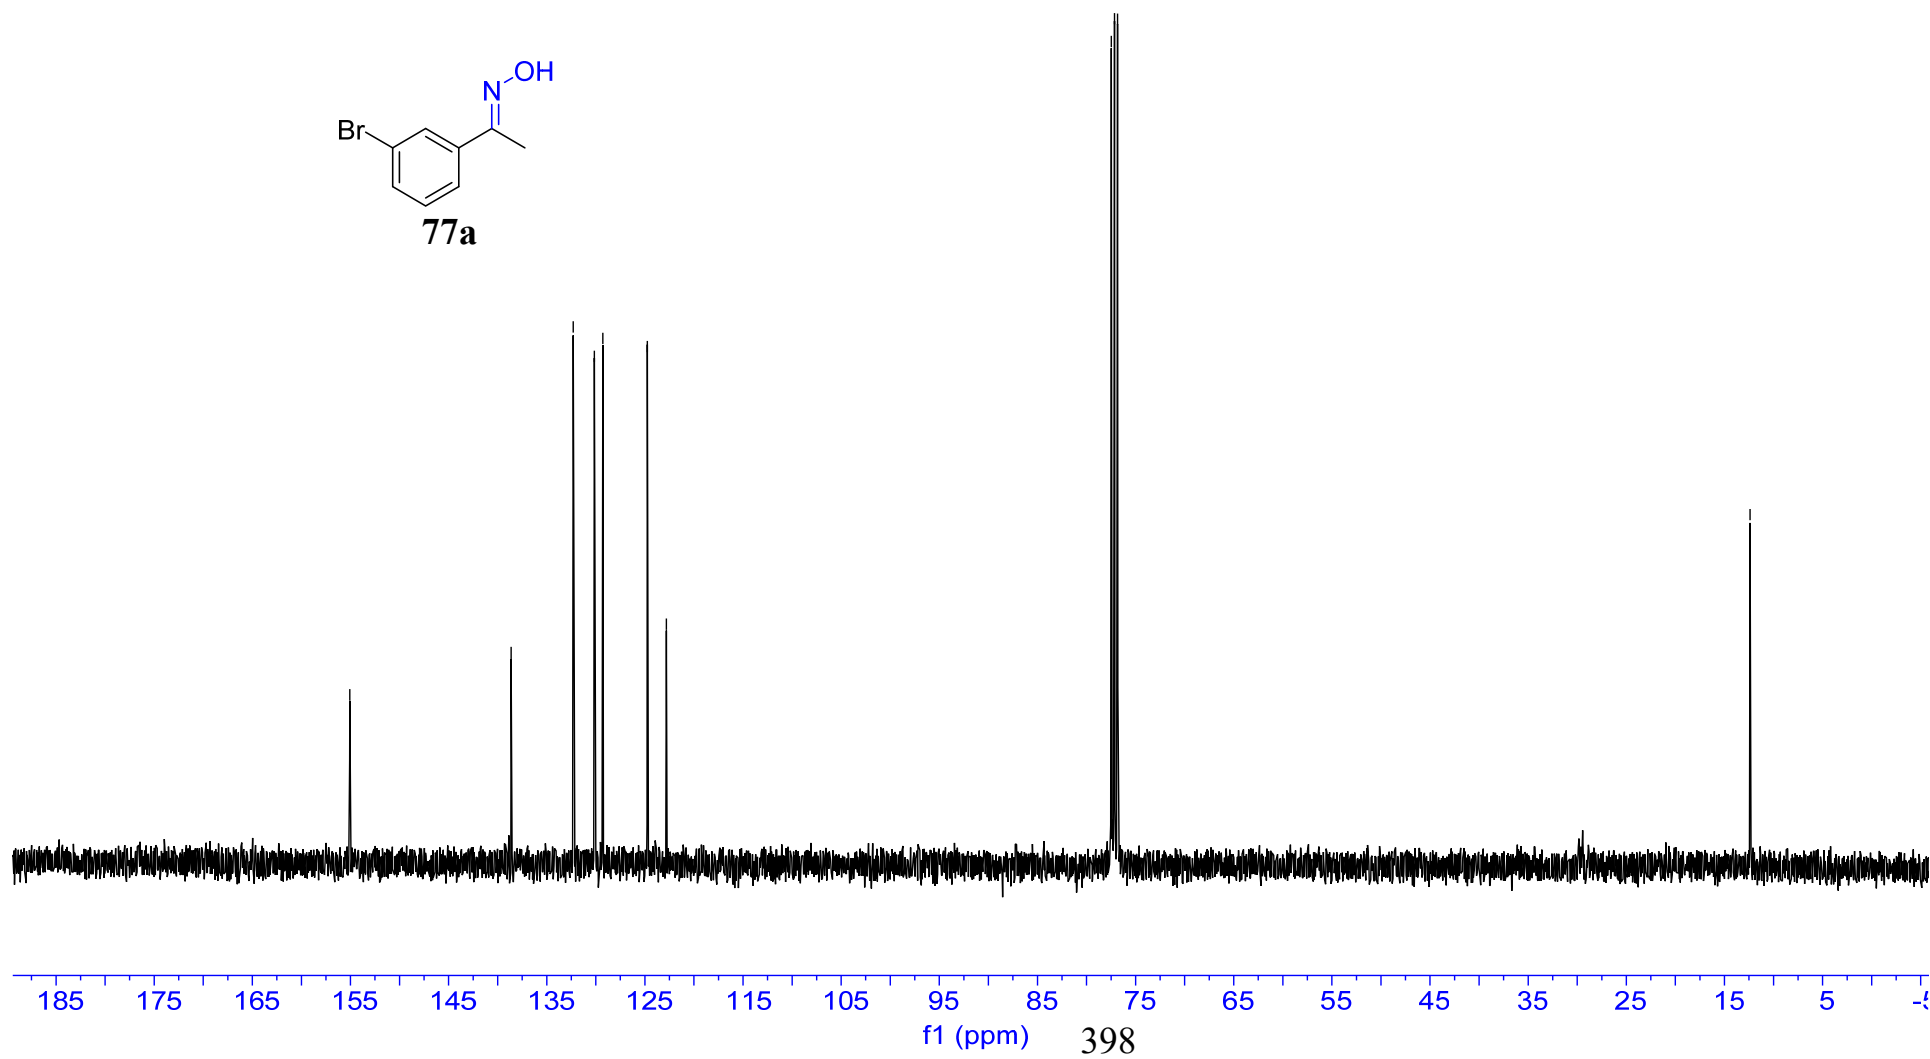

<sup>1</sup>H NMR, 400 MHz, CDCl<sub>3</sub>

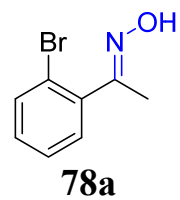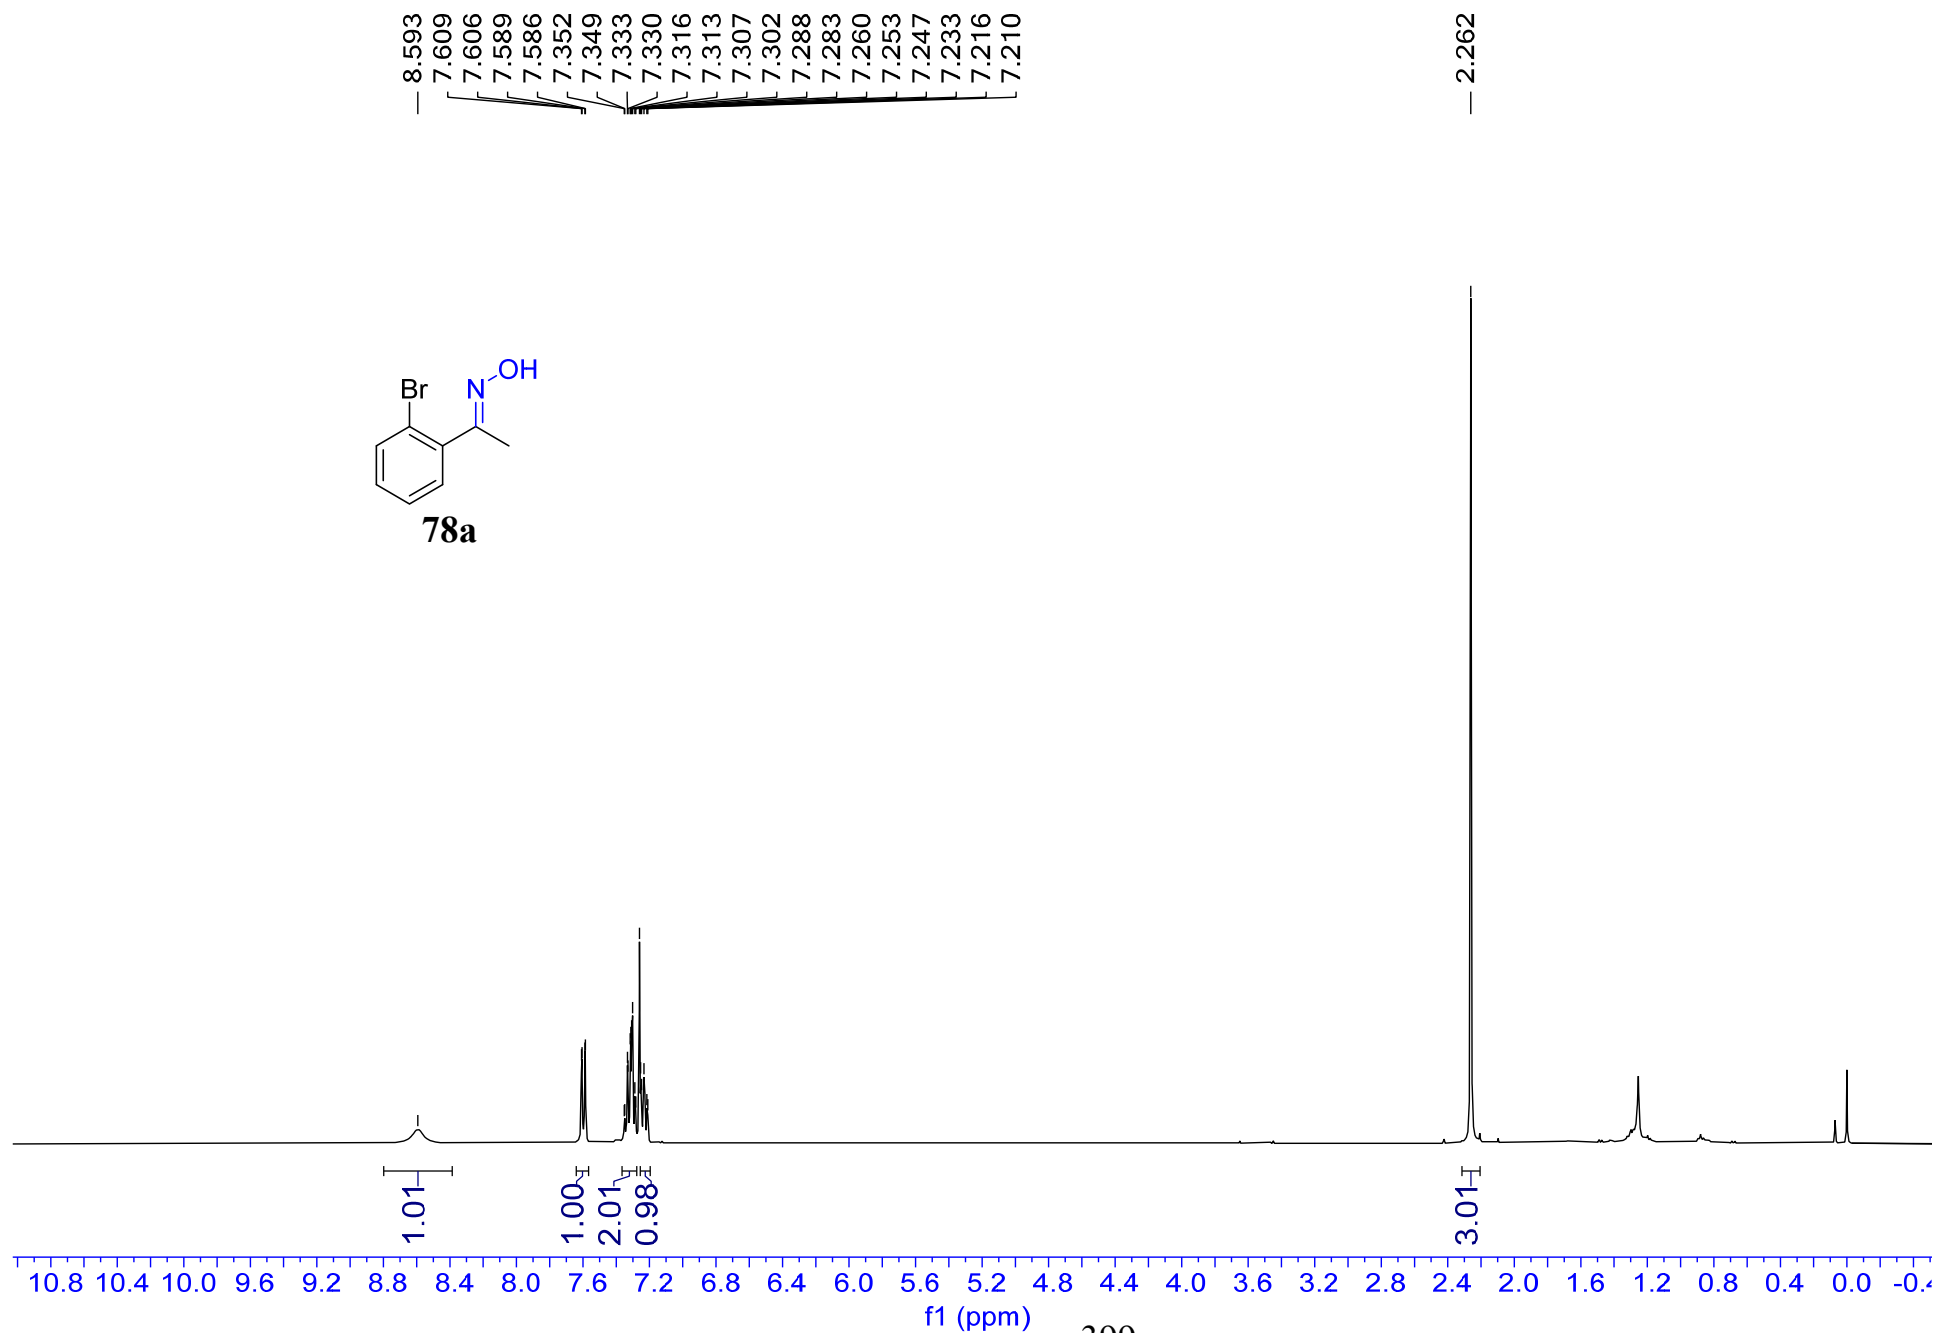

$^{13}\text{C}$  NMR 101 MHz,  $\text{CDCl}_3$

— 158.09

138.86  
— 133.30  
— 130.25  
— 127.57  
121.88

77.48  
77.16  
76.84

— 16.09

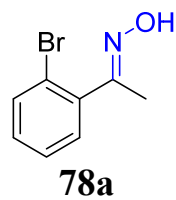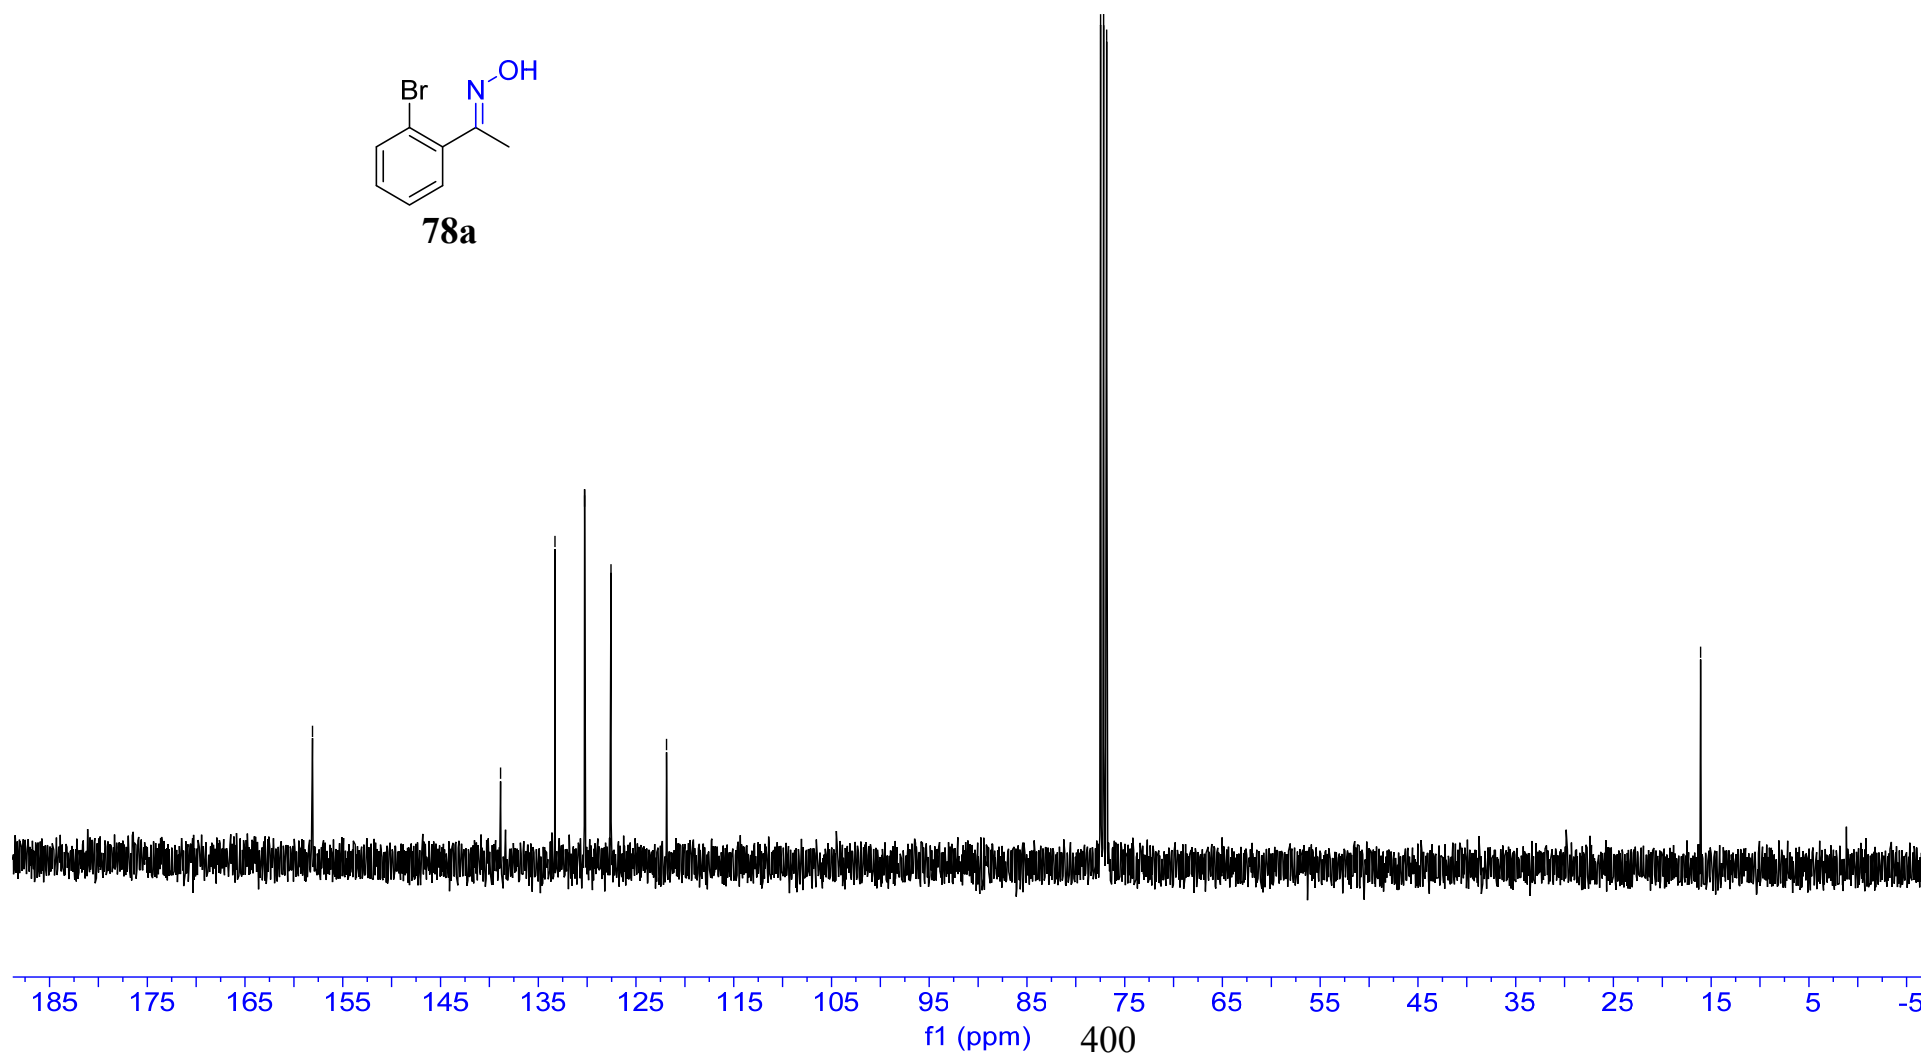

<sup>1</sup>H NMR, 400 MHz, CDCl<sub>3</sub>

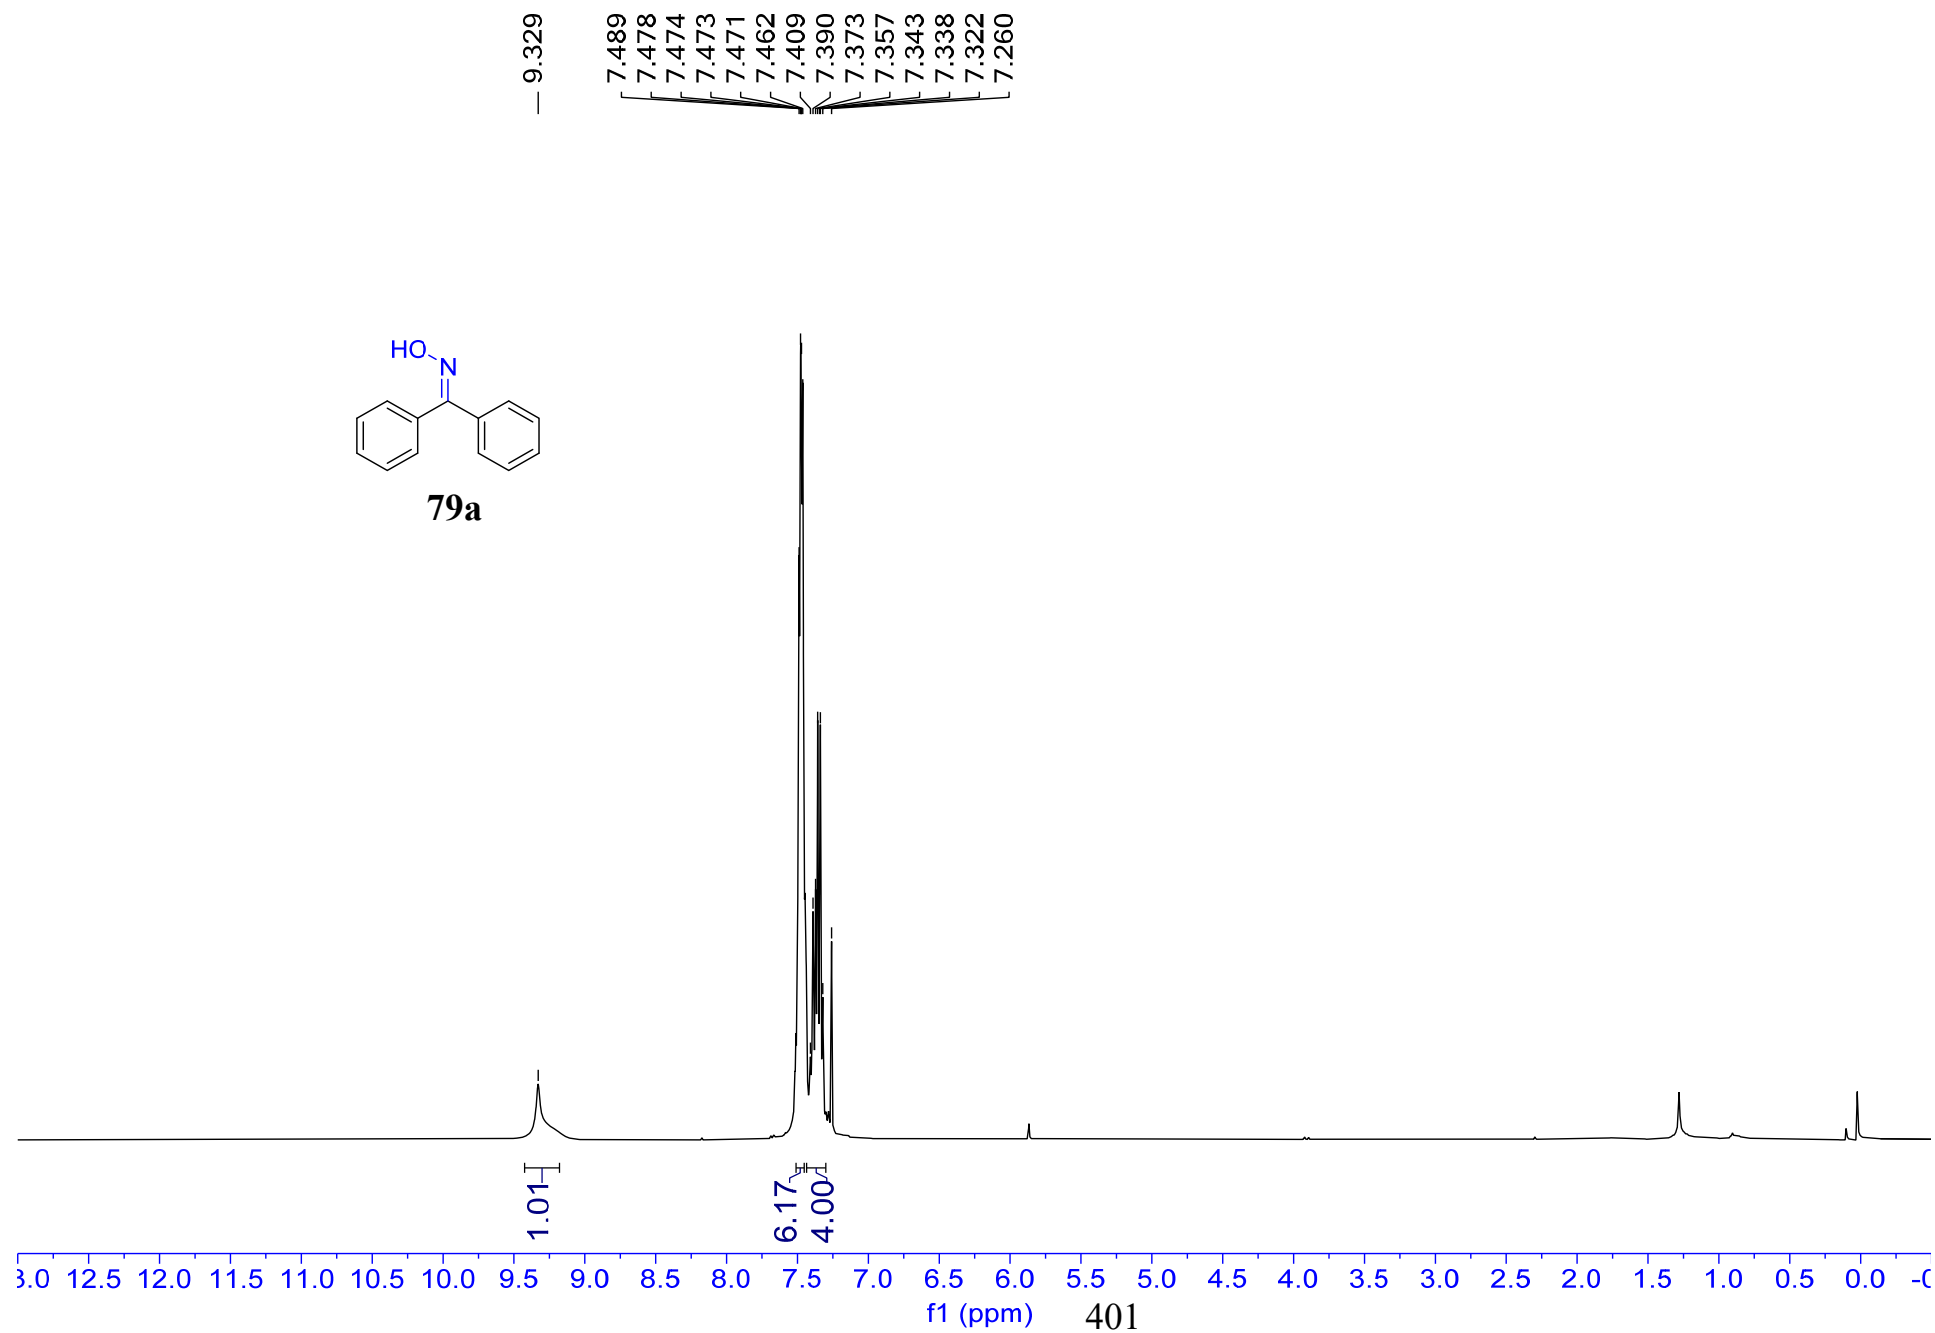

$^{13}\text{C}$  NMR 101 MHz,  $\text{CDCl}_3$

— 158.02

136.29  
132.79  
129.67  
129.38  
129.27  
128.49  
128.37  
128.00

77.48  
77.16  
76.84

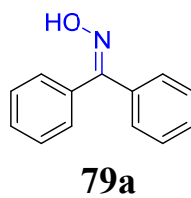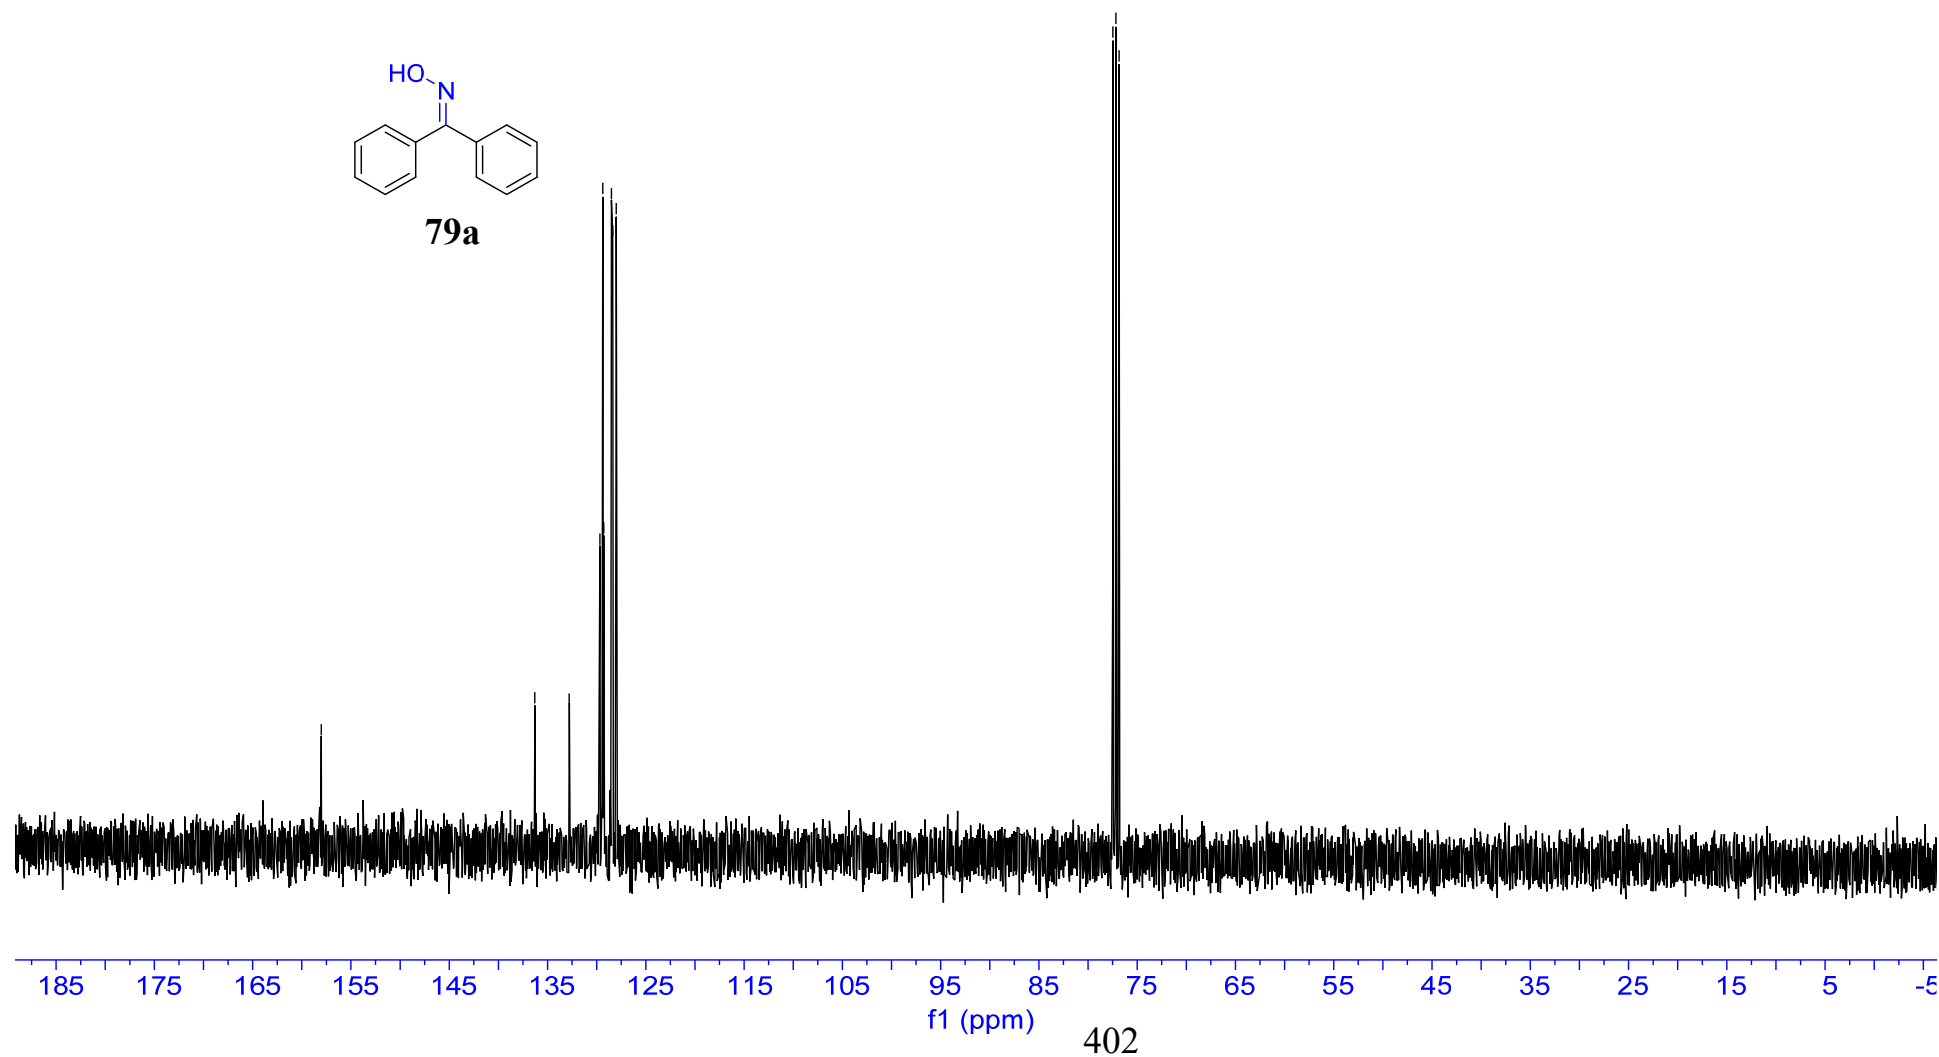

<sup>1</sup>H NMR, 400 MHz, CDCl<sub>3</sub>

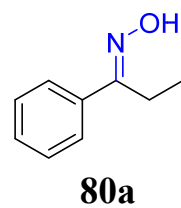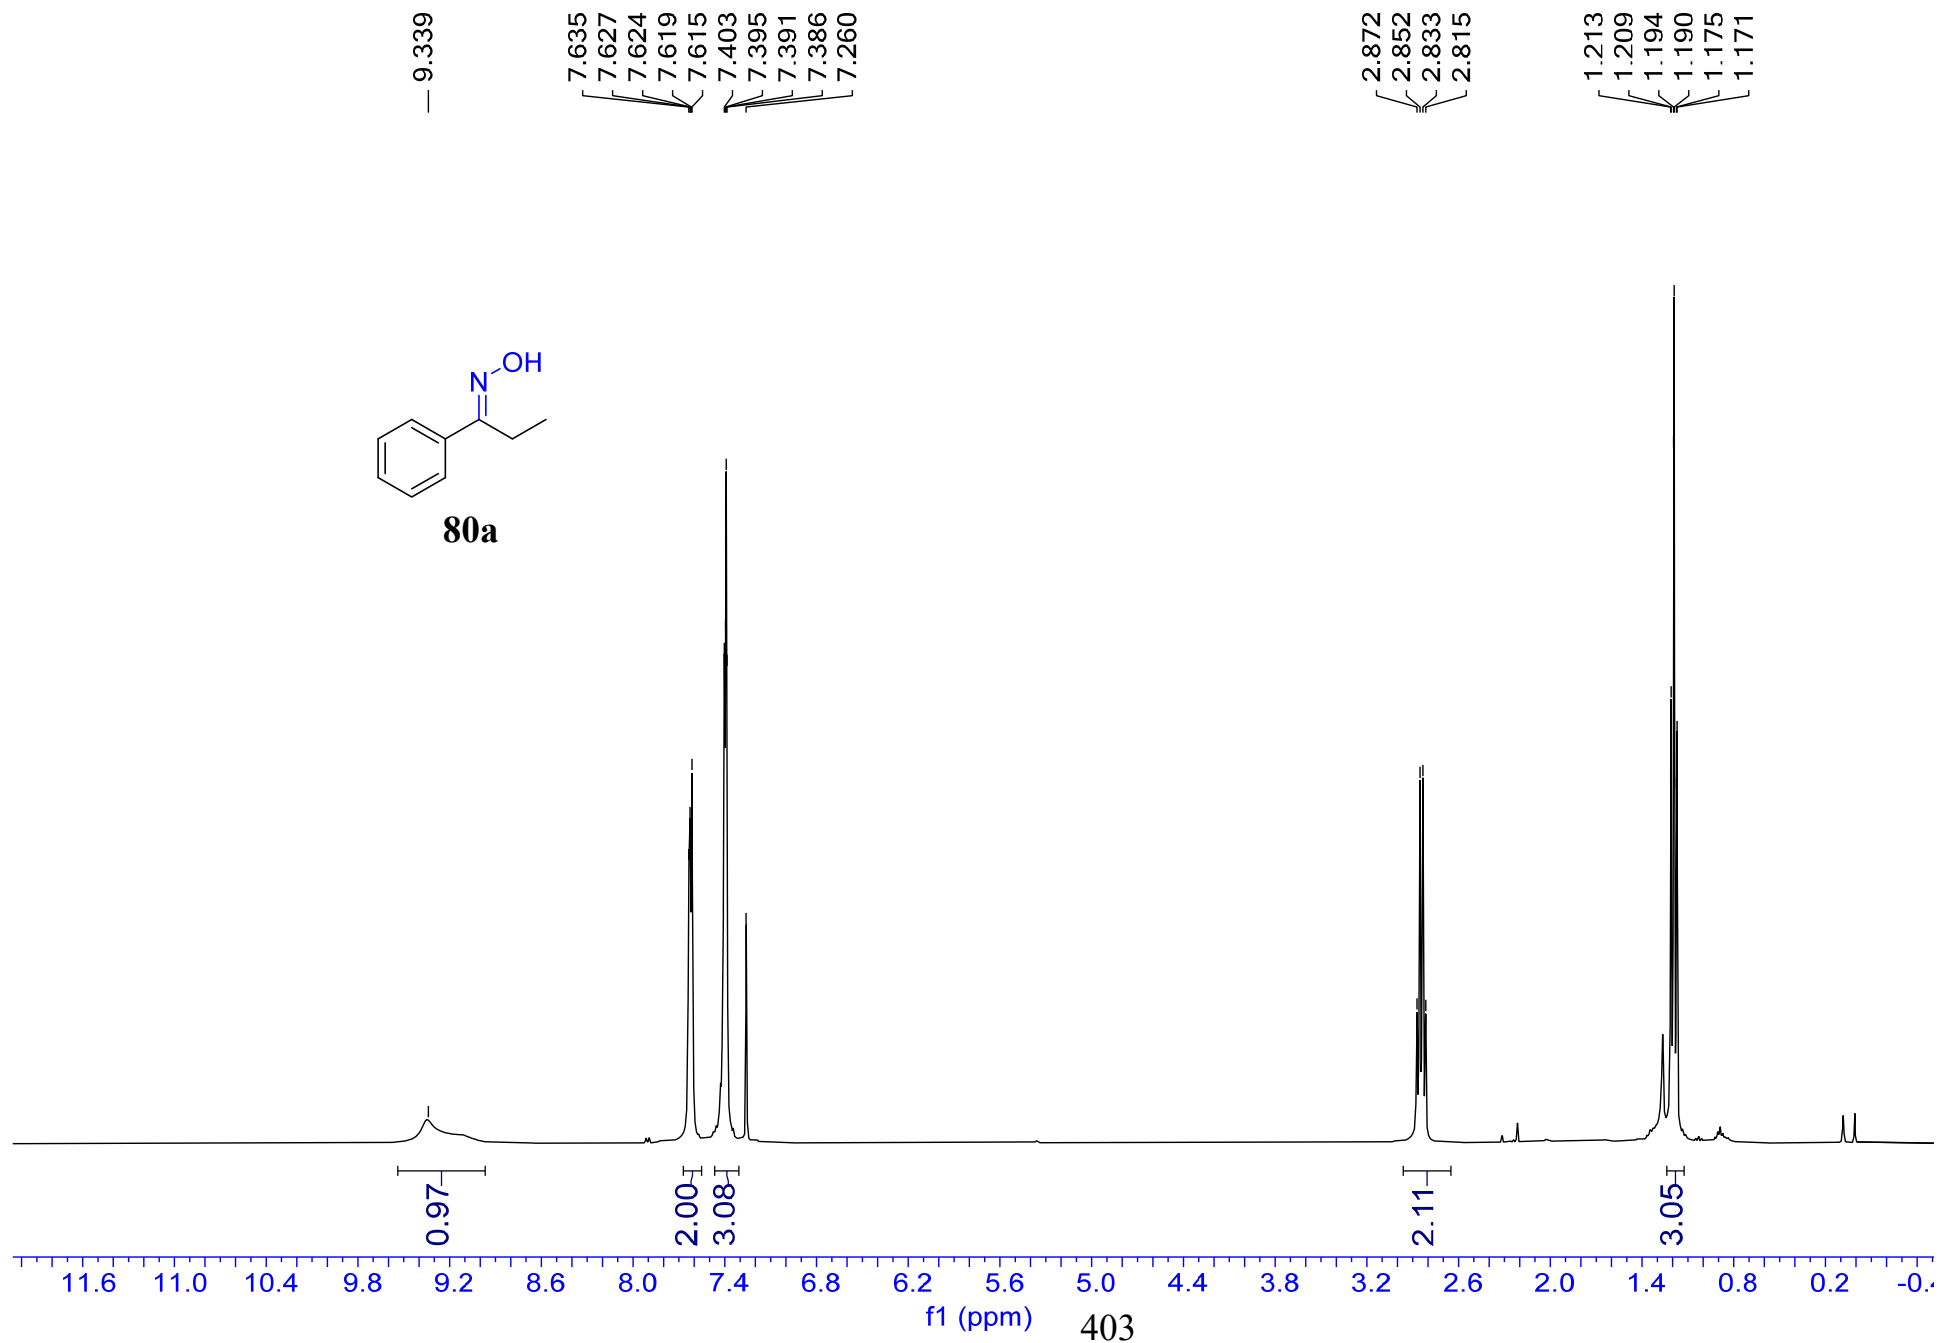

$^{13}\text{C}$  NMR 101 MHz,  $\text{CDCl}_3$

— 160.88

— 135.66

— 129.33

— 128.72

— 126.39

77.48  
77.16  
76.84

— 19.86

— 11.04

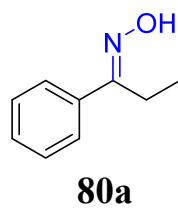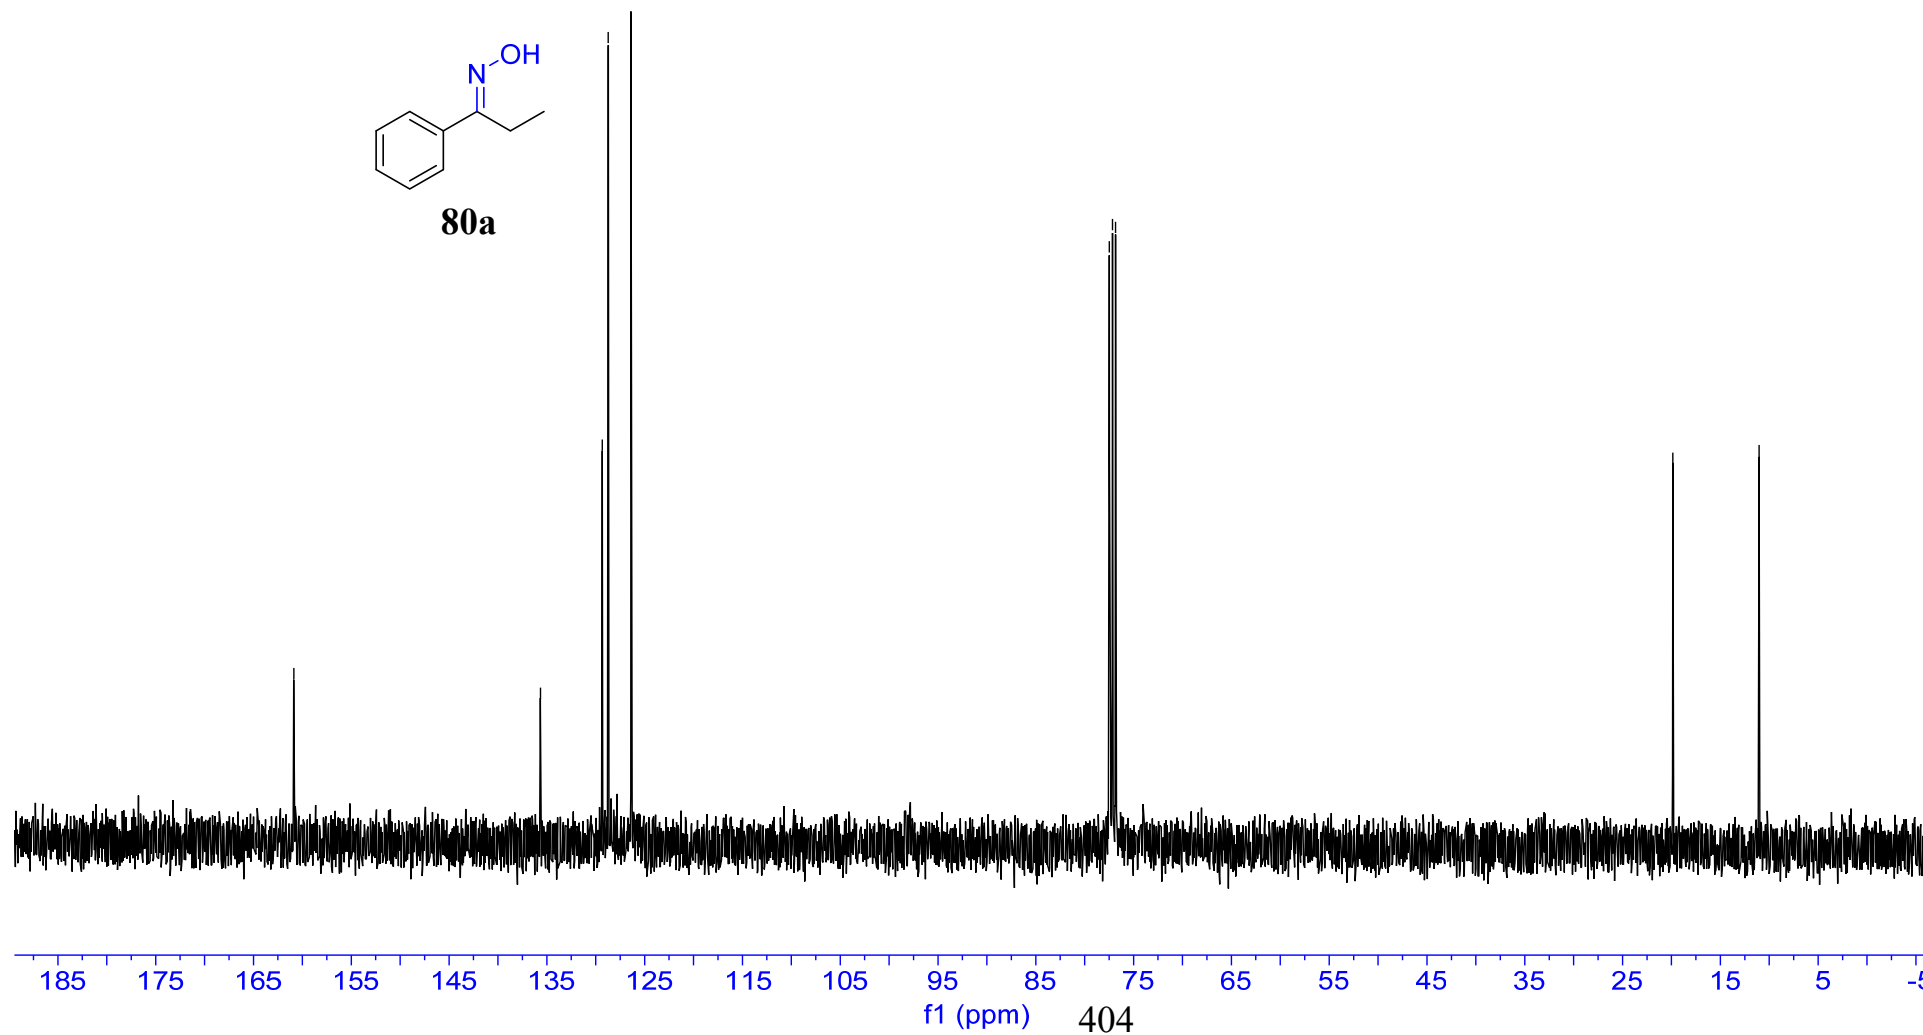



<sup>1</sup>H NMR, 400 MHz, CDCl<sub>3</sub>

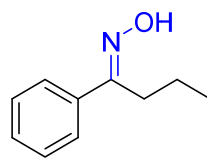

**81a**

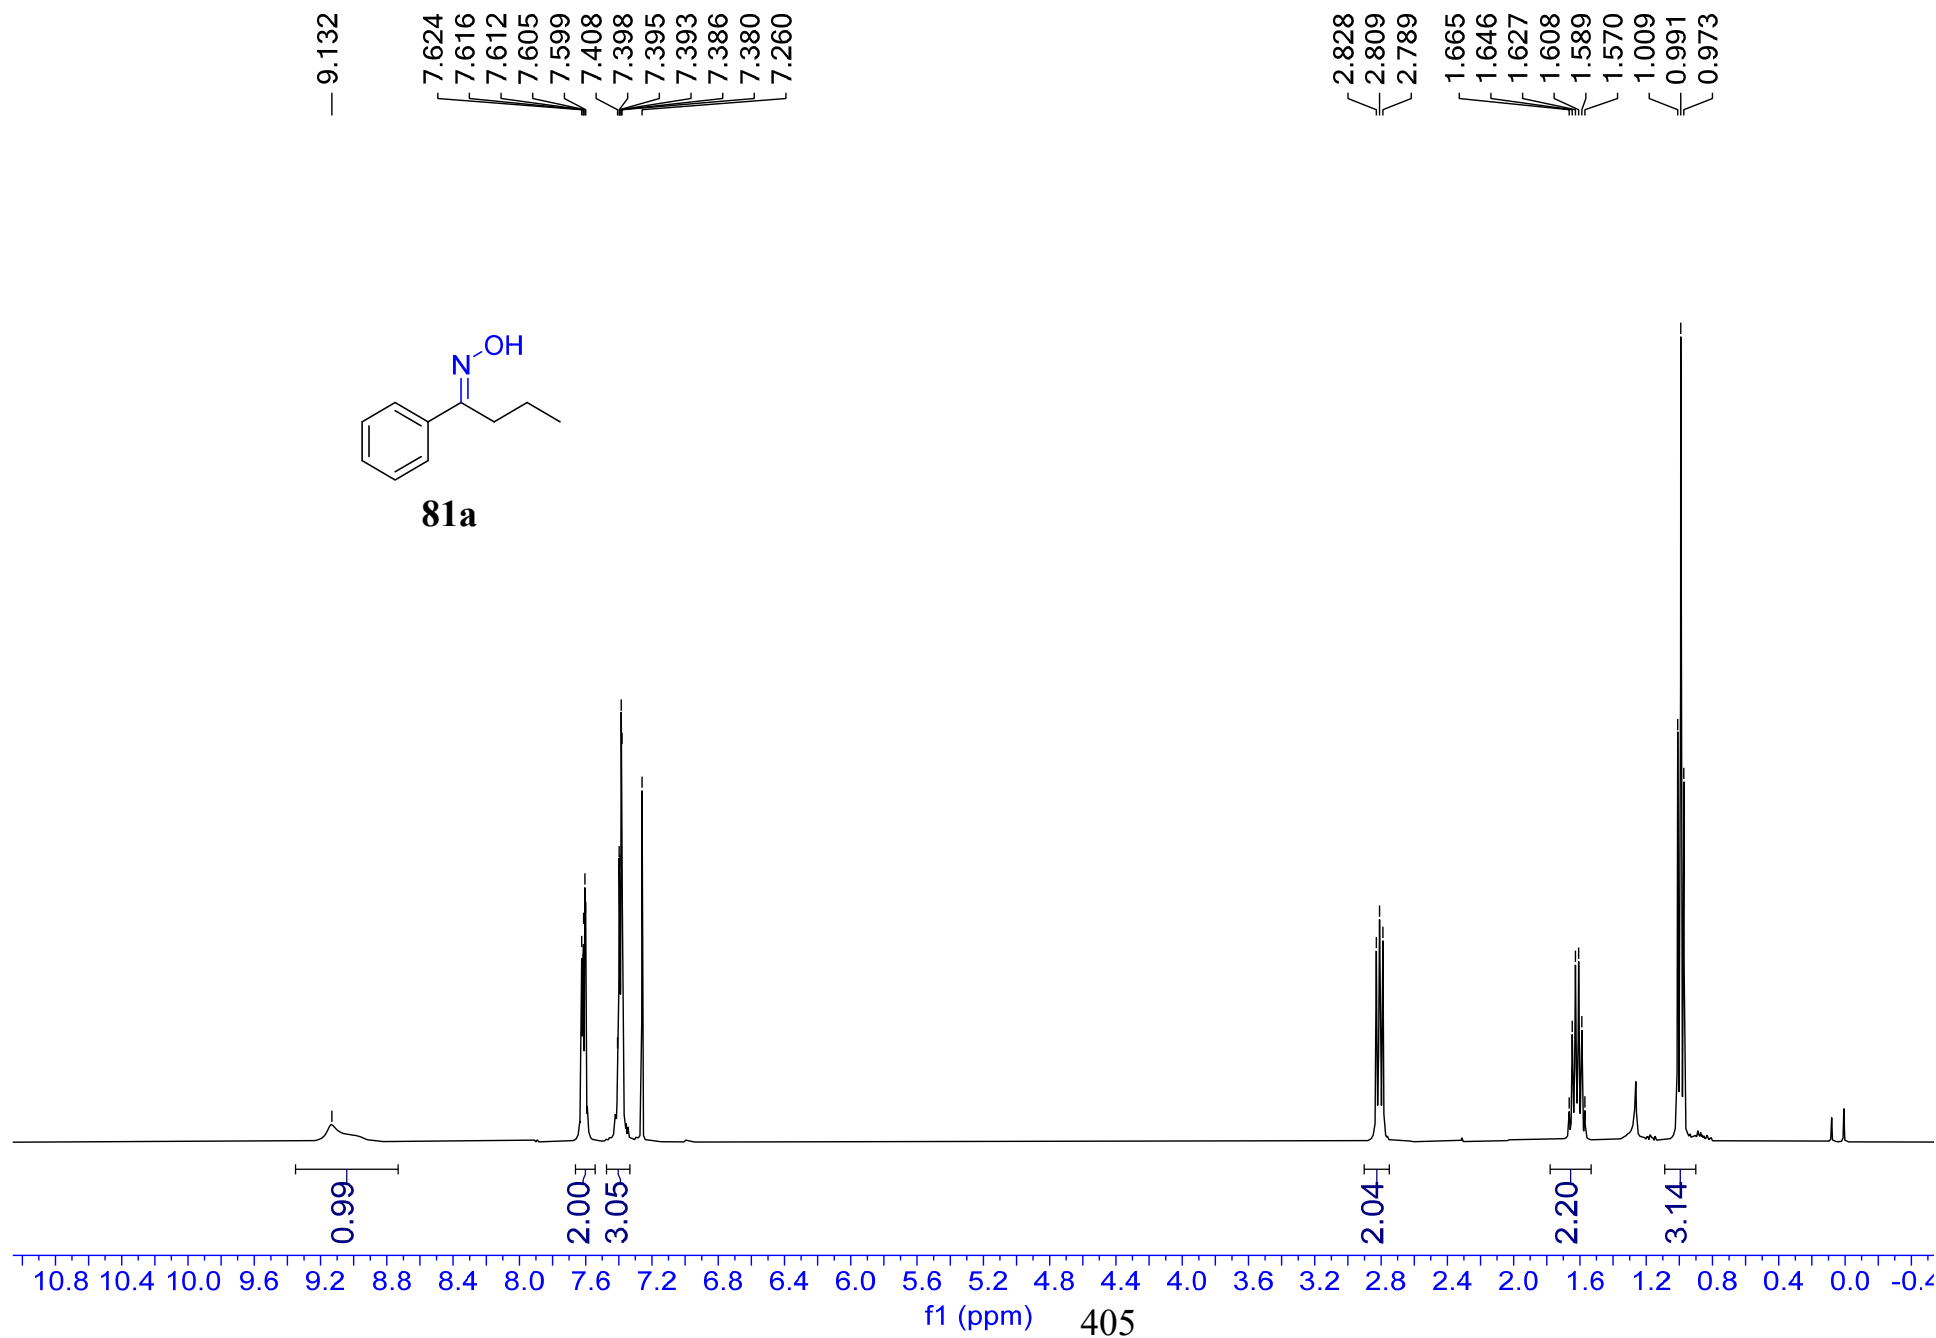

$^{13}\text{C}$  NMR 101 MHz,  $\text{CDCl}_3$

— 159.91

— 136.00

— 129.27

— 128.68

— 126.45

— 77.48

— 77.16

— 76.84

— 28.22

— 19.94

— 14.42

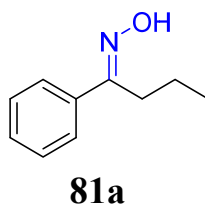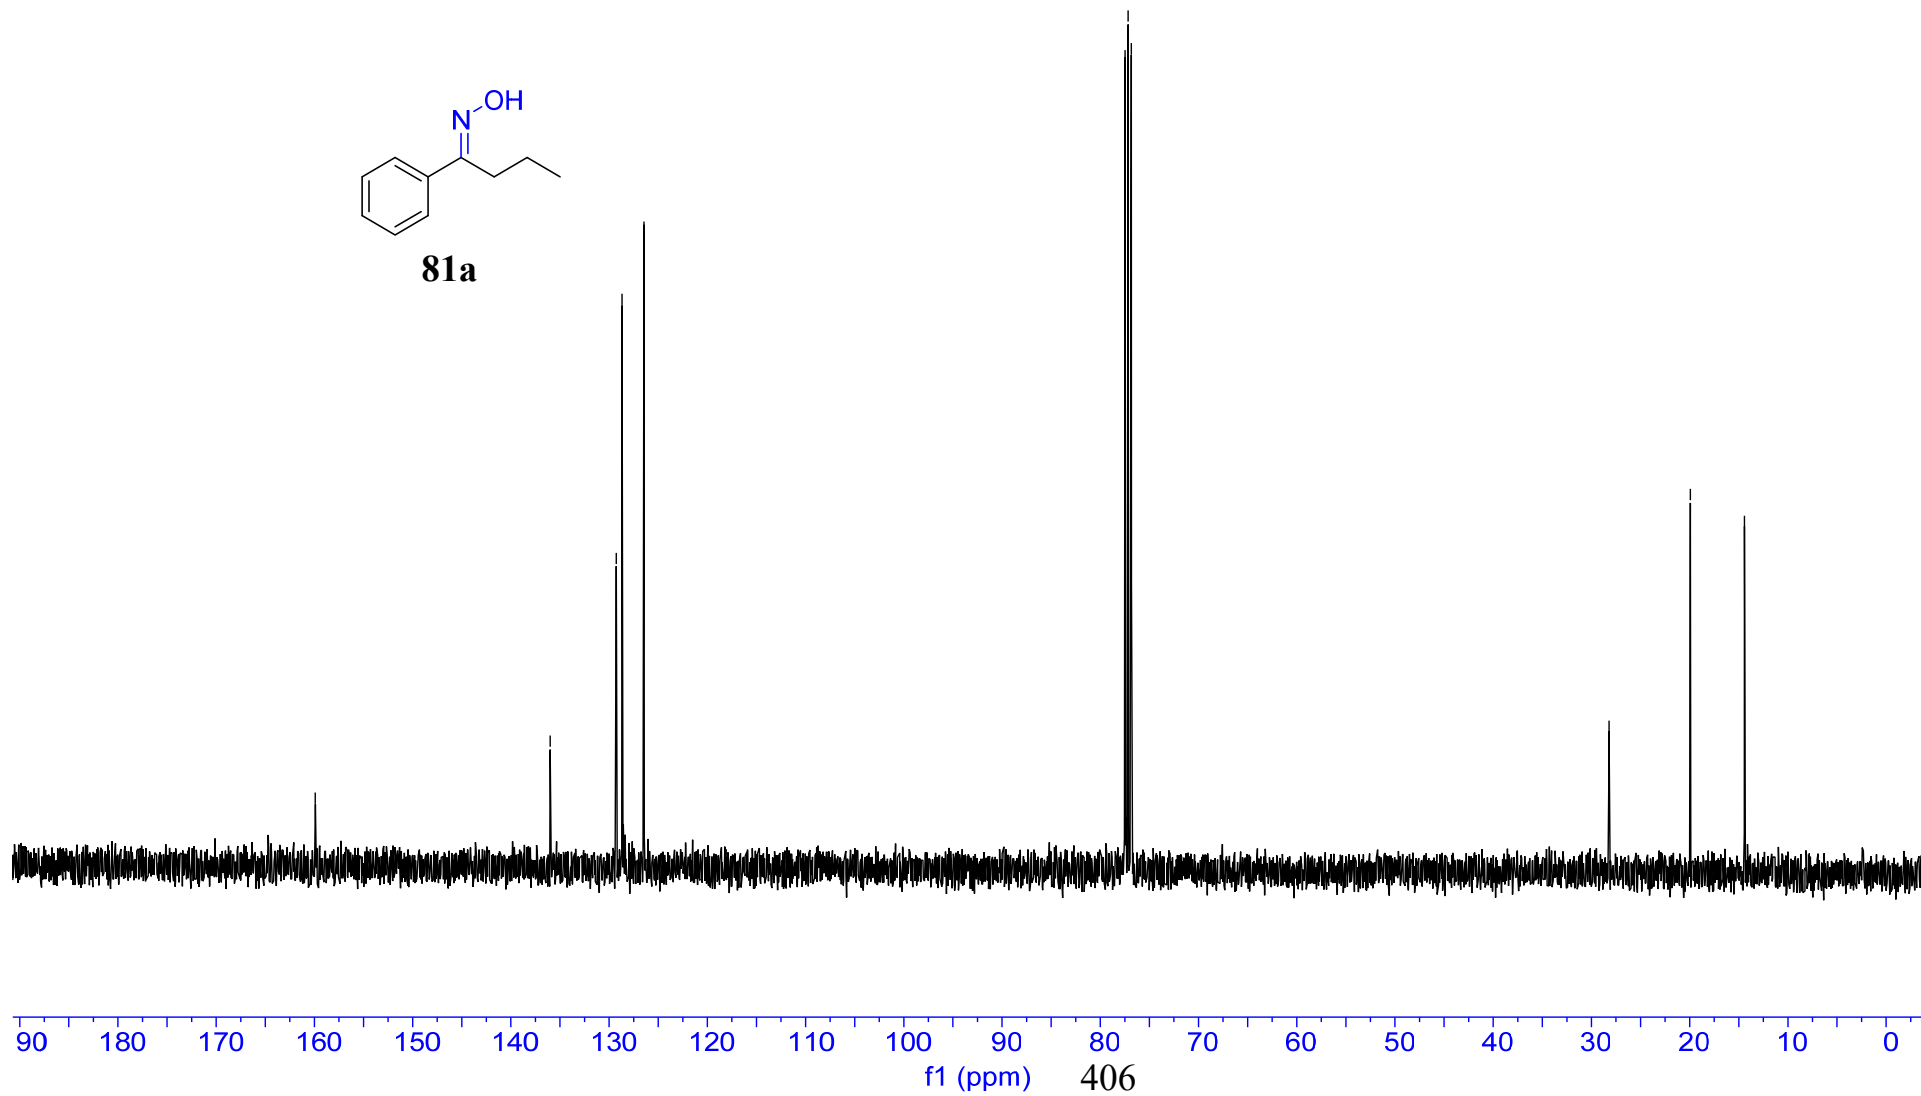

$^1\text{H}$  NMR, 400 MHz,  $\text{CDCl}_3$

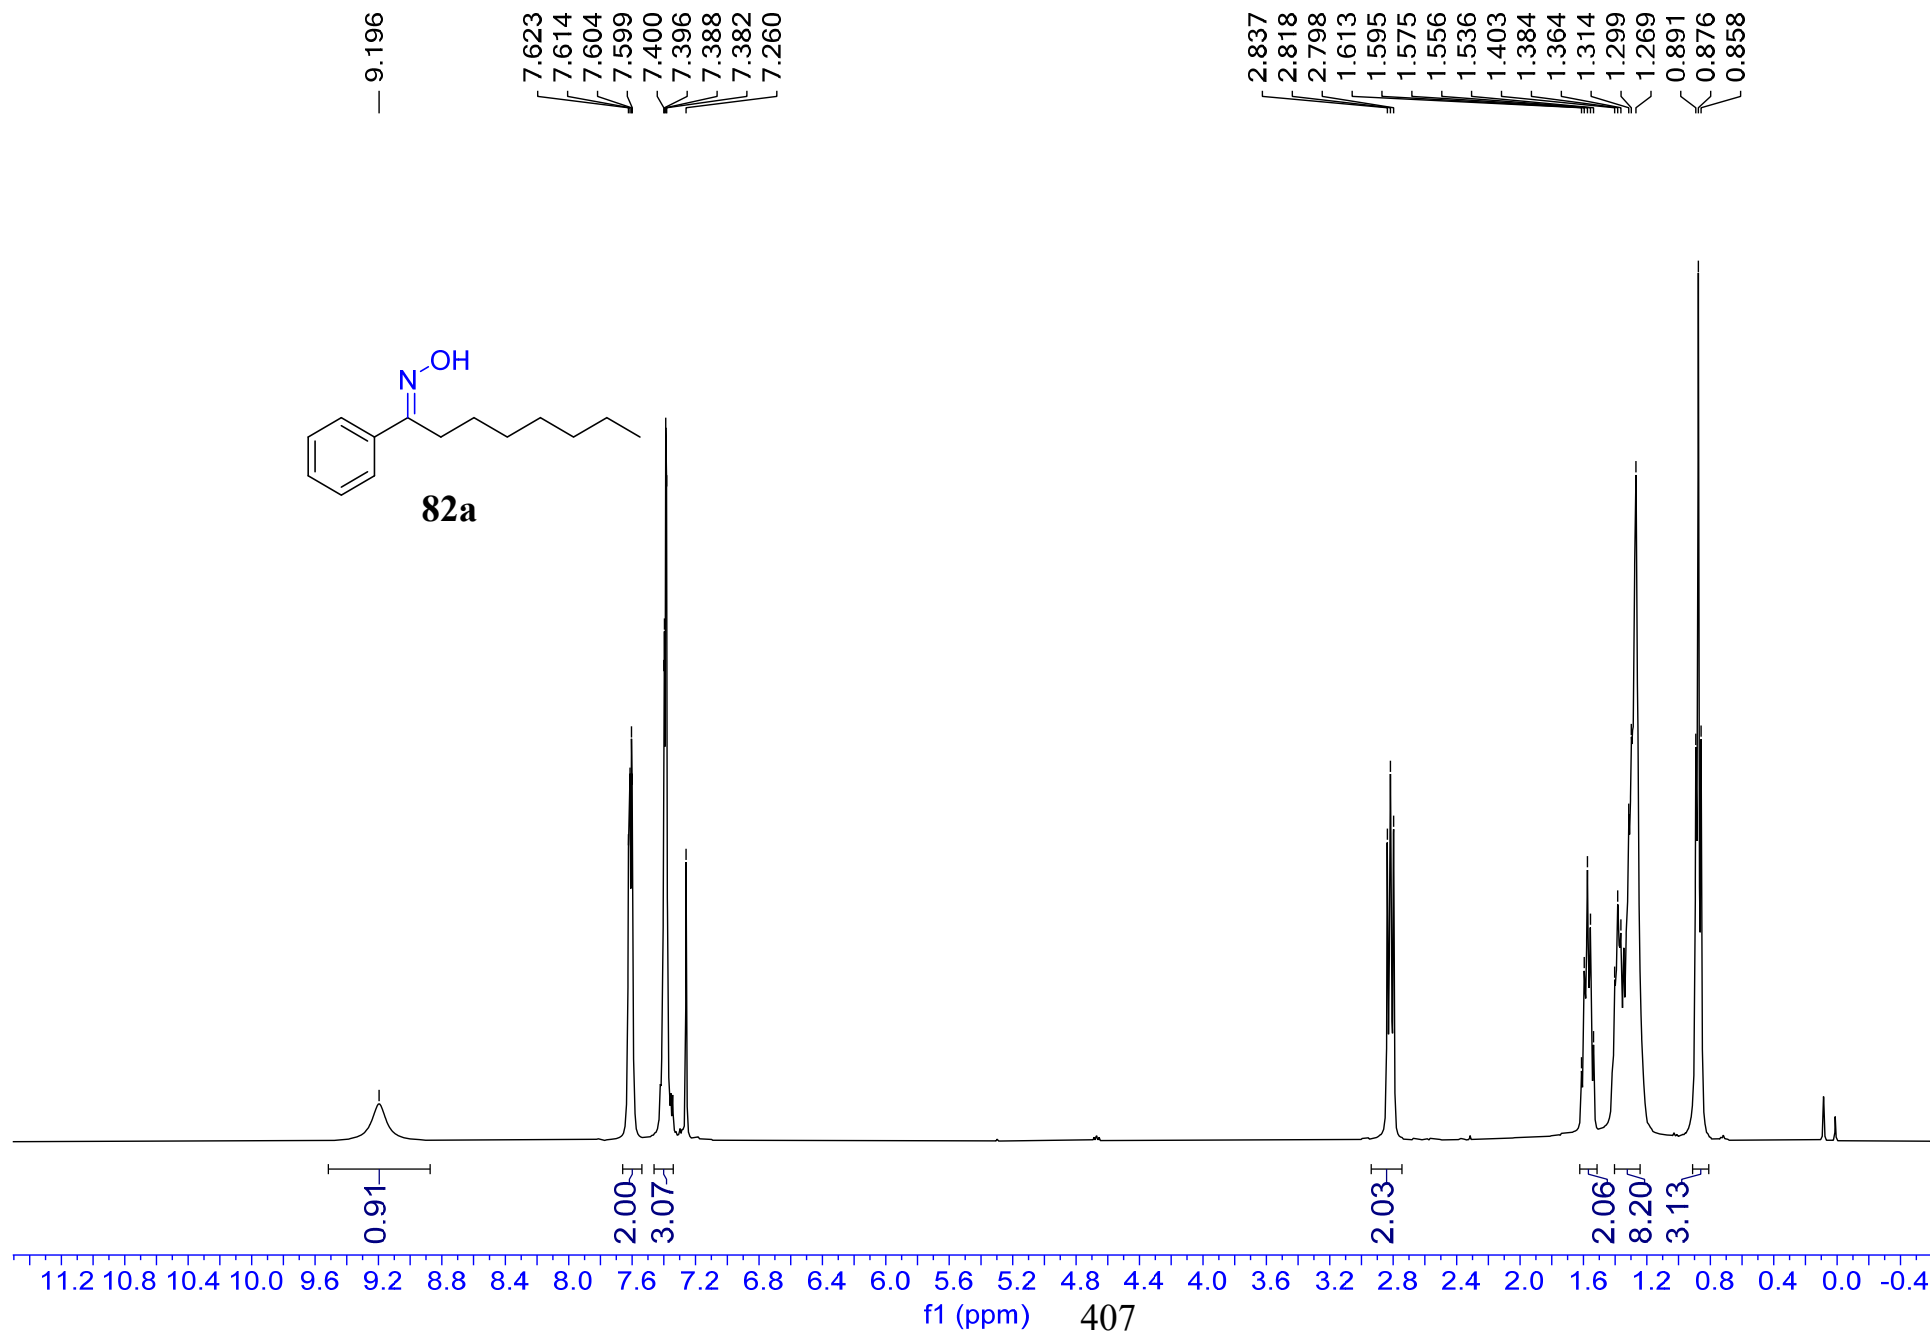

$^{13}\text{C}$  NMR 101 MHz,  $\text{CDCl}_3$

— 160.06

— 136.02

— 129.25

— 128.68

— 126.45

77.48

77.16

76.85

31.88

29.95

29.15

26.50

26.39

22.76

— 14.21

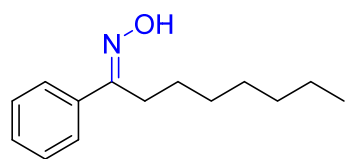

**82a**

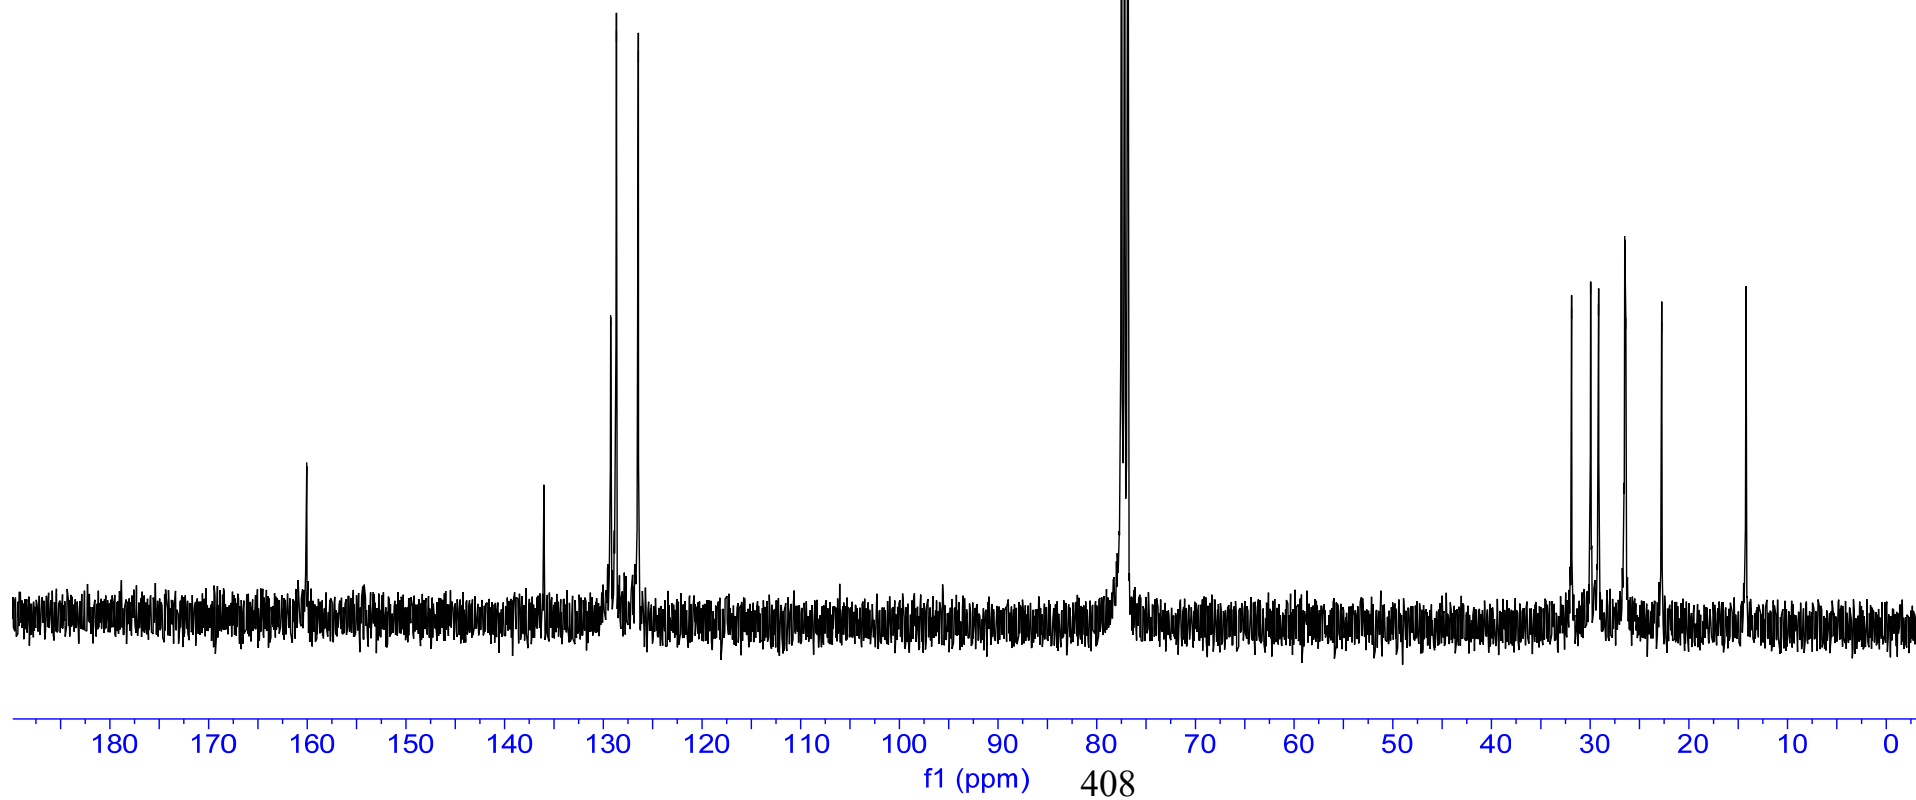

<sup>1</sup>H NMR, 400 MHz, CDCl<sub>3</sub>

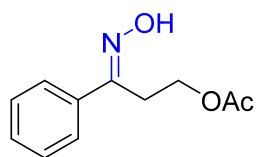

**83a**

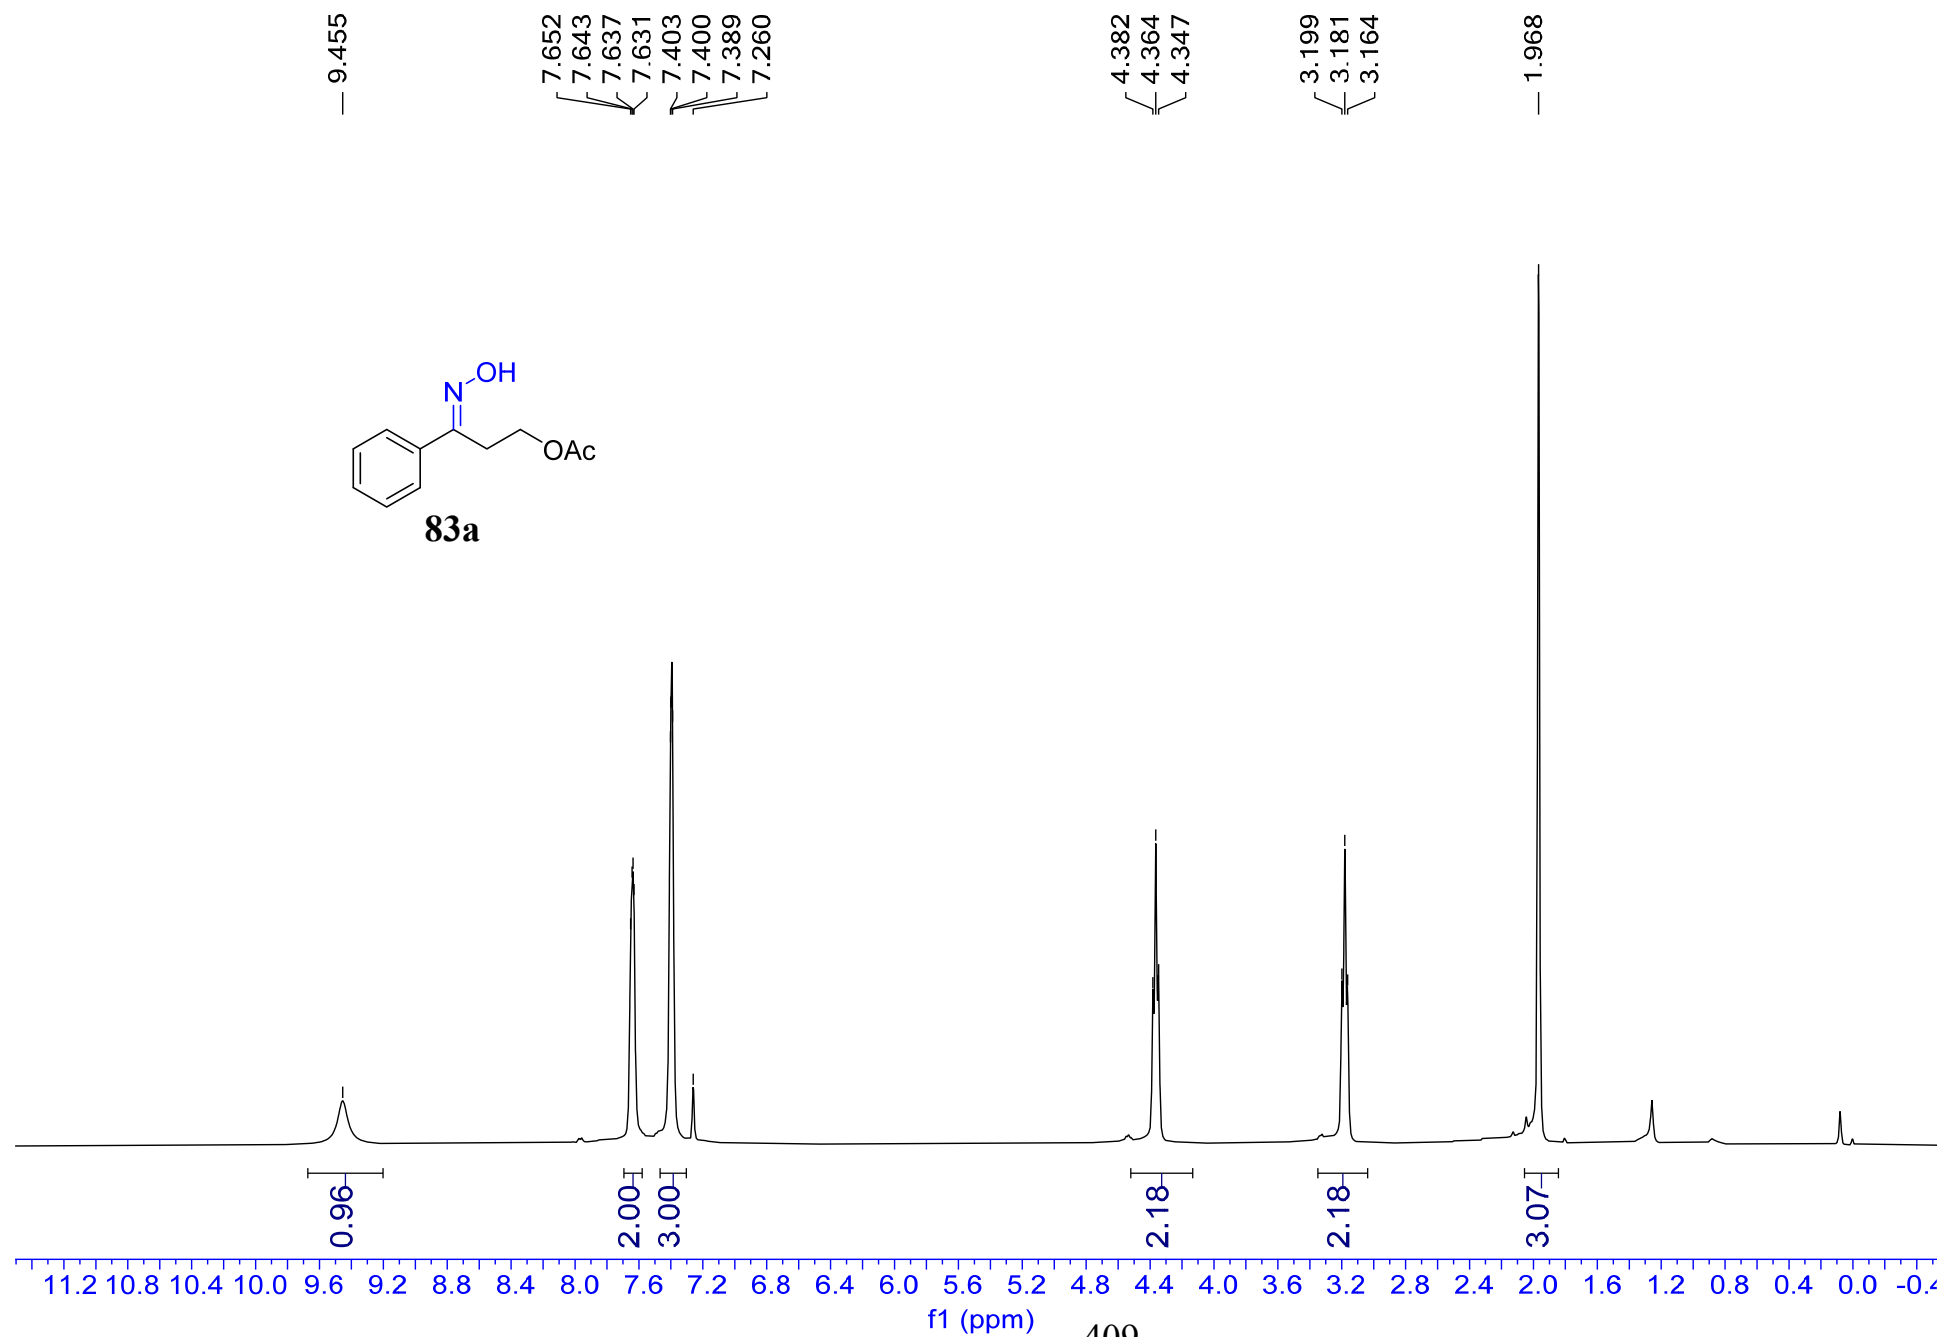

$^{13}\text{C}$  NMR 101 MHz,  $\text{CDCl}_3$

— 171.22

— 156.20

— 135.59

— 129.58

— 128.77

— 126.43

77.48

77.16

76.84

— 60.94

— 26.48

— 20.97



**83a**

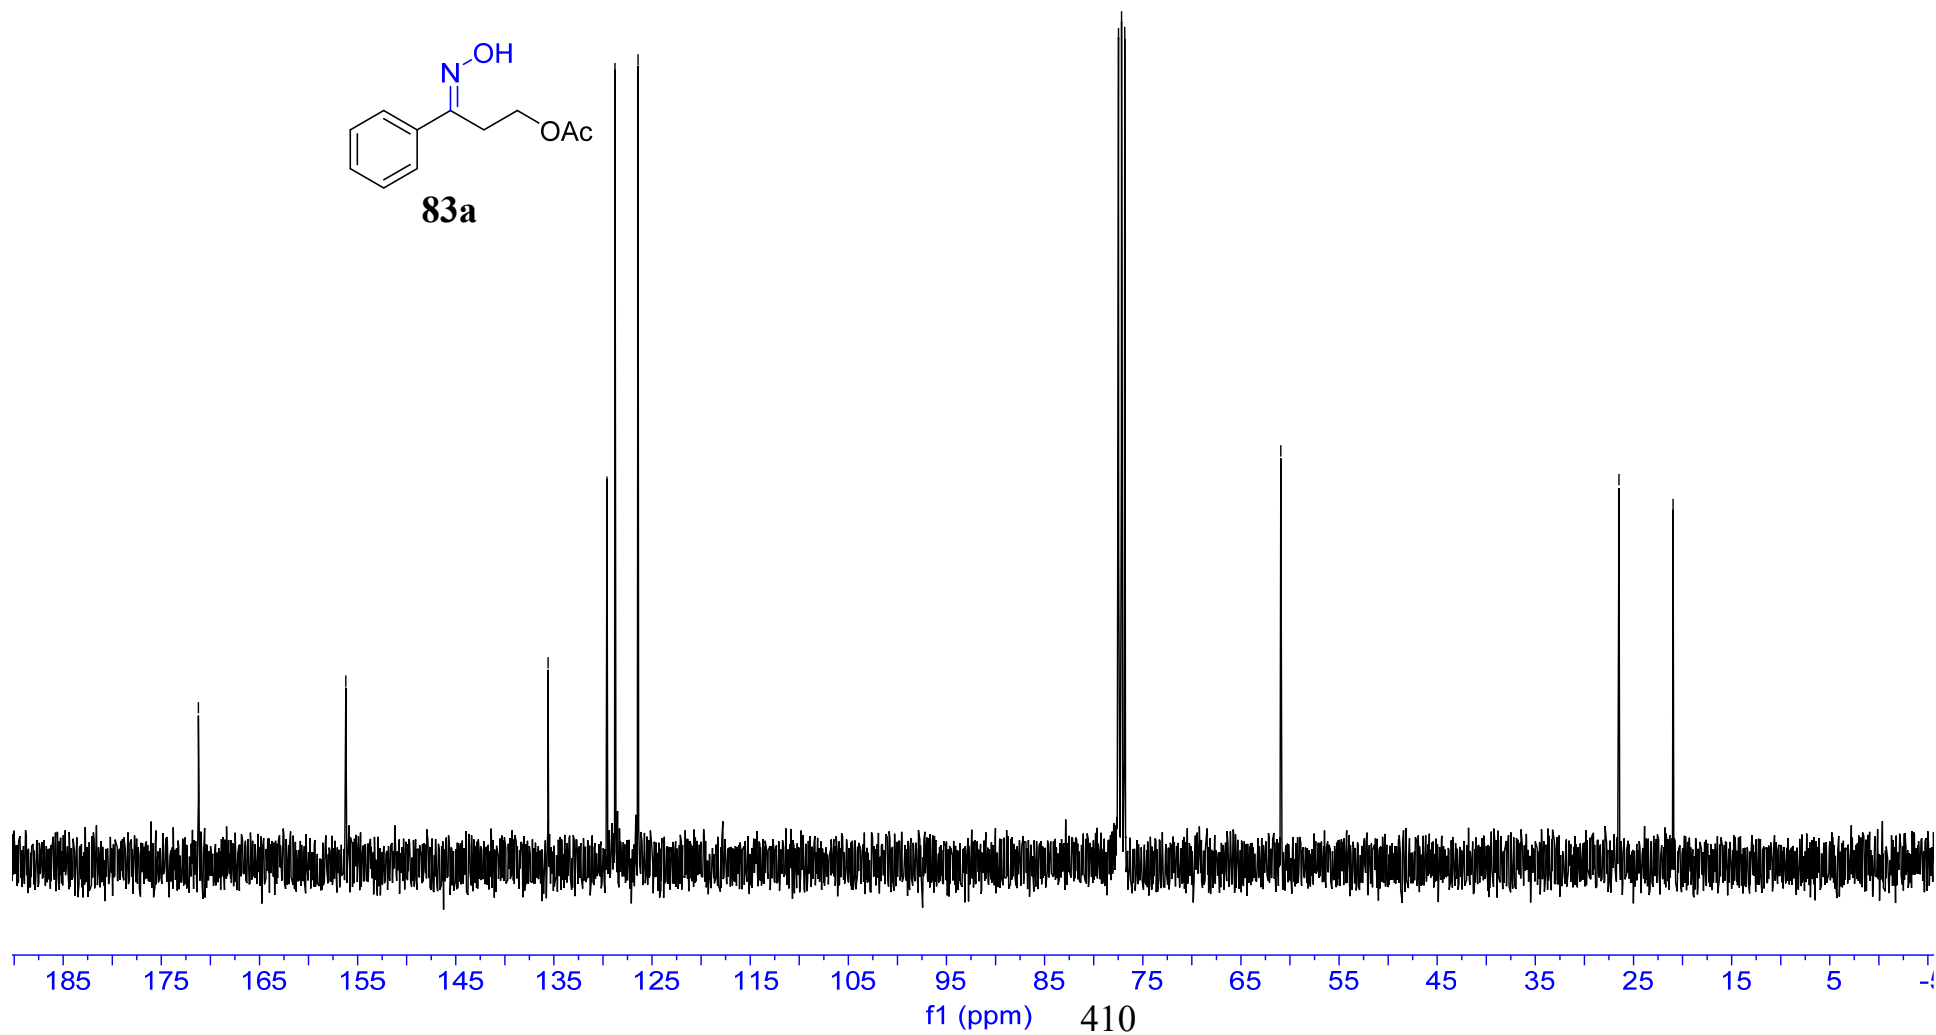

<sup>1</sup>H NMR, 400 MHz, CDCl<sub>3</sub>

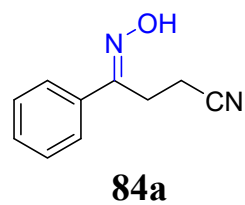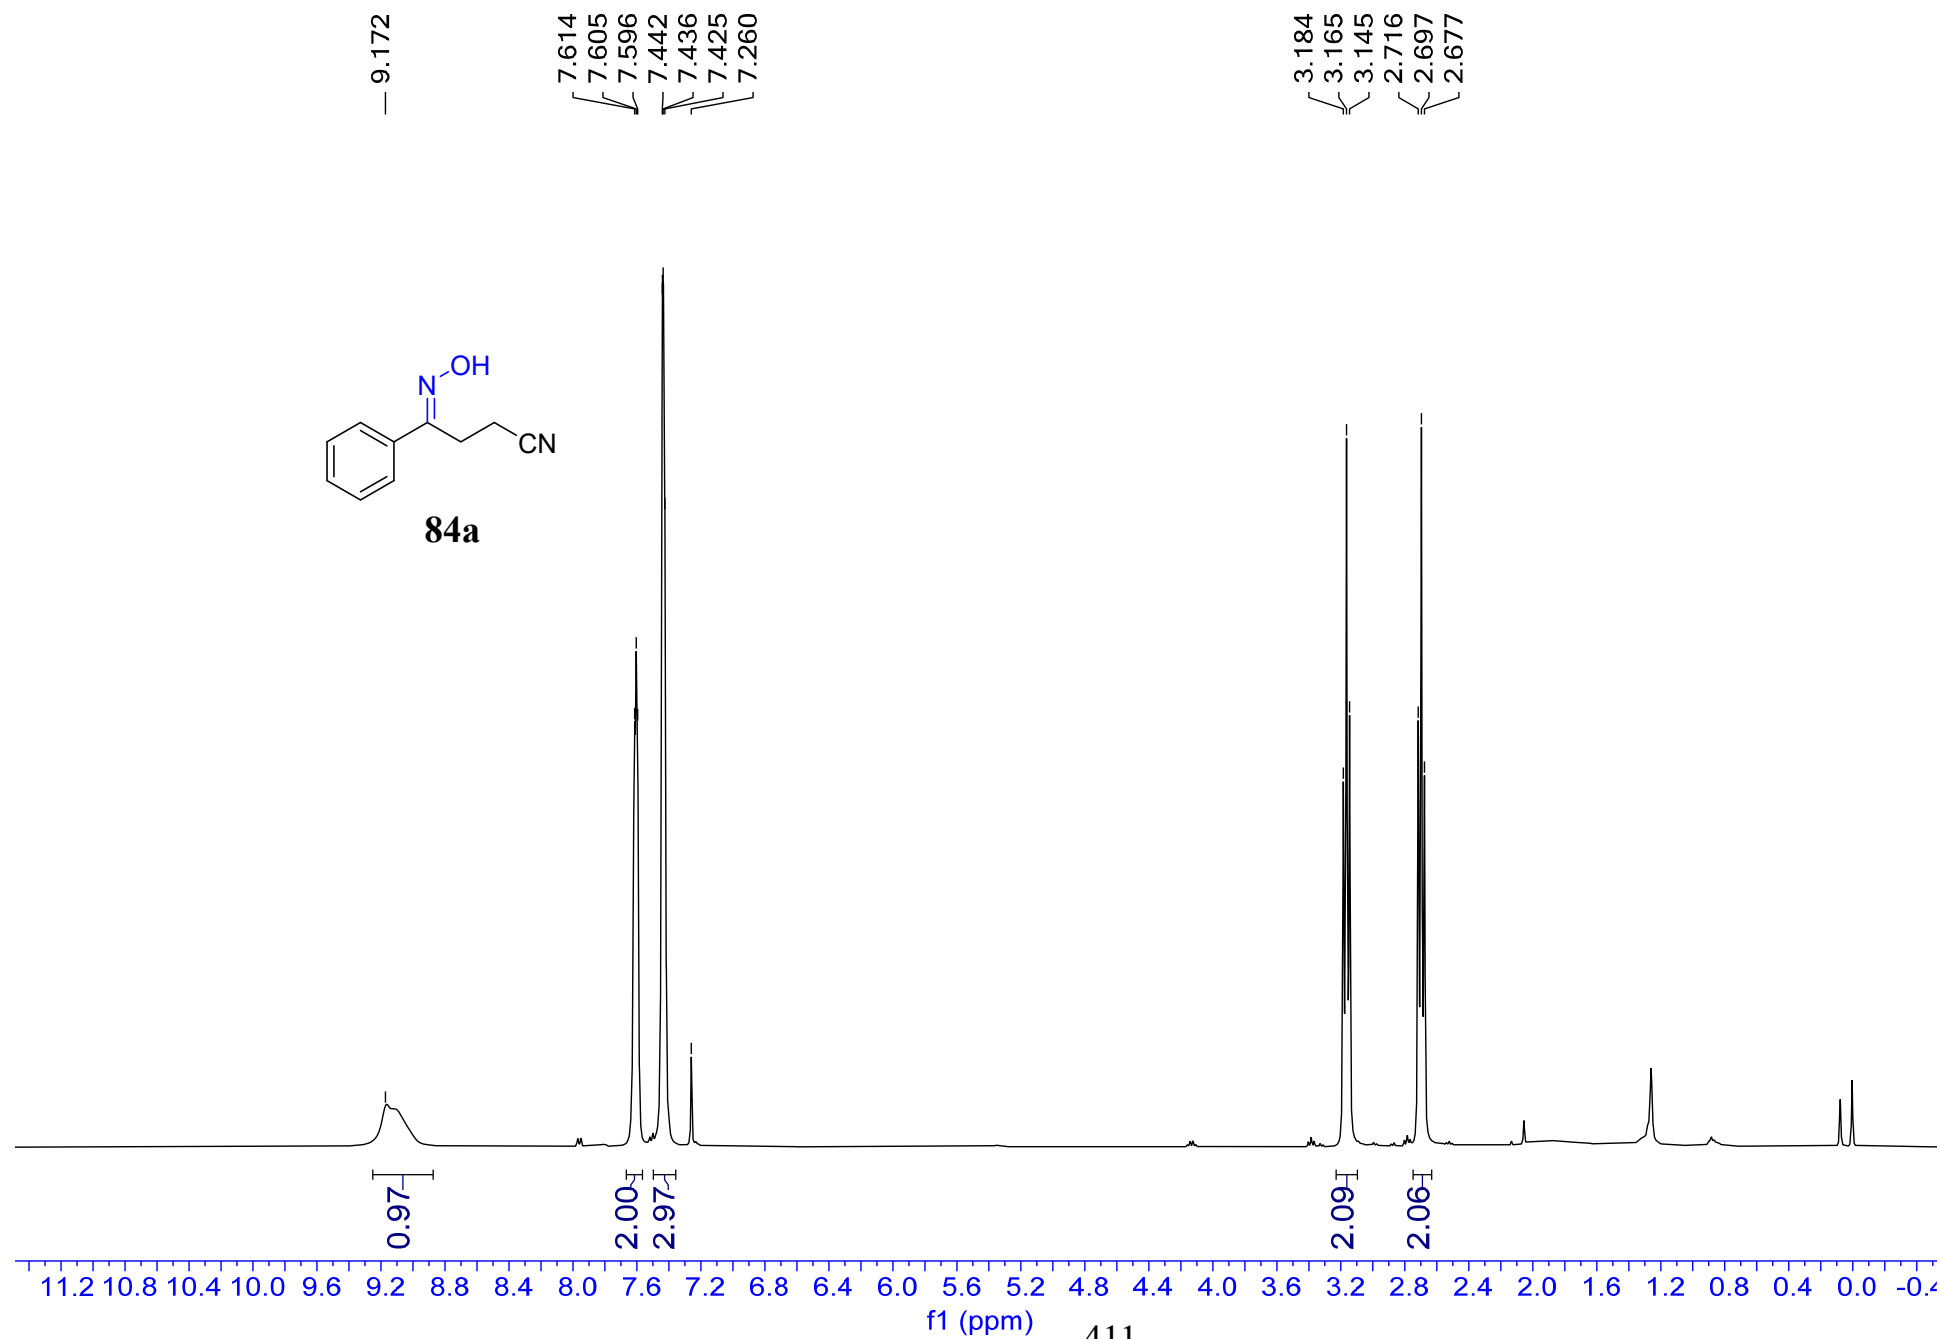

$^{13}\text{C}$  NMR 101 MHz,  $\text{CDCl}_3$

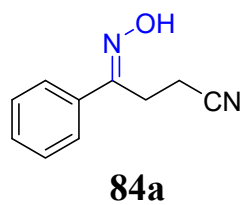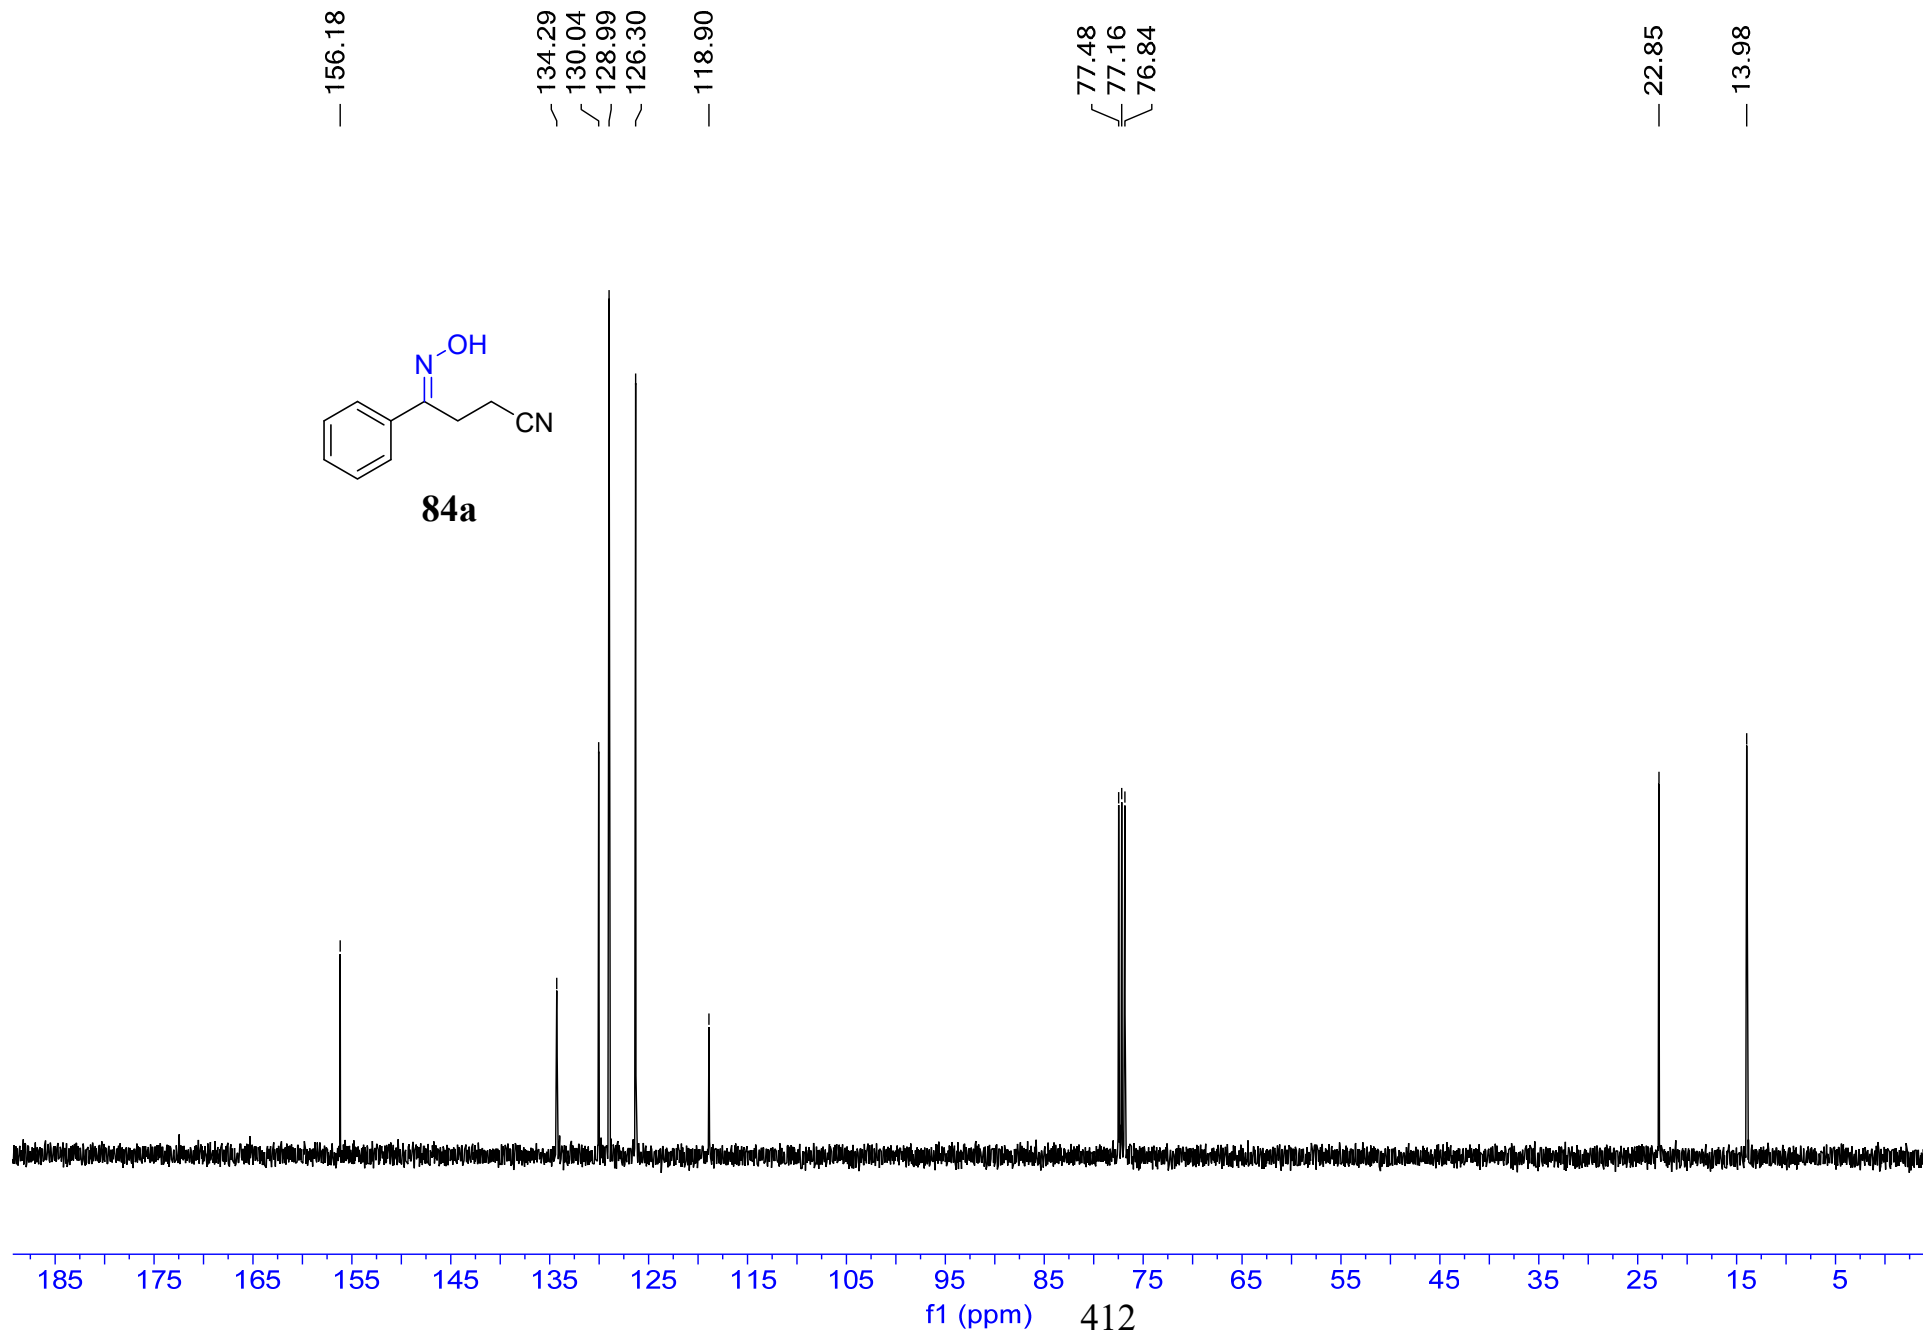



<sup>1</sup>H NMR, 400 MHz, CDCl<sub>3</sub>

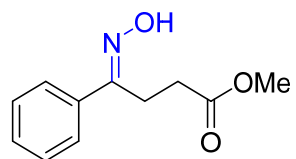

**85a**

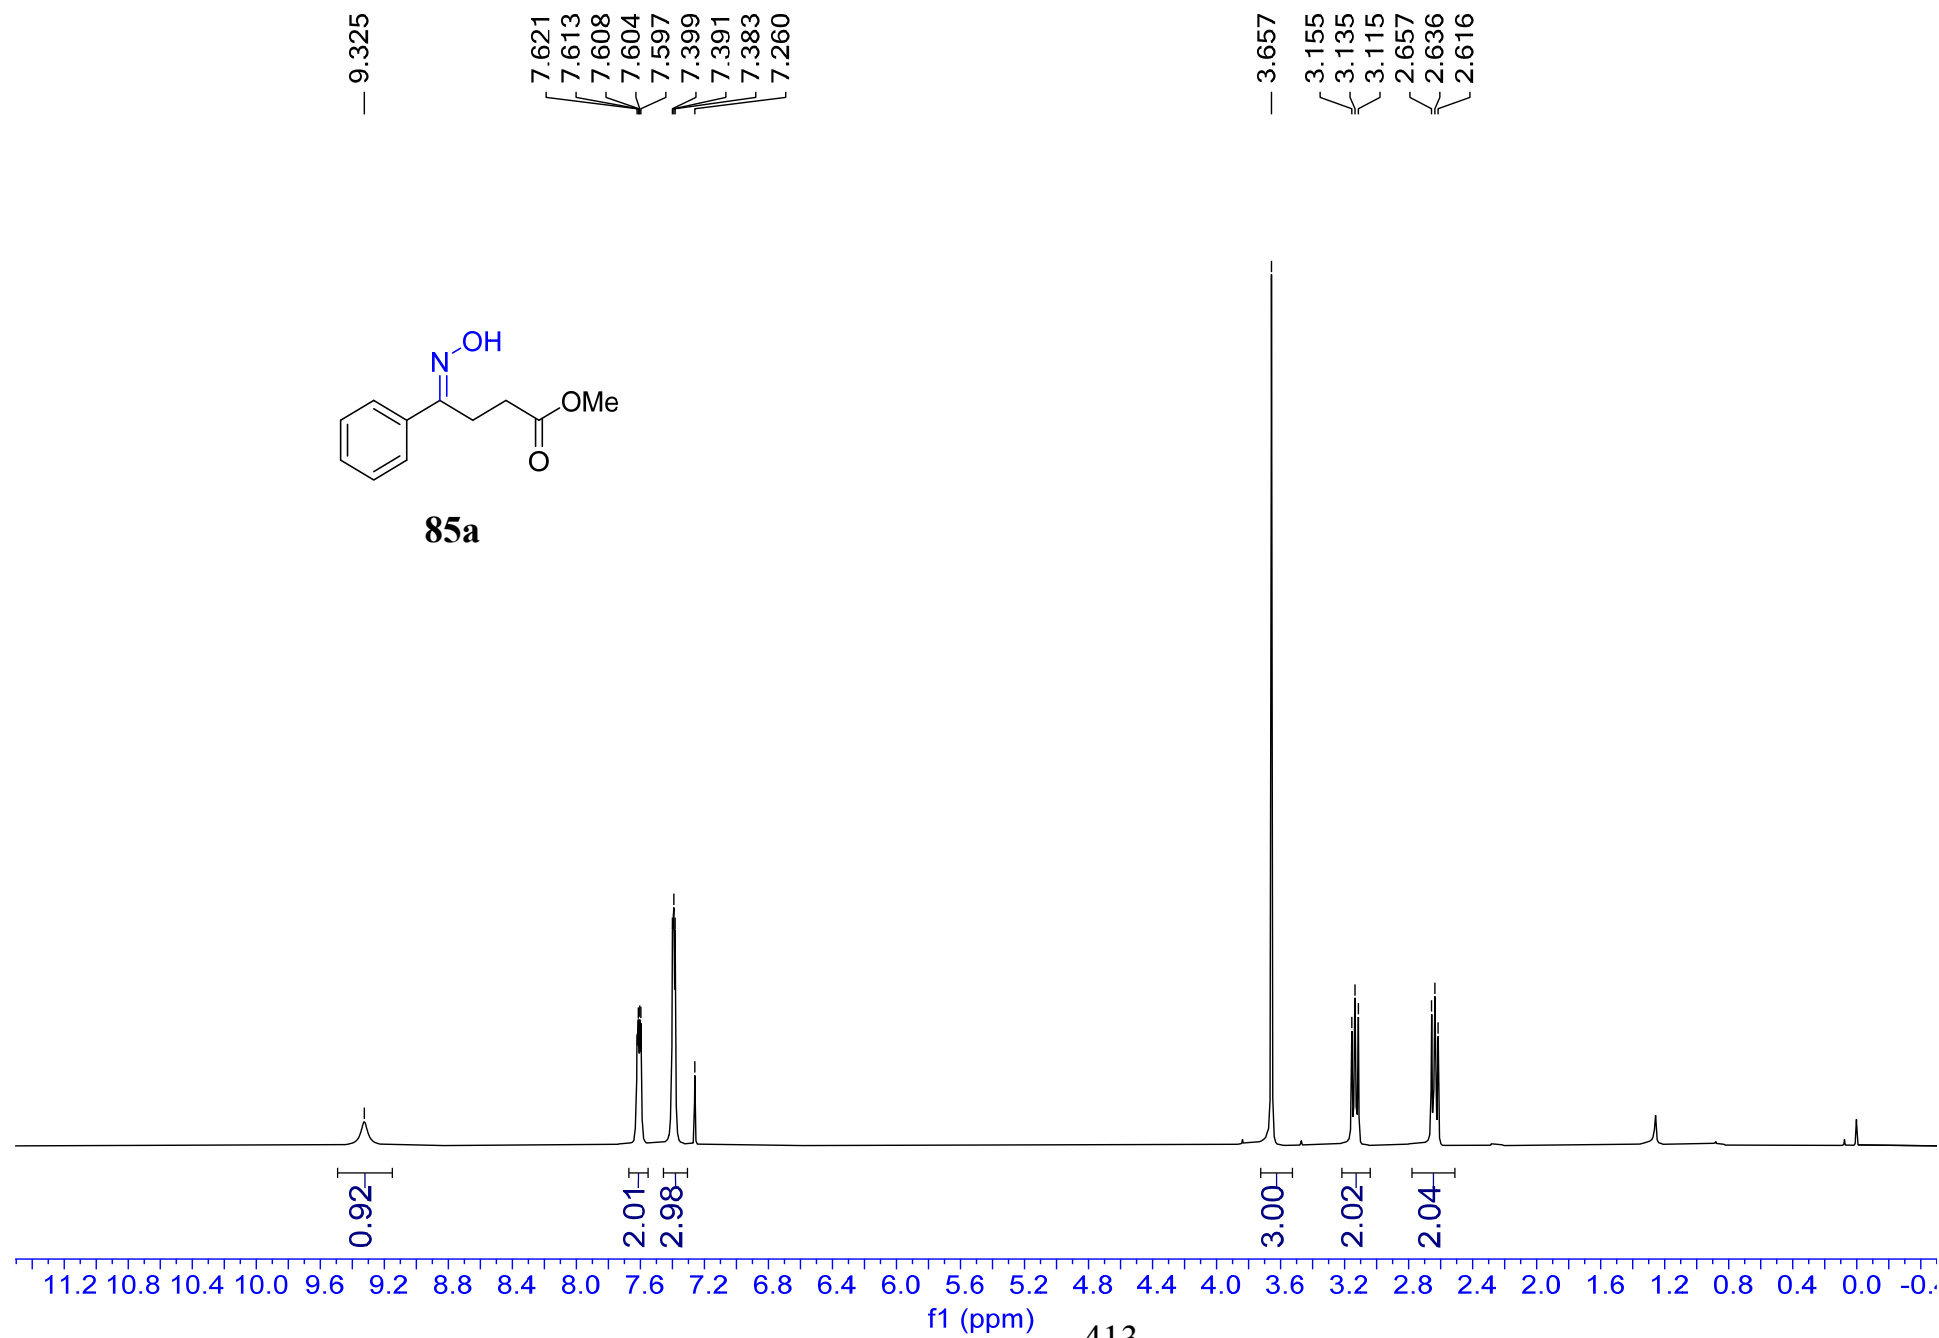

$^{13}\text{C}$  NMR 101 MHz,  $\text{CDCl}_3$



**85a**

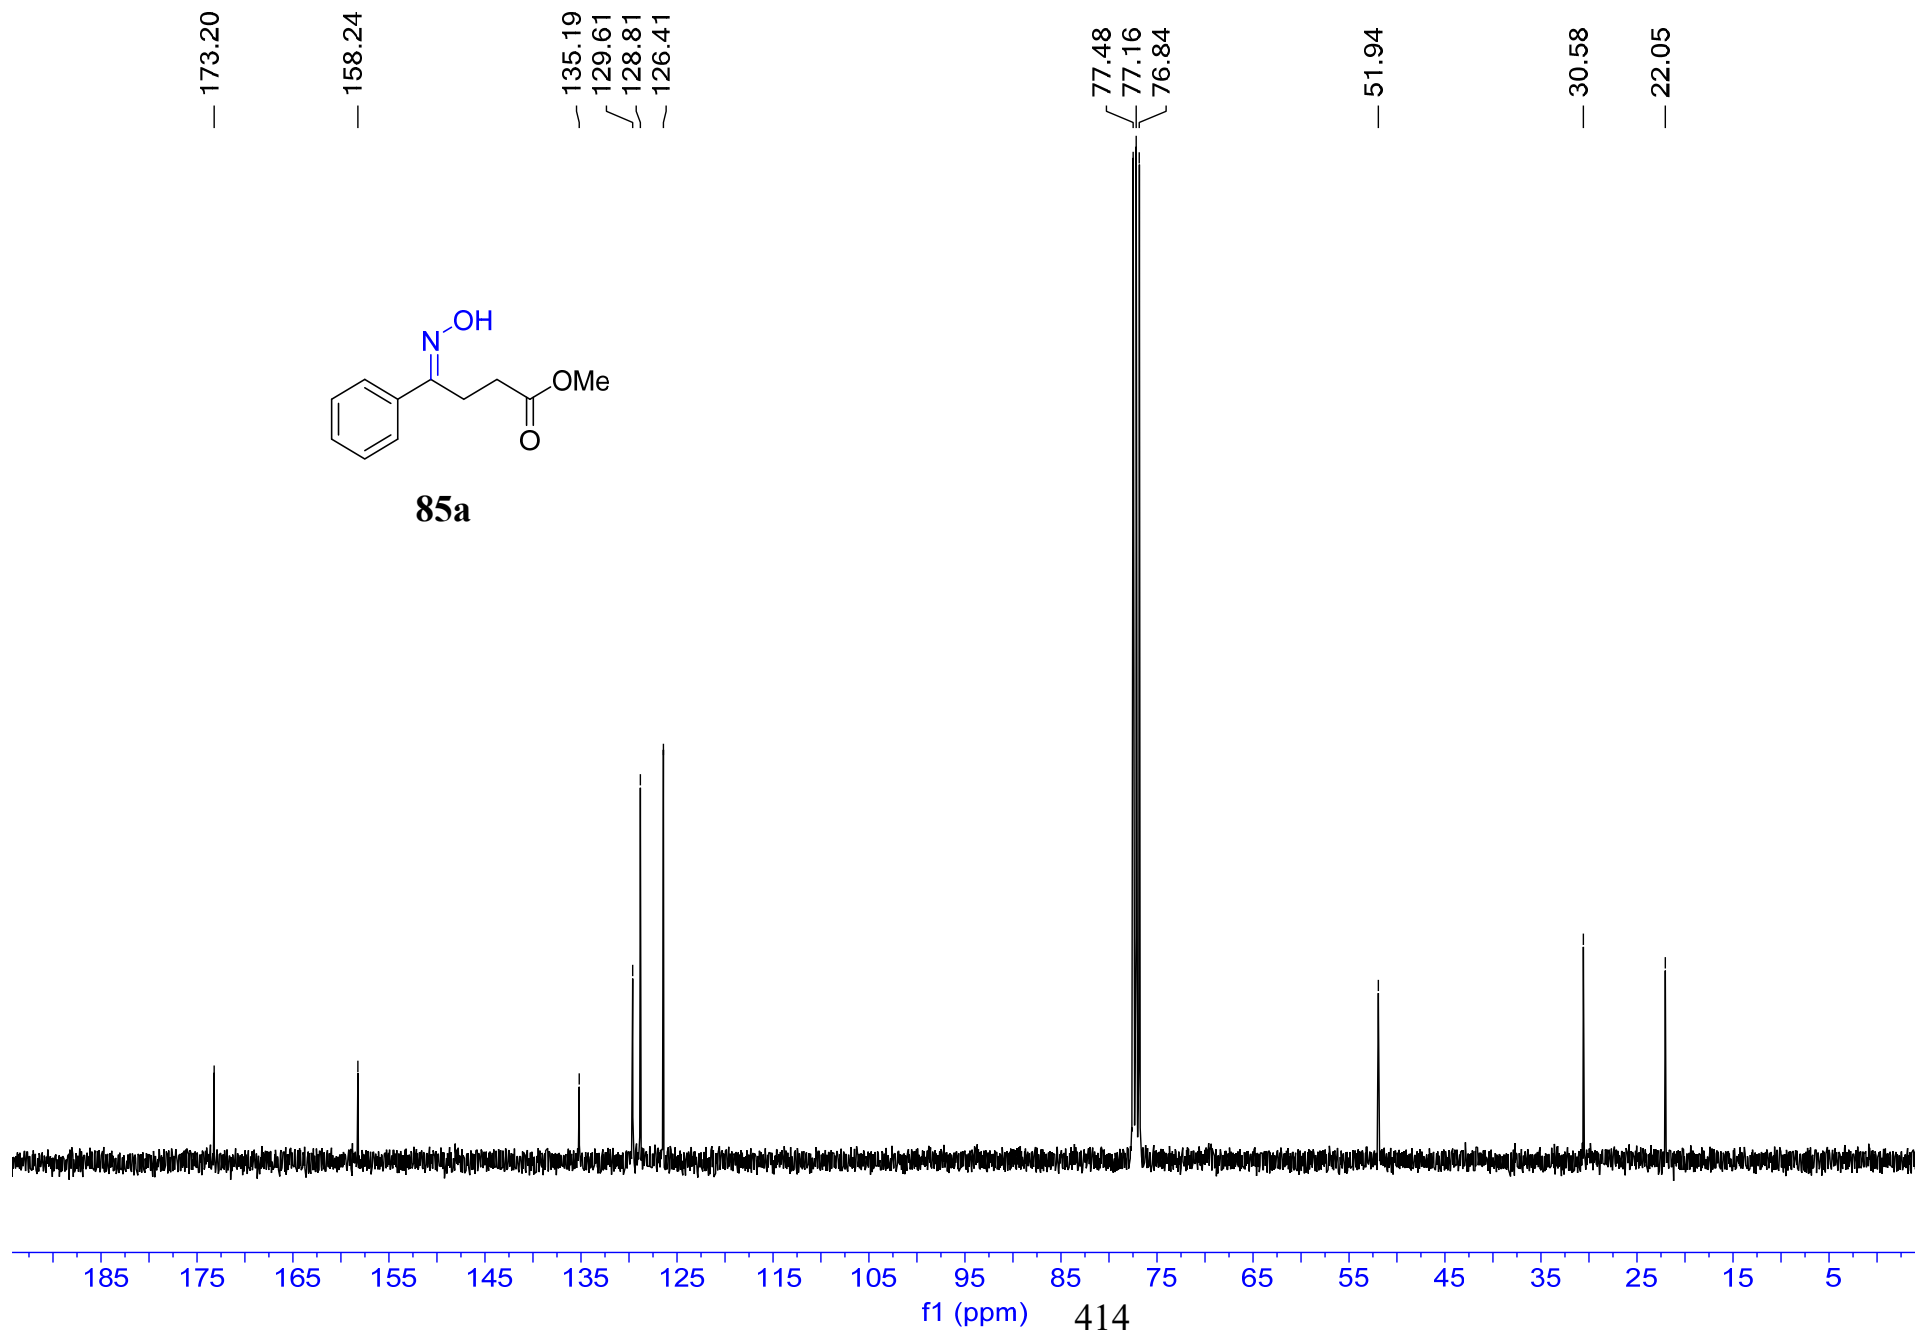

<sup>1</sup>H NMR, 400 MHz, CDCl<sub>3</sub>

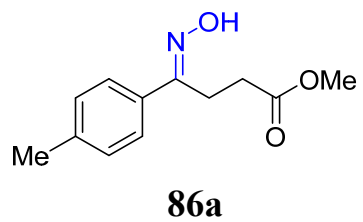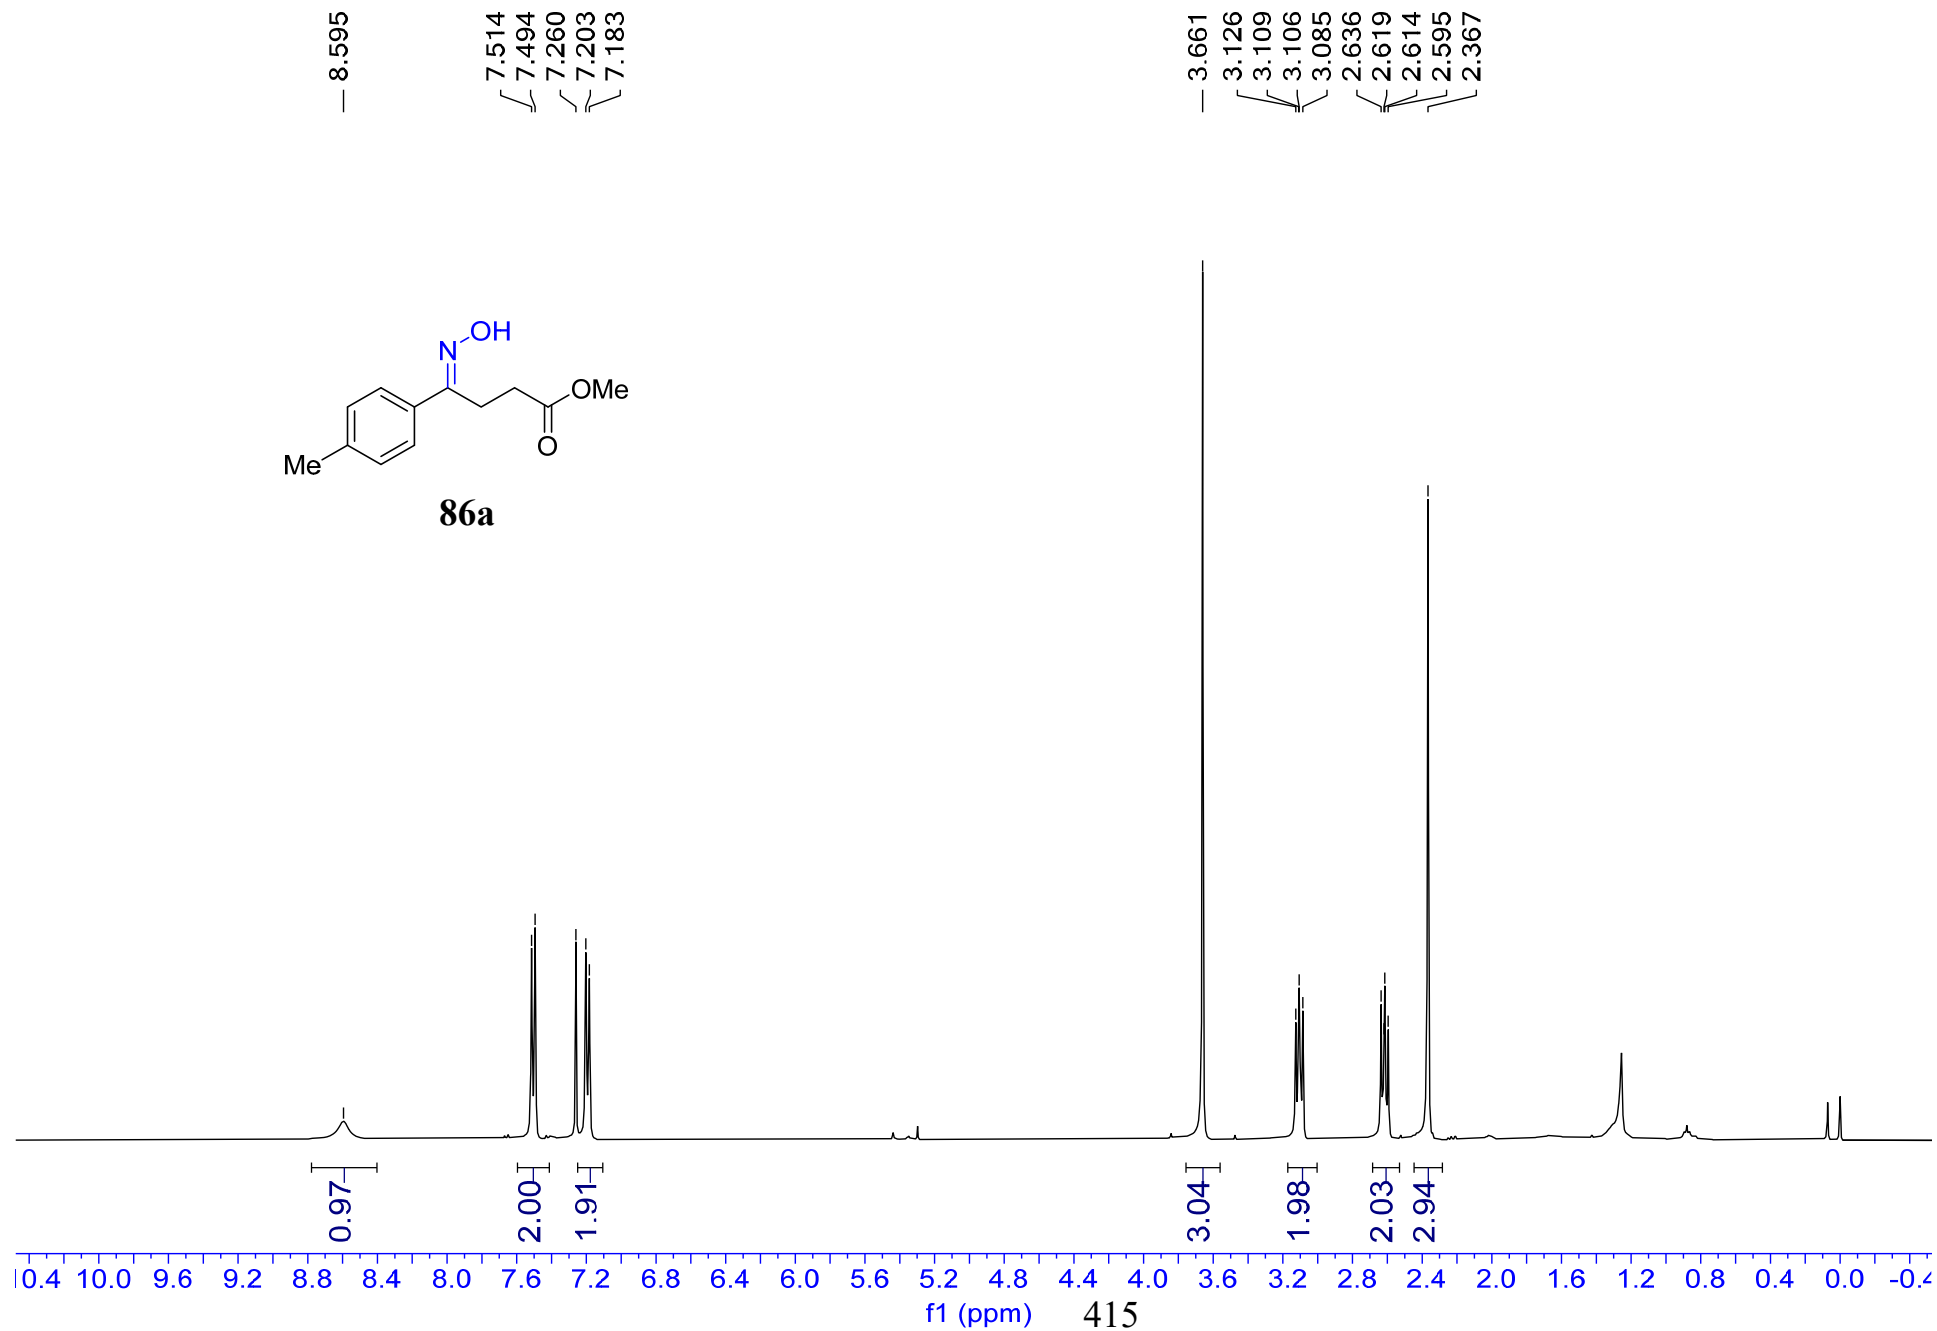

$^{13}\text{C}$  NMR 101 MHz,  $\text{CDCl}_3$

— 173.27

— 158.04

— 139.70

— 132.30

— 129.52

— 126.28

77.48  
77.16  
76.84

— 51.92

— 30.60

22.03  
21.40

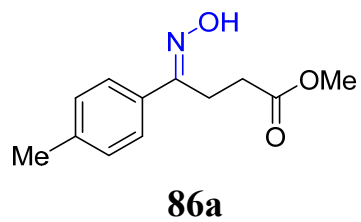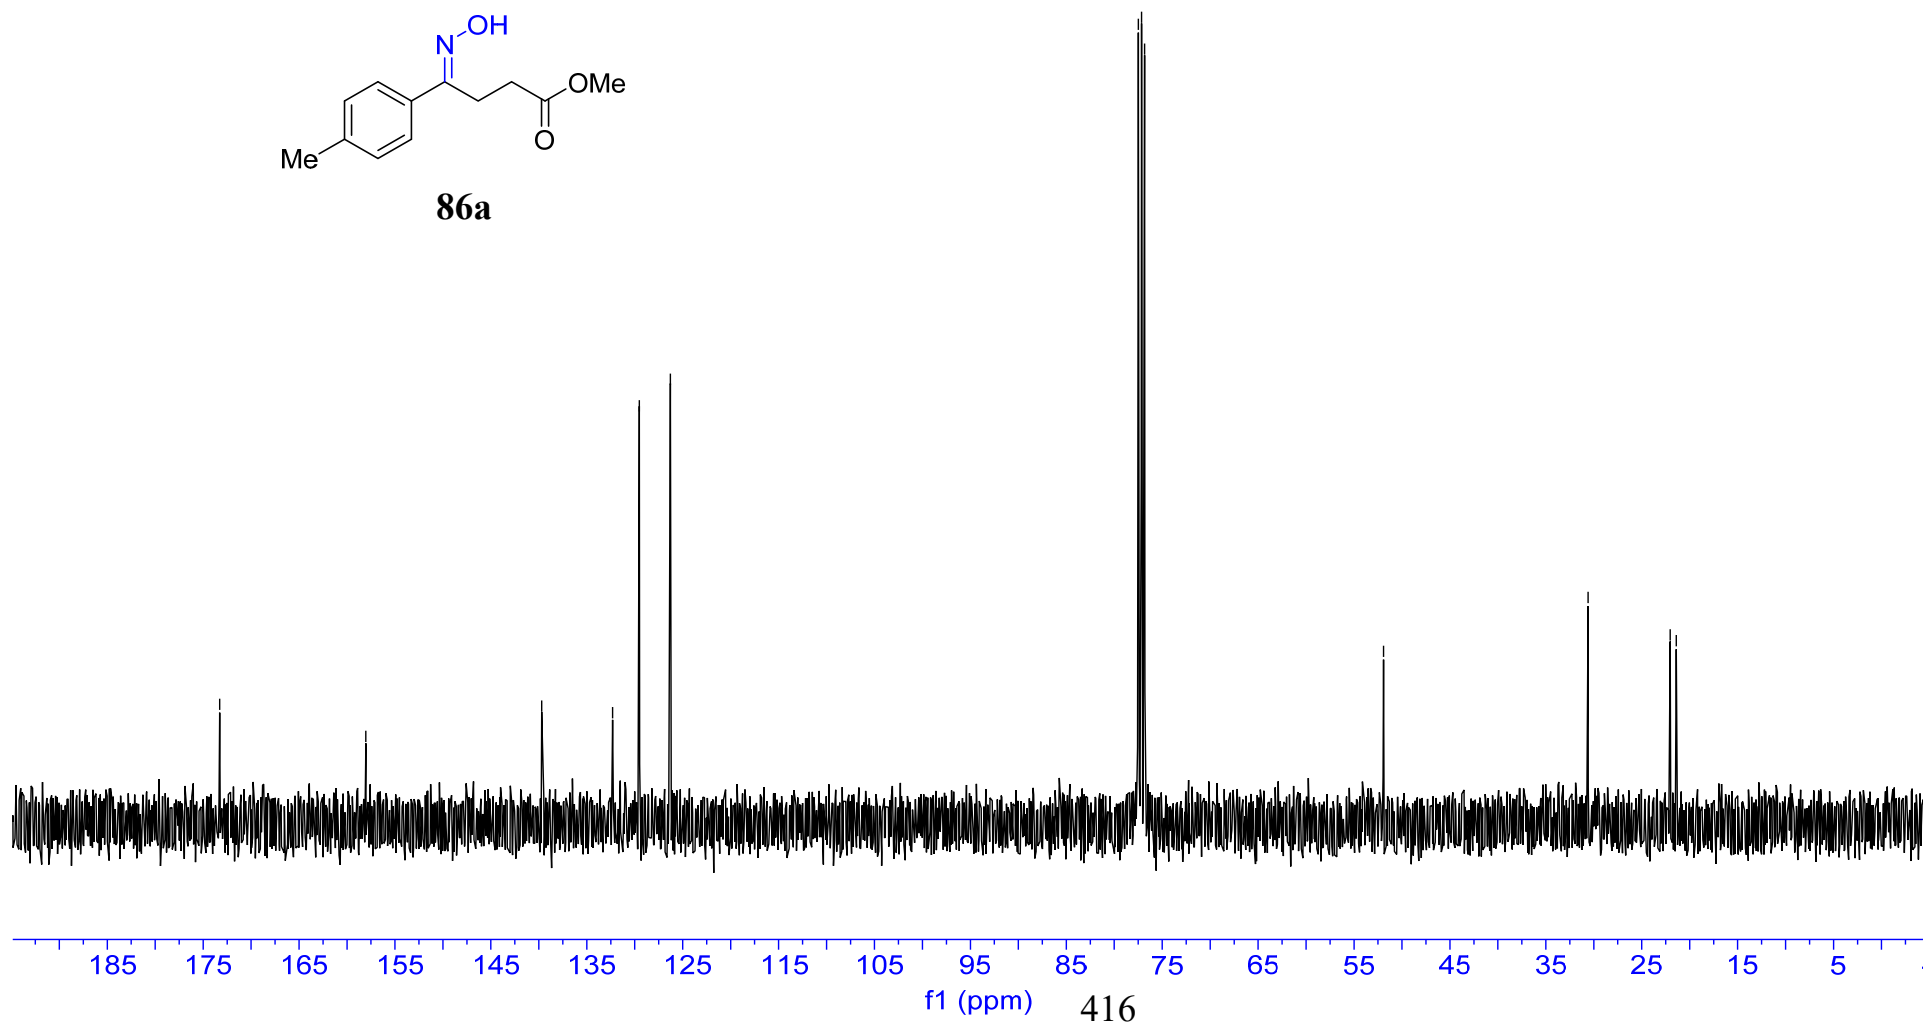

<sup>1</sup>H NMR, 400 MHz, CDCl<sub>3</sub>

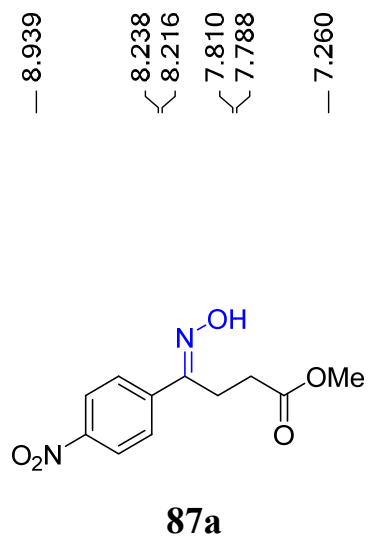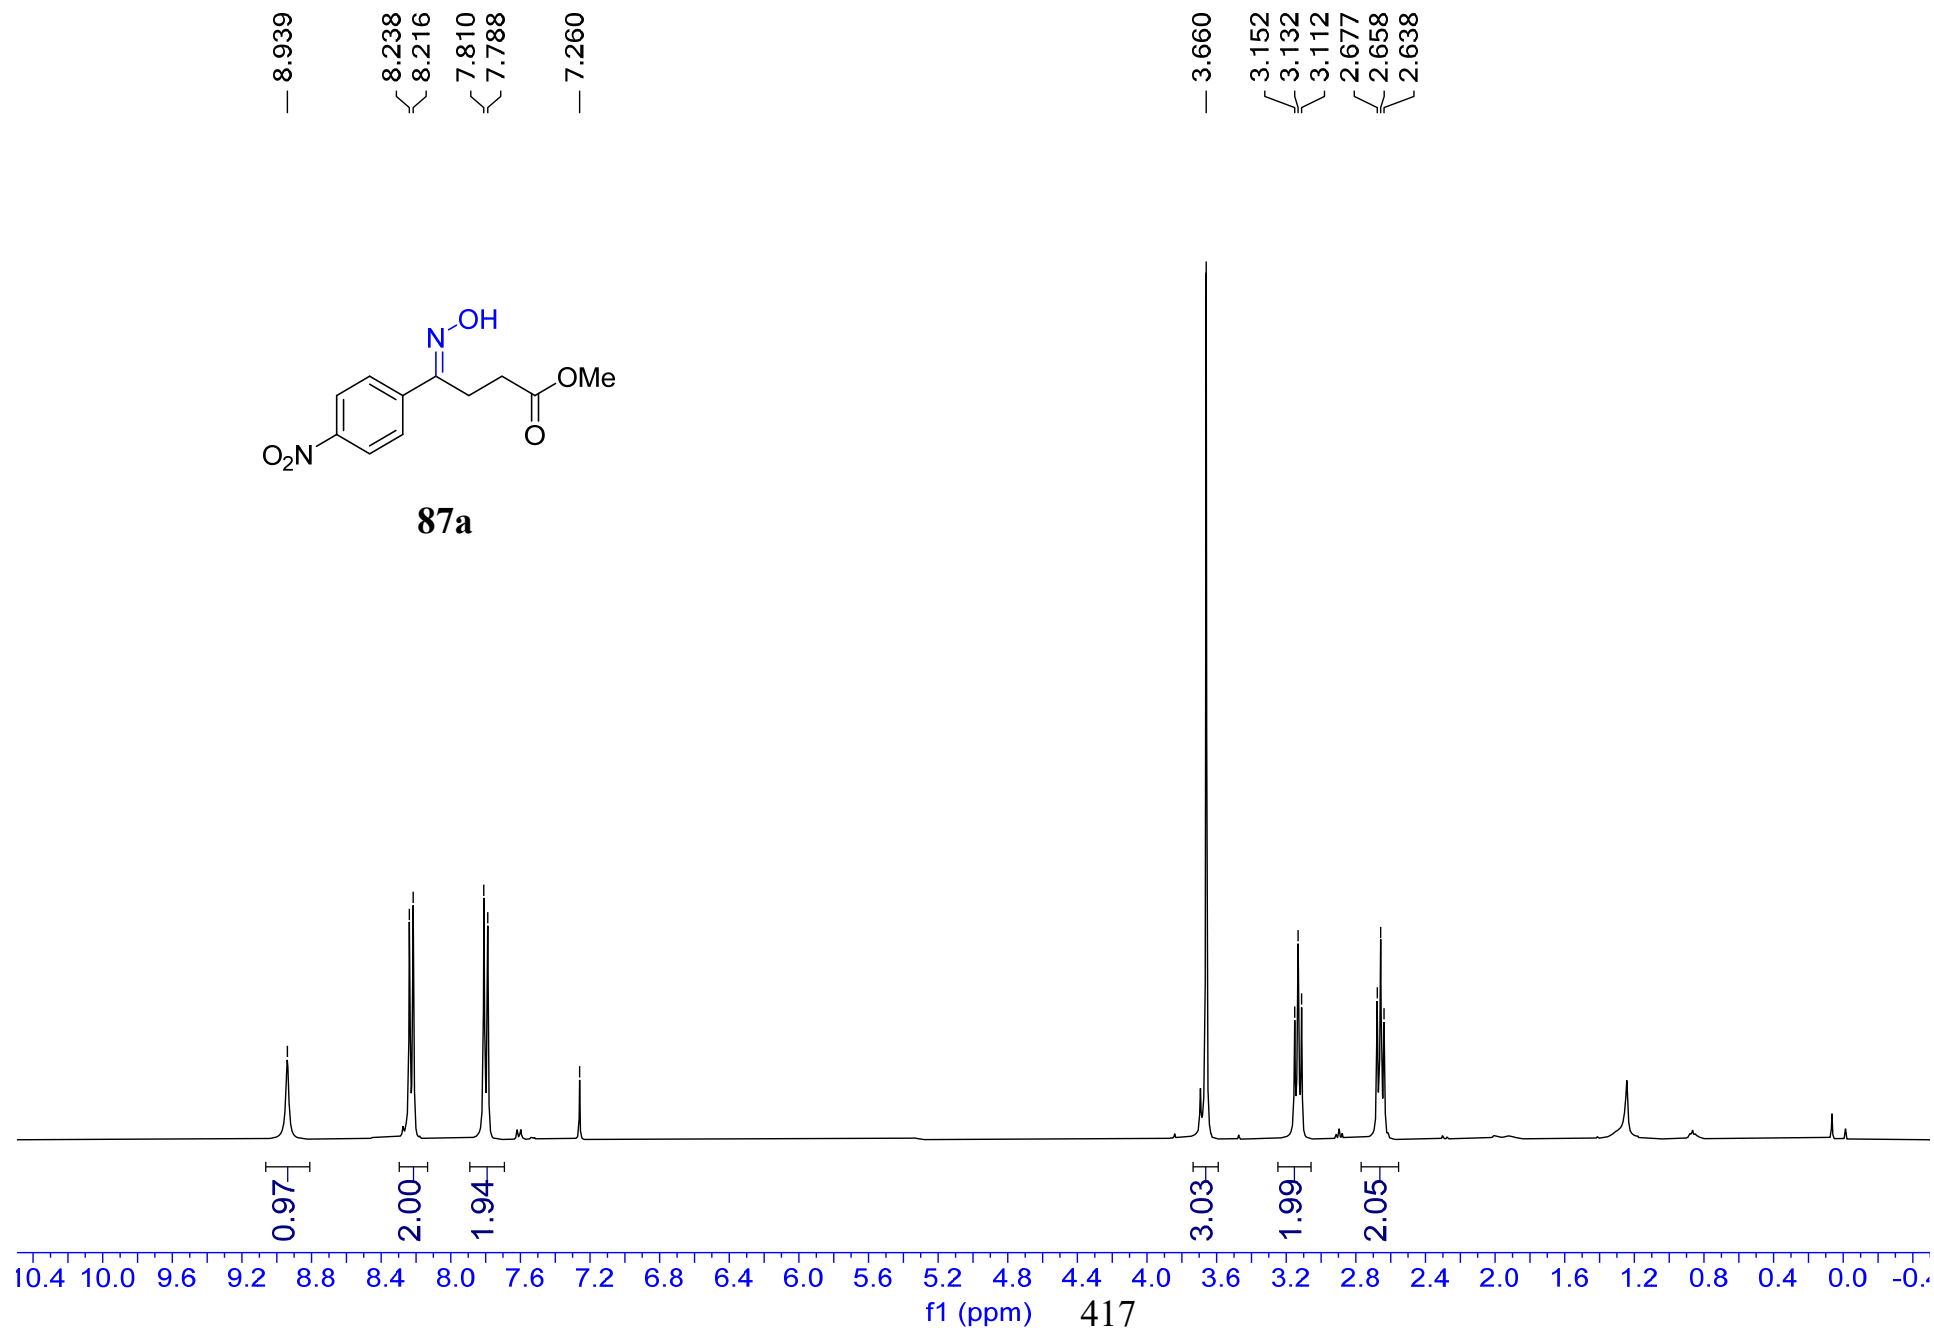

<sup>13</sup>C NMR 101 MHz, CDCl<sub>3</sub>

— 173.01

— 156.73

— 148.35

— 141.40

— 127.26

— 123.97

77.48

77.16

76.84

— 52.12

— 30.30

— 21.89

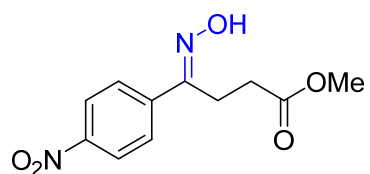

**87a**

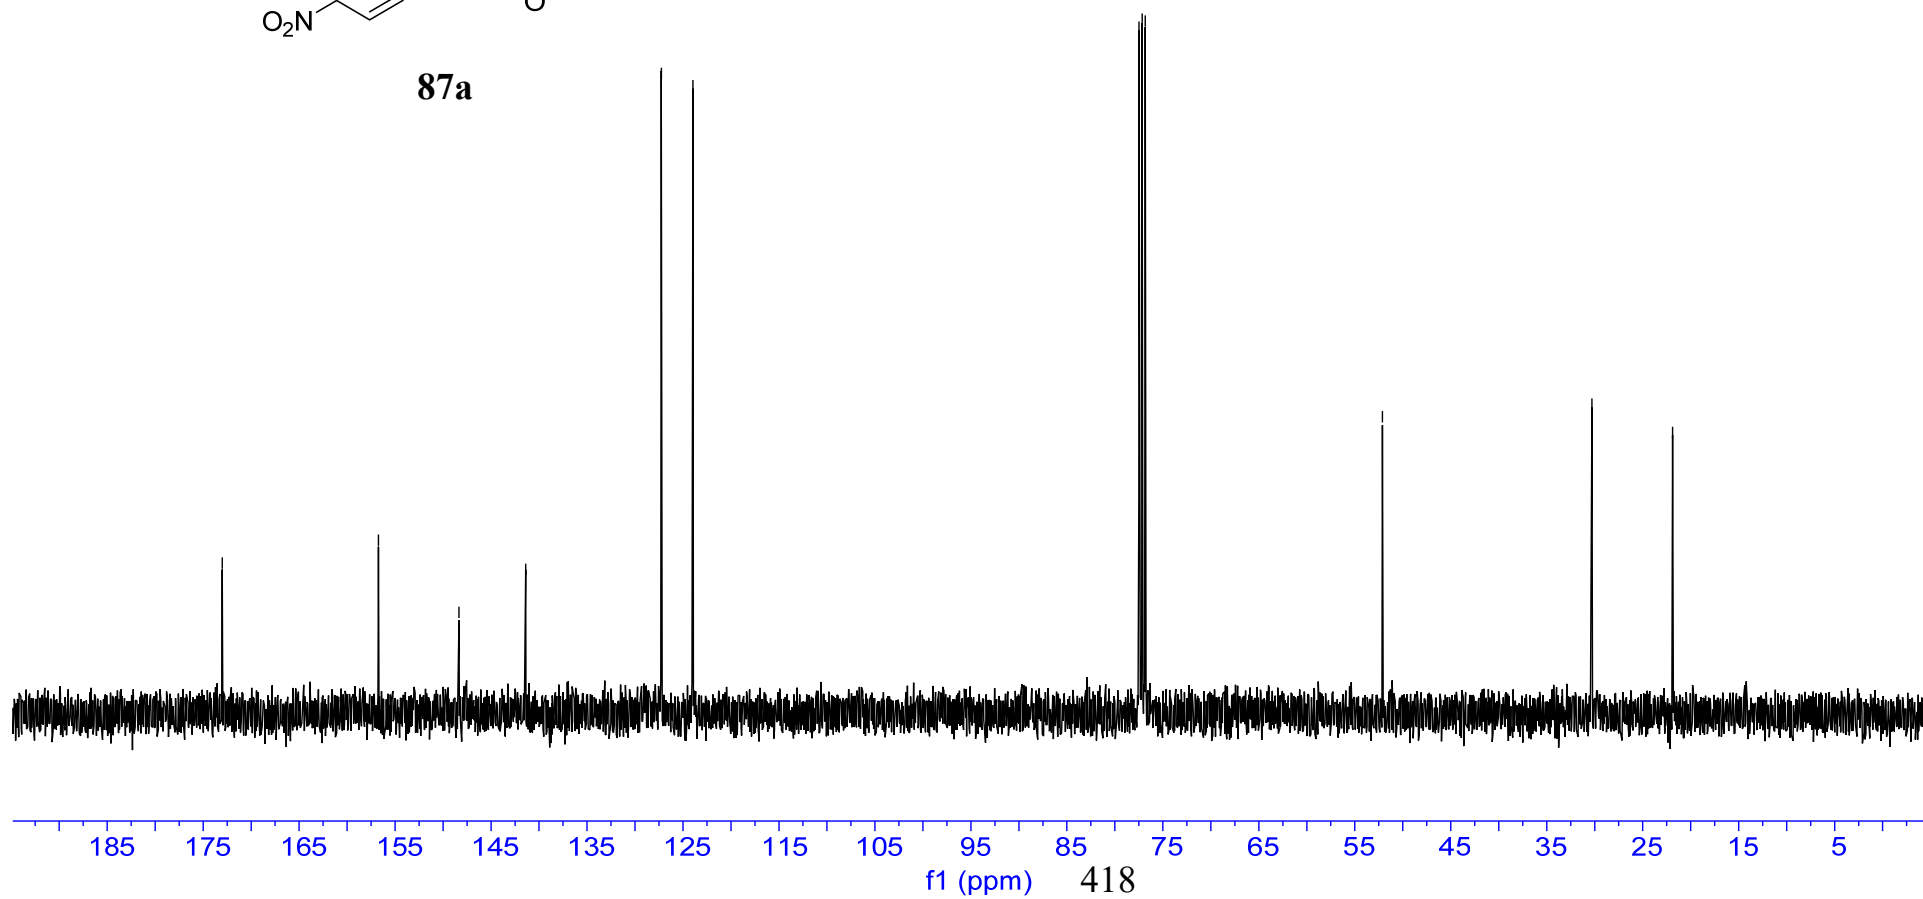

<sup>1</sup>H NMR, 400 MHz, CDCl<sub>3</sub>

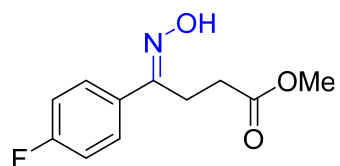

**88a**

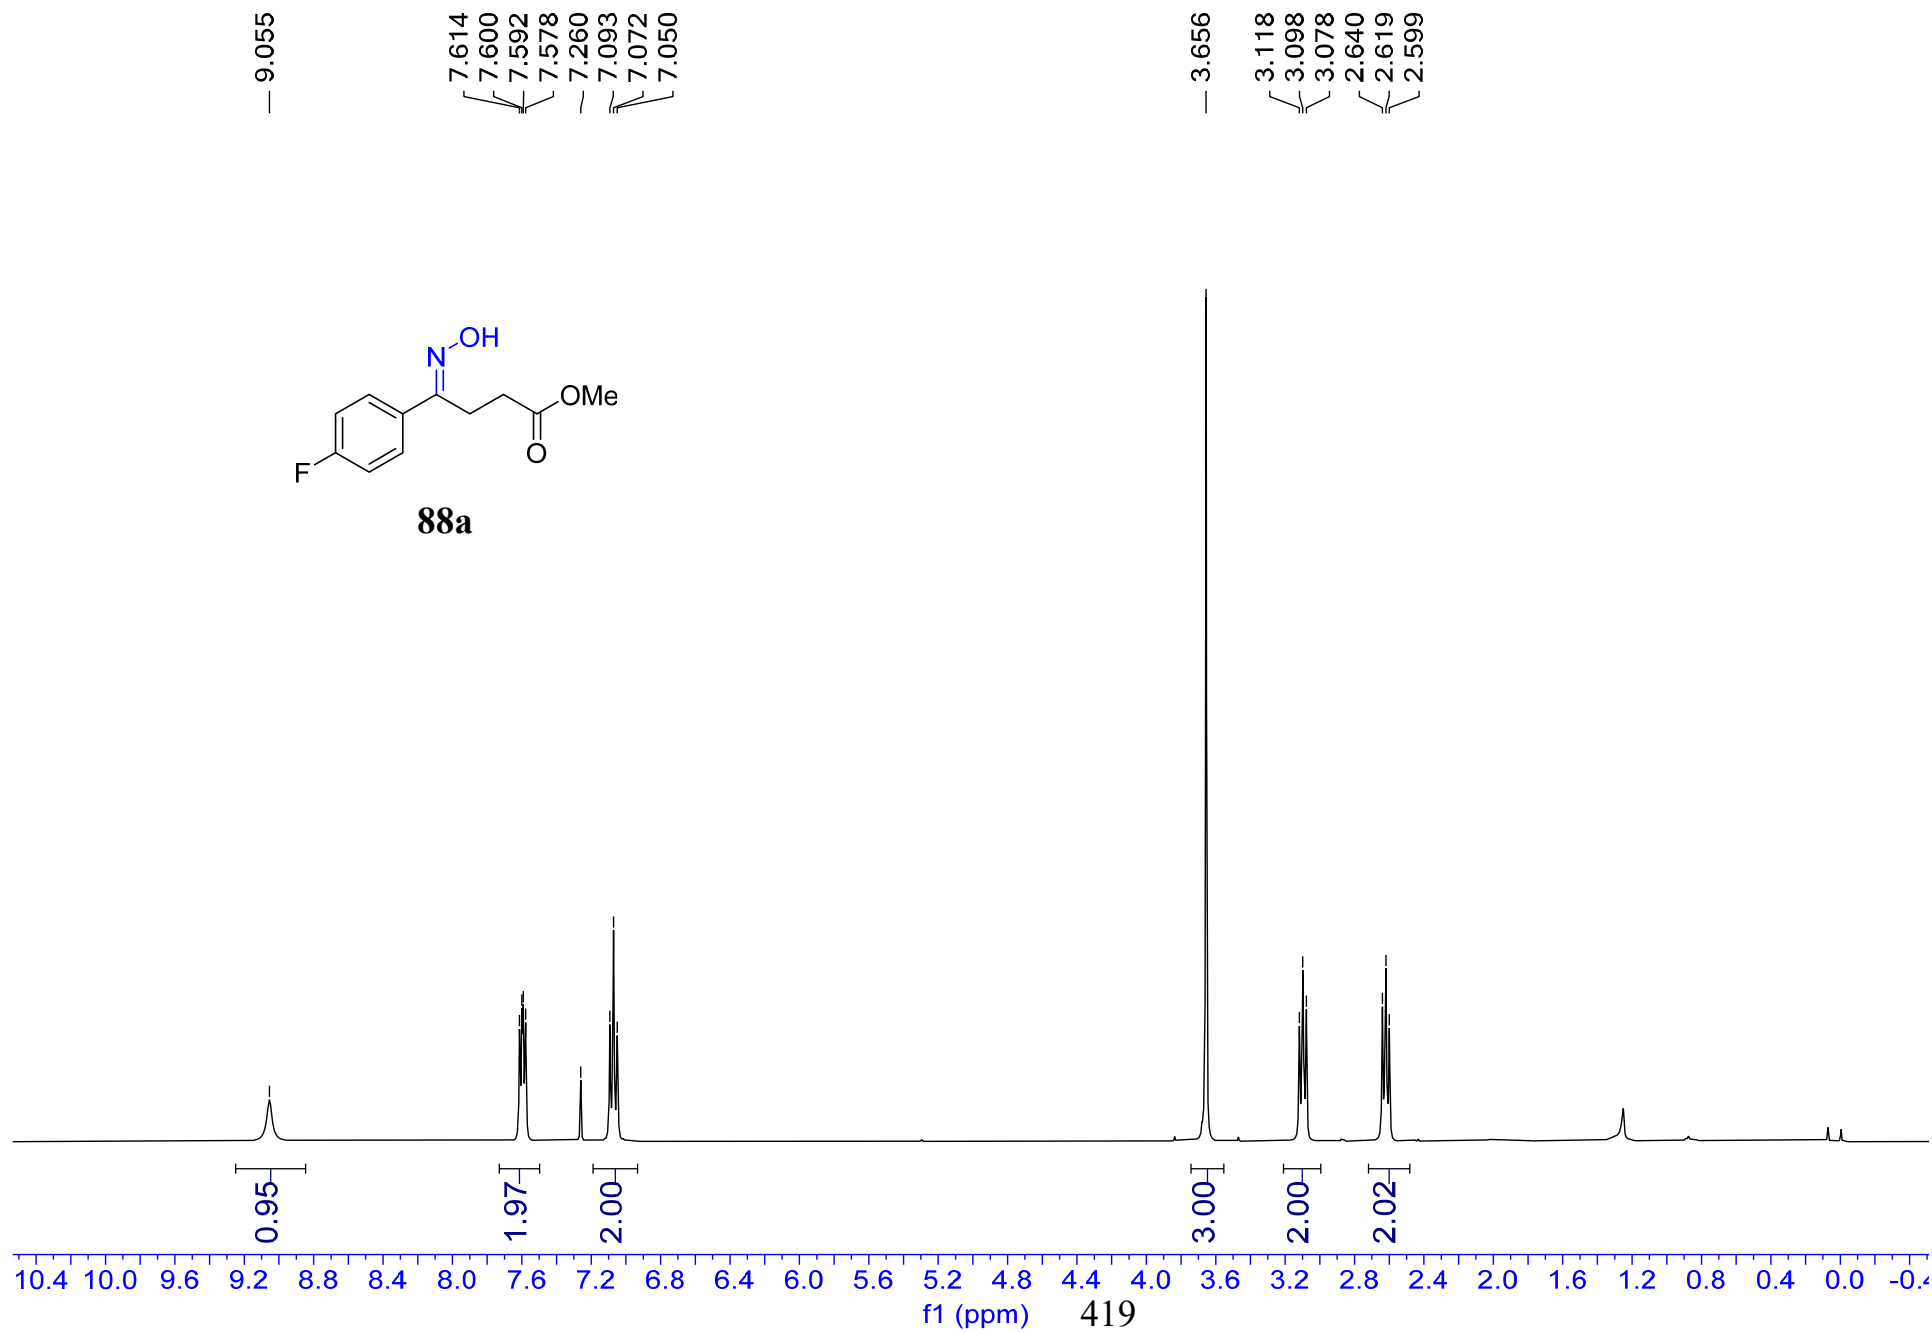

$^{13}\text{C}$  NMR 101 MHz,  $\text{CDCl}_3$

— 173.17

~ 164.91

~ 162.43

~ 157.35

∠ 131.34

∠ 131.31

∠ 128.38

∠ 128.29

∠ 115.93

∠ 115.72

∠ 77.48

∠ 77.16

∠ 76.85

— 51.98

— 30.48

— 22.16

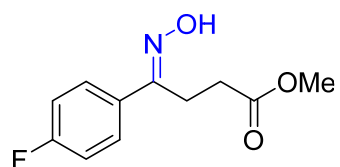

**88a**

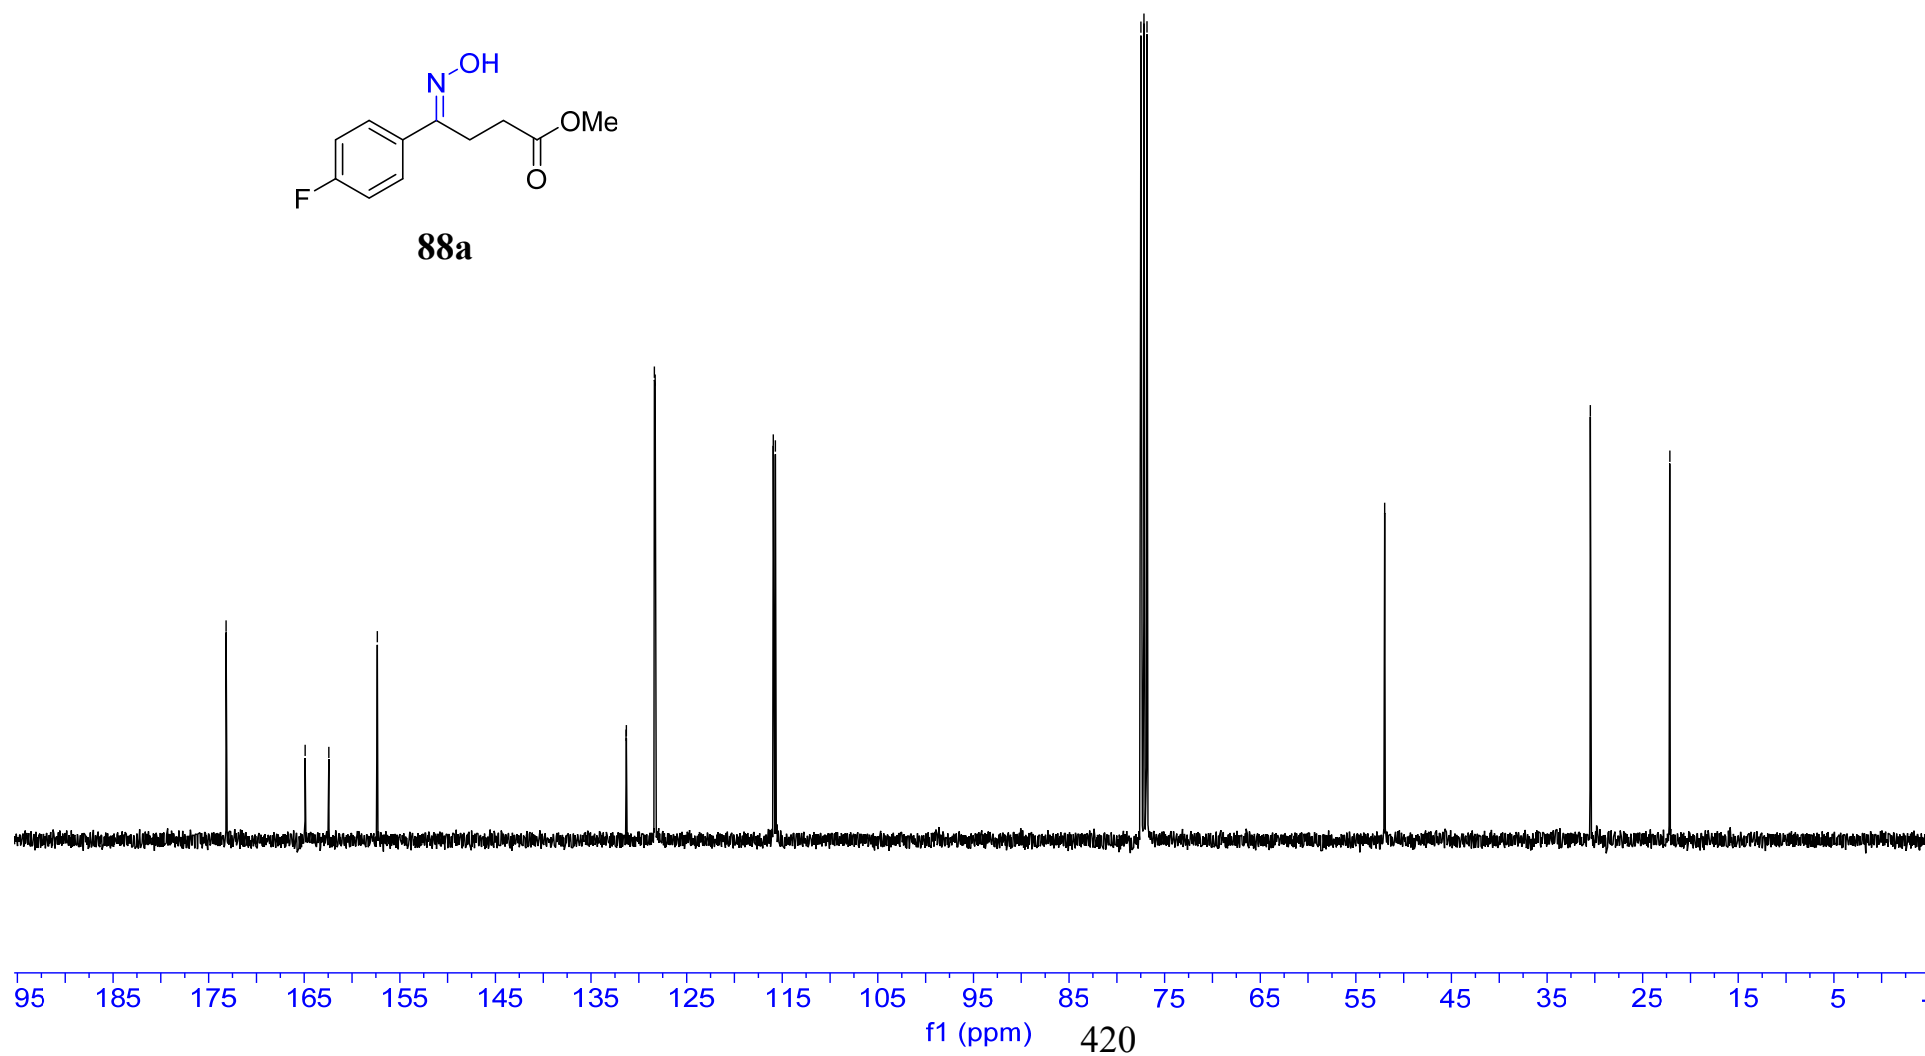



$^{19}\text{F}$  NMR 376 MHz,  $\text{CDCl}_3$



**88a**

— -111.595

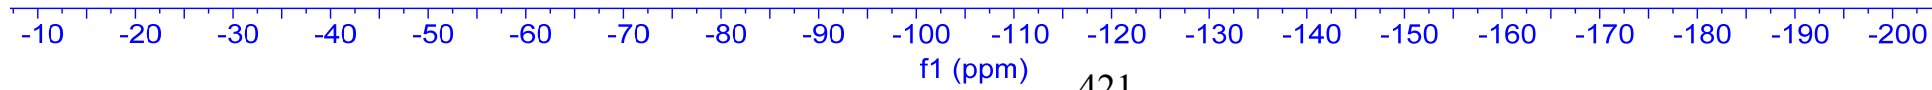

<sup>1</sup>H NMR, 400 MHz, CDCl<sub>3</sub>

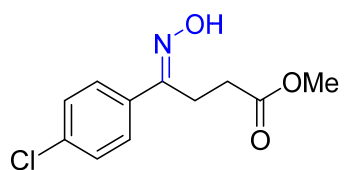

**89a**

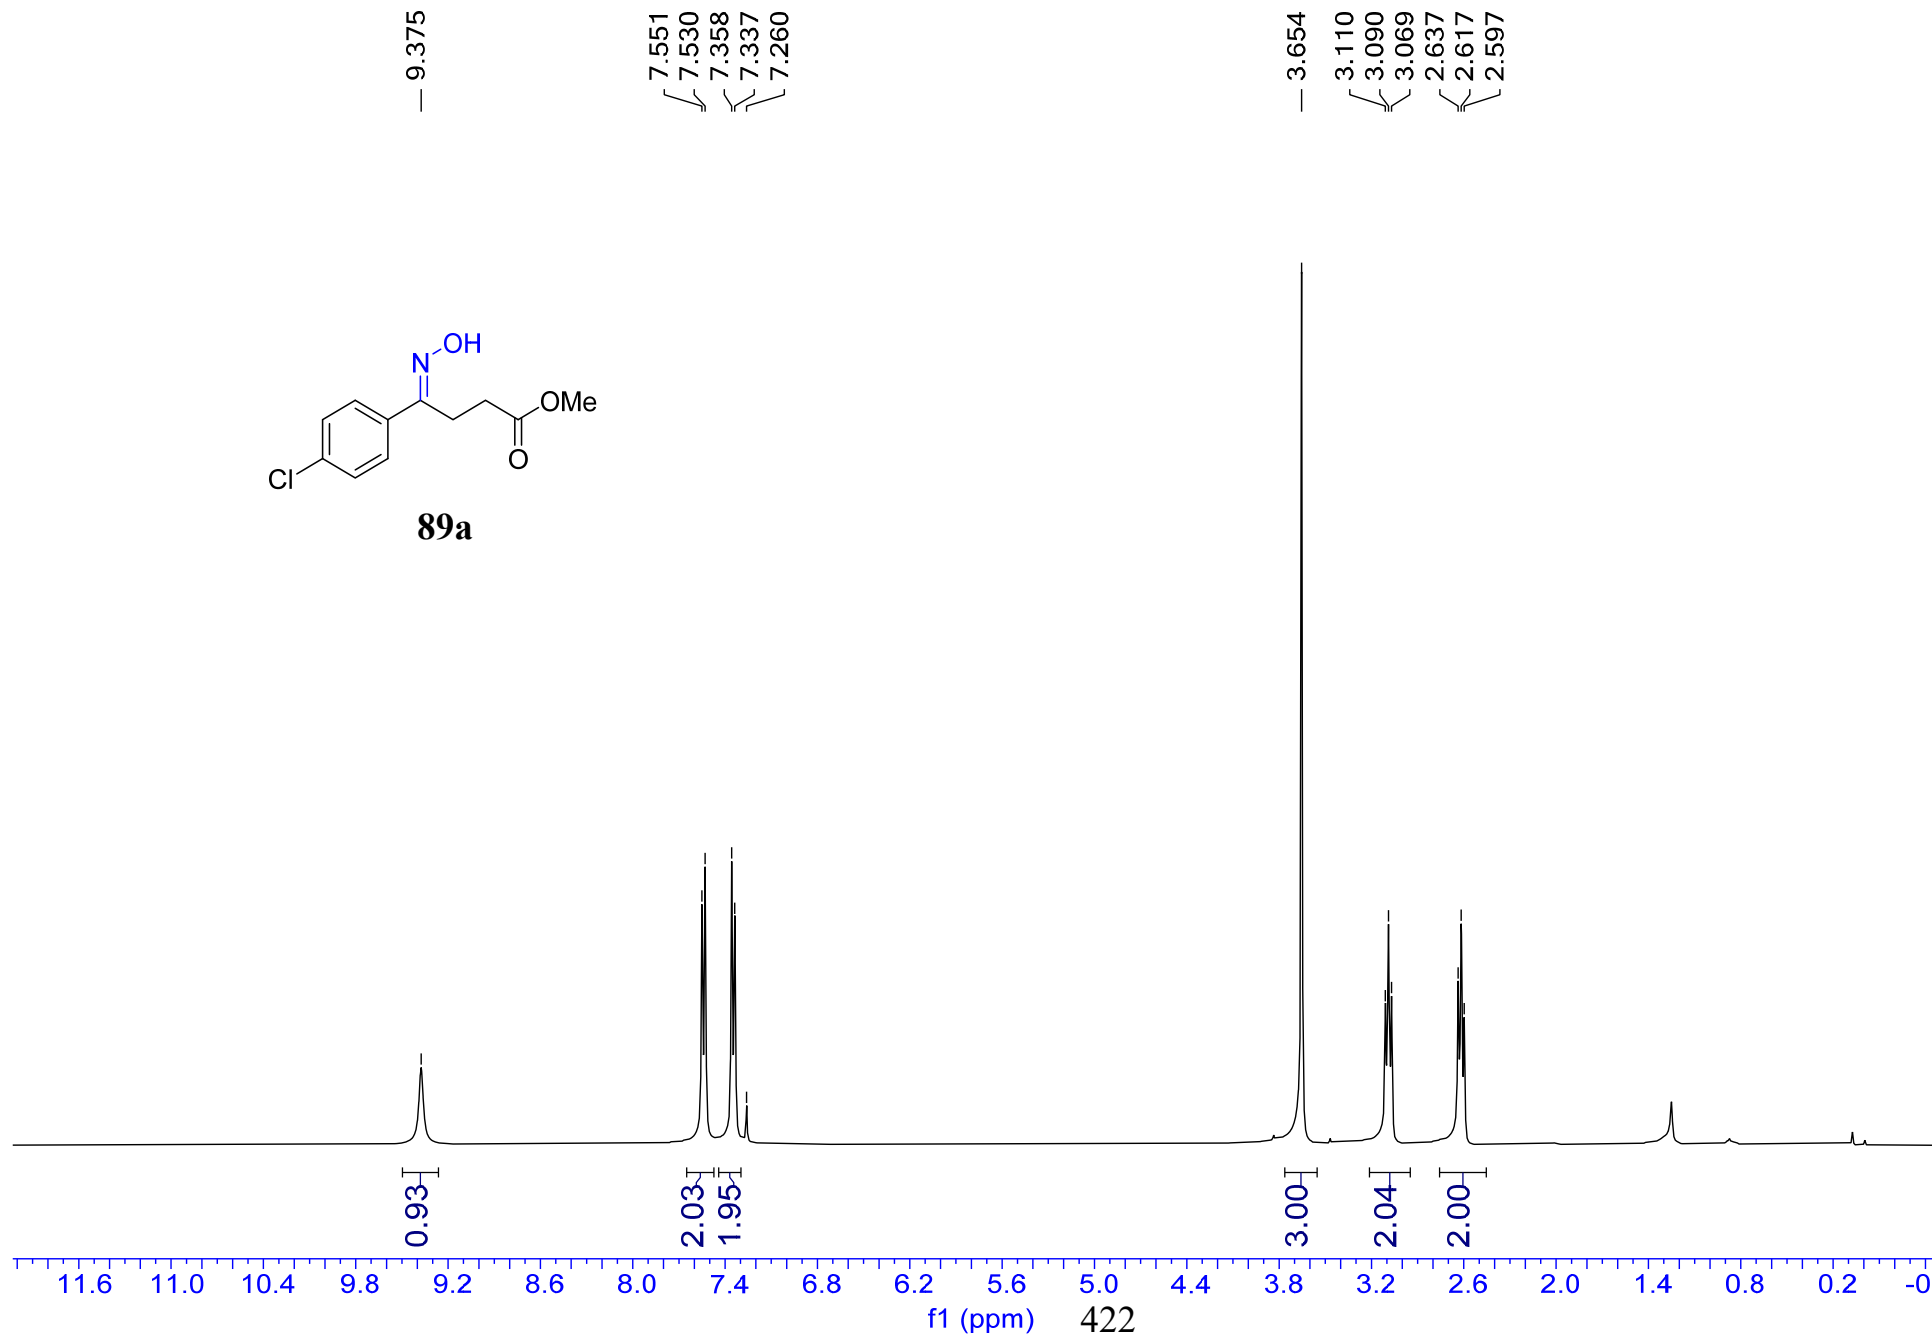

<sup>13</sup>C NMR 101 MHz, CDCl<sub>3</sub>

— 173.16

— 157.27

— 135.66

— 133.61

— 129.01

— 127.69

— 77.48

— 77.16

— 76.84

— 52.00

— 30.42

— 22.02

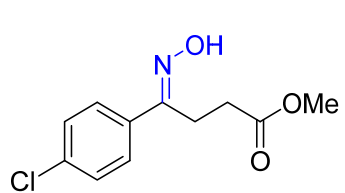

**89a**

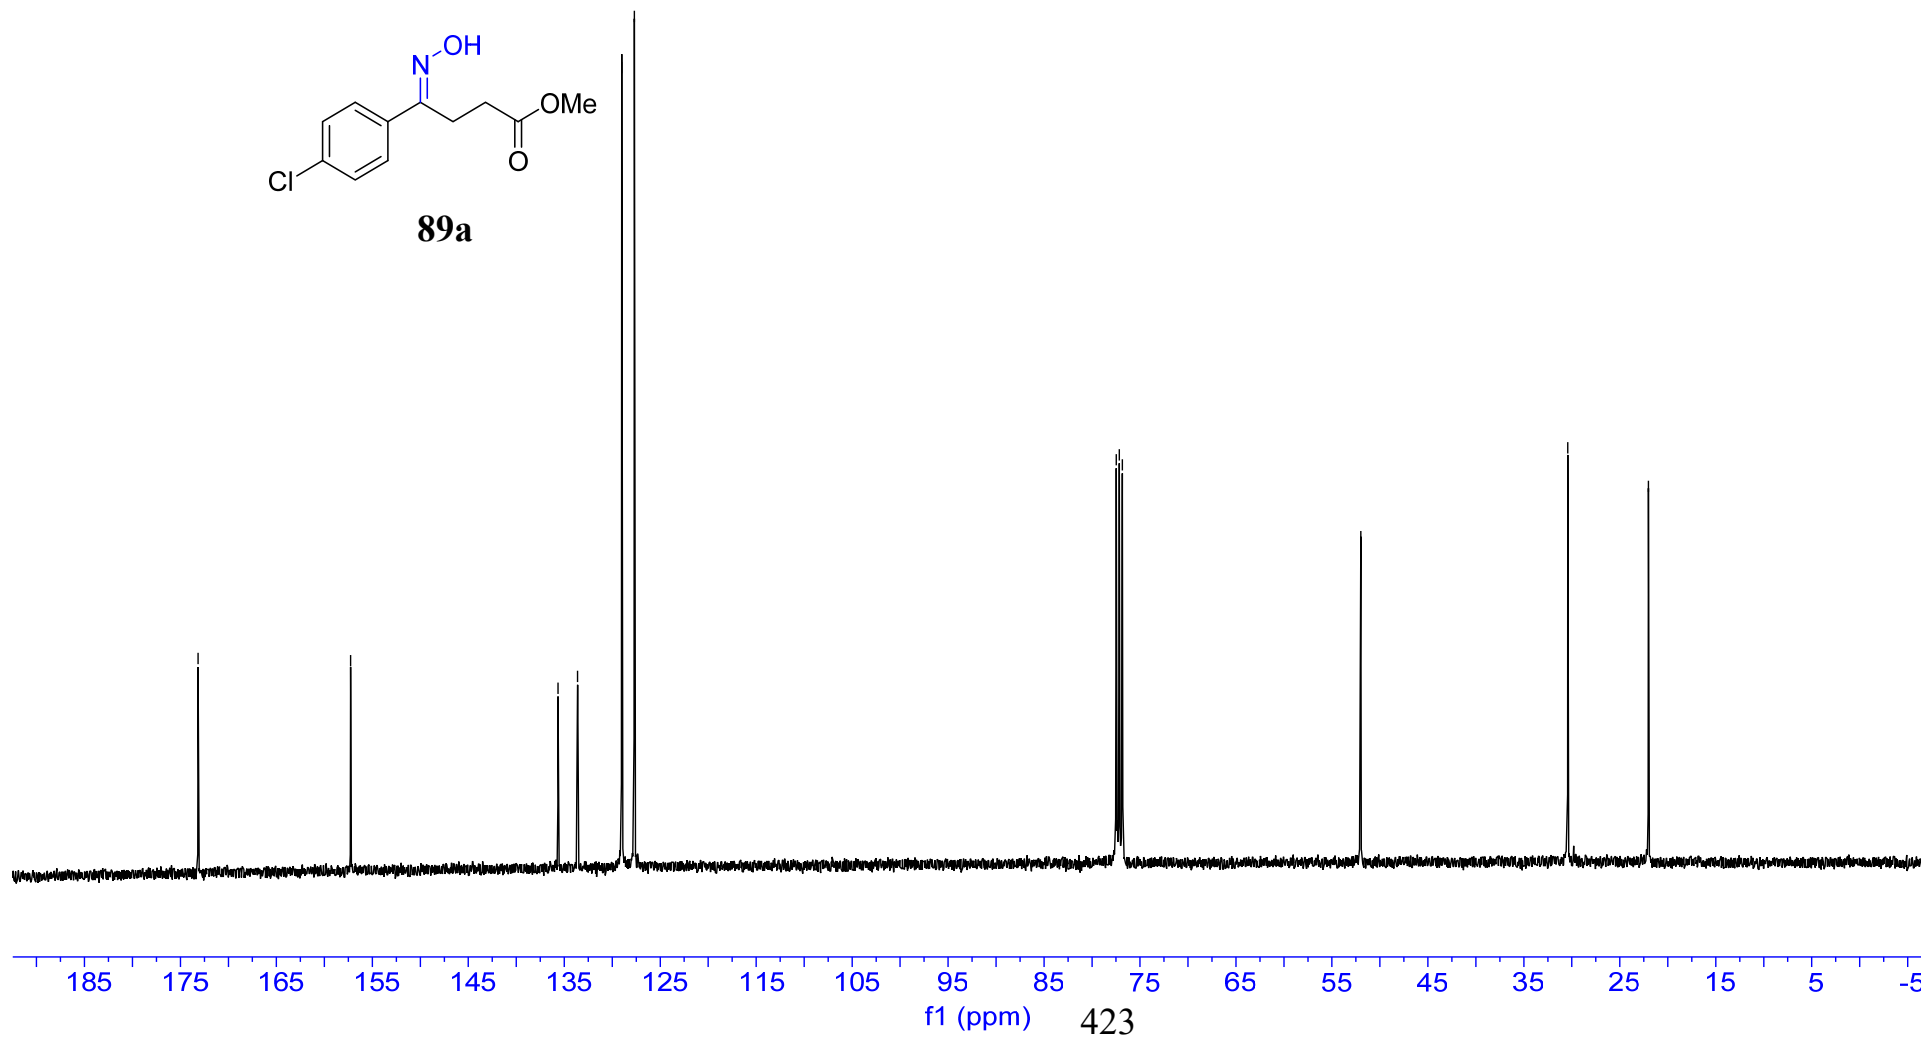

<sup>1</sup>H NMR, 400 MHz, CDCl<sub>3</sub>

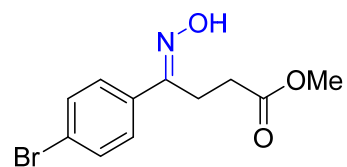

**90a**

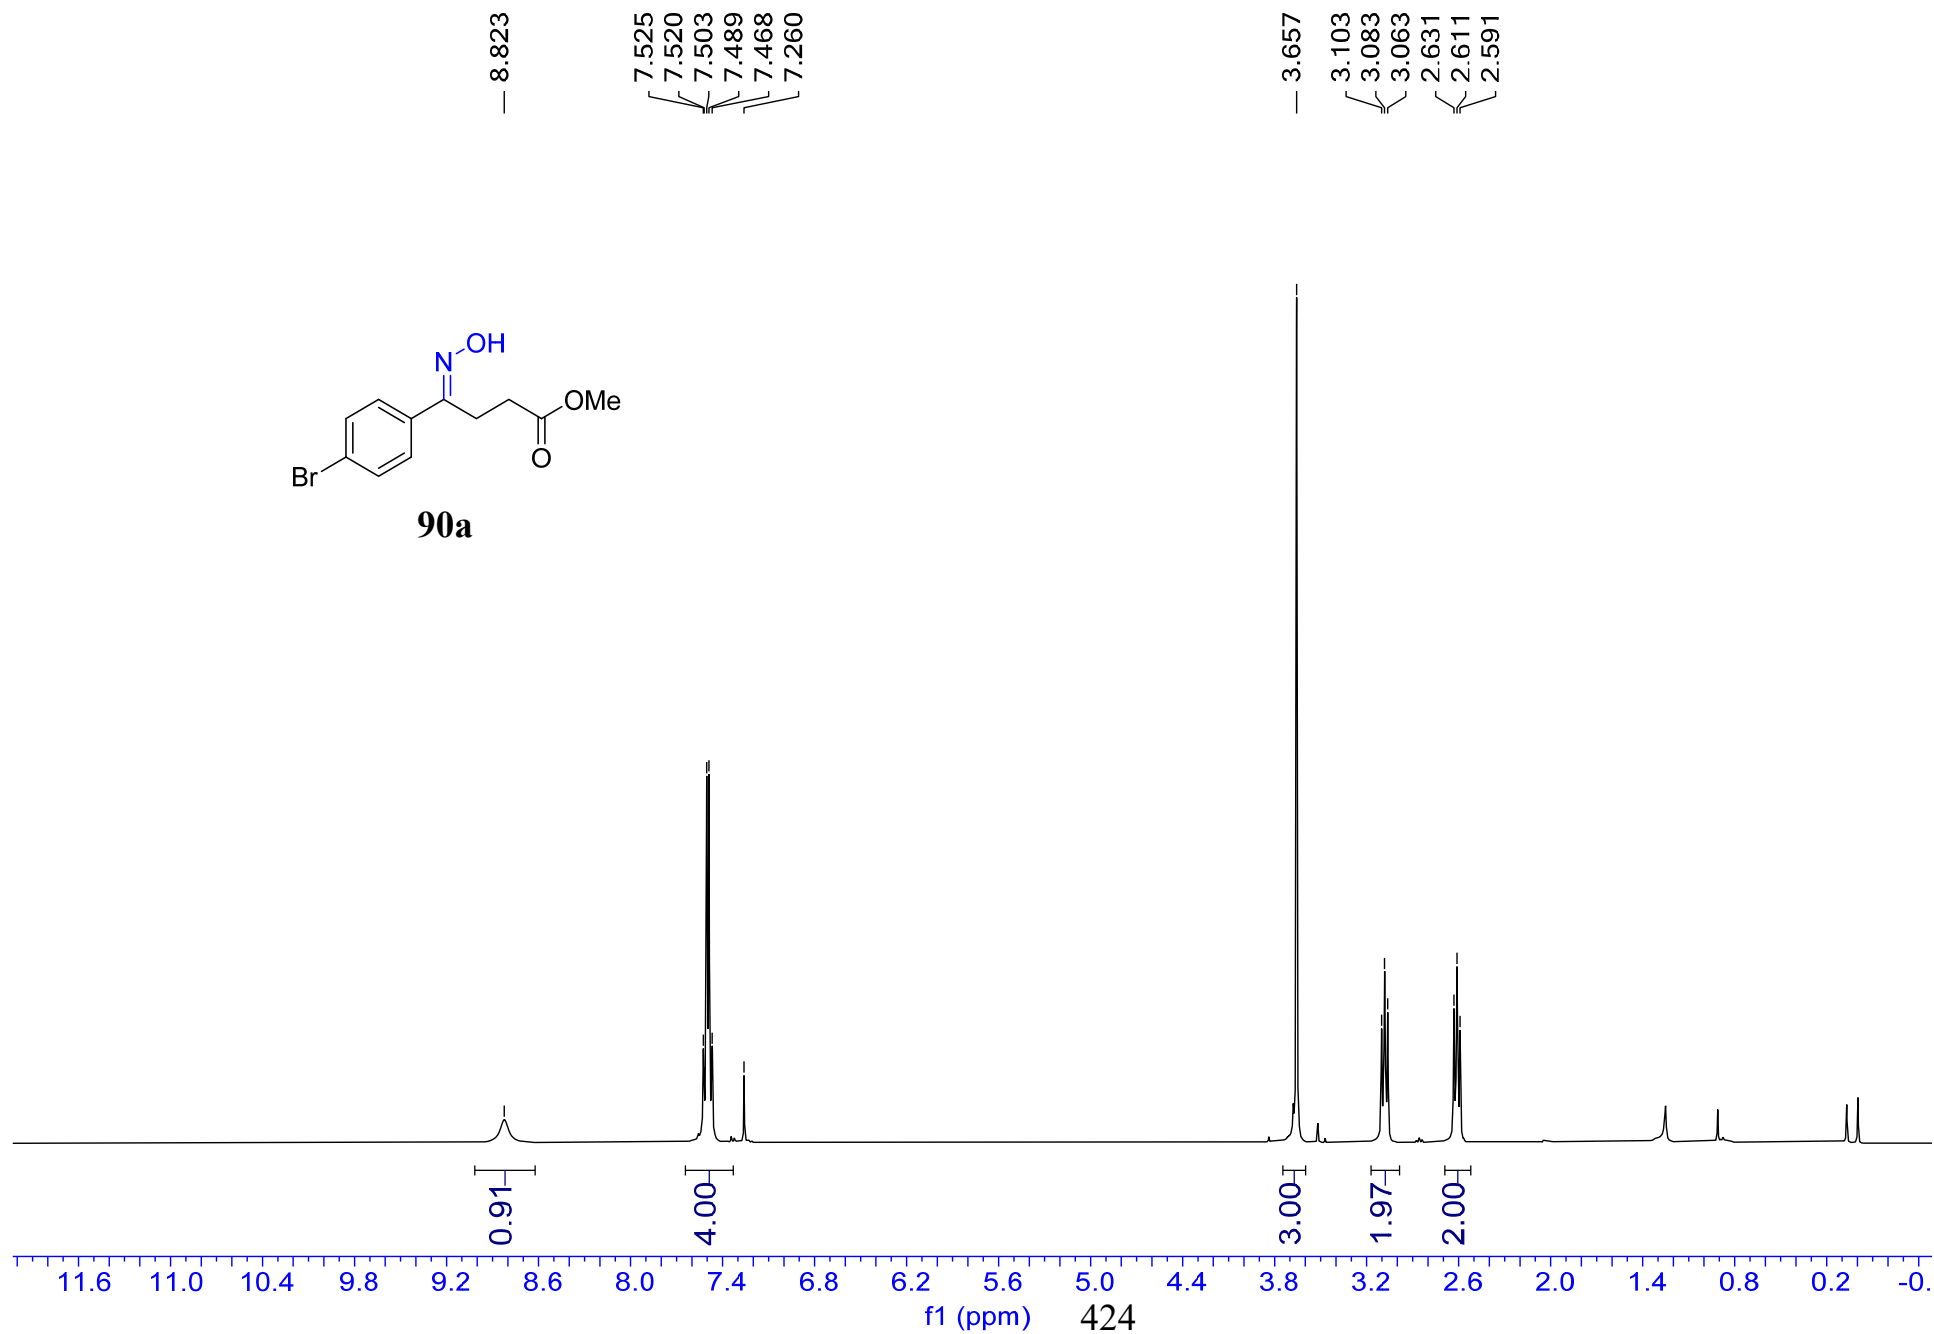

$^{13}\text{C}$  NMR 101 MHz,  $\text{CDCl}_3$

— 173.10

— 157.42

— 134.11

— 131.98

— 127.98

— 123.97

{ 77.48  
77.16  
76.84 }

— 52.00

— 30.47

— 21.90

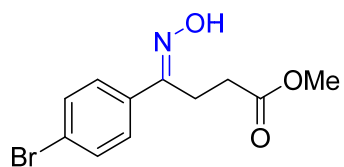

**90a**

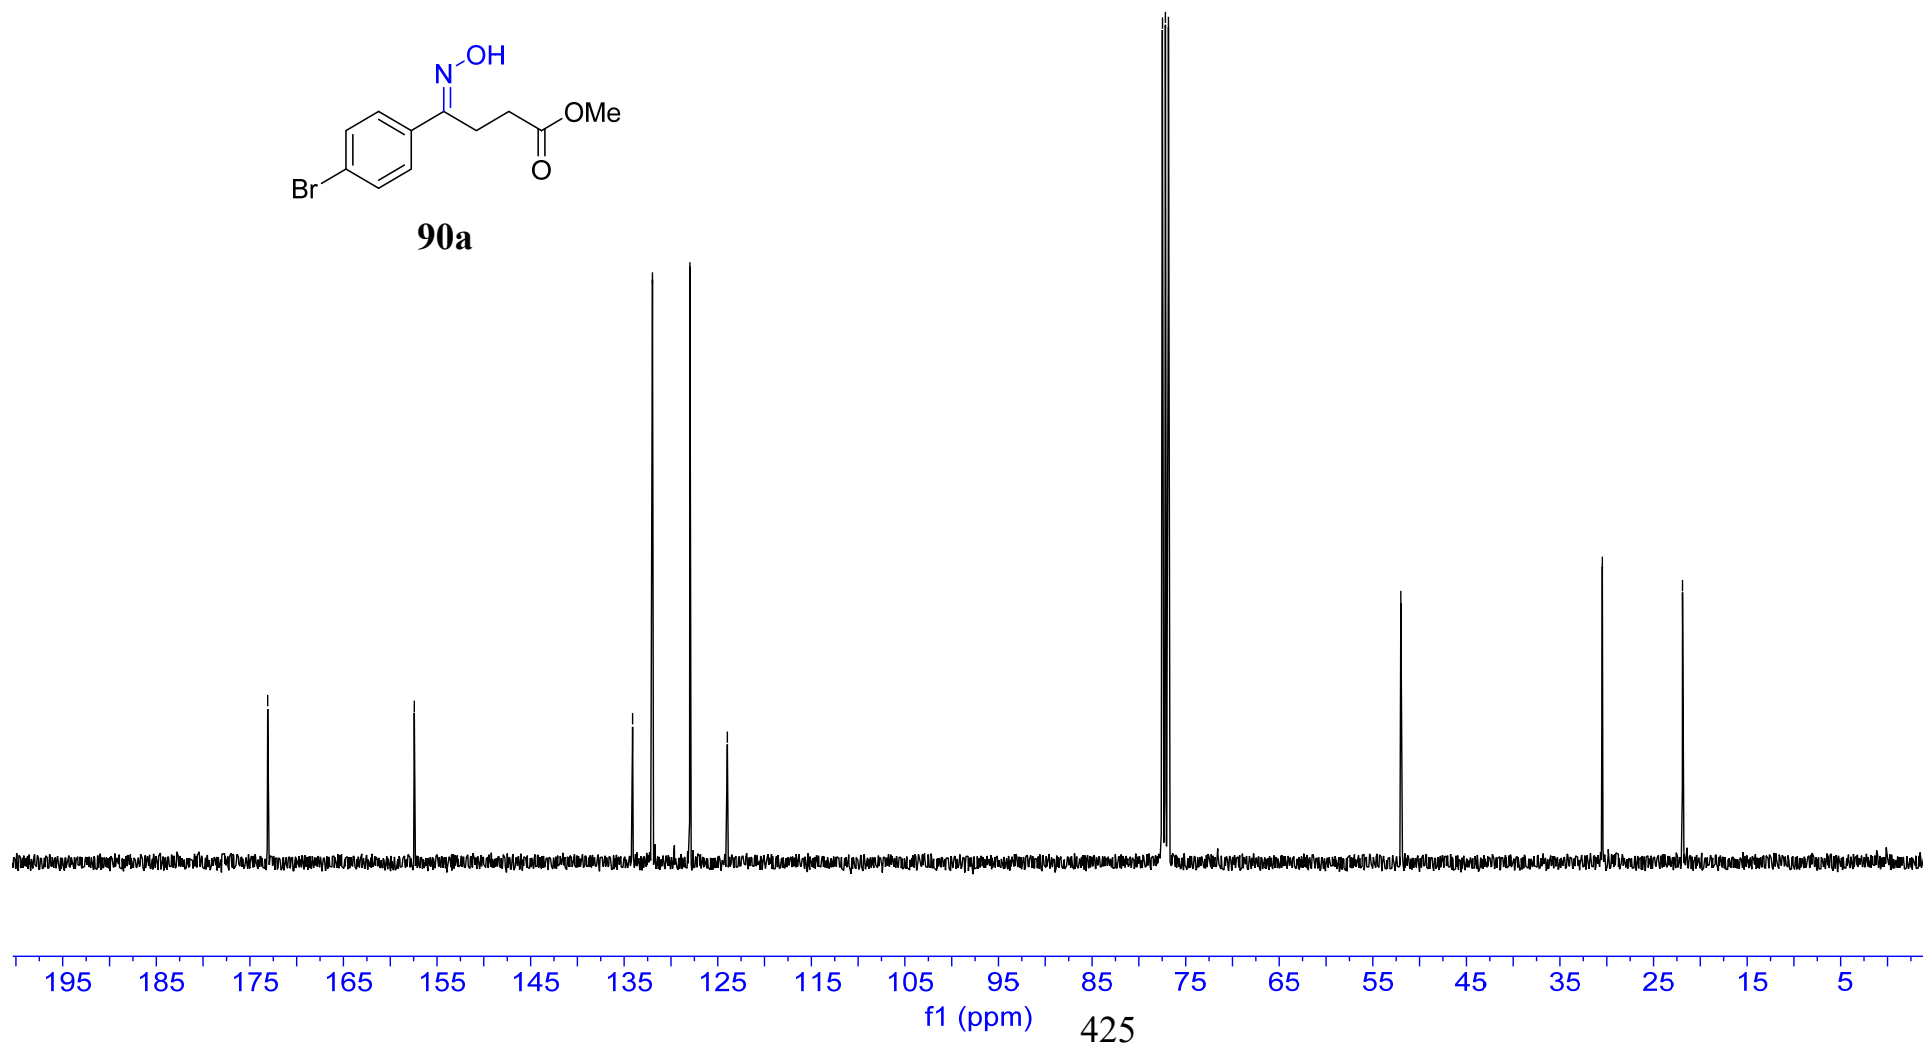

$^1\text{H}$  NMR, 400 MHz,  $\text{CDCl}_3$

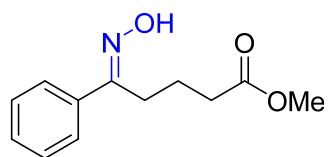

**91a**

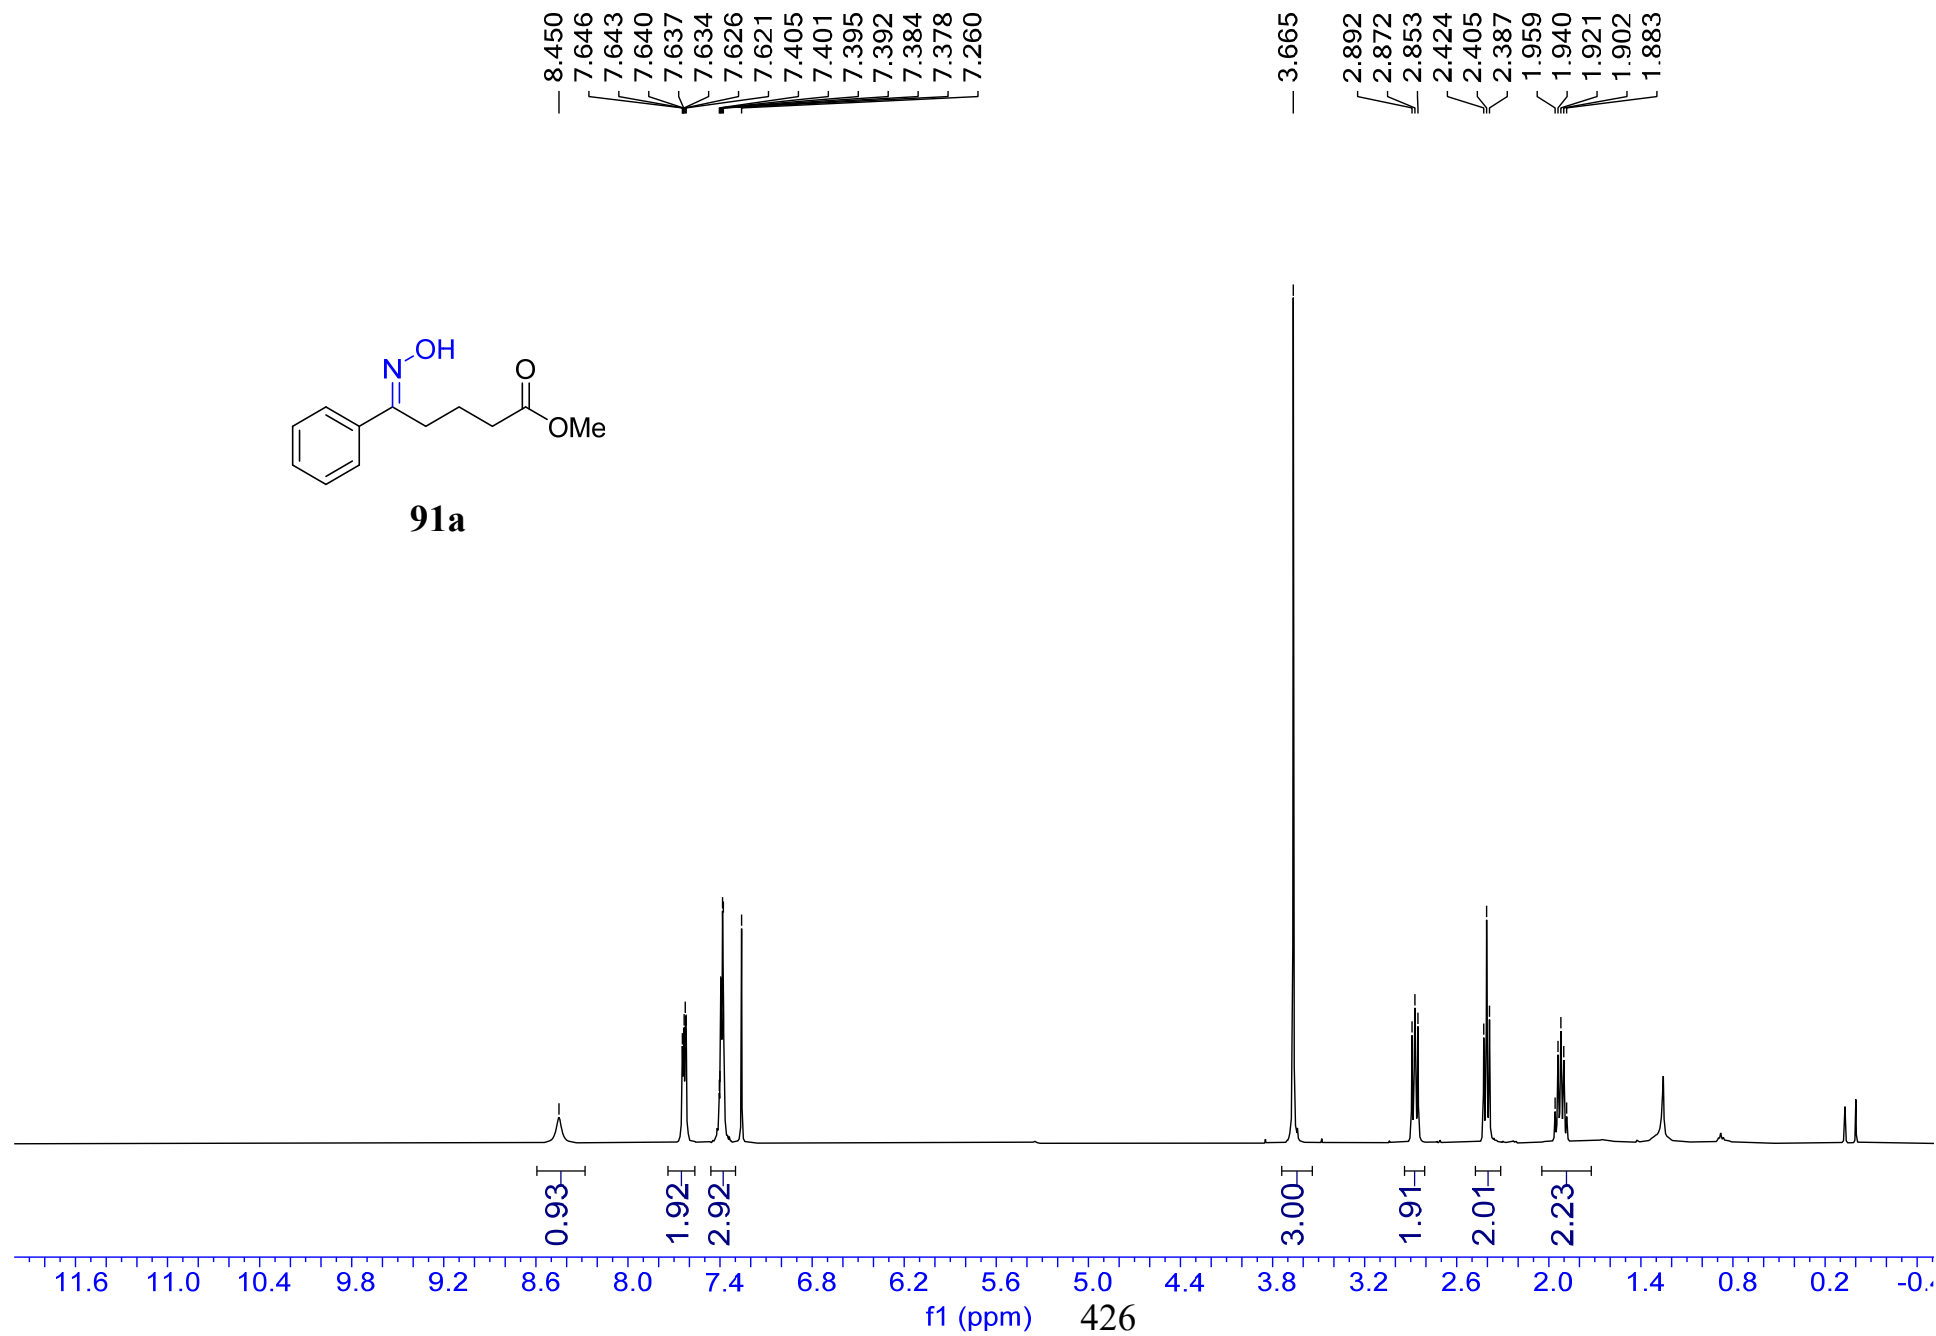

$^{13}\text{C}$  NMR 101 MHz,  $\text{CDCl}_3$

— 173.81

— 159.05

— 135.49

— 129.47

— 128.77

— 126.38

77.48

77.16

76.84

— 51.70

— 33.74

— 25.29

— 21.73

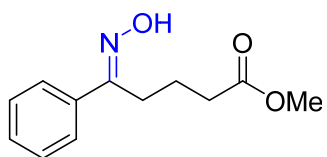

**91a**

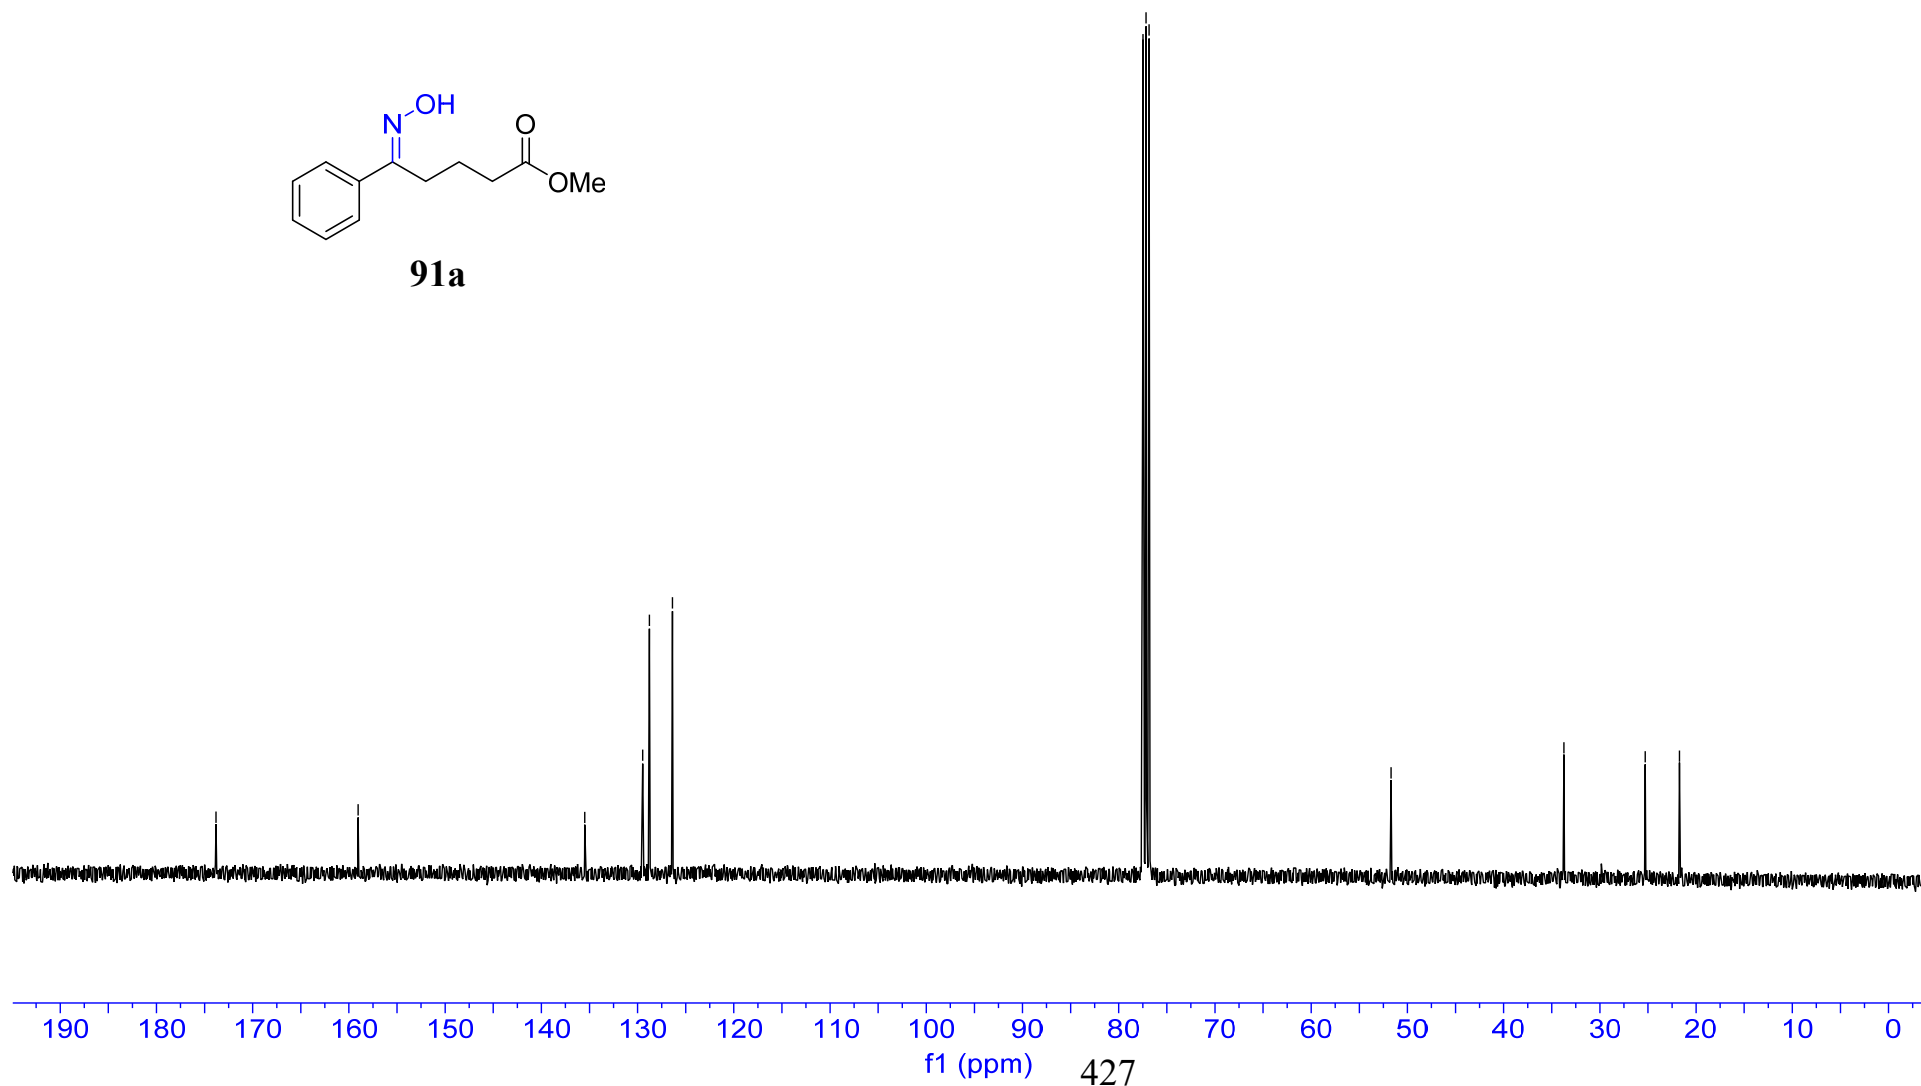

<sup>1</sup>H NMR, 400 MHz, CDCl<sub>3</sub>

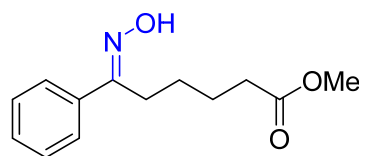

**92a**

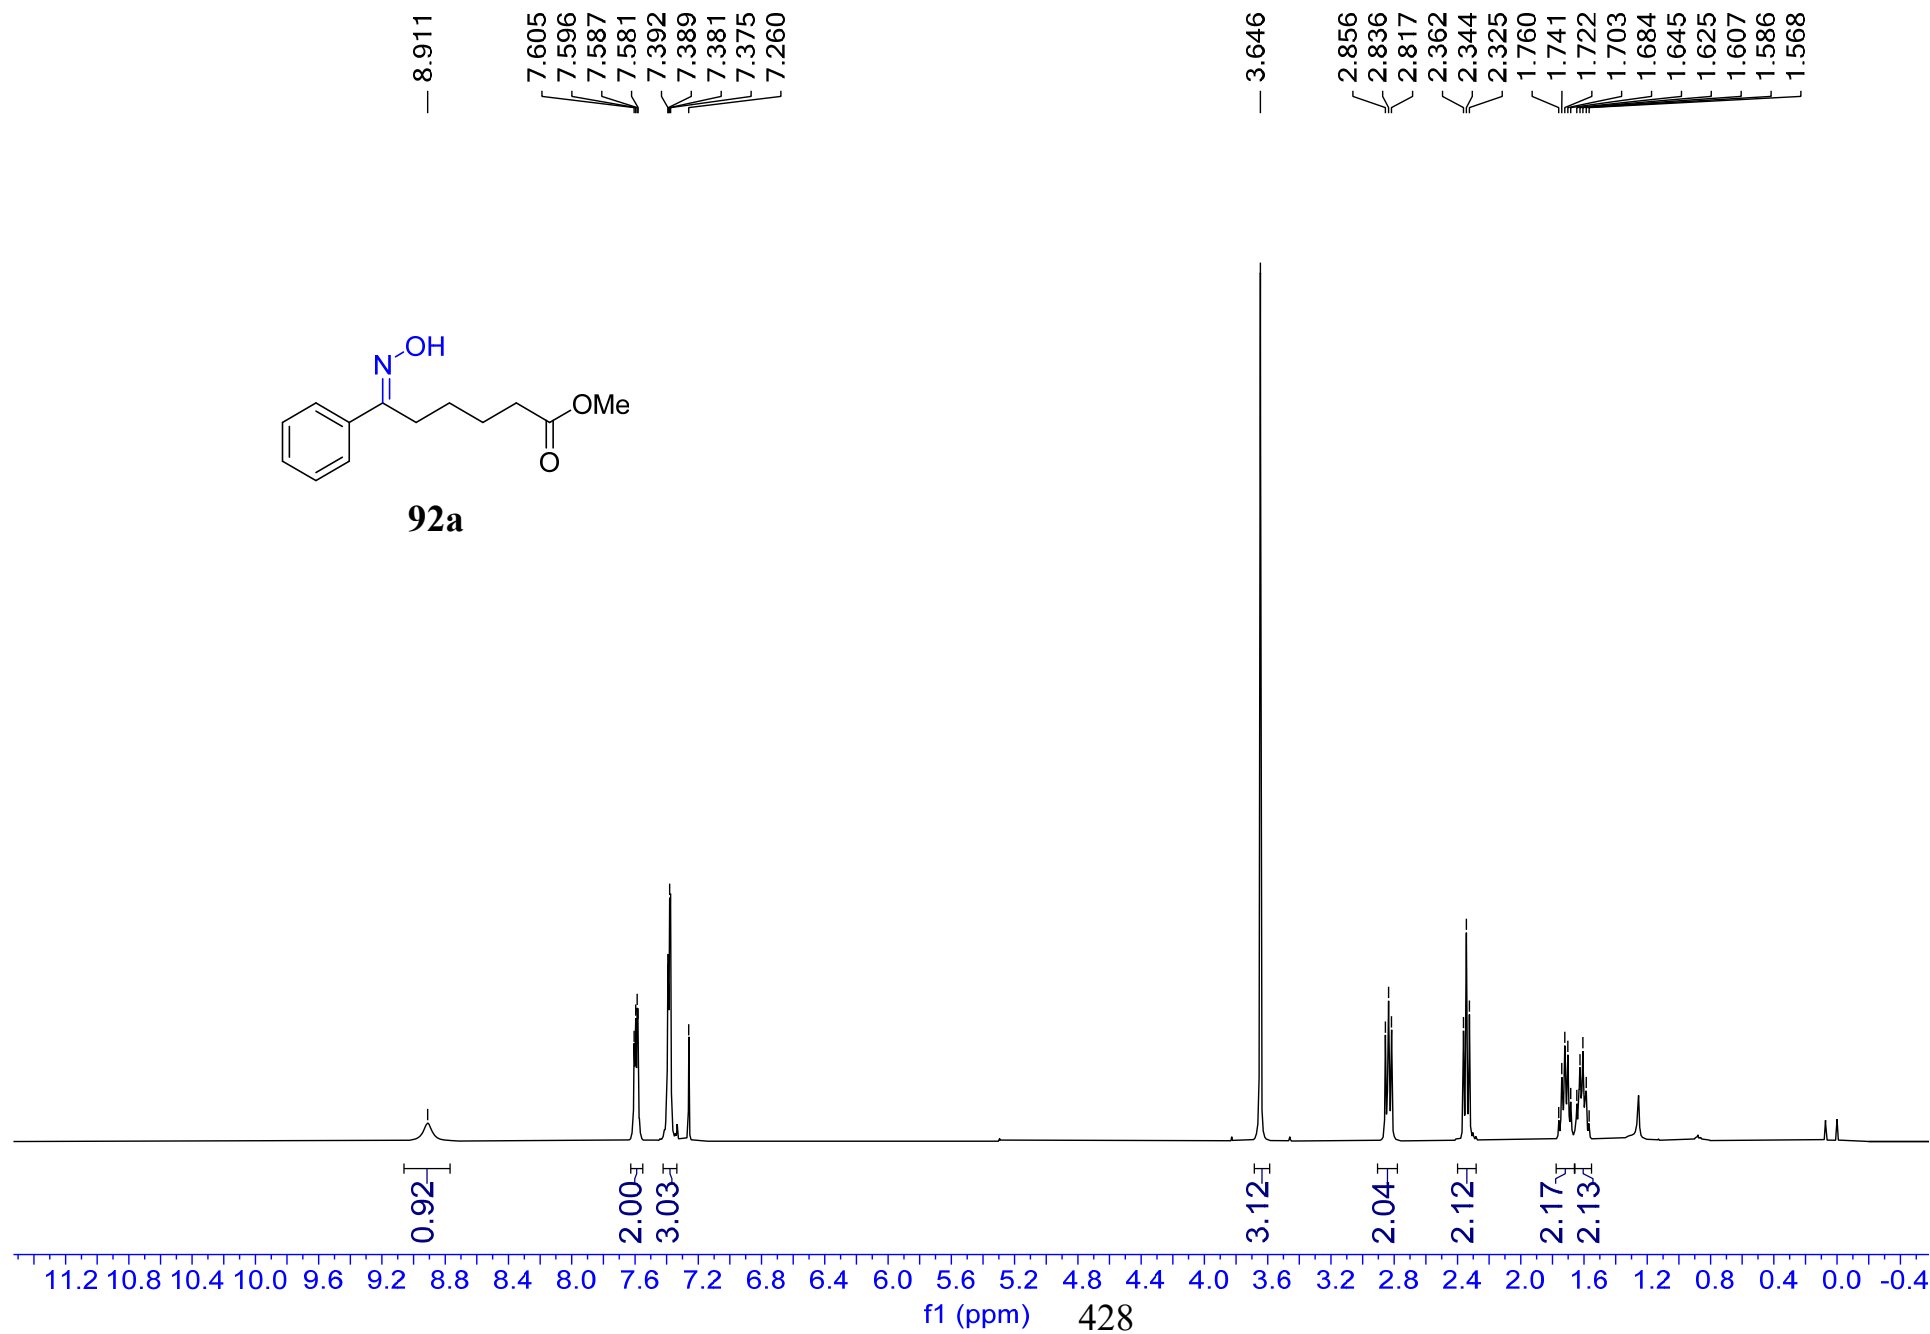



$^{13}\text{C}$  NMR 101 MHz,  $\text{CDCl}_3$

— 174.13

— 159.47

~ 135.70

~ 129.37

~ 128.73

~ 126.40

77.48

77.16

76.84

— 51.65

— 33.86

~ 25.92

~ 25.77

~ 25.08

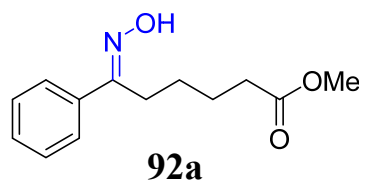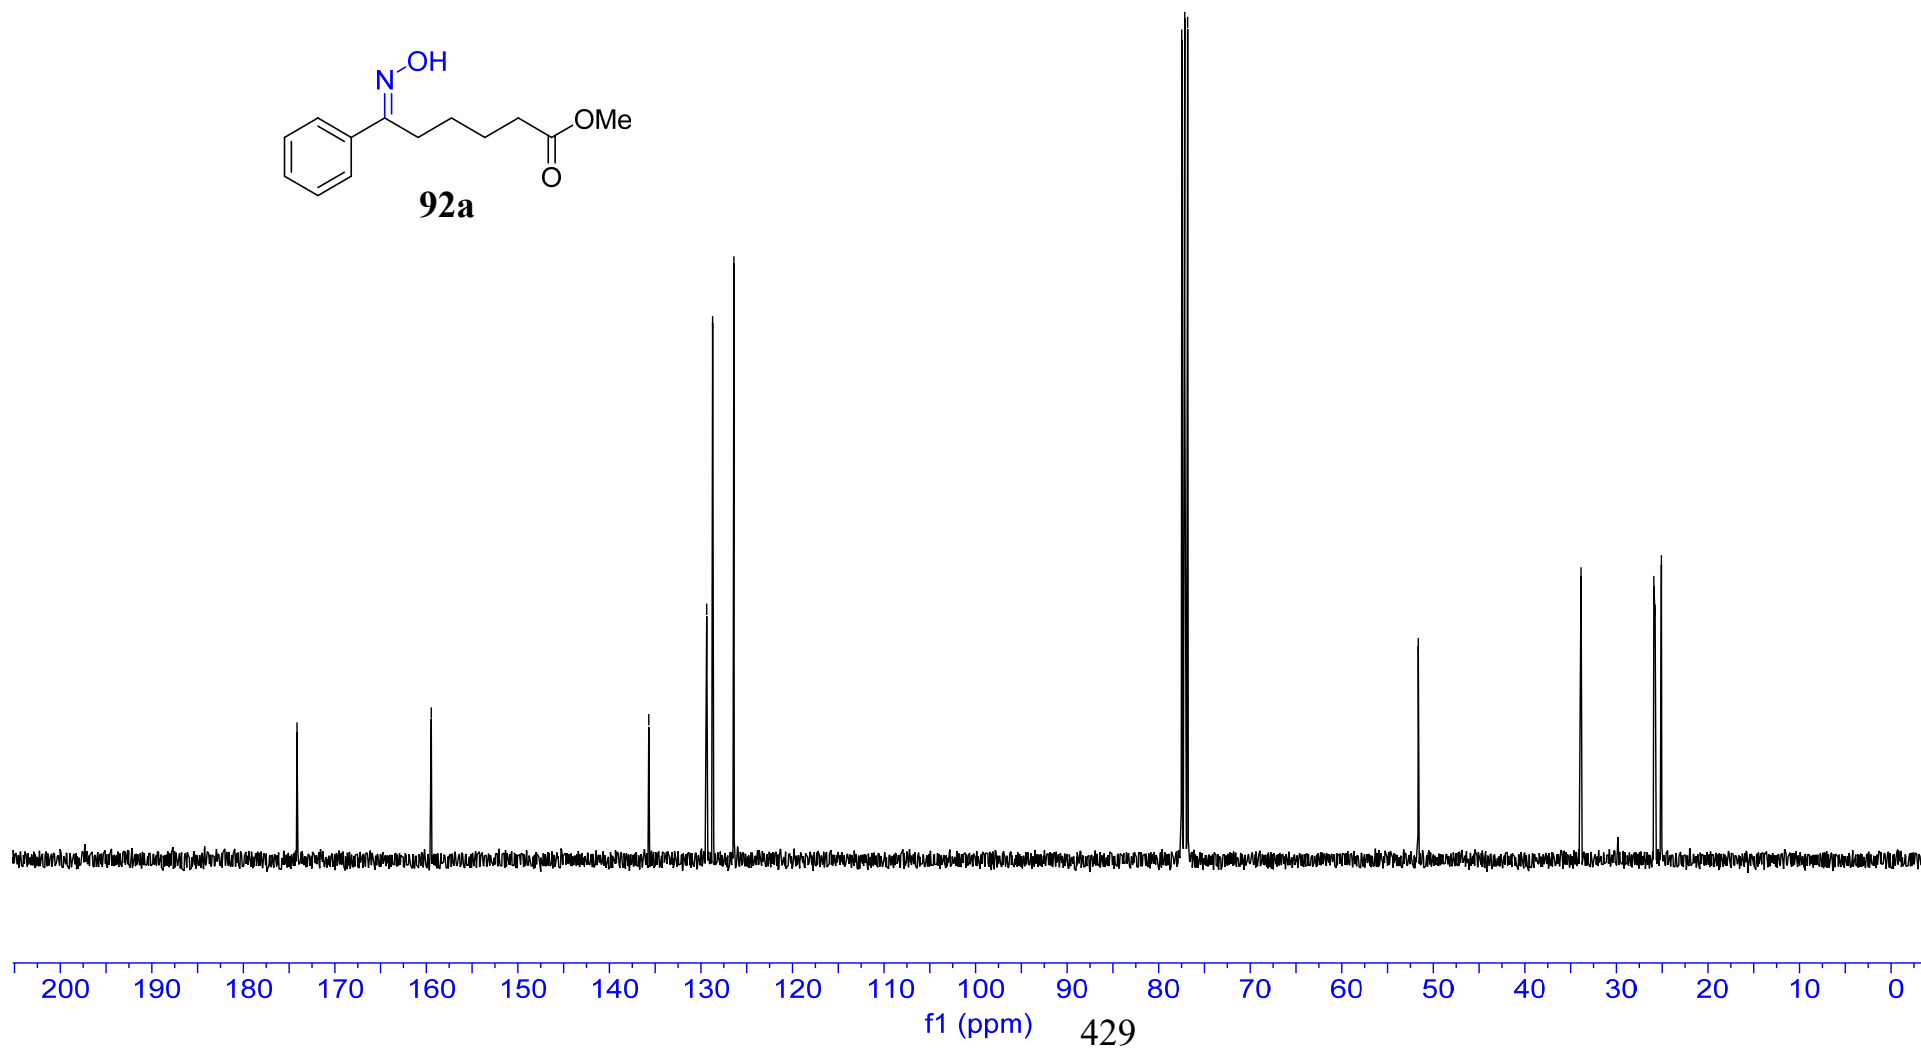

<sup>1</sup>H NMR, 400 MHz, CDCl<sub>3</sub>

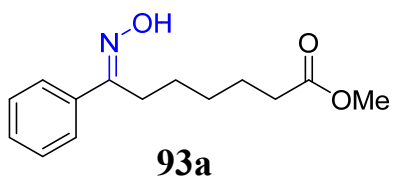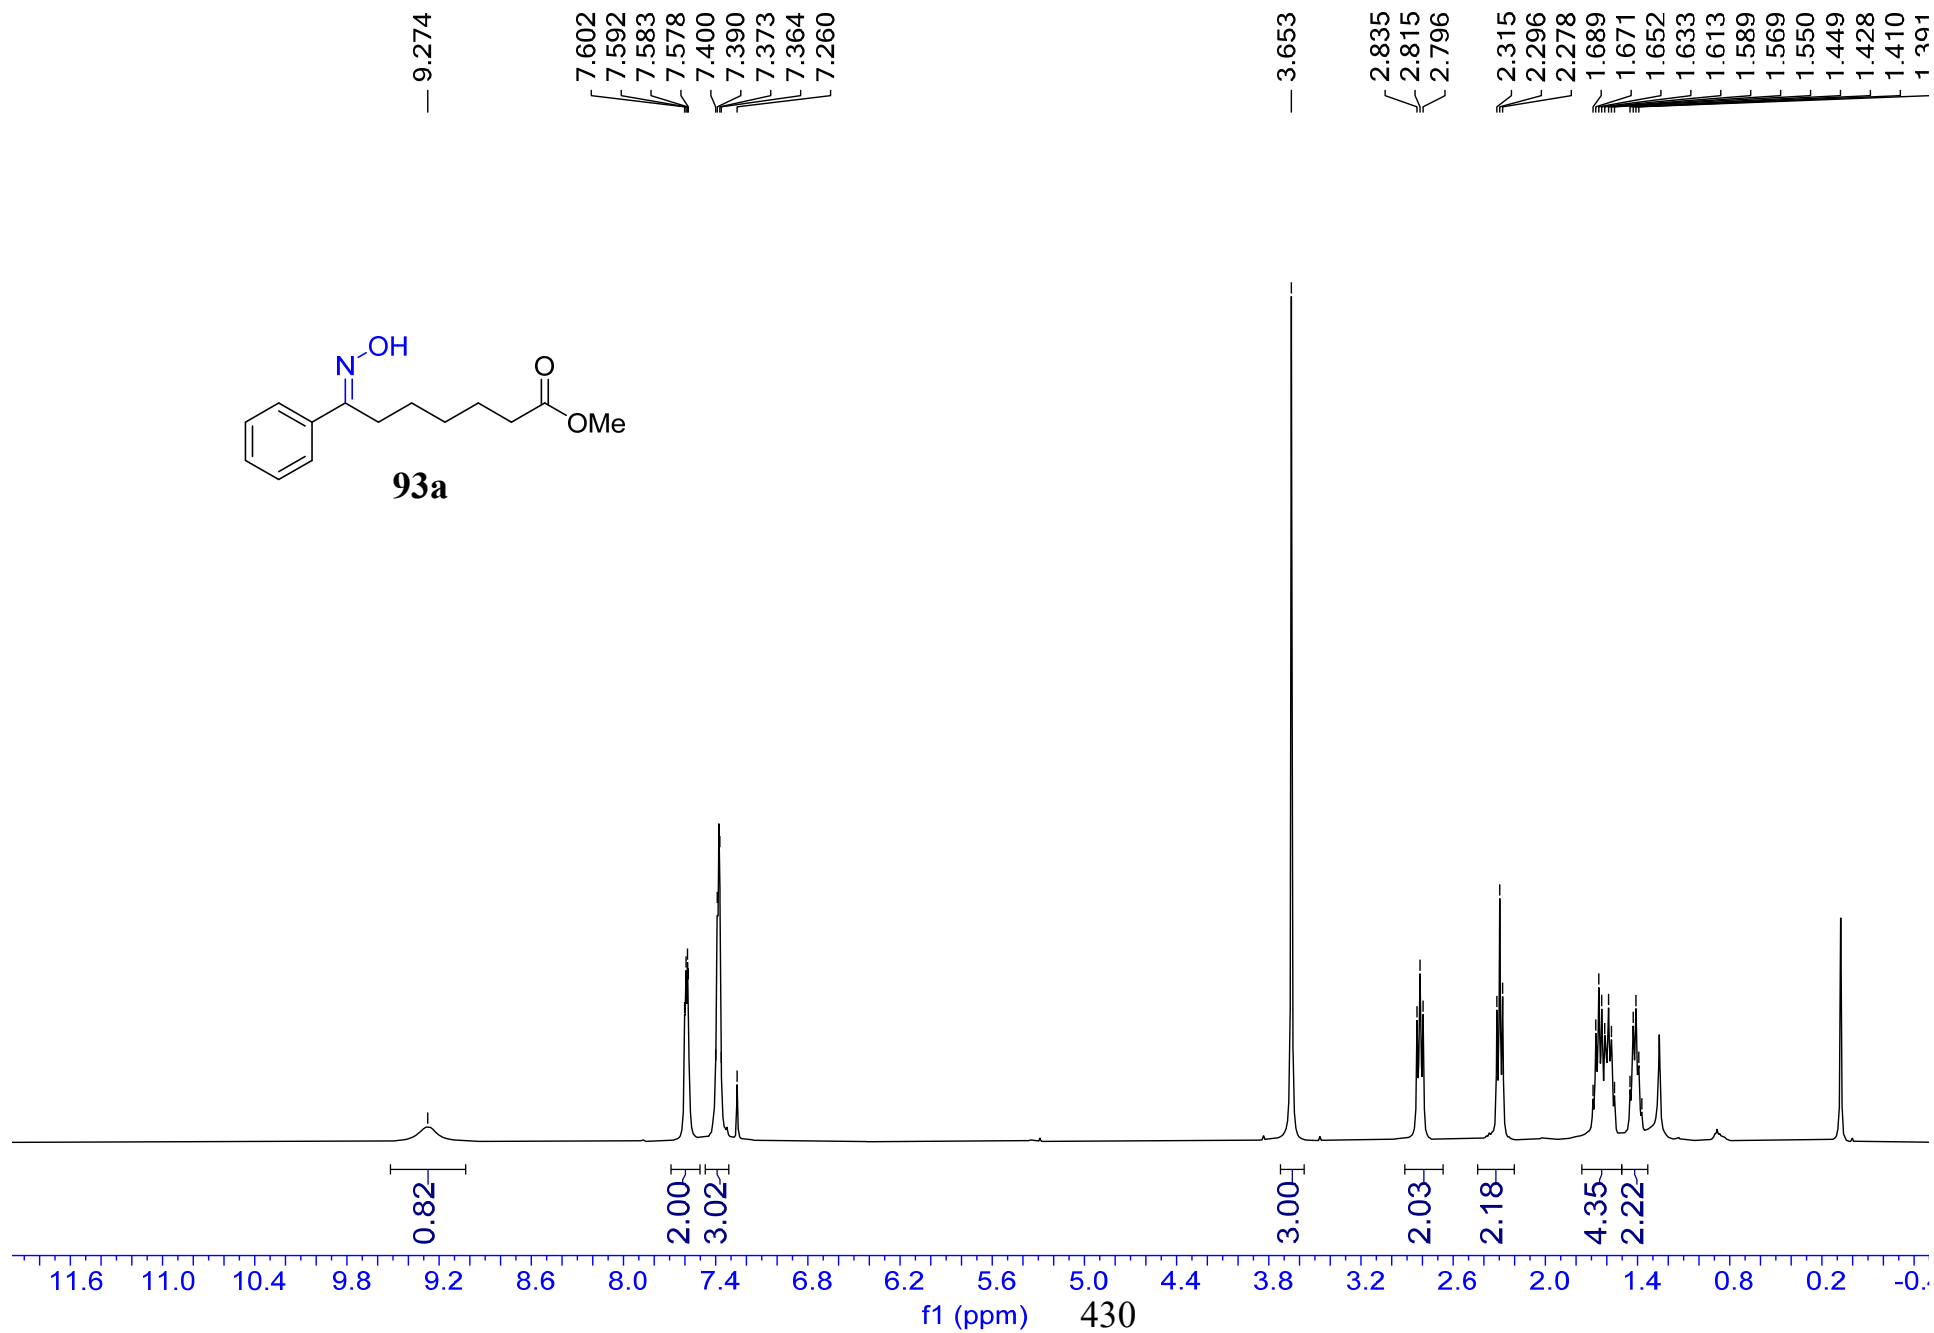

$^{13}\text{C}$  NMR 101 MHz,  $\text{CDCl}_3$

— 174.34

— 159.65

— 135.80

— 129.31

— 128.70

— 126.38

— 77.48

— 77.16

— 76.84

— 51.62

— 34.04

— 29.34

— 26.09

— 26.05

— 24.73

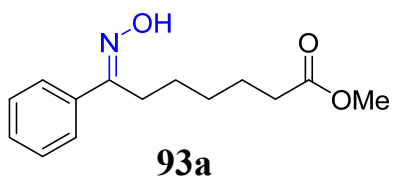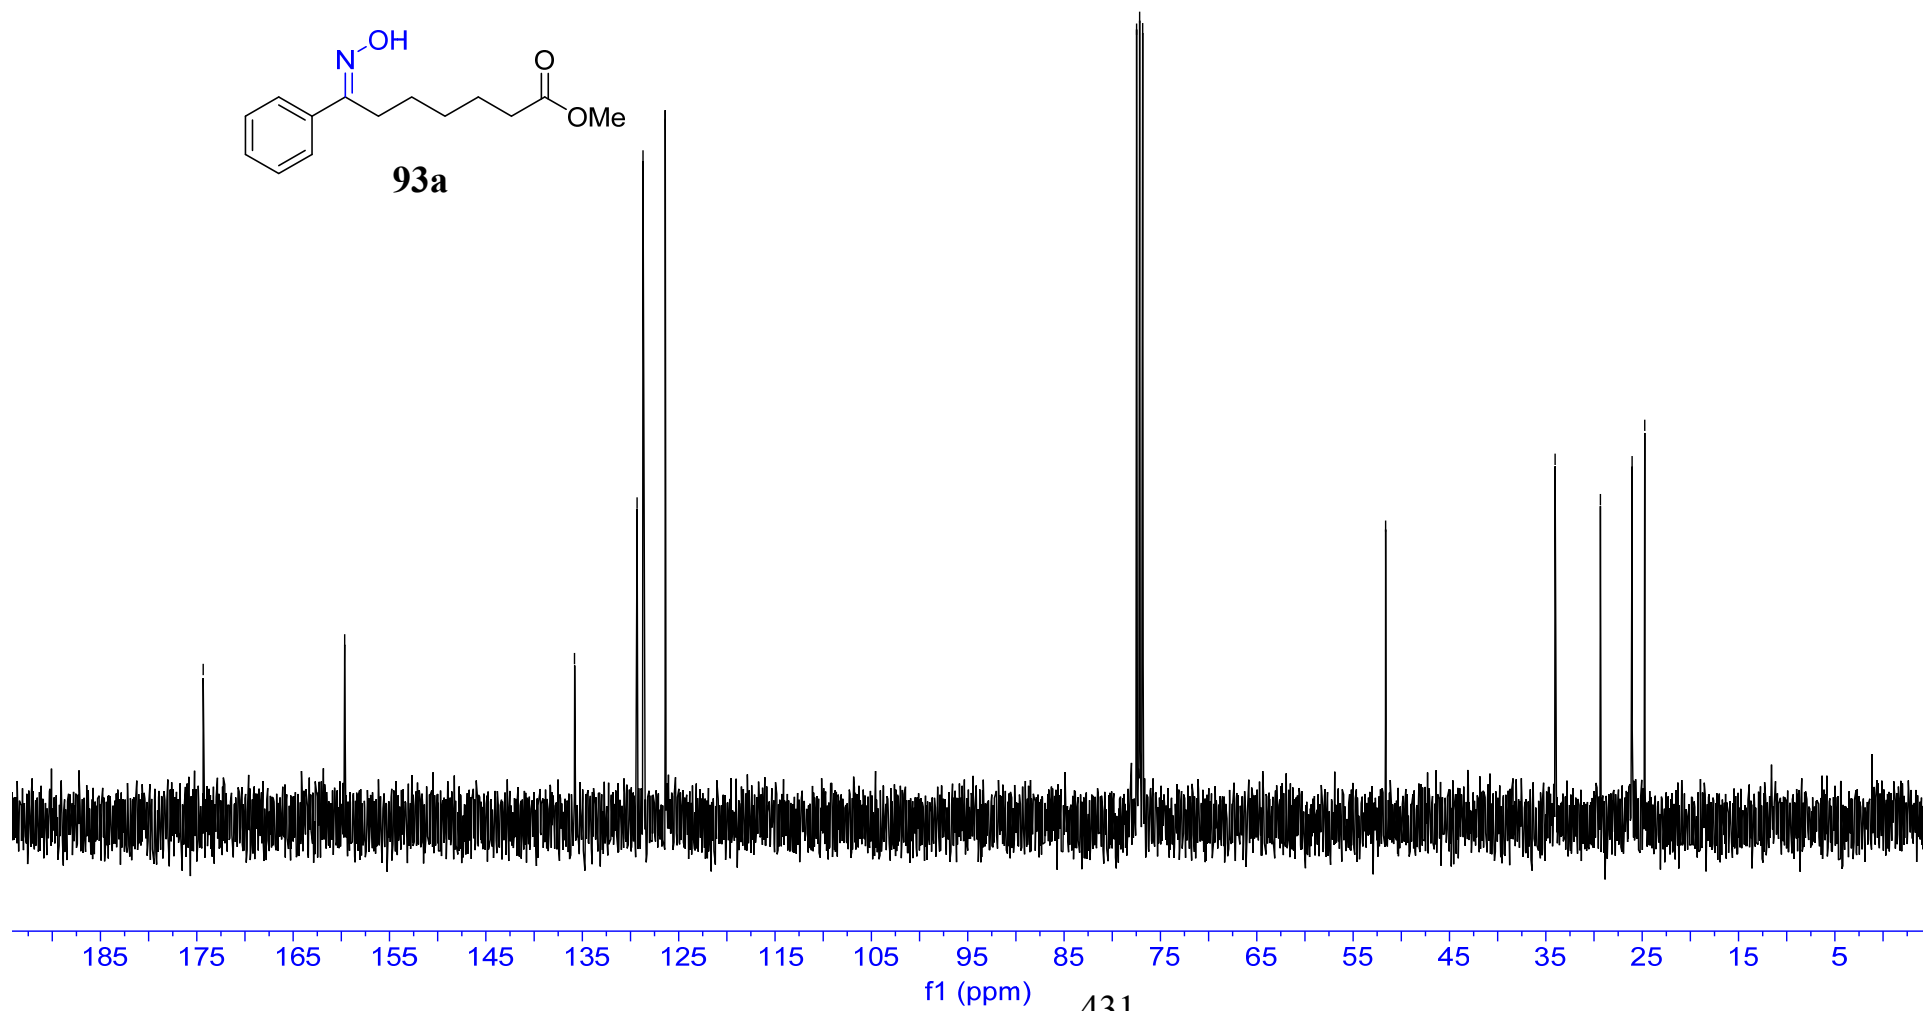

<sup>1</sup>H NMR, 400 MHz, CDCl<sub>3</sub>

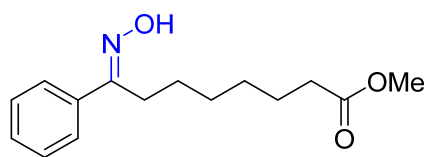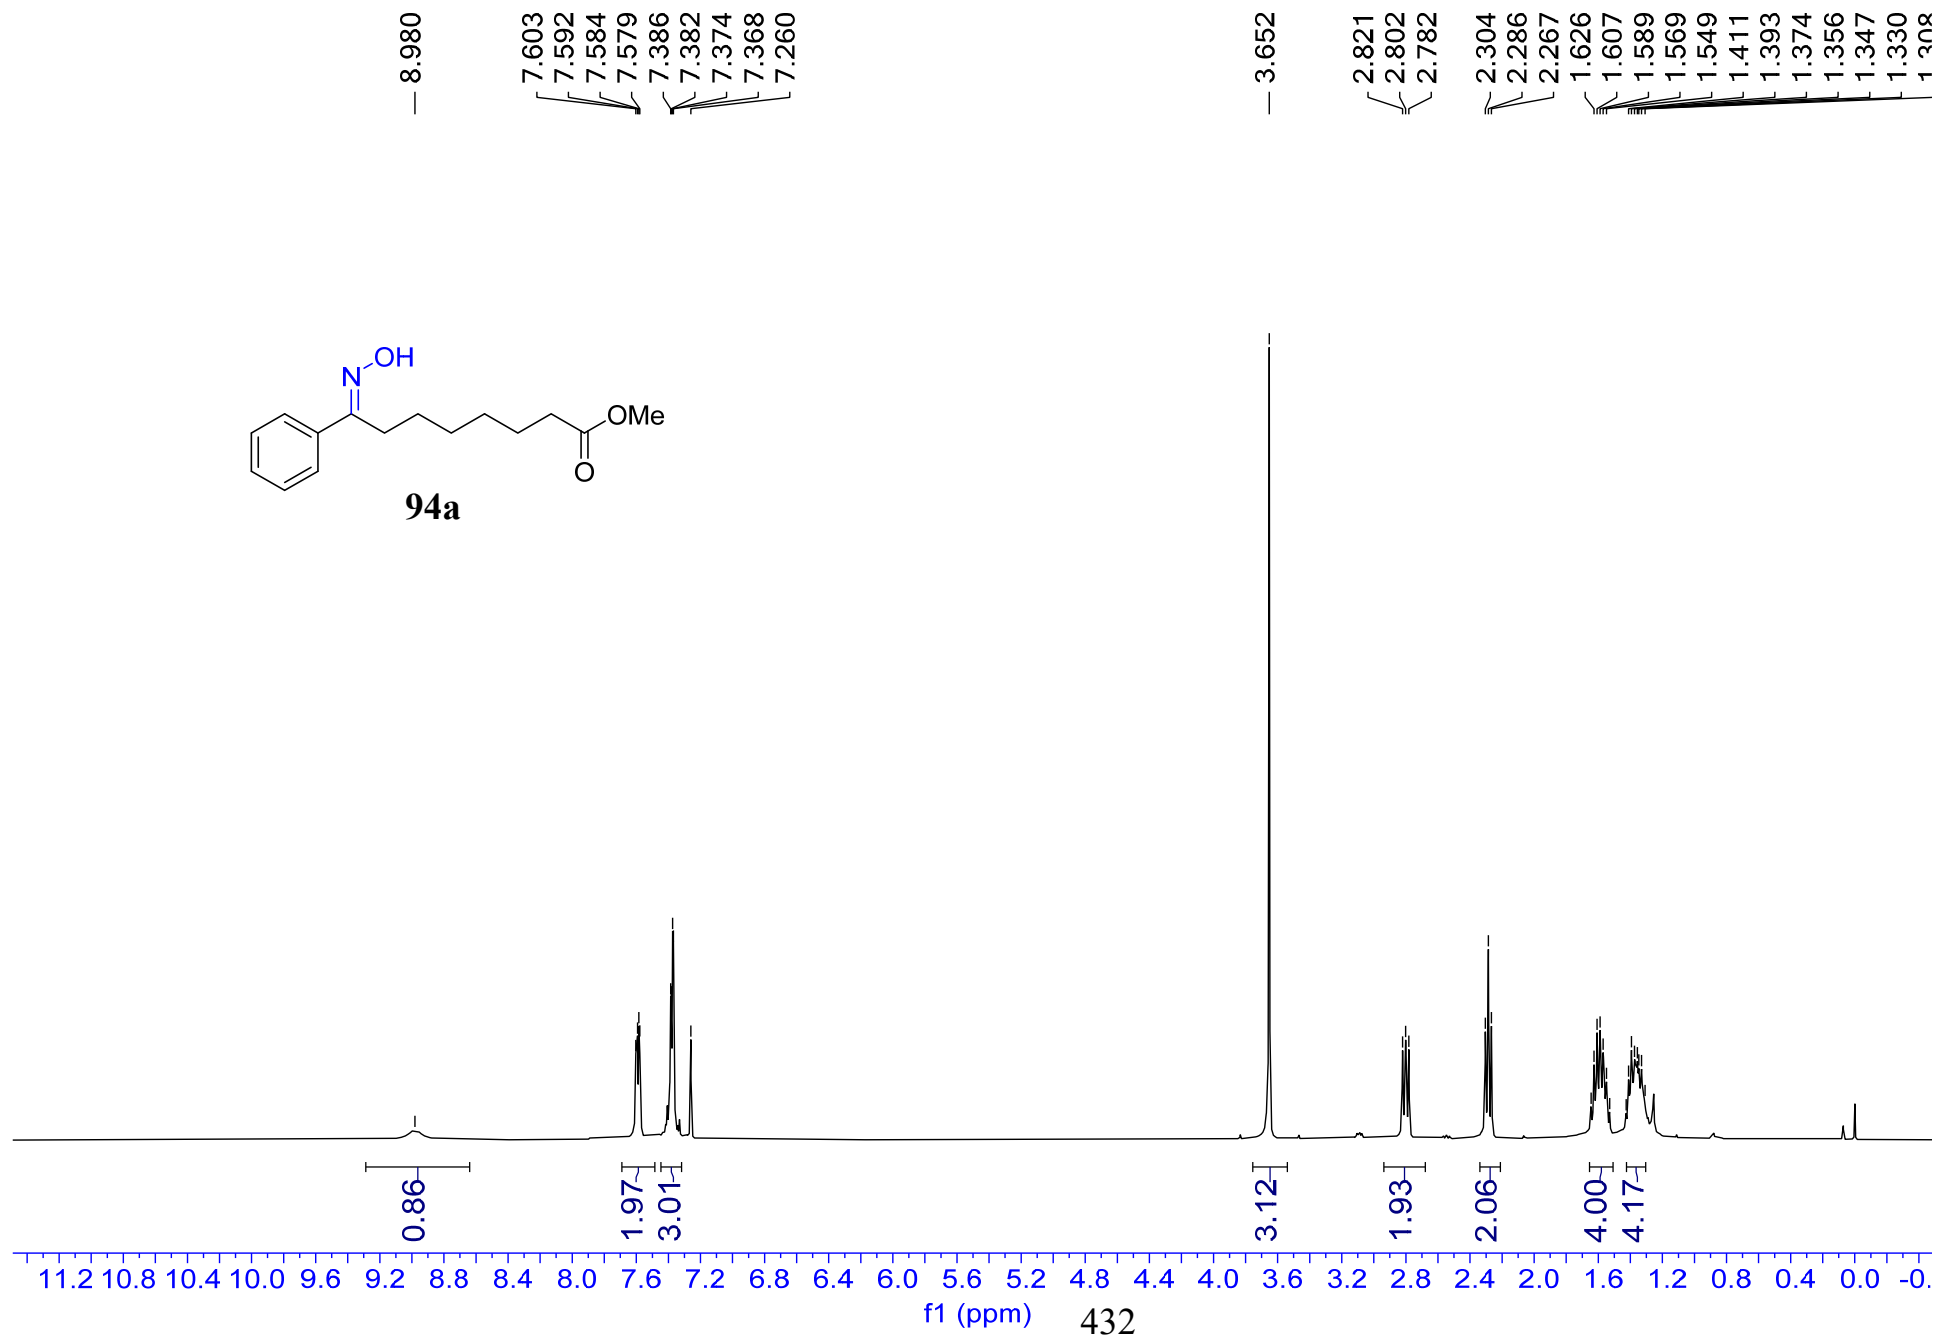

<sup>13</sup>C NMR 101 MHz, CDCl<sub>3</sub>

— 174.42

— 159.75

— 135.89

└ 129.25

└ 128.66

└ 126.39

└ 77.48

└ 77.16

└ 76.84

— 51.59

└ 34.12

└ 29.49

└ 28.92

└ 26.23

└ 26.20

└ 24.90

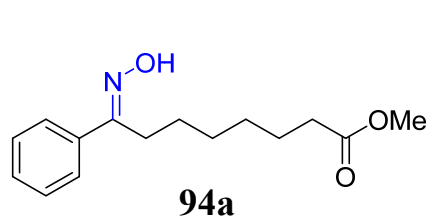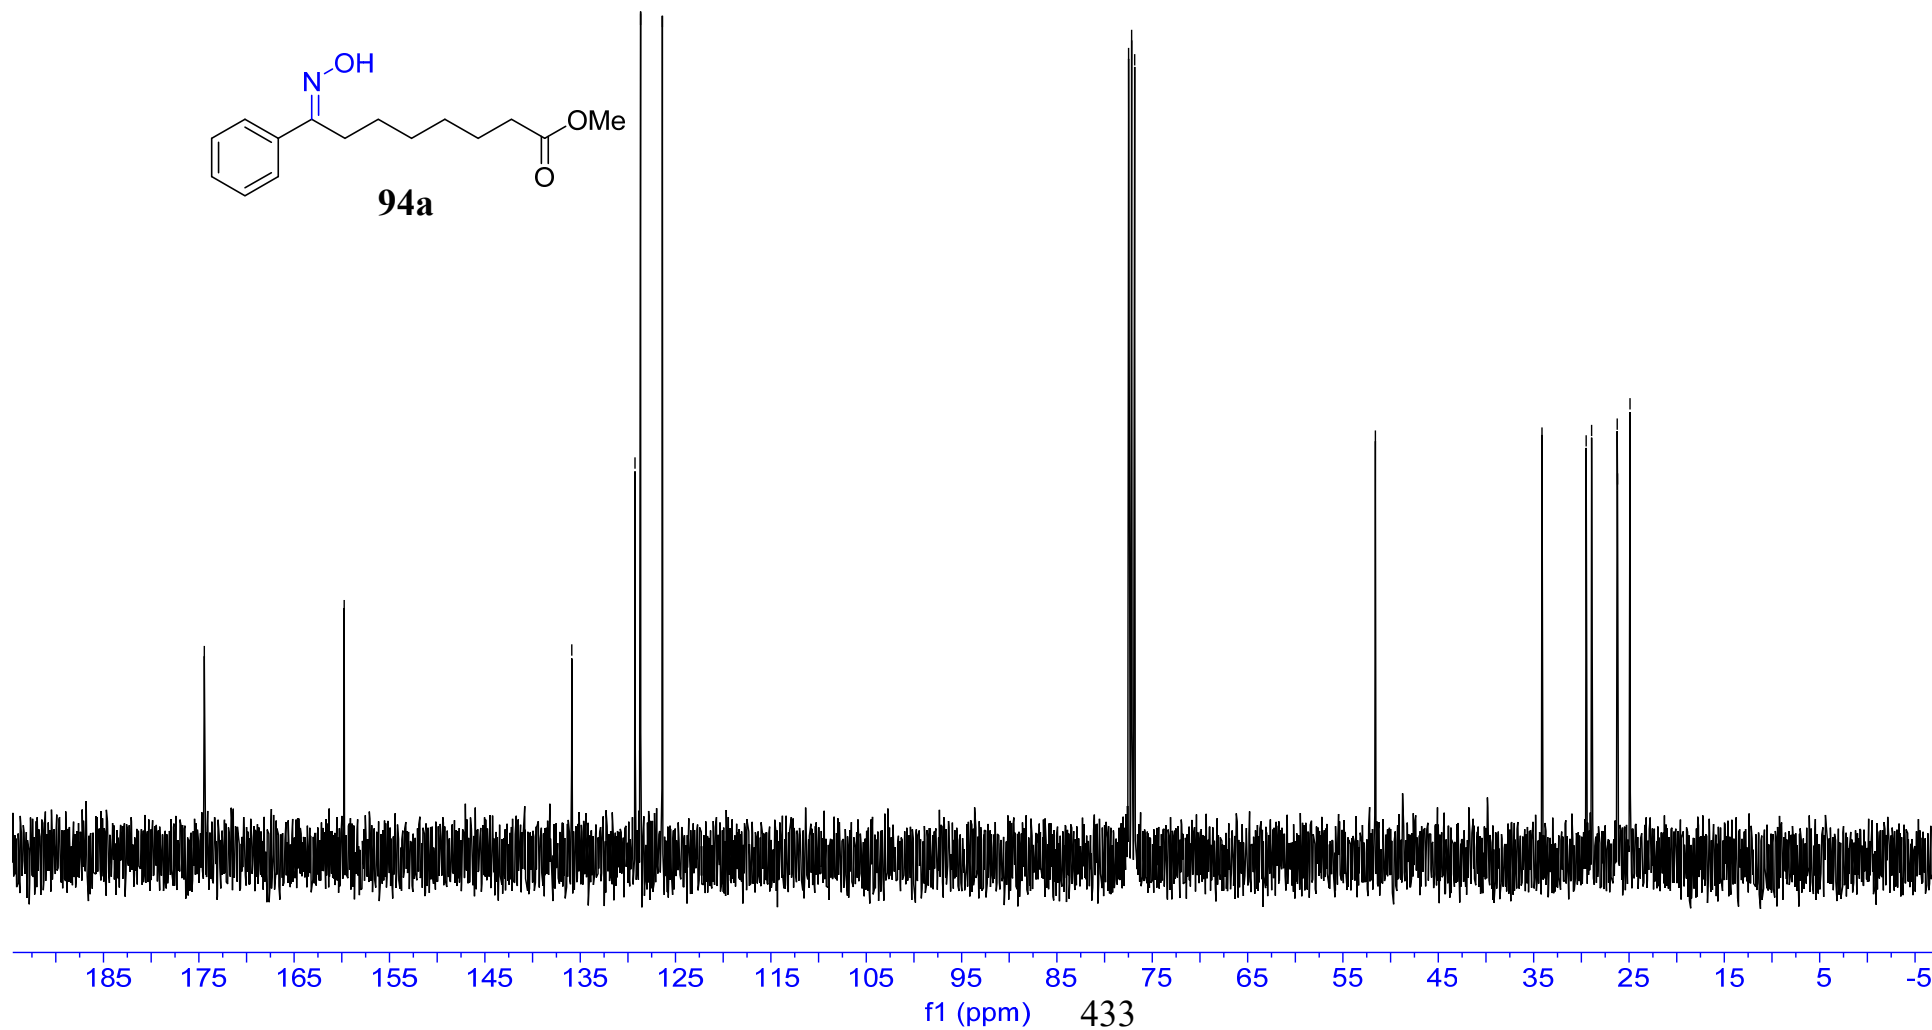

<sup>1</sup>H NMR, 400 MHz, CDCl<sub>3</sub>

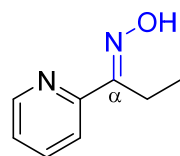

95a (α-product)

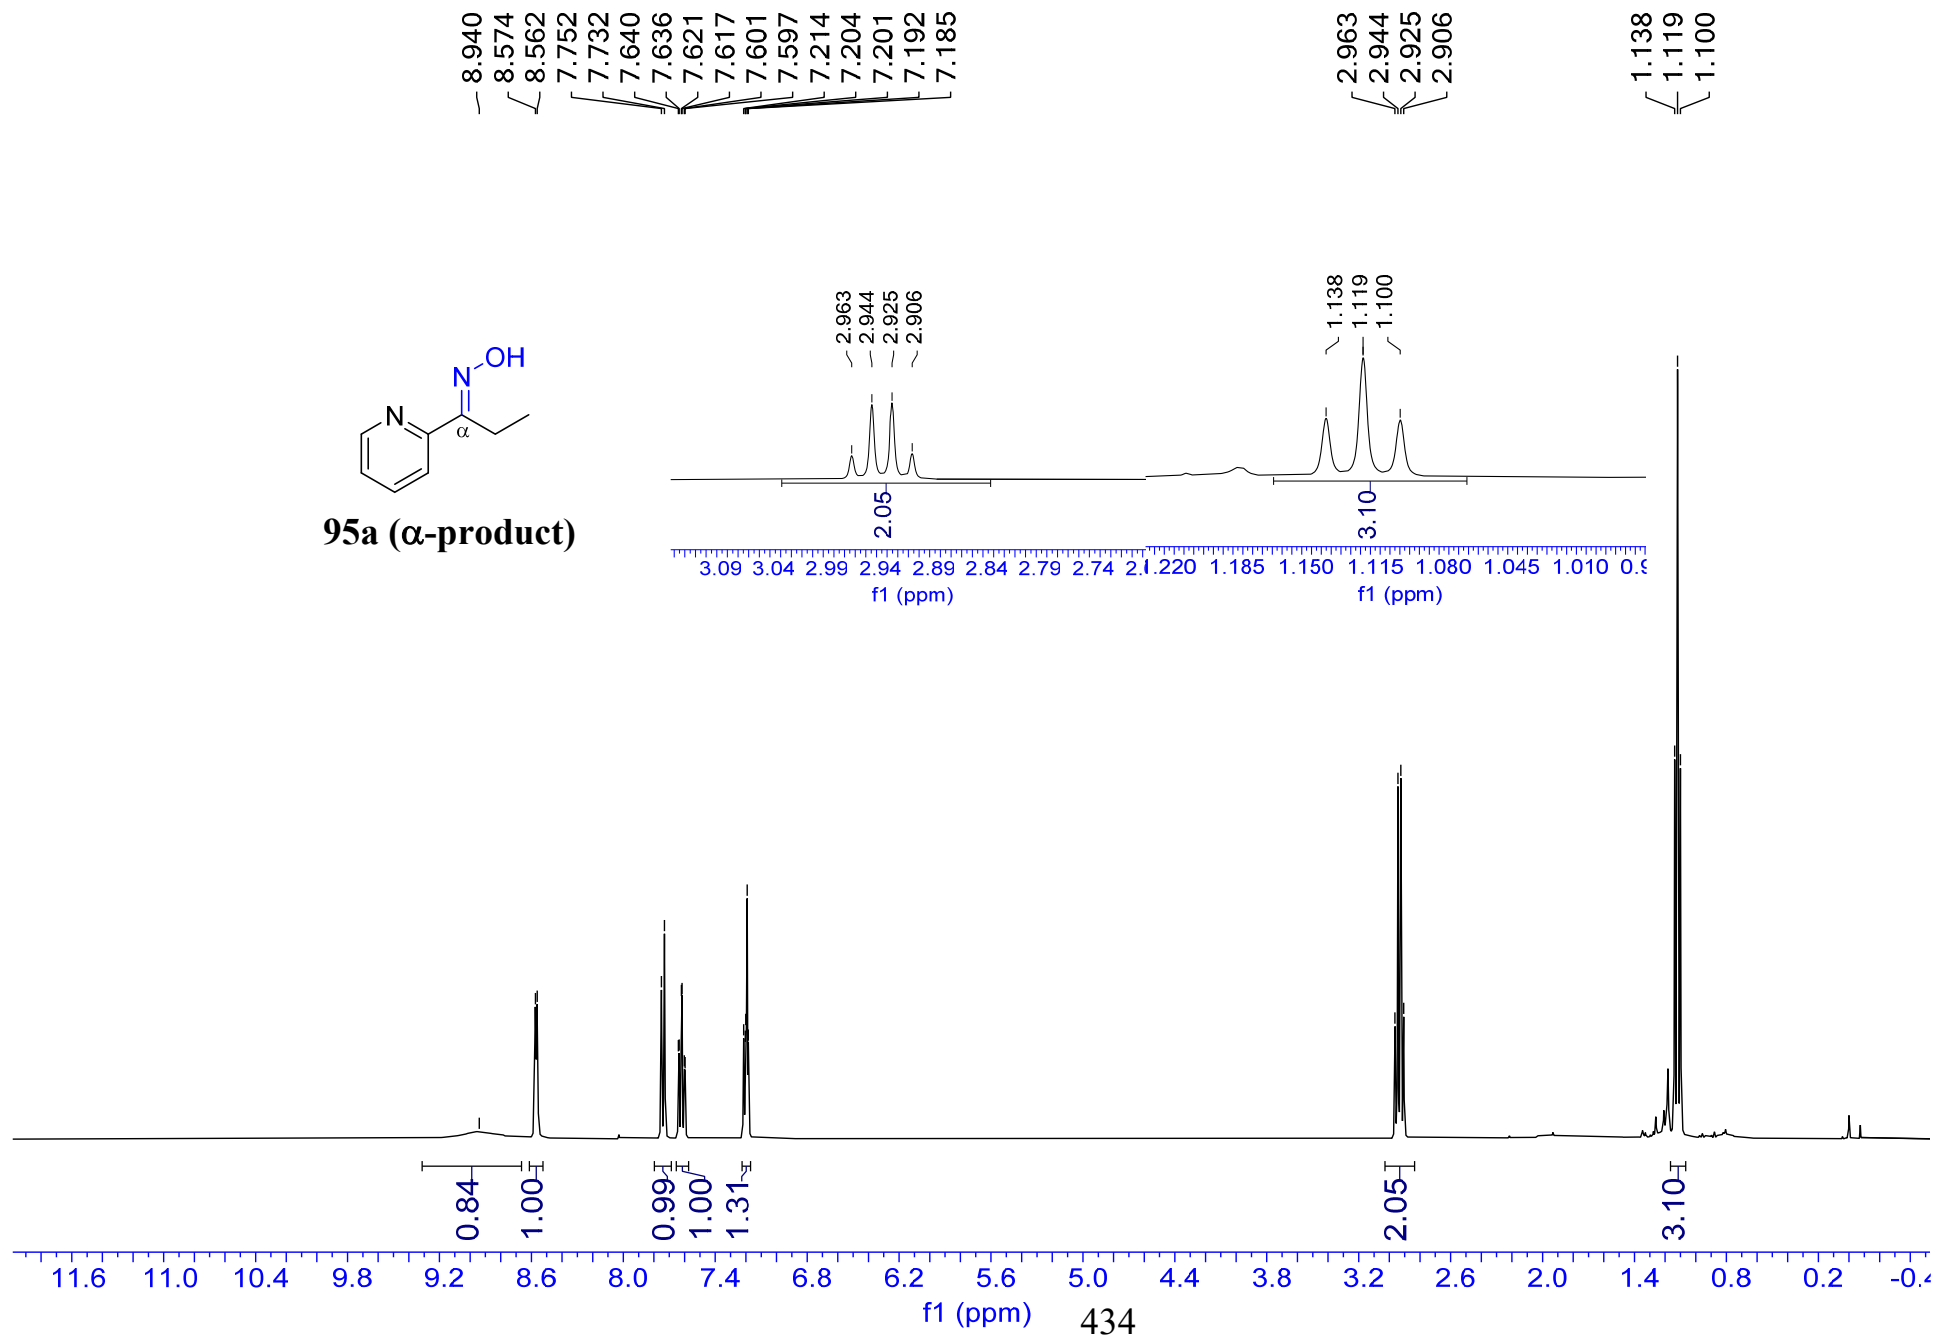

$^{13}\text{C}$  NMR 101 MHz,  $\text{CDCl}_3$

— 161.65  
— 153.83  
— 149.16  
— 136.54  
— 123.79  
— 121.09  
— 77.48  
— 77.16  
— 76.84  
— 18.27  
— 10.92

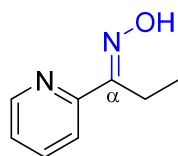

**95a (α-product)**

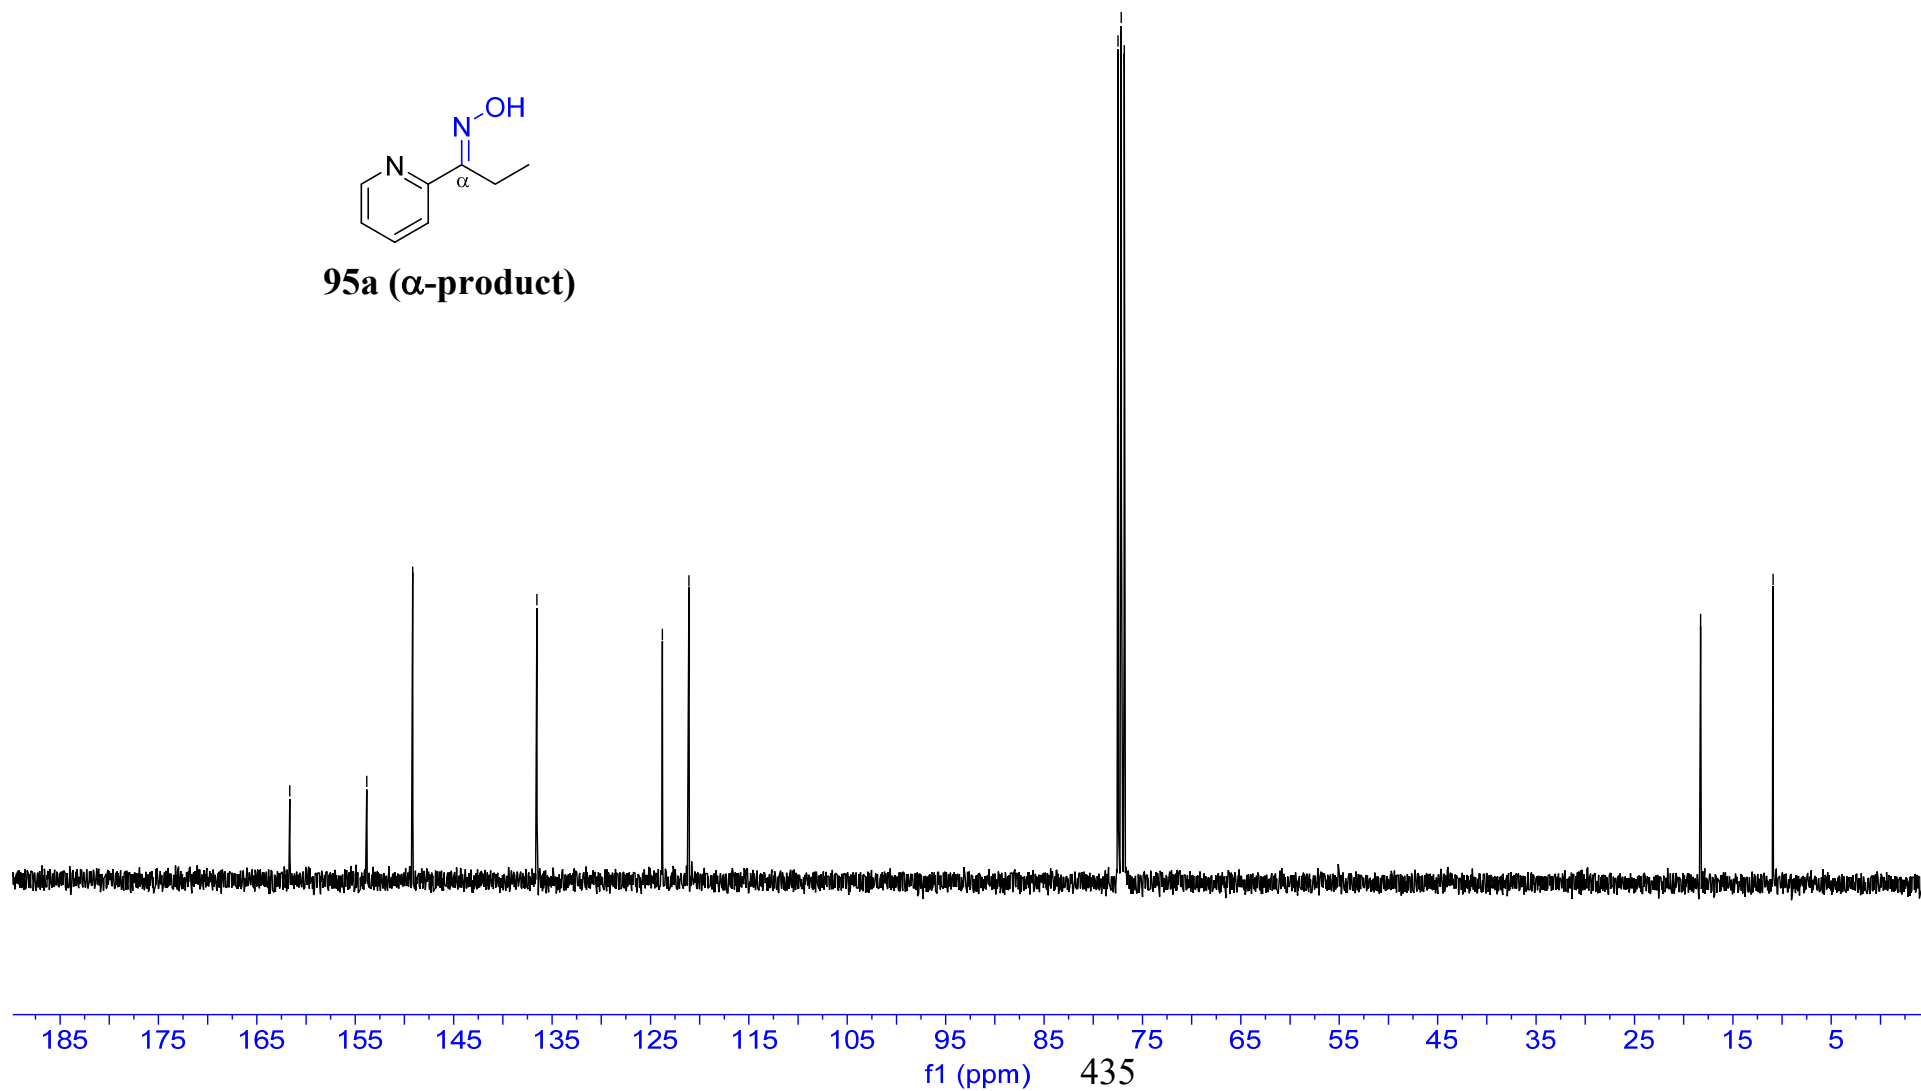

<sup>1</sup>H NMR, 400 MHz, CDCl<sub>3</sub>

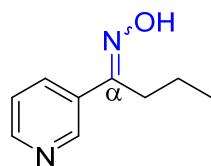

**96(α-product)**  
**E/Z=4:1**

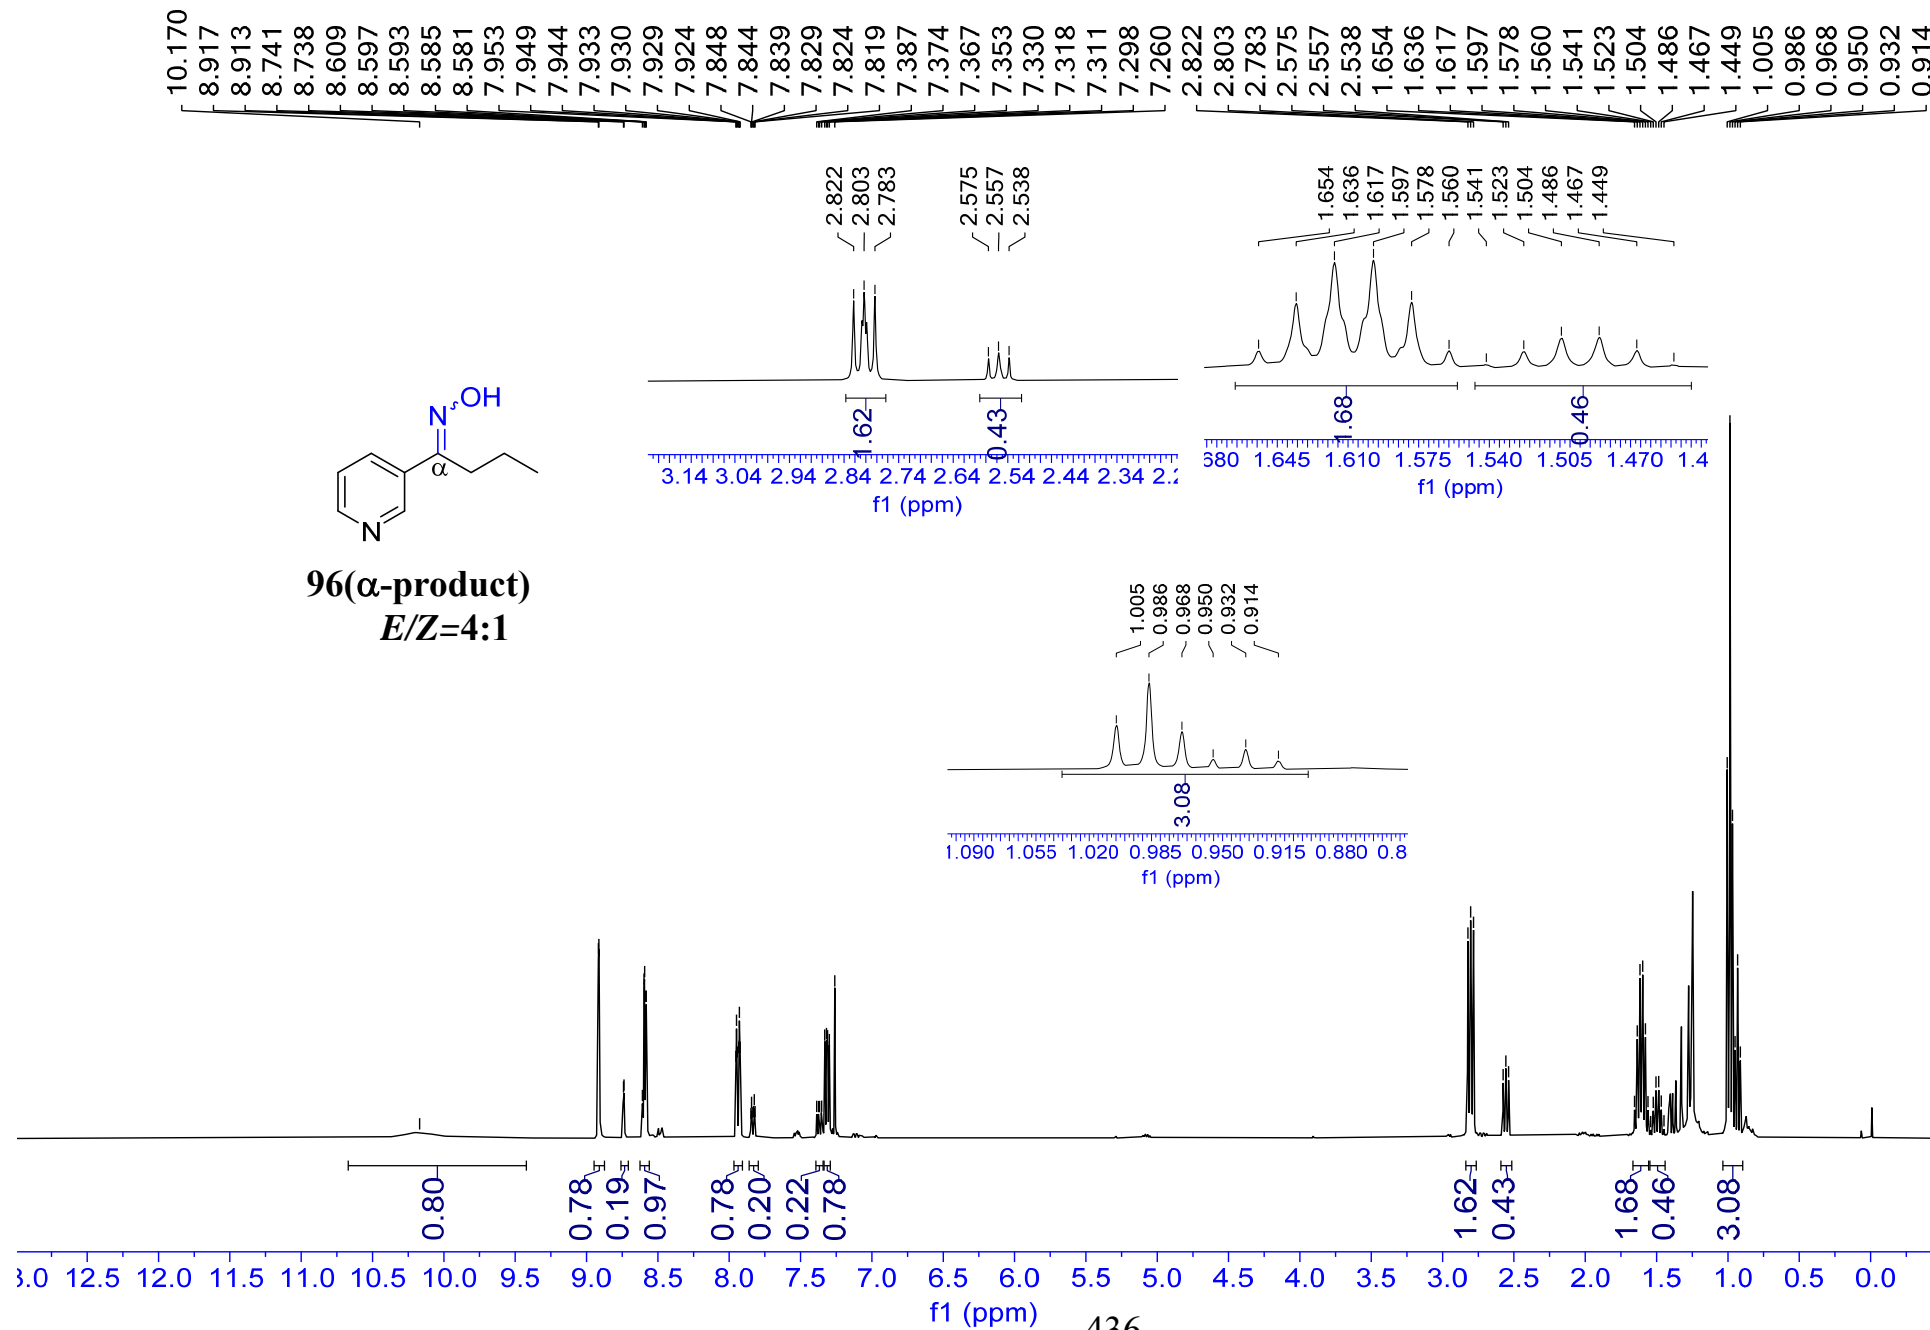



<sup>13</sup>C NMR 101 MHz, CDCl<sub>3</sub>

— 157.12  
└─ 149.69  
└─ 149.56  
└─ 148.87  
└─ 147.69  
  
└─ 136.10  
└─ 133.92  
└─ 132.21  
  
└─ 123.52  
└─ 123.33

└─ 77.48  
└─ 77.16  
└─ 76.84

— 37.04  
└─ 29.83  
└─ 27.70  
  
— 19.81  
└─ 14.33  
└─ 13.67

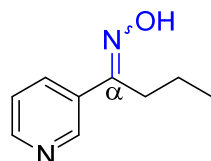

**96a (α-product)**  
*E/Z=4:1*

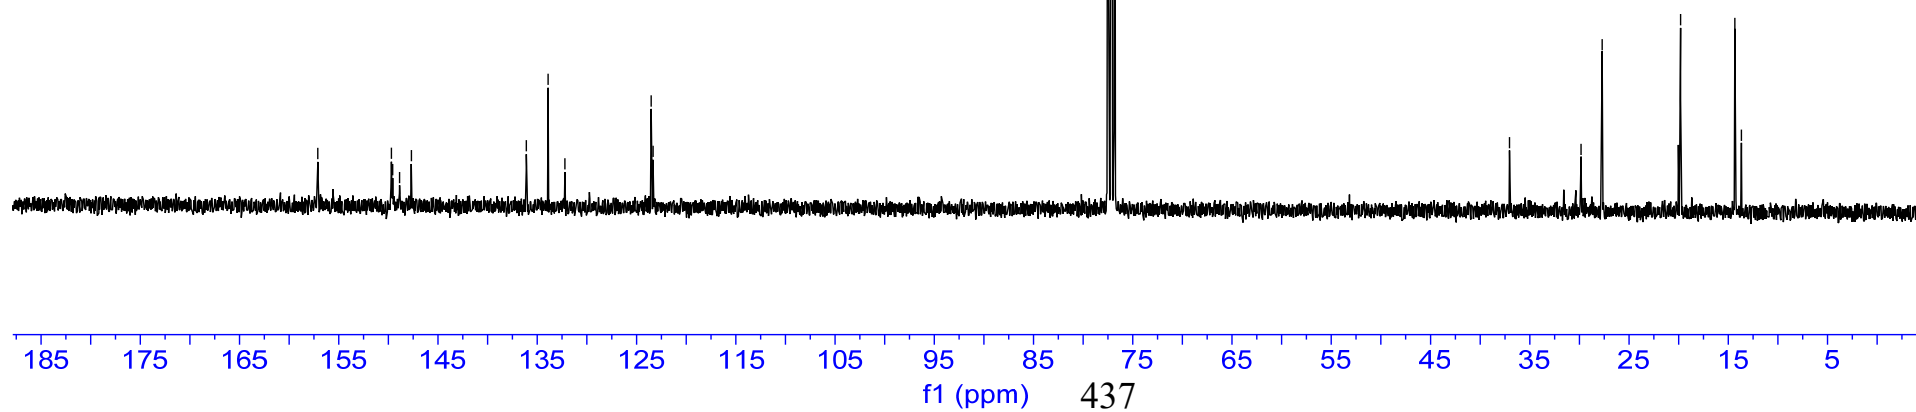

<sup>1</sup>H NMR, 400 MHz, CDCl<sub>3</sub>

9.637  
8.492  
8.486  
8.464  
8.459  
8.449  
8.438  
8.426  
8.422  
7.574  
7.554  
7.530  
7.510  
7.260  
7.233  
7.224  
7.212  
7.203  
7.193

2.863  
2.845  
2.824  
2.687  
2.672  
2.665  
2.647  
2.524  
2.509  
2.502  
2.484  
1.915  
1.908  
1.819

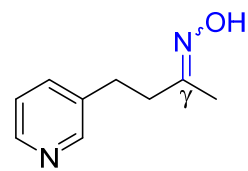

**96a(γ-product)**  
***E/Z*=2.4:1**

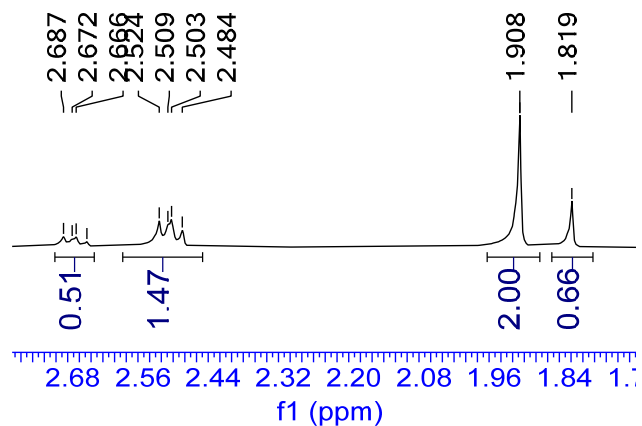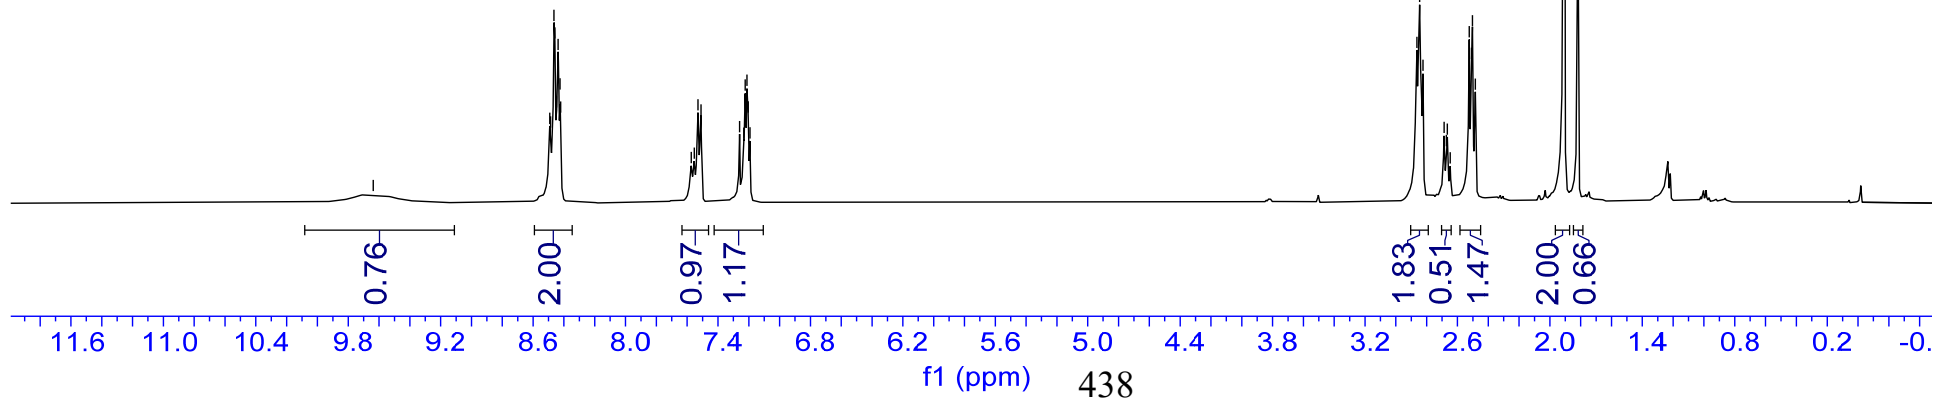

<sup>13</sup>C NMR 101 MHz, CDCl<sub>3</sub>

157.07  
156.68  
149.75  
149.67  
147.52  
147.44  
136.79  
136.75  
136.21  
136.18  
— 123.55

77.48  
77.16  
76.84

— 37.26  
30.29  
29.72  
28.75  
— 20.42  
— 13.91

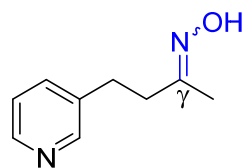

**96a (γ-product)**  
*E/Z*=2.4:1

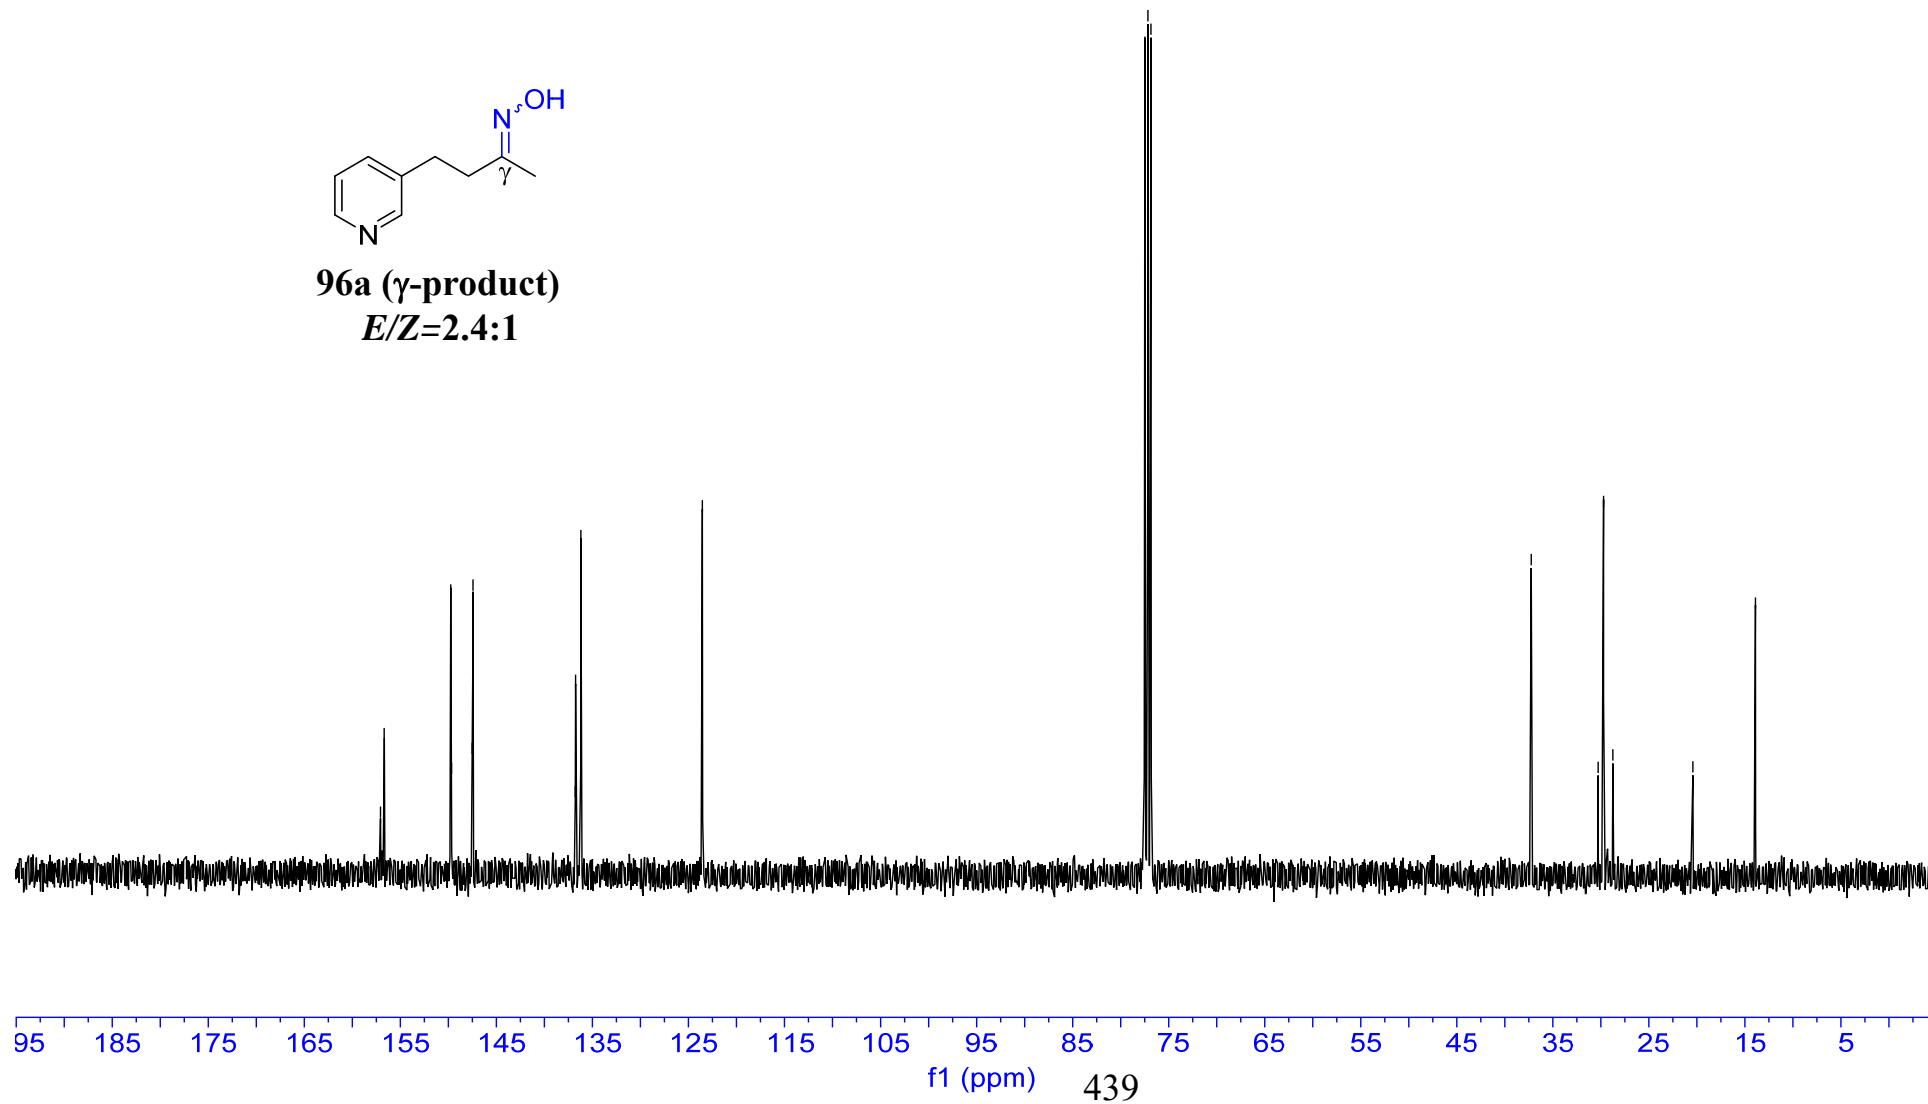

<sup>1</sup>H NMR, 400 MHz, DMSO-d<sub>6</sub>

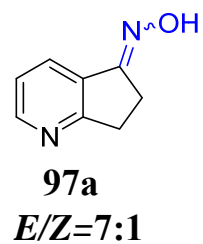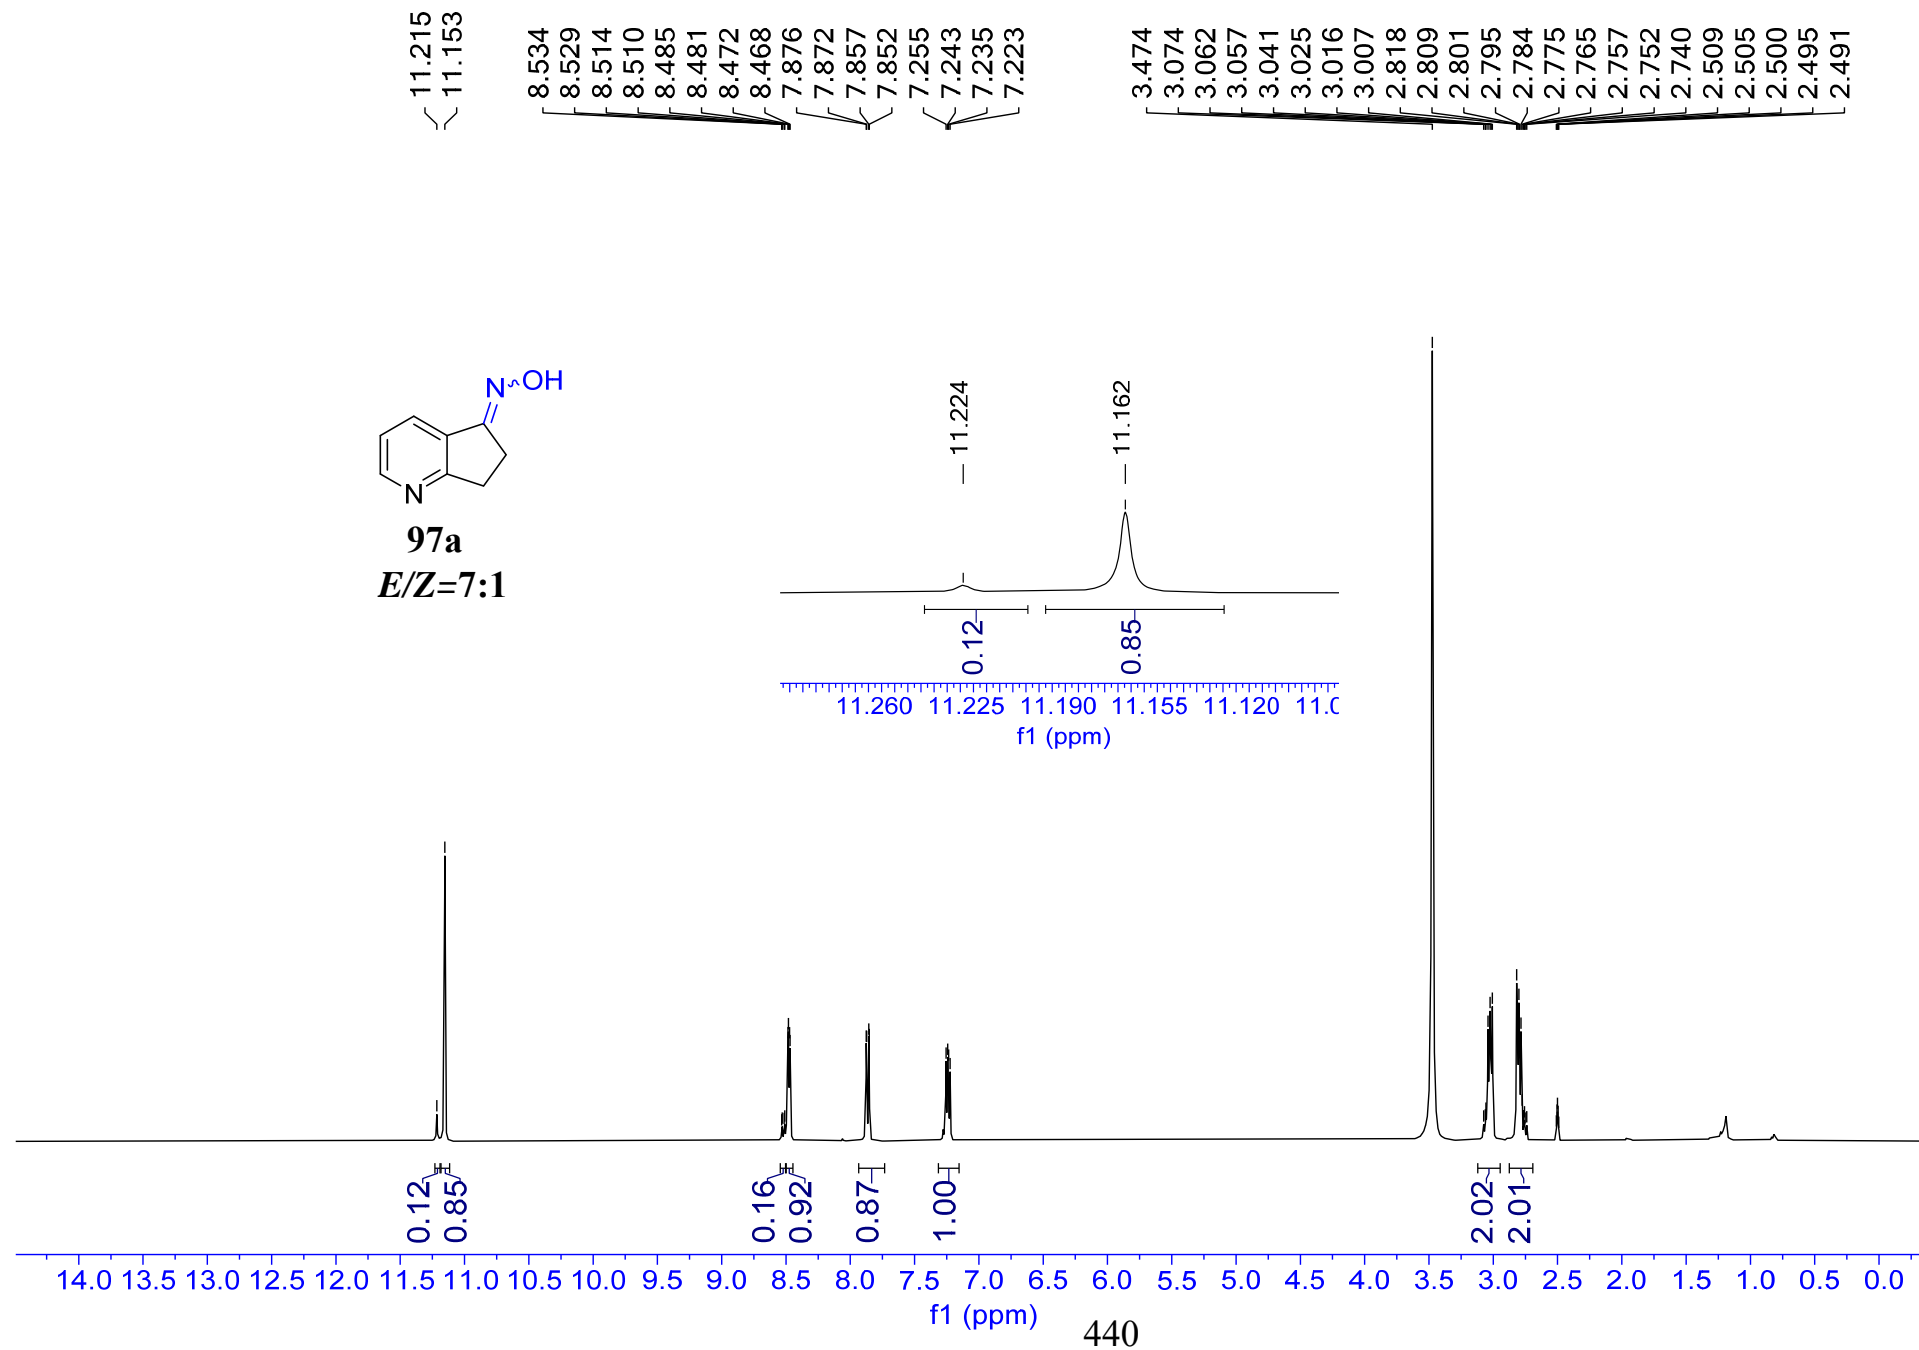

**$^{13}\text{C}$  NMR 101 MHz, DMSO- $d_6$**

167.97  
167.29

158.52  
155.35  
150.80  
150.60

135.68  
129.90  
128.19  
126.97  
121.85  
121.62

39.83  
39.62  
39.41  
39.20  
38.99  
38.78  
38.57  
30.21  
29.82  
25.84  
23.88

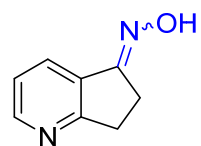

**97a**

***E/Z*=7:1**

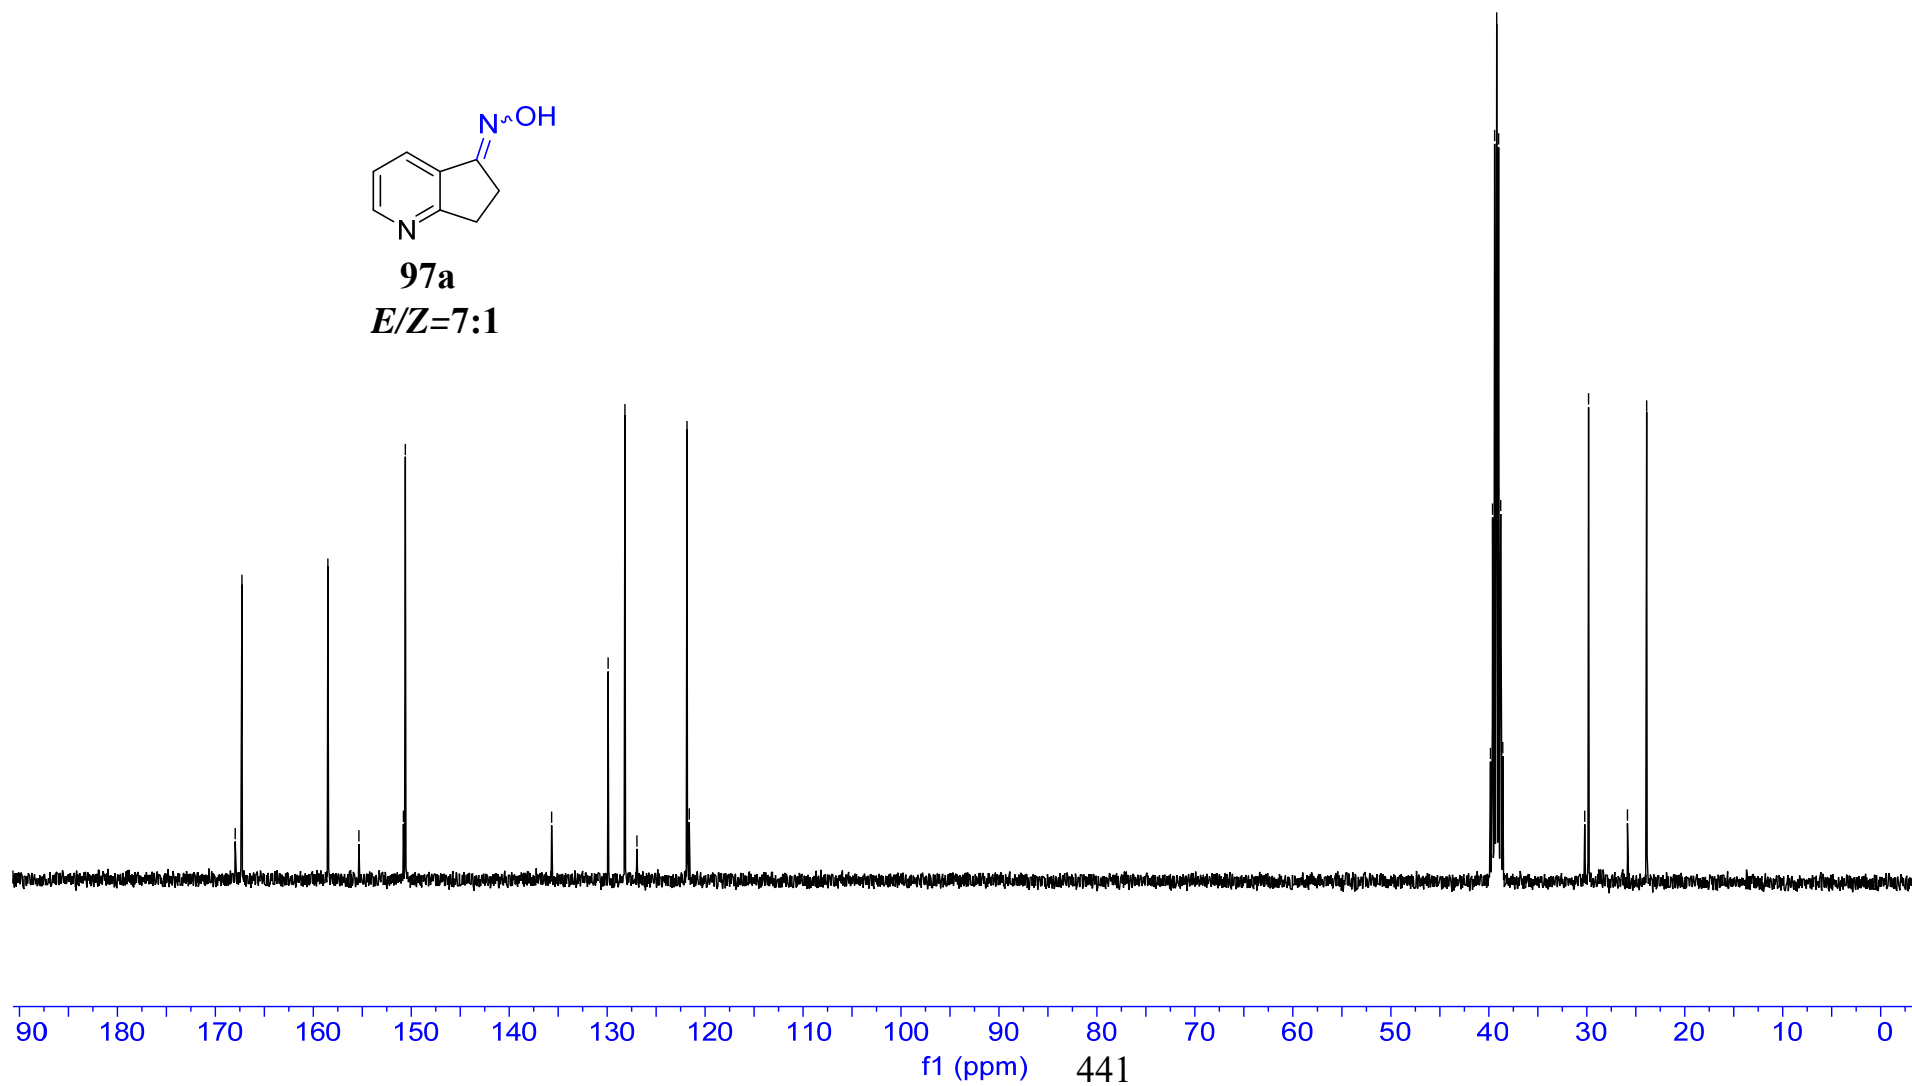

<sup>1</sup>H NMR, 400 MHz, DMSO-d<sub>6</sub>

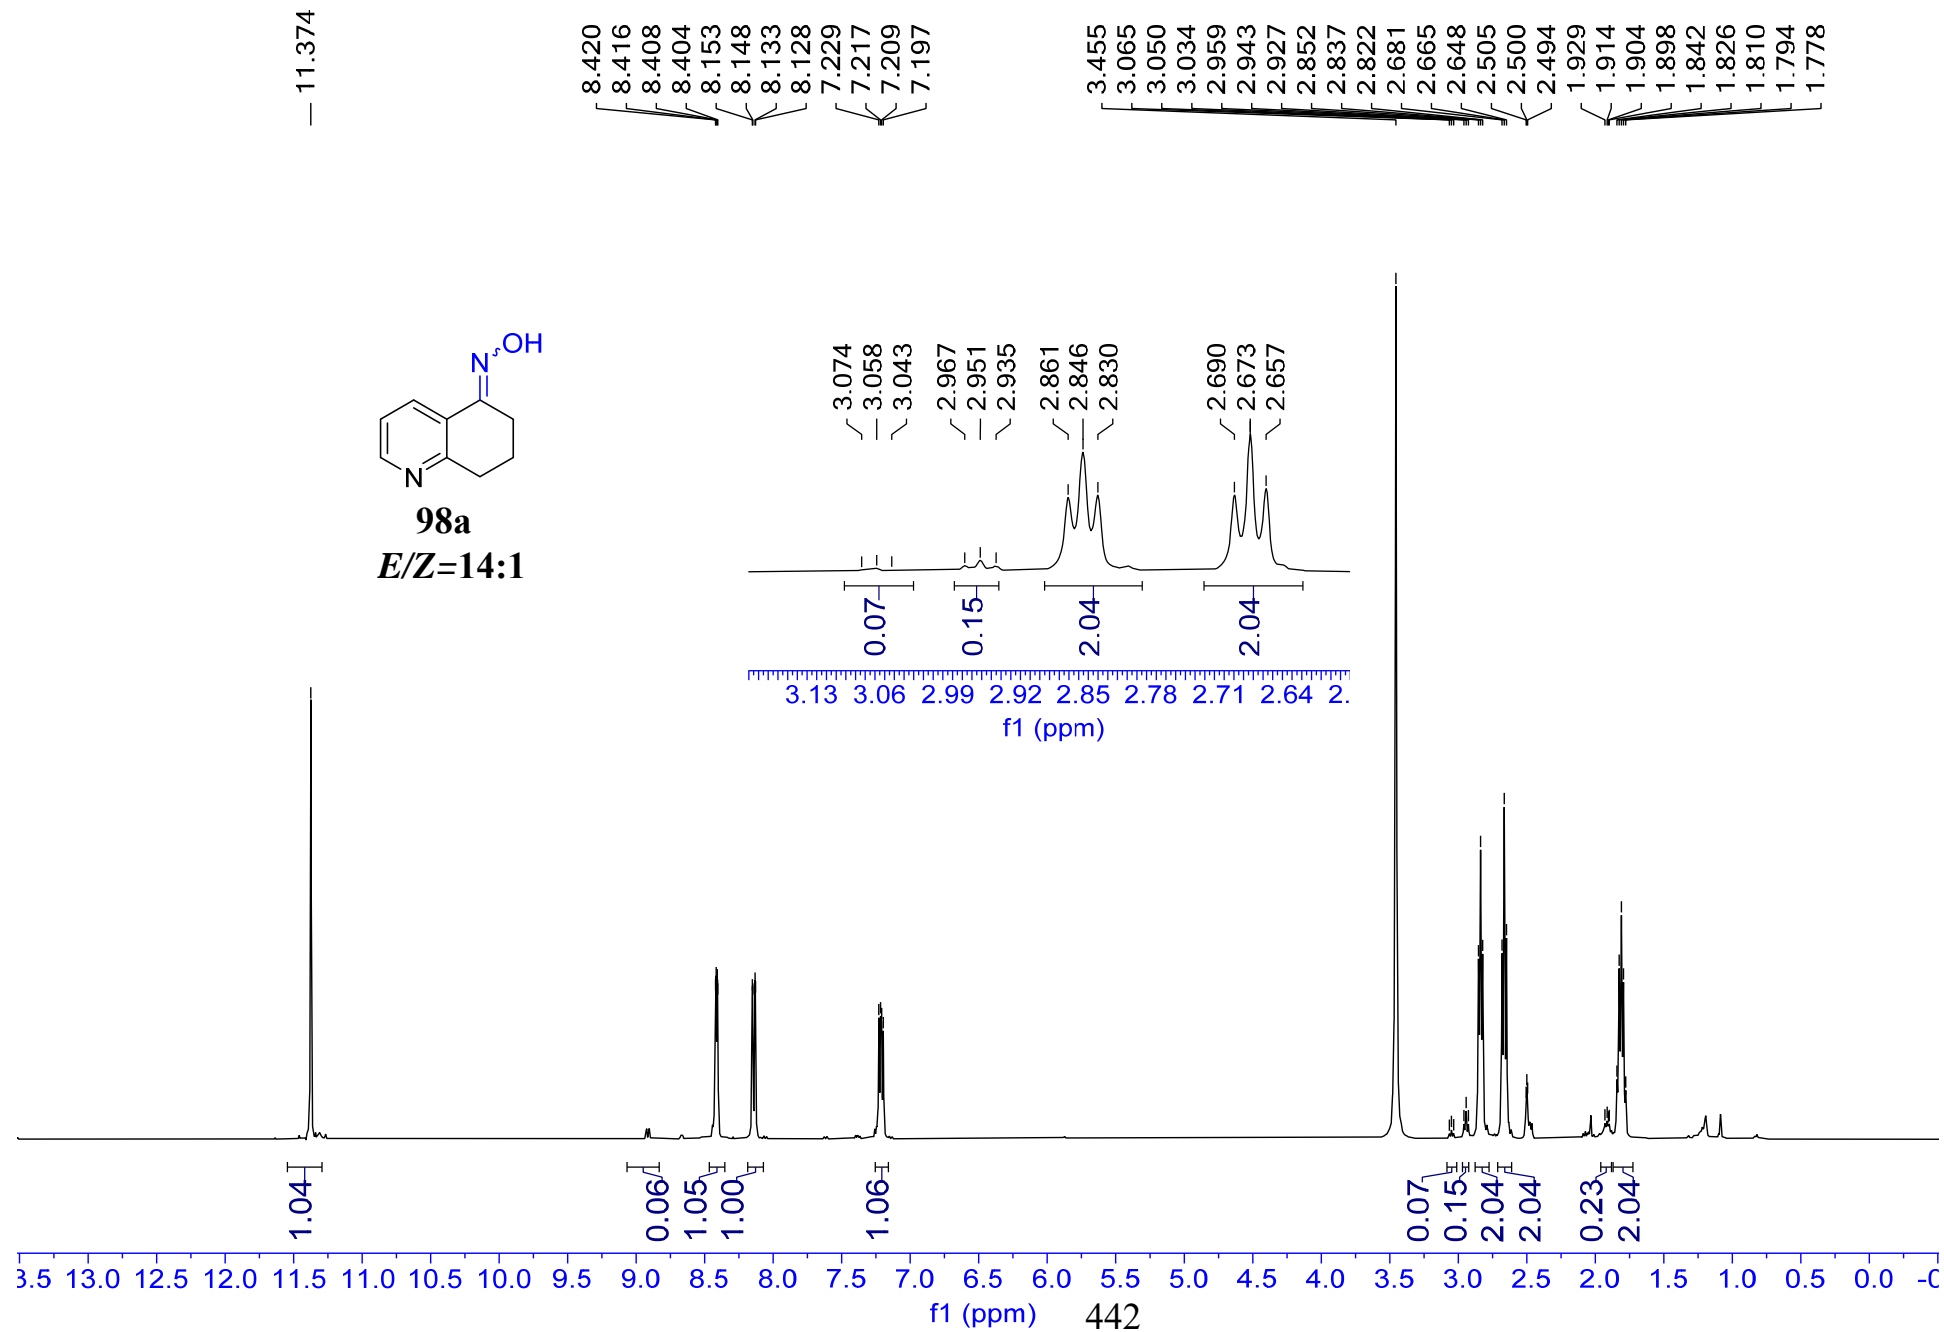

<sup>13</sup>C NMR 101 MHz, DMSO-d<sub>6</sub>

158.57  
157.59  
151.38  
148.98  
148.83  
147.75  
— 137.83  
130.56  
126.49  
123.80  
121.61  
120.67

39.83  
39.62  
39.41  
39.20  
38.99  
38.78  
38.57  
32.62  
31.82  
30.38  
22.60  
21.77  
20.12

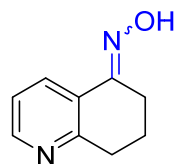

**98a**

***E/Z*=14:1**

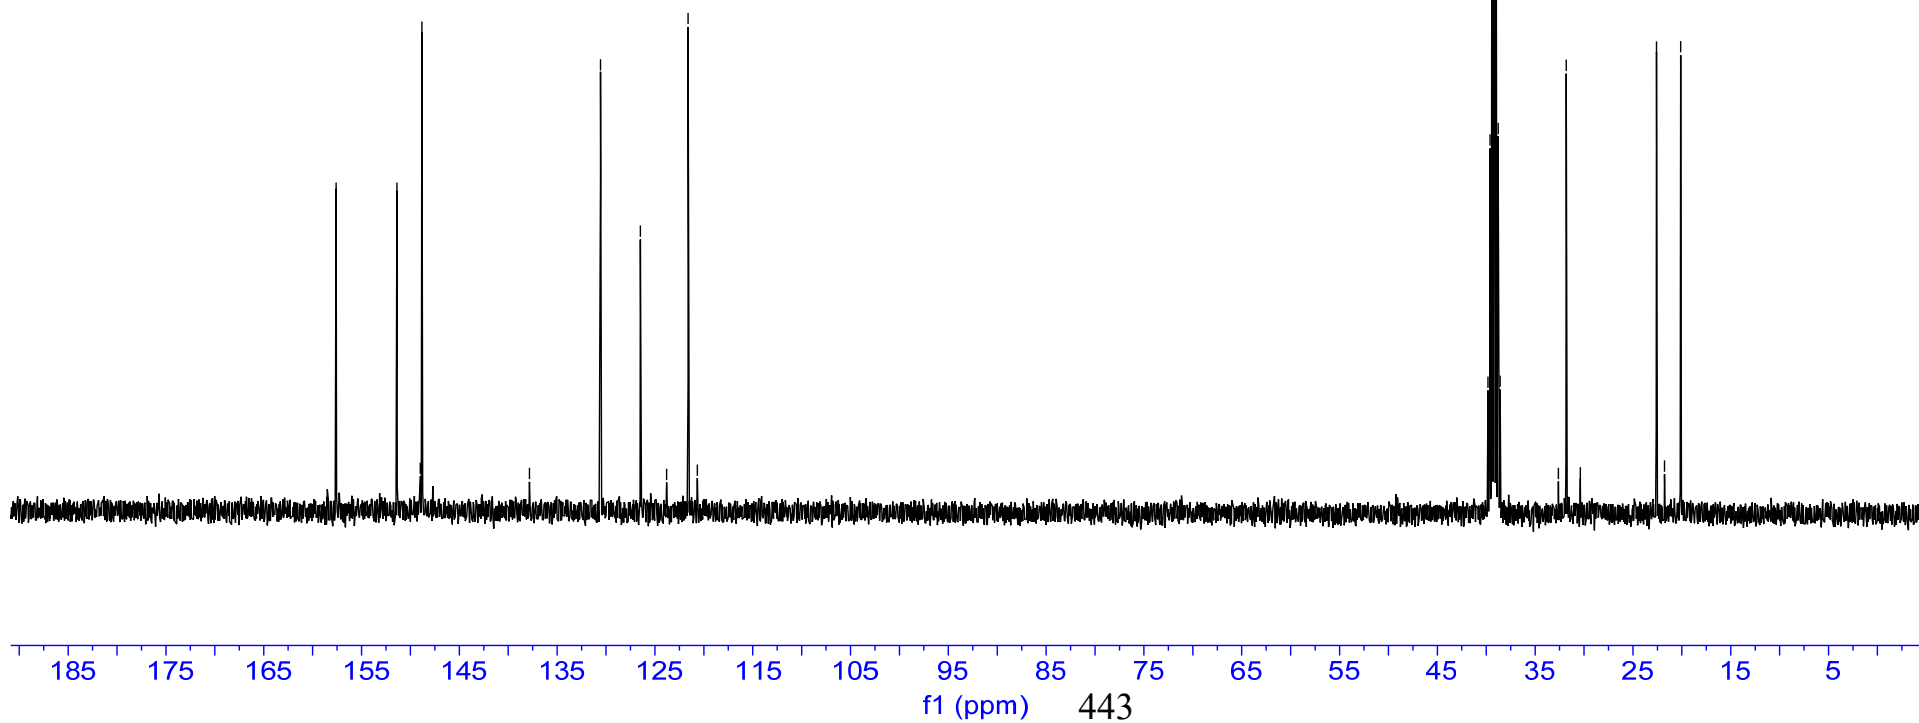

<sup>1</sup>H NMR, 400 MHz, DMSO-d<sub>6</sub>

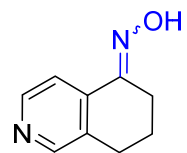

**99a**  
*E/Z*=7:3

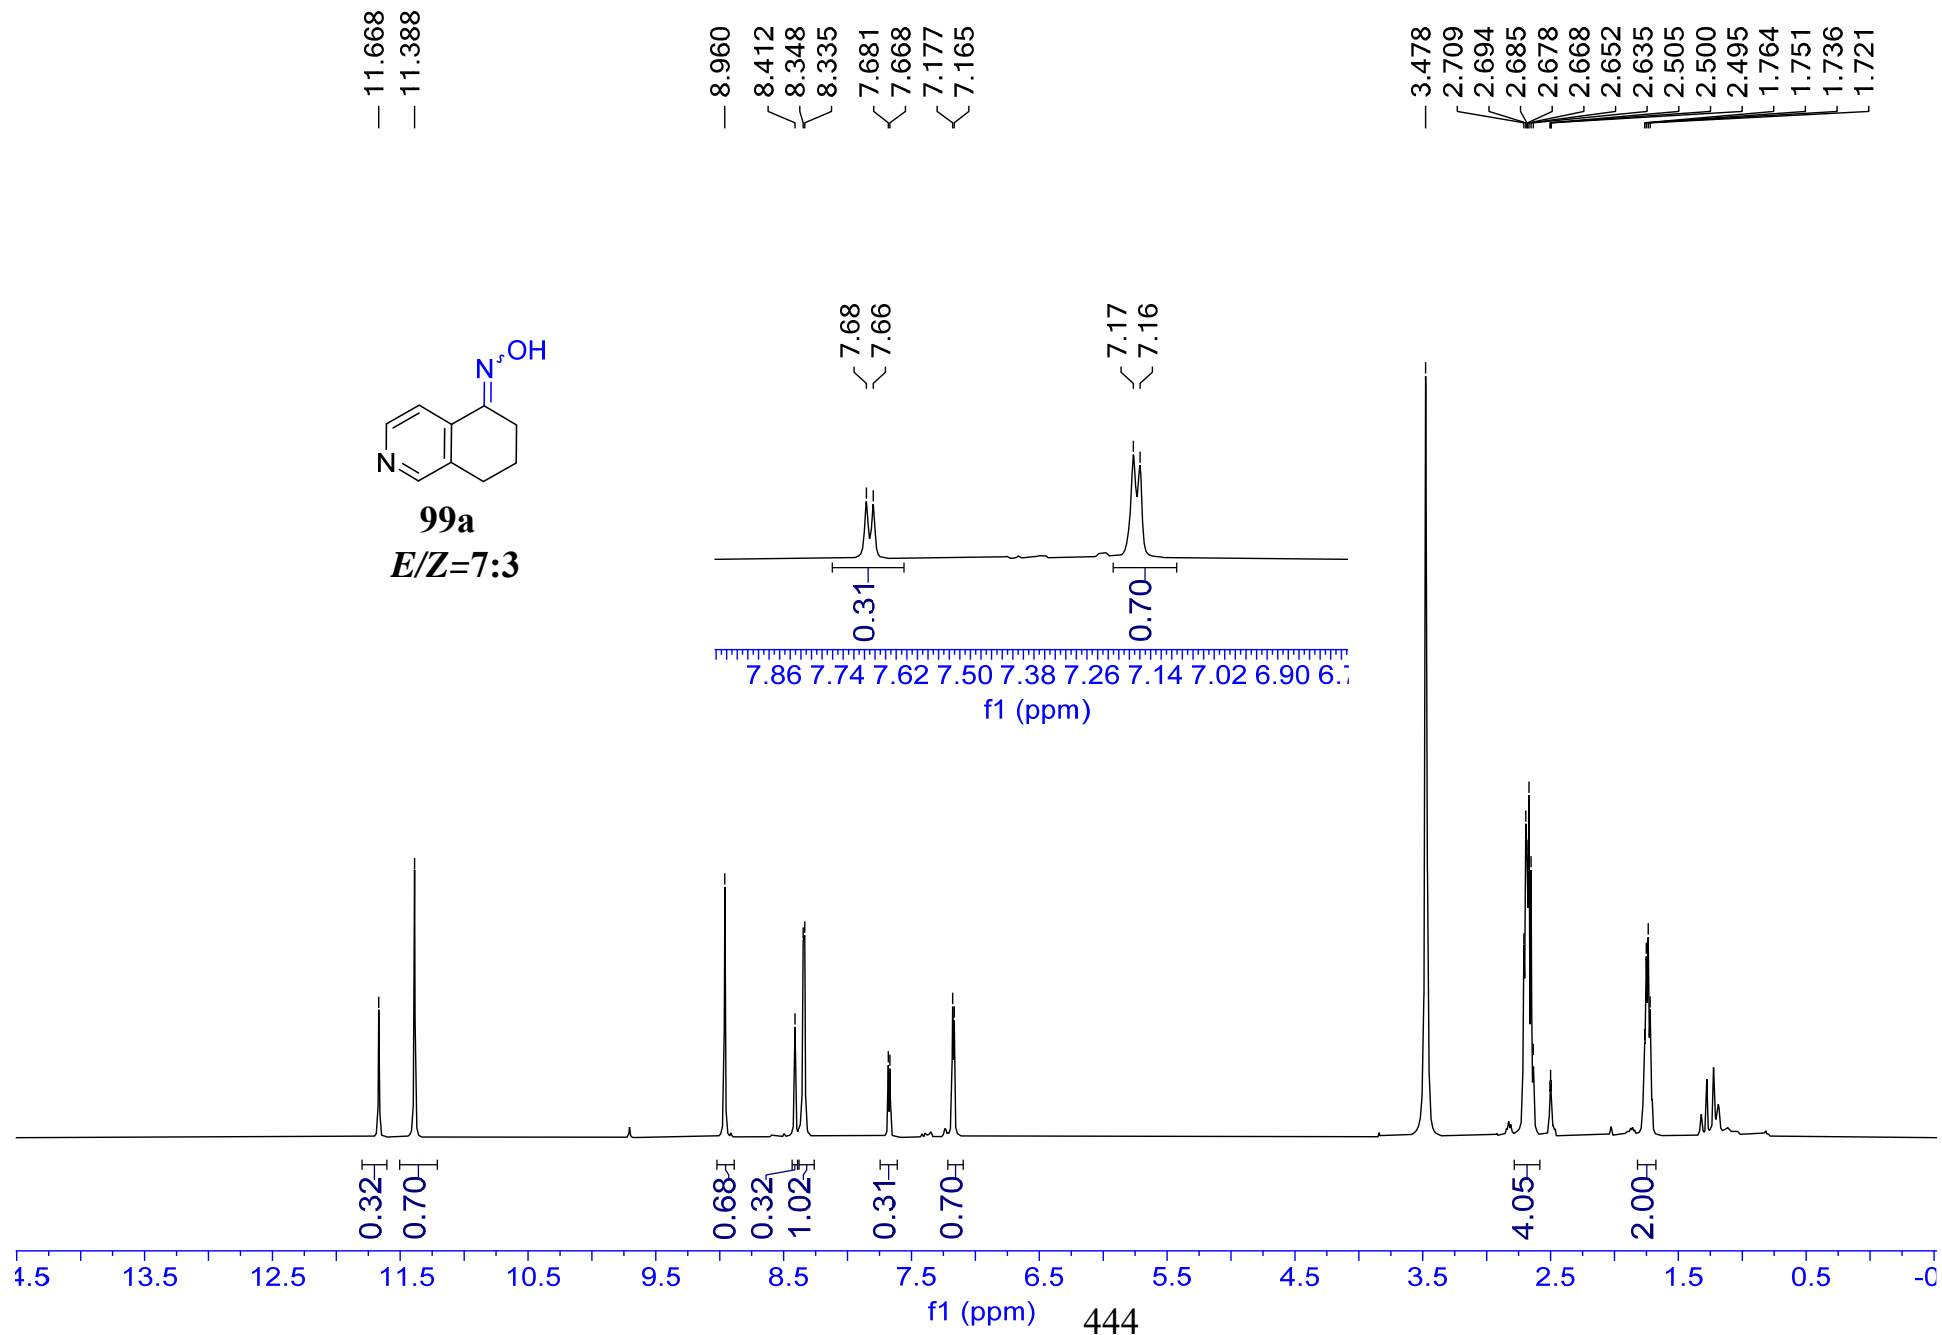



<sup>13</sup>C NMR 101 MHz, DMSO-d<sub>6</sub>

150.88  
150.71  
149.90  
148.09  
146.84  
146.79  
144.52  
138.01  
— 133.25  
— 127.11  
— 123.19  
— 116.46

39.83  
39.62  
39.41  
39.20  
38.99  
38.78  
38.57  
27.98  
25.48  
22.84  
20.31  
19.96

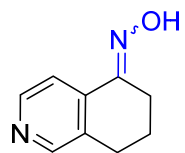

**99a**  
*E/Z*=7:3

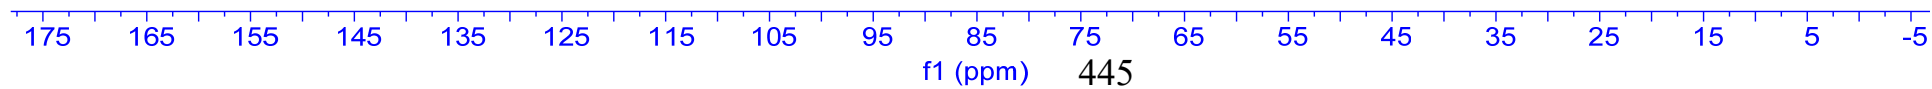

**<sup>1</sup>H NMR, 400 MHz, CDCl<sub>3</sub>**

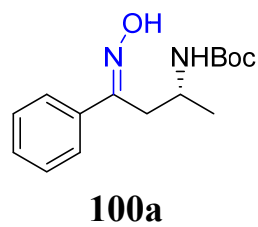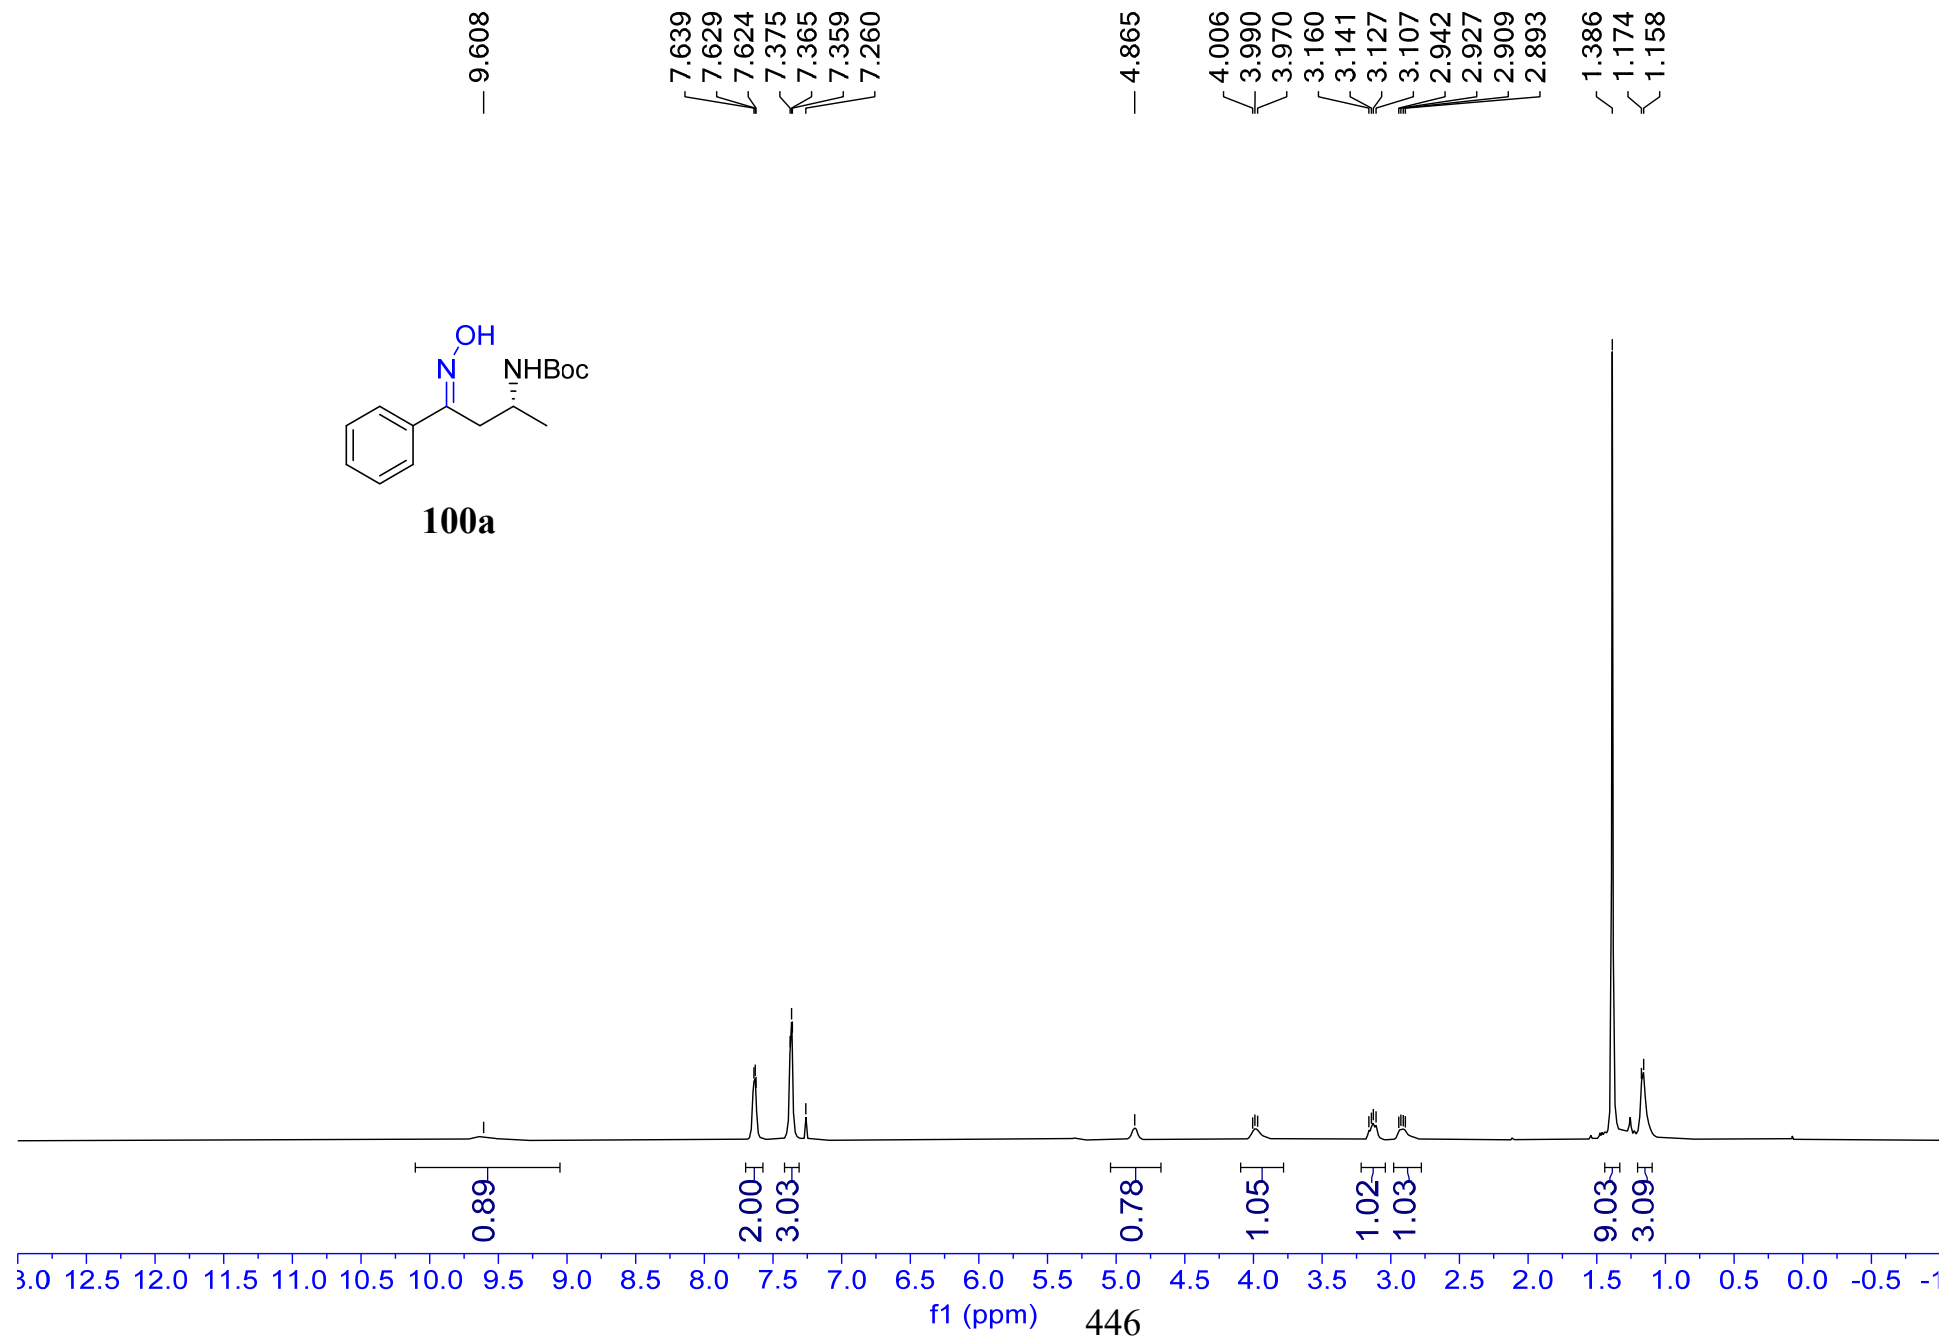

$^{13}\text{C}$  NMR 101 MHz,  $\text{CDCl}_3$

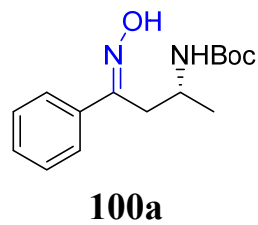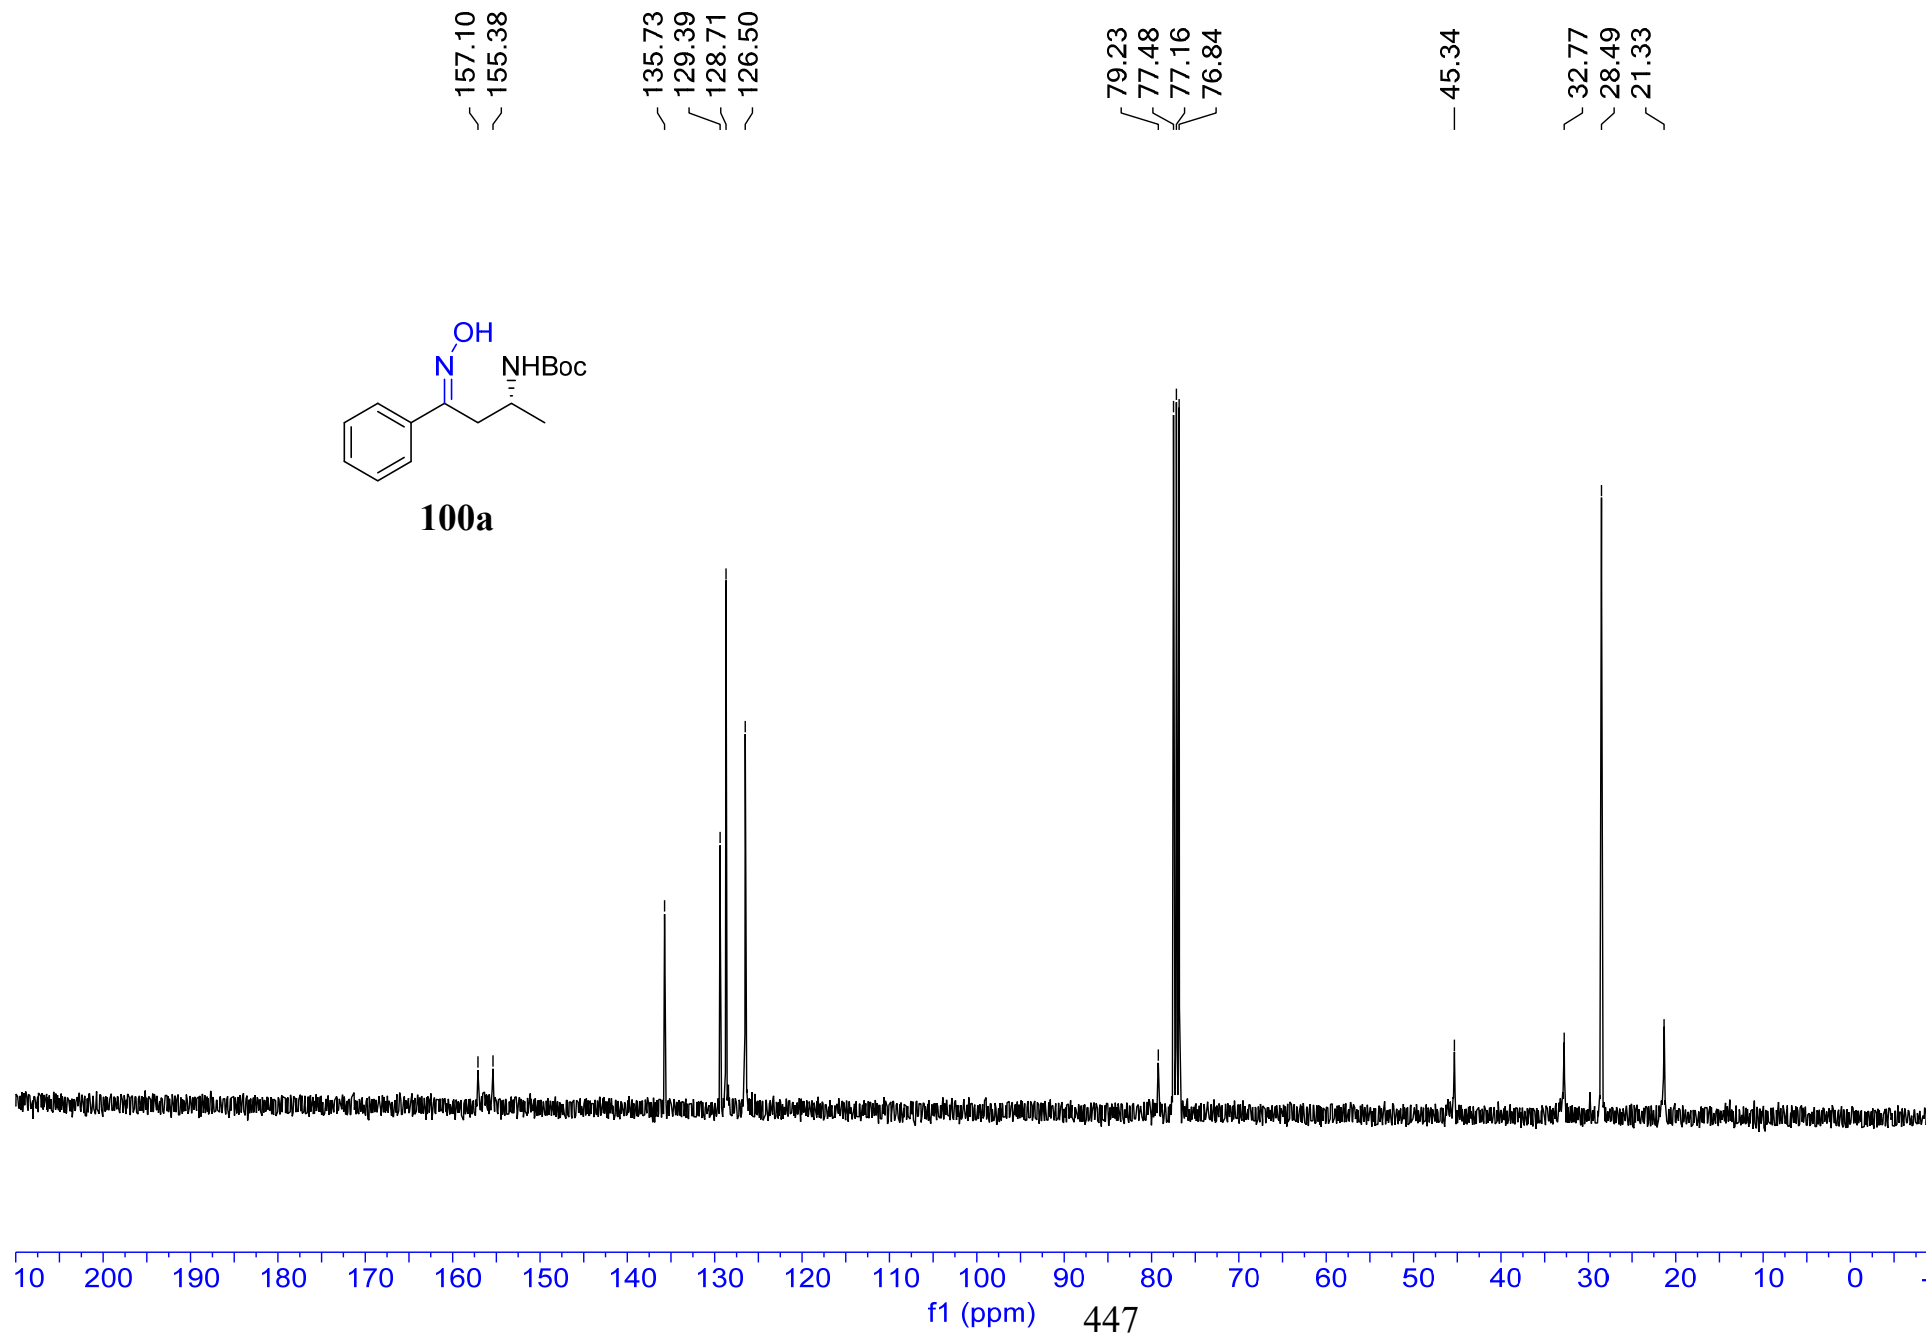

$^1\text{H}$  NMR, 400 MHz,  $\text{CDCl}_3$

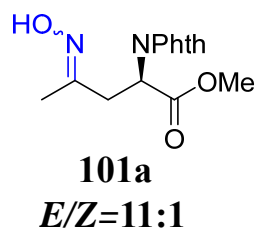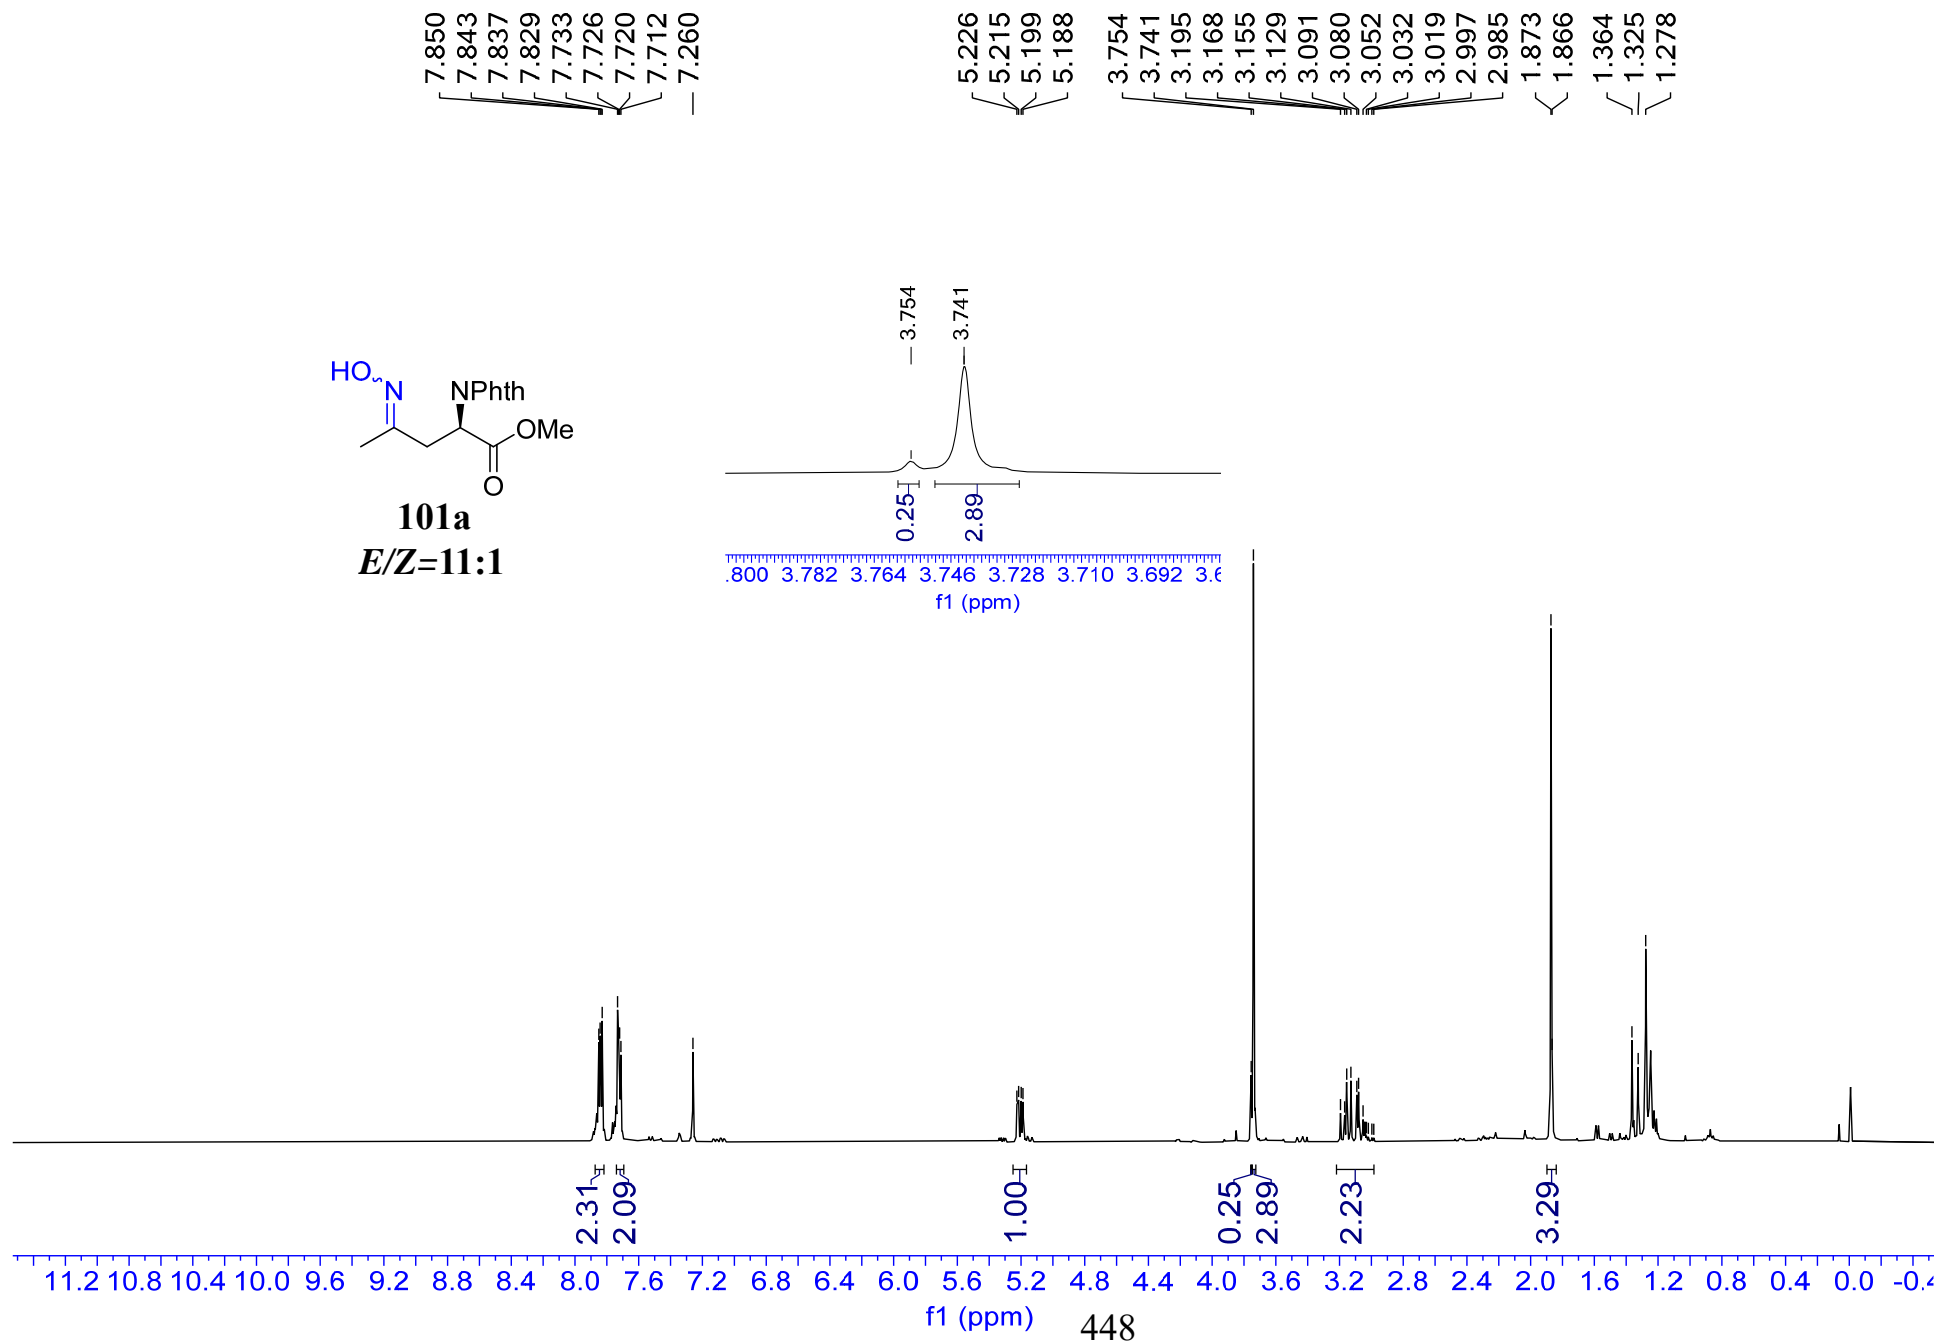

<sup>13</sup>C NMR 101 MHz, CDCl<sub>3</sub>

~ 169.32  
~ 167.55

— 154.36

~ 134.32  
~ 131.88

— 123.75

77.48  
77.16  
76.84

— 53.16  
— 49.10

— 34.97

— 13.79

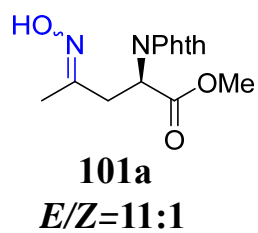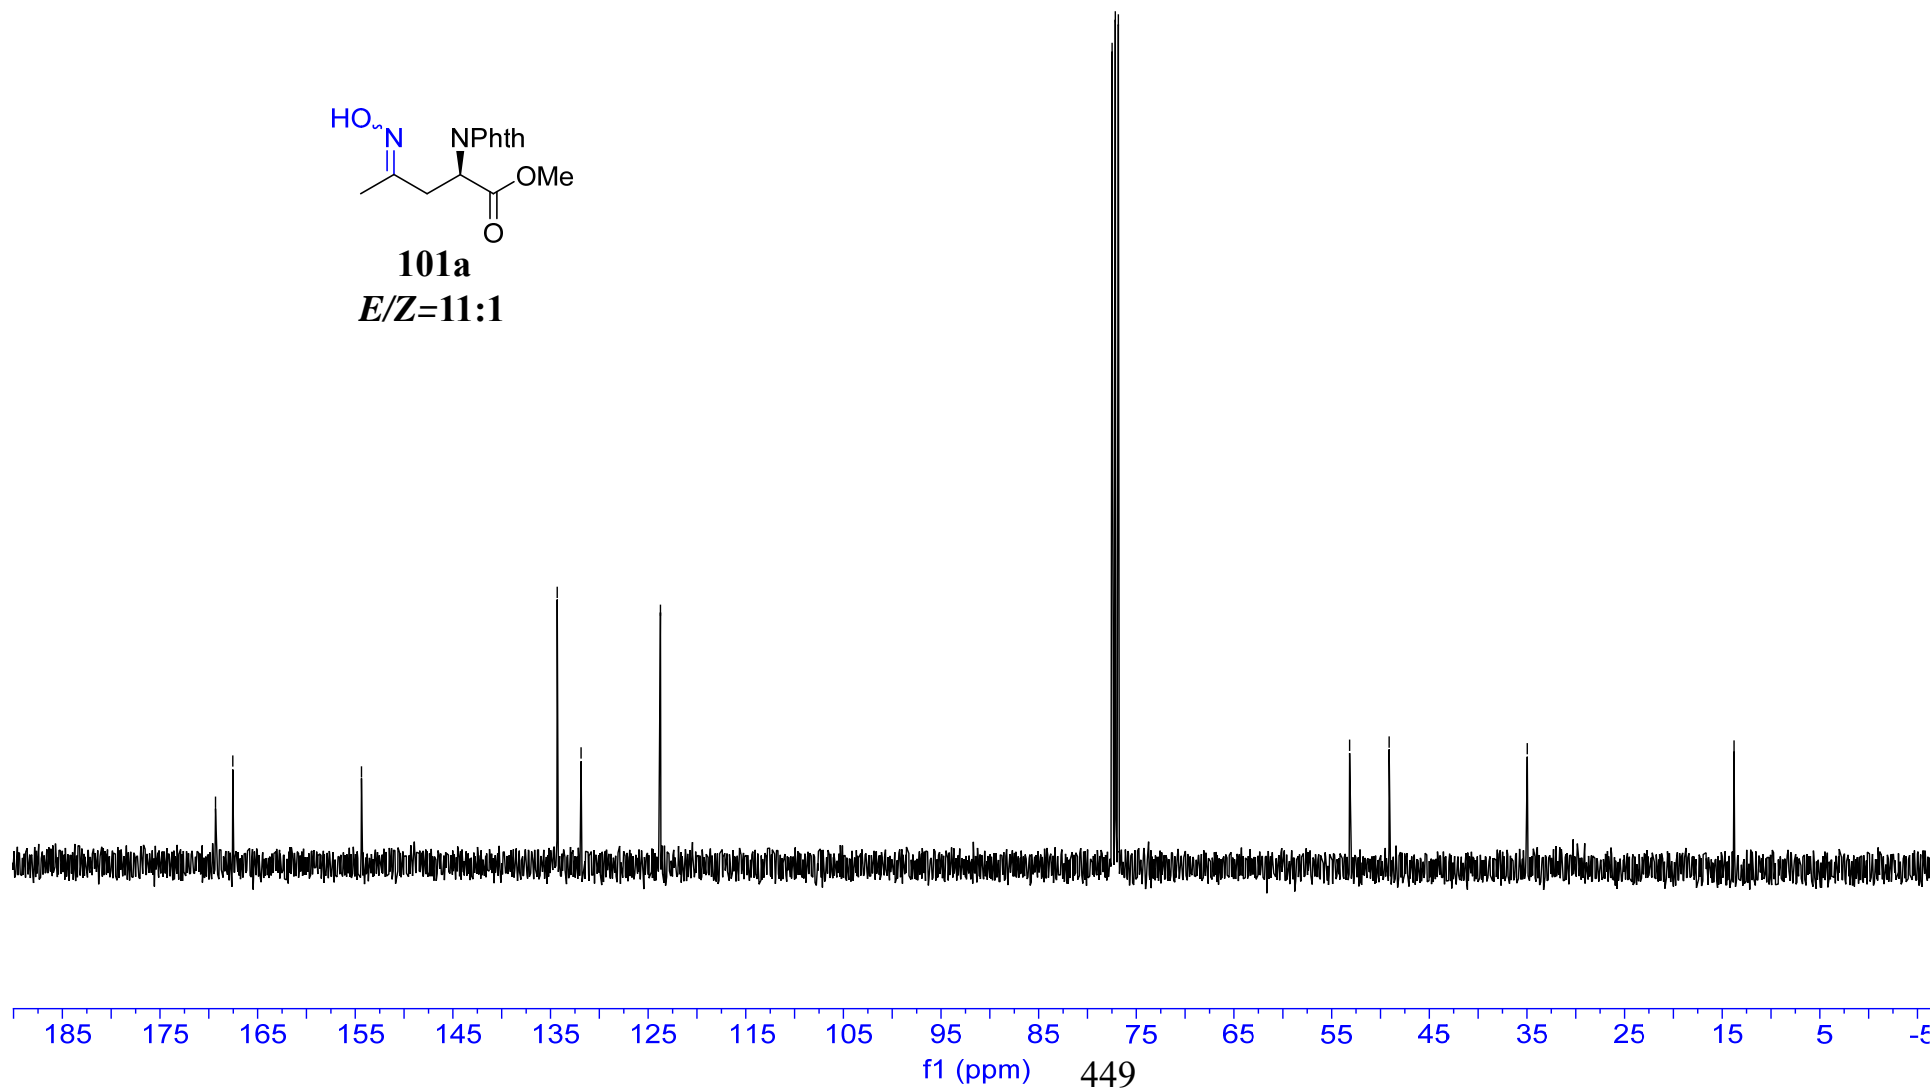

<sup>1</sup>H NMR, 400 MHz, CDCl<sub>3</sub>

8.606  
7.852  
7.847  
7.845  
7.839  
7.831  
7.731  
7.723  
7.717  
7.714  
7.710  
— 7.260

4.880  
4.866  
4.855  
4.841

3.713  
3.706

2.476  
2.460  
2.443  
2.443  
2.437  
2.427  
2.422  
2.403  
2.270  
2.260  
2.253  
2.240  
2.222  
2.208  
2.204  
2.192  
2.186  
2.171  
1.810  
1.703

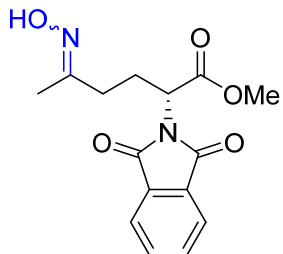

**102a**  
*E/Z*=3:1

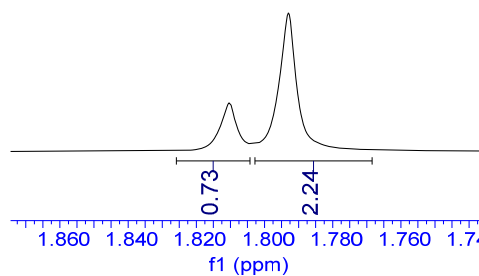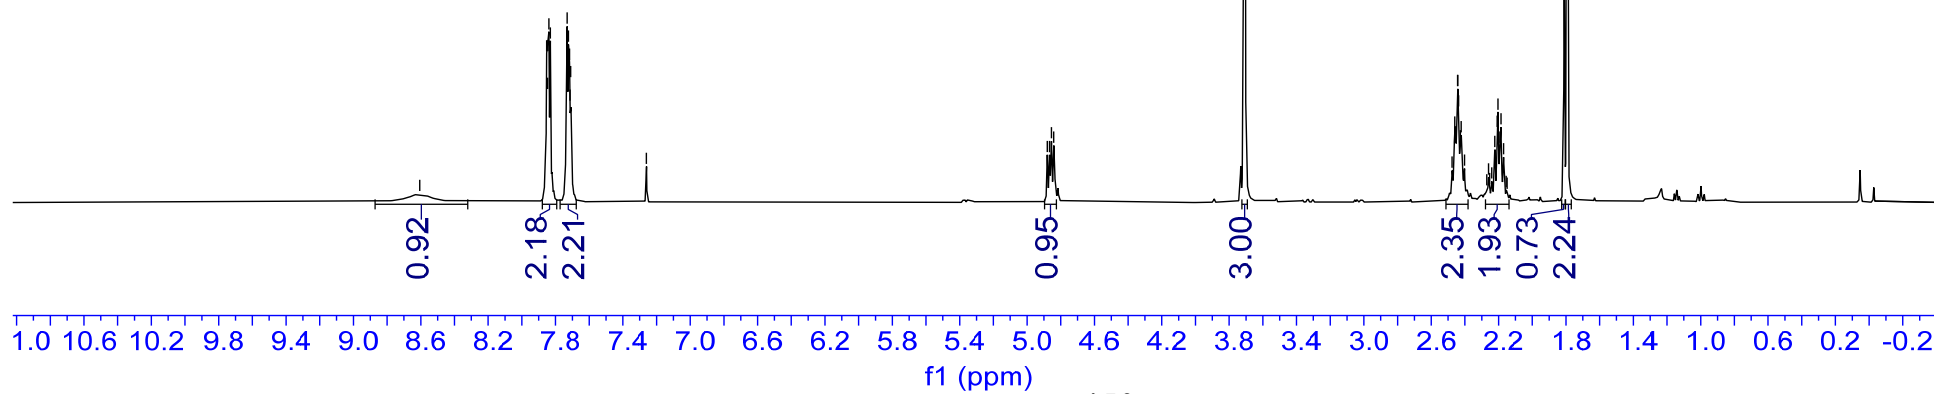

<sup>13</sup>C NMR 101 MHz, CDCl<sub>3</sub>

169.62  
169.56  
167.80  
167.76

156.64

134.33  
131.84

123.70

77.48  
77.16  
76.84

52.93  
52.91  
52.05  
51.60

32.64

25.51  
25.35  
24.71  
19.79  
13.58

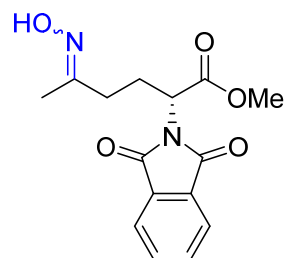

**102a**  
*E/Z*=3:1

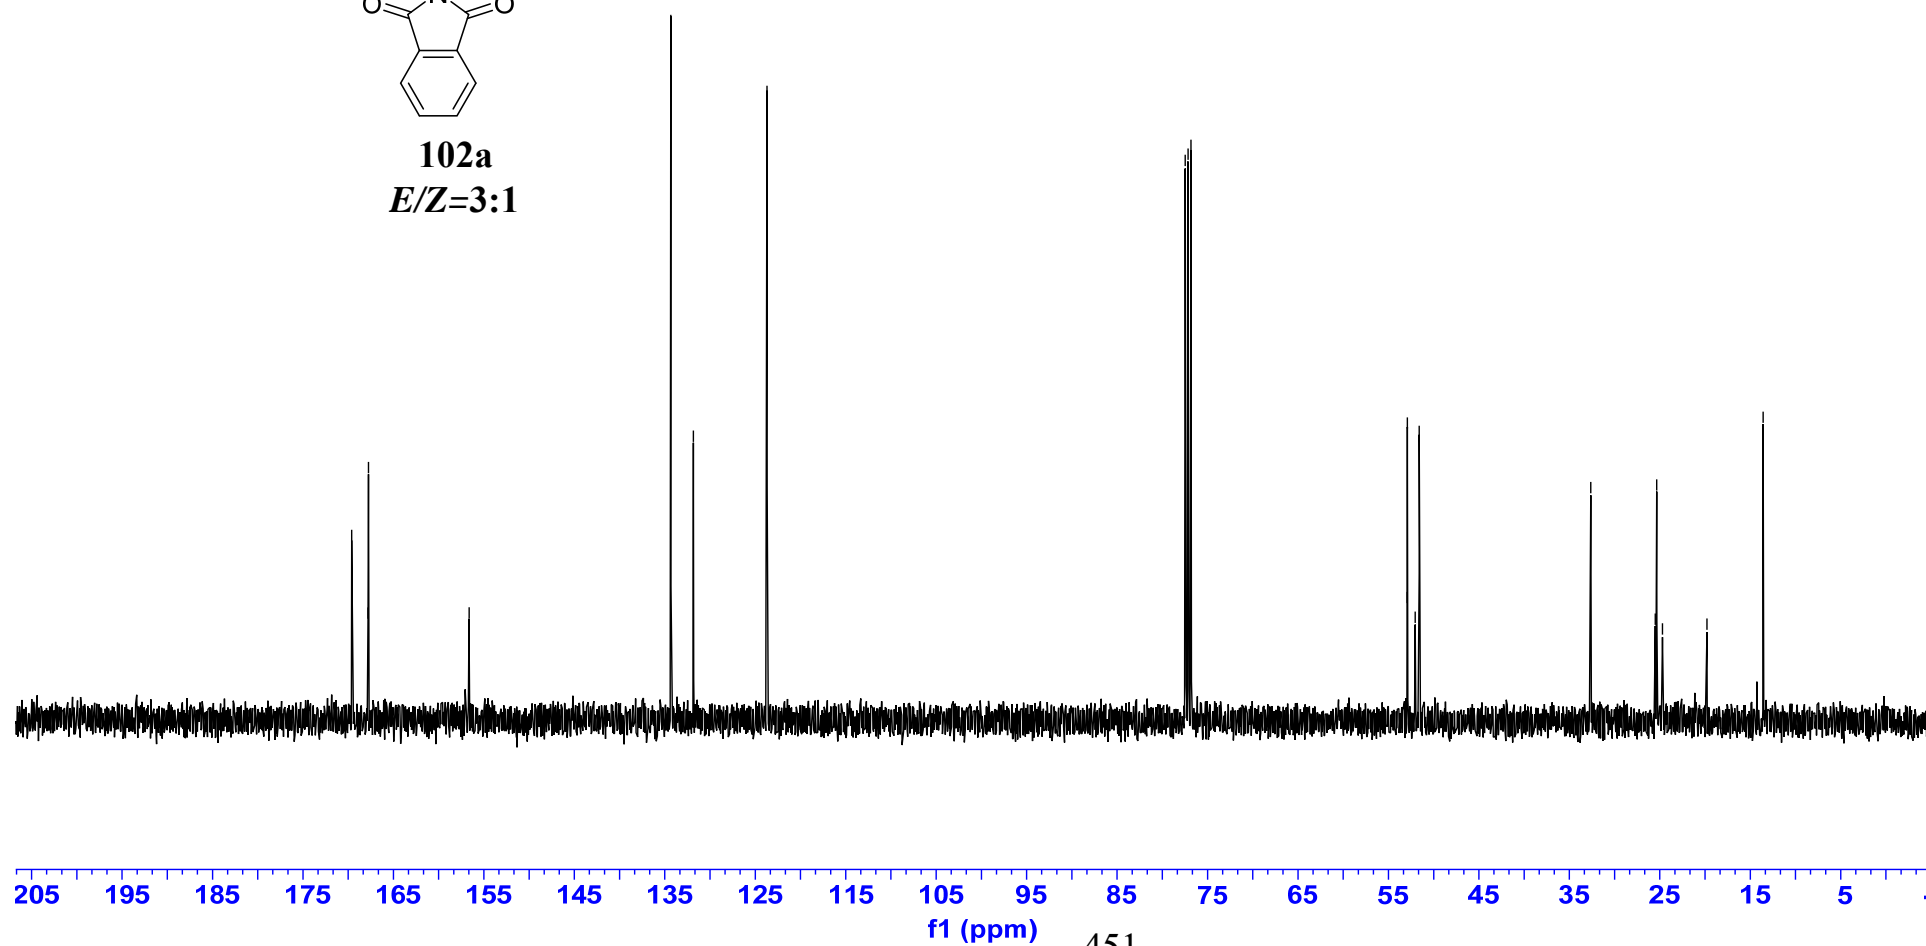

$^1\text{H}$  NMR, 400 MHz,  $\text{CDCl}_3$

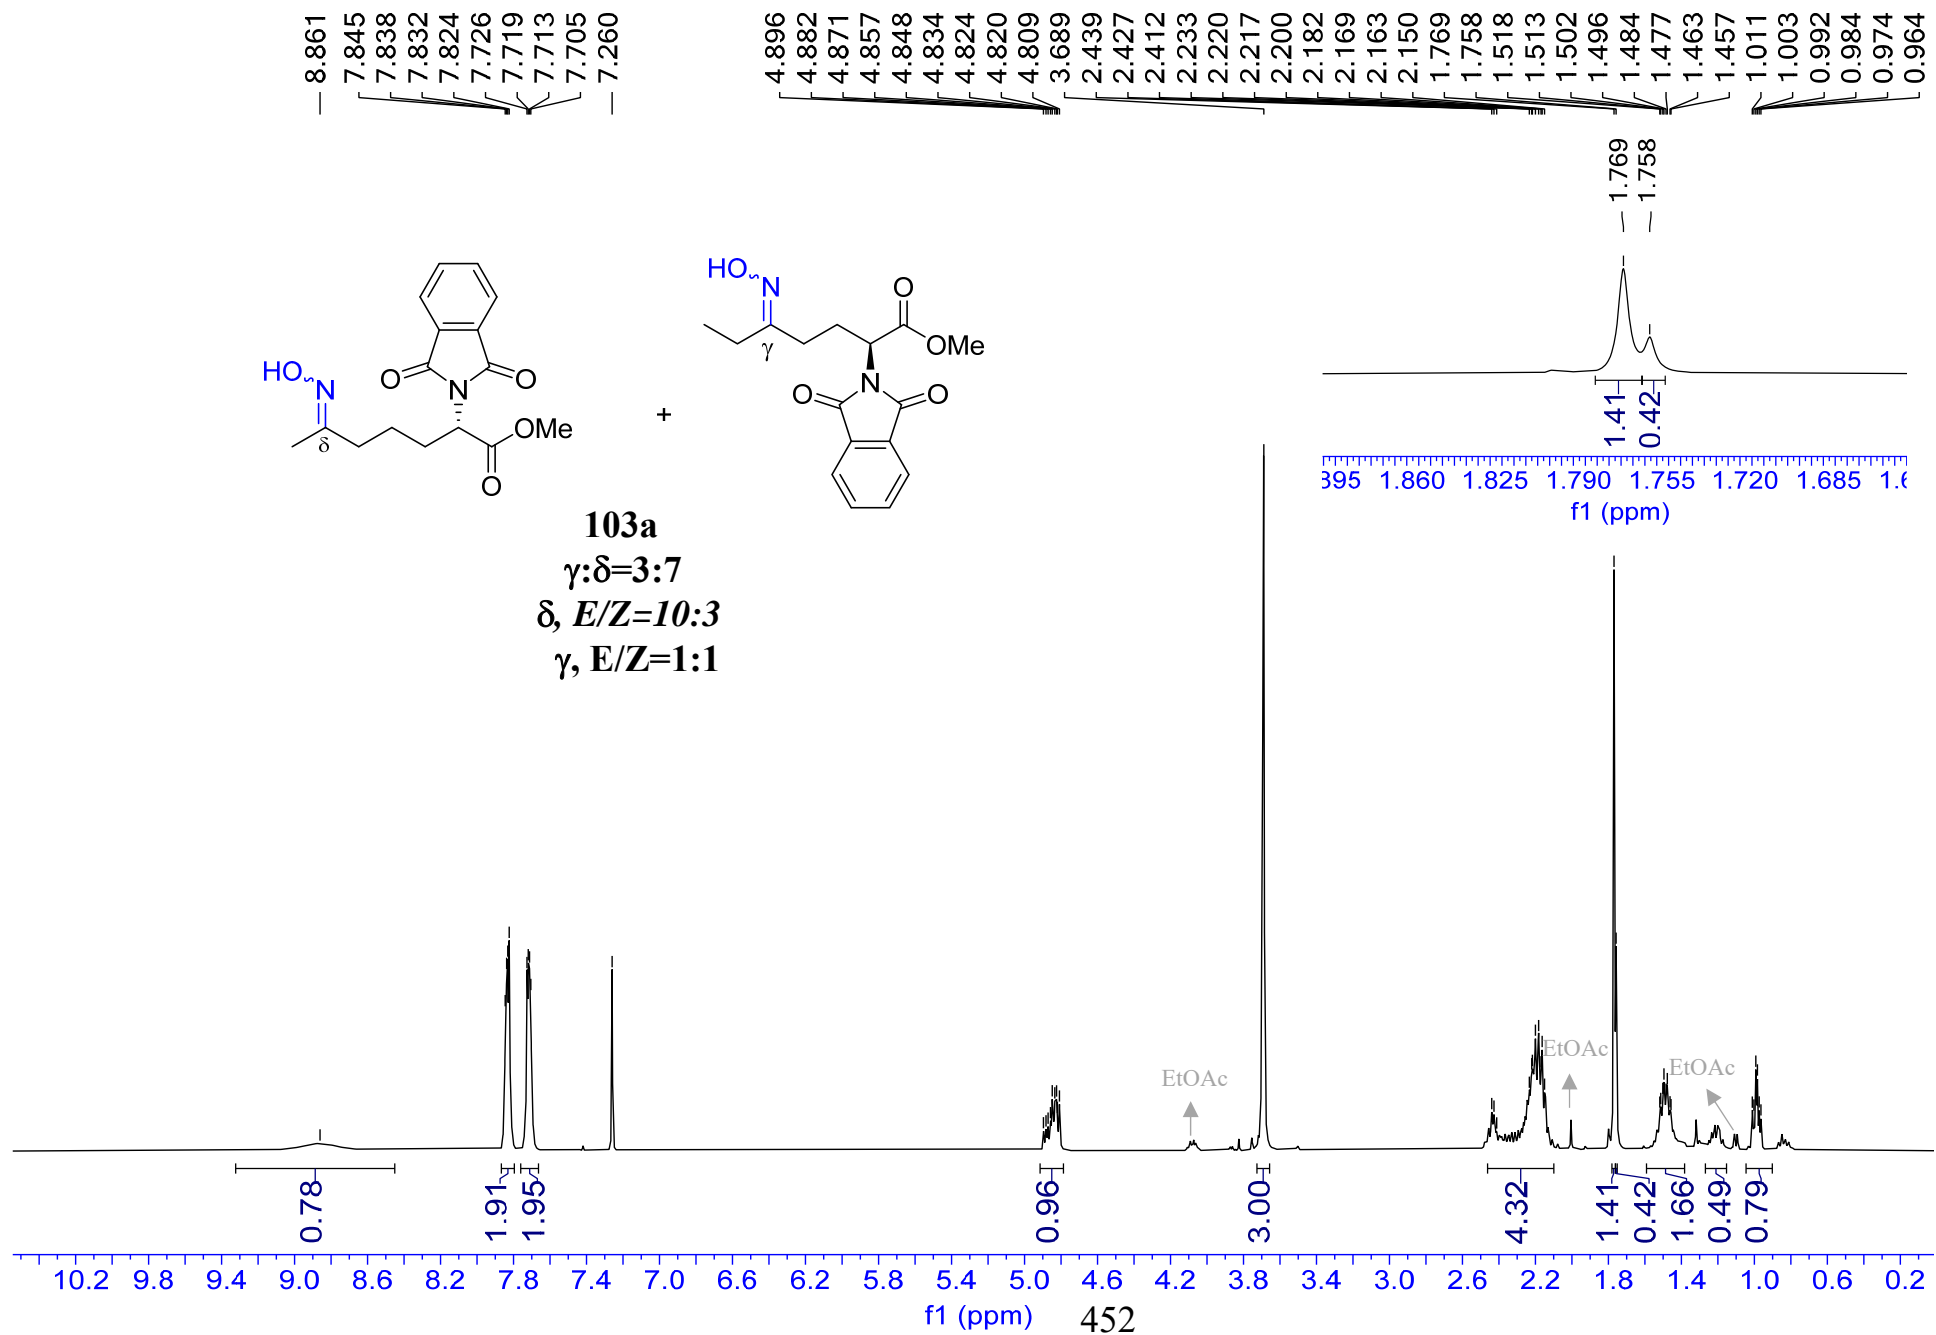



<sup>13</sup>C NMR 101 MHz, CDCl<sub>3</sub>

169.76  
169.70  
169.62  
169.54  
167.74  
167.72  
160.81  
160.79  
157.87  
157.59

134.30  
134.28  
131.82  
131.78  
123.65  
123.62

77.48  
77.16  
76.84

52.85  
52.83  
52.79  
52.17  
51.82  
51.79  
51.65

35.02  
28.63  
28.31  
27.78  
27.42  
24.87  
24.51  
23.04  
22.26  
20.92  
19.80  
13.42  
10.66  
4.00

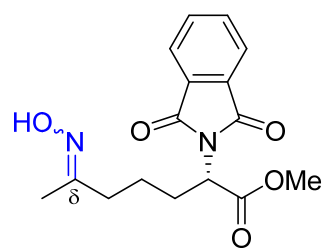

+

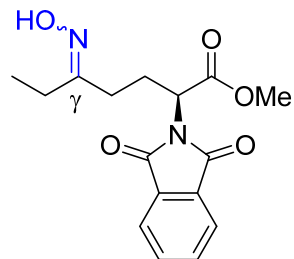

**103a**

$\gamma:\delta=3:7$

$\delta, E/Z=10:3$

$\gamma, E/Z=1:1$

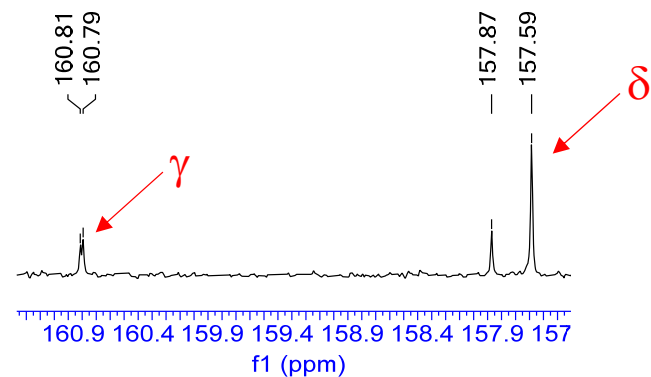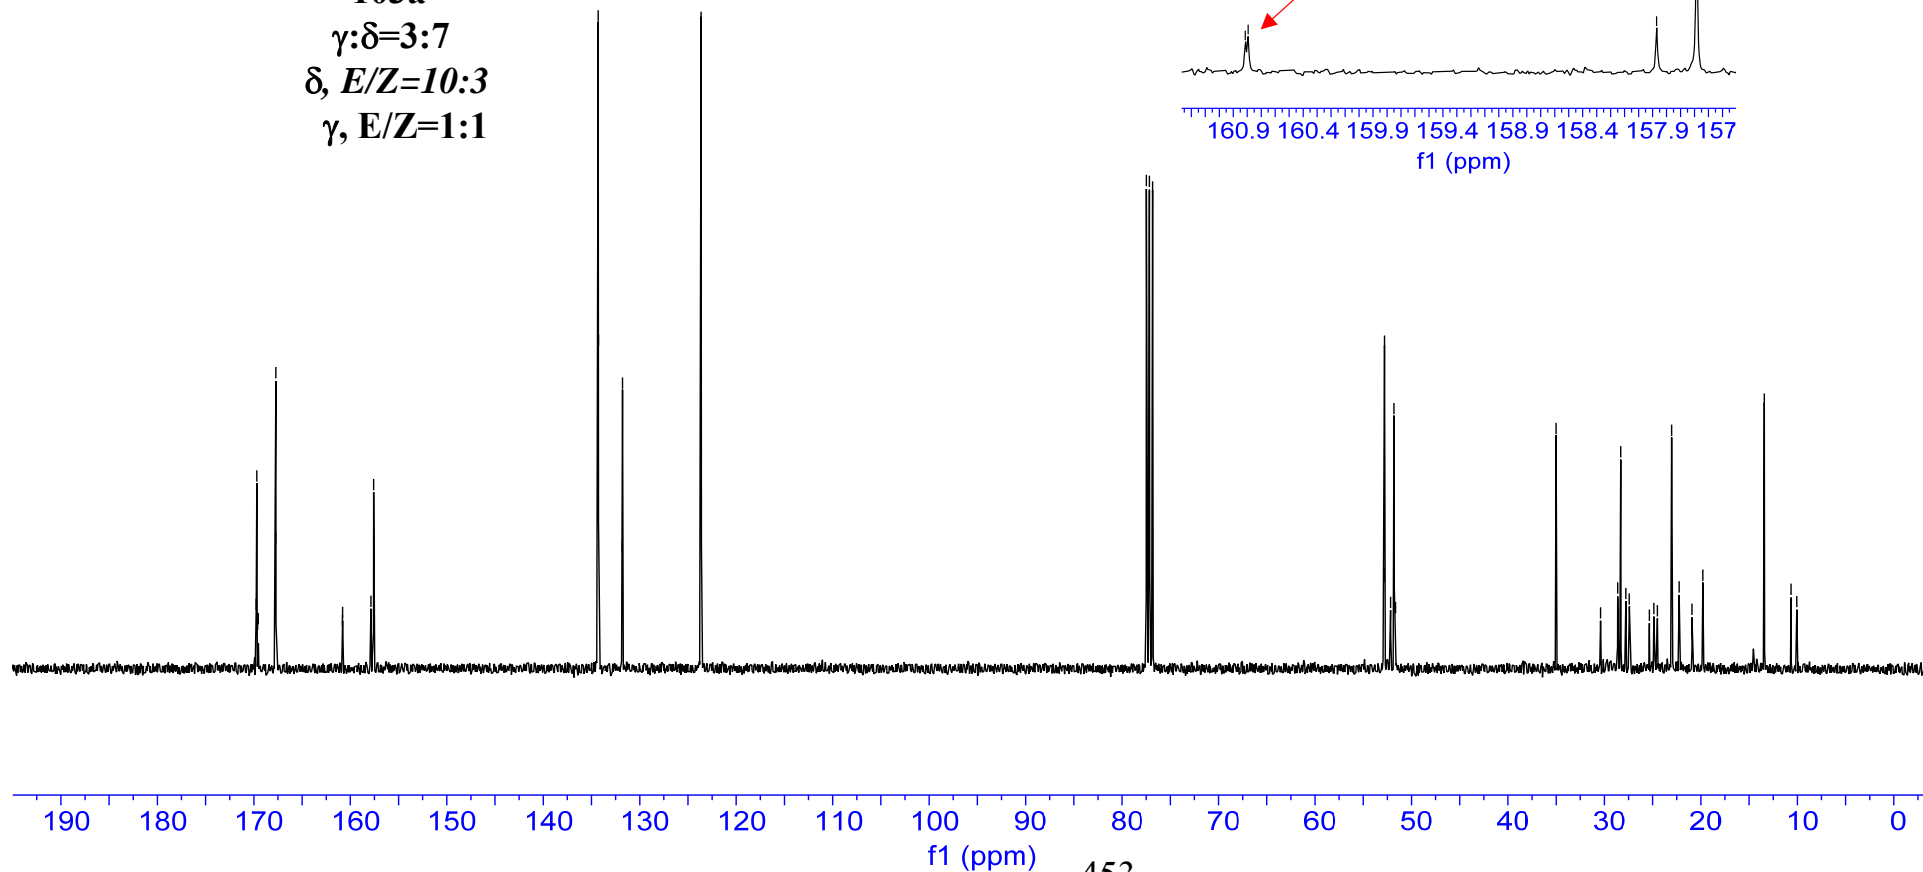

<sup>1</sup>H NMR, 400 MHz, CDCl<sub>3</sub>

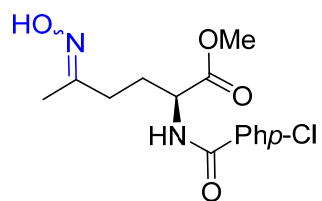

**104a**  
*E/Z*=3:1

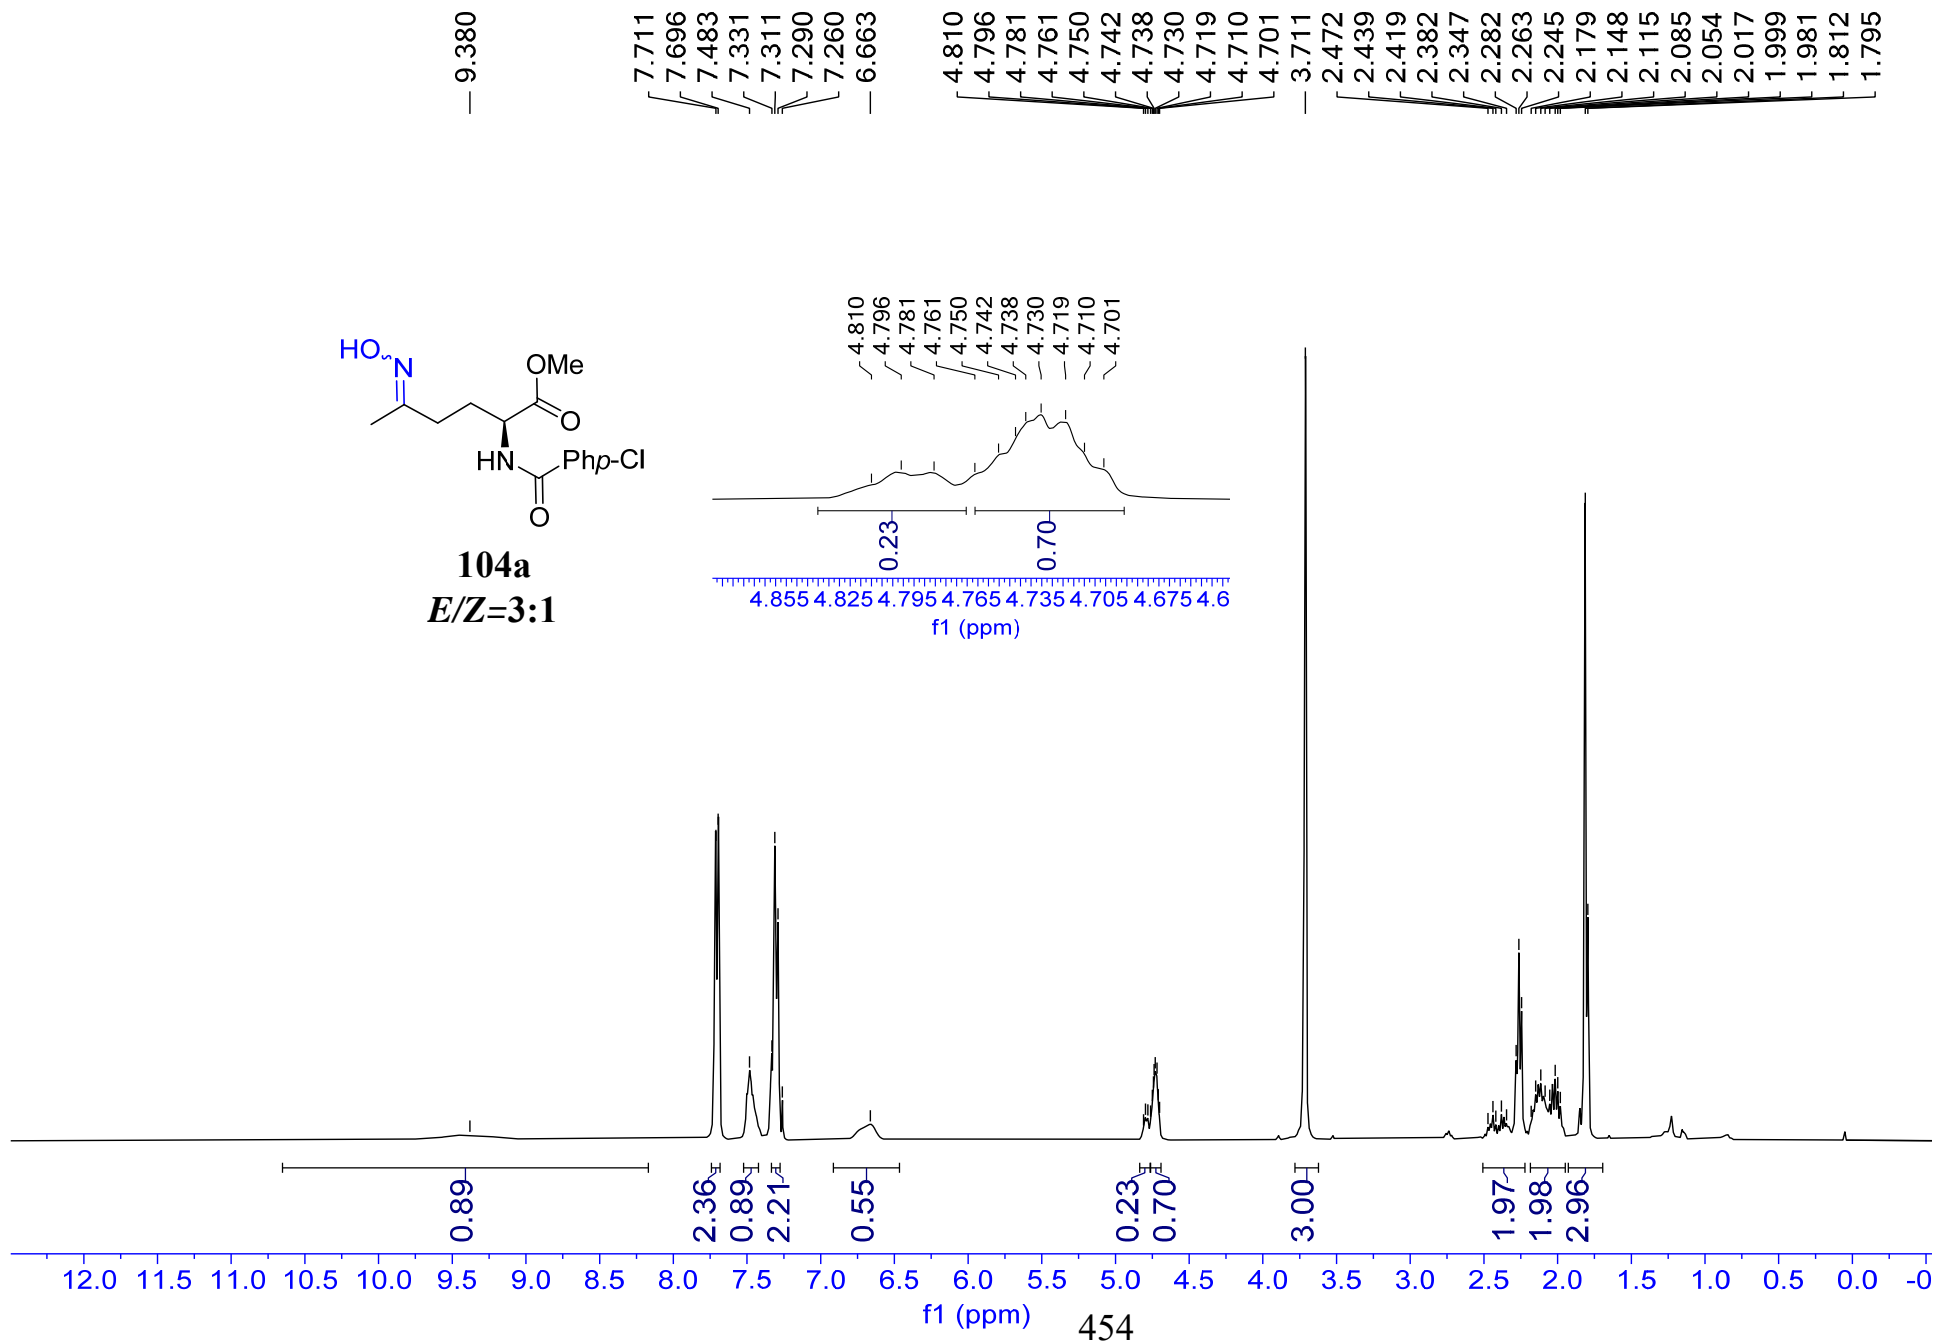

<sup>13</sup>C NMR 101 MHz, CDCl<sub>3</sub>

172.93  
172.57  
169.21  
166.63  
157.76  
157.49  
138.28  
138.02  
132.15  
132.00  
131.59  
129.00  
128.79  
128.75

77.48  
77.16  
76.84

52.71  
52.63  
52.37

32.04  
28.09  
27.44  
24.68  
19.82  
13.96

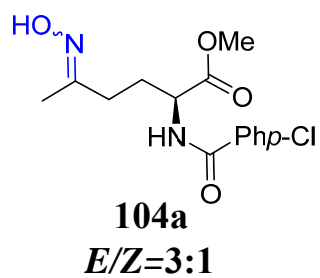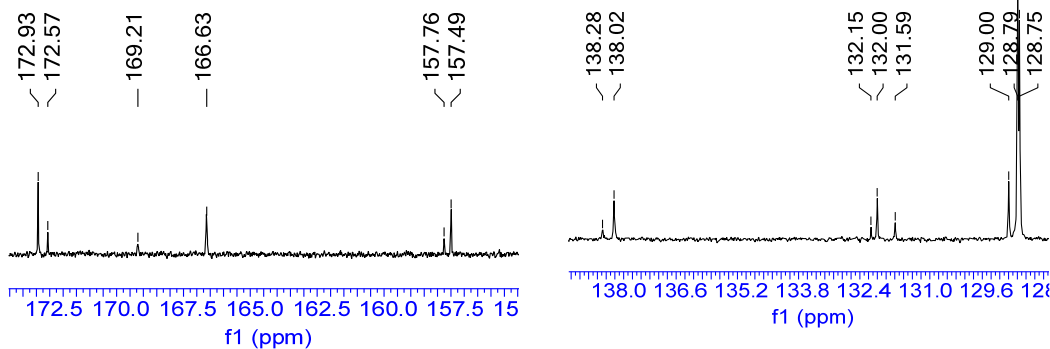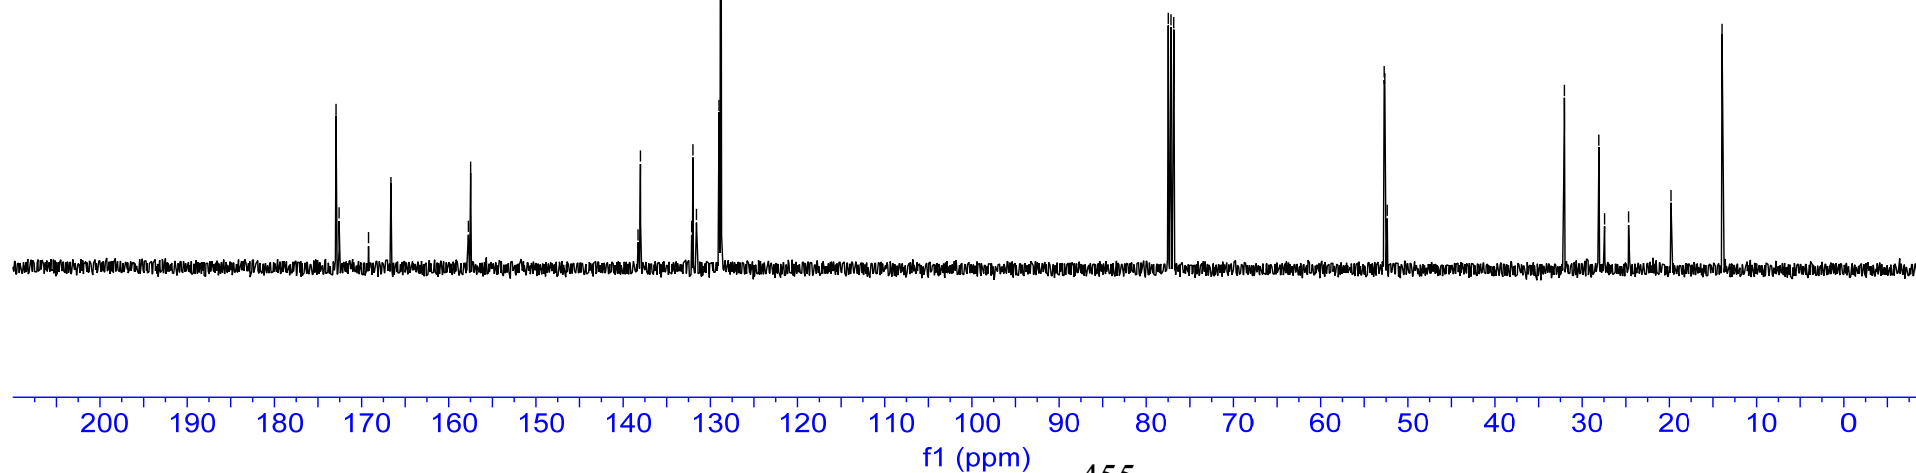

<sup>1</sup>H NMR, 400 MHz, CDCl<sub>3</sub>

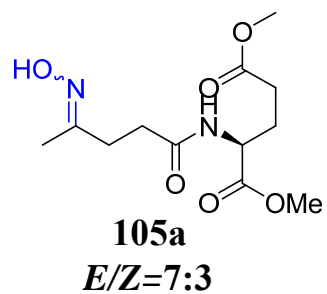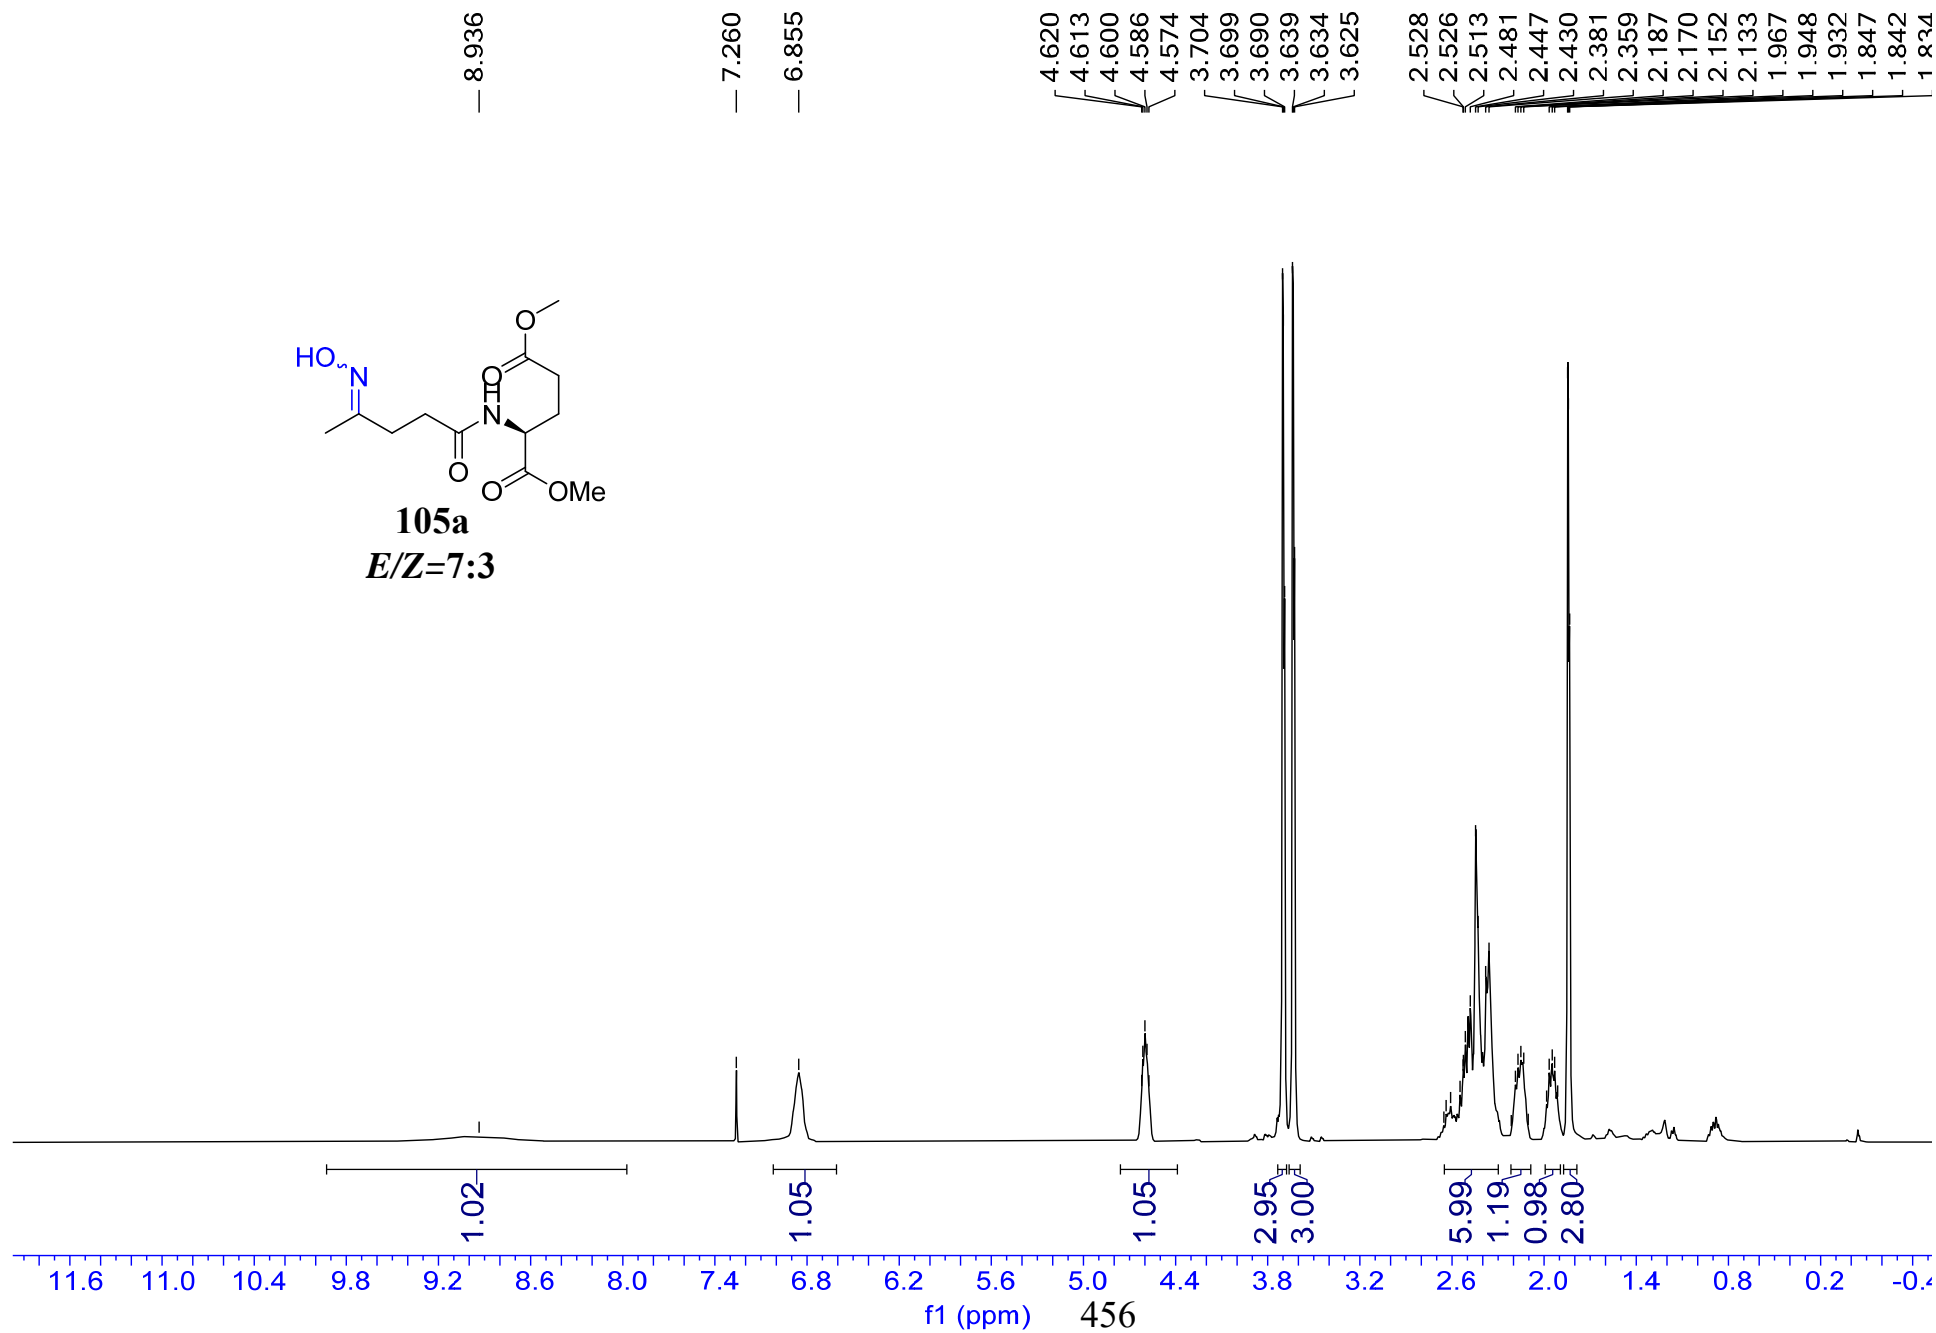

<sup>13</sup>C NMR 101 MHz, CDCl<sub>3</sub>

173.65  
173.46  
172.74  
172.61  
172.51  
172.04  
157.80  
157.01

77.48  
77.16  
76.84

52.59  
51.96  
51.70  
51.53

32.21  
31.91  
31.40  
30.14  
27.43  
27.24  
24.65  
20.11  
14.22

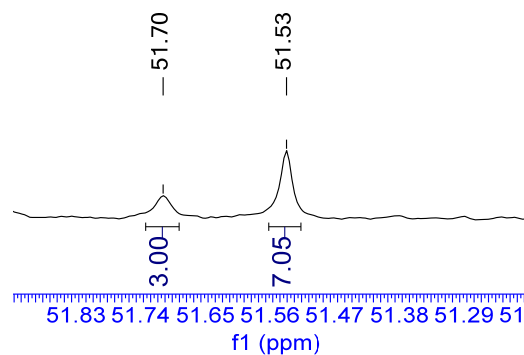

3.00  
7.05

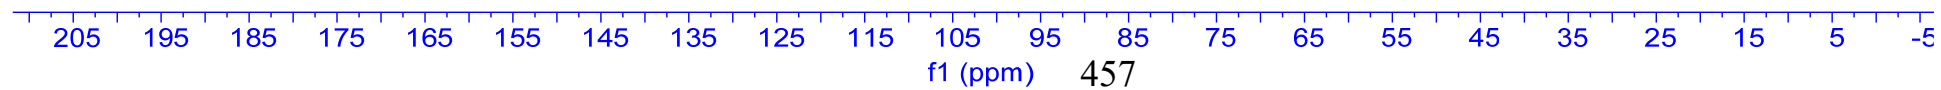

<sup>1</sup>H NMR, 400 MHz, CDCl<sub>3</sub>

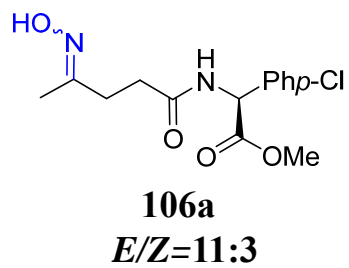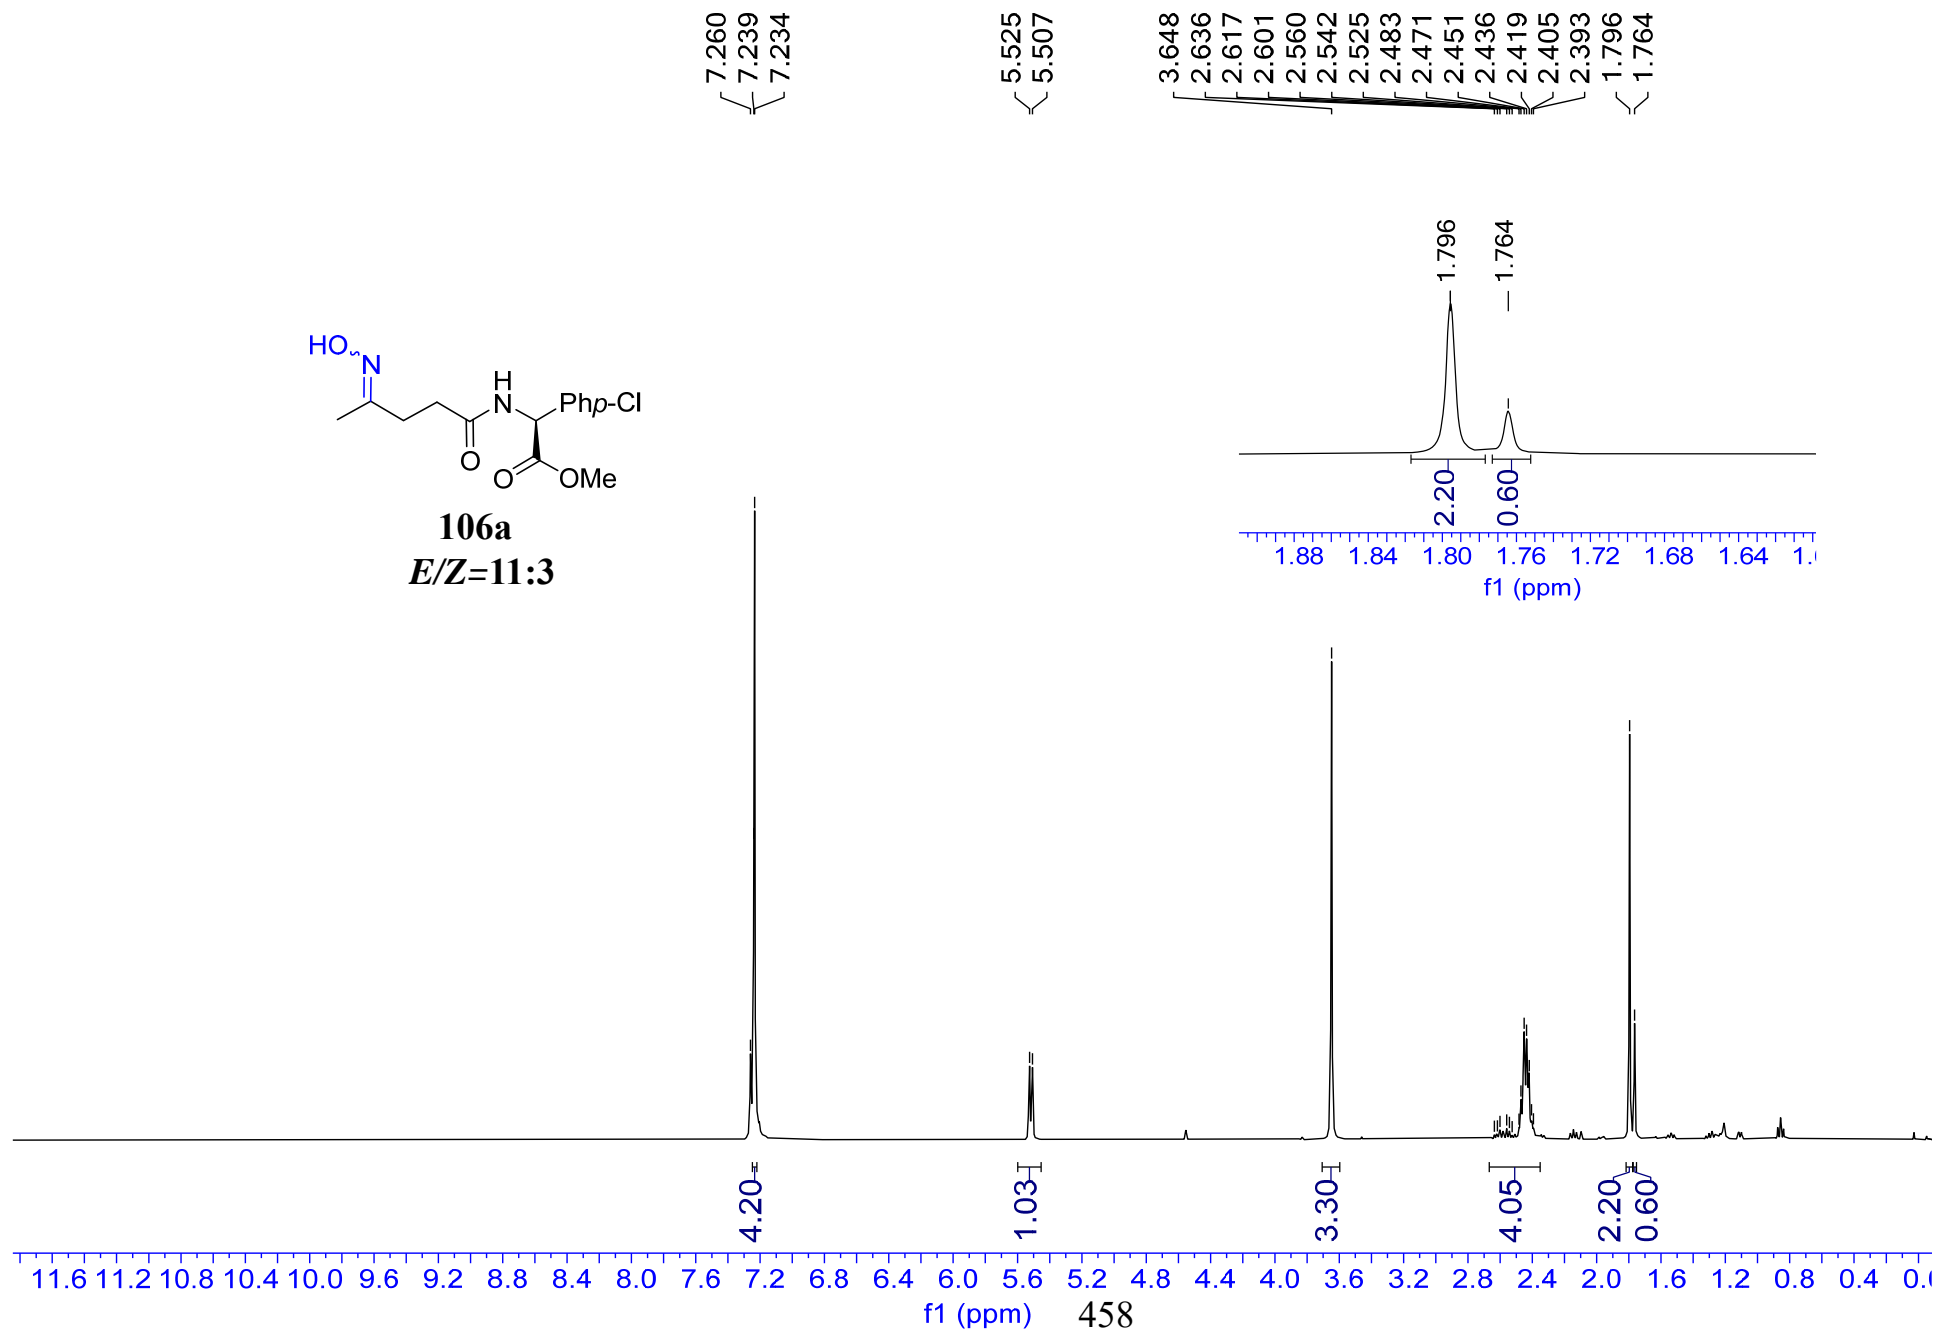

<sup>13</sup>C NMR 101 MHz, CDCl<sub>3</sub>

171.94  
171.52  
171.40  
171.28

157.65  
157.05

135.08  
135.03  
134.47  
134.40  
129.12  
129.09  
128.79  
128.75

77.48  
77.16  
76.84

55.90  
55.84  
53.00

32.02  
31.73  
31.29  
27.63  
24.55  
20.07  
14.21

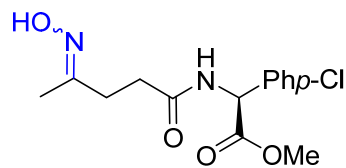

**106a**  
*E/Z*=11:3

171.94  
171.52  
171.40  
171.28

157.65  
157.05

135.08  
135.03  
134.47  
134.40

171.0 169.0 167.0 165.0 163.0 161.0 159.0 157  
f1 (ppm)

136.0 135.4 134.8 134.2 133.6 133.0 132.4  
f1 (ppm)

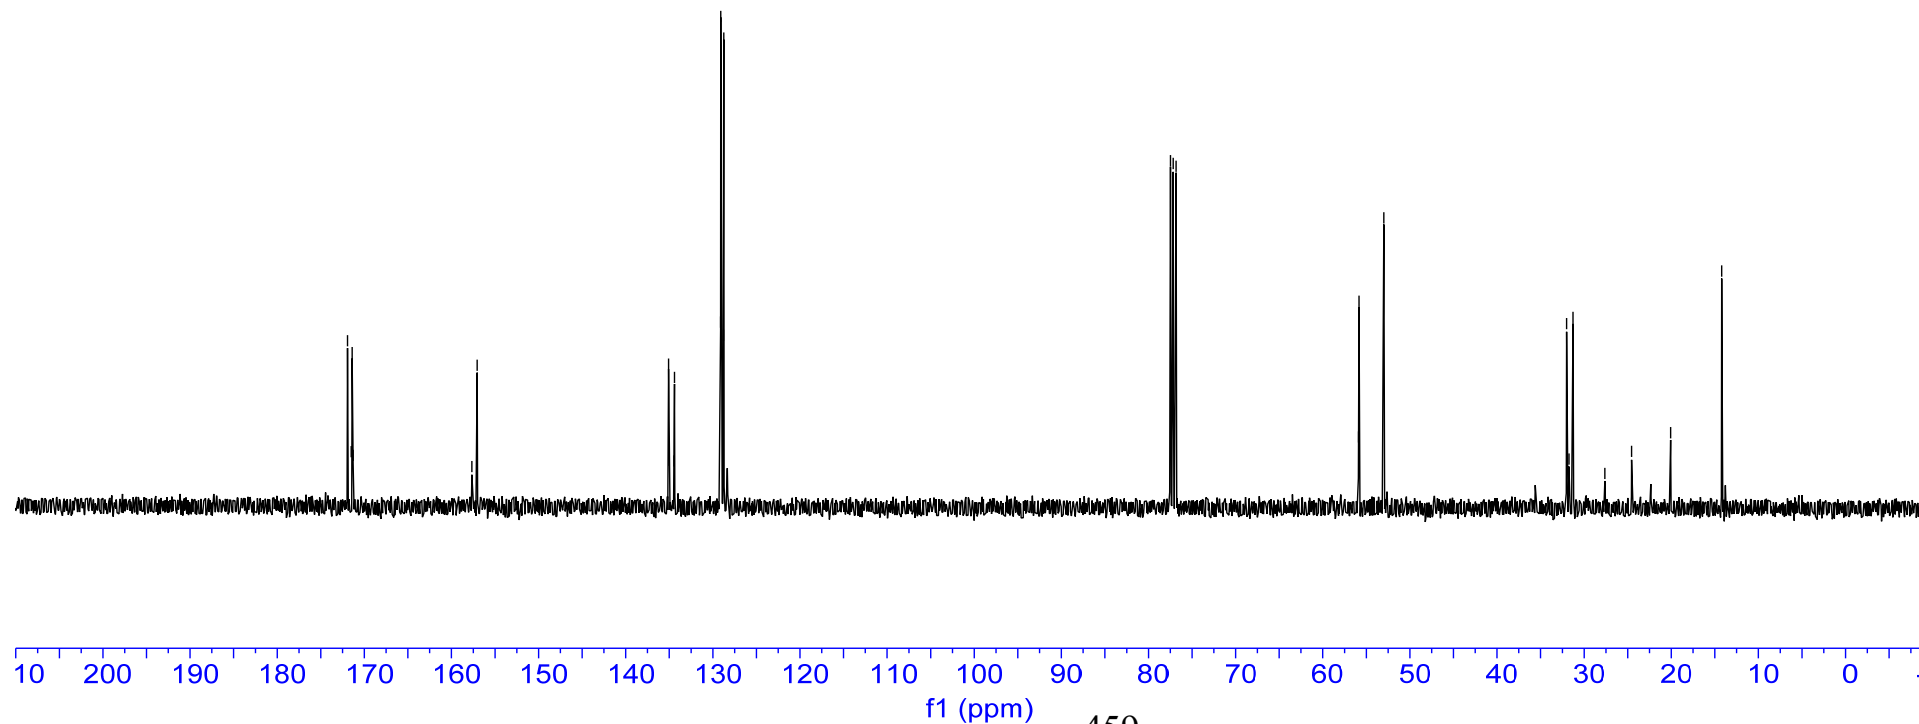

<sup>1</sup>H NMR, 400 MHz, CDCl<sub>3</sub>

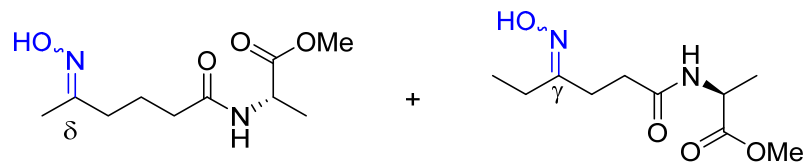

**107a**  
 $\gamma:\delta=1:2$   
 $\delta, E/Z=3:1$   
 $\gamma, E/Z=1:1$

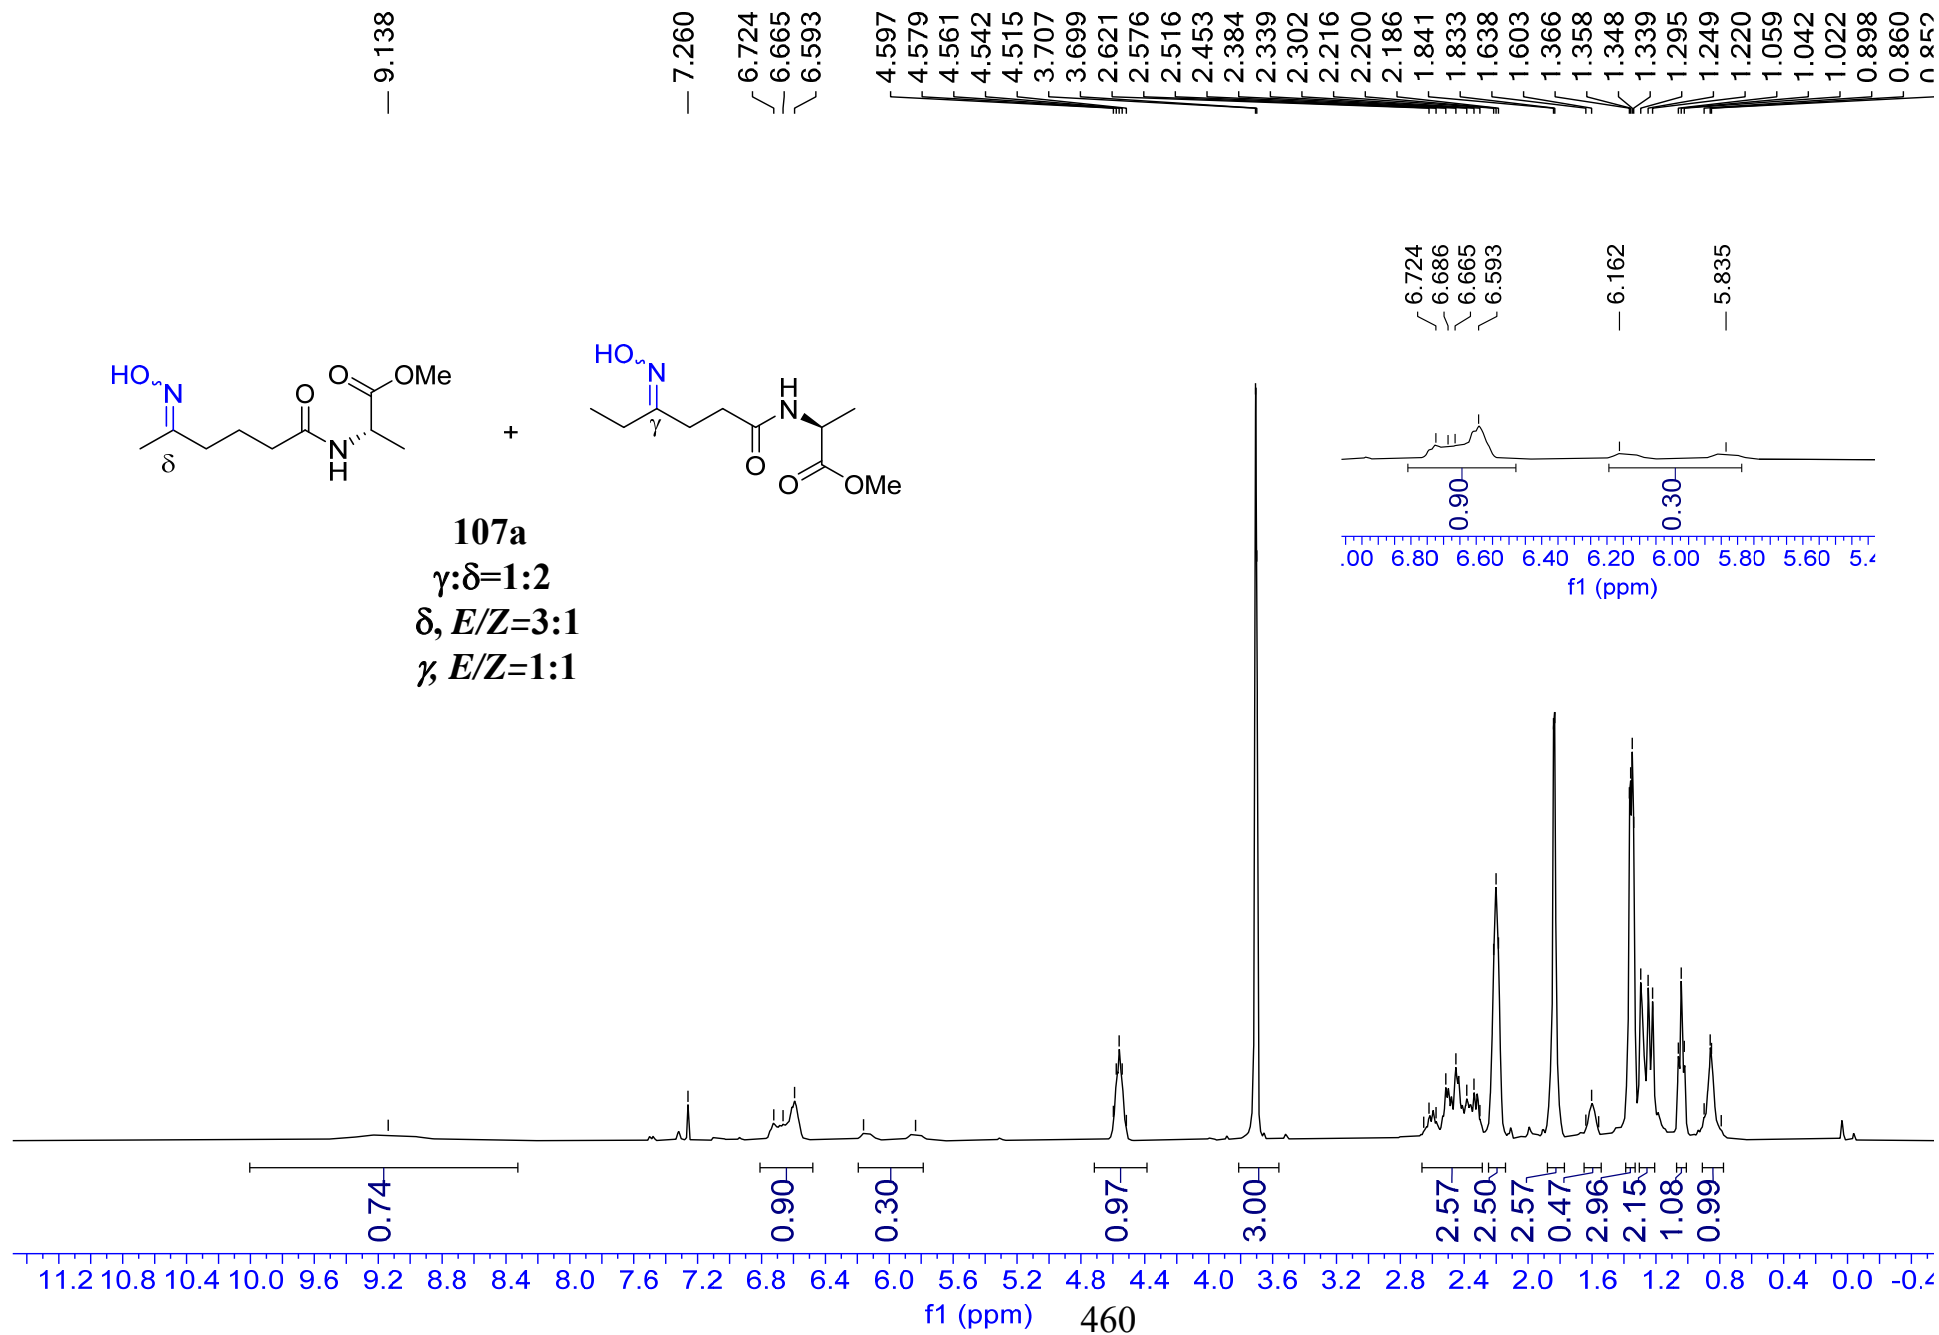



$^{13}\text{C}$  NMR 101 MHz,  $\text{CDCl}_3$

174.02  
173.84  
172.54  
172.21  
161.44  
161.30  
158.10  
157.70

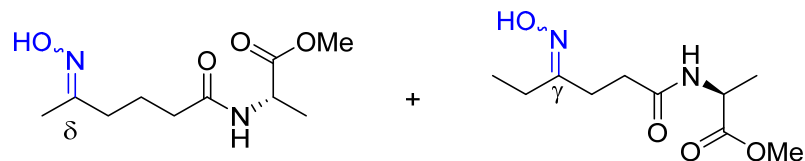

**107a**  
 $\gamma:\delta=1:2$   
 $\delta, E/Z=3:1$   
 $\gamma, E/Z=1:1$

77.48  
77.16  
76.84  
52.50  
48.05  
48.03  
35.93  
35.73  
35.29  
34.99  
32.15  
31.45  
30.25  
29.73  
29.15  
27.88  
27.80  
25.30  
23.69  
22.41  
21.97  
21.54  
21.51  
19.74  
18.27  
13.94  
13.52  
10.75  
10.05

161.35  
161.21

158.01  
157.61

$\gamma$

$\delta$

162.2 161.4 160.6 159.8 159.0 158.2 157.4 15  
 f1 (ppm)

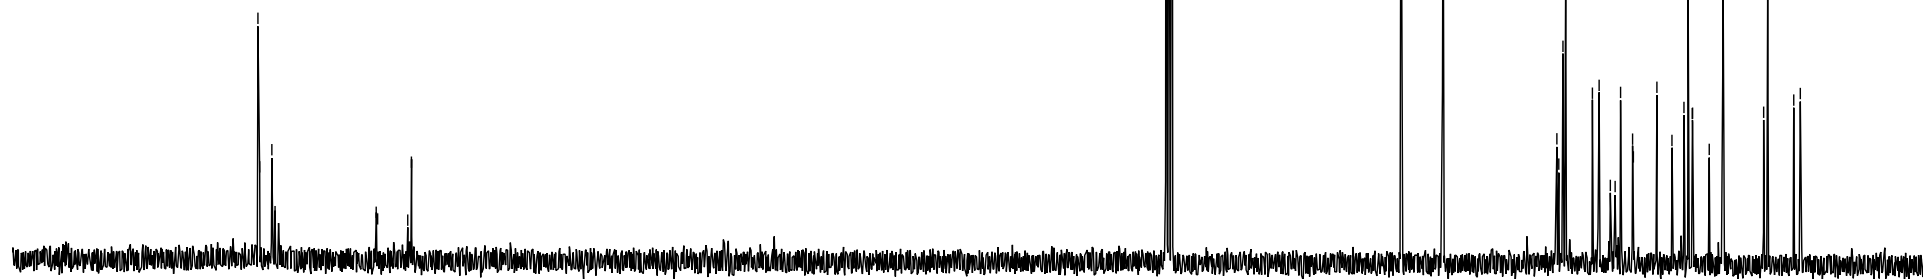

f1 (ppm) 461

<sup>1</sup>H NMR, 400 MHz, CDCl<sub>3</sub>

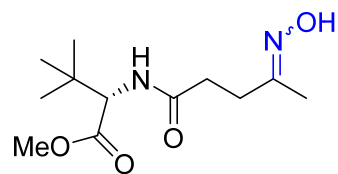

**108a**  
*E/Z*=3:1

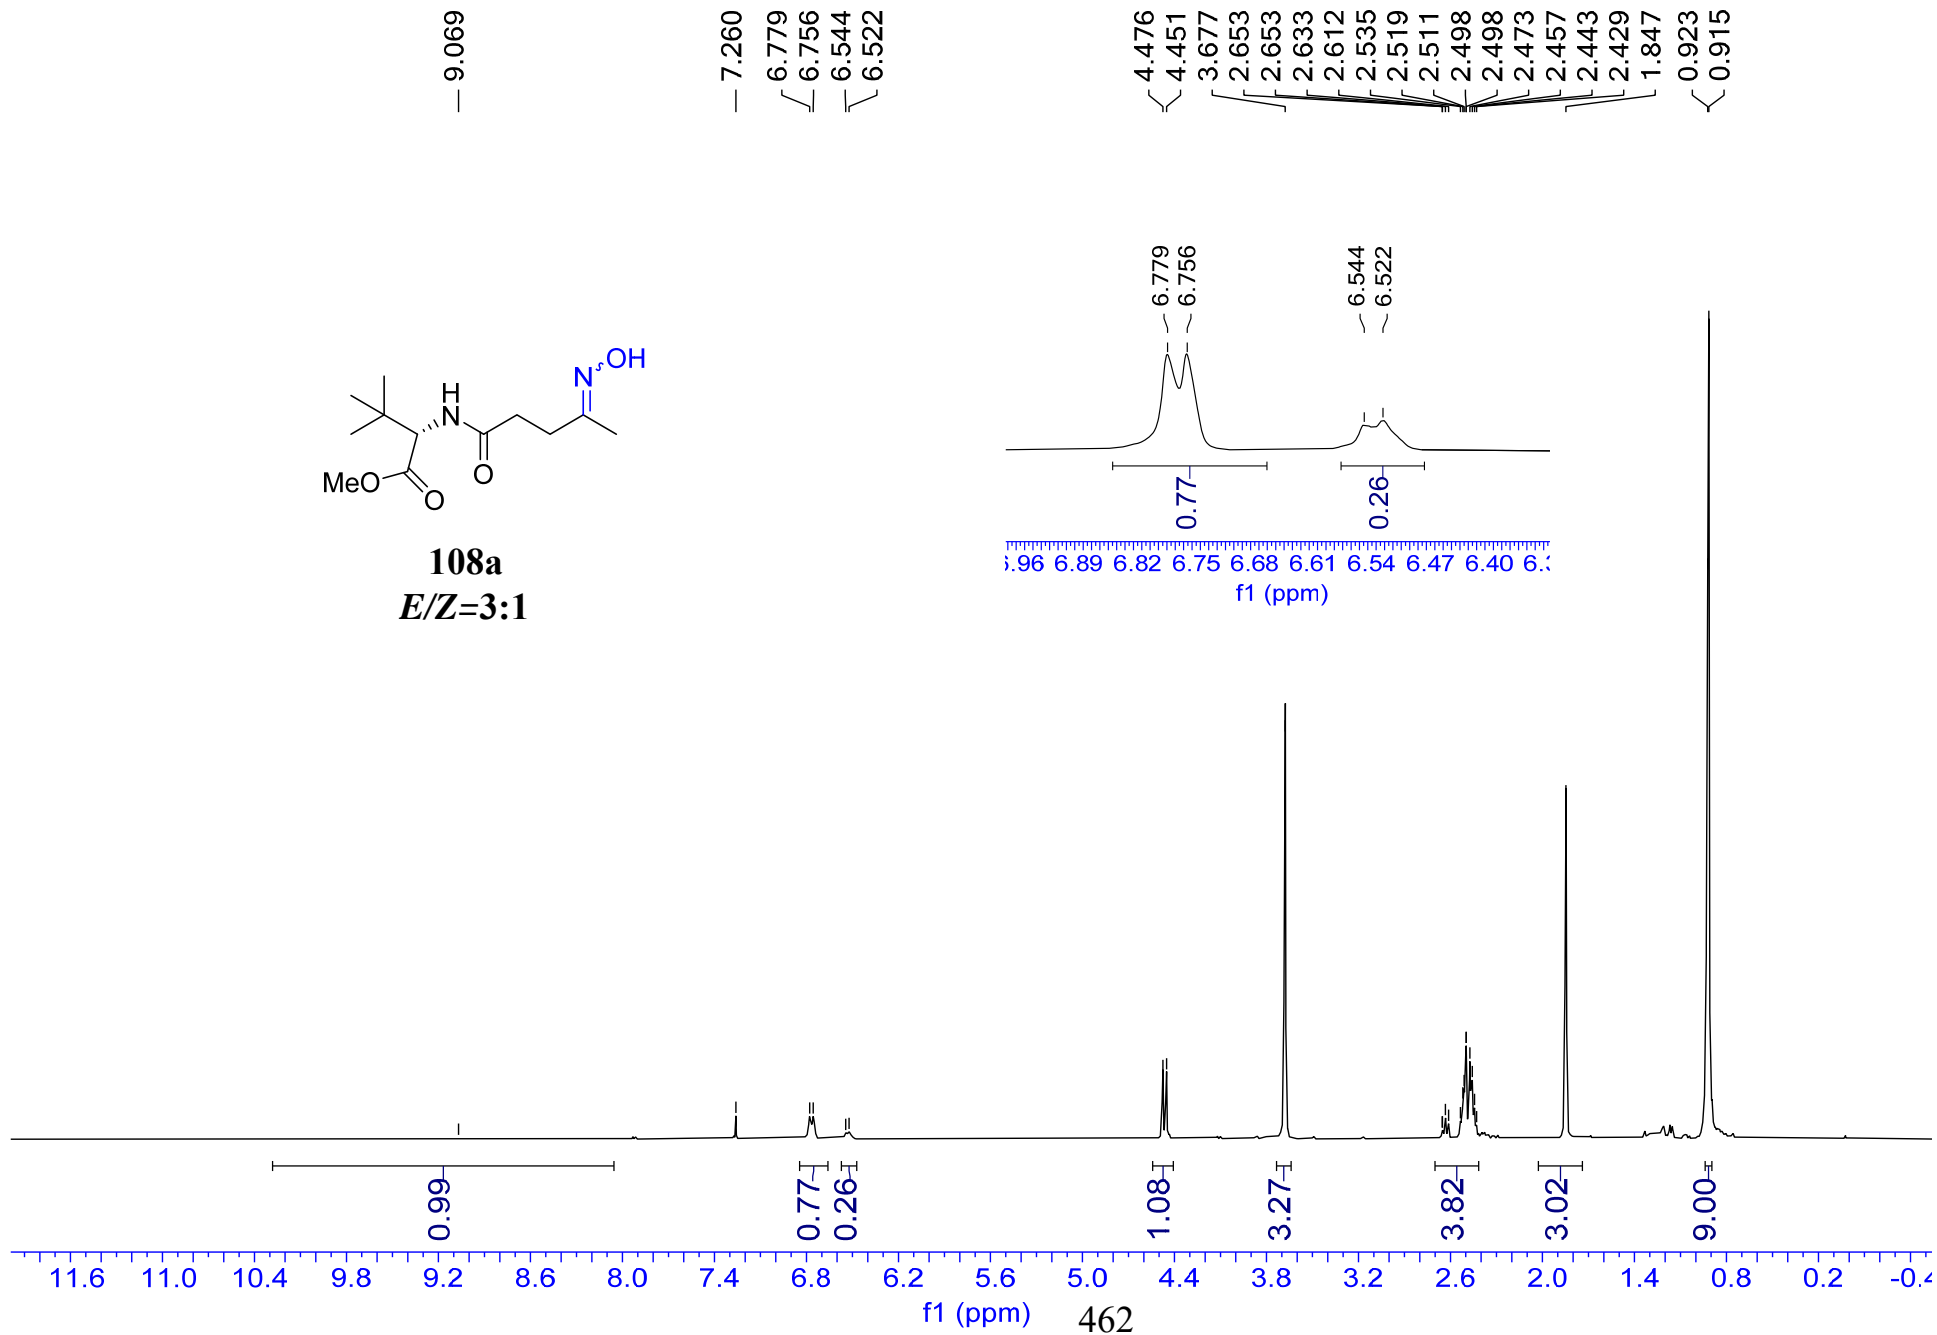

<sup>13</sup>C NMR 101 MHz, CDCl<sub>3</sub>

172.78  
172.45  
172.30  
171.84

157.57  
157.03

77.48  
77.16  
76.84

60.08  
60.03

51.93  
51.89

34.70  
34.35  
32.53  
32.10  
31.76  
26.61  
24.73  
20.14  
14.16

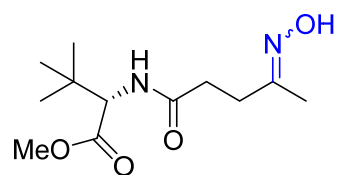

**108a**  
*E/Z*=3:1

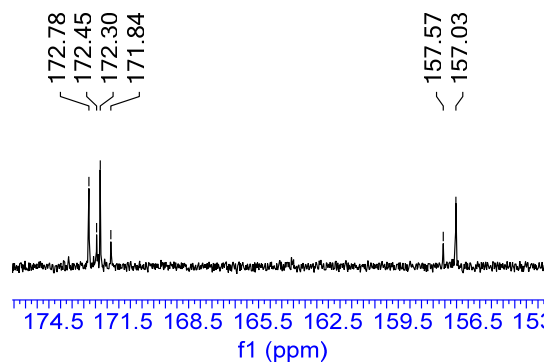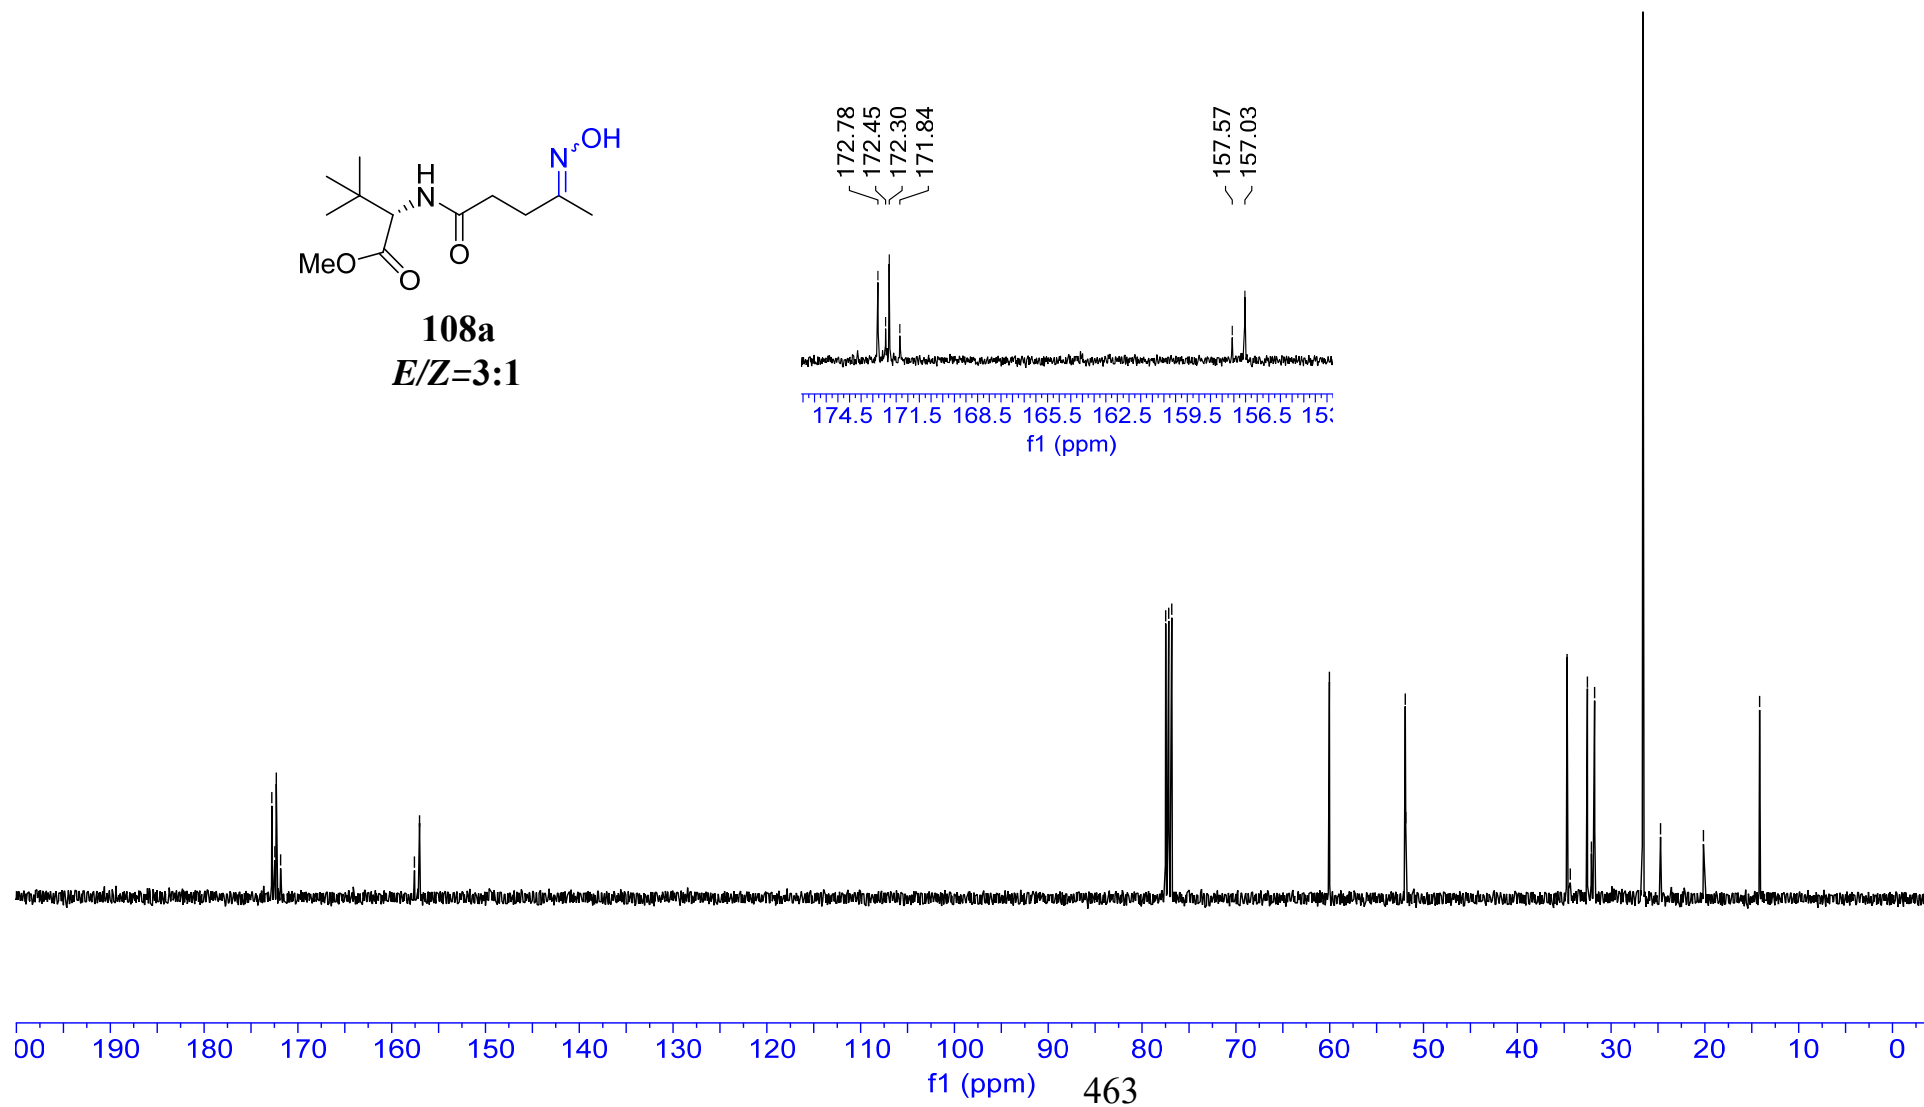

<sup>1</sup>H NMR, 400 MHz, CDCl<sub>3</sub>

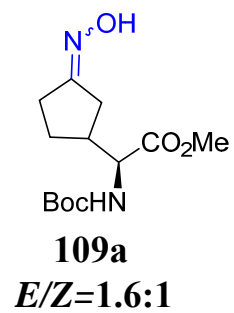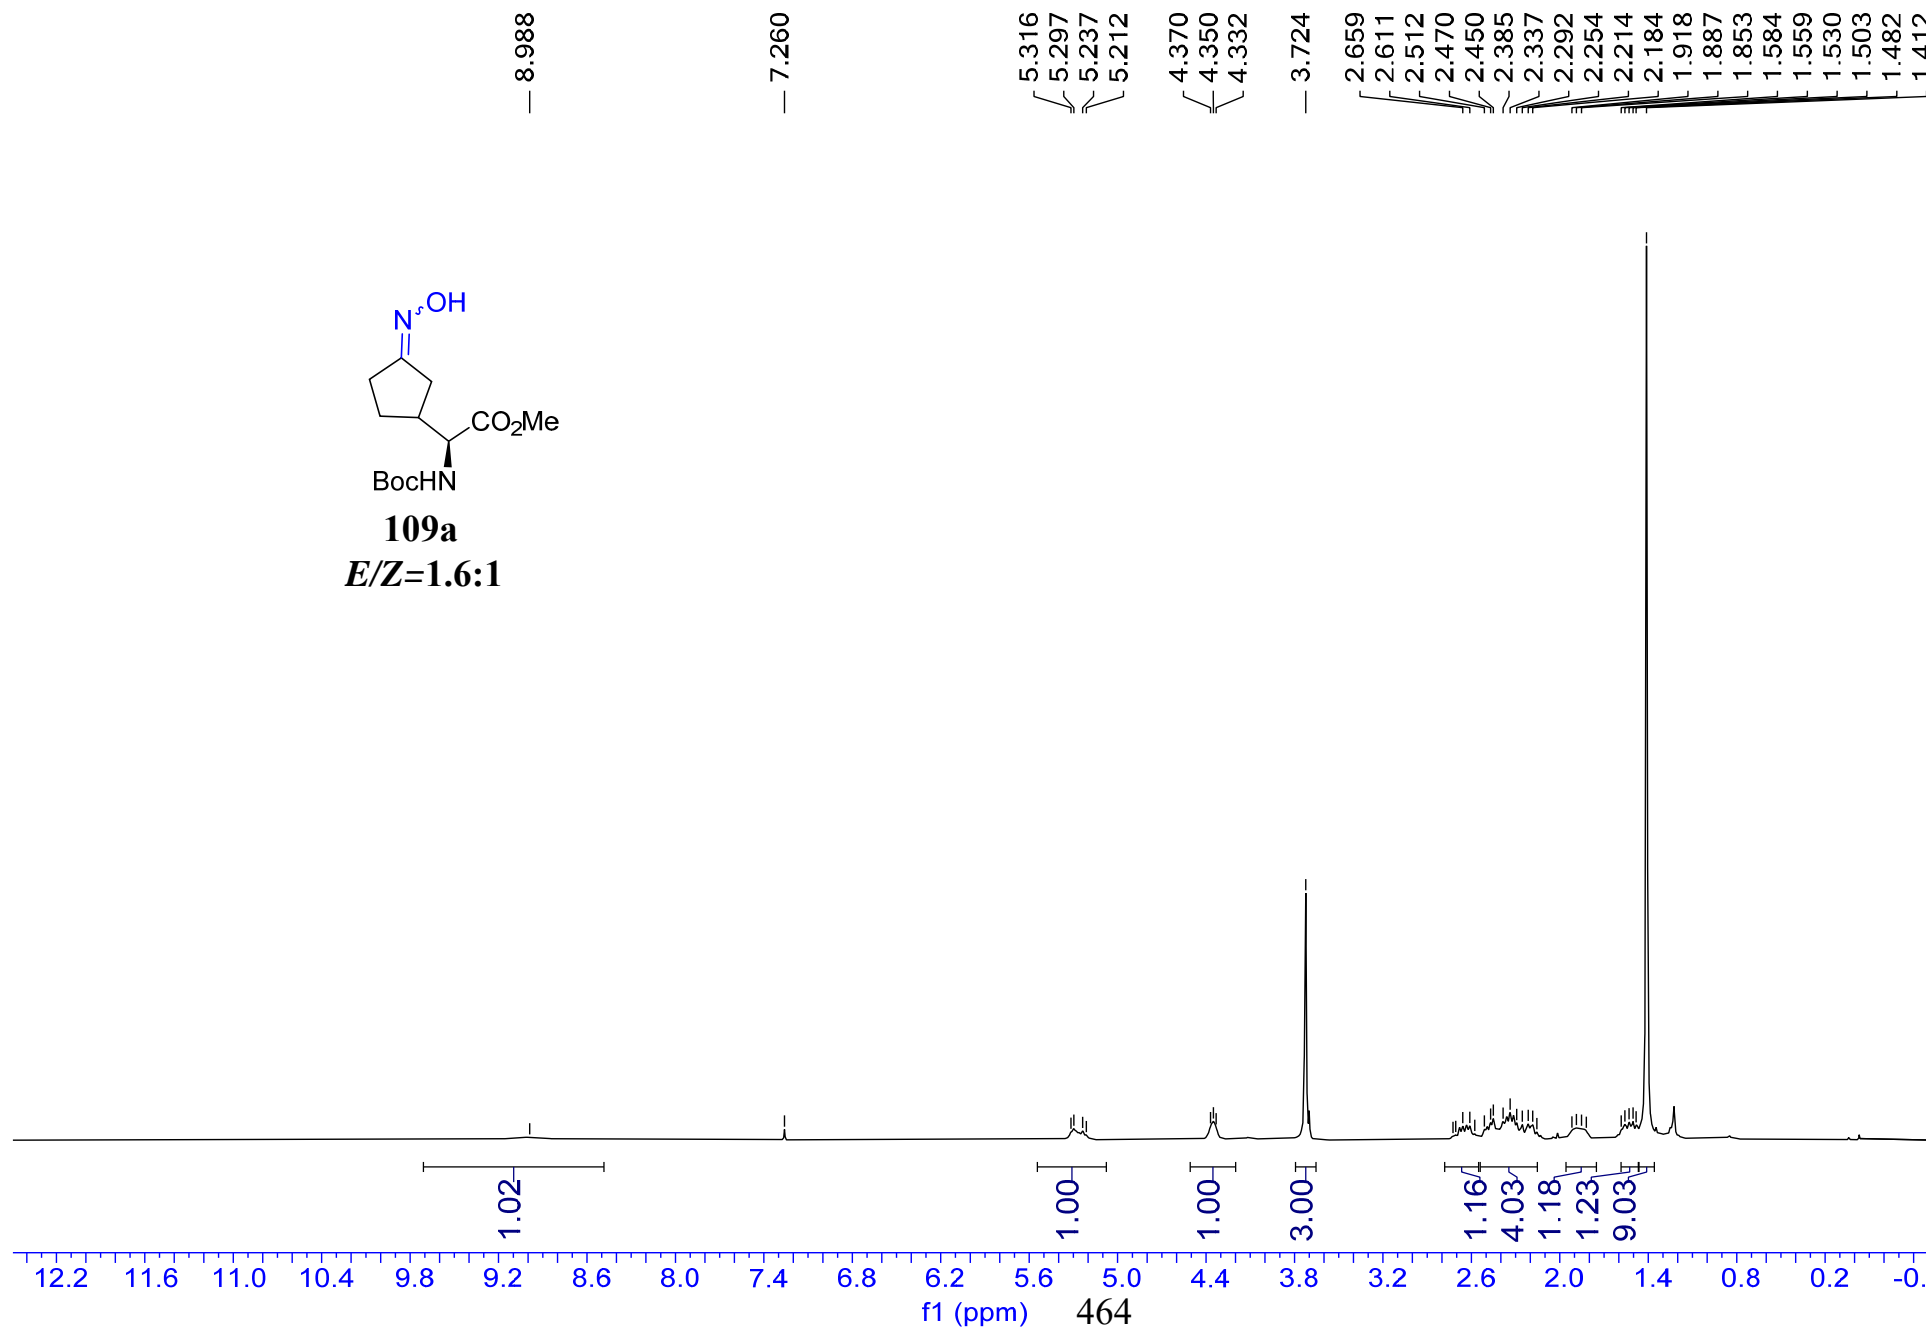

<sup>13</sup>C NMR 101 MHz, CDCl<sub>3</sub>

— 172.67  
— 164.89  
— 164.73  
— 164.49  
— 155.60

80.28  
77.48  
77.16  
76.84

55.75  
55.58  
52.45

41.77  
41.32  
33.75  
33.02

30.19  
29.95  
29.76  
29.25  
28.36  
27.91  
27.31  
27.20  
26.76  
26.46

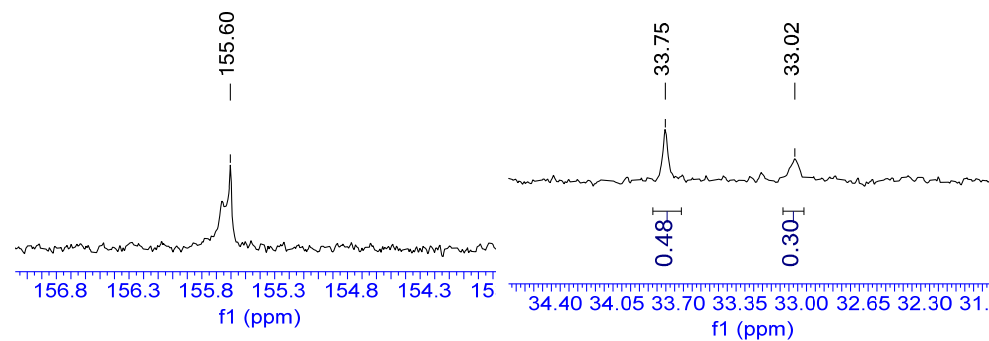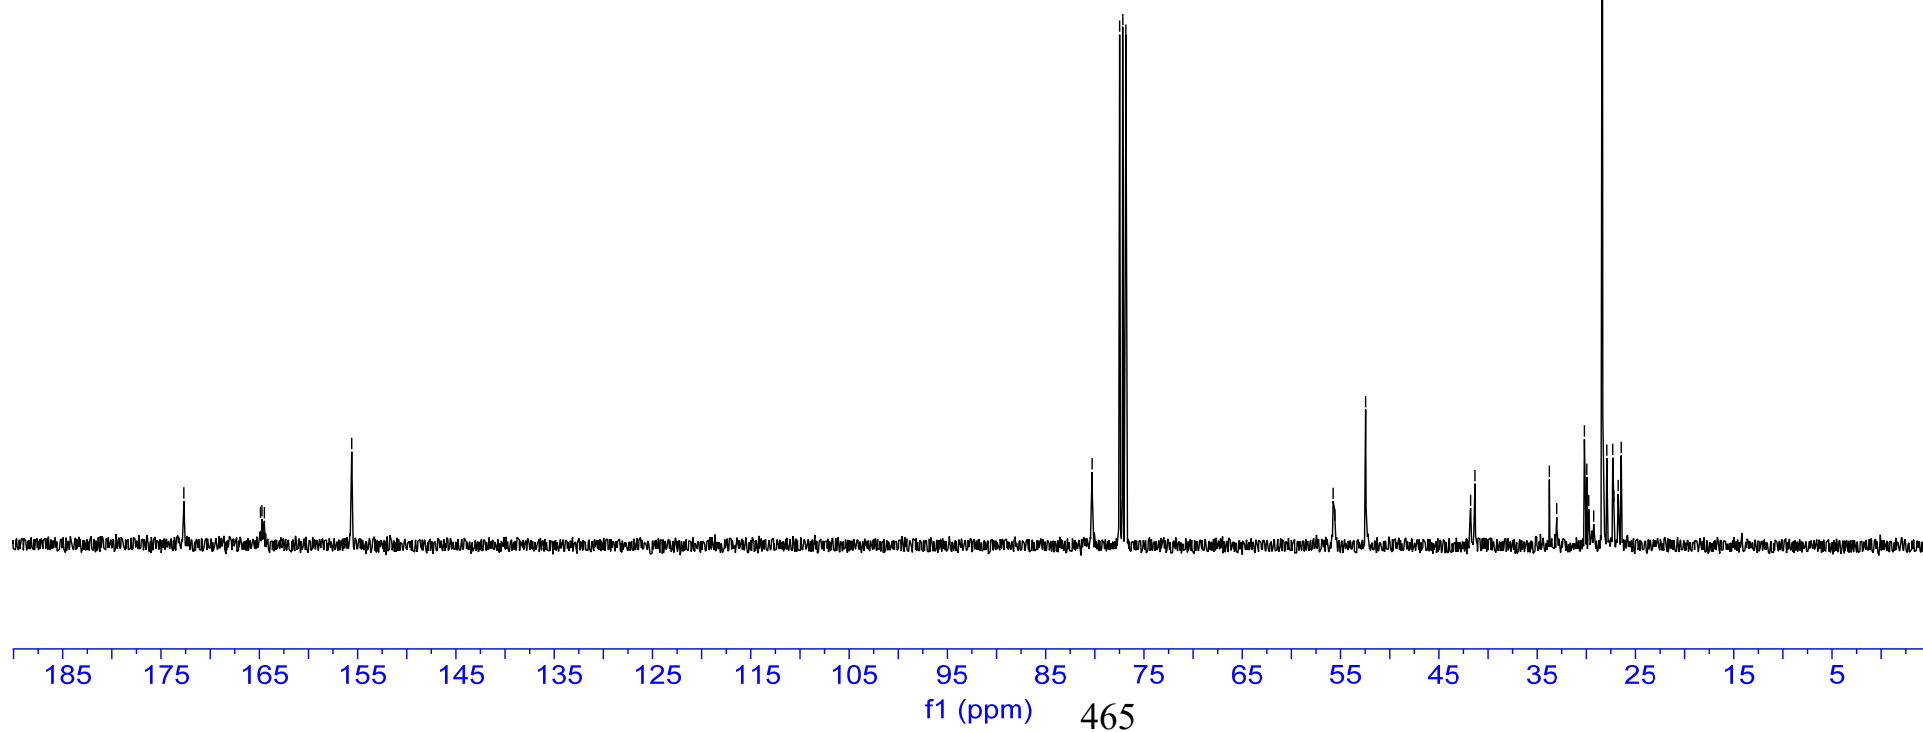

<sup>1</sup>H NMR, 400 MHz, CDCl<sub>3</sub>

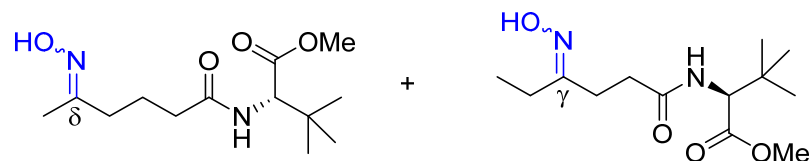

**110a**

$\gamma:\delta=1:3$

$\delta, E/Z=10:3$

$\gamma, E/Z=1:1$

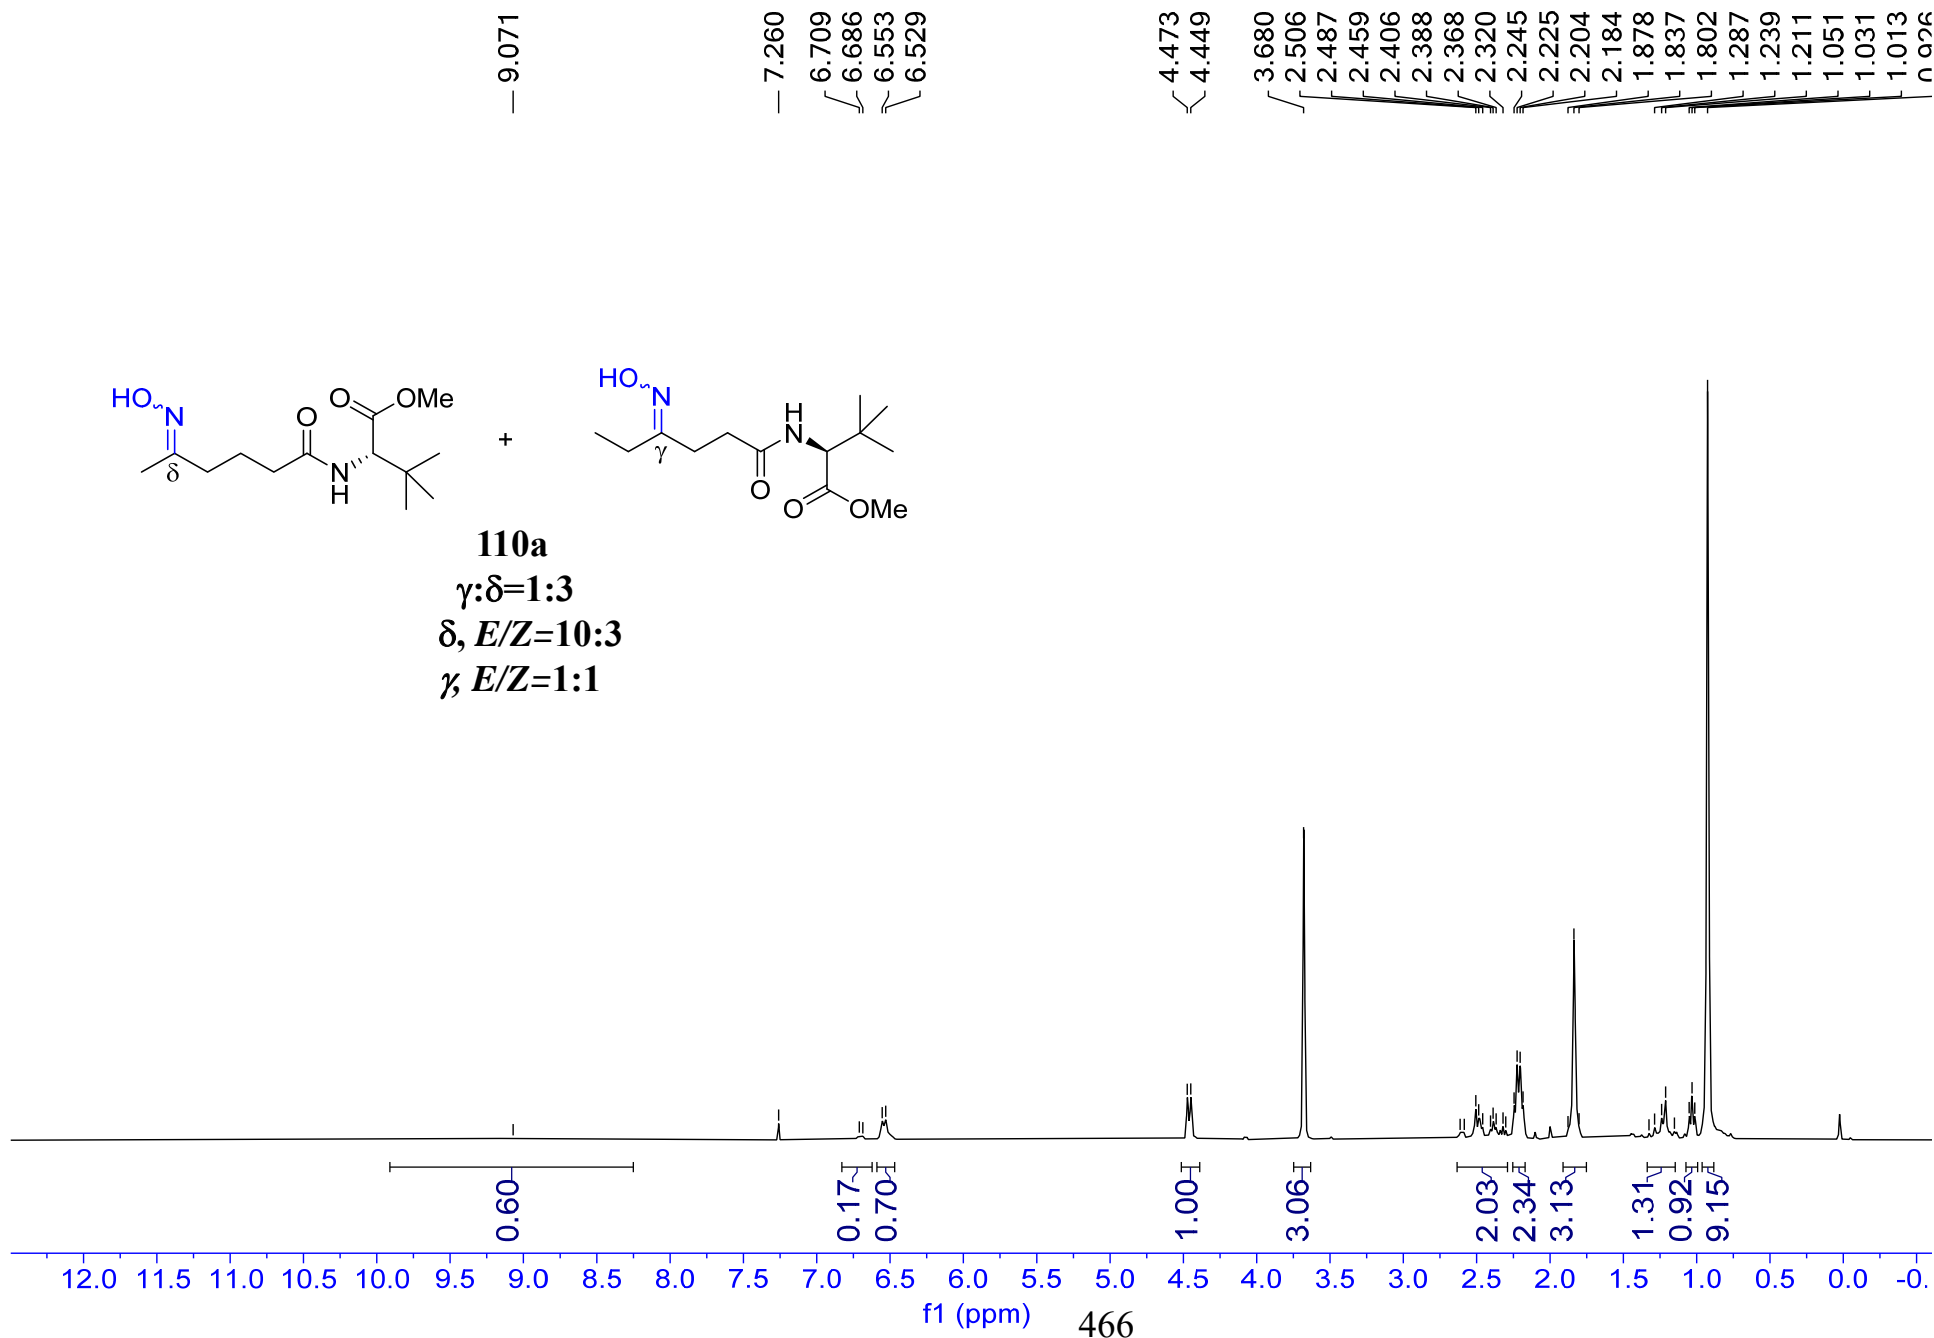

$^{13}\text{C}$  NMR 101 MHz,  $\text{CDCl}_3$

172.71  
172.67  
172.61  
172.56  
172.50  
172.45  
161.43  
161.26  
158.01  
157.65

77.48  
77.16  
76.84  
60.06  
60.04  
60.00  
59.97  
51.89  
51.87  
35.58  
35.09  
34.70  
32.28  
29.38  
27.94  
26.64  
26.61  
26.59  
22.13  
21.62  
21.57  
19.74  
13.51  
10.78  
10.04



**110a**

$\gamma:\delta=1:3$

$\delta, E/Z=10:3$

$\gamma, E/Z=1:1$

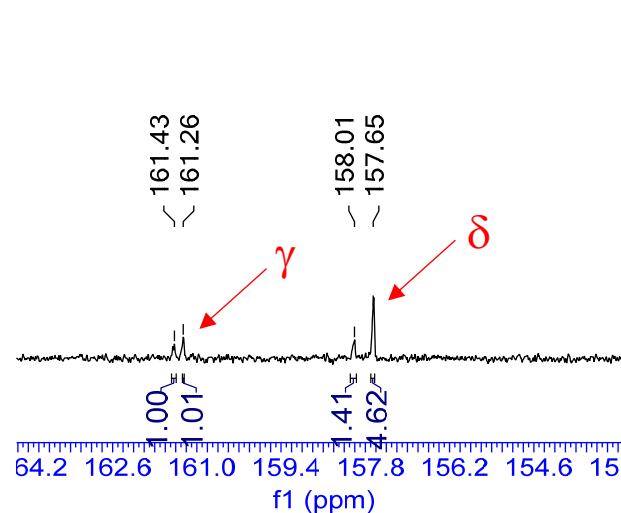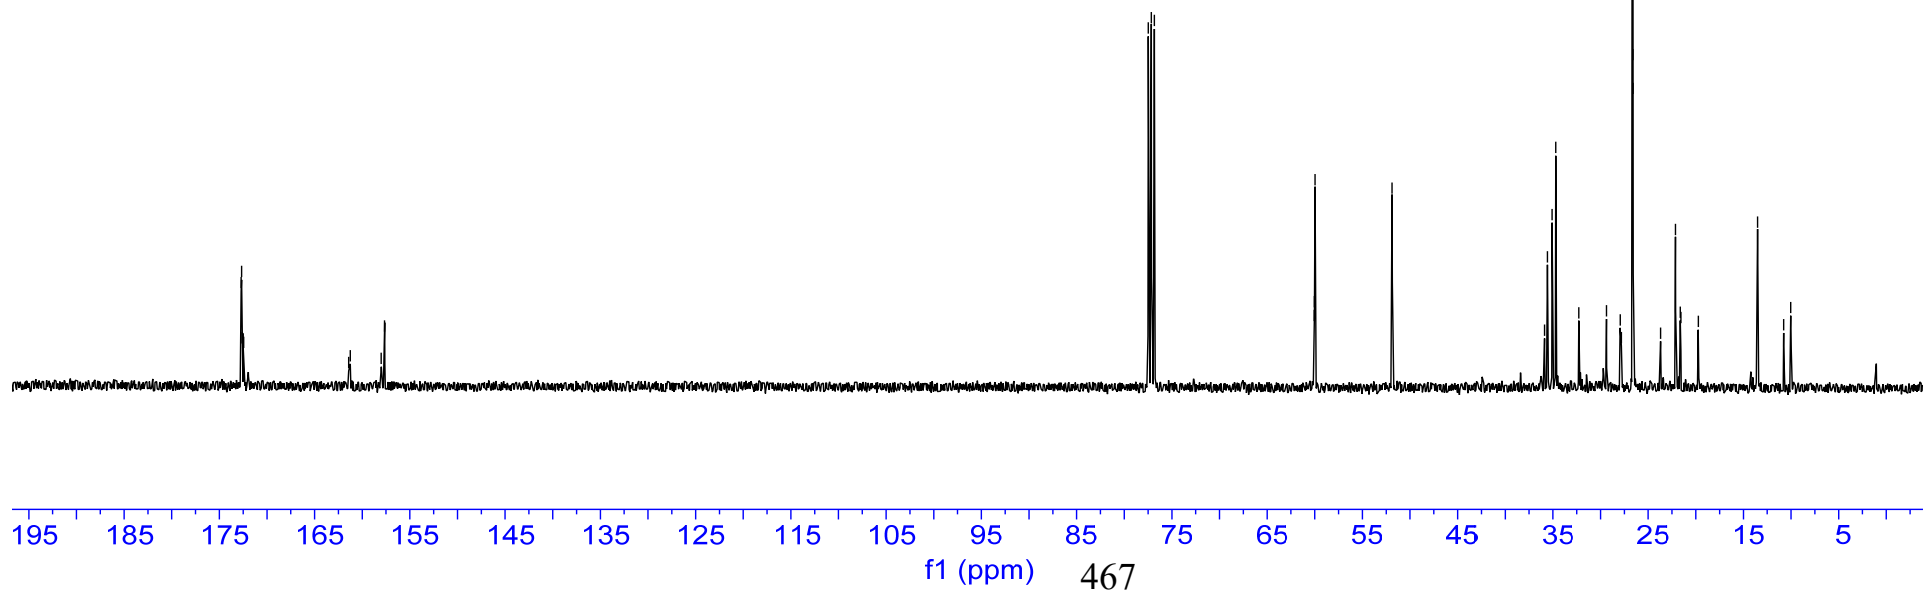

<sup>1</sup>H NMR, 400 MHz, CDCl<sub>3</sub>

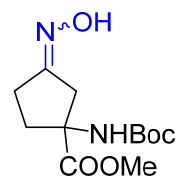

**111a**  
*E/Z*=3:1

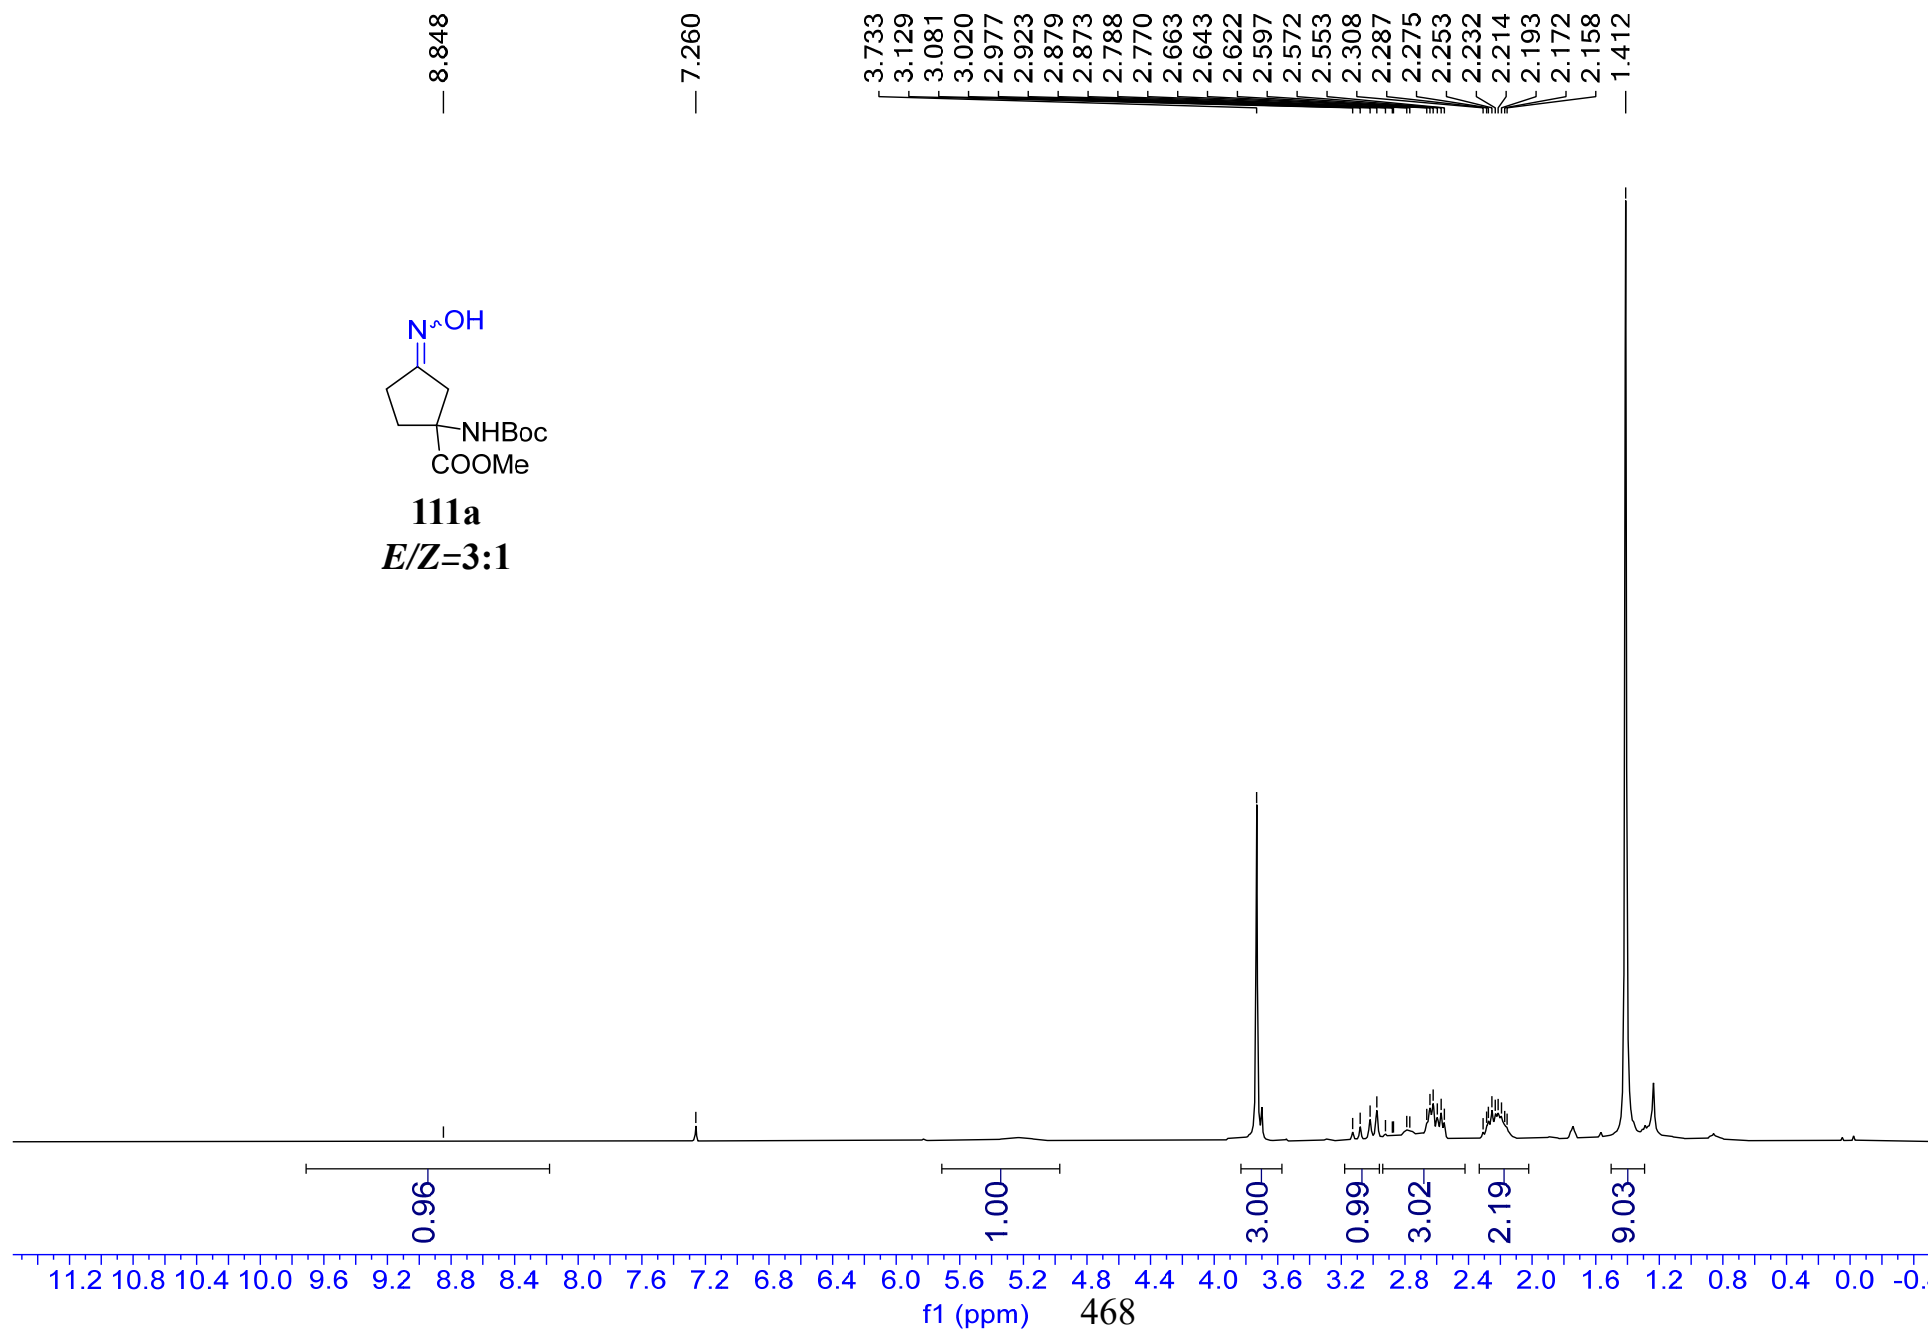



<sup>13</sup>C NMR 101 MHz, CDCl<sub>3</sub>

173.76  
173.50

162.94  
162.41

— 155.43

80.56  
77.48  
77.16  
76.84

64.28  
64.16

— 52.76

— 41.43  
33.98  
29.79  
28.41  
28.36  
28.28  
25.05  
24.59

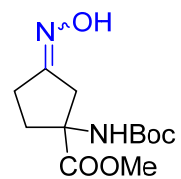

**111a**  
*E/Z*=3:1

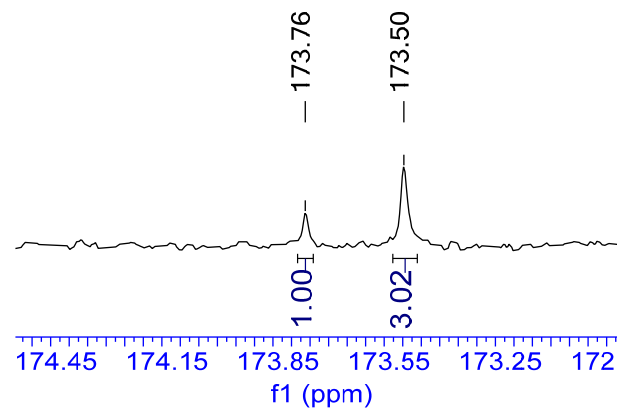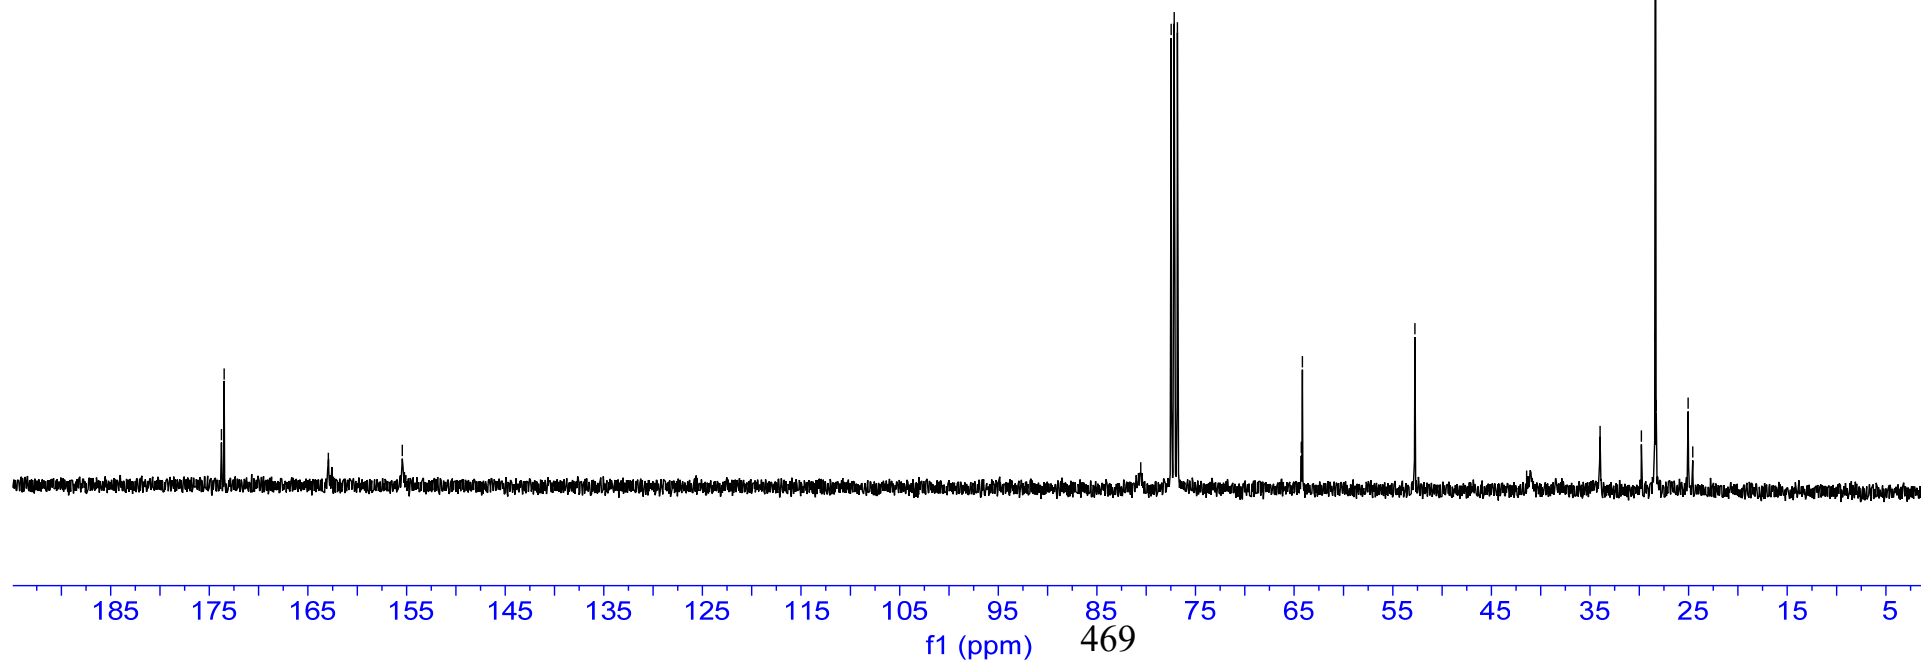

<sup>1</sup>H NMR, 400 MHz, CDCl<sub>3</sub>

— 8.315

— 7.260

— 5.500

3.784  
3.522  
3.515  
3.483  
3.476  
3.471  
3.464  
3.457  
3.451  
3.242

— 1.428

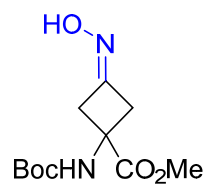

**112a**

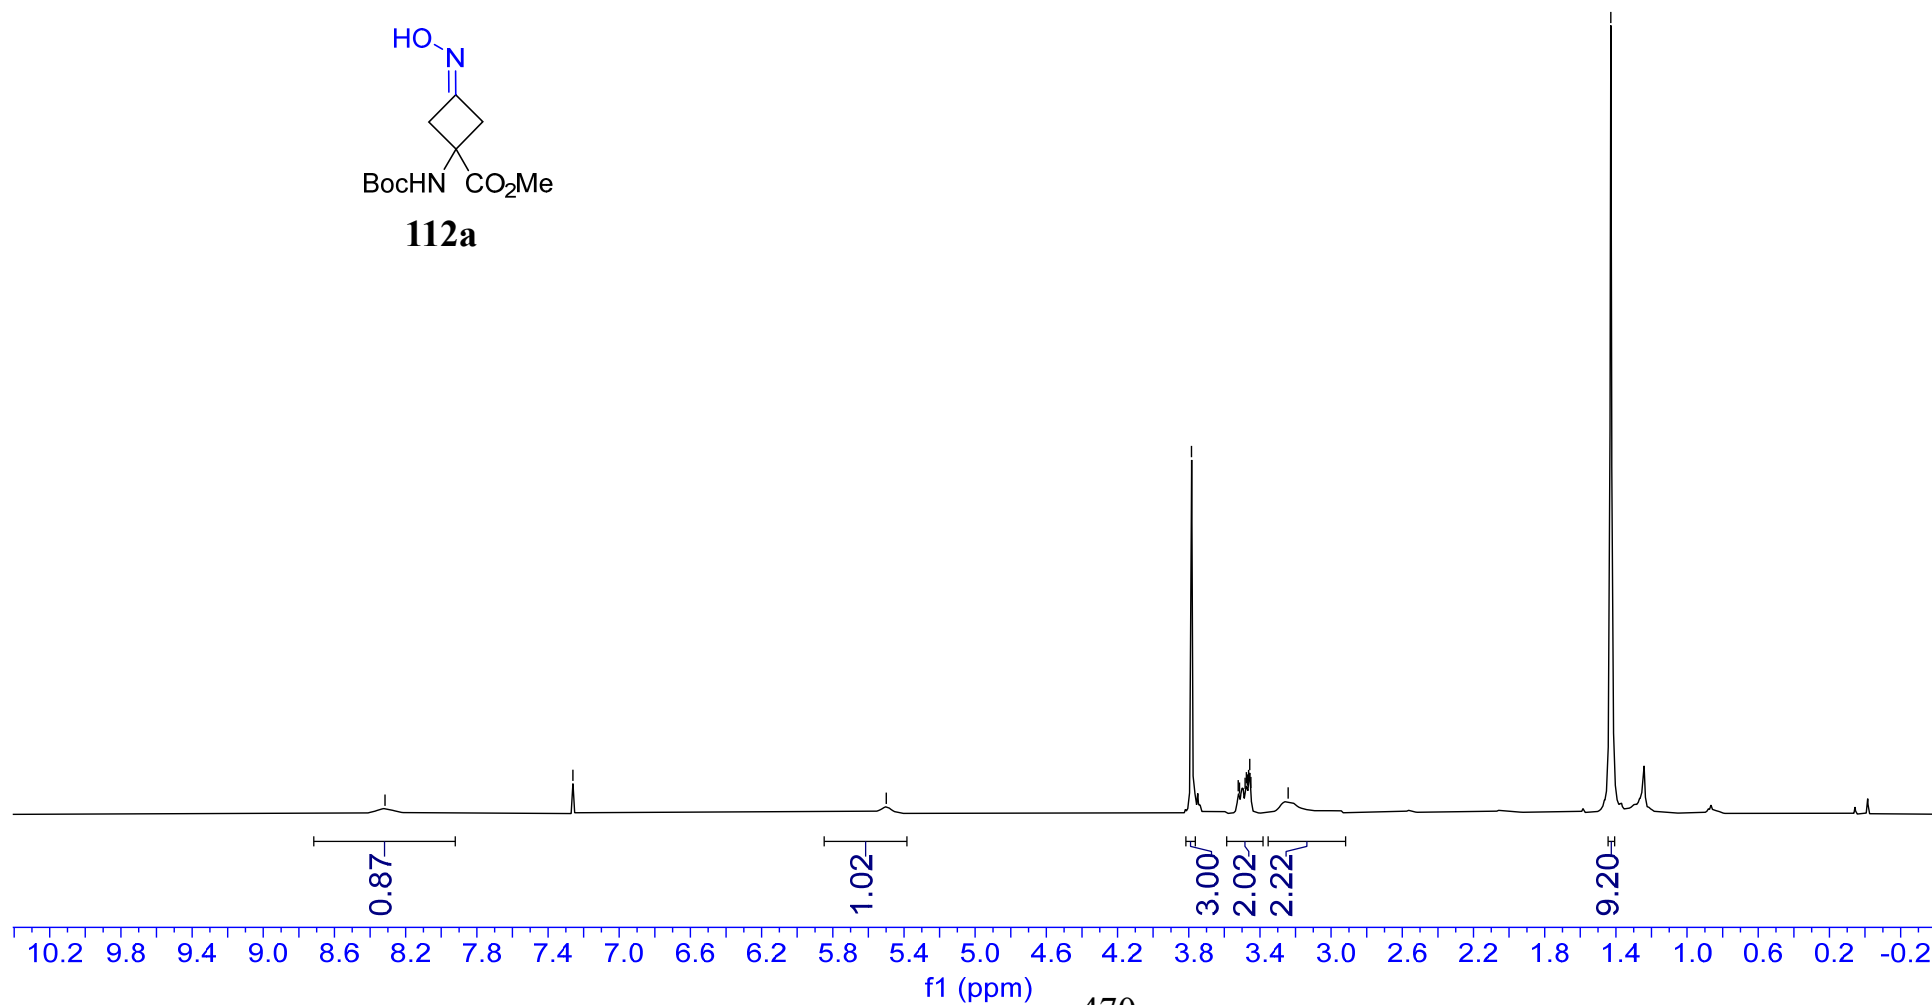

$^{13}\text{C}$  NMR 101 MHz,  $\text{CDCl}_3$

— 173.27

— 155.06  
— 152.06

77.48  
77.16  
76.84

53.29  
53.13

42.57  
41.79

29.81  
28.37



**112a**

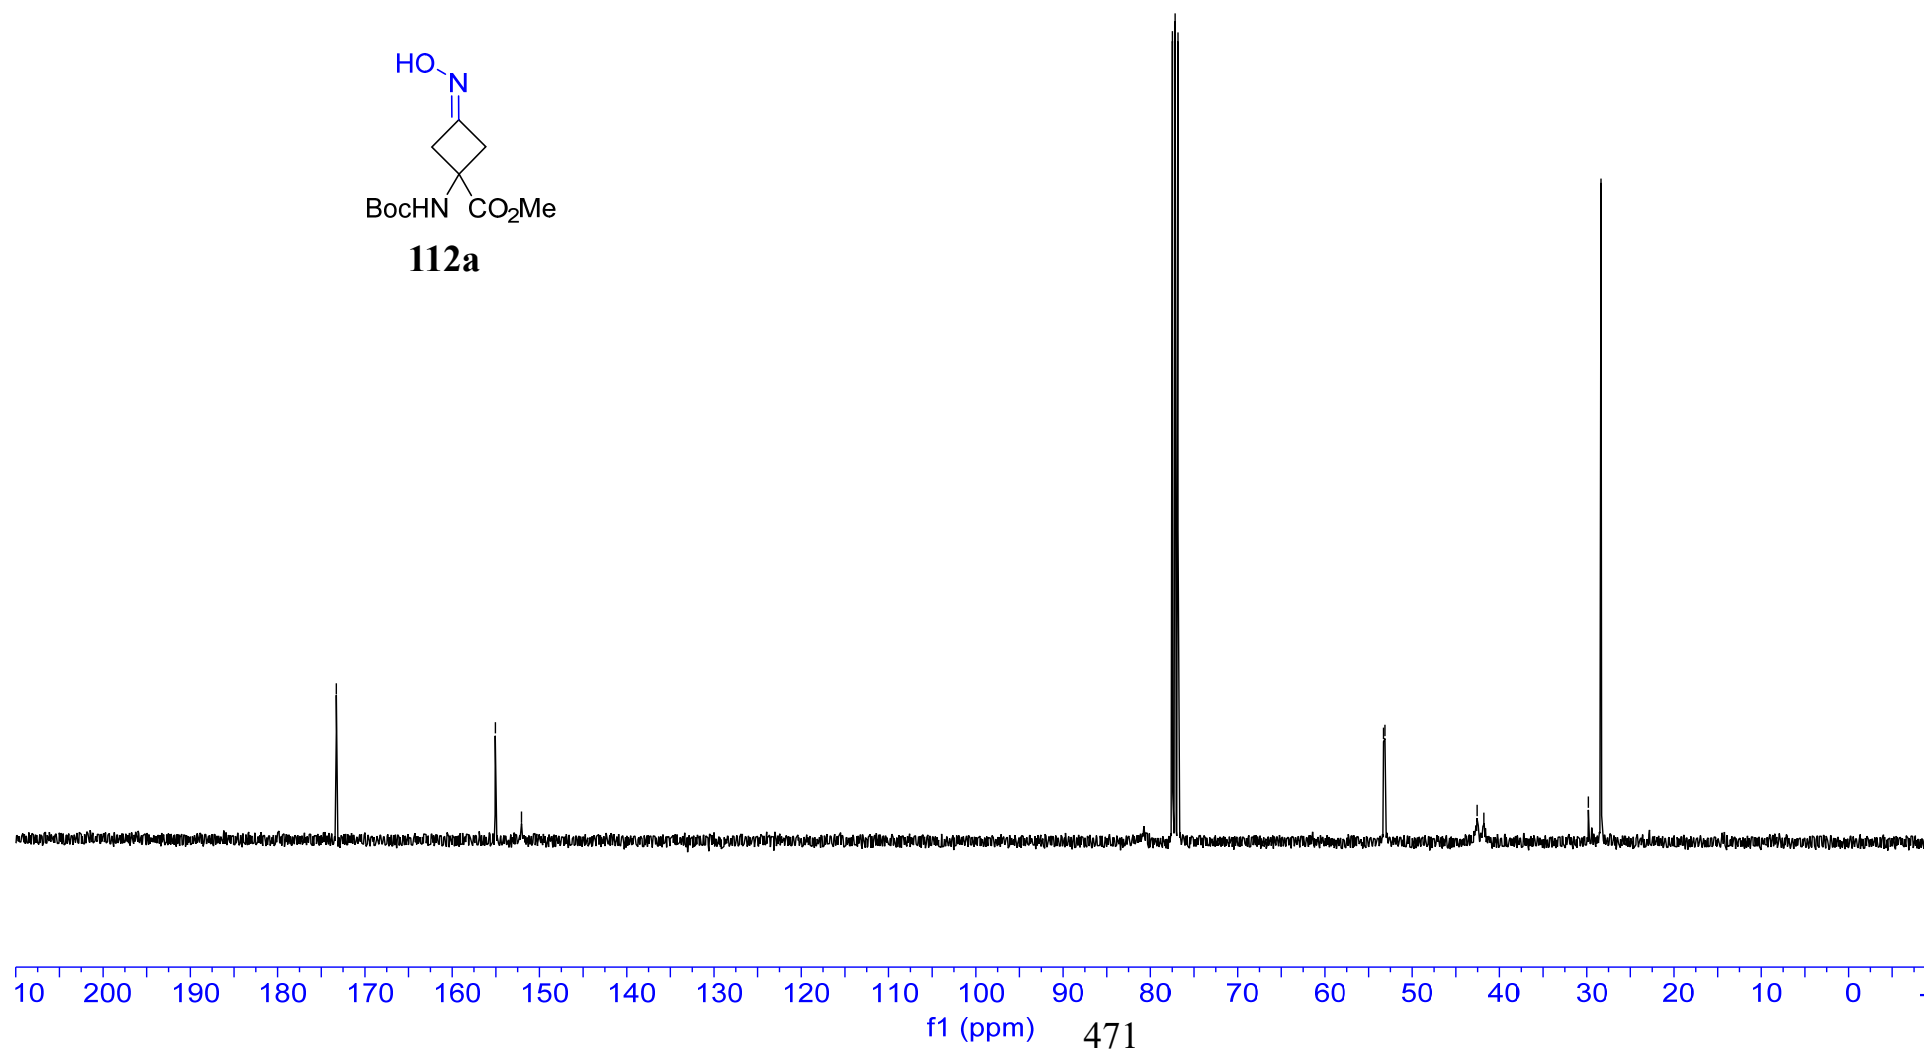

<sup>1</sup>H NMR, 400 MHz, CDCl<sub>3</sub>

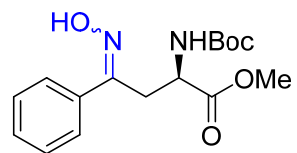

**113a**

*E/Z*=11:1

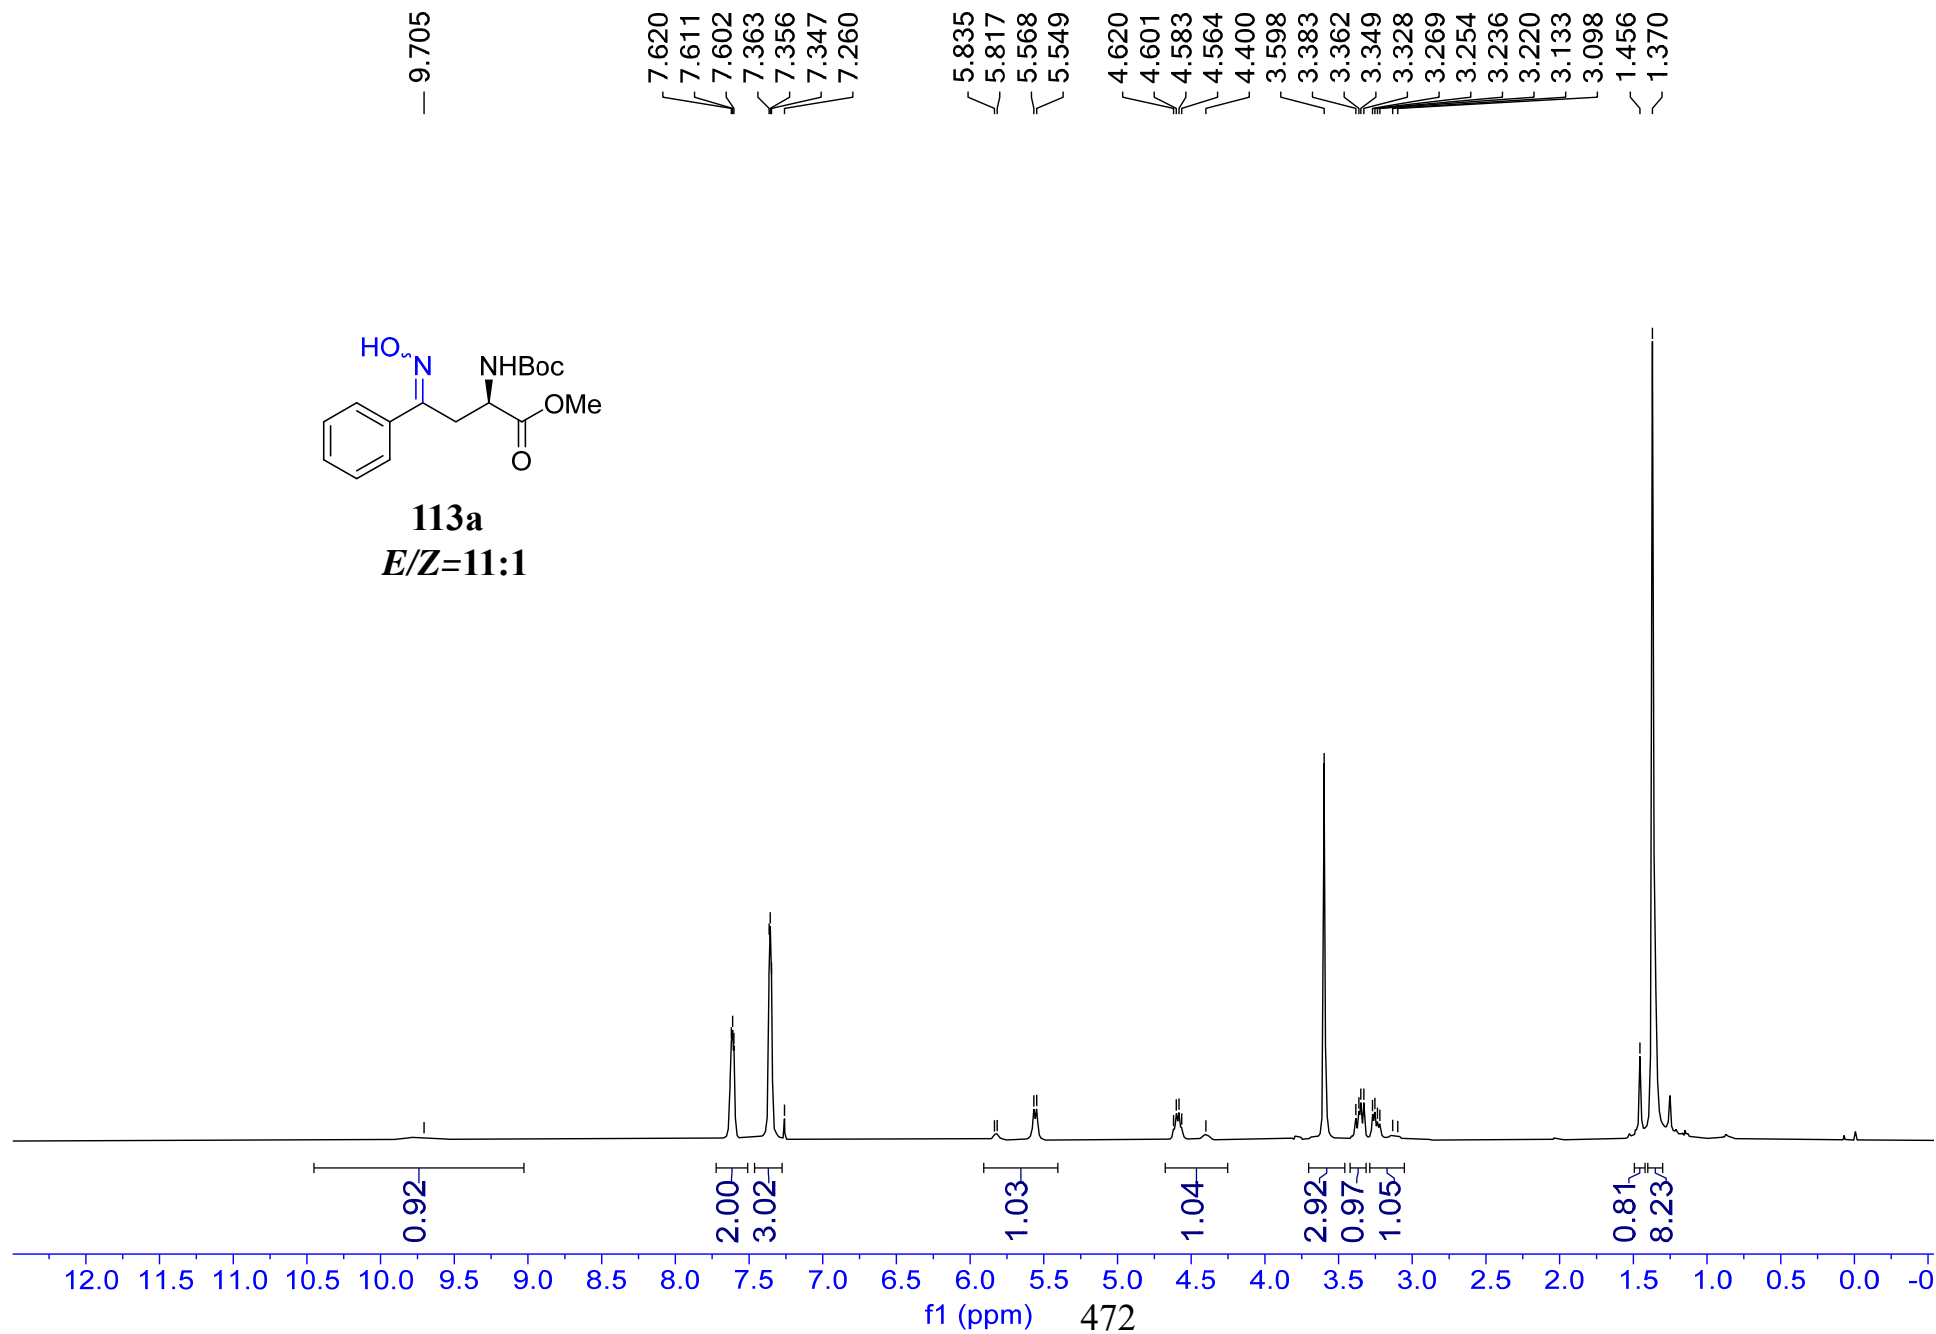

<sup>13</sup>C NMR 101 MHz, CDCl<sub>3</sub>

— 172.53

155.39  
155.28

135.17  
129.55  
128.70  
126.46

80.12  
77.48  
77.16  
76.84

52.49  
51.71

28.67  
28.35

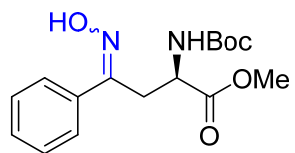

**113a**

*E/Z=11:1*

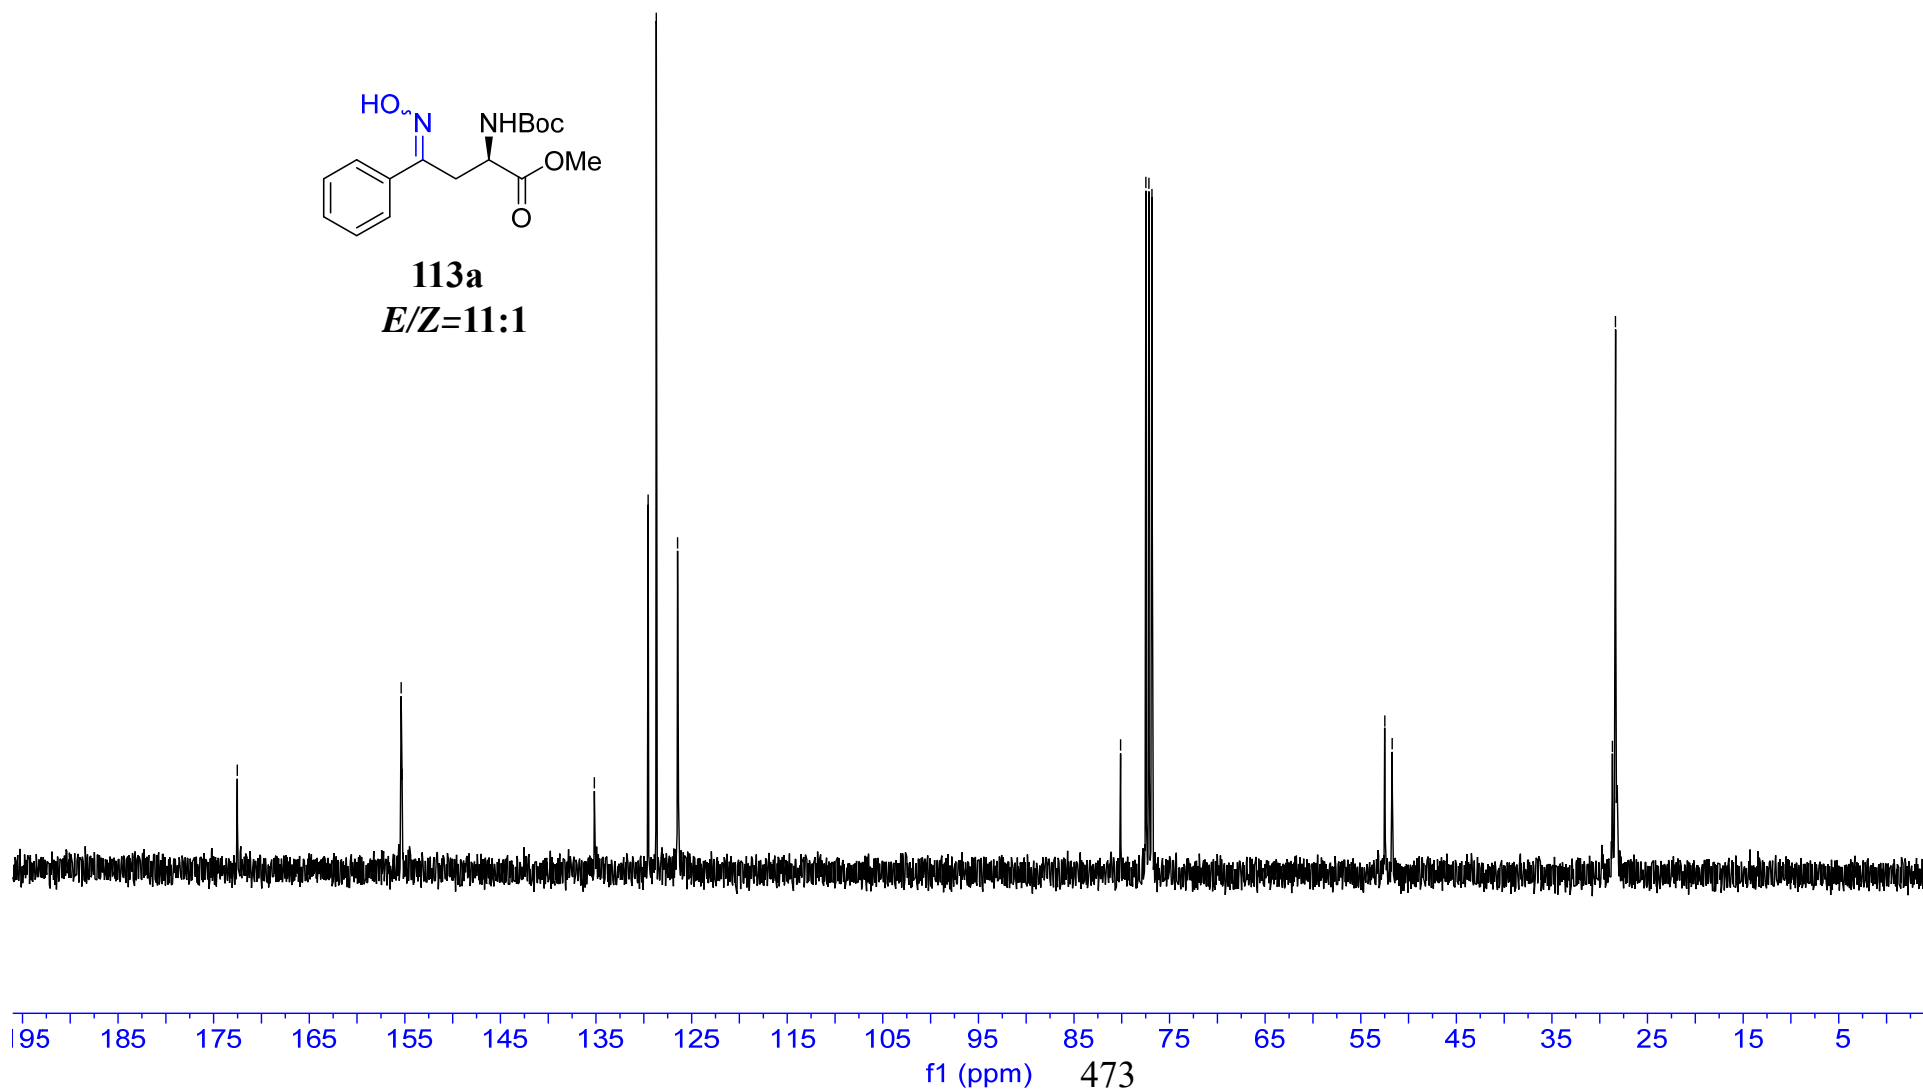

<sup>1</sup>H NMR, 400 MHz, CDCl<sub>3</sub>

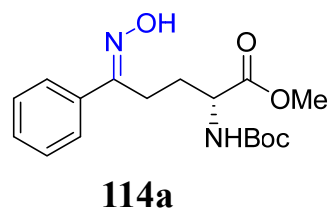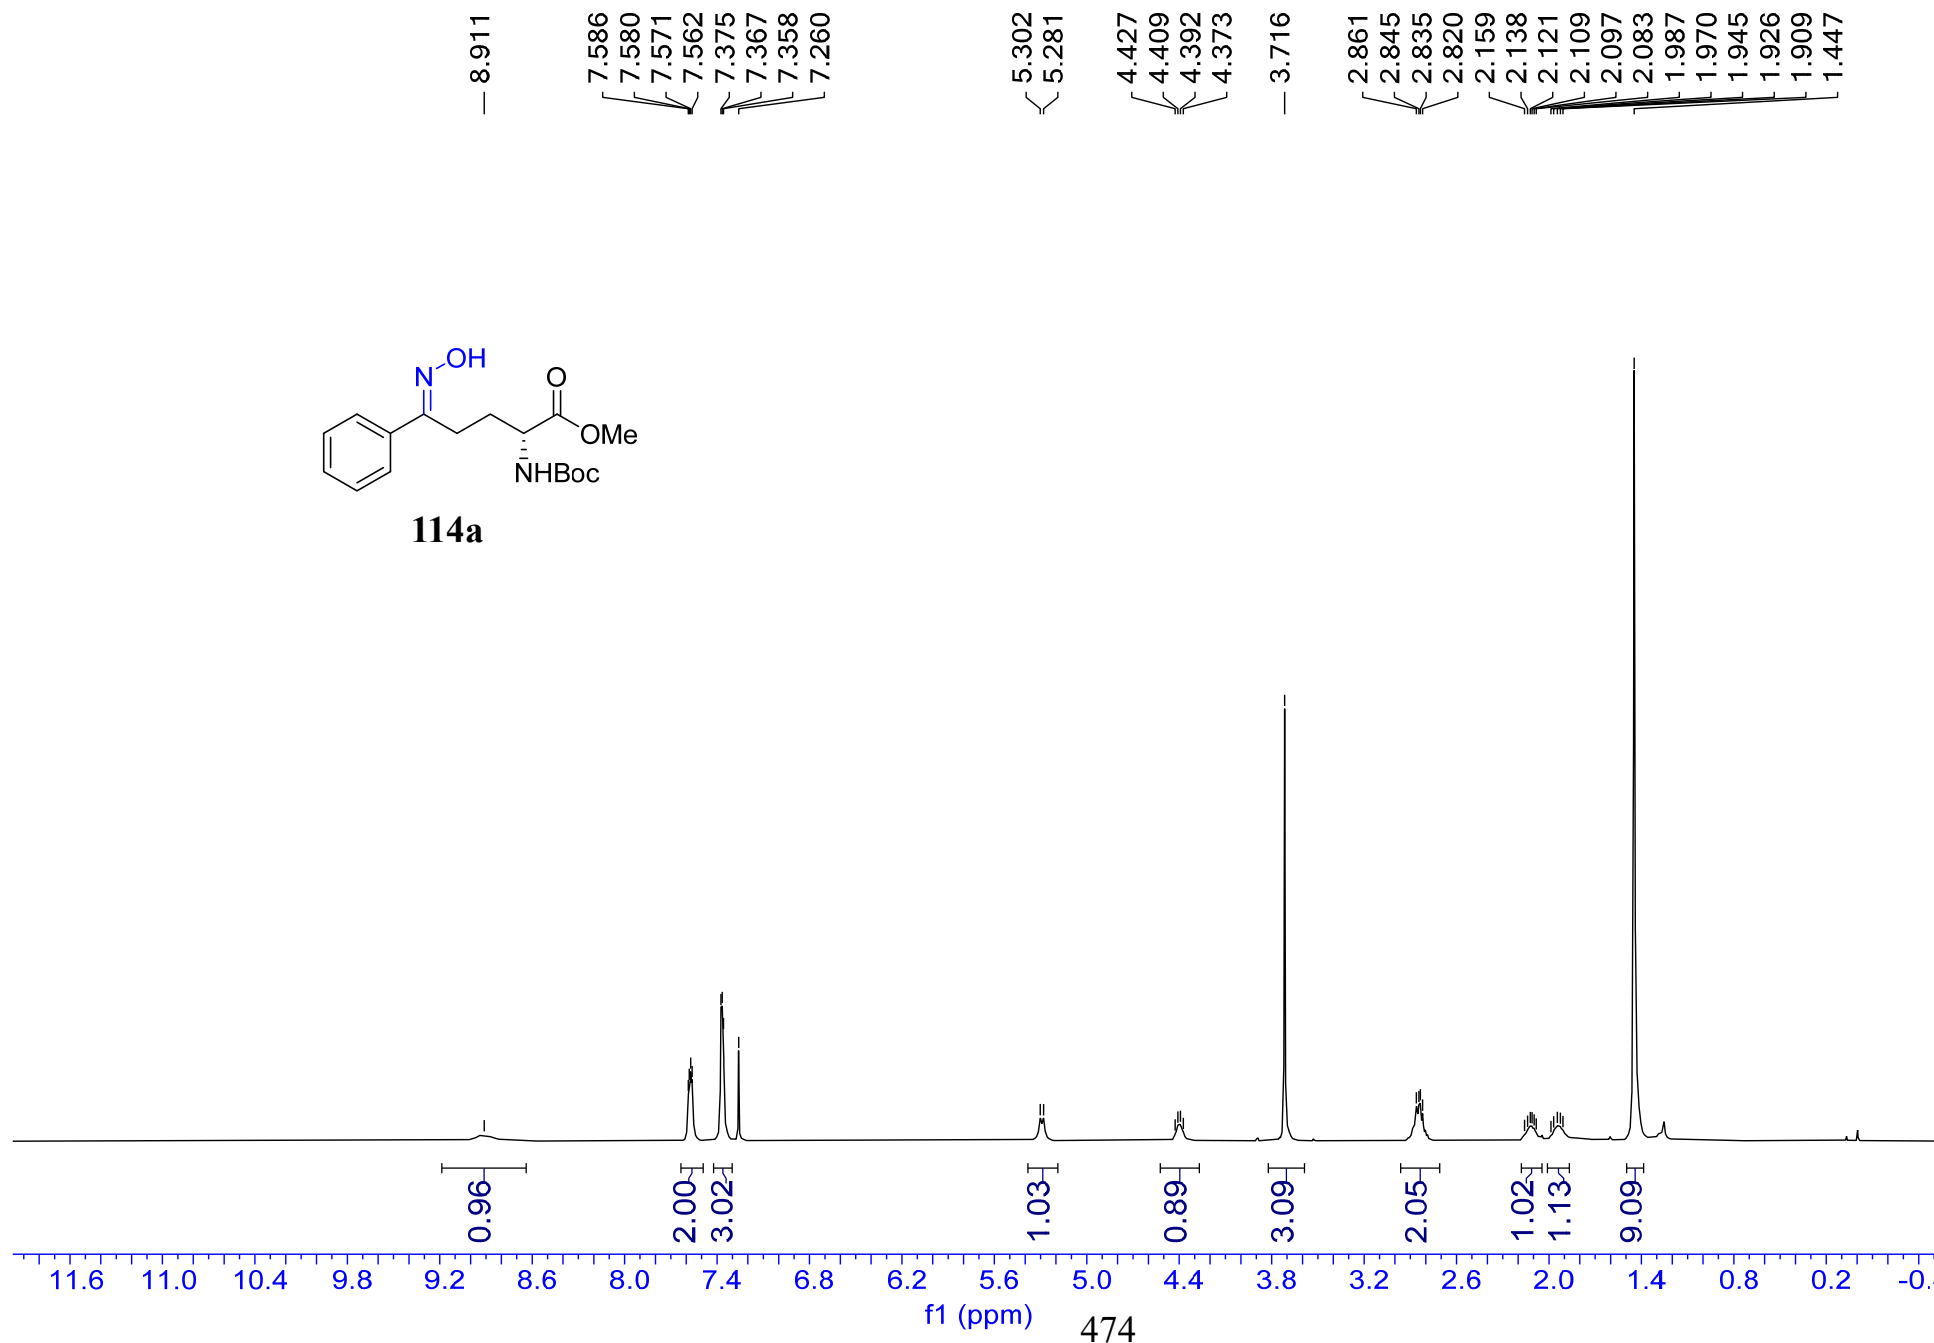

$^{13}\text{C}$  NMR 101 MHz,  $\text{CDCl}_3$

— 173.06

— 158.20  
— 155.64

— 135.33  
— 129.42  
— 128.70  
— 126.24

80.14  
77.48  
77.16  
76.85

53.59  
52.44

— 28.92  
— 28.40  
— 22.41

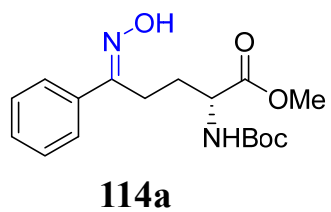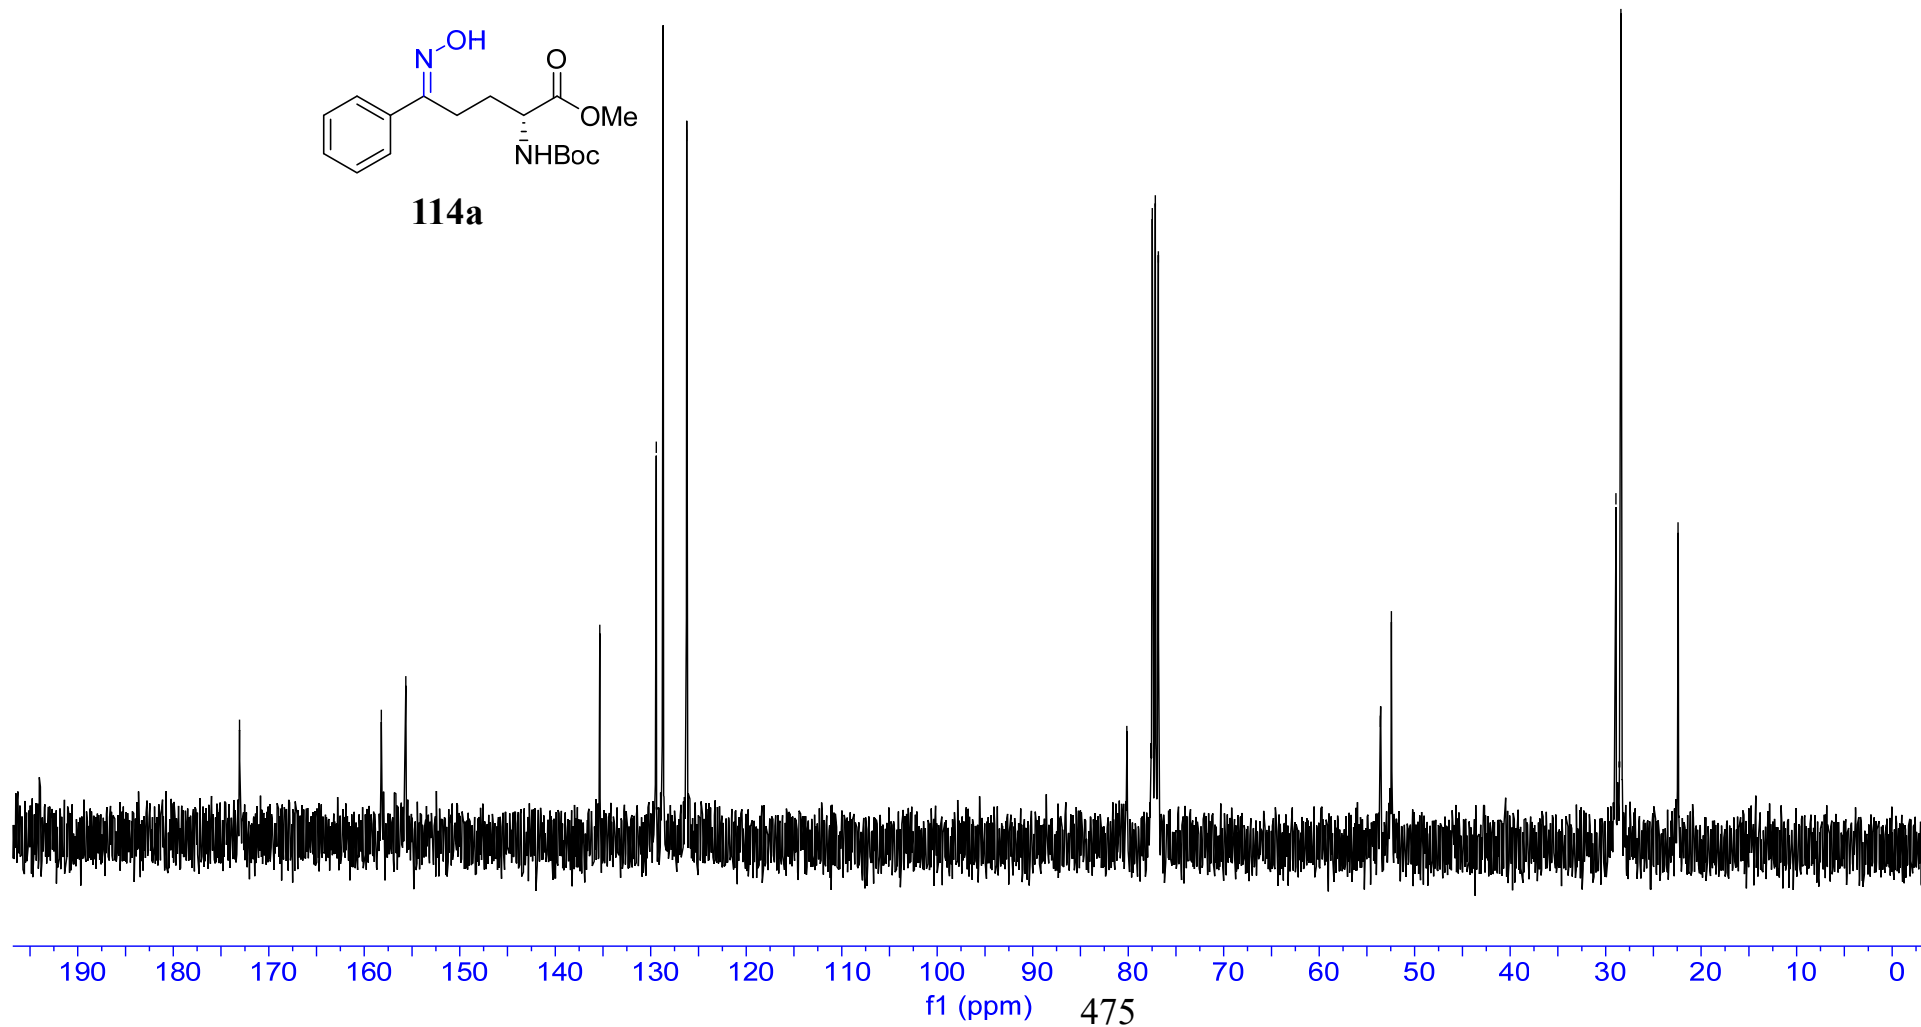

<sup>1</sup>H NMR, 400 MHz, CDCl<sub>3</sub>

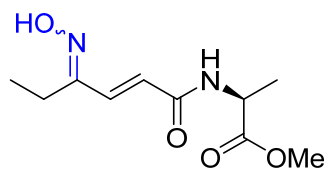

**115a**  
(2*E*,4*E*)/(2*E*,4*Z*)=3:1

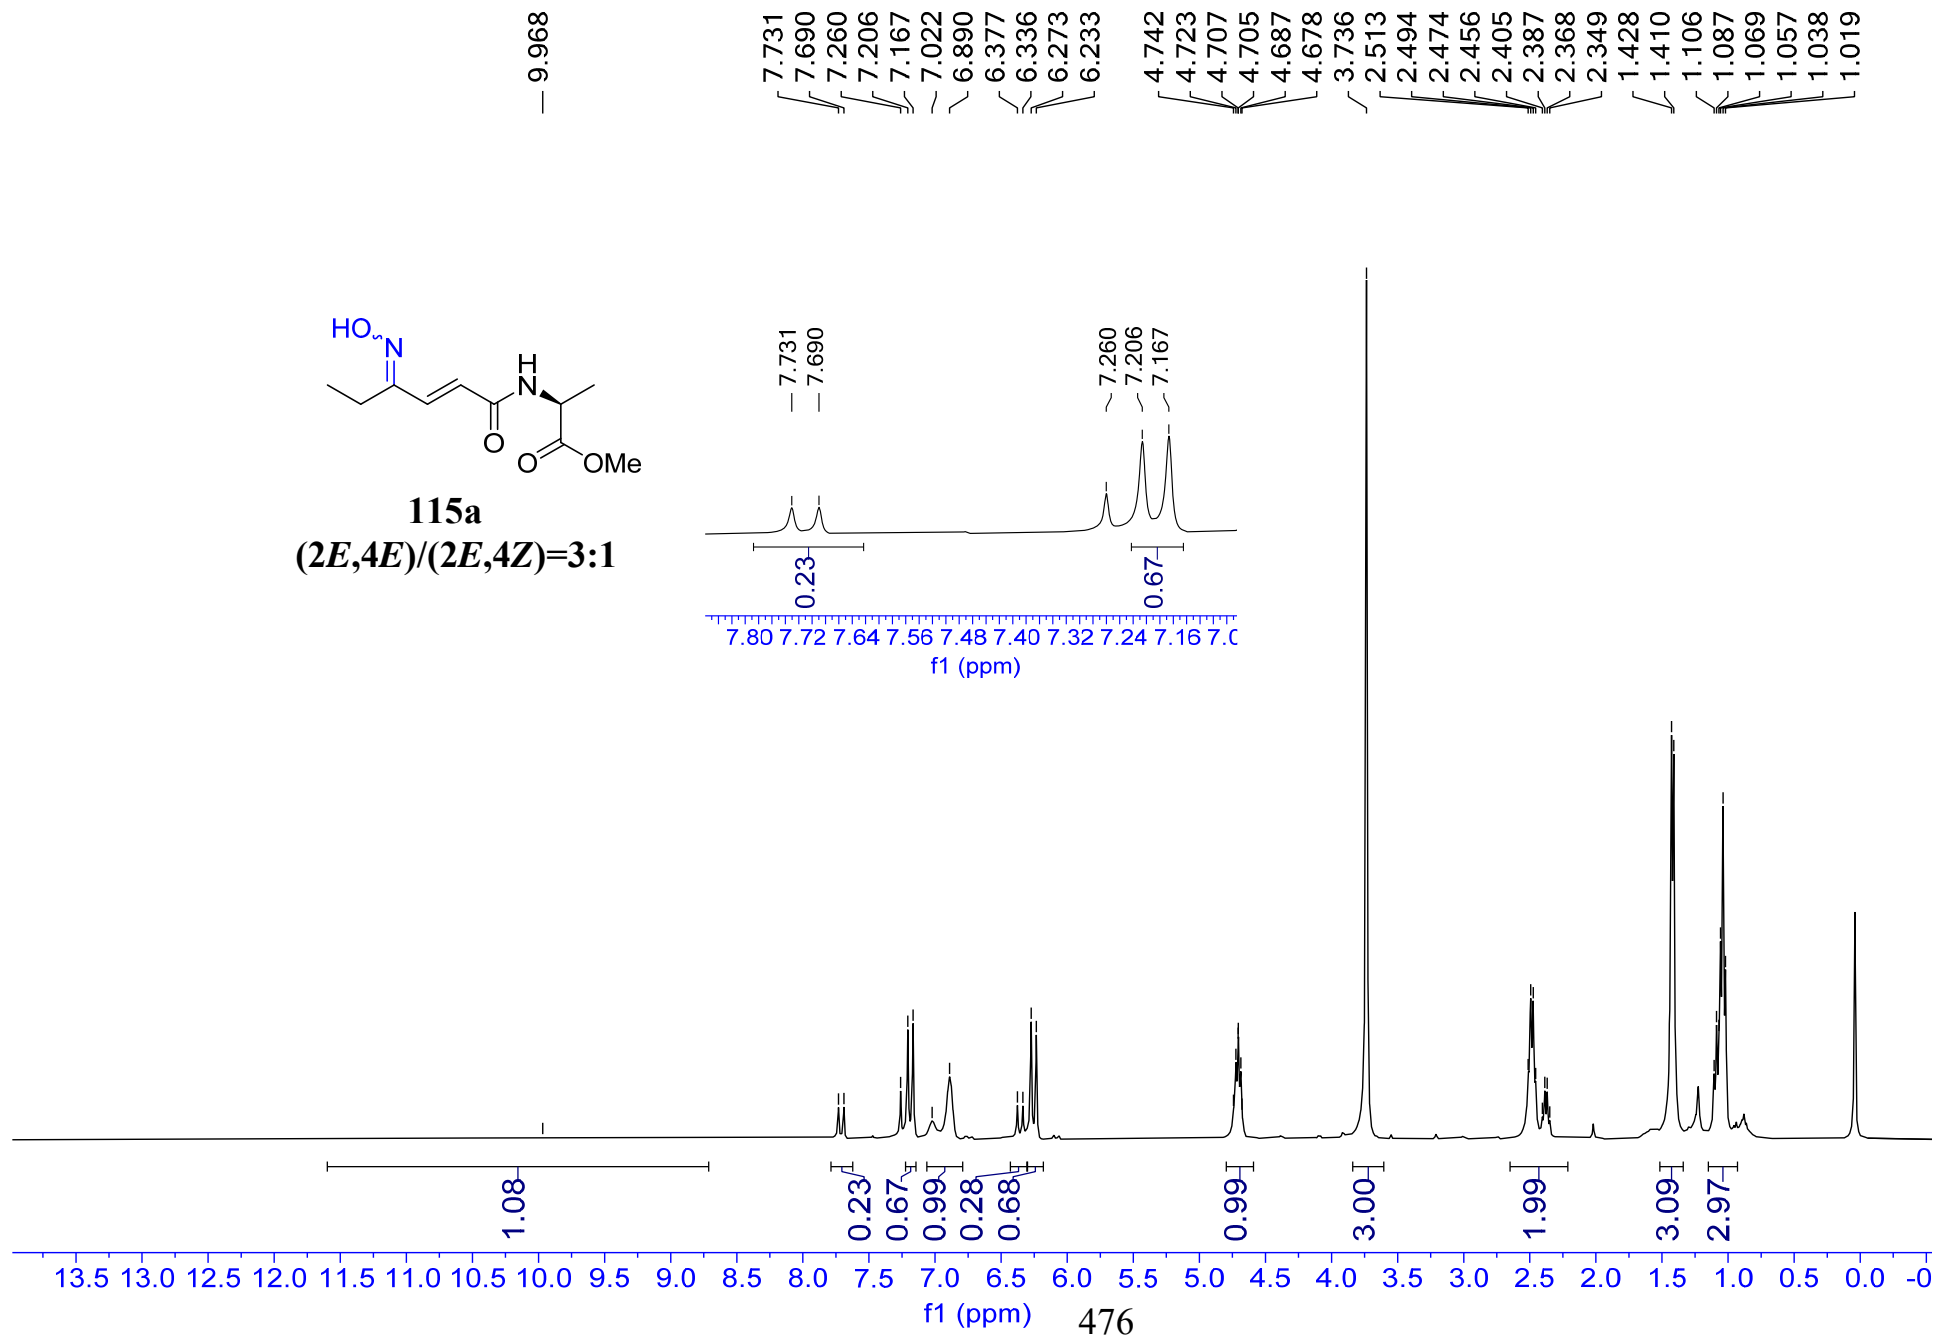



<sup>13</sup>C NMR 101 MHz, CDCl<sub>3</sub>

174.09  
174.00

165.46  
159.55  
155.13

137.82

127.76  
127.42  
124.07

77.48  
77.16  
76.84

52.73  
48.35  
48.29

24.62  
18.34  
18.27  
17.84  
11.69  
10.68

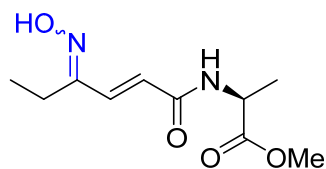

**115a**  
**(2E,4E)/(2E,4Z)=3:1**

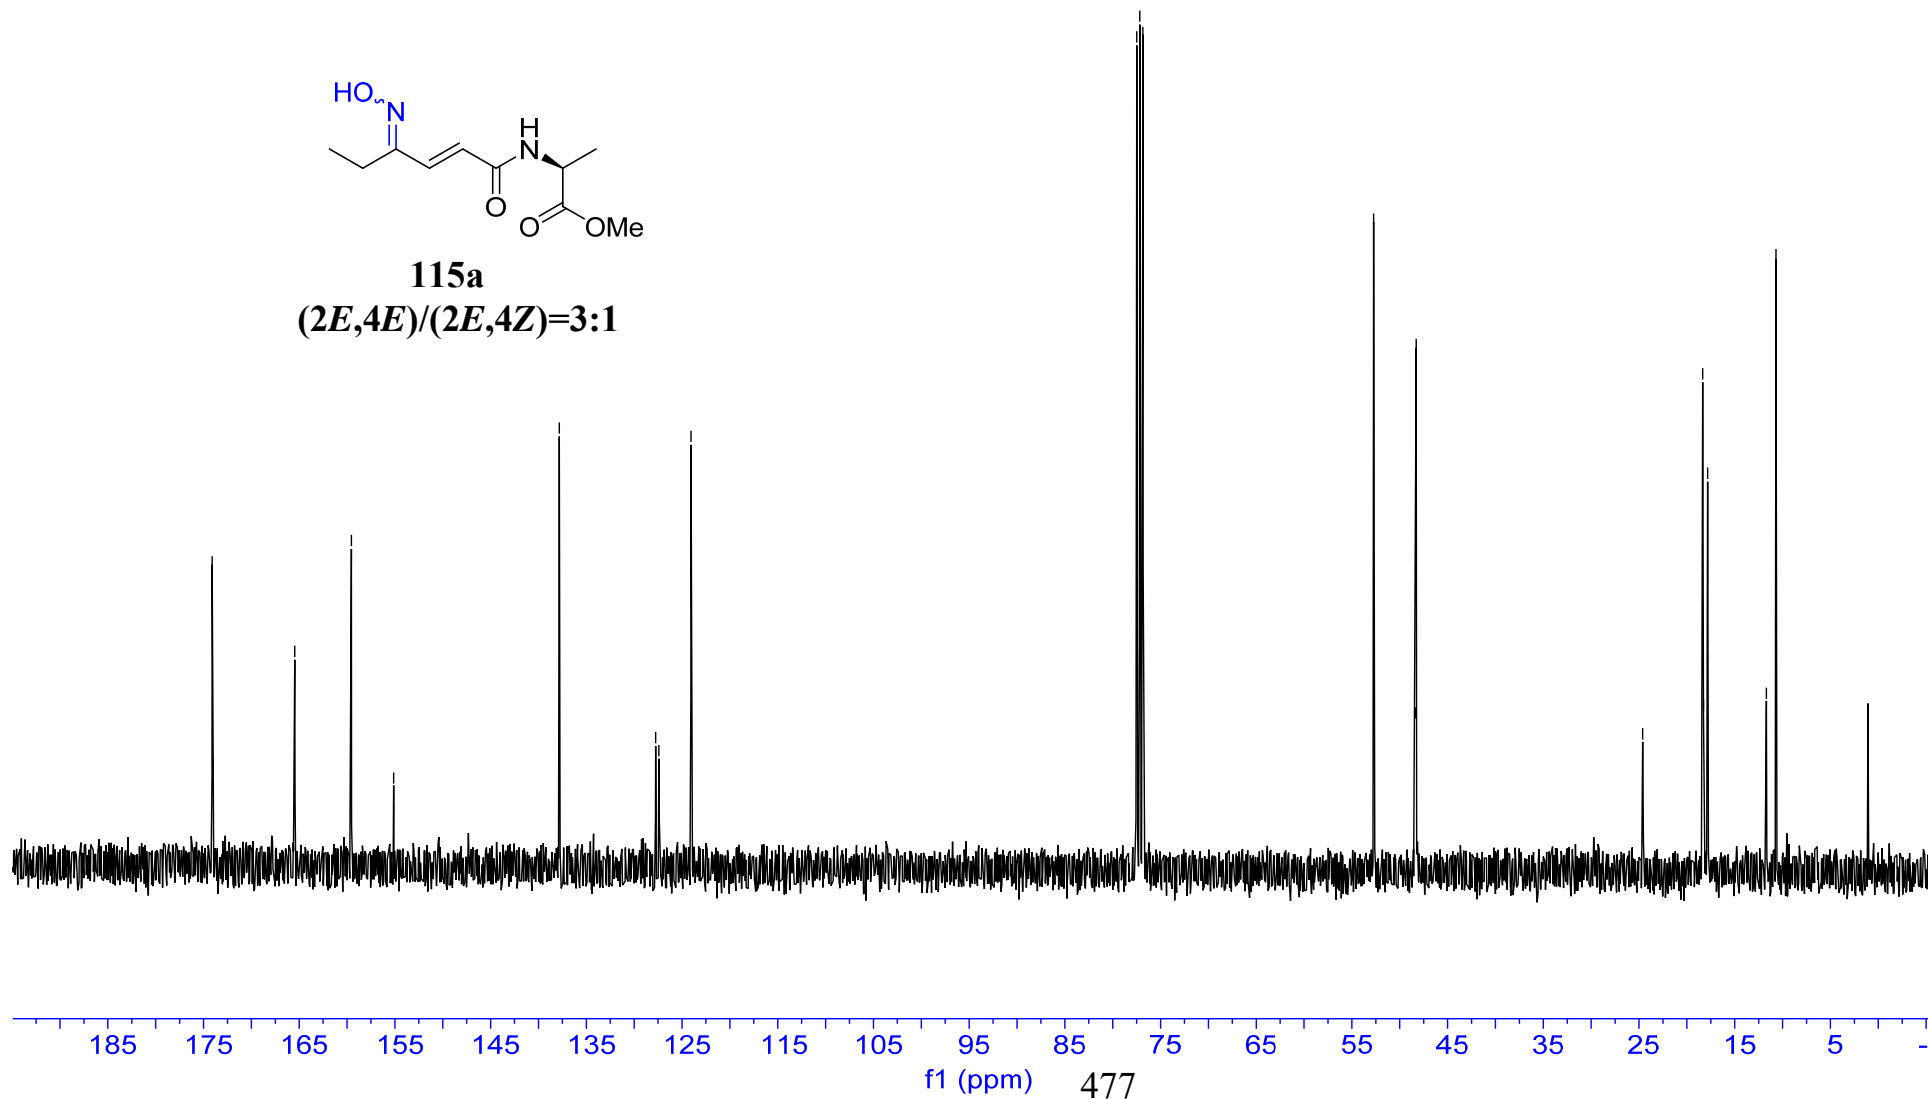

<sup>1</sup>H NMR, 400 MHz, CDCl<sub>3</sub>

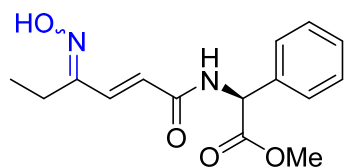

**116a**  
(2*E*,4*E*)/(2*E*,4*Z*)=3:1

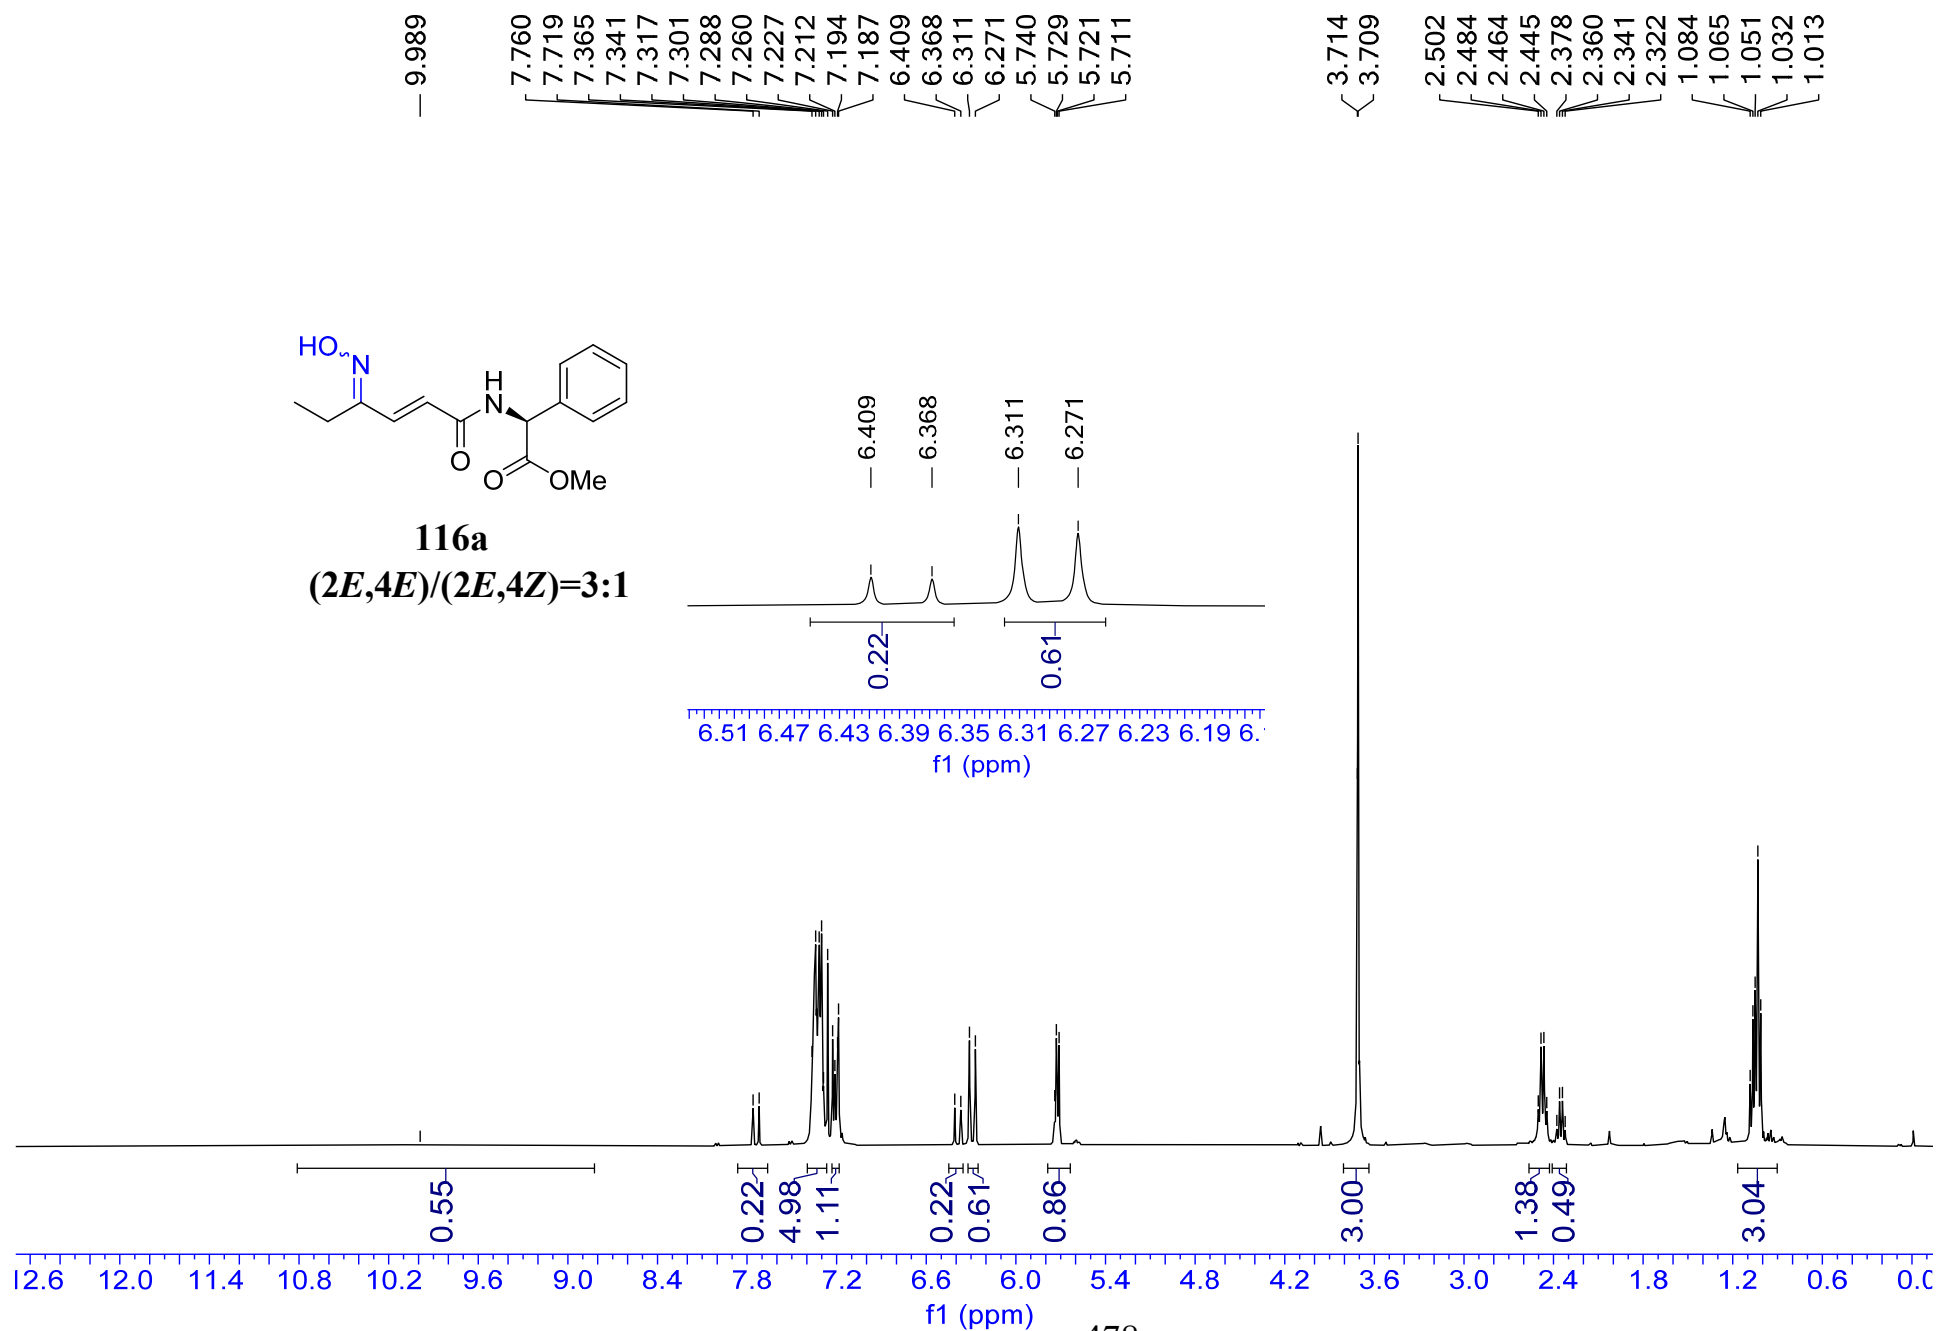

<sup>13</sup>C NMR 101 MHz, CDCl<sub>3</sub>

171.80  
171.73  
165.12  
159.55  
155.10  
138.17  
136.21  
136.13  
129.08  
128.71  
128.10  
127.47  
127.43  
127.11  
123.79

77.48  
77.16  
76.84

56.66  
56.60  
53.03

24.62  
17.85  
11.67  
10.68

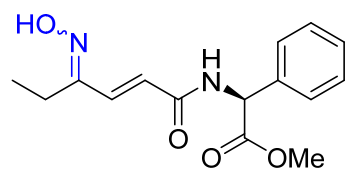

**116a**  
**(2*E*,4*E*)/(2*E*,4*Z*)=3:1**

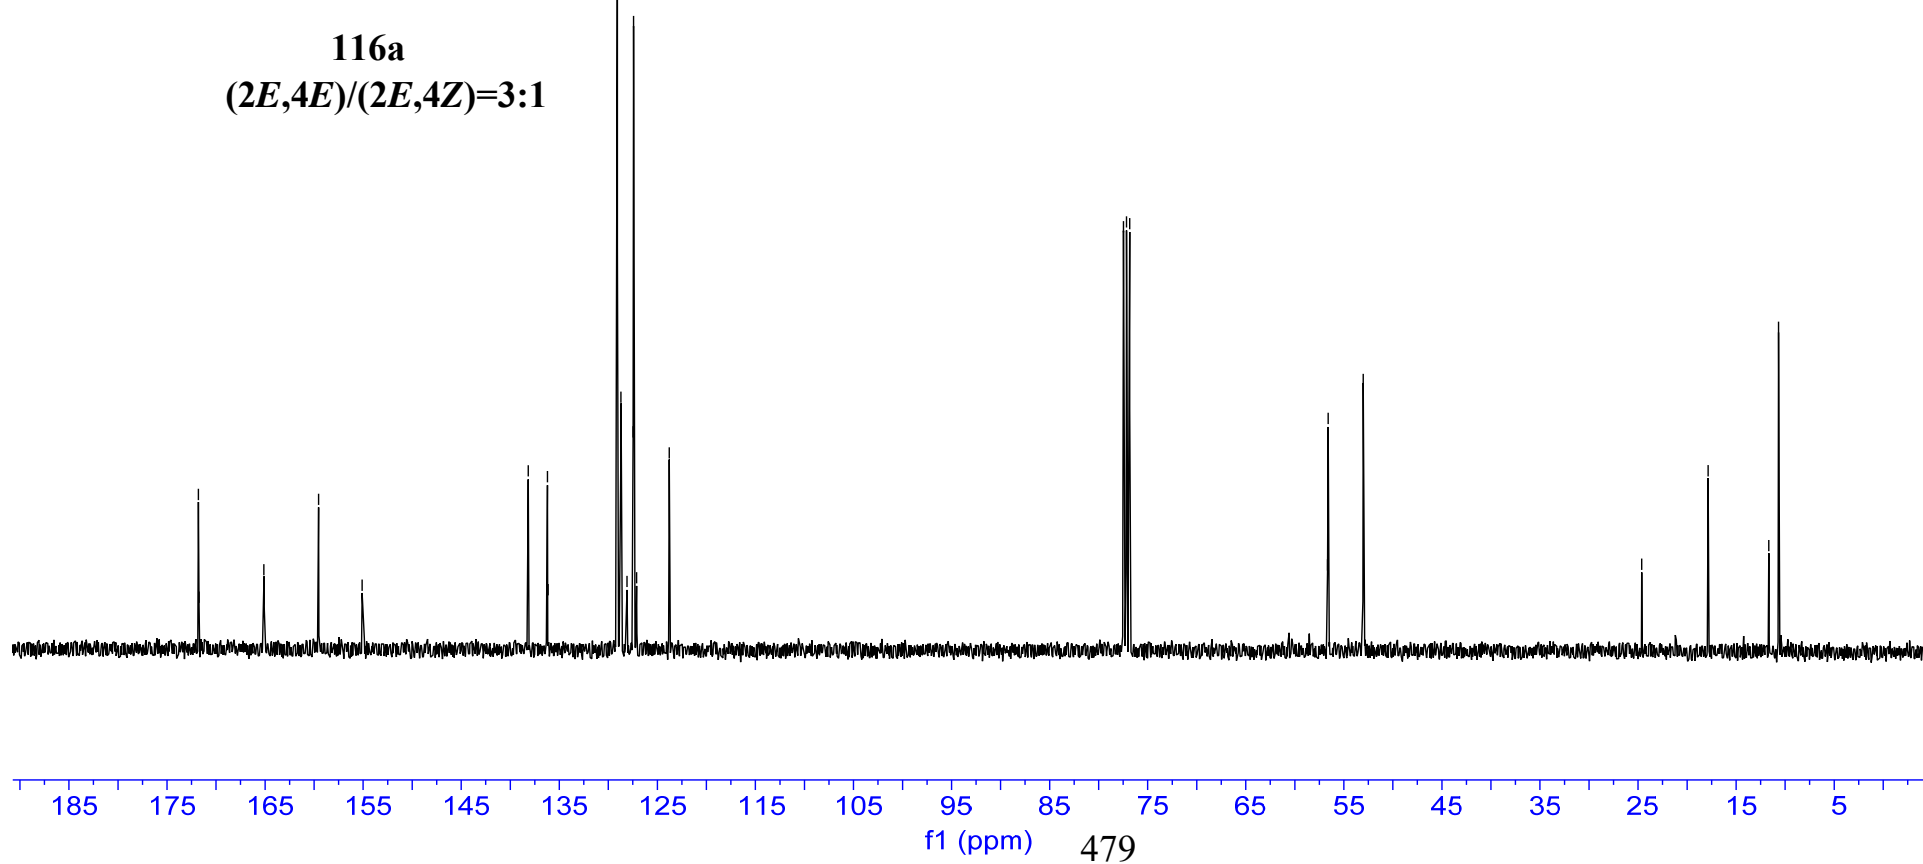

<sup>1</sup>H NMR, 400 MHz, CDCl<sub>3</sub>

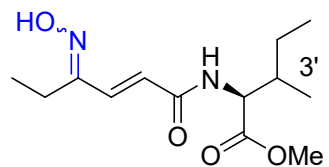

**117a**  
(2*E*,4*E*)/(2*E*,4*Z*)=2.4:1

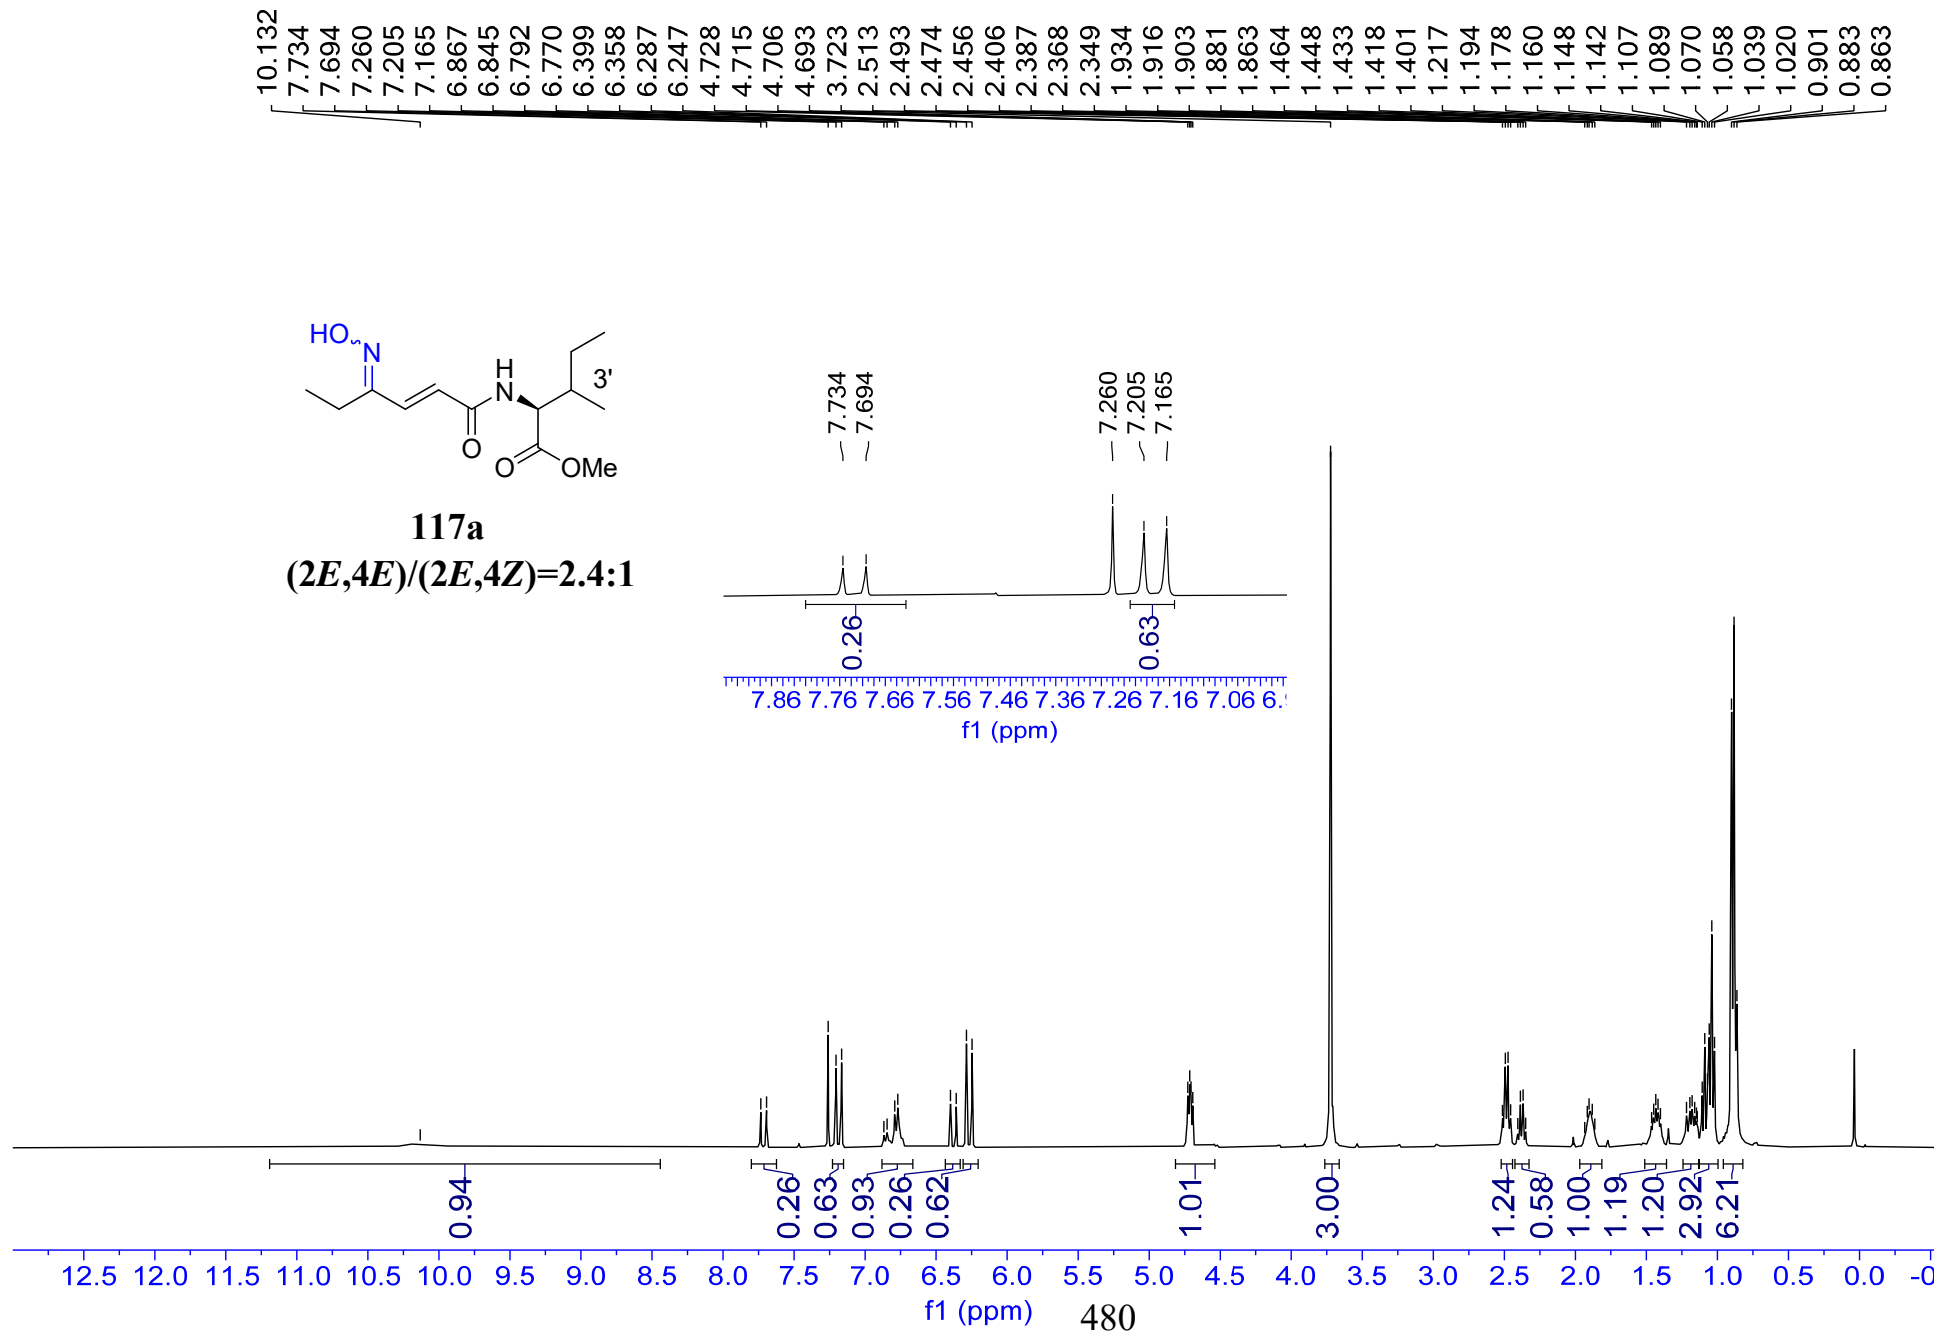

<sup>13</sup>C NMR 101 MHz, CDCl<sub>3</sub>

173.28  
173.12

165.72  
159.53  
155.06

137.80

127.85  
127.47  
124.18

77.48  
77.16  
76.85

56.77  
56.70  
52.38

38.10

25.35  
24.70  
17.86  
15.51  
11.72  
11.58  
10.70

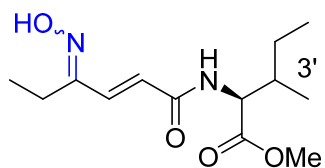

**117a**

**(2*E*,4*E*)/(2*E*,4*Z*)=2.4:1**

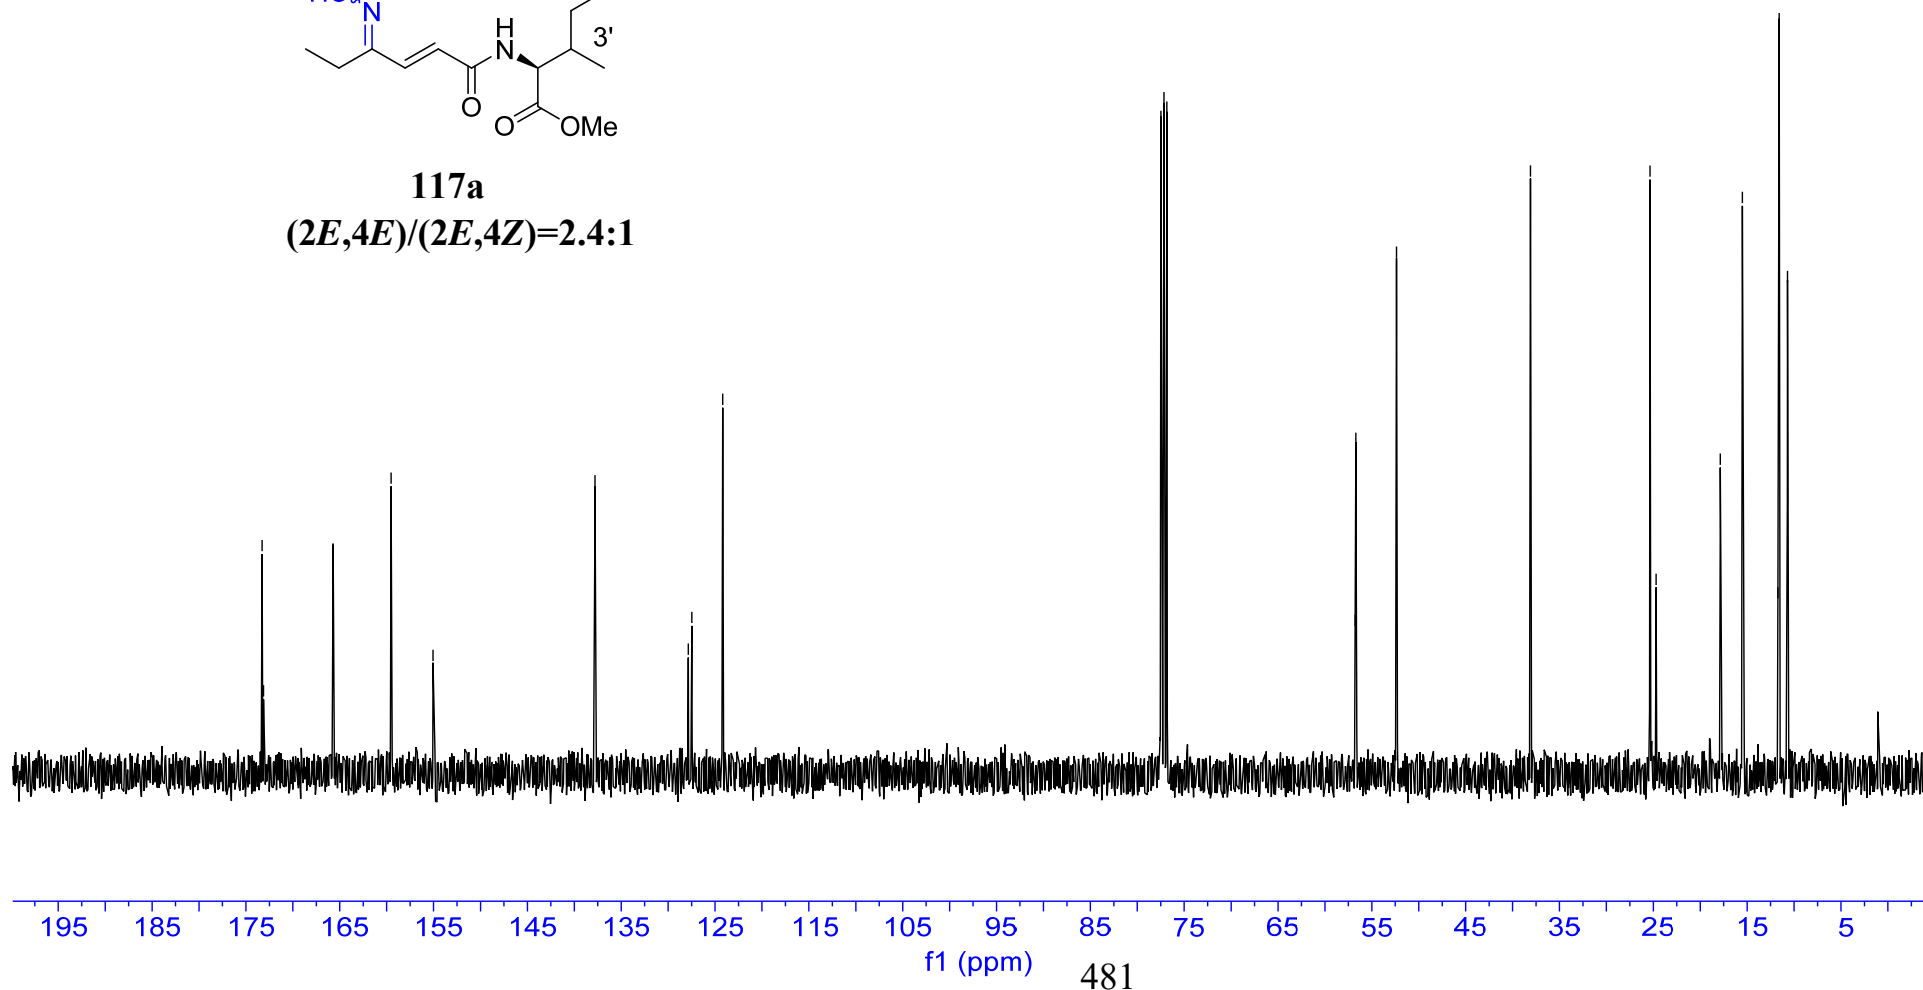

<sup>1</sup>H NMR, 400 MHz, CDCl<sub>3</sub>

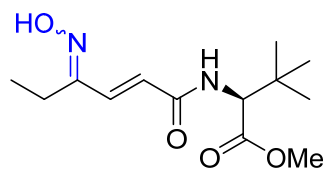

**118a**  
(2*E*,4*E*)/(2*E*,4*Z*)=3:1

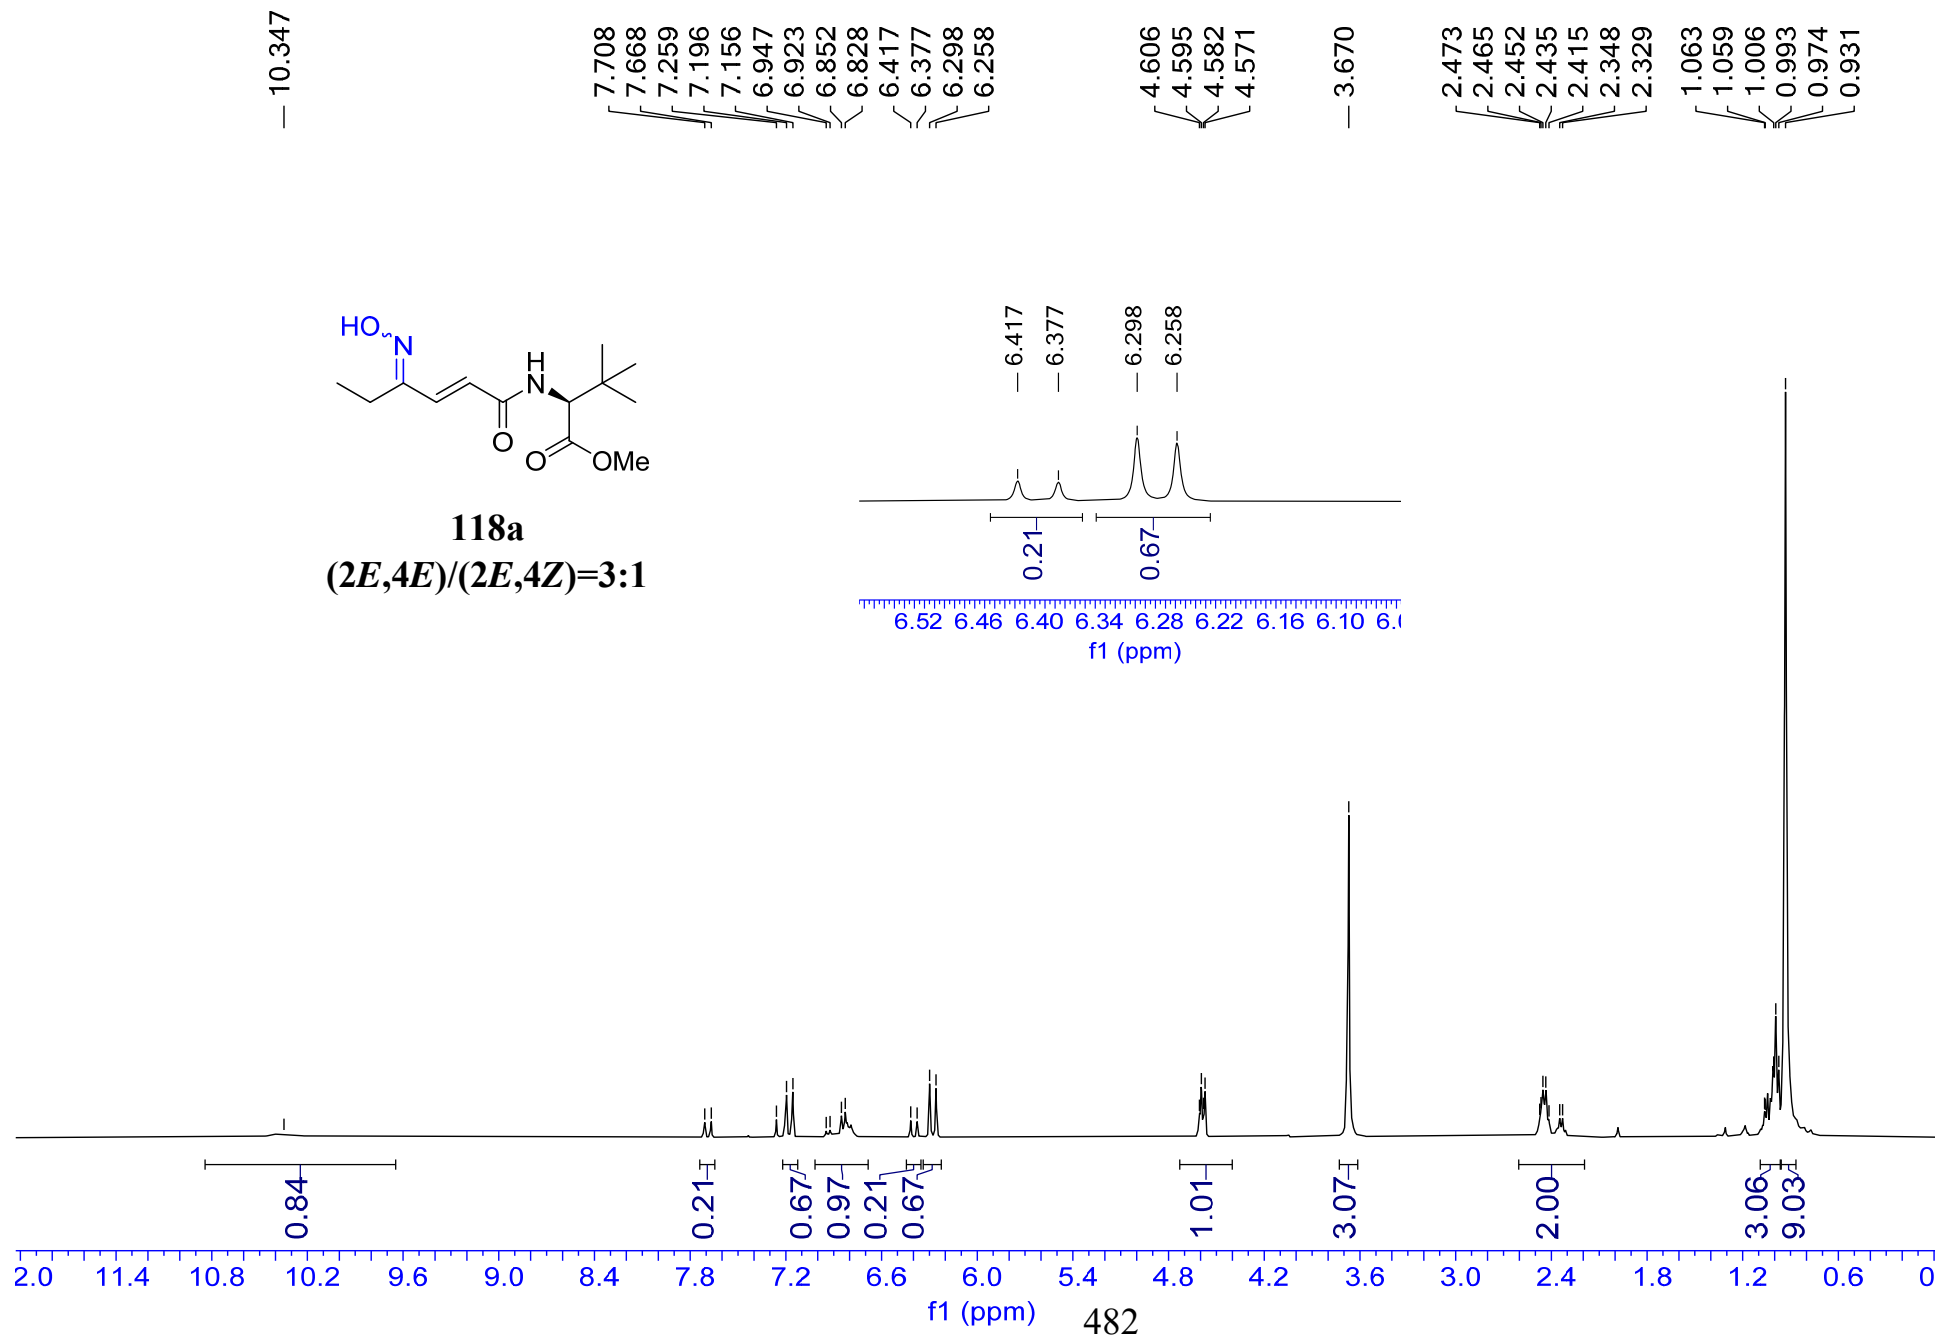

<sup>13</sup>C NMR 101 MHz, CDCl<sub>3</sub>

172.65  
172.53  
165.78  
165.75  
165.71  
165.69  
159.34  
154.86

— 137.91

127.93  
127.34  
123.99

77.48  
77.16  
76.84

— 60.20

— 52.00

34.95  
34.93  
34.91  
34.89

26.59

24.62

17.76

11.71

10.62

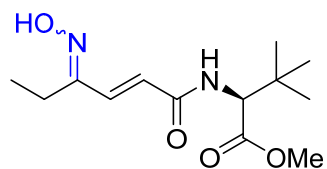

**118a**  
**(2E,4E)/(2E,4Z)=3:1**

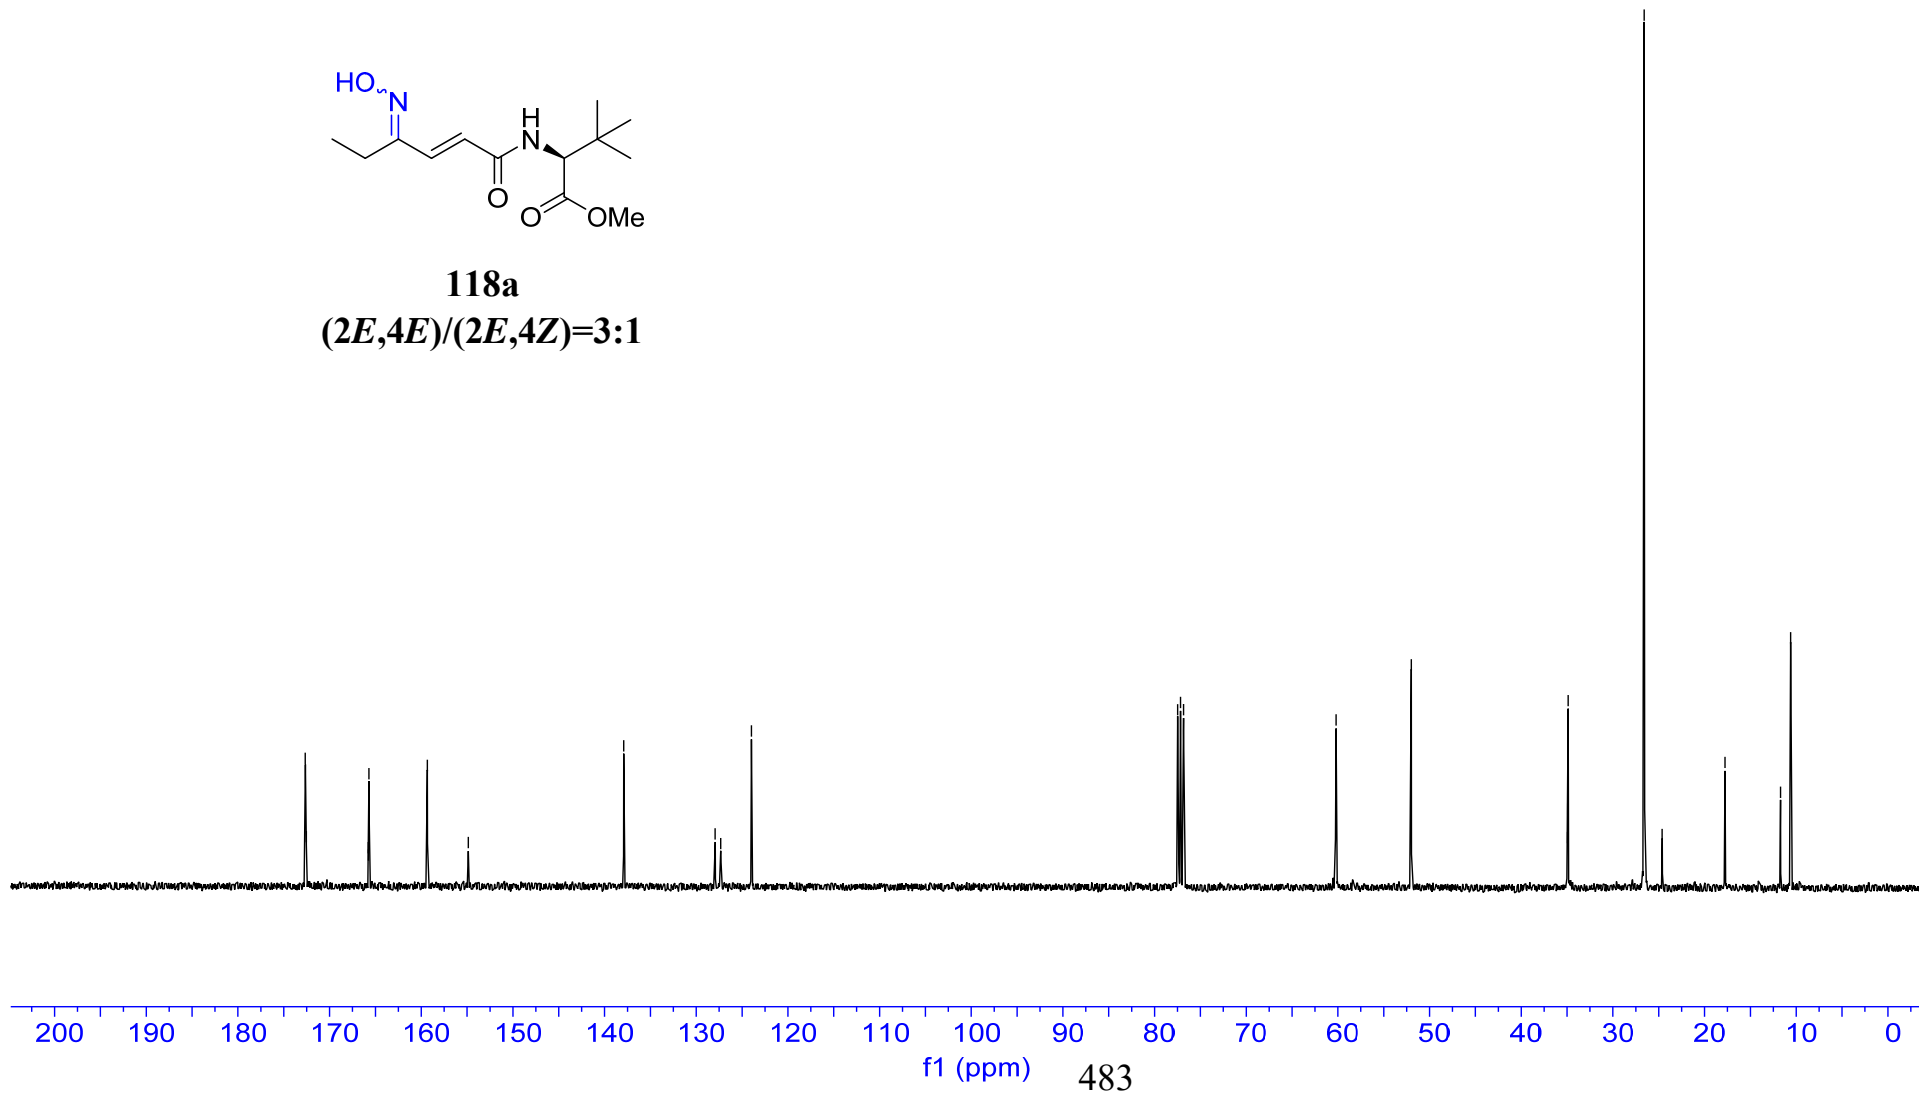

<sup>1</sup>H NMR, 400 MHz, CDCl<sub>3</sub>

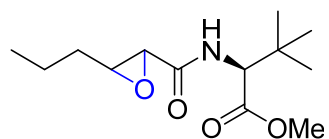

**118b**  
dr = 4:1

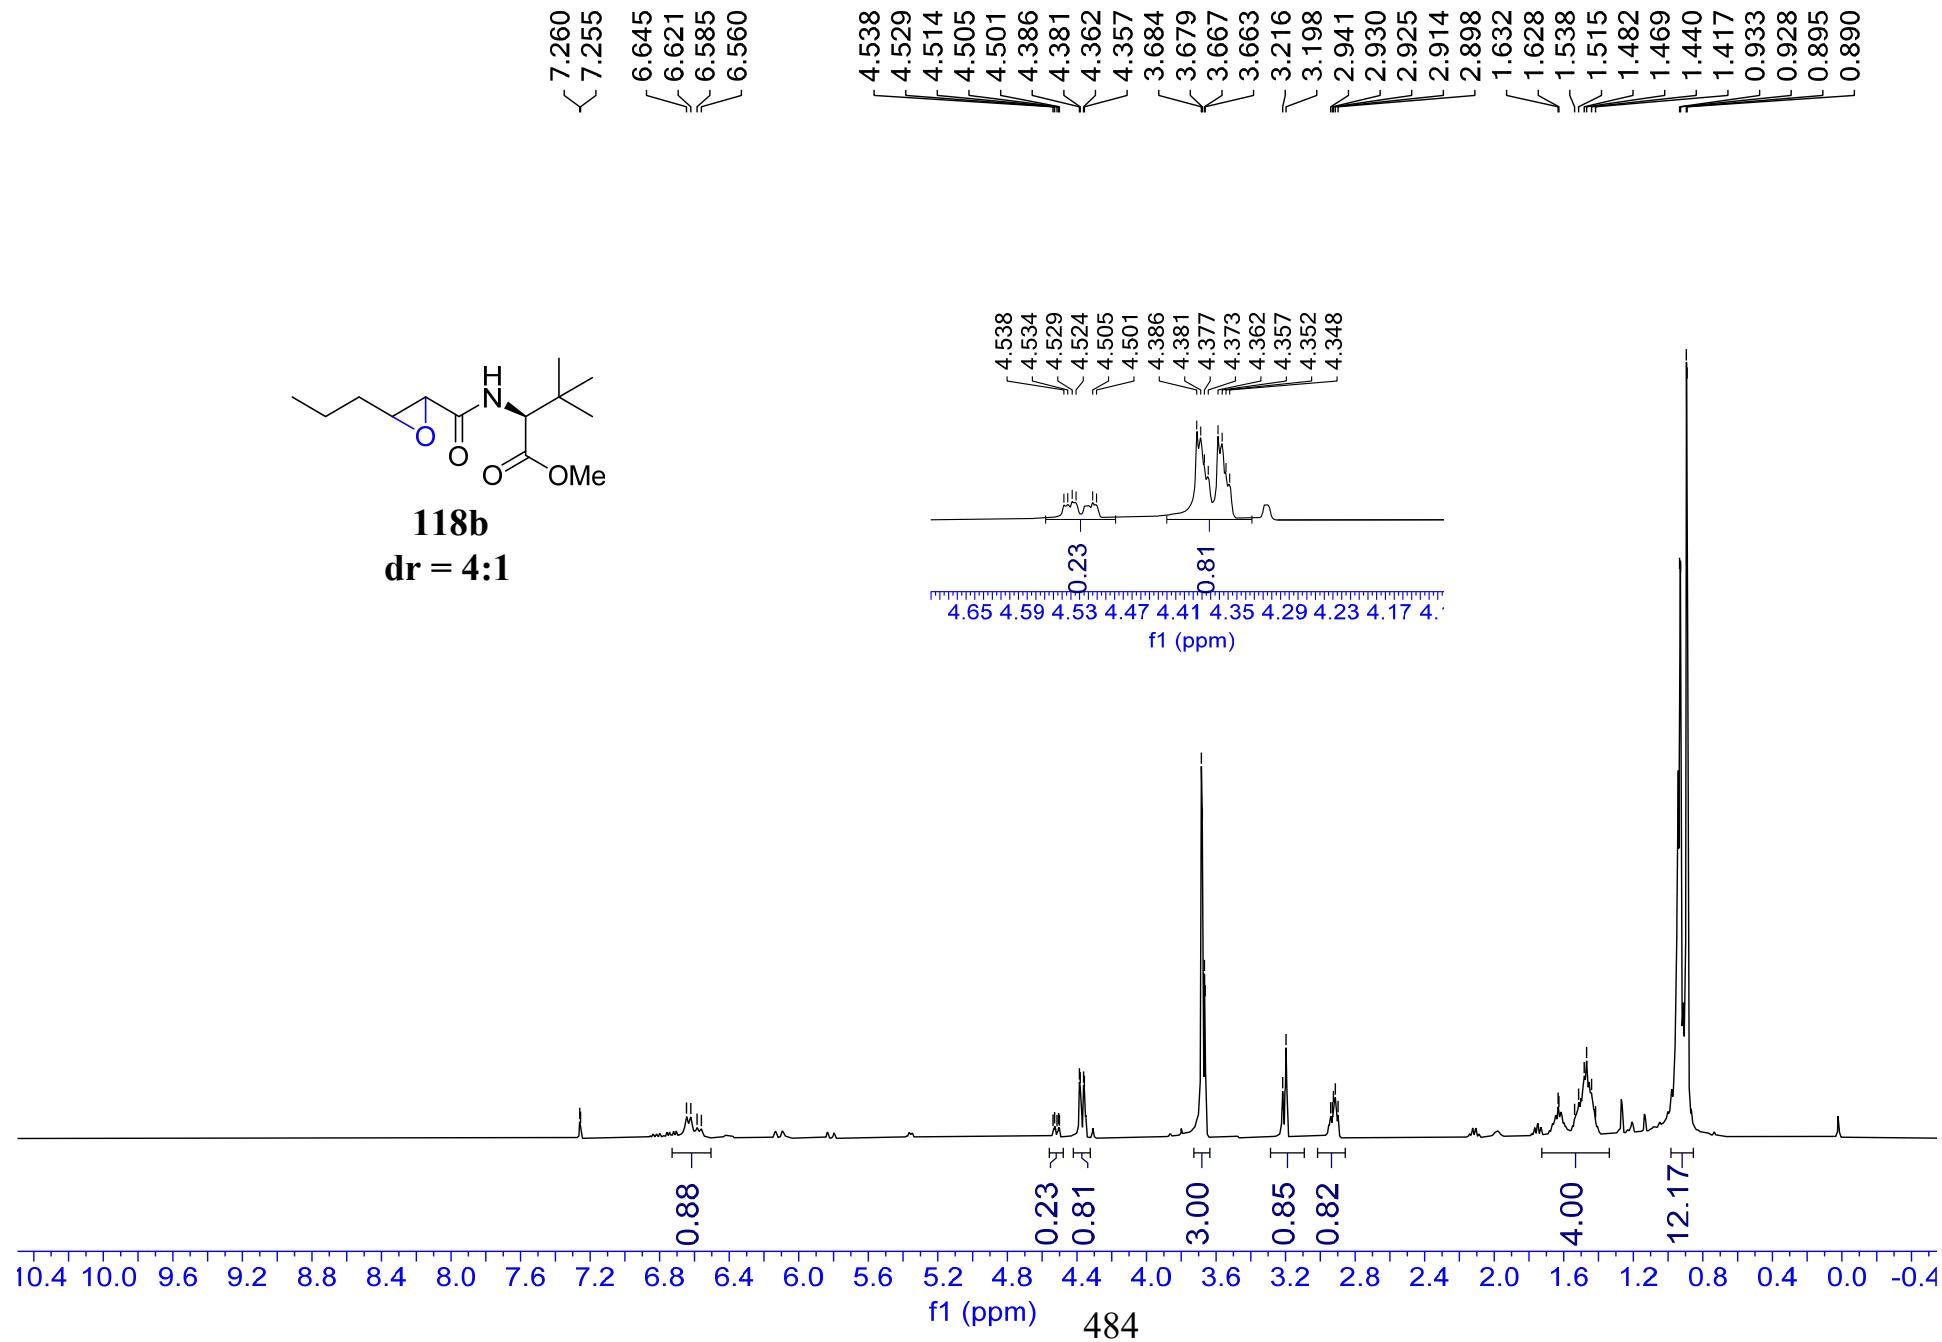



$^{13}\text{C}$  NMR 101 MHz,  $\text{CDCl}_3$

171.71  
171.32  
168.51

77.48  
77.16  
76.85

59.78  
59.45  
59.18  
55.31  
51.94

34.90  
34.62  
33.73  
26.61  
26.55  
26.52  
19.02  
13.85

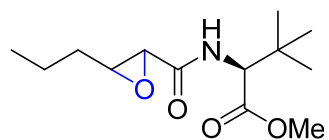

**118b**  
**dr = 4:1**

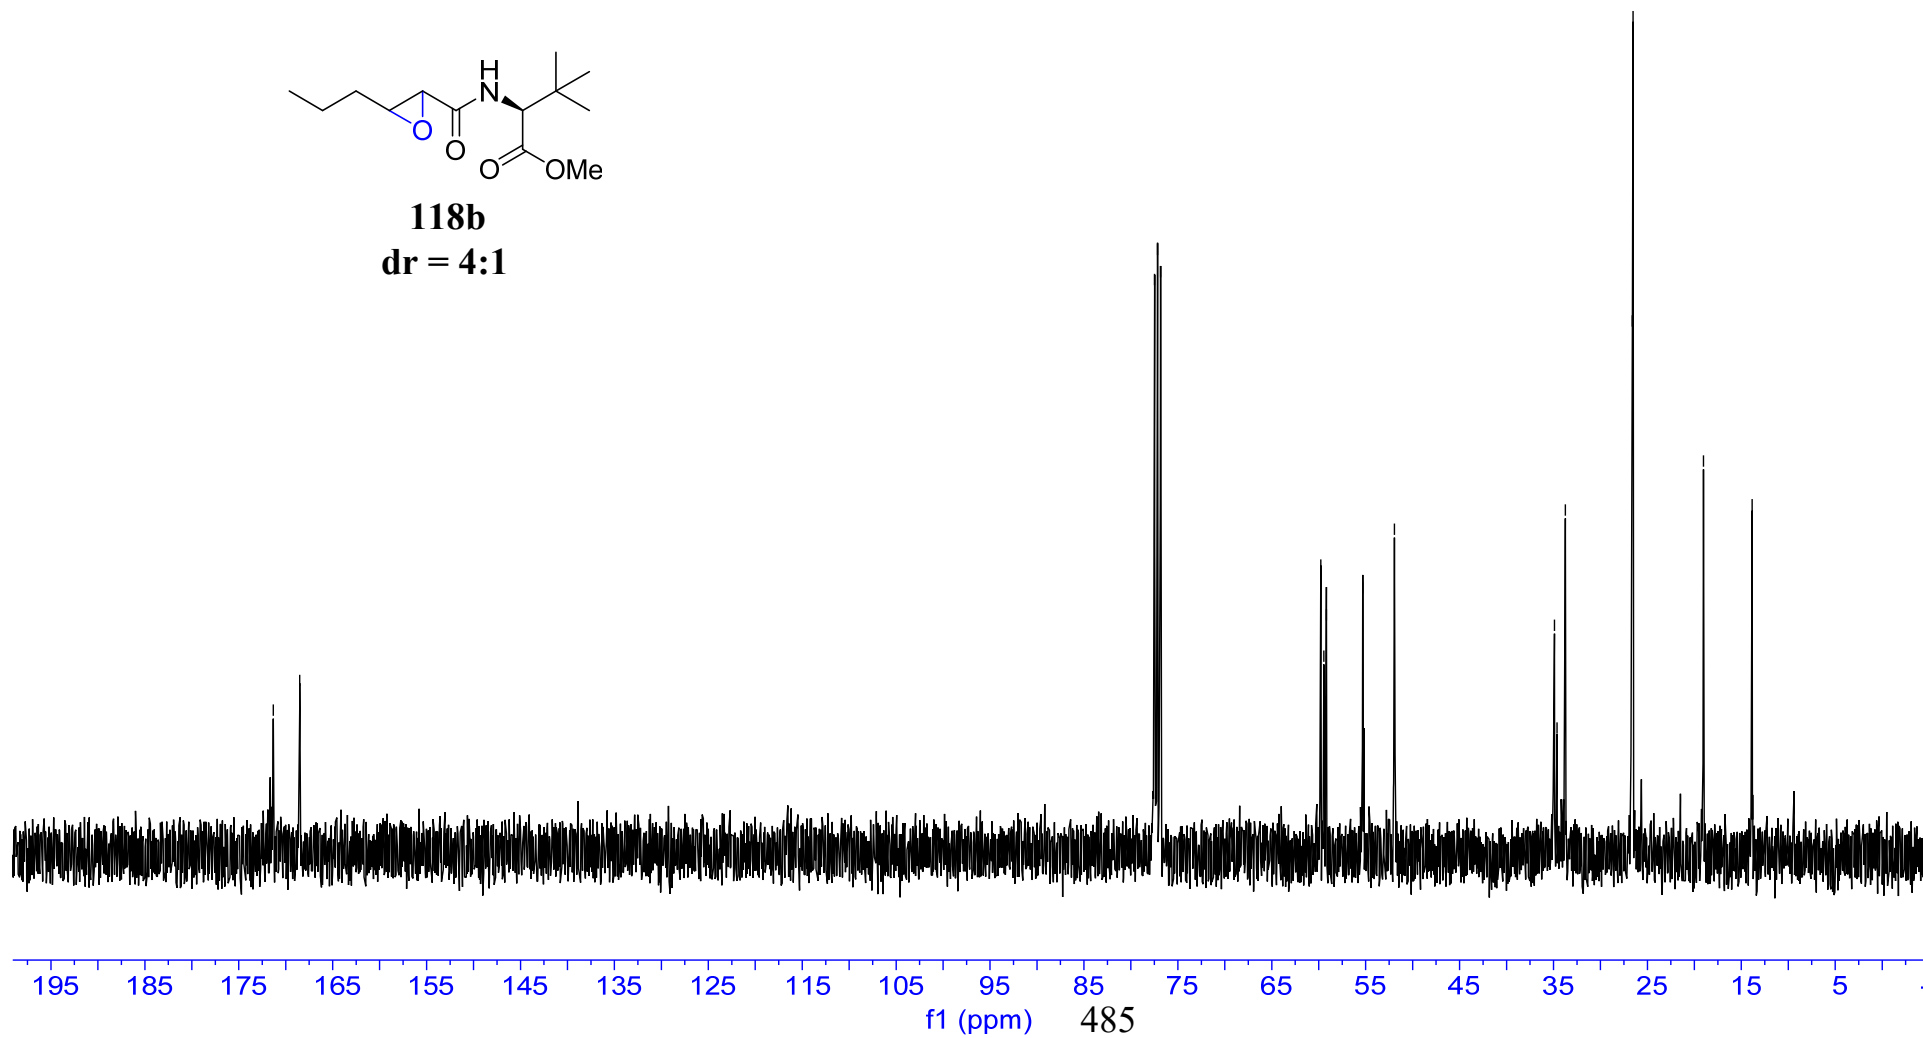

<sup>1</sup>H NMR, 400 MHz, CDCl<sub>3</sub>

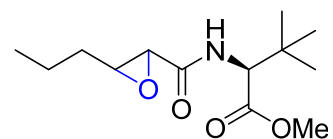

118b with (2*S*, 2*S'*)-C2  
dr >99:1

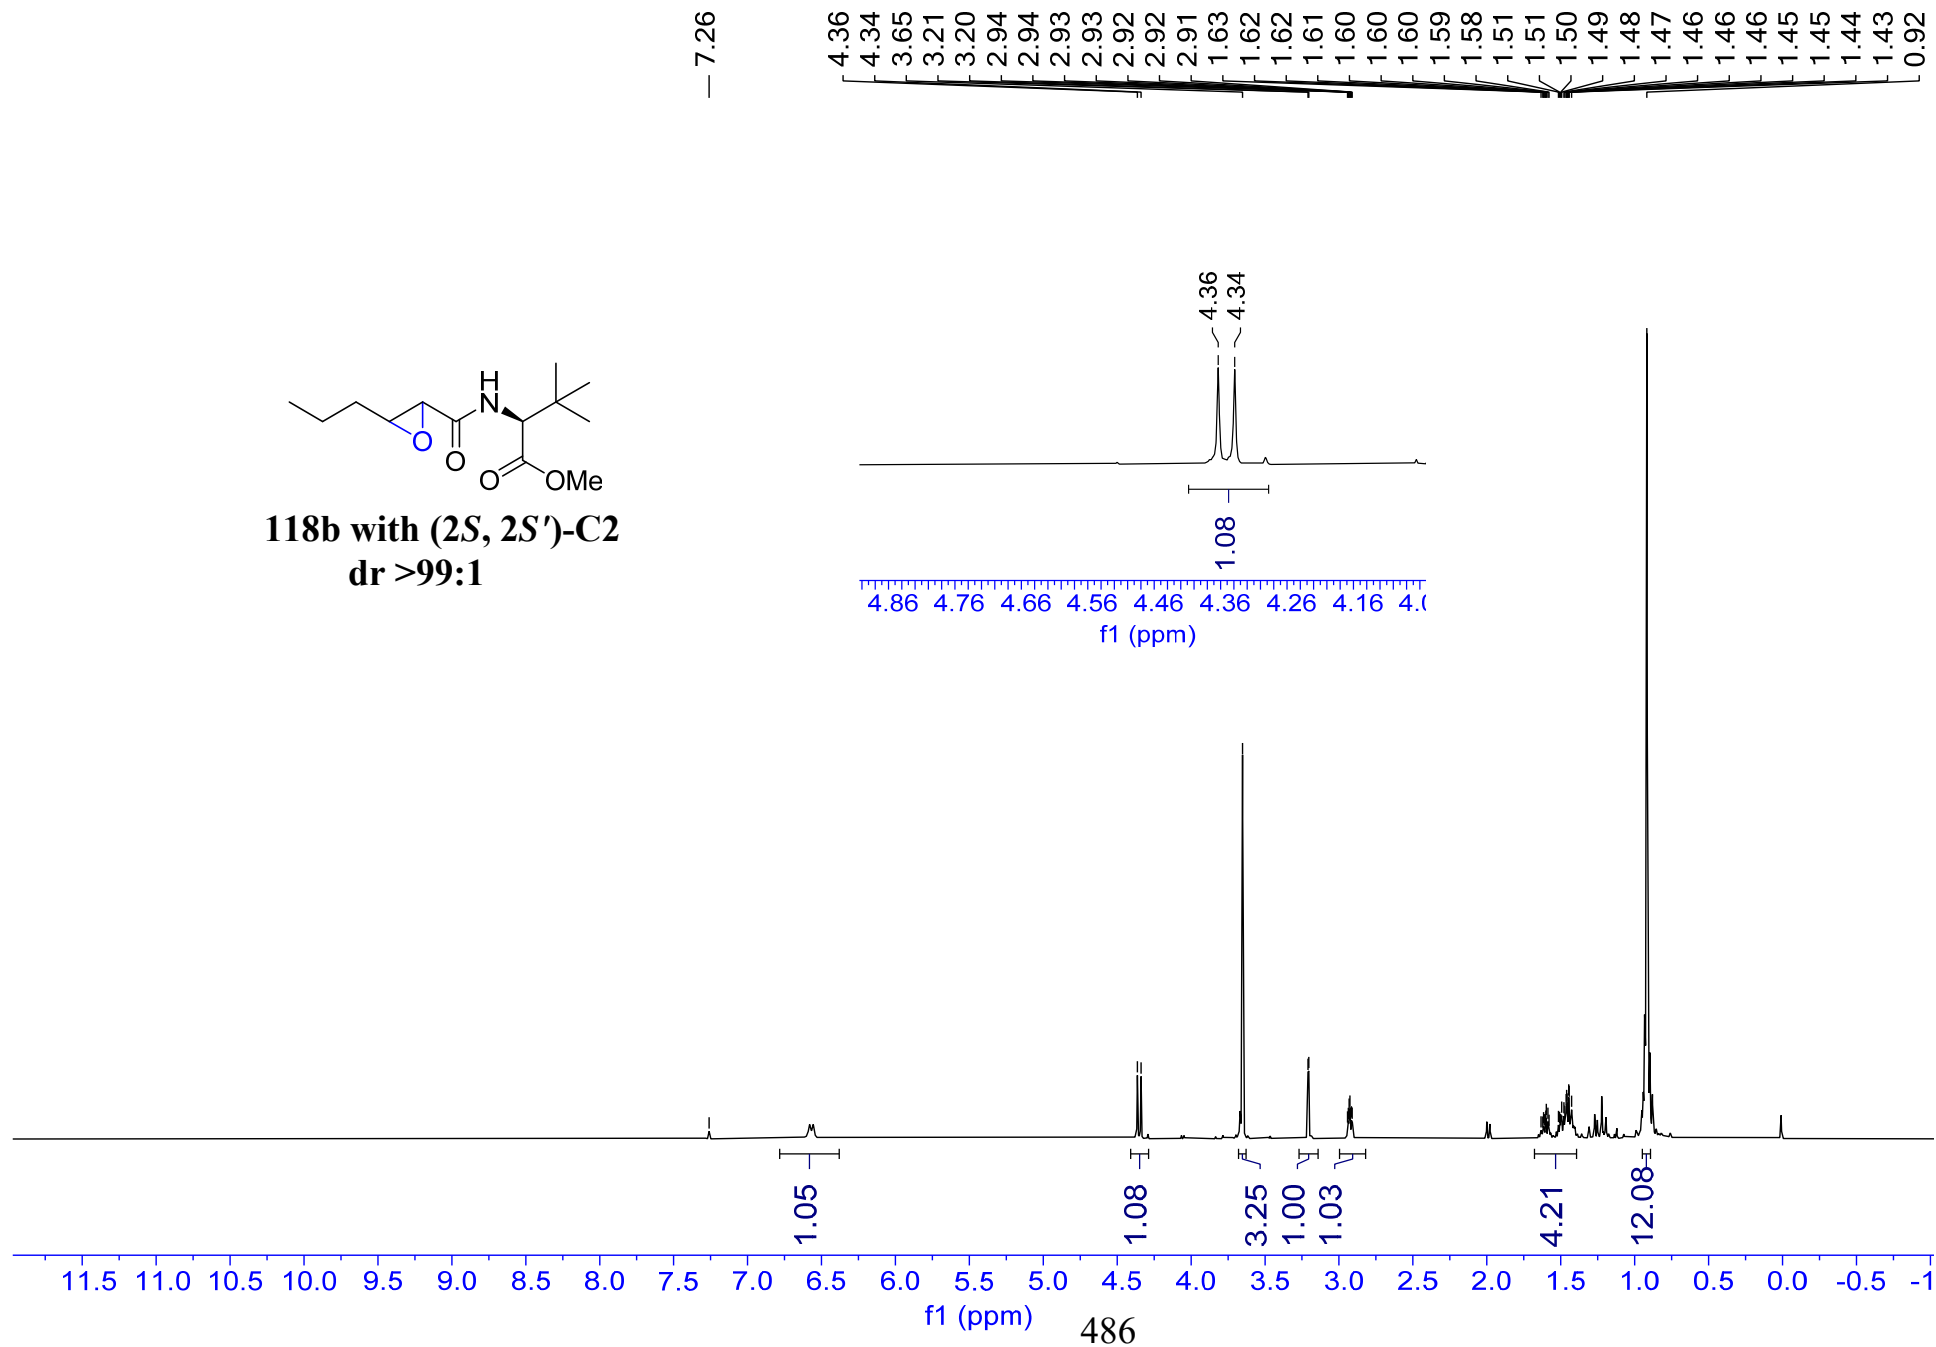

<sup>13</sup>C NMR 101 MHz, CDCl<sub>3</sub>

— 171.61  
— 168.45

77.48  
77.16  
76.84

59.40  
59.37  
55.13  
51.84

34.59  
33.66

— 26.52

— 18.97

— 13.82

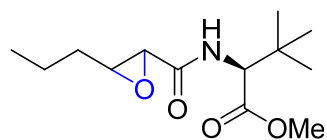

**118b with (2*S*, 2*S*')-C2**  
**dr >99:1**

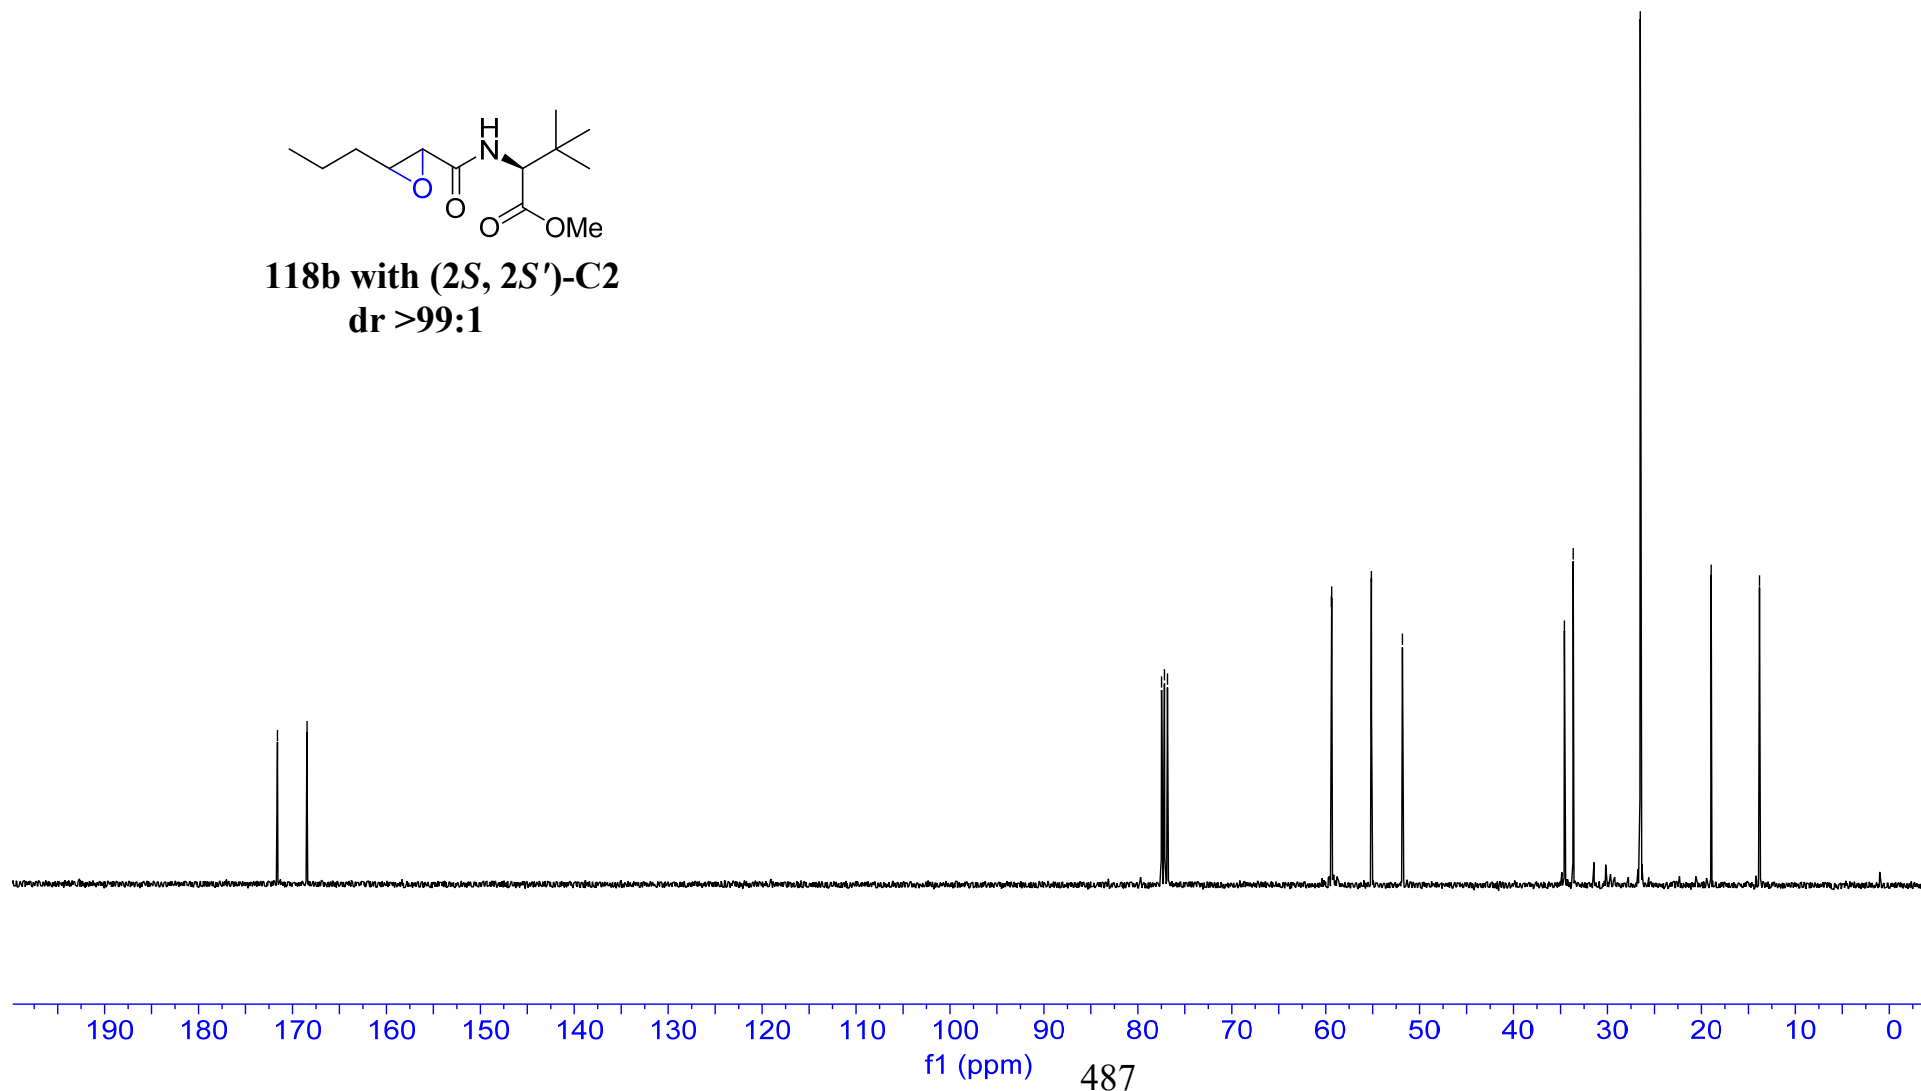

<sup>1</sup>H NMR, 400 MHz, CDCl<sub>3</sub>

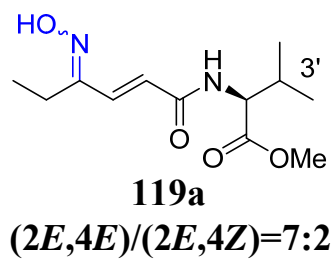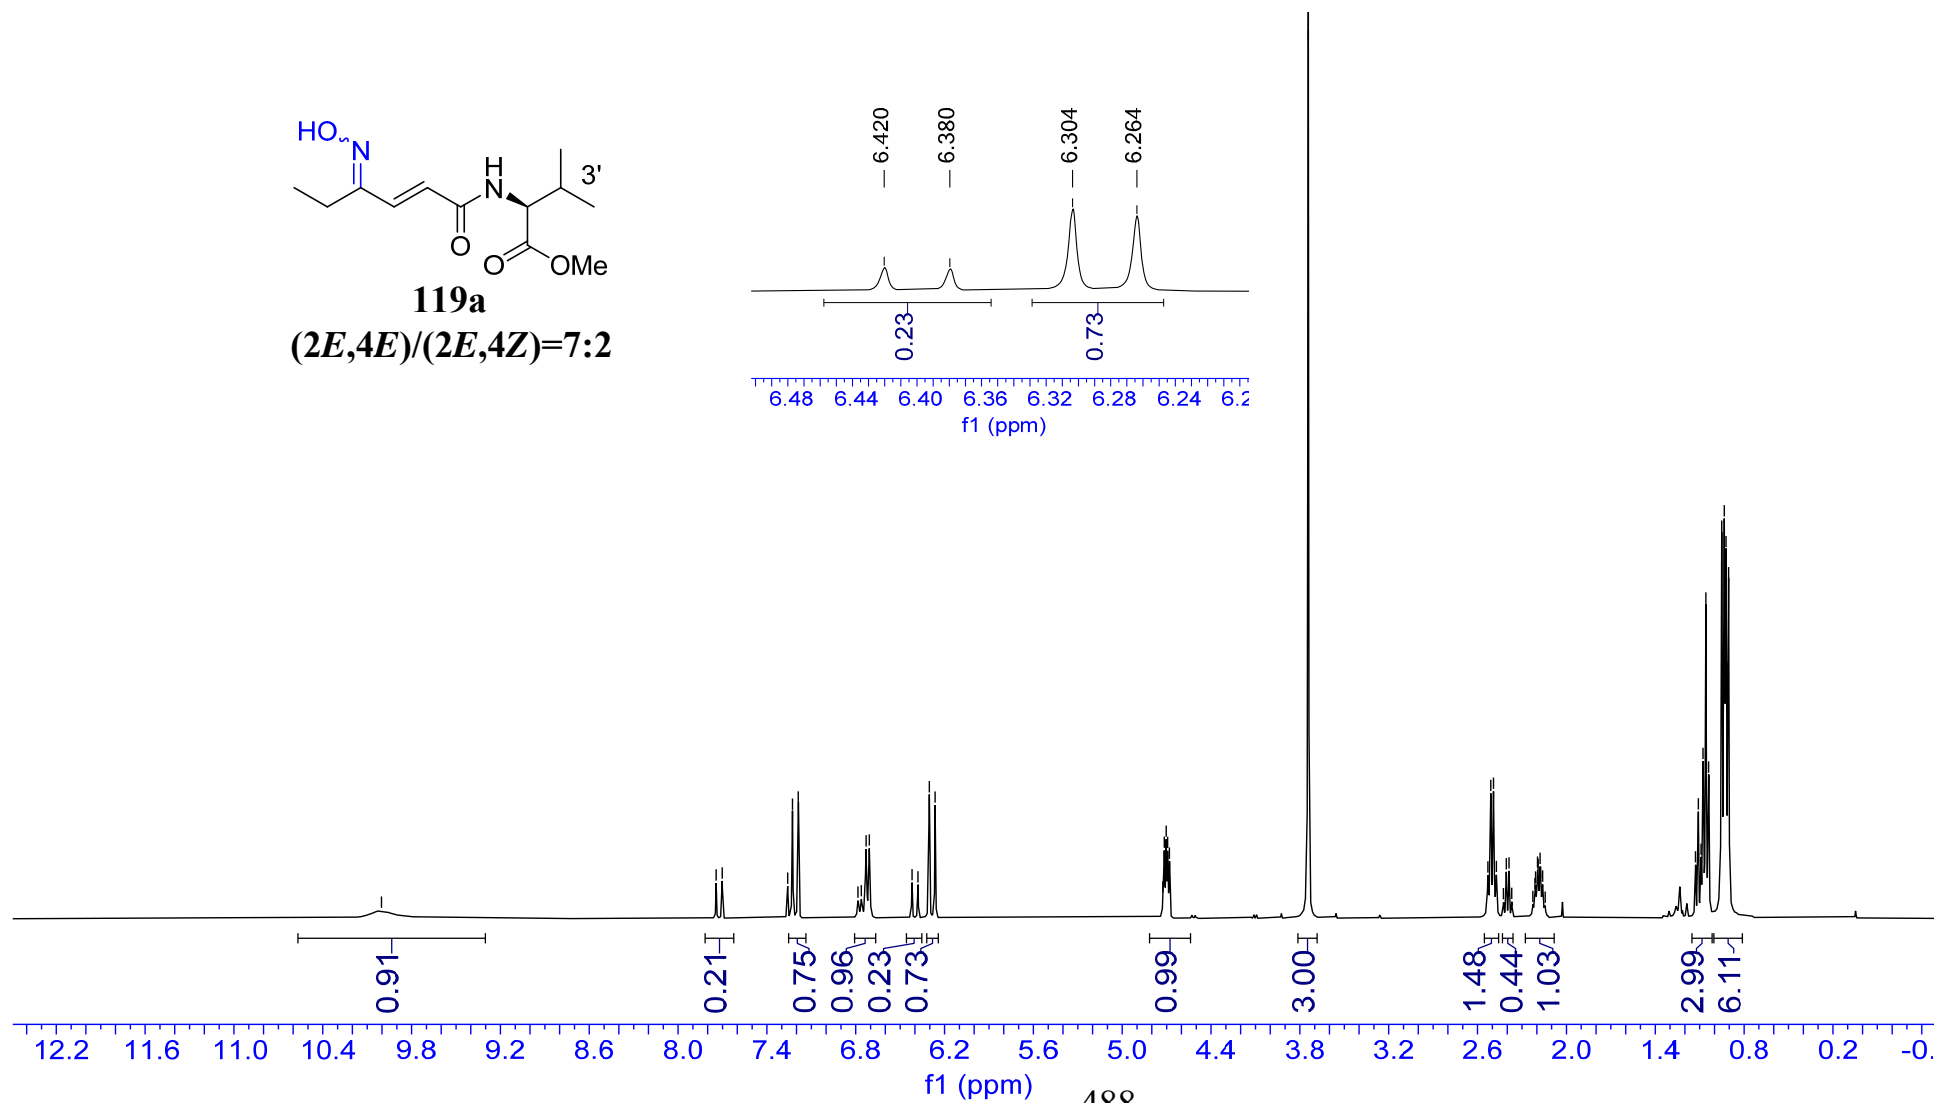

<sup>13</sup>C NMR 101 MHz, CDCl<sub>3</sub>

173.36  
173.18  
165.86  
165.84  
159.56  
155.06

137.83

127.90  
127.55  
124.23

77.48  
77.16  
76.84

57.45  
57.37  
52.48

31.49  
24.76  
19.05  
18.06  
18.04  
17.90  
11.70  
10.73

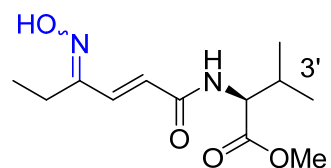

**119a**

(2*E*,4*E*)/(2*E*,4*Z*)=7:2

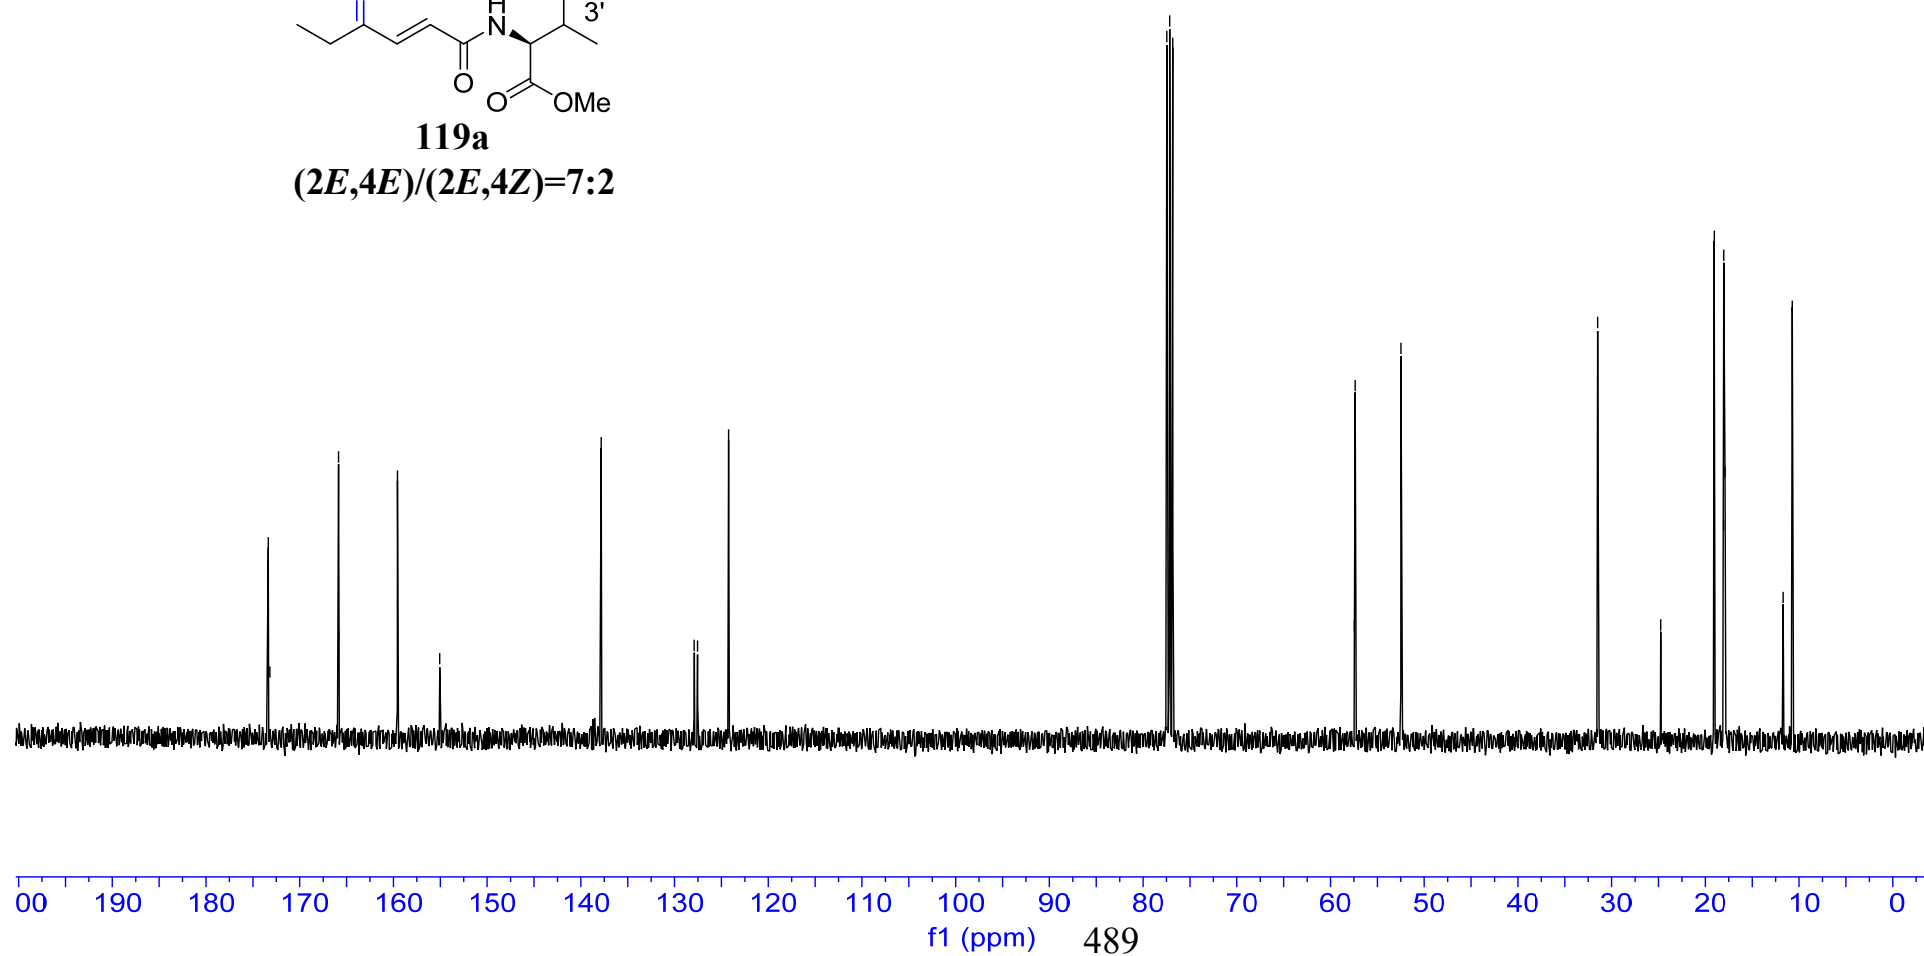

<sup>1</sup>H NMR, 400 MHz, CDCl<sub>3</sub>

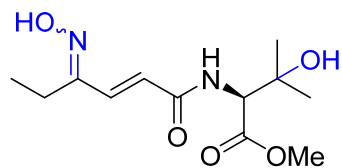

**119a-3'-OH**  
(2E,4E)/(2E,4Z)=4:1

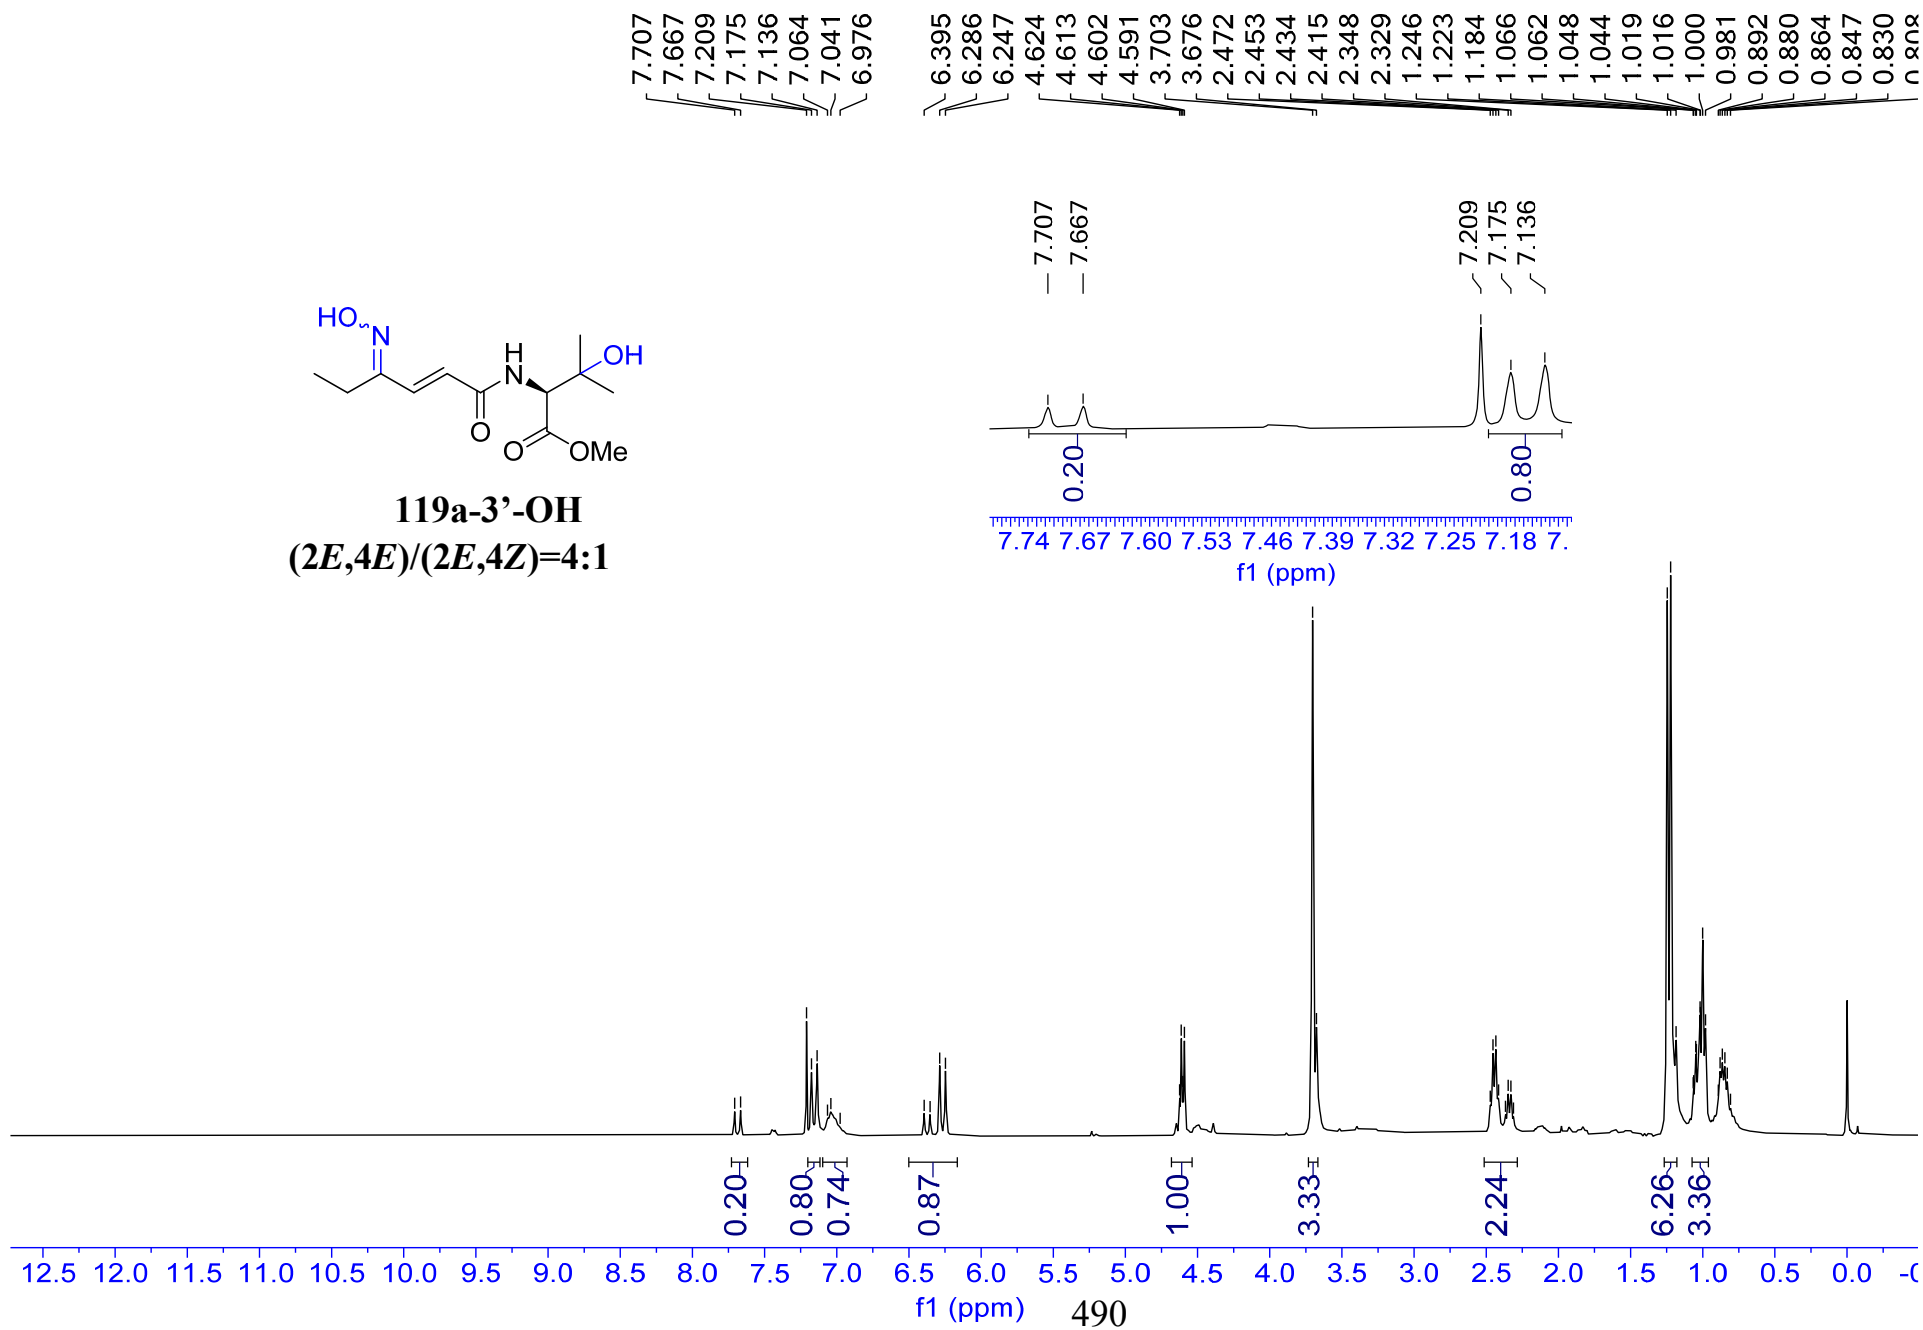

<sup>13</sup>C NMR 101 MHz, CDCl<sub>3</sub>

172.12  
166.15  
159.65  
155.28

138.16

128.24  
127.21  
123.94

77.48  
77.16  
76.84  
72.23

60.22

52.56

26.95  
26.82

17.94

10.73

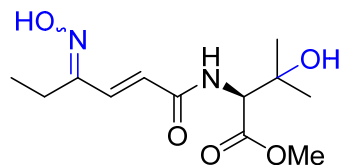

**119a-3'-OH**  
**(2E,4E)/(2E,4Z)=4:1**

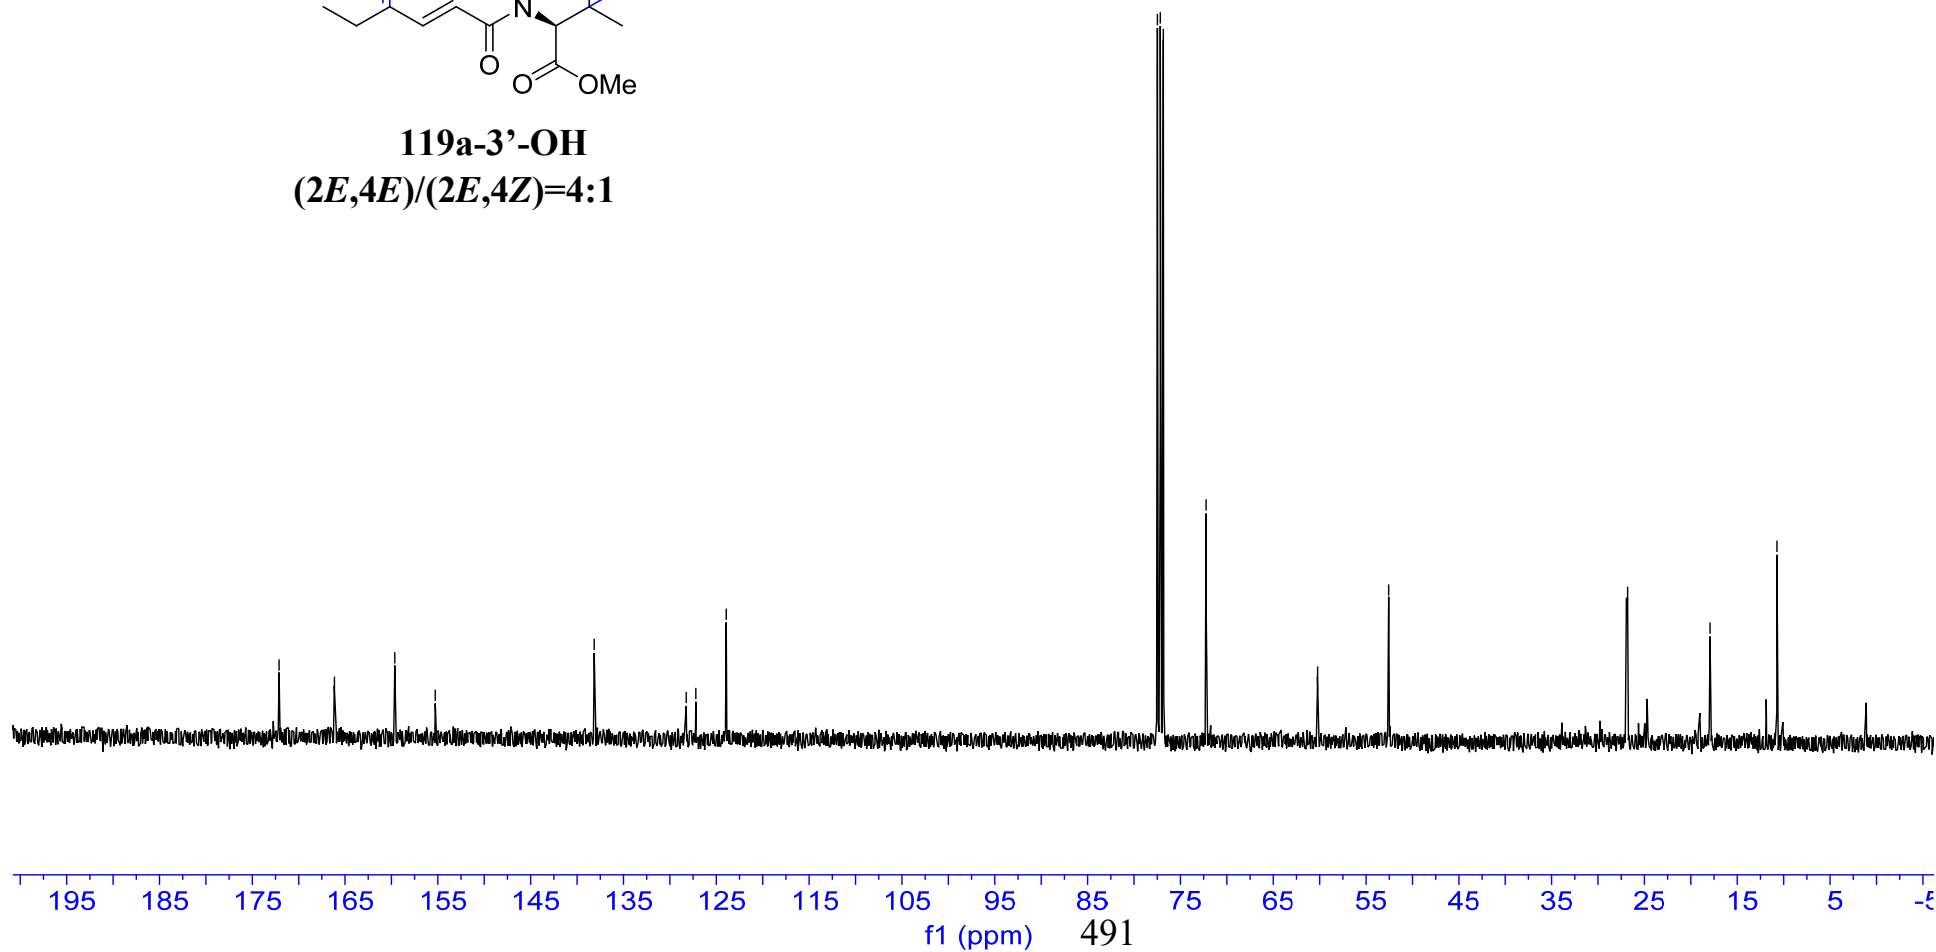

$^1\text{H}$  NMR, 400 MHz,  $\text{CDCl}_3$

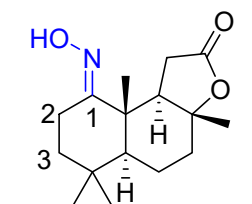

120a, *E*-isomer

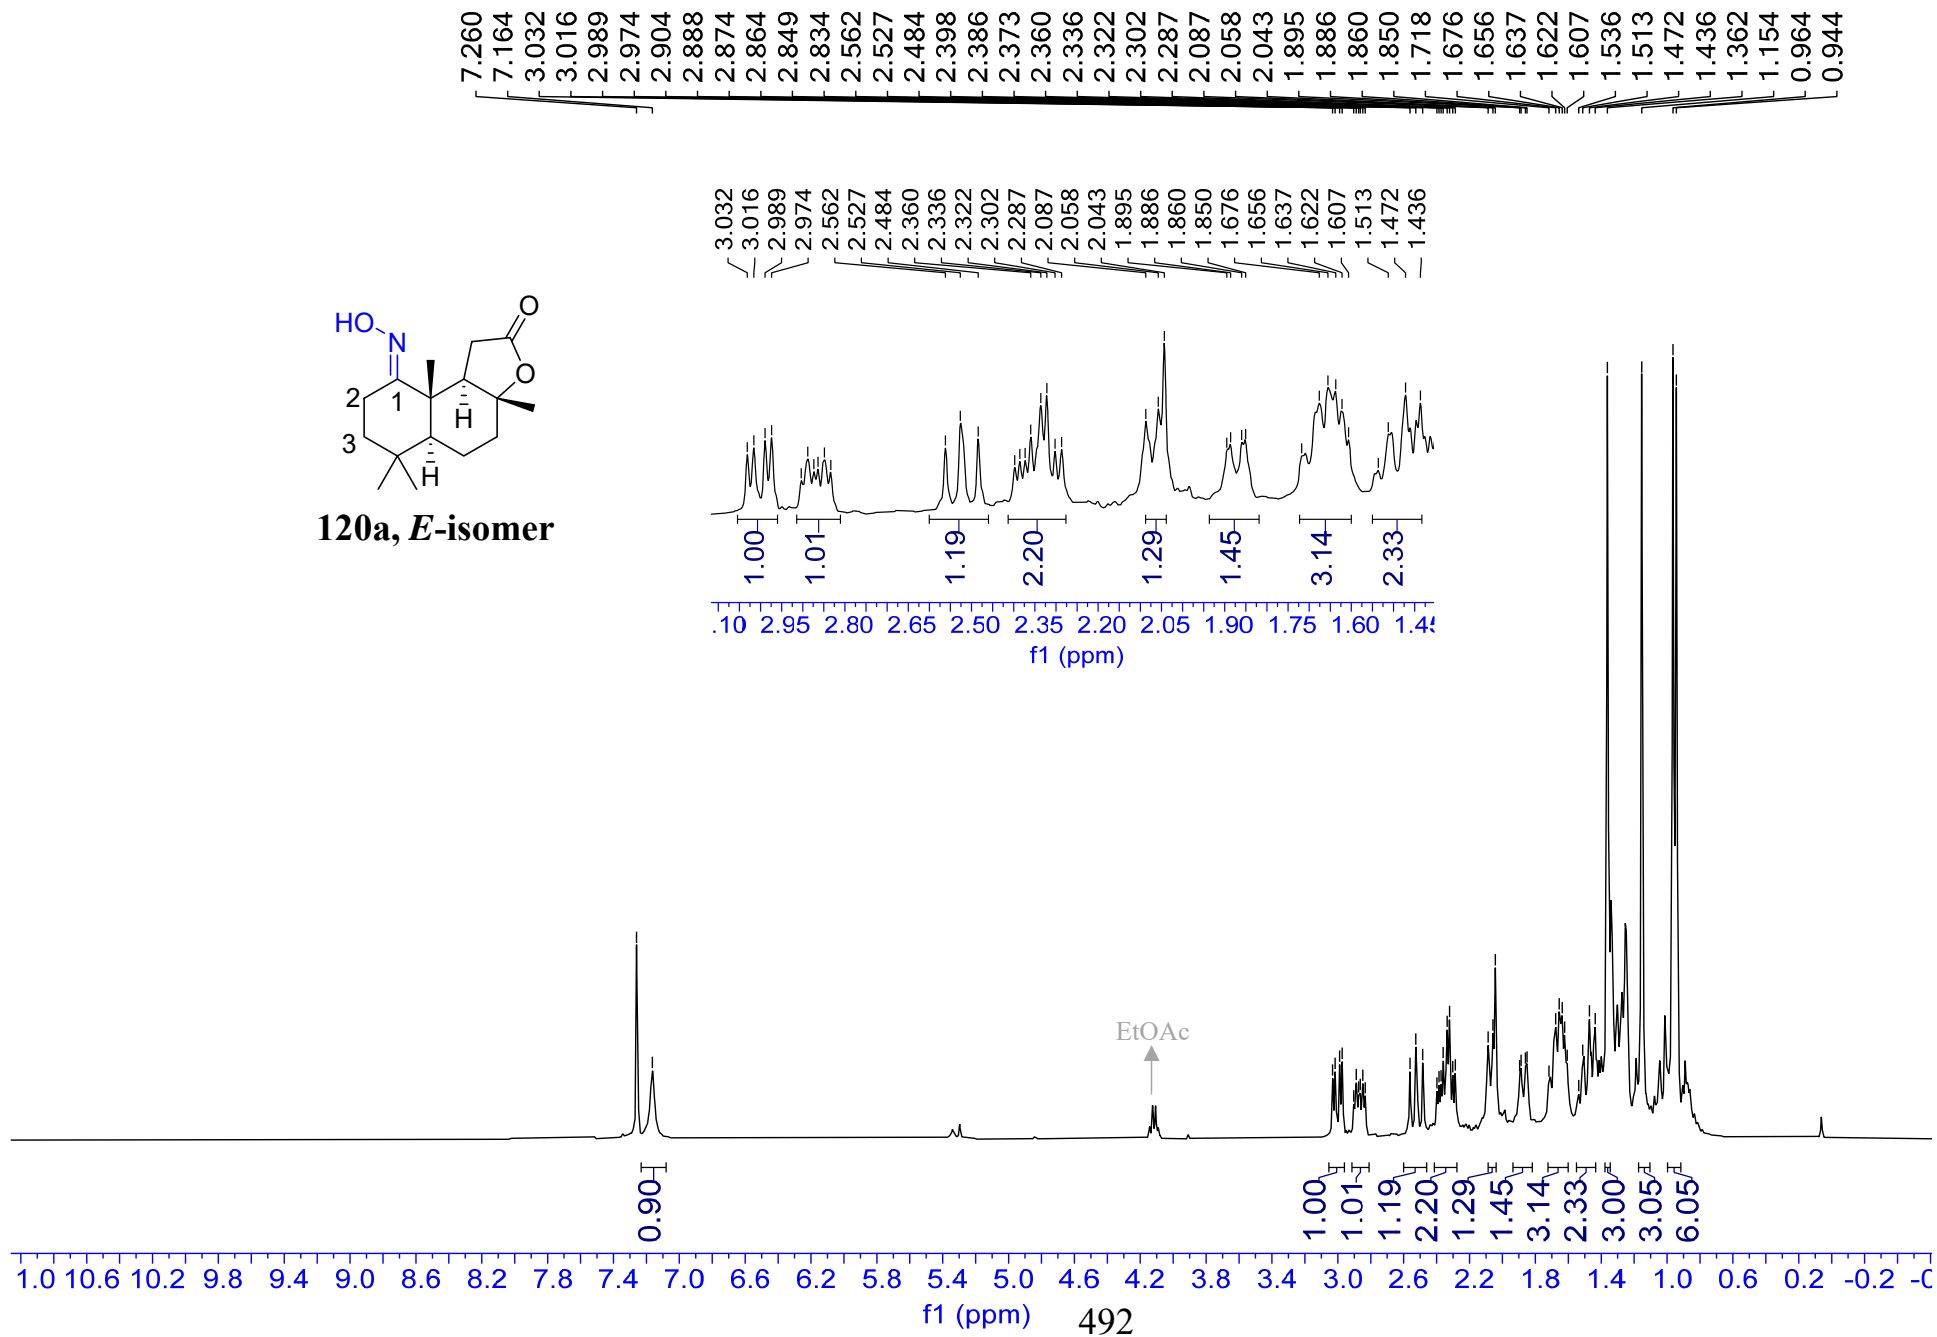



$^{13}\text{C}$  NMR 101 MHz,  $\text{CDCl}_3$

— 177.86

— 165.95

— 86.29

77.48

77.16

76.84

55.15

53.72

43.13

38.79

37.97

32.97

32.00

31.83

22.99

22.01

21.01

17.88

16.31

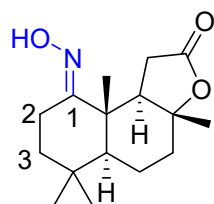

**120a, *E*-isomer**

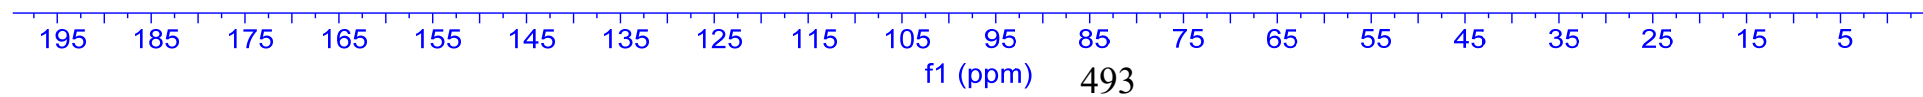

f1 (ppm)      494

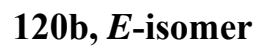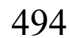

$^{13}\text{C}$  NMR 101 MHz,  $\text{CDCl}_3$

— 176.27

— 157.23

— 86.08

77.48

77.16

76.84

58.30

56.64

45.85

39.74

38.73

38.36

36.53

32.81

28.78

22.27

21.41

20.71

15.38

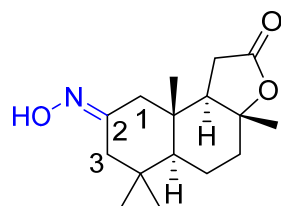

**120b, *E*-isomer**

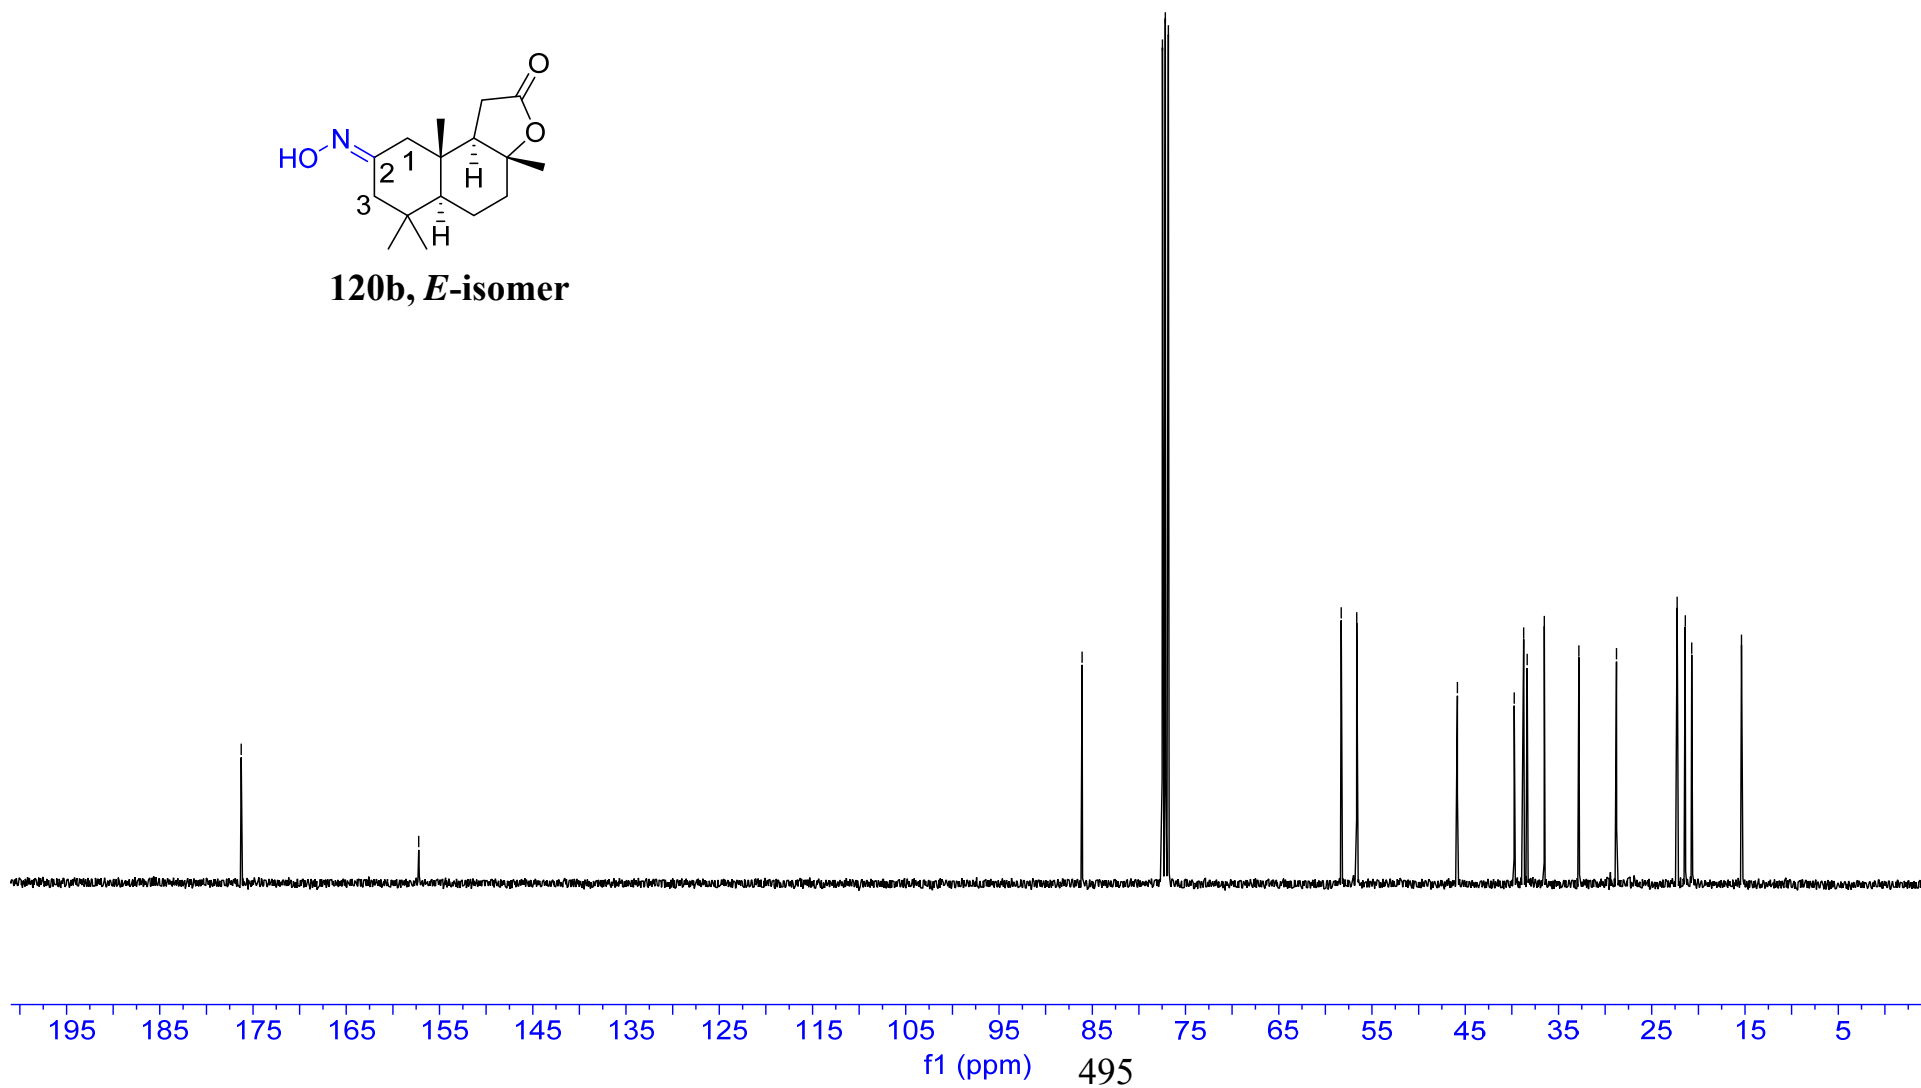

$^1\text{H}$  NMR, 400 MHz,  $\text{CDCl}_3$

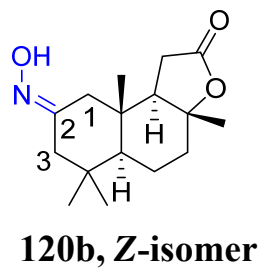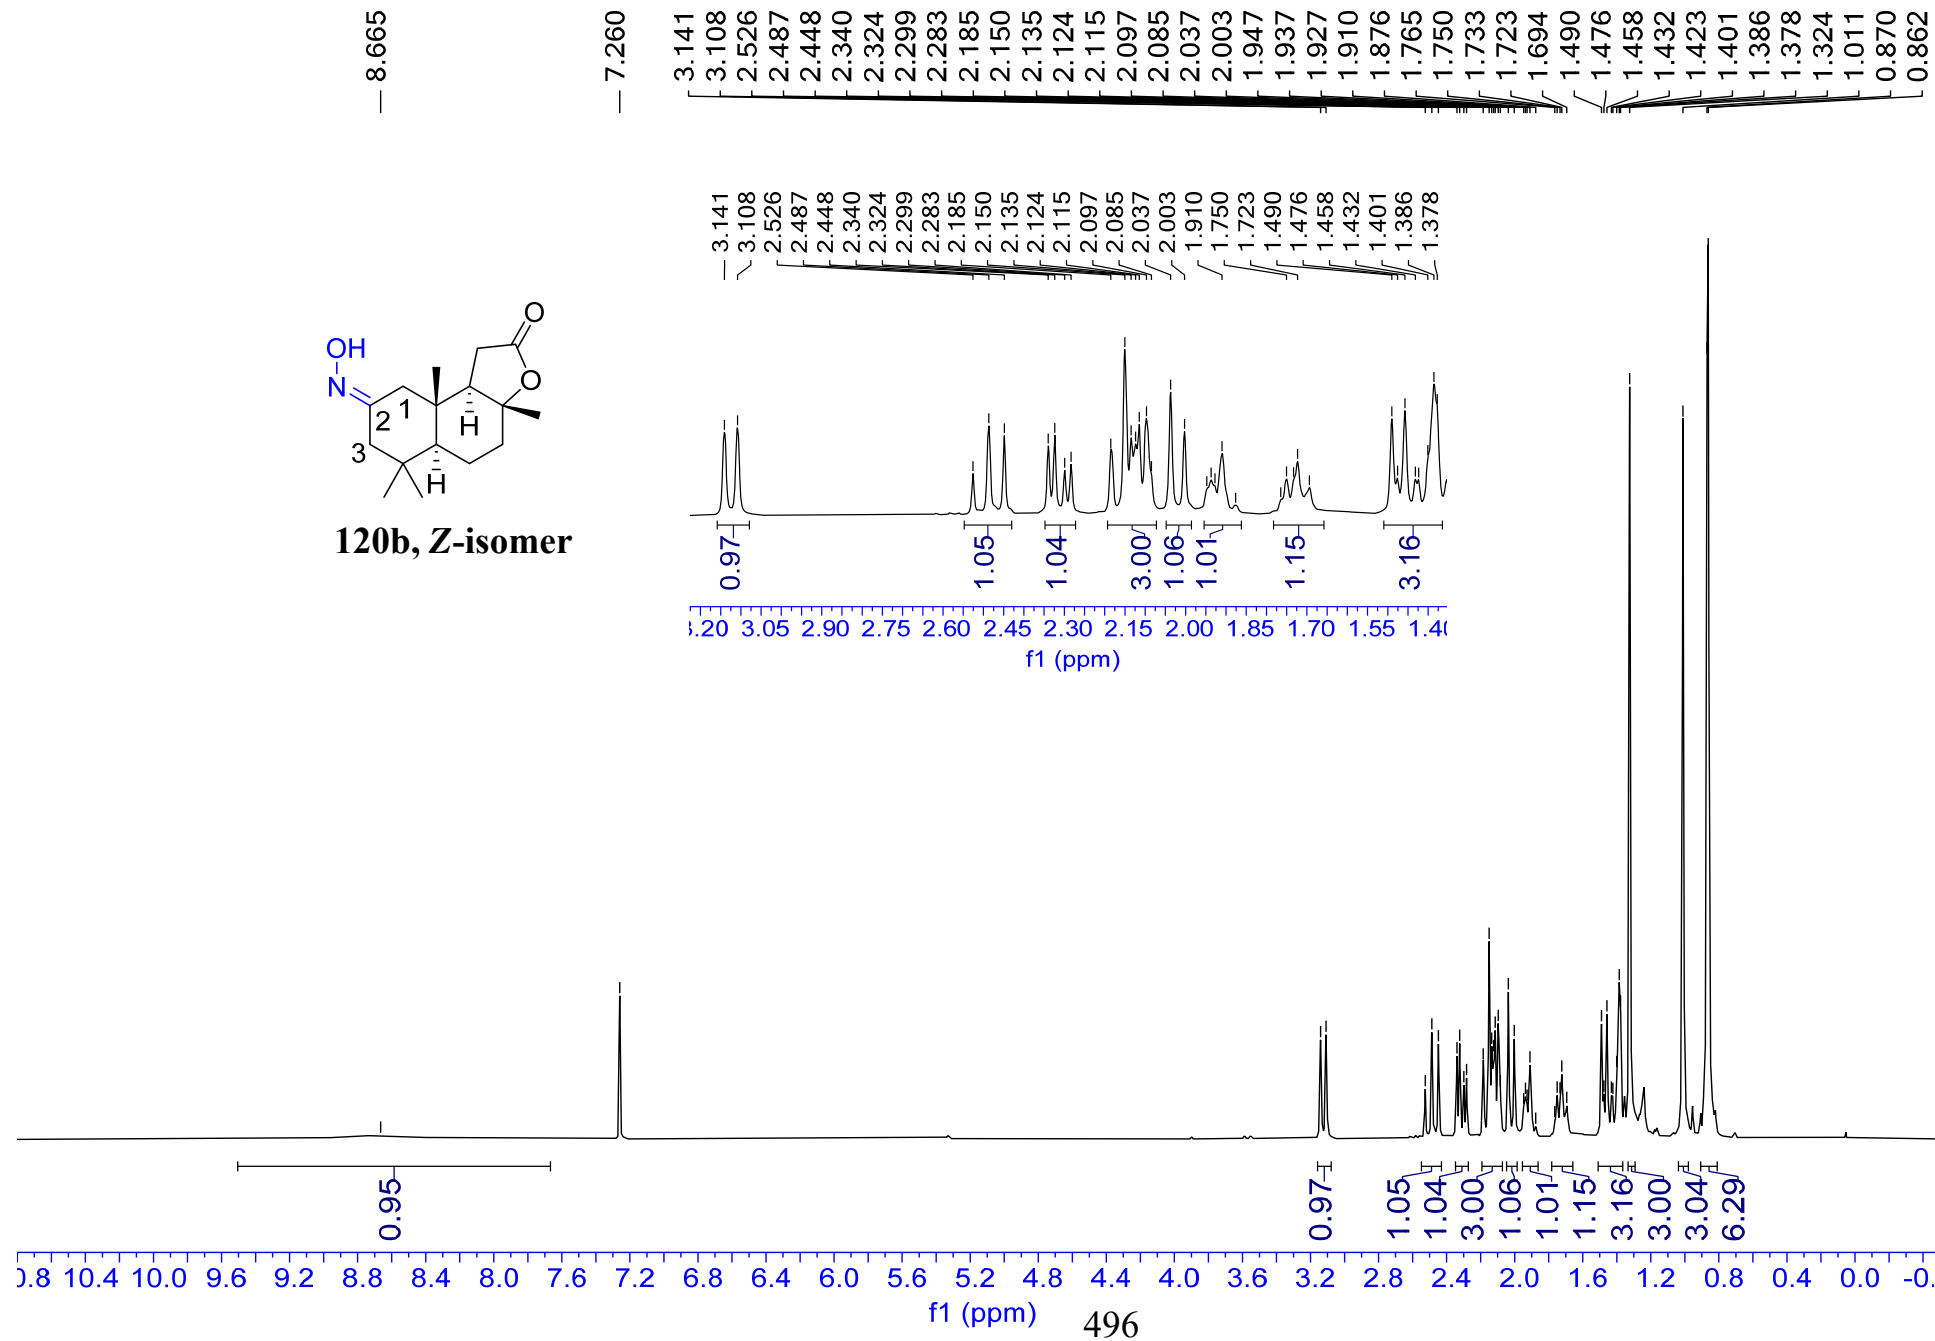

$^{13}\text{C}$  NMR 101 MHz,  $\text{CDCl}_3$

— 176.30

— 157.17

— 86.08

77.48

77.16

76.84

58.17

56.47

47.19

38.71

38.41

38.30

36.50

32.71

28.92

21.71

21.30

20.68

15.91

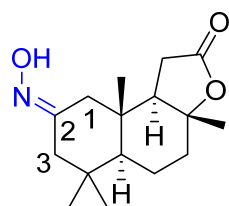

**120b, Z-isomer**

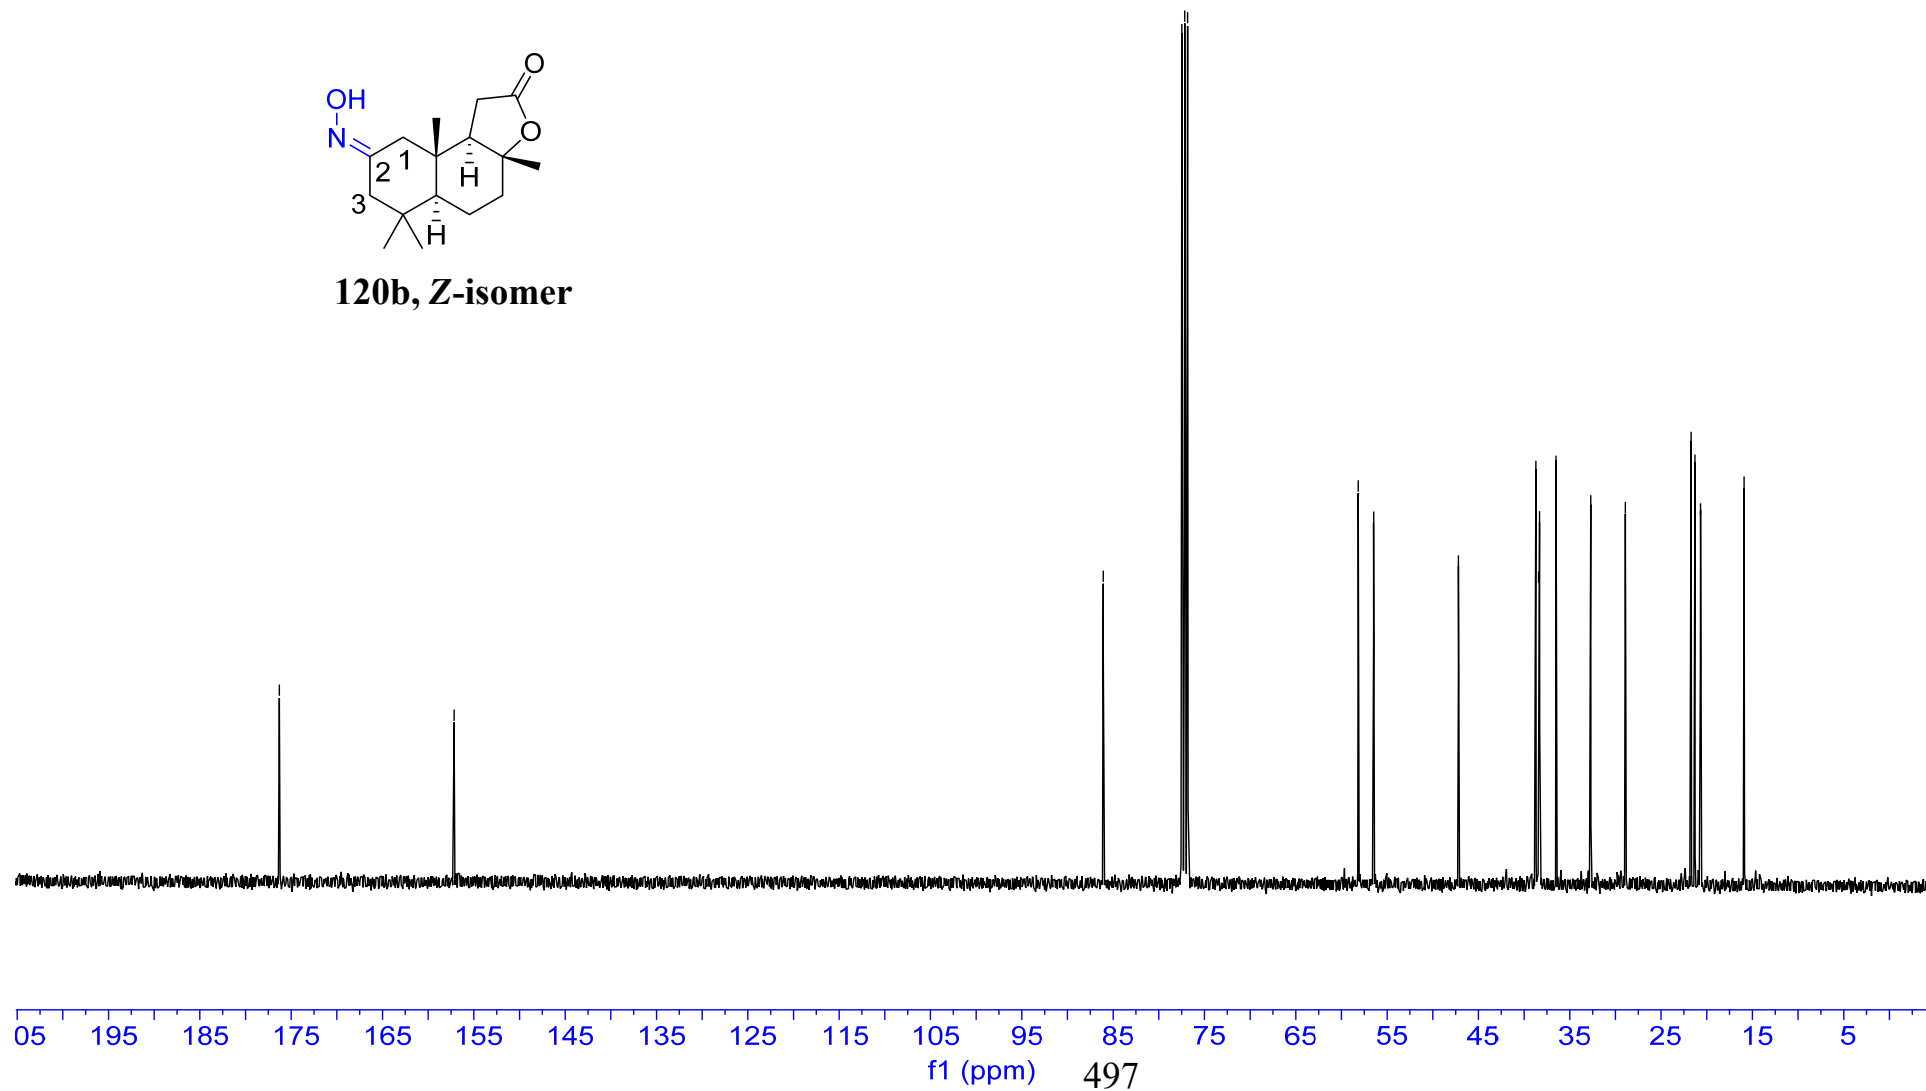

<sup>1</sup>H NMR, 400 MHz, CDCl<sub>3</sub>

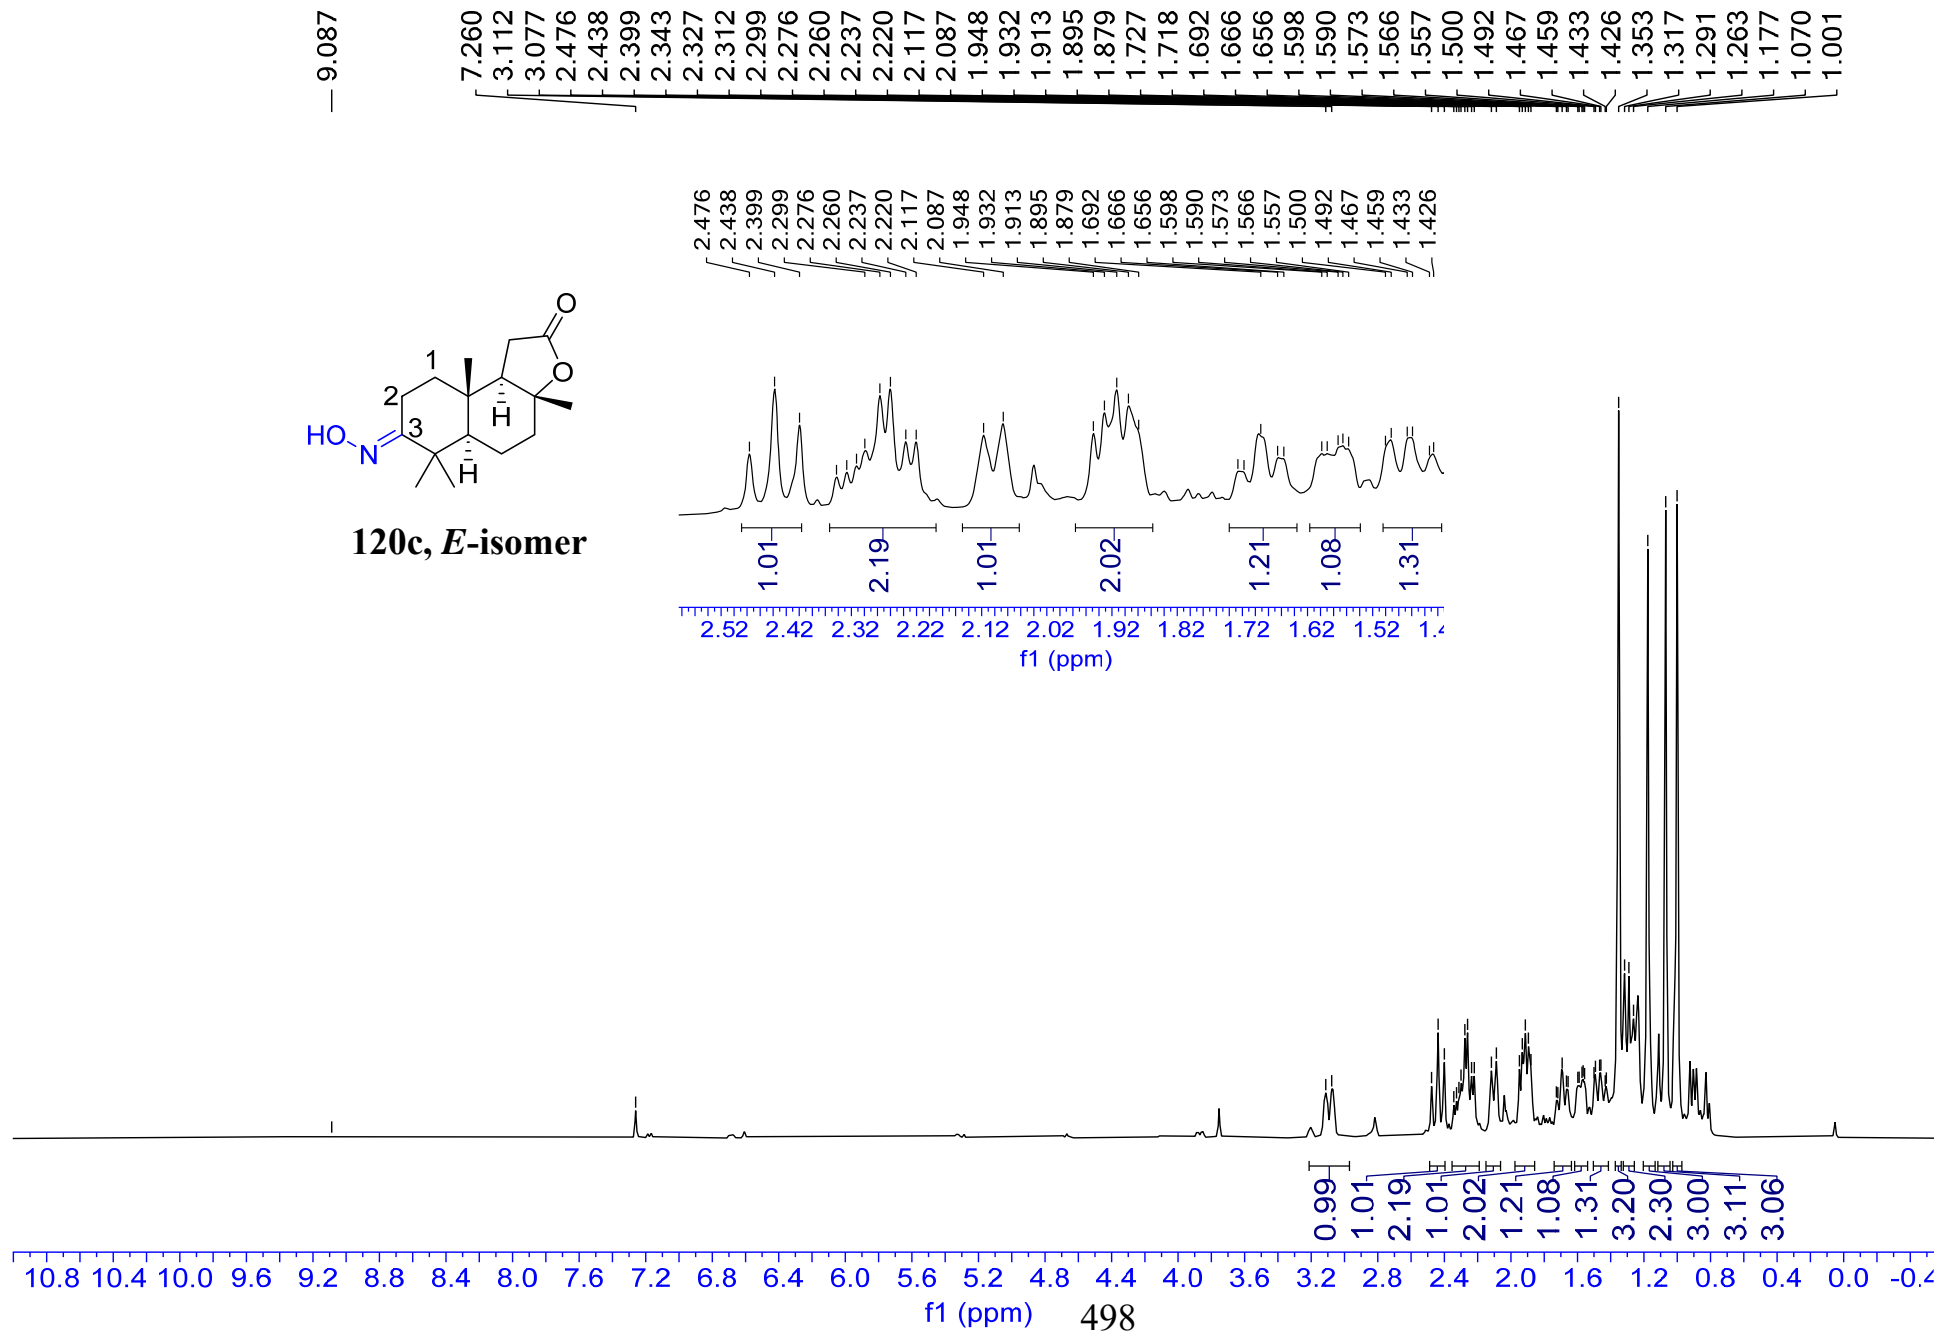

<sup>13</sup>C NMR 101 MHz, CDCl<sub>3</sub>

— 176.38

— 165.31

— 85.89

77.48

77.16

76.84

— 58.51

— 55.29

40.28

38.16

37.34

35.88

28.74

27.61

22.78

21.38

20.97

16.73

14.59

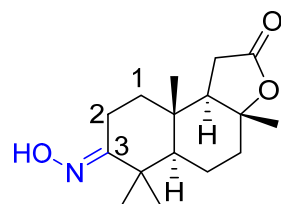

**120c, *E*-isomer**

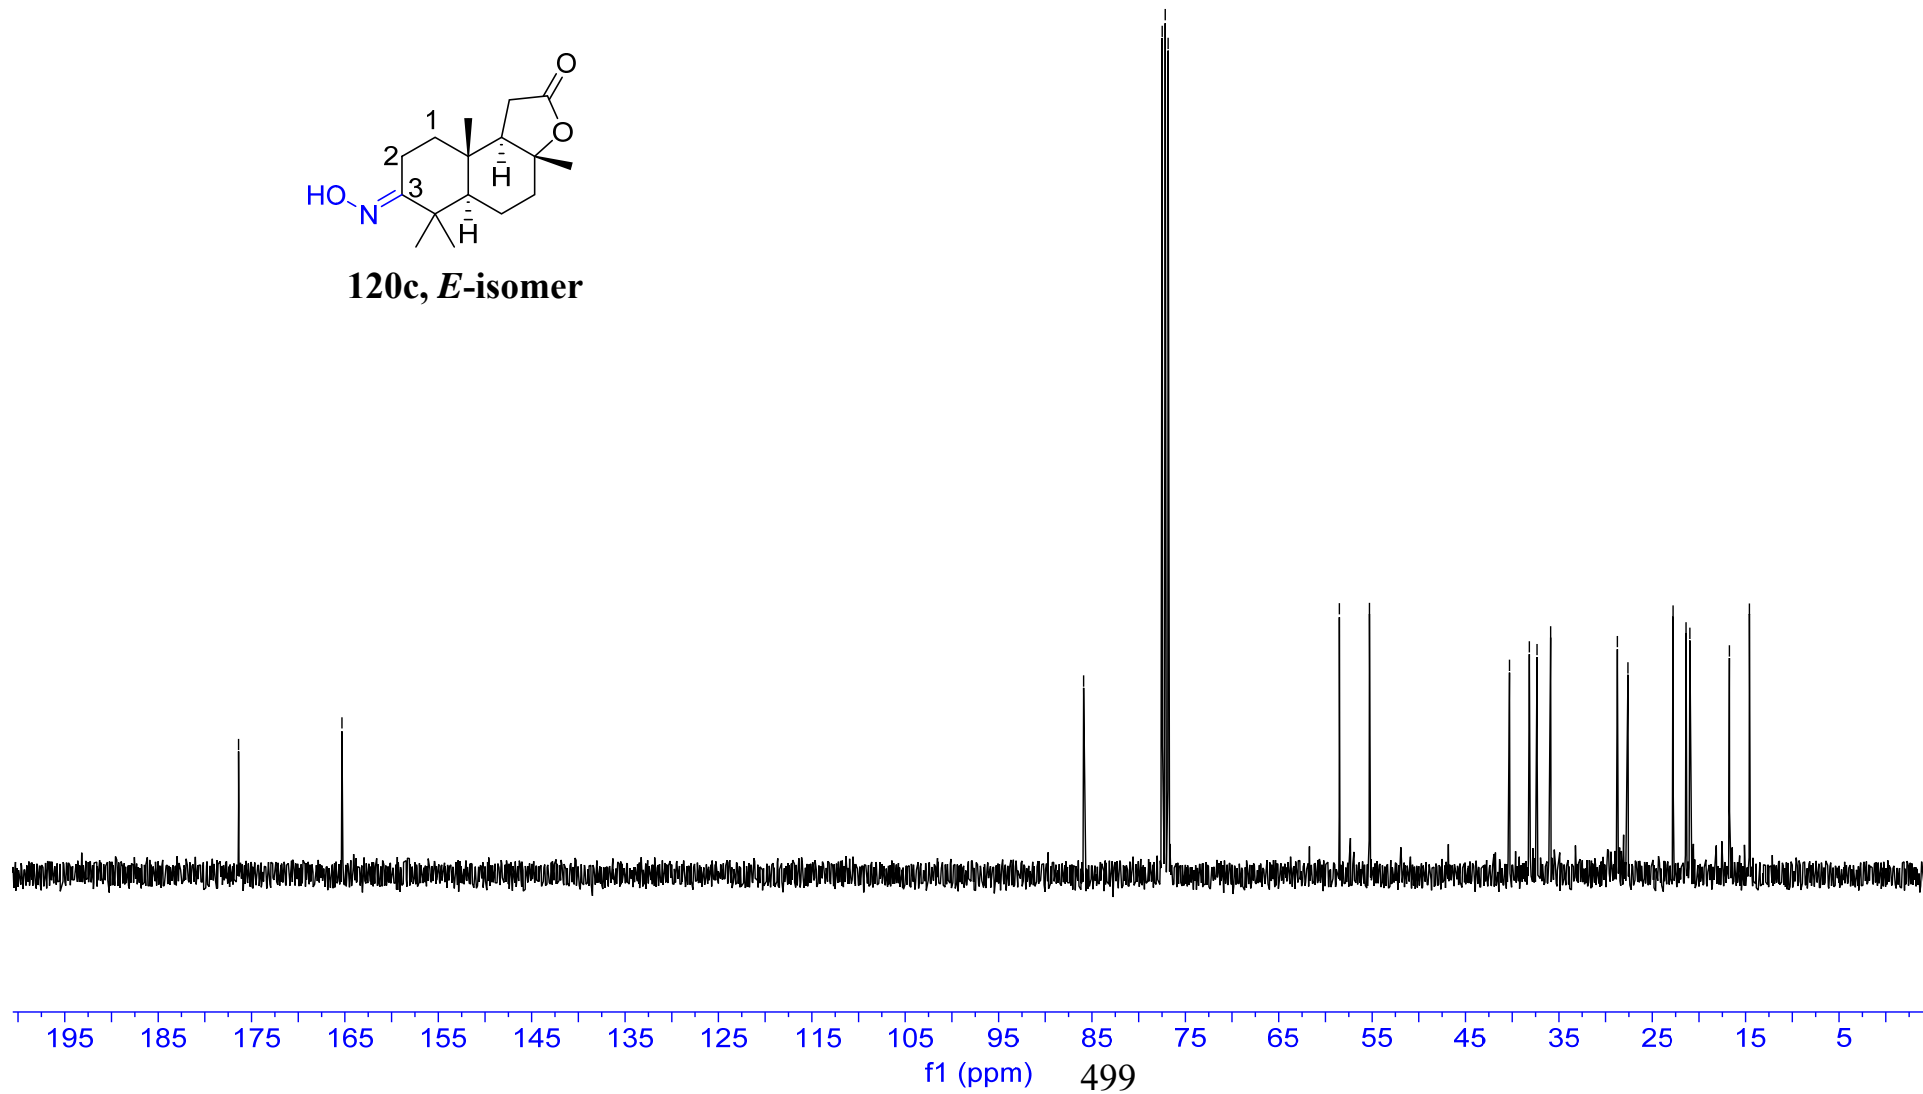

$^1\text{H}$  NMR, 400 MHz,  $\text{CDCl}_3$

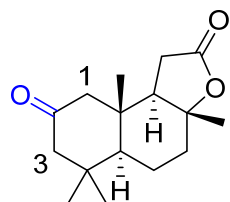

120d

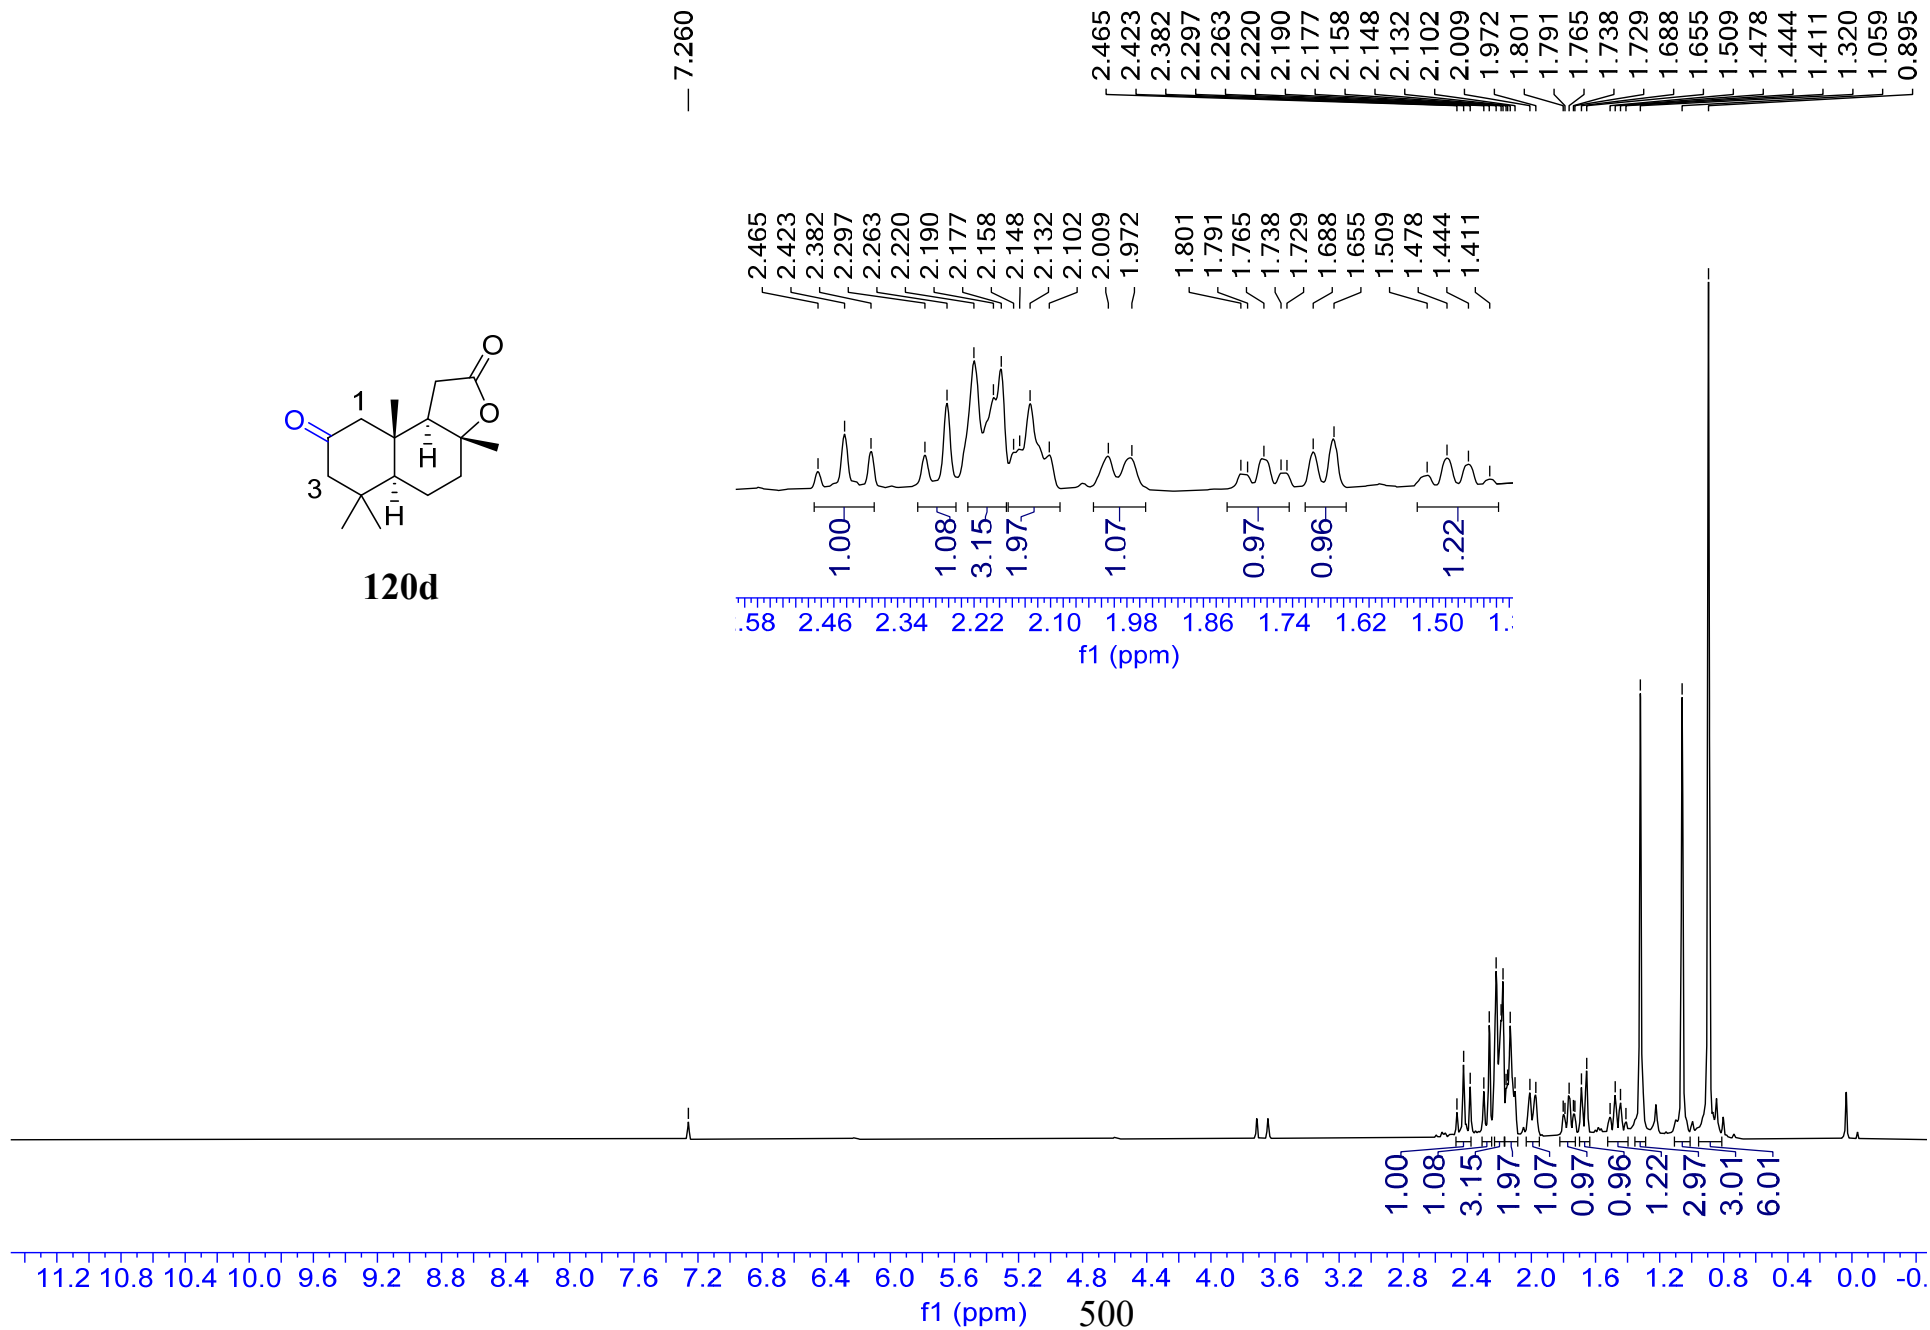



$^{13}\text{C}$  NMR 101 MHz,  $\text{CDCl}_3$

— 209.35

— 175.73

— 85.72

77.48

77.16

76.84

58.24

56.62

55.65

54.99

40.39

38.71

38.15

33.32

28.64

22.68

21.21

20.81

16.21

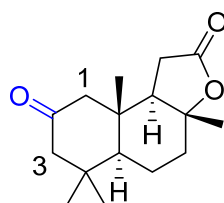

**120d**

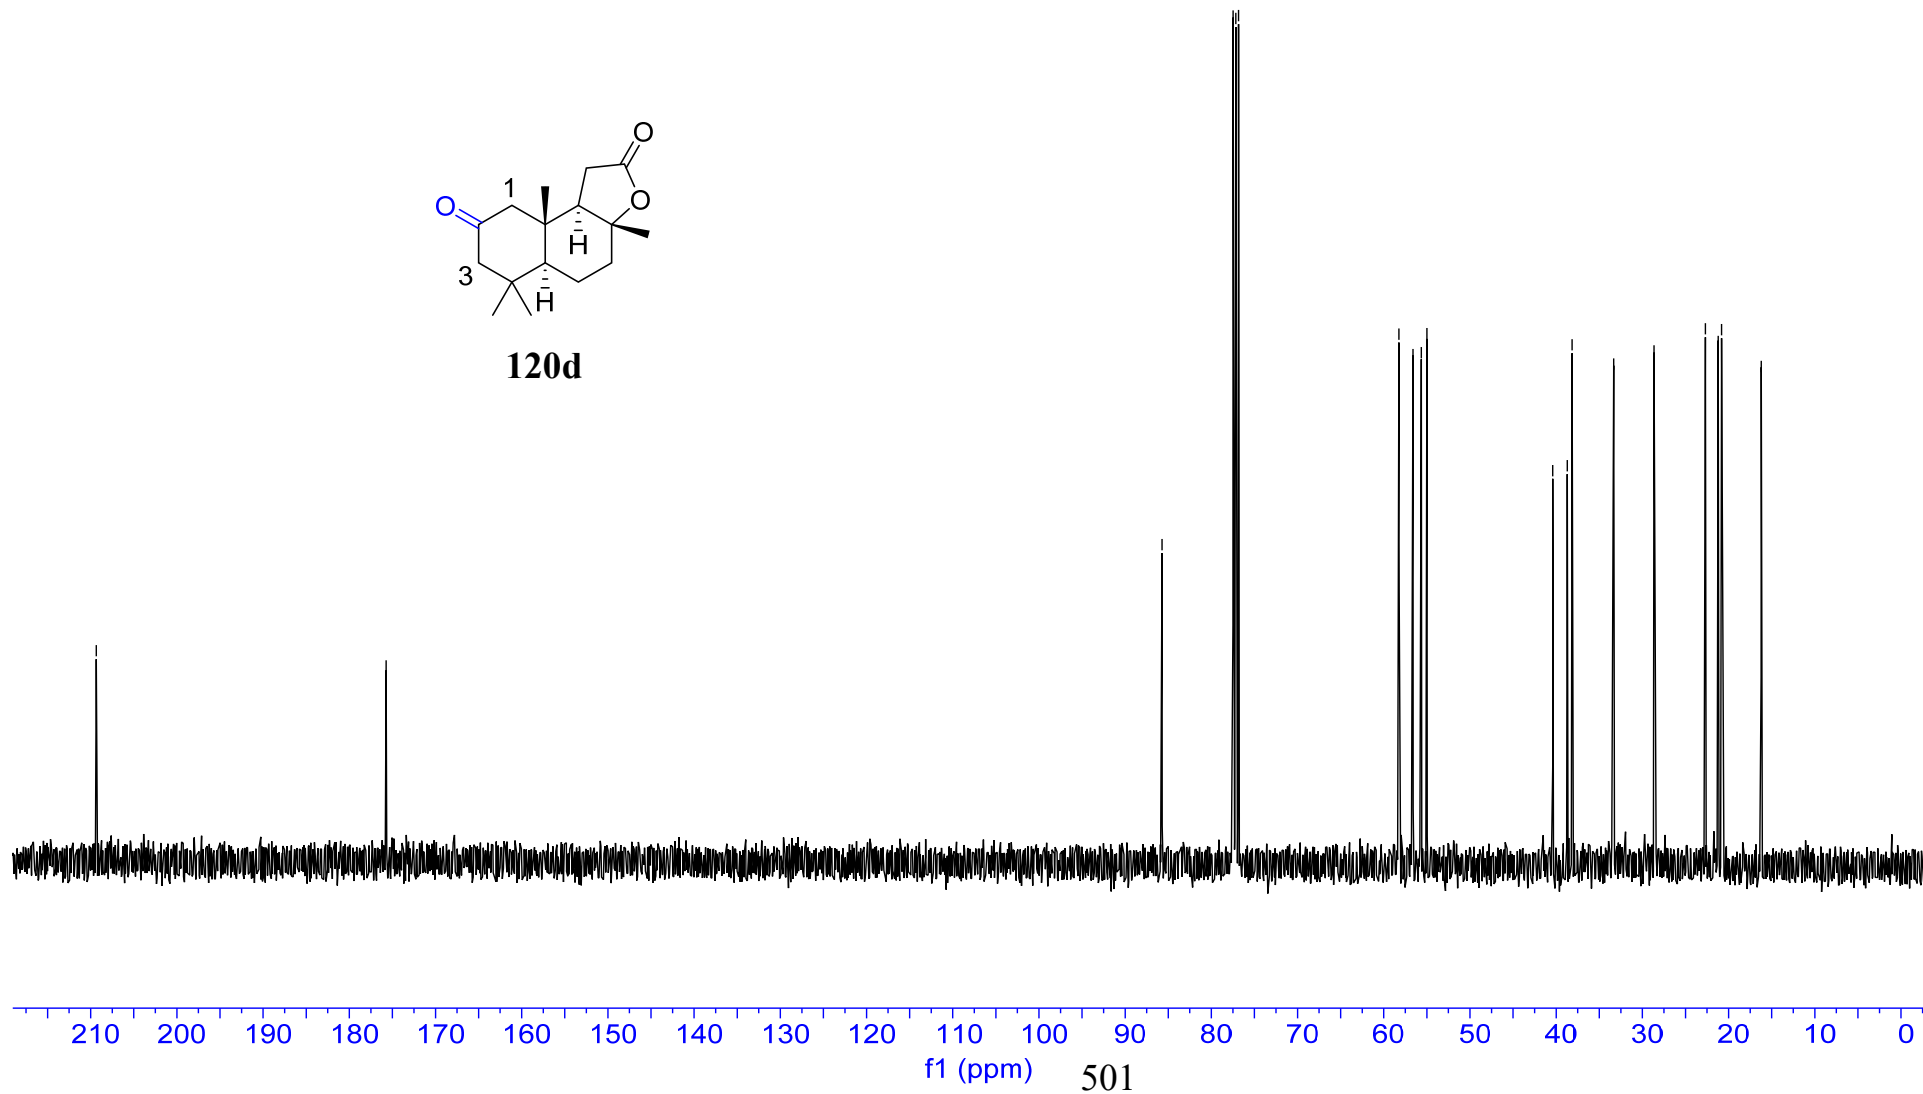

<sup>1</sup>H NMR, 400 MHz, CDCl<sub>3</sub>

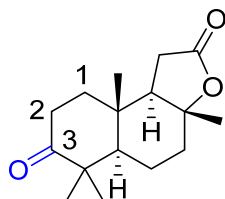

**120e**

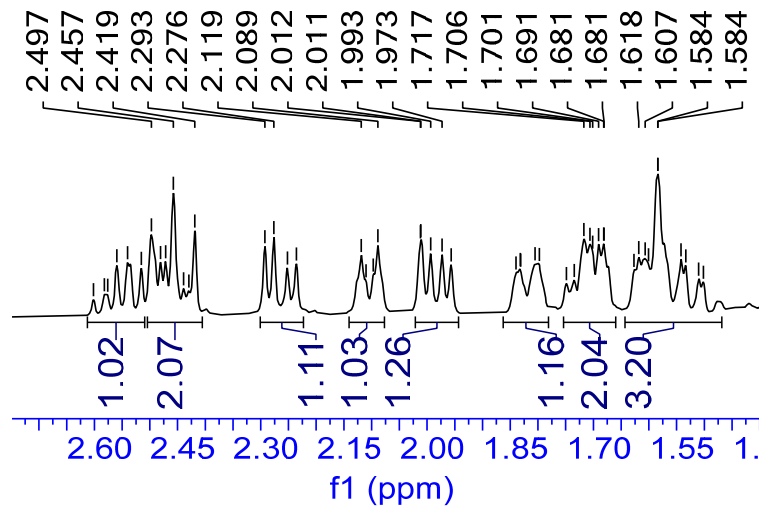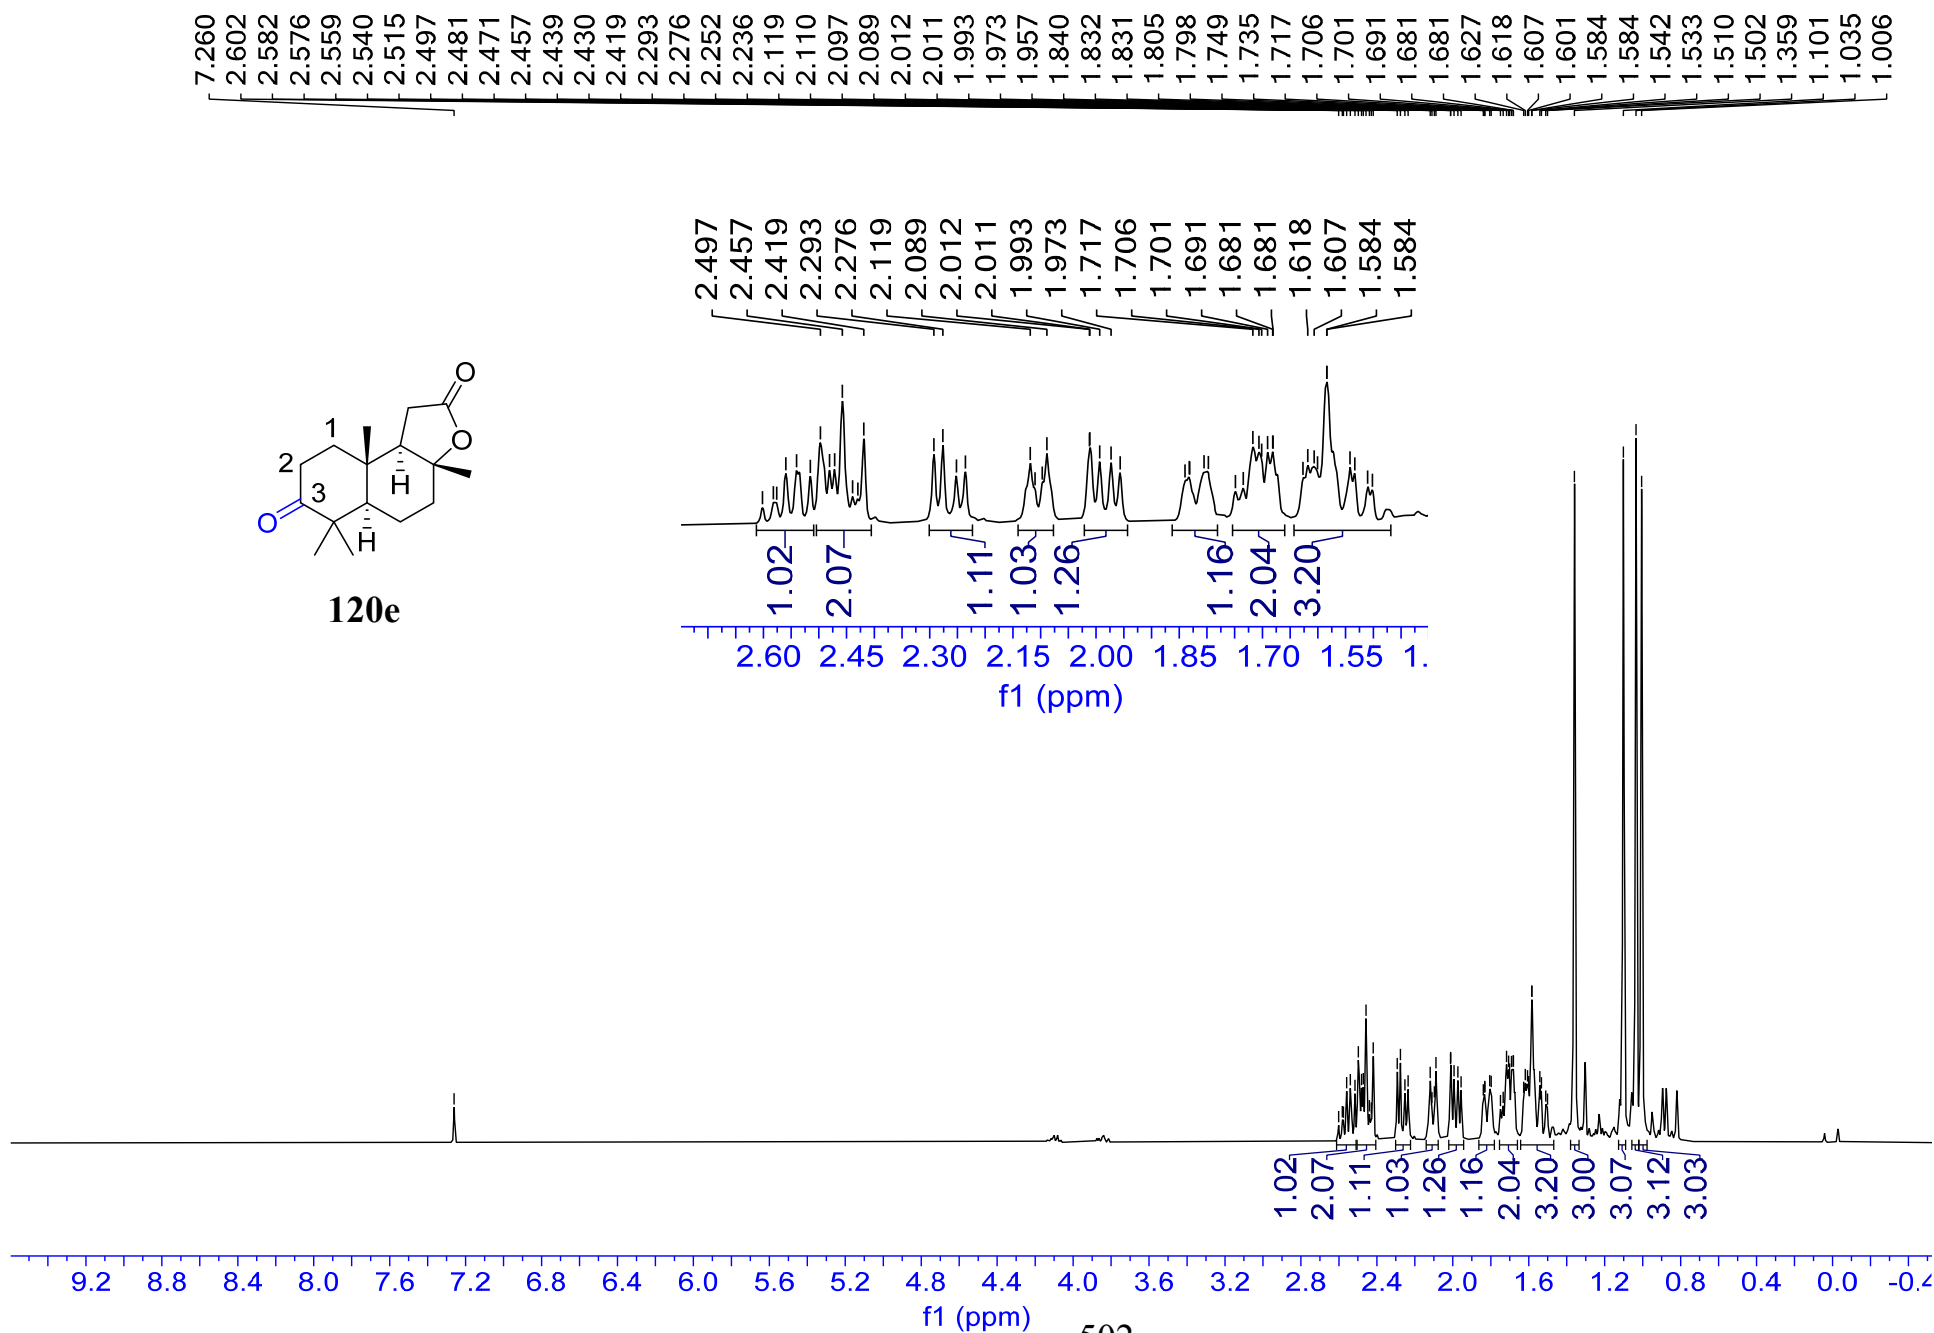

$^{13}\text{C}$  NMR 101 MHz,  $\text{CDCl}_3$

— 215.57

— 176.02

— 85.70

77.48

77.16

76.84

58.20

54.41

47.39

37.81

37.74

35.61

33.47

28.69

26.73

21.51

21.18

20.76

14.58

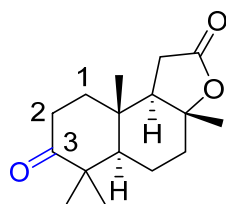

**120e**

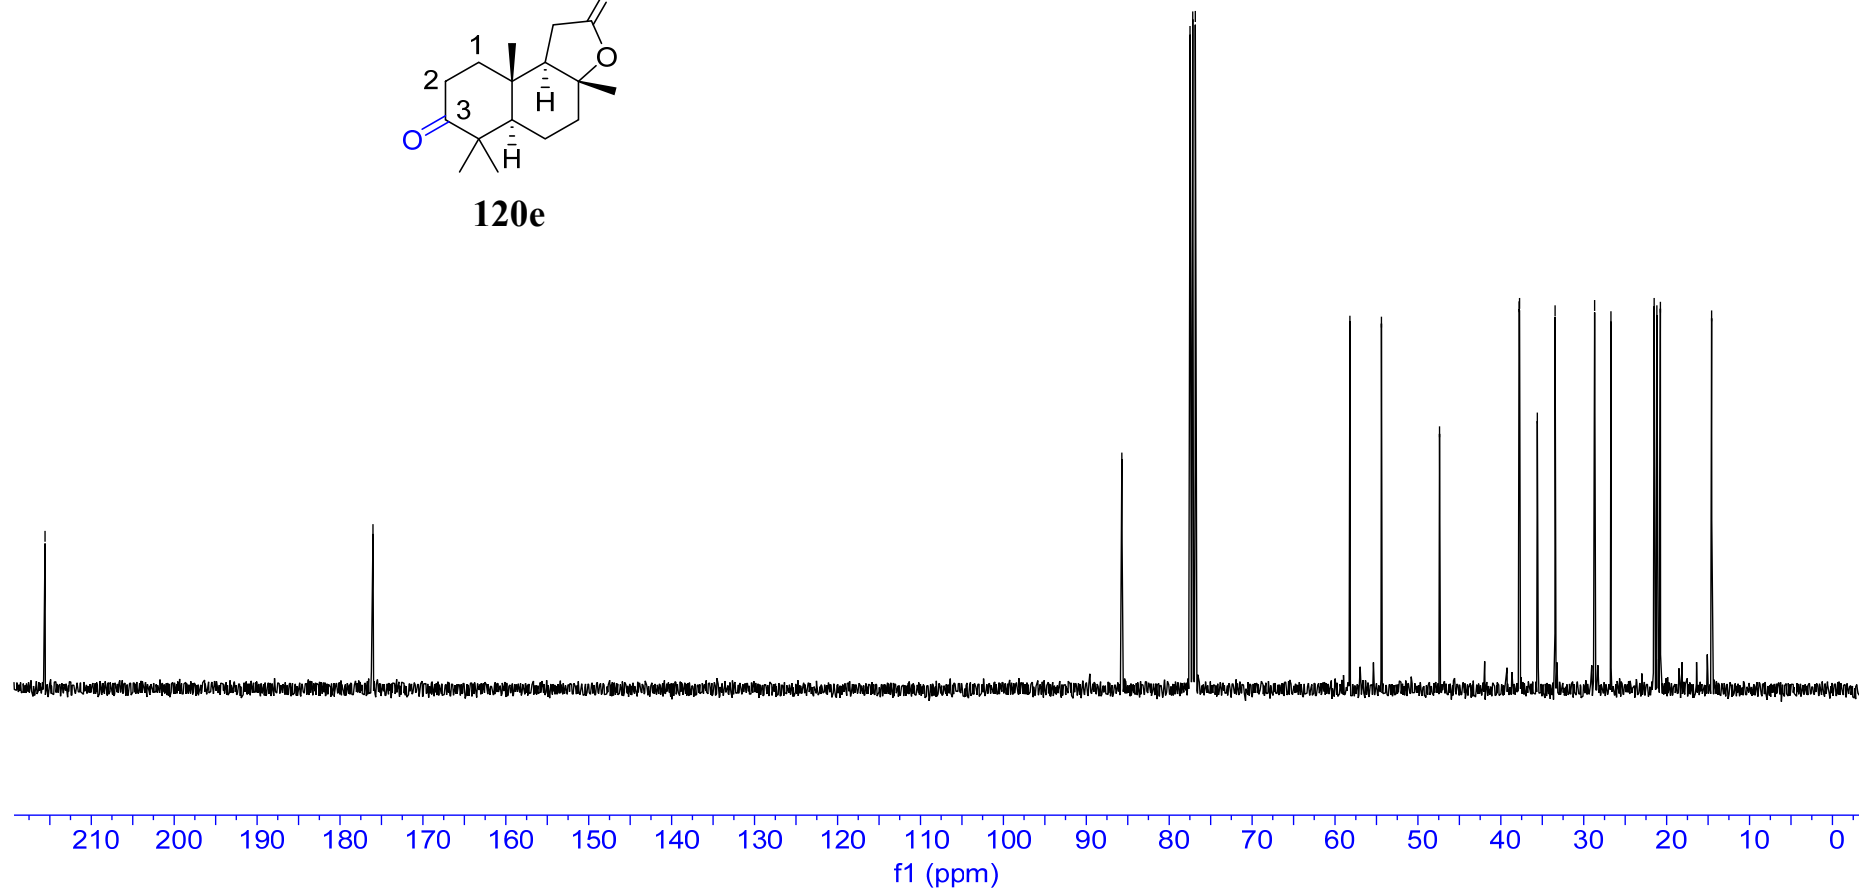

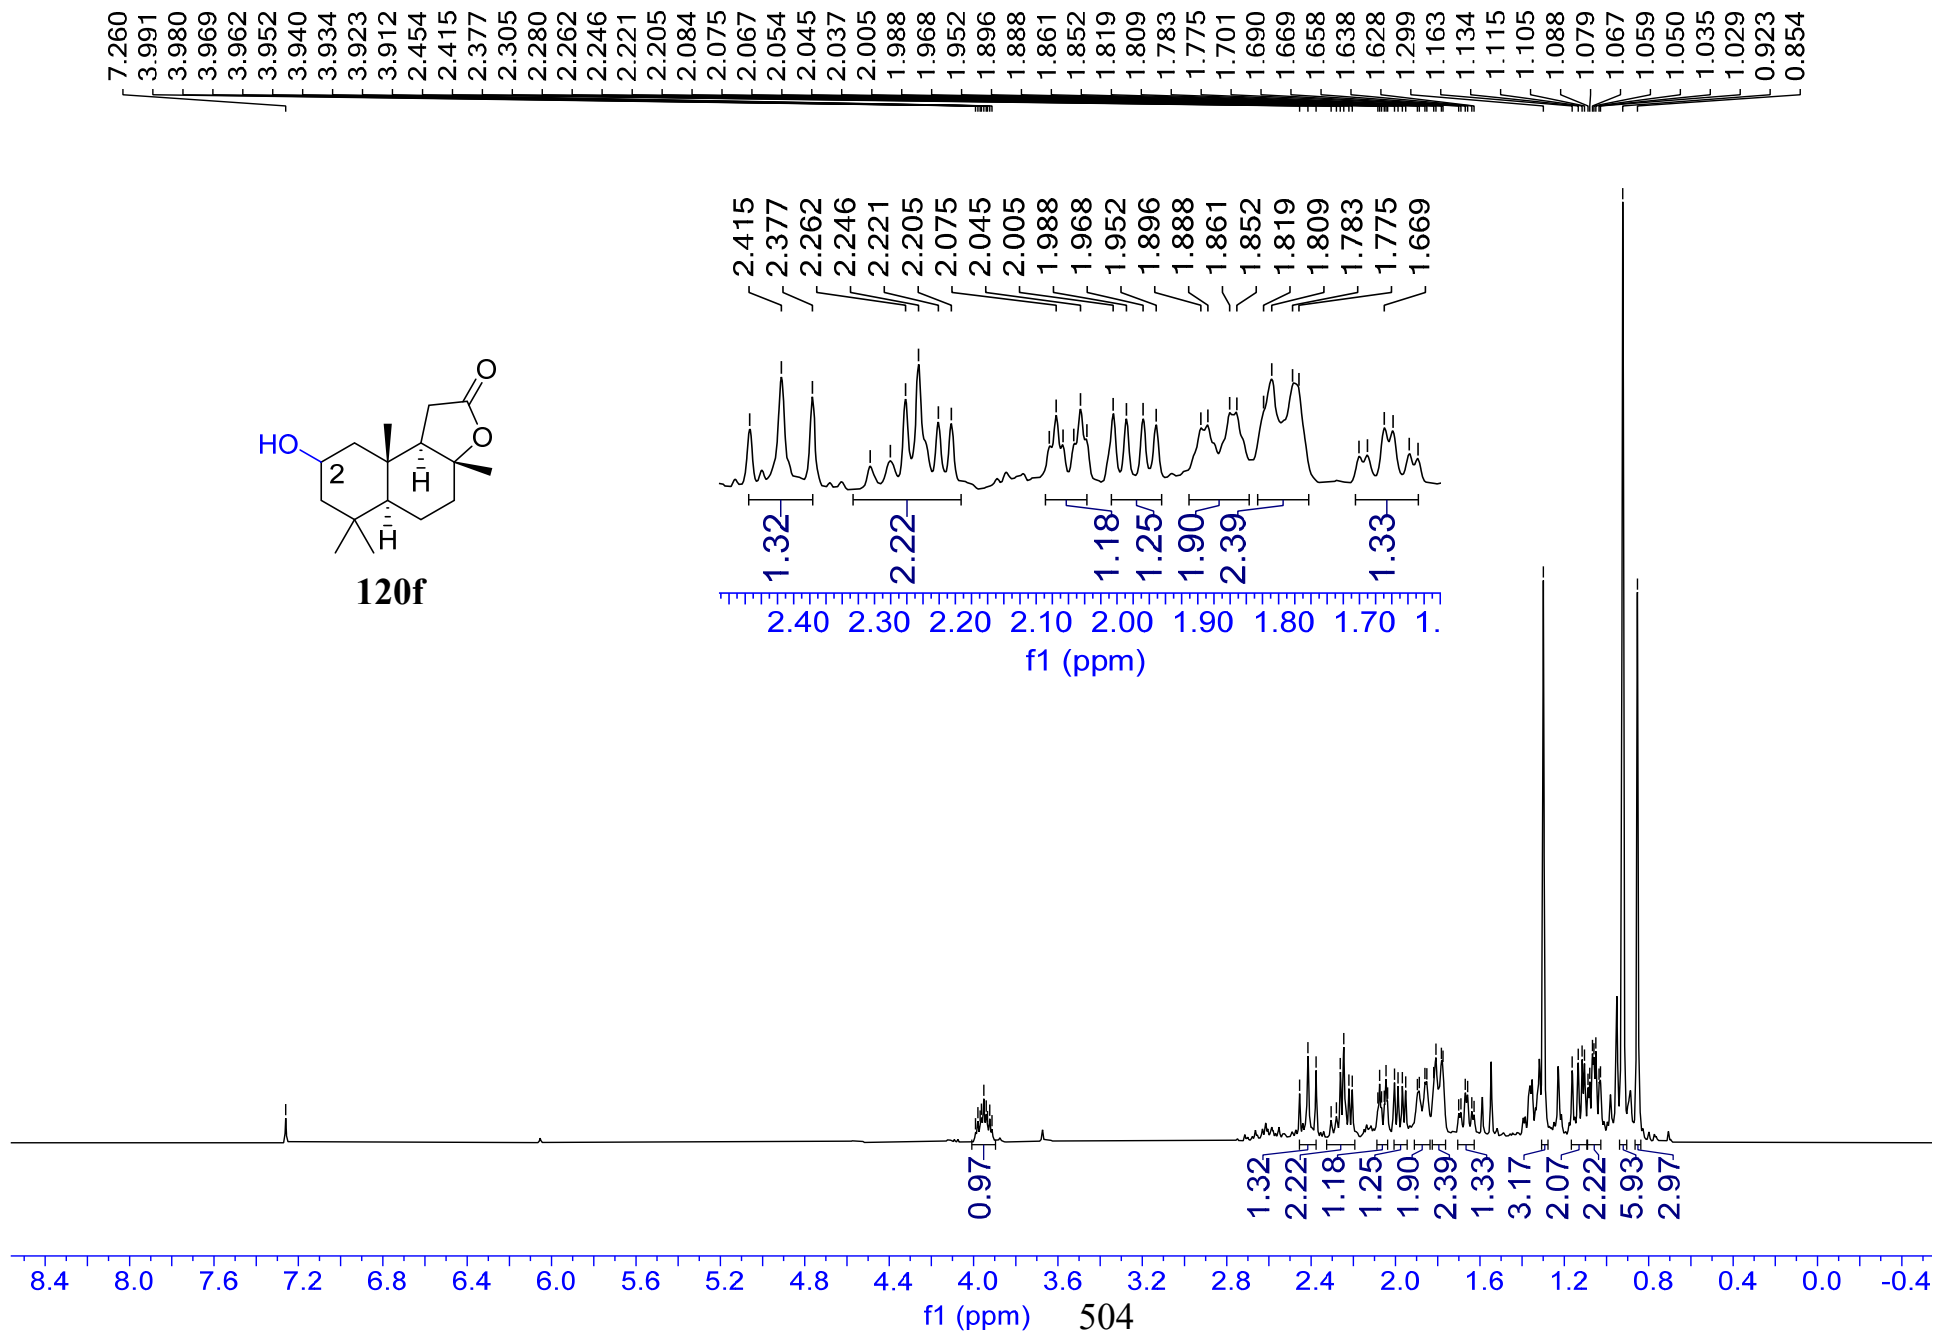

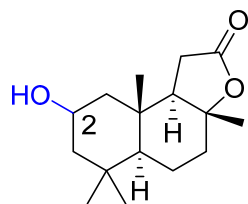

**120f**

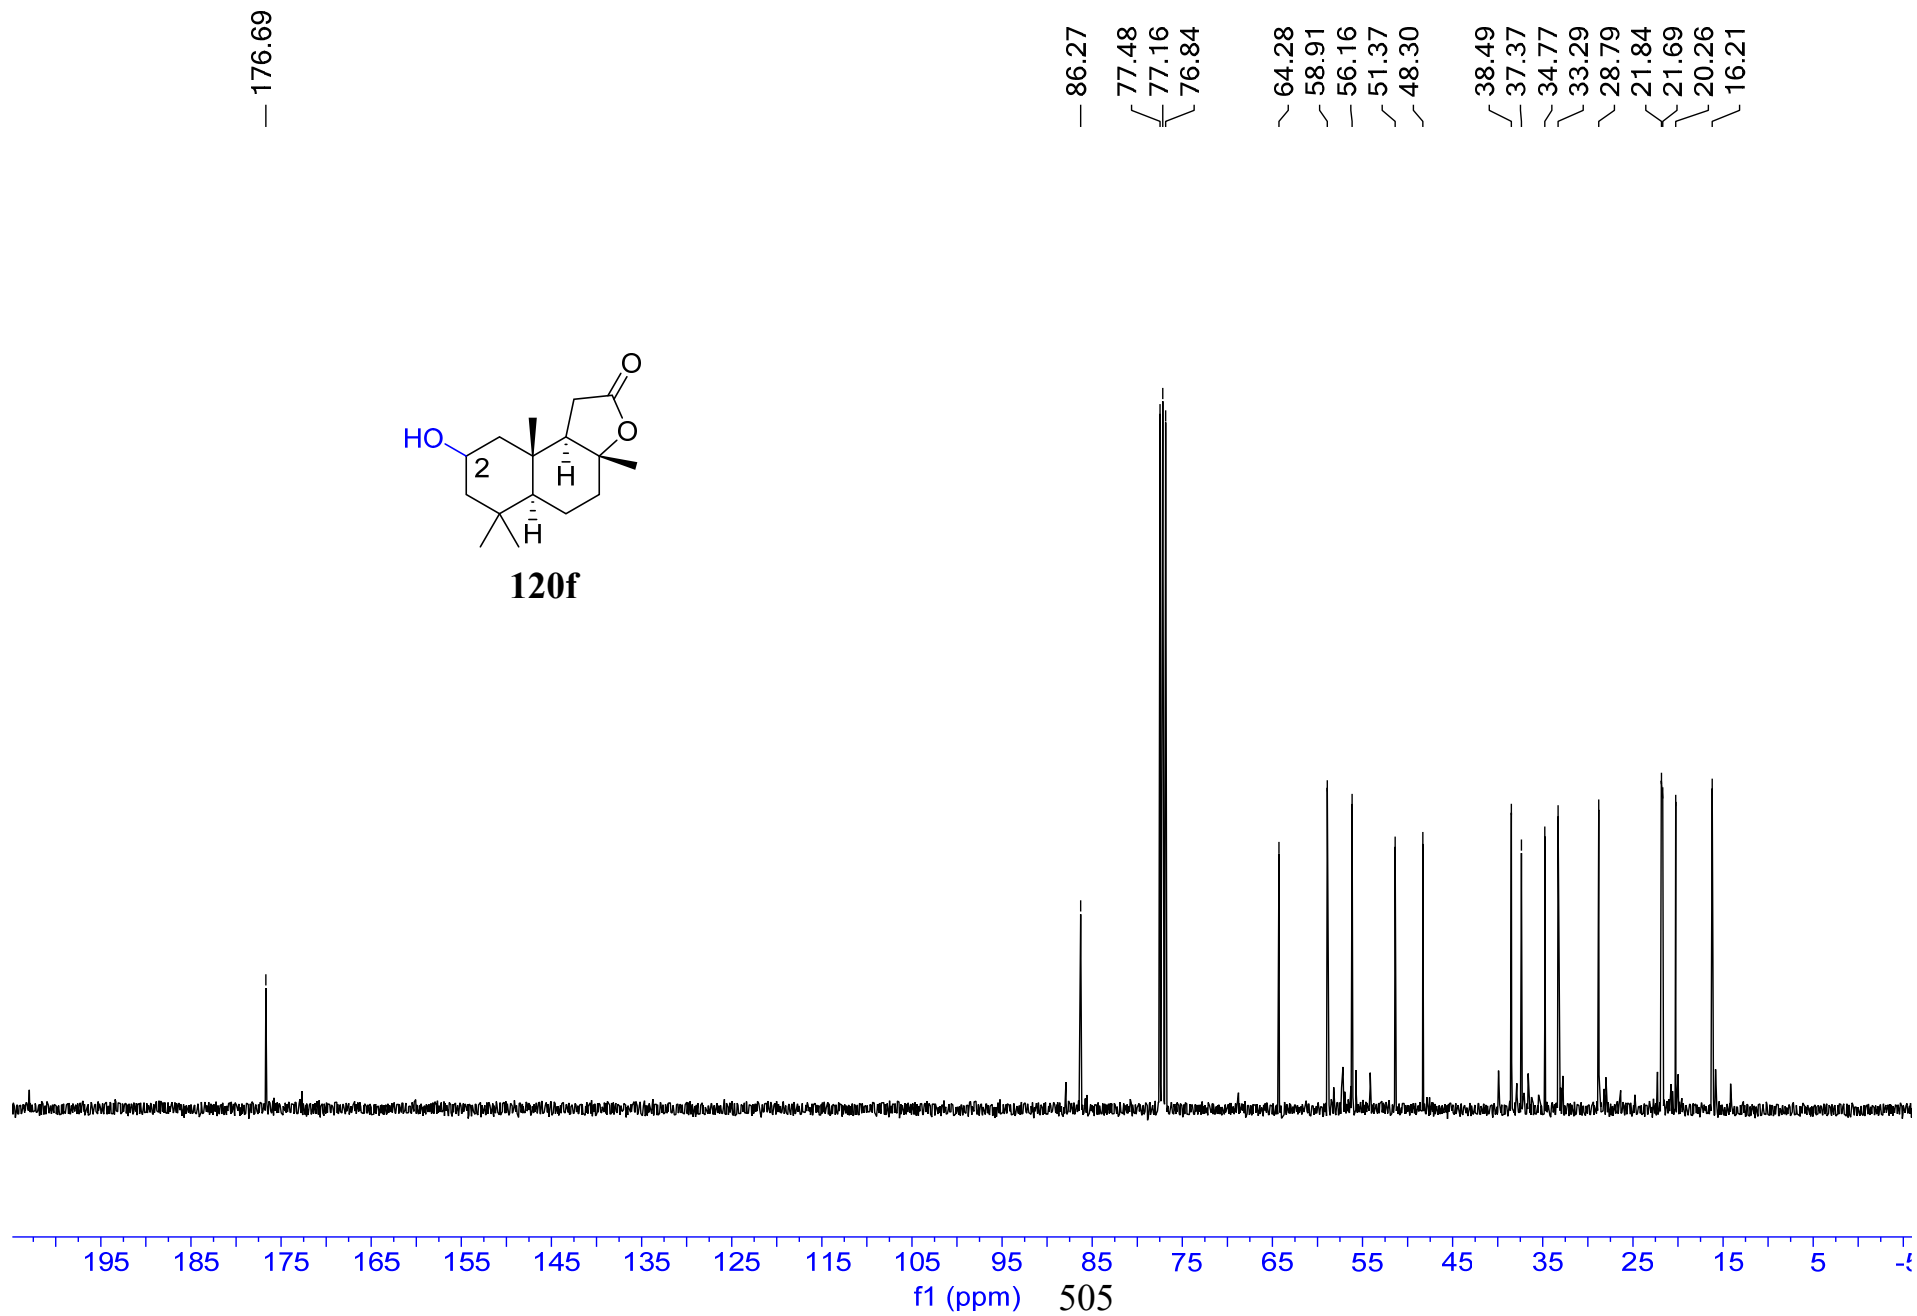

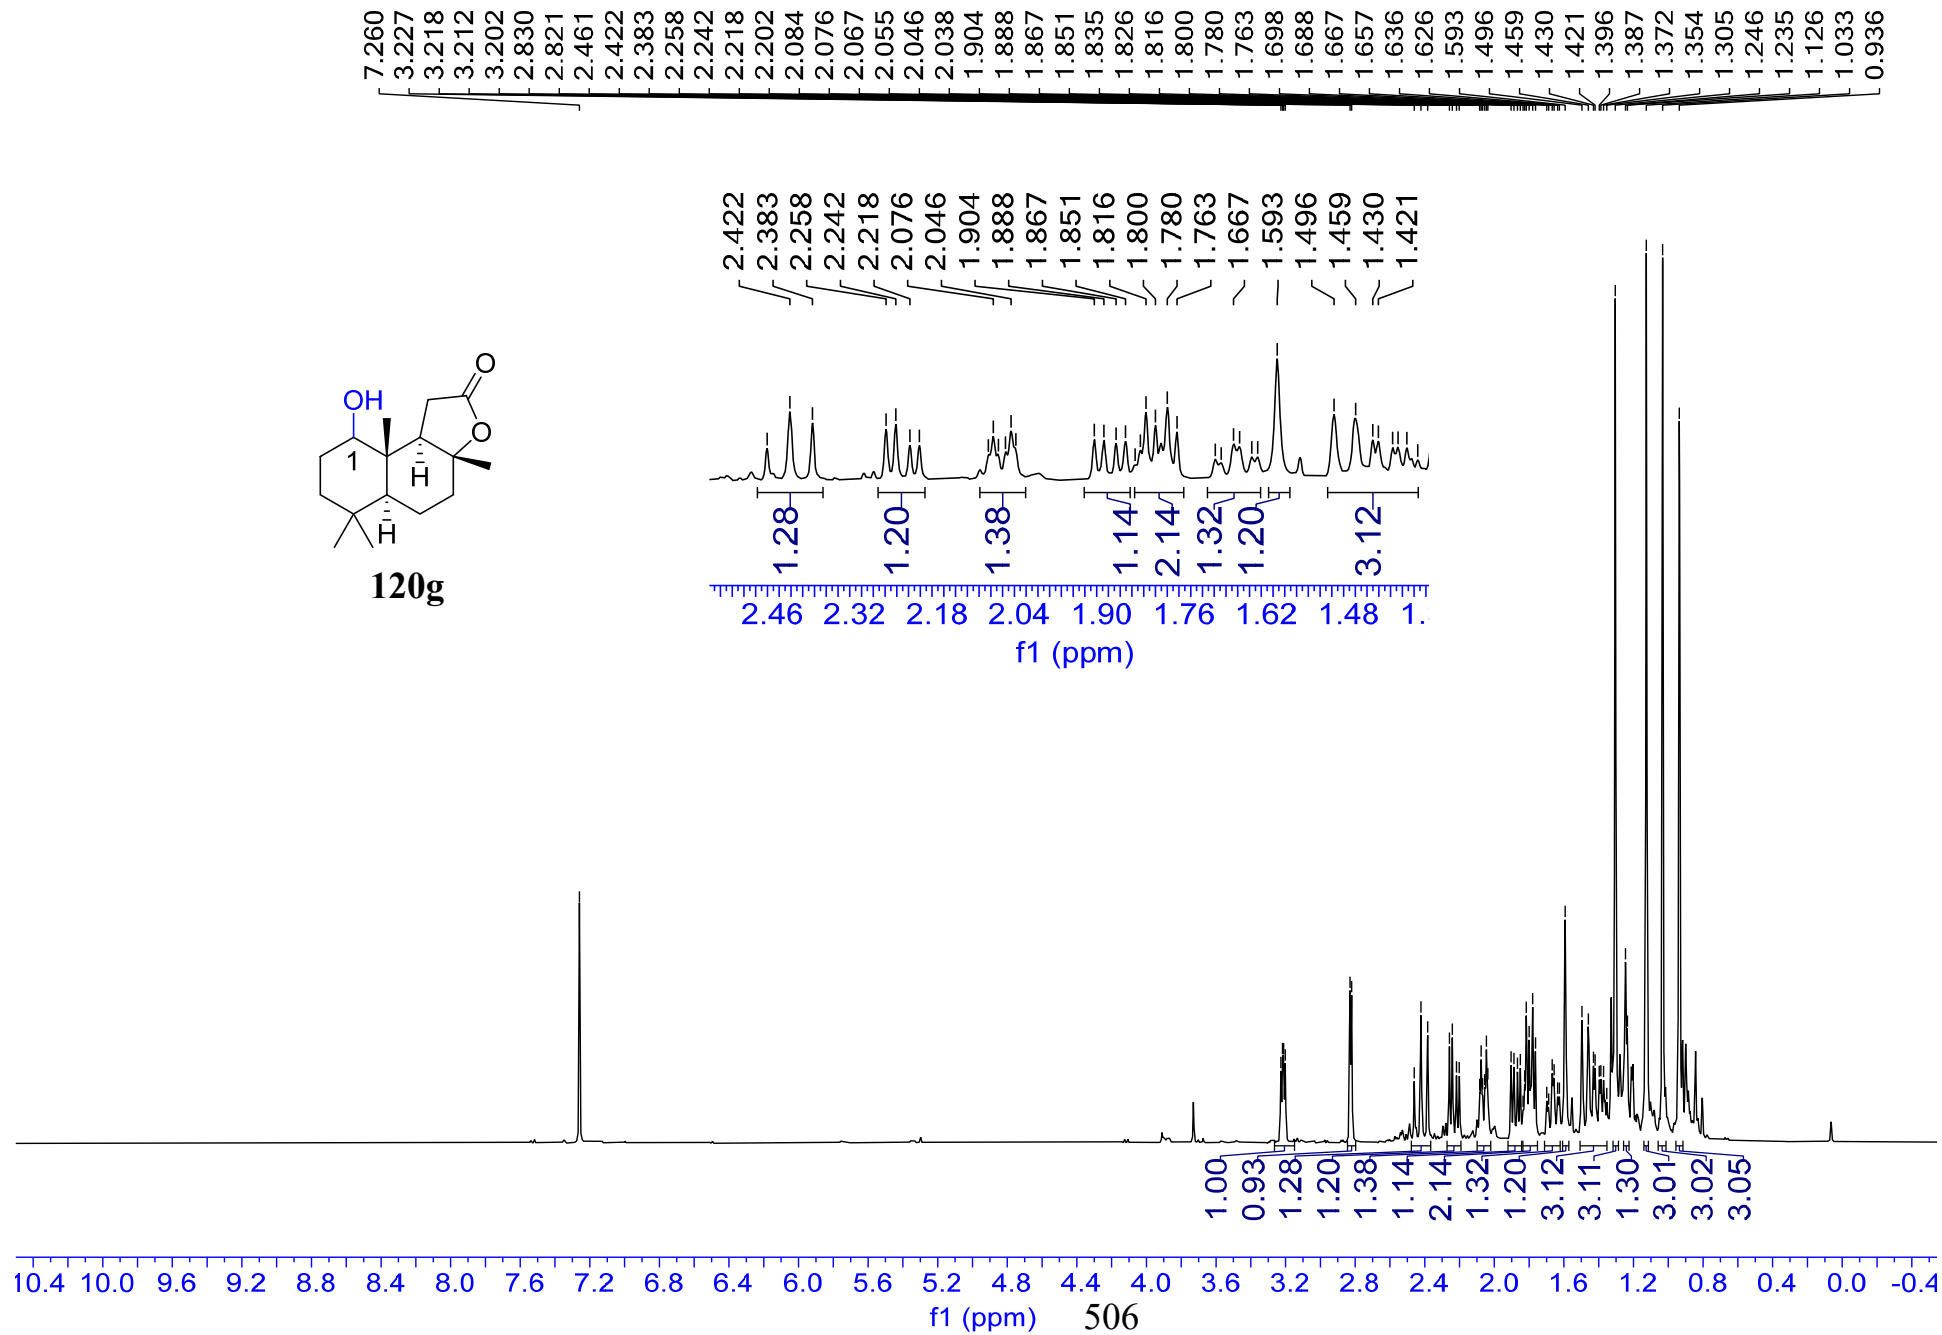

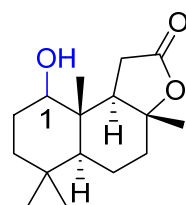

120g

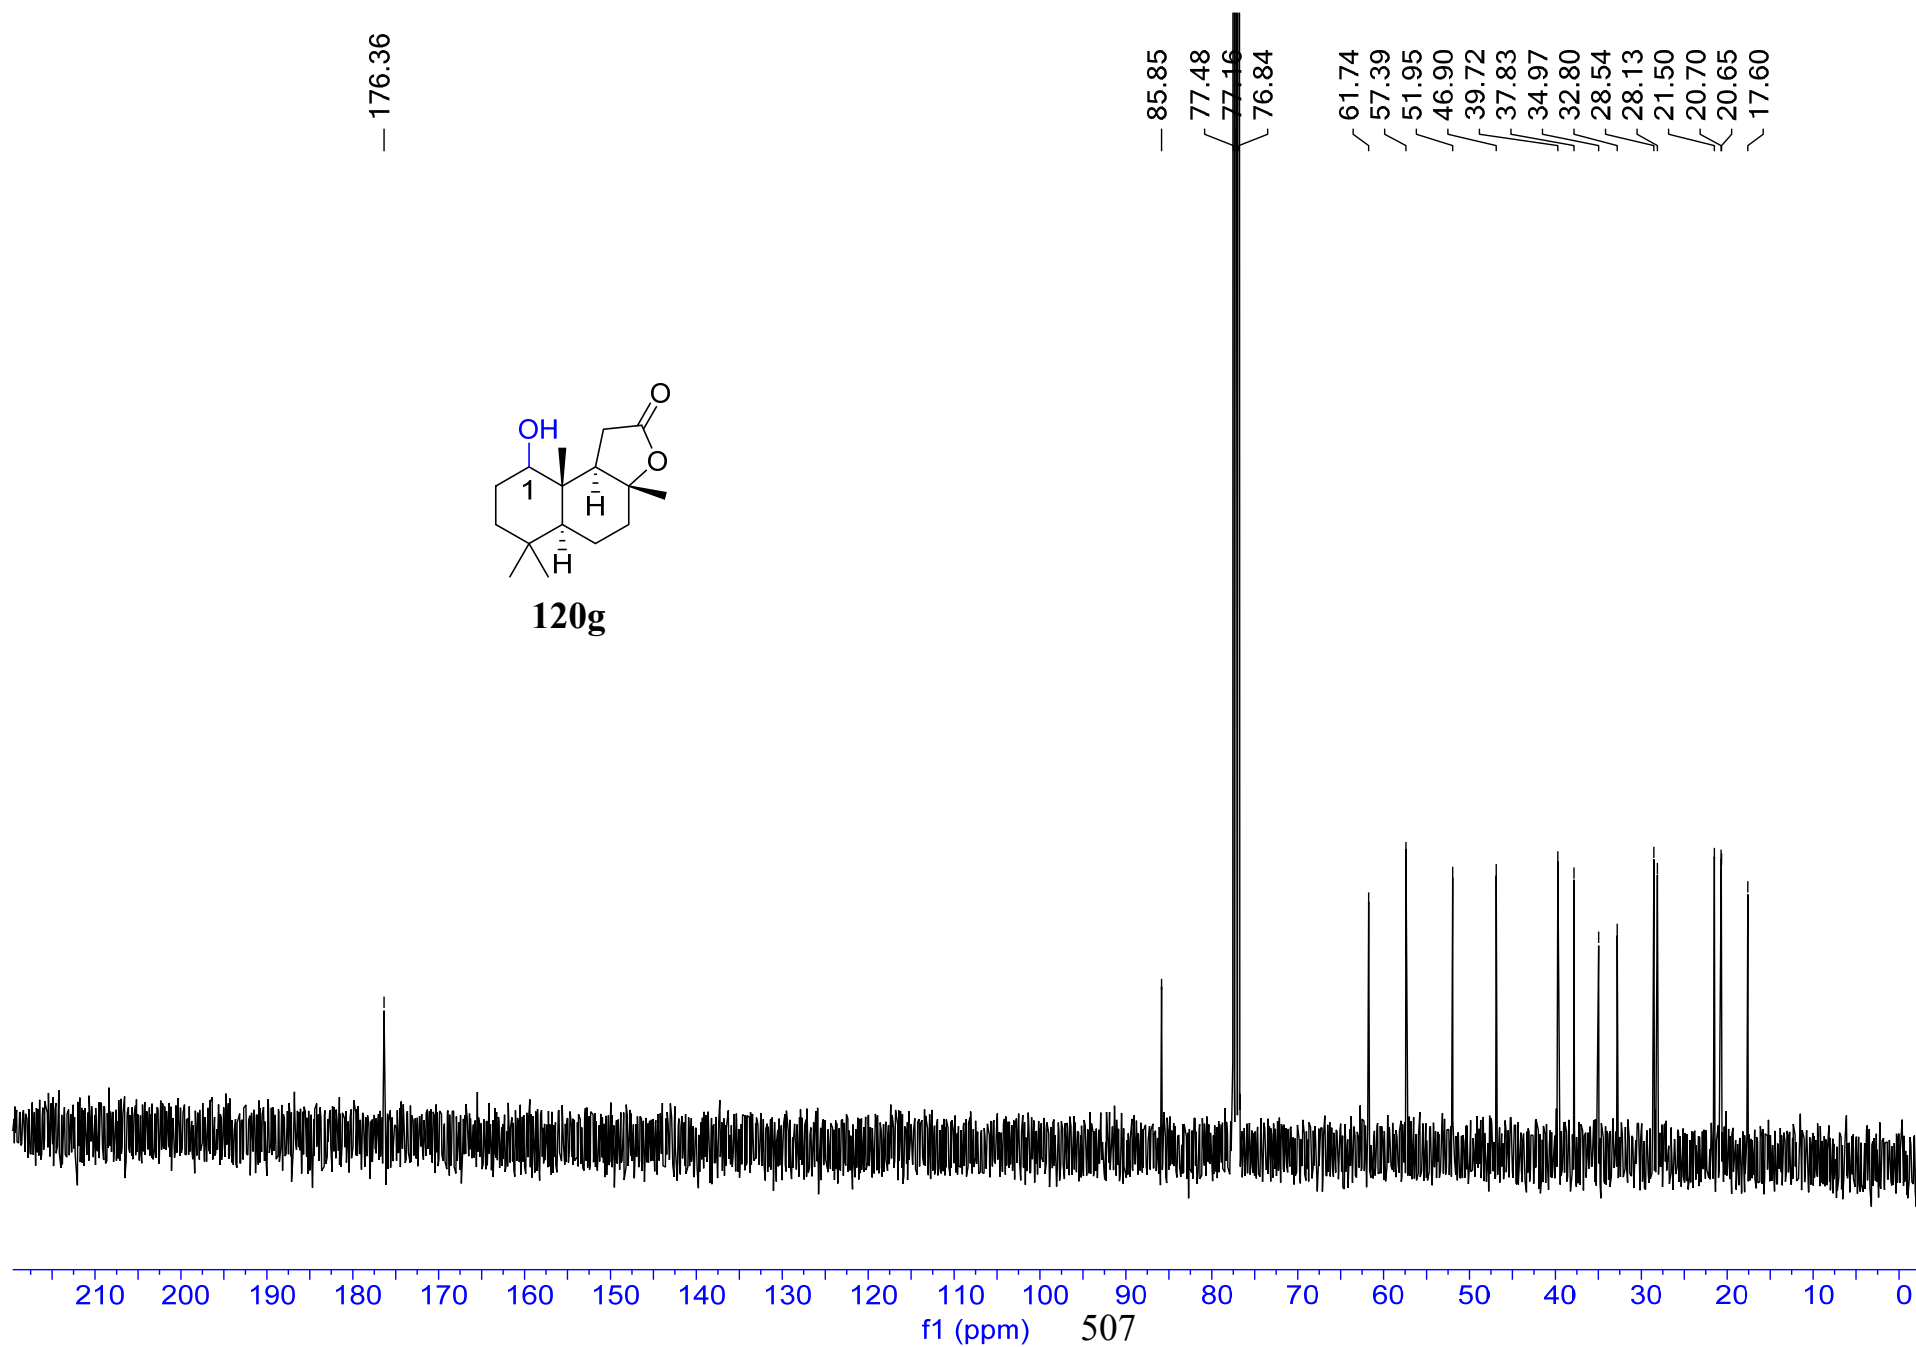

<sup>1</sup>H NMR, 400 MHz, CDCl<sub>3</sub>

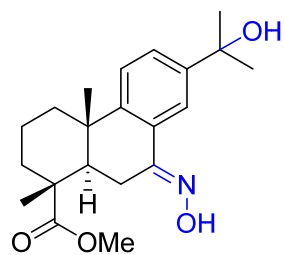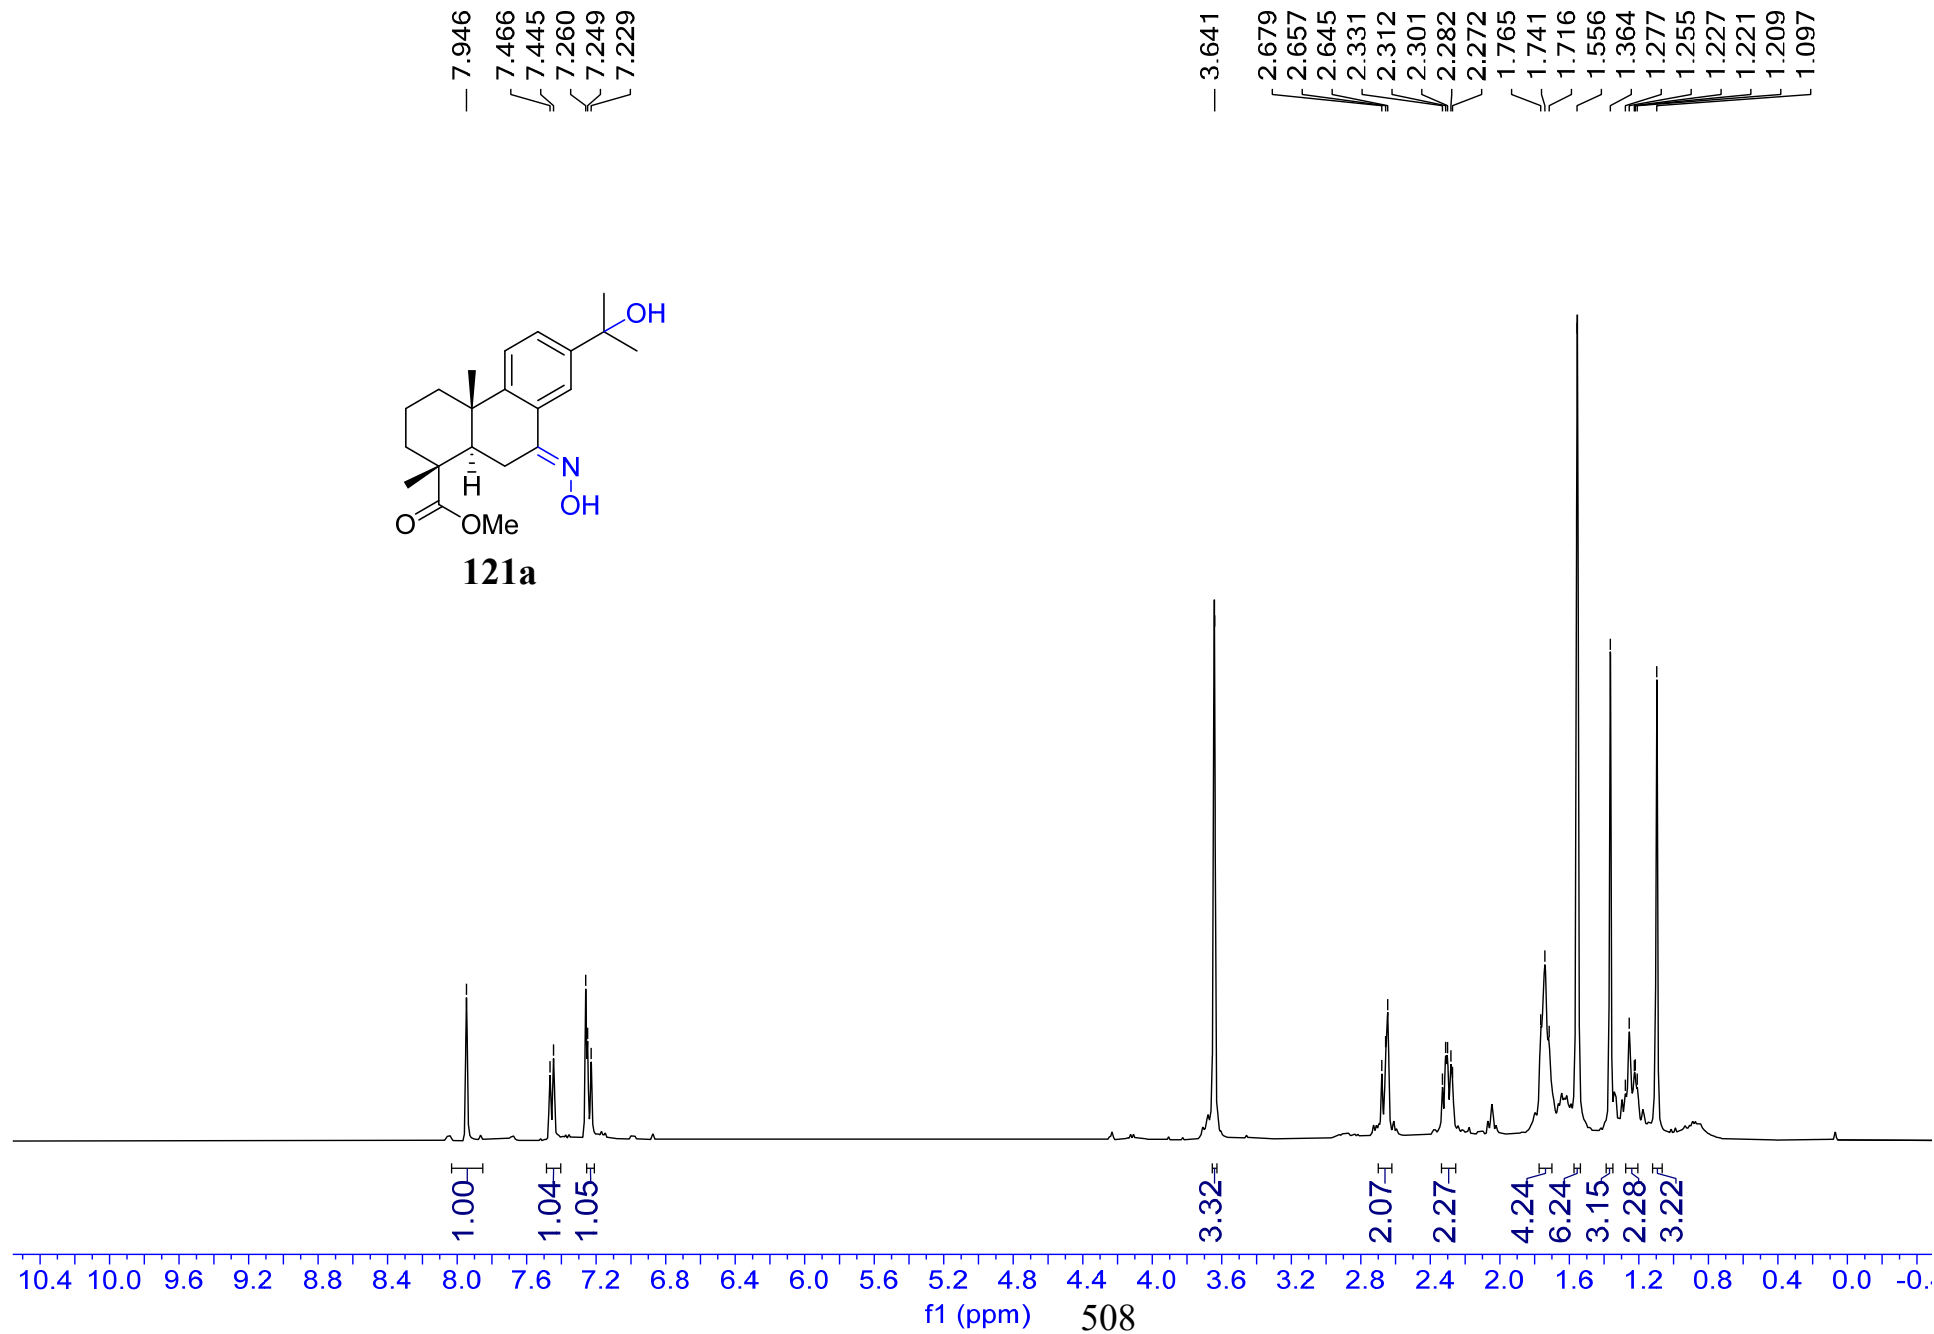



<sup>13</sup>C NMR 101 MHz, CDCl<sub>3</sub>



**121a**

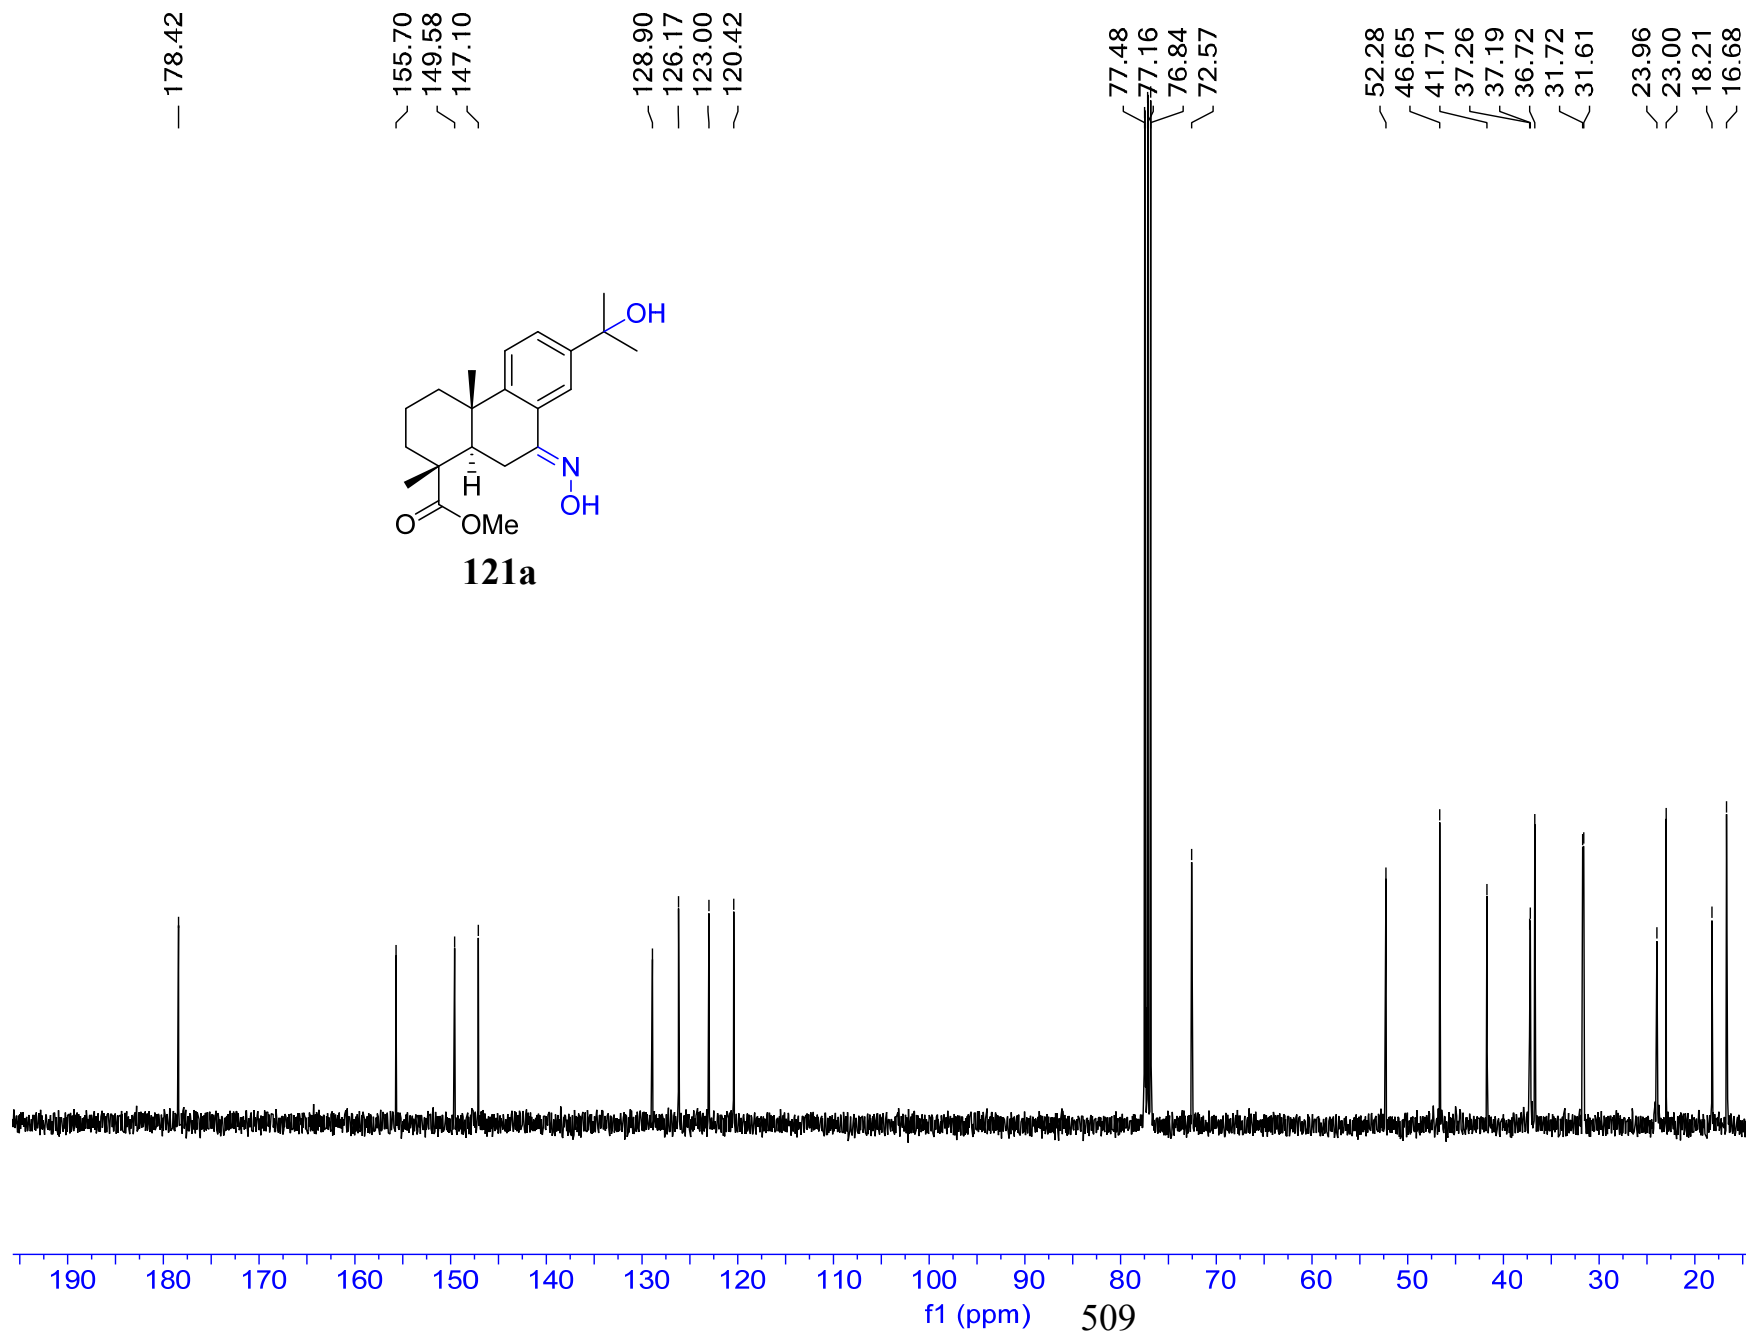

<sup>1</sup>H NMR, 400 MHz, CDCl<sub>3</sub>

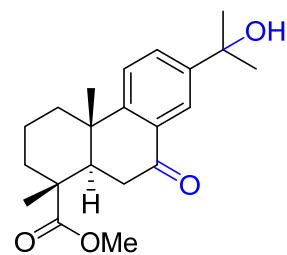

**121b**

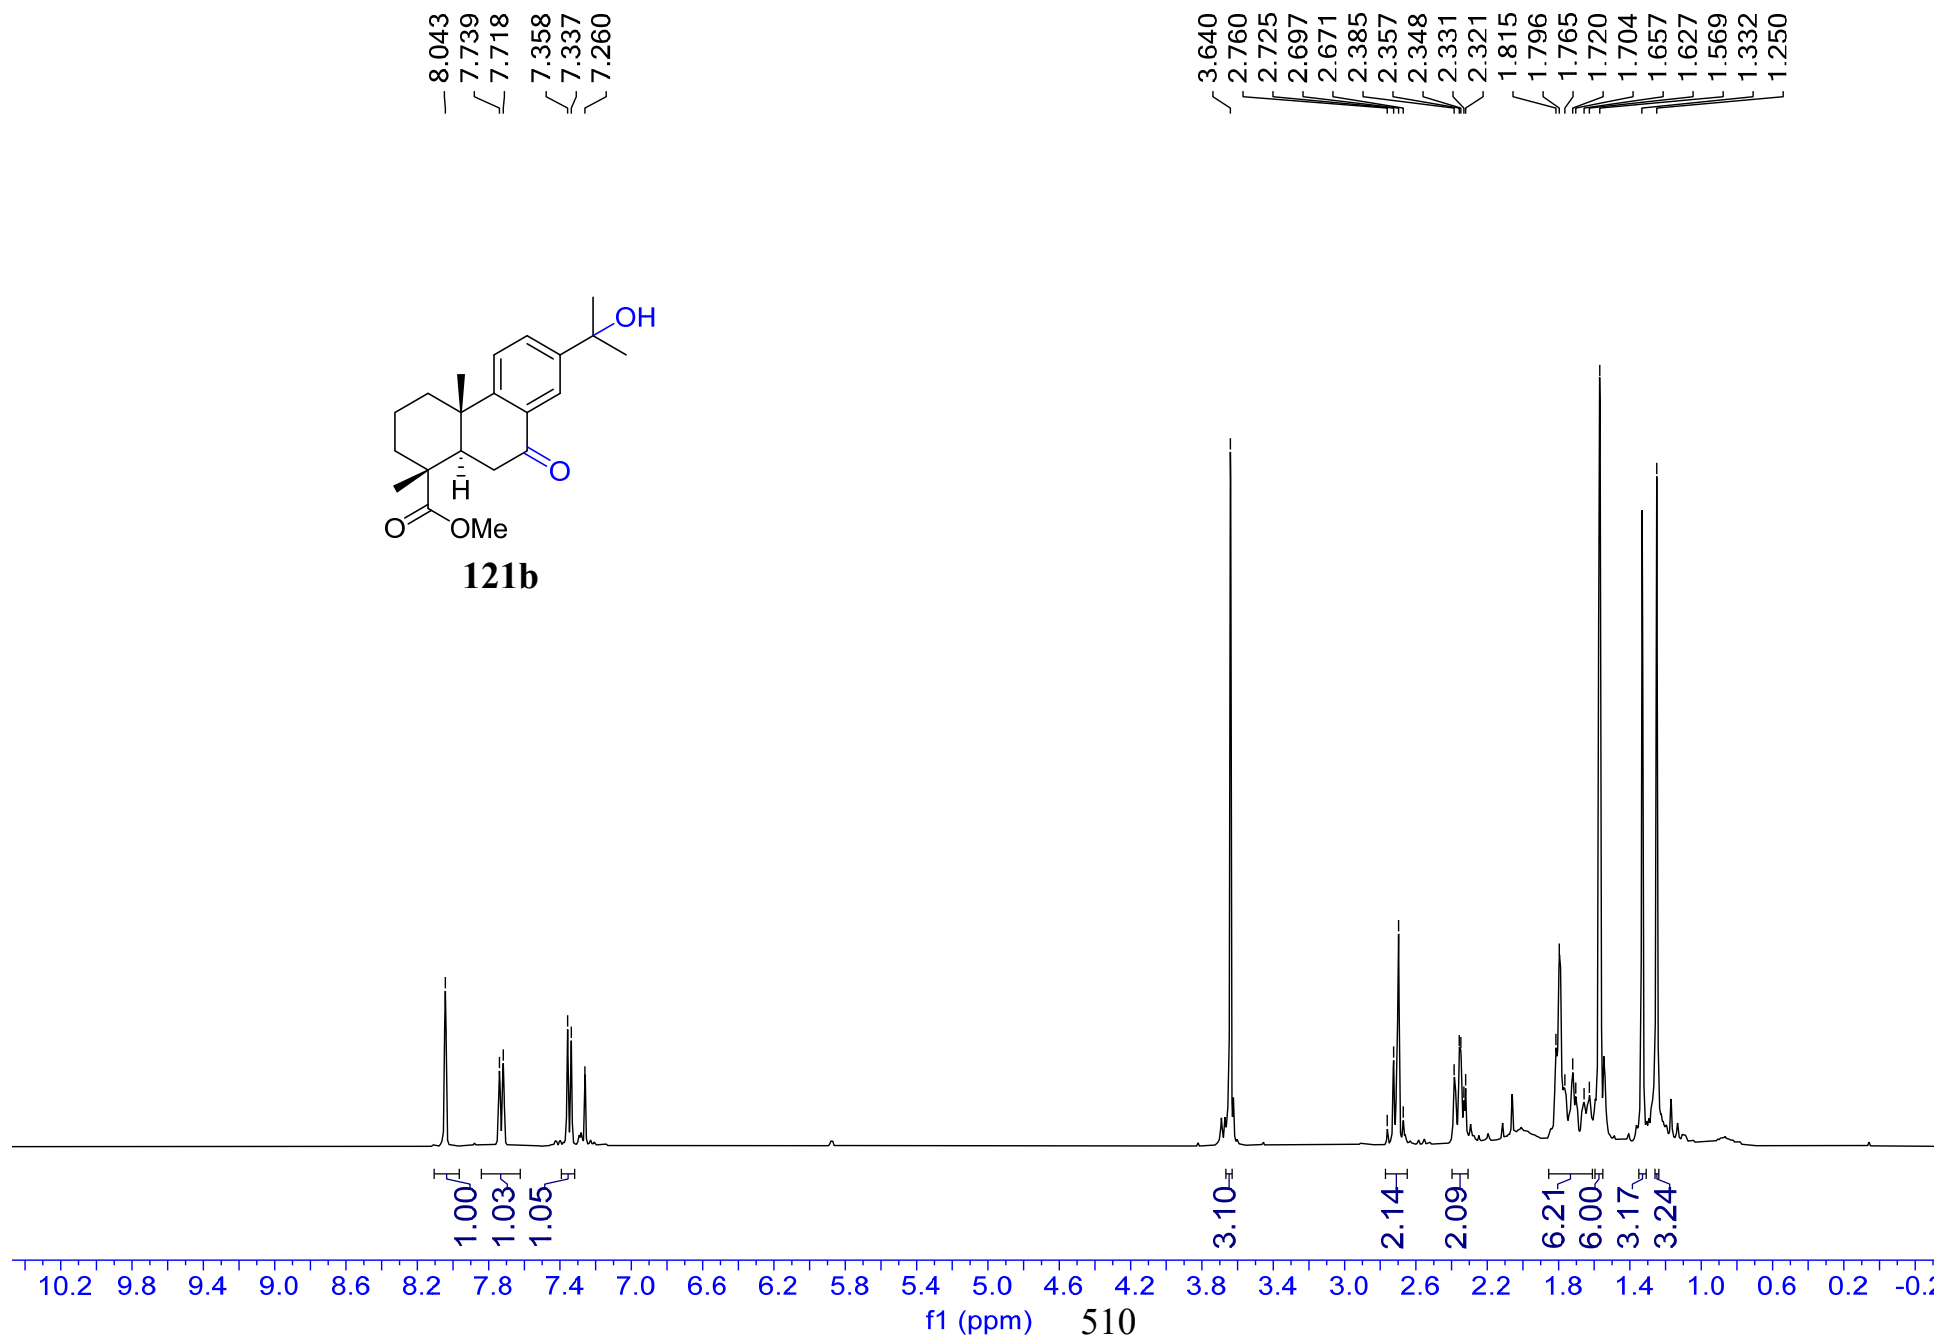

$^{13}\text{C}$  NMR 101 MHz,  $\text{CDCl}_3$



**121b**

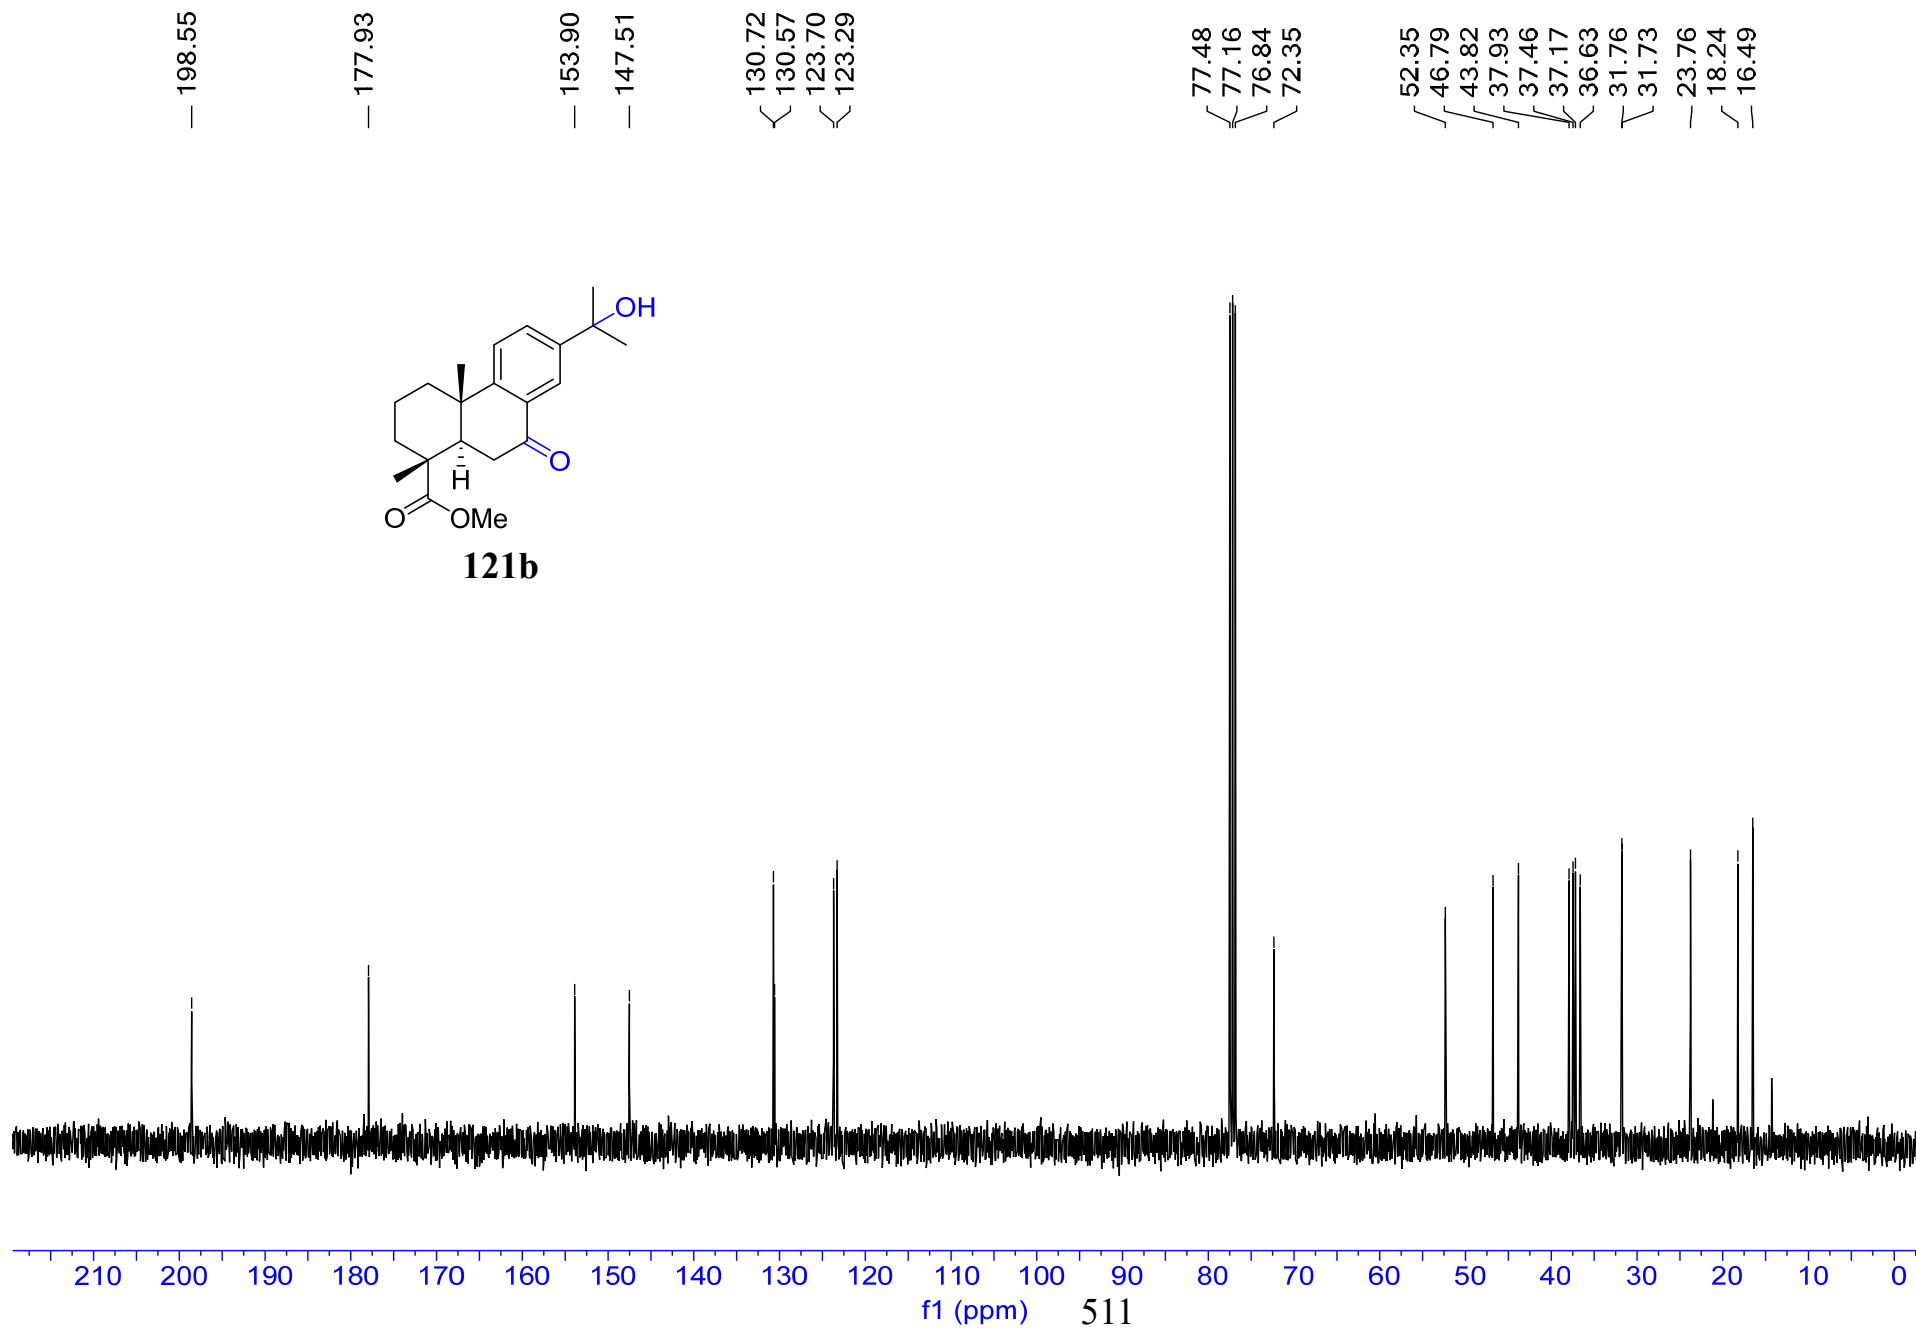

<sup>1</sup>H NMR, 400 MHz, DMSO-d<sub>6</sub>

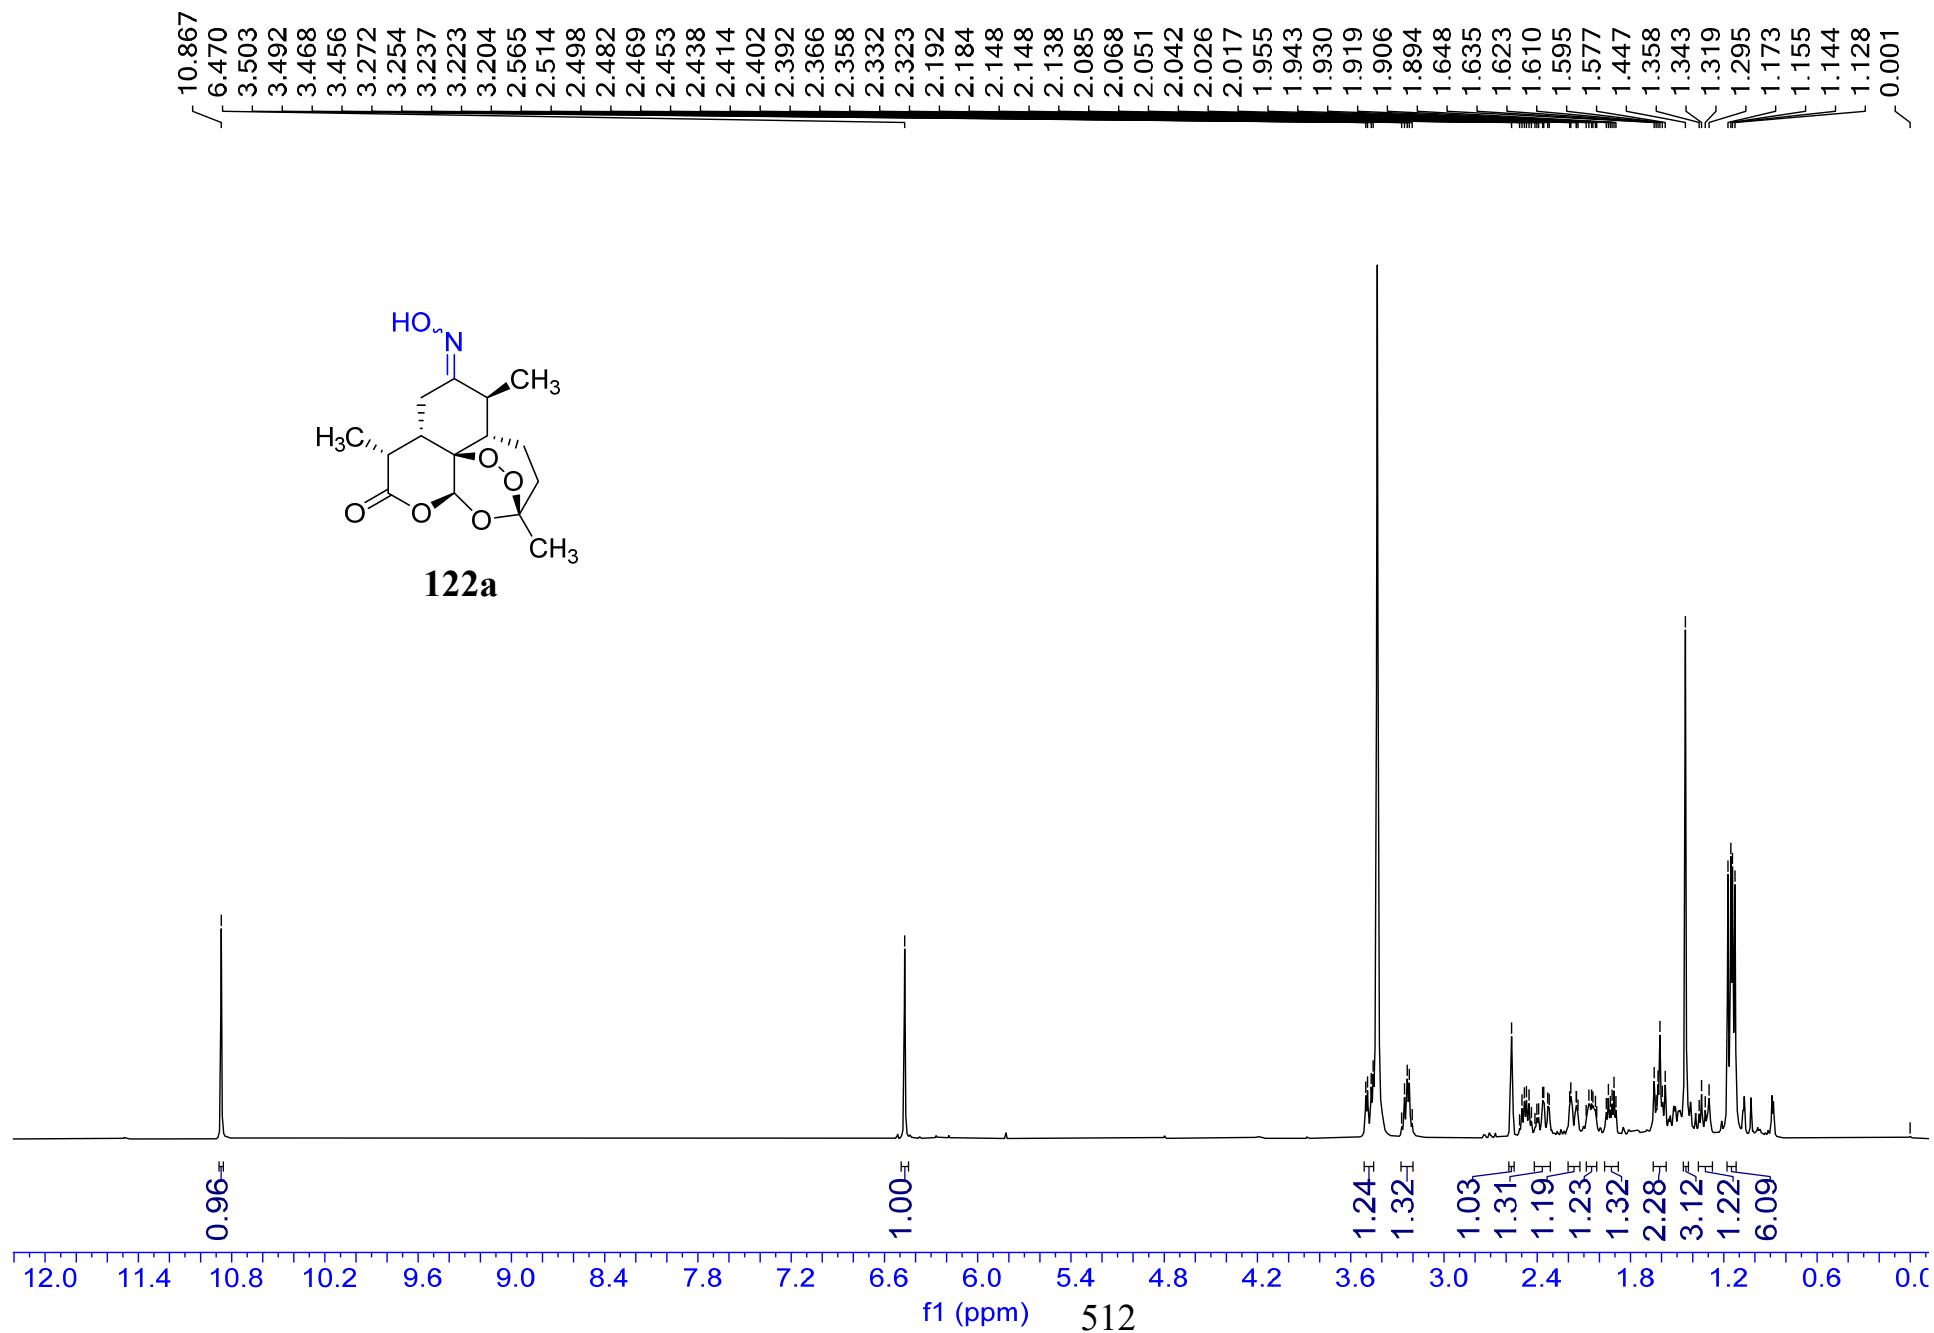

<sup>13</sup>C NMR 101 MHz, DMSO-d<sub>6</sub>

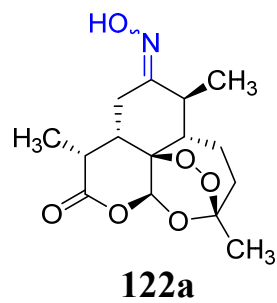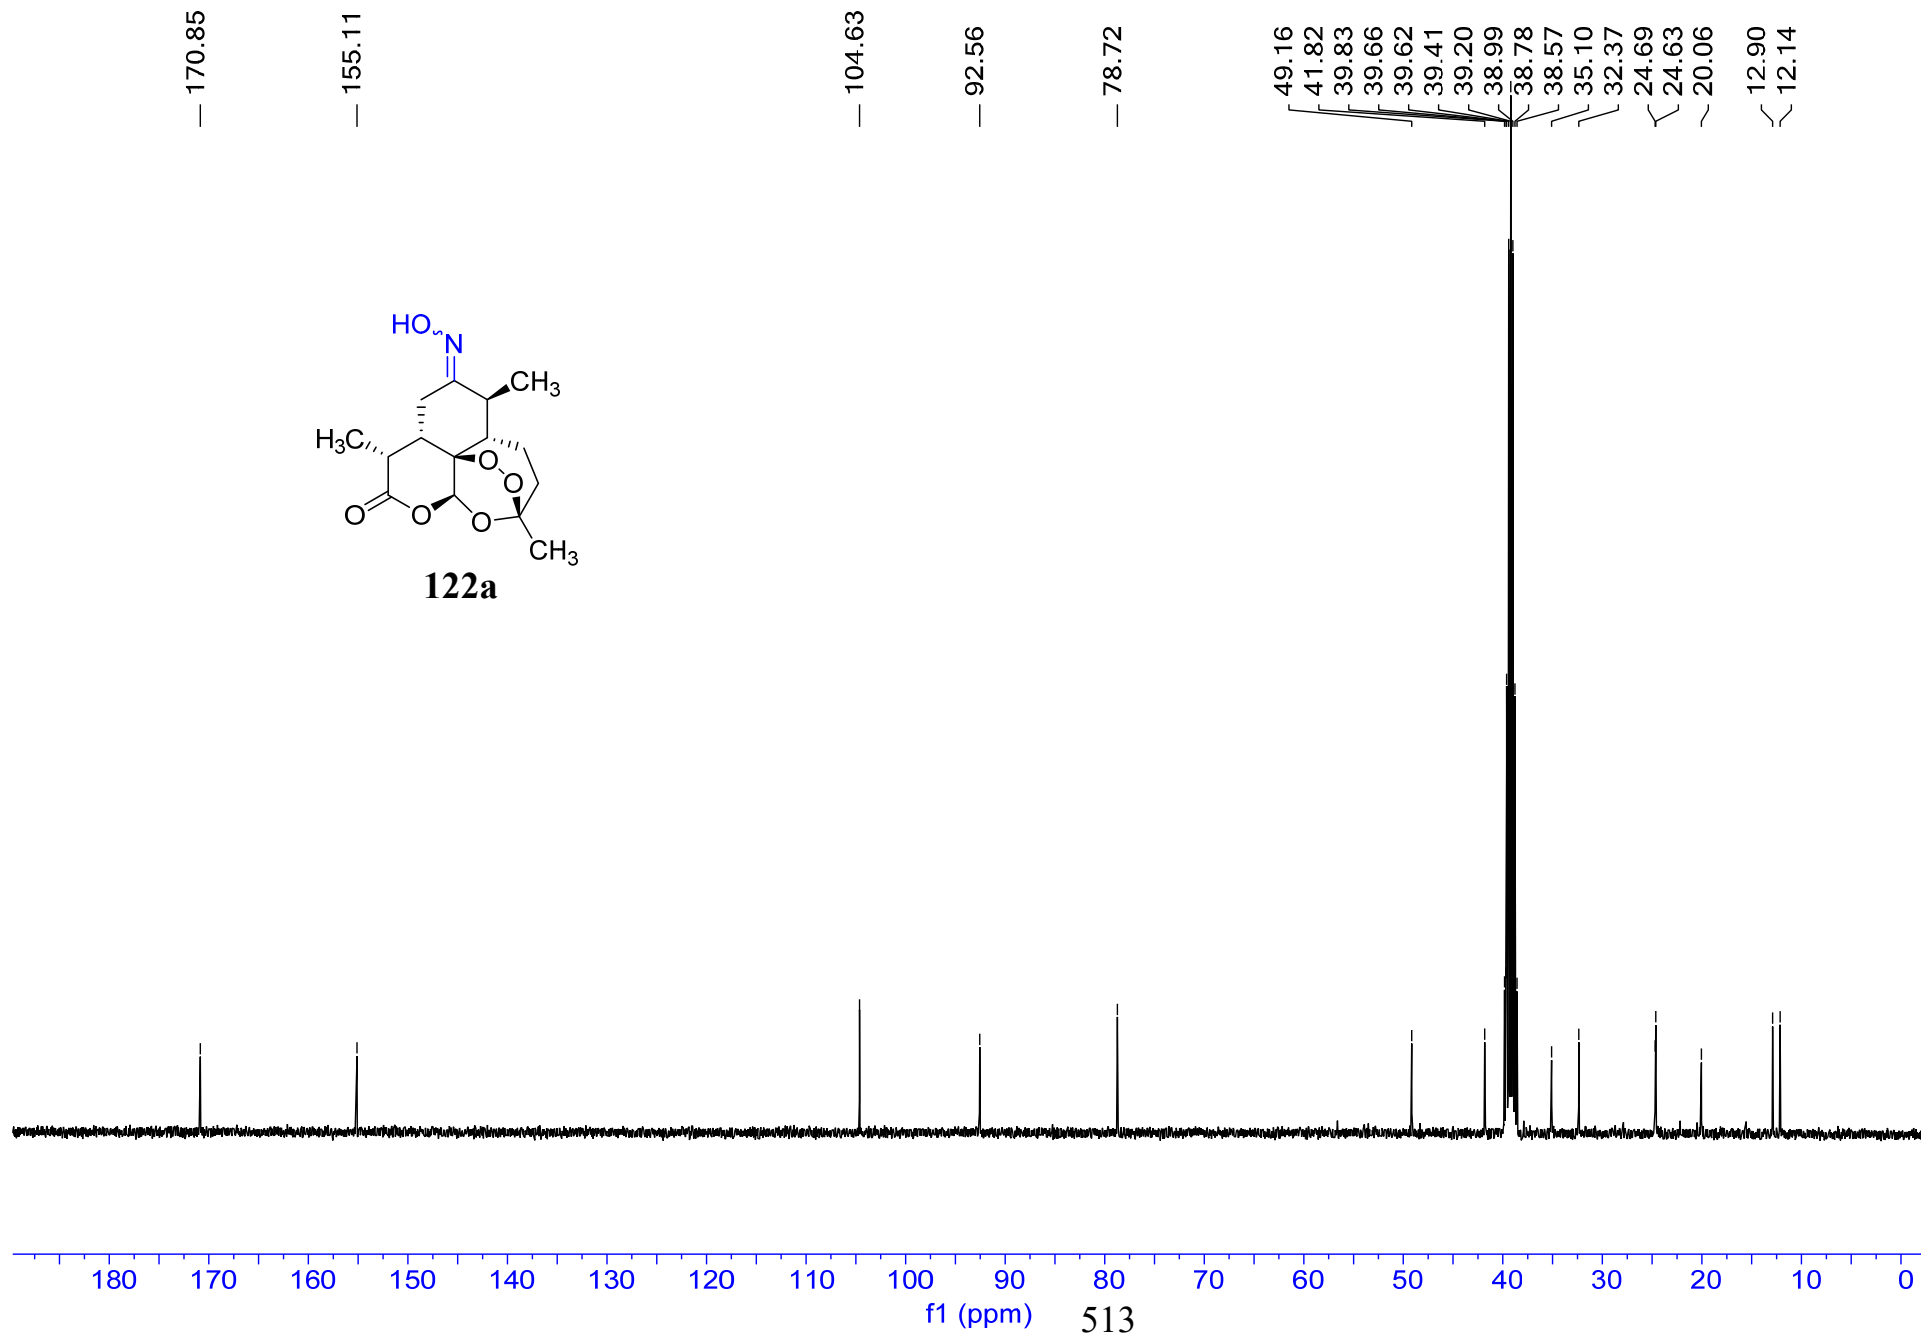

## 16. HPLC Traces

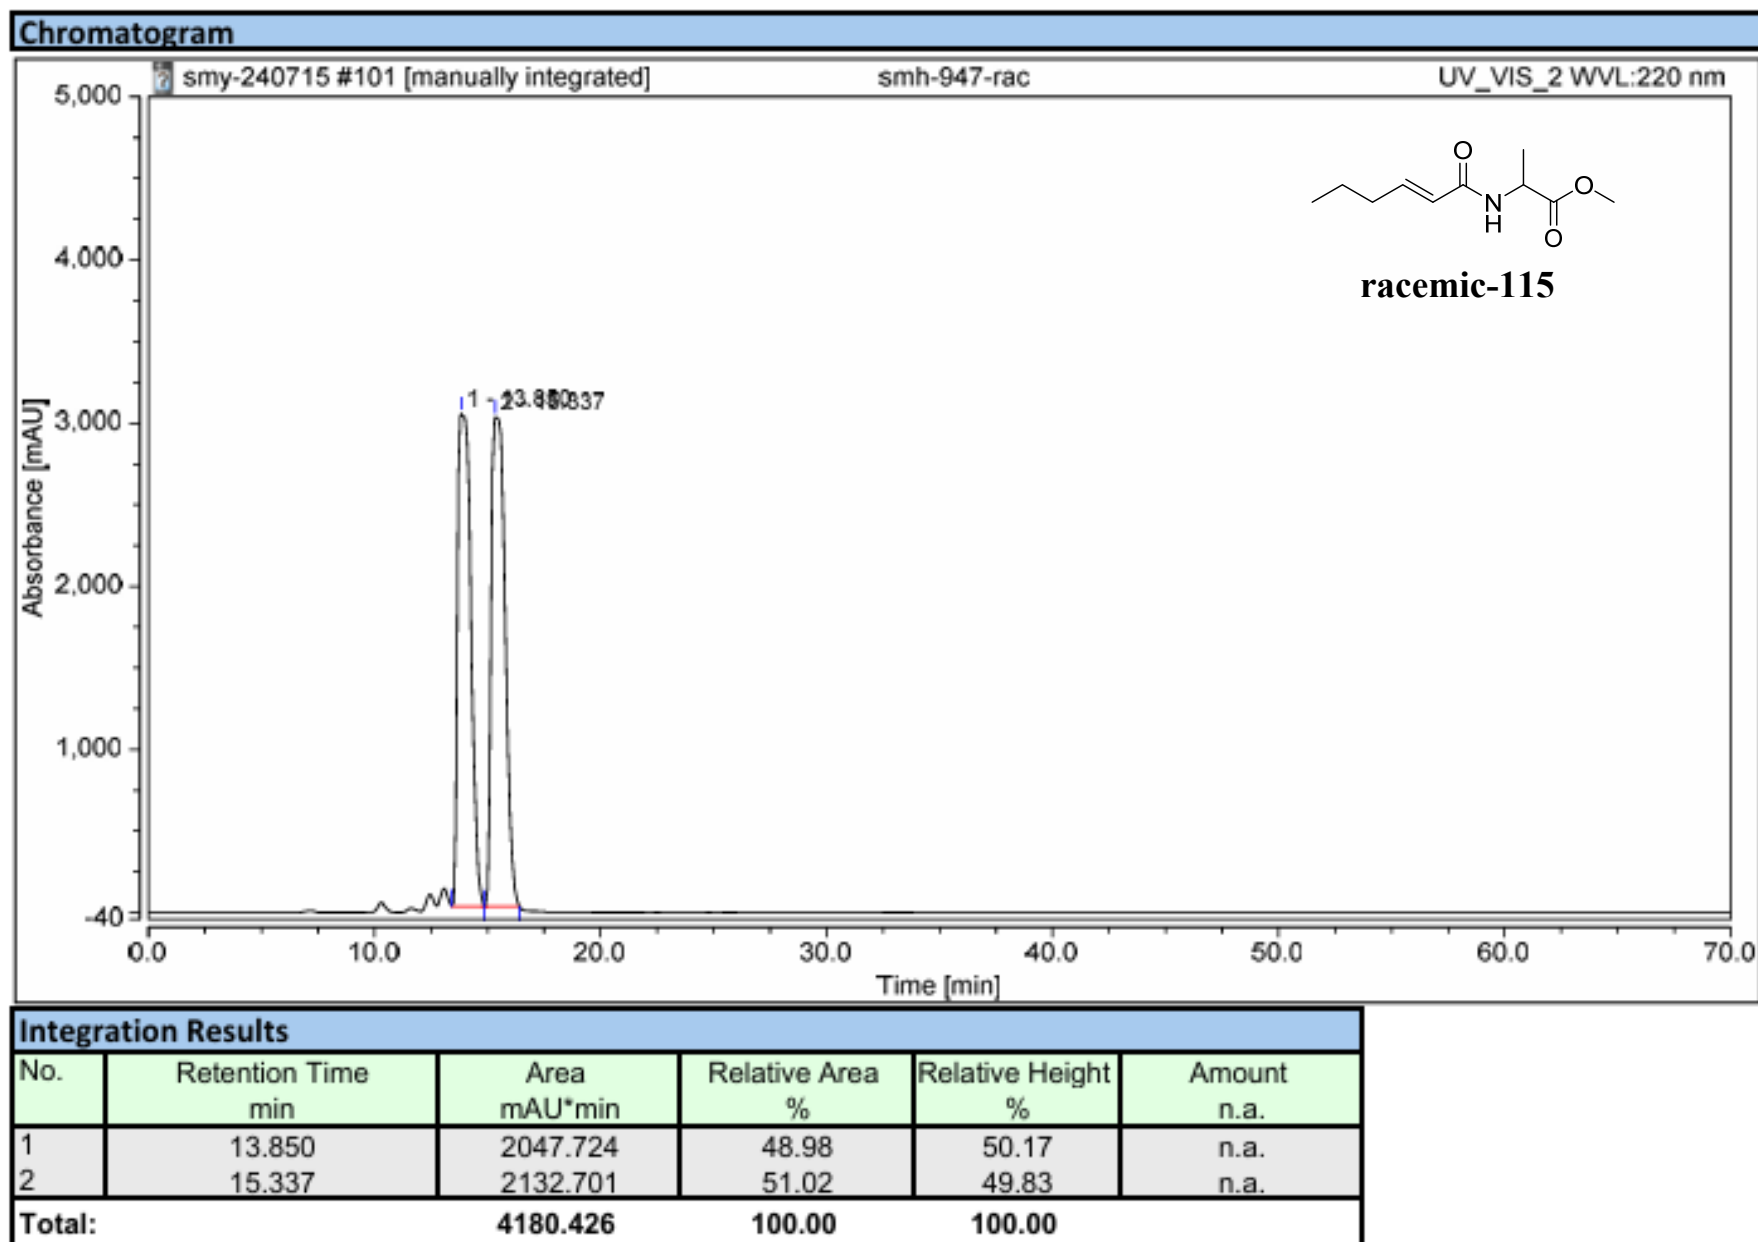

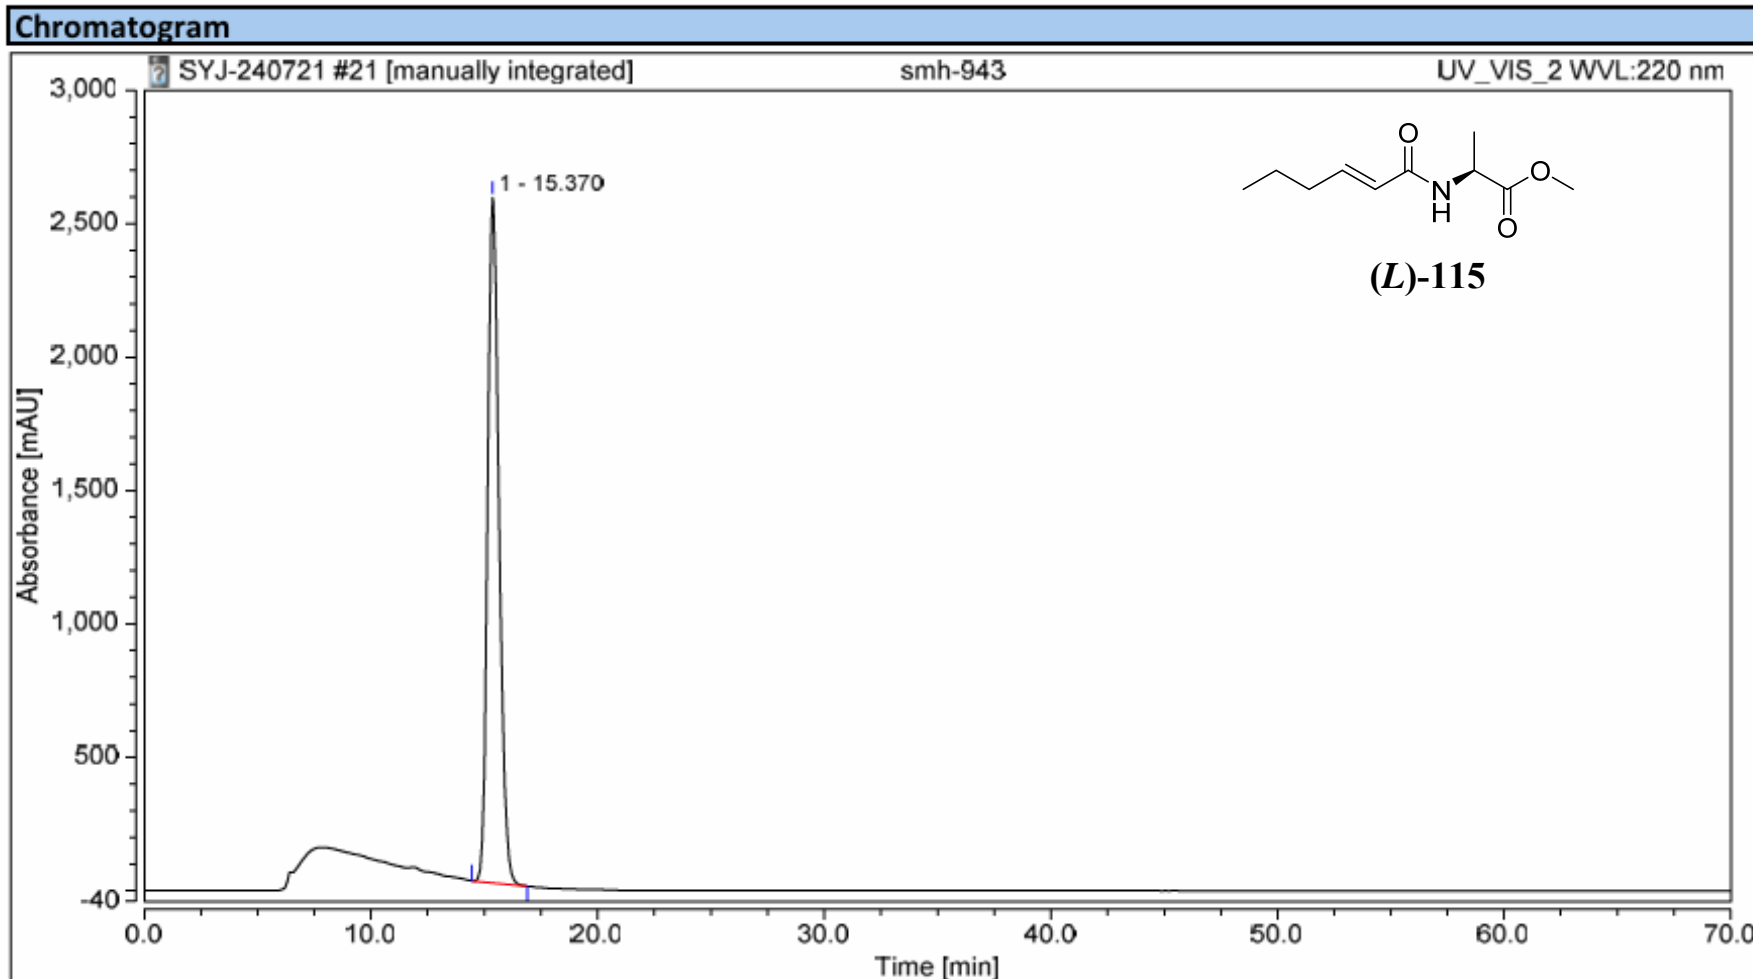

| Integration Results |                       |                 |                    |                      |                |
|---------------------|-----------------------|-----------------|--------------------|----------------------|----------------|
| No.                 | Retention Time<br>min | Area<br>mAU*min | Relative Area<br>% | Relative Height<br>% | Amount<br>n.a. |
| 1                   | 15.370                | 1507.230        | 100.00             | 100.00               | n.a.           |
| Total:              |                       | 1507.230        | 100.00             | 100.00               |                |

| Chromatogram |
|--------------|
|--------------|

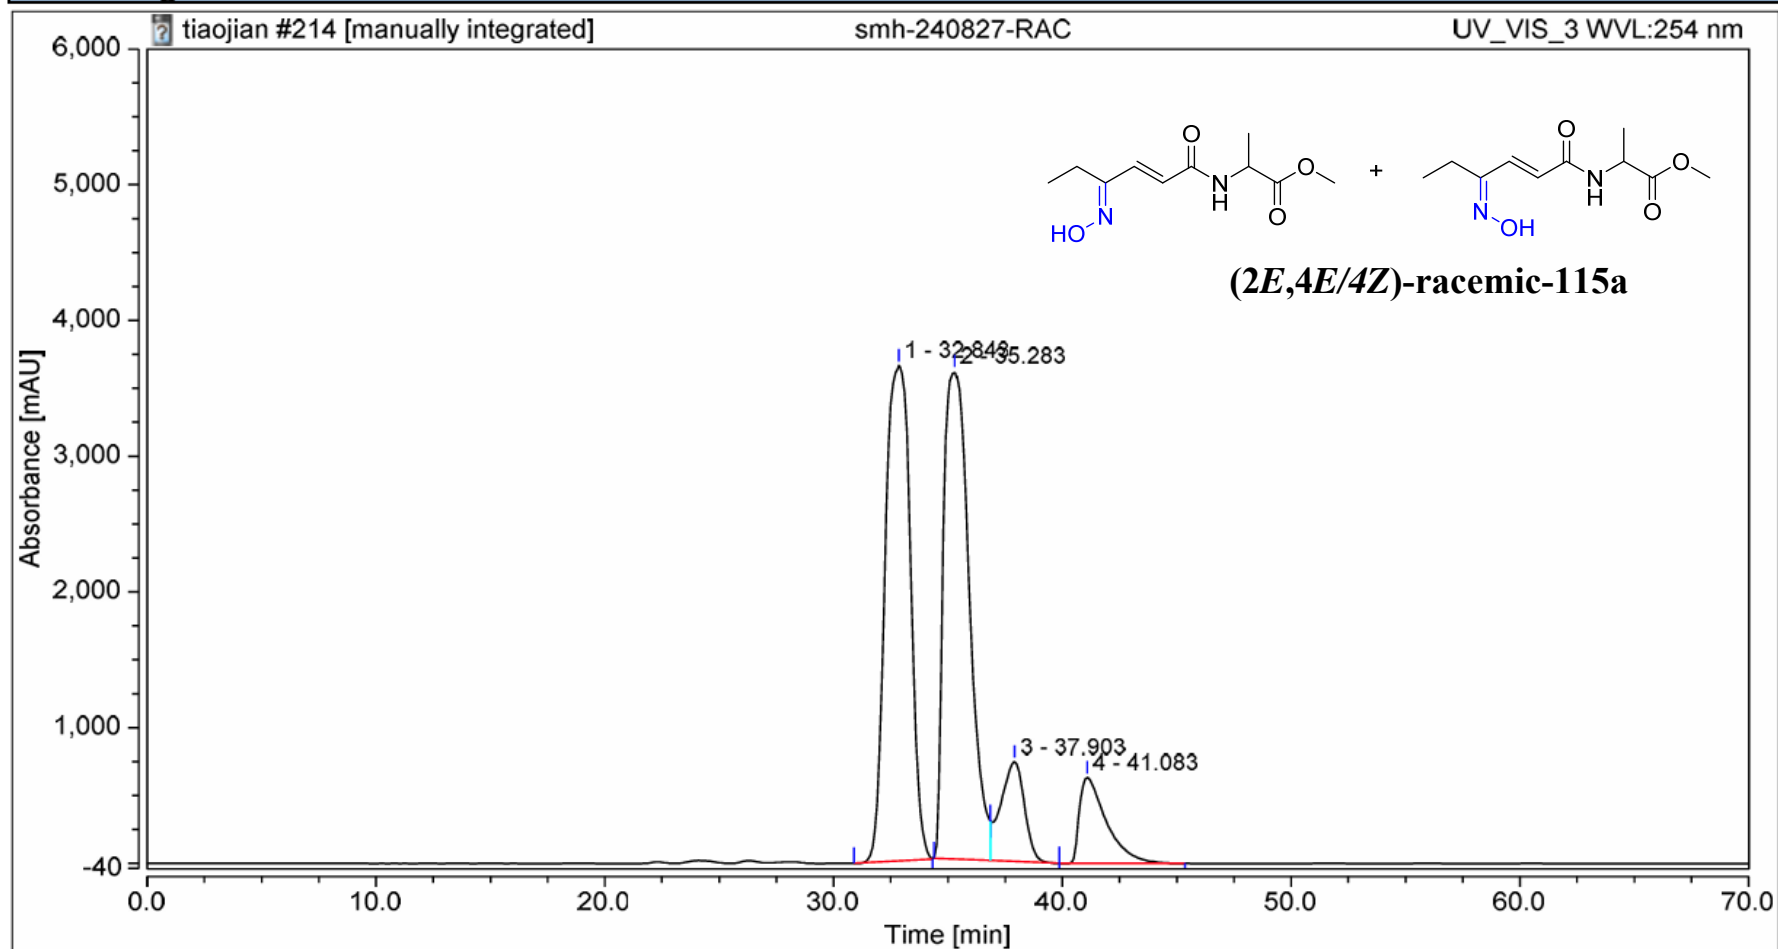

| Integration Results |                       |                 |                    |                      |                |
|---------------------|-----------------------|-----------------|--------------------|----------------------|----------------|
| No.                 | Retention Time<br>min | Area<br>mAU*min | Relative Area<br>% | Relative Height<br>% | Amount<br>n.a. |
| 1                   | 32.843                | 4656.898        | 42.04              | 42.38                | n.a.           |
| 2                   | 35.283                | 4666.573        | 42.13              | 41.76                | n.a.           |
| 3                   | 37.903                | 894.617         | 8.08               | 8.54                 | n.a.           |
| 4                   | 41.083                | 859.284         | 7.76               | 7.33                 | n.a.           |
| Total:              |                       | 11077.372       | 100.00             | 100.00               |                |



# Chromatogram

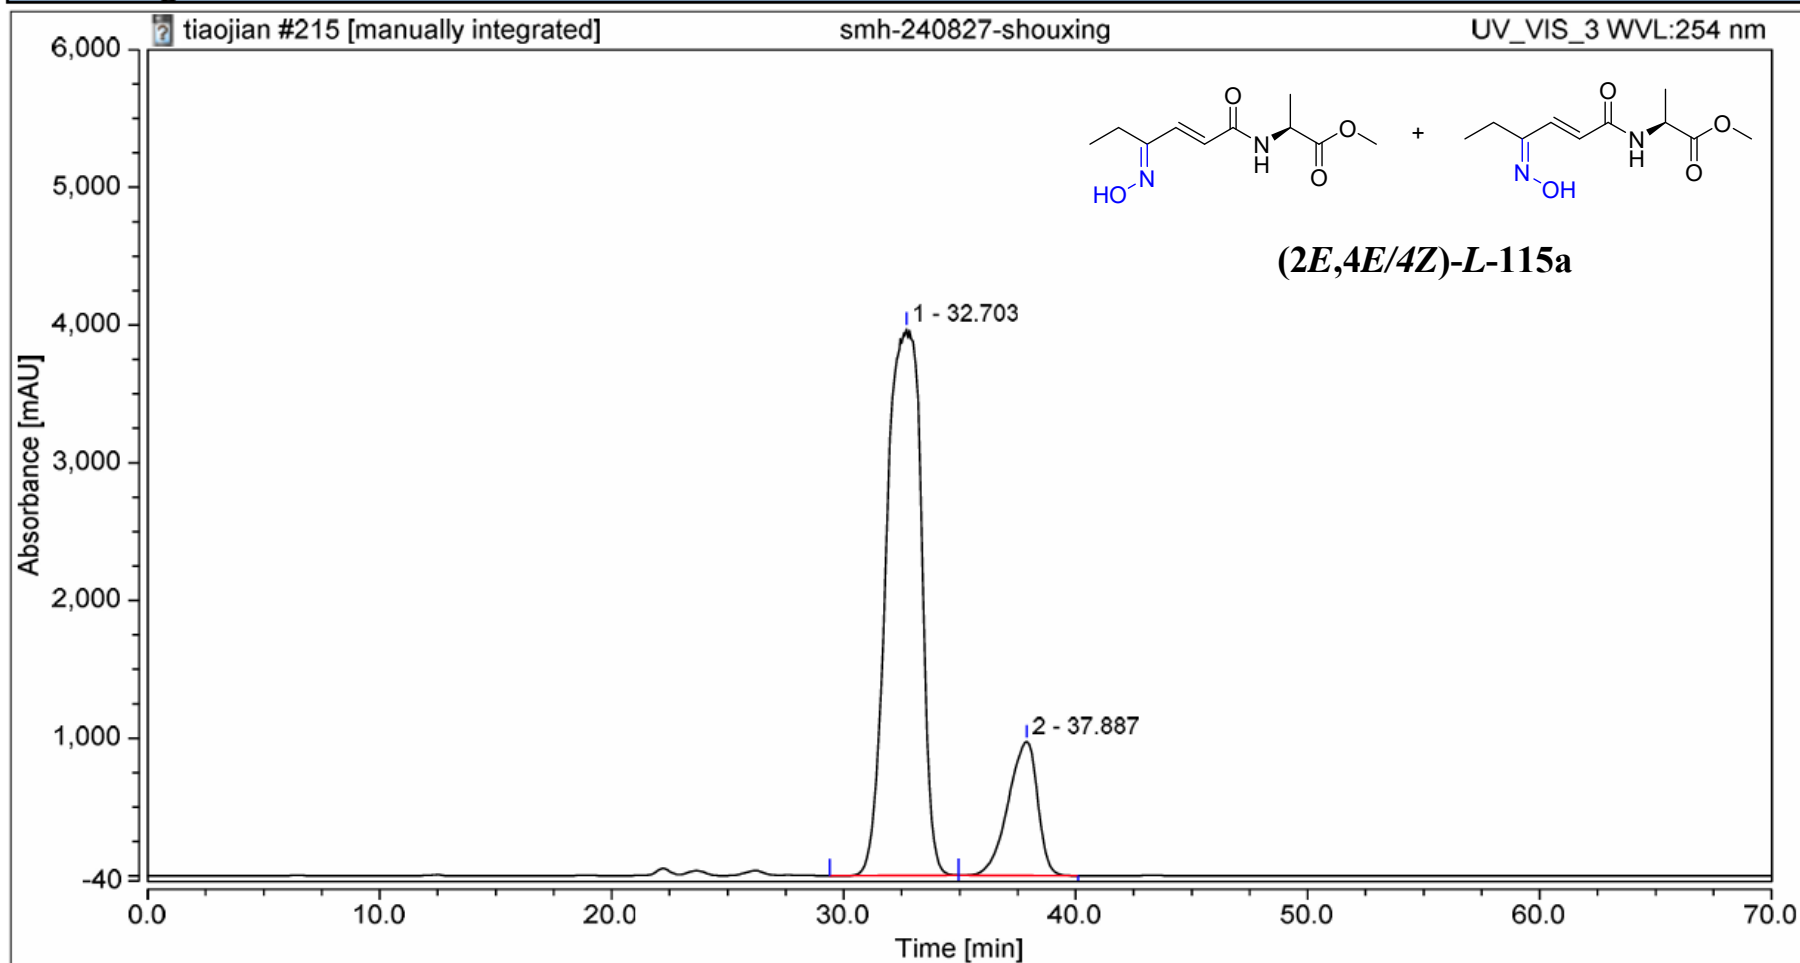

| Integration Results |                       |                 |                    |                      |                |
|---------------------|-----------------------|-----------------|--------------------|----------------------|----------------|
| No.                 | Retention Time<br>min | Area<br>mAU*min | Relative Area<br>% | Relative Height<br>% | Amount<br>n.a. |
| 1                   | 32.703                | 6872.067        | 82.78              | 80.32                | n.a.           |
| 2                   | 37.887                | 1429.925        | 17.22              | 19.68                | n.a.           |
| Total:              |                       | 8301.992        | 100.00             | 100.00               |                |
